# Supplementary material for: Comparative-effectiveness research of COVID-19 treatment: a rapid scoping review
Source: PubMed Central journal article supplement — BMJ Open. 2022 Jun 3;12(6):e045115. doi: 10.1136/bmjopen-2020-045115 (PMC9170799; doi:10.1136/bmjopen-2020-045115), 2022-06-03
Supplement: bmjopen-2020-045115.draft_revisions.pdf [file bmjopen-2020-045115.draft_revisions.pdf]

# BMJ Open

BMJ Open is committed to open peer review. As part of this commitment we make the peer review history of every article we publish publicly available.

When an article is published we post the peer reviewers' comments and the authors' responses online. We also post the versions of the paper that were used during peer review. These are the versions that the peer review comments apply to.

The versions of the paper that follow are the versions that were submitted during the peer review process. They are not the versions of record or the final published versions. They should not be cited or distributed as the published version of this manuscript.

BMJ Open is an open access journal and the full, final, typeset and author-corrected version of record of the manuscript is available on our site with no access controls, subscription charges or pay-per-view fees (<http://bmjopen.bmj.com>).

If you have any questions on BMJ Open's open peer review process please email [info.bmjopen@bmj.com](mailto:info.bmjopen@bmj.com)

# BMJ Open

## Evidence on the effectiveness and safety of pharmacological treatments for COVID-19: A rapid scoping review

|                               |                                                                                                                                                                                                                                                                                                                                                                                                                                                                                                                                                                                                                                                                                                                                                                                                                                                                                                                                                                                                                                                                                                                                                                                                                                                                                                                       |
|-------------------------------|-----------------------------------------------------------------------------------------------------------------------------------------------------------------------------------------------------------------------------------------------------------------------------------------------------------------------------------------------------------------------------------------------------------------------------------------------------------------------------------------------------------------------------------------------------------------------------------------------------------------------------------------------------------------------------------------------------------------------------------------------------------------------------------------------------------------------------------------------------------------------------------------------------------------------------------------------------------------------------------------------------------------------------------------------------------------------------------------------------------------------------------------------------------------------------------------------------------------------------------------------------------------------------------------------------------------------|
| Journal:                      | <i>BMJ Open</i>                                                                                                                                                                                                                                                                                                                                                                                                                                                                                                                                                                                                                                                                                                                                                                                                                                                                                                                                                                                                                                                                                                                                                                                                                                                                                                       |
| Manuscript ID                 | bmjopen-2020-045115                                                                                                                                                                                                                                                                                                                                                                                                                                                                                                                                                                                                                                                                                                                                                                                                                                                                                                                                                                                                                                                                                                                                                                                                                                                                                                   |
| Article Type:                 | Original research                                                                                                                                                                                                                                                                                                                                                                                                                                                                                                                                                                                                                                                                                                                                                                                                                                                                                                                                                                                                                                                                                                                                                                                                                                                                                                     |
| Date Submitted by the Author: | 23-Sep-2020                                                                                                                                                                                                                                                                                                                                                                                                                                                                                                                                                                                                                                                                                                                                                                                                                                                                                                                                                                                                                                                                                                                                                                                                                                                                                                           |
| Complete List of Authors:     | Rios, Patricia; St Michael's Hospital Li Ka Shing Knowledge Institute, Knowledge Translation Program<br>Radhakrishnan, Amruta; St Michael's Hospital Li Ka Shing Knowledge Institute, Knowledge Translation Program<br>Darvesh, Nazia; St Michael's Hospital Li Ka Shing Knowledge Institute, Knowledge Translation Program<br>Antony, Jesmin; St Michael's Hospital Li Ka Shing Knowledge Institute, Knowledge Translation Program<br>Williams, Chantal; St Michael's Hospital Li Ka Shing Knowledge Institute, Knowledge Translation Program<br>Ramkissoon, Naveeta; St Michael's Hospital Li Ka Shing Knowledge Institute, Knowledge Translation Program<br>Pham, Ba; St Michael's Hospital Li Ka Shing Knowledge Institute, Knowledge Translation Program<br>Cormack, Gordon; University of Waterloo, David R. Cheriton School of Computer Science<br>Grossman, Maura; University of Waterloo, David R. Cheriton School of Computer Science<br>Muller, Matthew; St Michael's Hospital Li Ka Shing Knowledge Institute; University of Toronto, Medicine<br>Straus, Sharon; St Michael's Hospital Li Ka Shing Knowledge Institute, Knowledge Translation Program; University of Toronto, Geriatric Medicine<br>Tricco, Andrea; St Michael's Hospital Li Ka Shing Knowledge Institute, Knowledge Translation Program |
| Keywords:                     | COVID-19, RESPIRATORY MEDICINE (see Thoracic Medicine), Clinical trials < THERAPEUTICS                                                                                                                                                                                                                                                                                                                                                                                                                                                                                                                                                                                                                                                                                                                                                                                                                                                                                                                                                                                                                                                                                                                                                                                                                                |
|                               |                                                                                                                                                                                                                                                                                                                                                                                                                                                                                                                                                                                                                                                                                                                                                                                                                                                                                                                                                                                                                                                                                                                                                                                                                                                                                                                       |

SCHOLARONE™  
Manuscripts

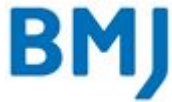

I, the Submitting Author has the right to grant and does grant on behalf of all authors of the Work (as defined in the below author licence), an exclusive licence and/or a non-exclusive licence for contributions from authors who are: i) UK Crown employees; ii) where BMJ has agreed a CC-BY licence shall apply, and/or iii) in accordance with the terms applicable for US Federal Government officers or employees acting as part of their official duties; on a worldwide, perpetual, irrevocable, royalty-free basis to BMJ Publishing Group Ltd ("BMJ") its licensees and where the relevant Journal is co-owned by BMJ to the co-owners of the Journal, to publish the Work in this journal and any other BMJ products and to exploit all rights, as set out in our [licence](#).

The Submitting Author accepts and understands that any supply made under these terms is made by BMJ to the Submitting Author unless you are acting as an employee on behalf of your employer or a postgraduate student of an affiliated institution which is paying any applicable article publishing charge ("APC") for Open Access articles. Where the Submitting Author wishes to make the Work available on an Open Access basis (and intends to pay the relevant APC), the terms of reuse of such Open Access shall be governed by a Creative Commons licence – details of these licences and which [Creative Commons](#) licence will apply to this Work are set out in our licence referred to above.

Other than as permitted in any relevant BMJ Author's Self Archiving Policies, I confirm this Work has not been accepted for publication elsewhere, is not being considered for publication elsewhere and does not duplicate material already published. I confirm all authors consent to publication of this Work and authorise the granting of this licence.

1 Evidence on the effectiveness and safety of pharmacological treatments for COVID-19:

2 A rapid scoping review

3 Patricia Rios<sup>1</sup> Email: patricia.rios@unityhealth.to

4 Amruta Radhakrishnan<sup>1</sup> Email: amruta.radhakrishnan@unityhealth.to

5 Nazia Darvesh<sup>1</sup> Email: nazia.darvesh@unityhealth.to

6 Jesmin Antony<sup>1</sup> Email: jesmin.antony@unityhealth.to

7 Chantal Williams<sup>1</sup> Email: chantal.williams@unityhealth.to

8 Naveeta Ramkissoon<sup>1</sup> Email: naveeta.ramkissoon@unityhealth.to

9 Ba' Pham<sup>1</sup> Email: ba.pham@theta.utoronto.ca

10 Gordon V. Cormack<sup>2</sup> Email: gvcormac@uwaterloo.ca

11 Maura R. Grossman<sup>2</sup> Email: maura.grossman@uwaterloo.ca

12 Matthew P. Muller<sup>1,3</sup> Email: matthew.muller@unityhealth.to

13 Sharon E. Straus<sup>1,4</sup> Email: sharon.straus@unityhealth.to

14 Andrea C. Tricco<sup>1,5\*</sup> Email: andrea.tricco@unityhealth.to

15 <sup>1</sup>Li Ka Shing Knowledge Institute, St. Michael's Hospital, Unity Health Toronto, Toronto,  
16 Ontario, Canada

17 <sup>2</sup>David R. Cheriton School of Computer Science, University of Waterloo, Waterloo, Ontario,  
18 Canada

19 <sup>3</sup>Department of Medicine, University of Toronto, Toronto, Ontario, Canada

20 <sup>4</sup>Department of Geriatric Medicine, University of Toronto, Toronto, Ontario, Canada

21 <sup>5</sup>Epidemiology Division, Dalla Lana School of Public Health and Institute for Health,  
22 Management, and Evaluation, University of Toronto, Toronto, Ontario, Canada

23 \*Corresponding Author

1  
2  
3  
4  
5  
6  
7  
8  
9  
10  
11  
12  
13  
14  
15  
16  
17  
18  
19  
20  
21  
22  
23  
24  
25  
26  
27  
28  
29  
30  
31  
32  
33  
34  
35  
36  
37  
38  
39  
40  
41  
42  
43  
44  
45  
46  
47  
48  
49  
50  
51  
52  
53  
54  
55  
56  
57  
58  
59  
60

24 Andrea C. Tricco

25 Knowledge Translation Program

26 Li Ka Shing Knowledge Institute

27 209 Victoria Street, 7<sup>th</sup> Floor, East Building, Toronto, ON, M5B 1T8

28 St. Michael's Hospital, Unity Health Toronto

29 Toronto, Canada

30 Email: Andrea.Tricco@unityhealth.to

31 Phone: 416-864-6060 ext. 77521

32 Word count: 3937

For peer review only

## 33 ABSTRACT

34 **Objectives:** The current global pandemic of Coronavirus Disease 2019 (COVID-19) has  
35 produced a high burden of disease and mortality. For current research efforts to support optimal  
36 decision-making for front-line healthcare workers, rigorous and systematic knowledge synthesis  
37 must be made available.

38 **Design:** Rapid scoping review

39 **Setting:** Secondary care

40 **Participants:** Adults of any age treated for COVID-19

41 **Interventions:** Pharmacologic interventions for COVID-19

42 **Primary and secondary outcome measures:** Lab-confirmed coronavirus infection (primary  
43 outcome of interest), hospitalization, Intensive Care Unit (ICU) admission, mortality, and  
44 adverse events (e.g., cardiovascular events, changes in liver enzymes, thromboembolism)

45 **Results:** The search and screening identified 152 potentially relevant full-text articles, of which  
46 107 were excluded, resulting in 28 articles (8 randomised controlled trials, 1 quasi-randomised  
47 trial, and 19 cohort studies). The most commonly studied interventions were antiviral drugs,  
48 followed by hydroxychloroquine/chloroquine, corticosteroids, monoclonal antibodies,  
49 convalescent plasma, immunoglobulins, and interferons. Reported outcomes included admission  
50 to intensive care unit or need for mechanical ventilation, changes in pneumonia symptoms,  
51 morality, and adverse events. Overall results from the studies were inconclusive or conflicted  
52 with one another, preventing any clearly effective treatment candidates from being identified.  
53 Additionally, some potentially serious adverse events such as ventricular arrhythmia have been  
54 reported in relation to interventions like hydroxychloroquine/chloroquine; highlighting the need  
55 to carefully evaluate the safety of interventions as well as their effectiveness.

1  
2  
3 56 **Conclusions:** The current body of evidence shows there are a number of pharmacologic  
4  
5 57 treatment options under study; however, results regarding their effectiveness have been  
6  
7  
8 58 inconclusive. The need for evidence to support clinical guidance during the rapidly evolving  
9  
10 59 COVID-19 global pandemic show an ideal use for responsive knowledge synthesis methods.  
11  
12 60 Specifically, a living systematic review and network meta-analysis of all potential COVID-19  
13  
14 61 treatments under study in human trials would provide a current and reliable source of evidence to  
15  
16 62 support treatment decisions.  
17  
18  
19 63 Keywords: COVID-19; RESPIRATORY MEDICINE; Clinical trials<THERAPEUTICS  
20  
21  
22  
23  
24  
25  
26  
27  
28  
29  
30  
31  
32  
33  
34  
35  
36  
37  
38  
39  
40  
41  
42  
43  
44  
45  
46  
47  
48  
49  
50  
51  
52  
53  
54  
55  
56  
57  
58  
59  
60

## 64 **STRENGTHS AND LIMITATIONS OF THIS STUDY**

- 65 • Automated search and screening techniques allowed for a more comprehensive search to  
66 be conducted compared to non-automated searches
- 67 • The reduced workload from implementing automated search and screening allowed for  
68 more rigorous review methods to be used despite the short timeline
- 69 • Information sources still had to be carefully selected to complete the project on a short  
70 timeline and some international sources could not be searched



## 71 INTRODUCTION

72 The current global pandemic of Coronavirus Disease 2019 (COVID-19) has resulted in a high  
73 burden of disease and mortality worldwide [1, 2]. Aside from a recent trial of dexamethasone, a  
74 corticosteroid, that reduced 28-day mortality in people requiring oxygen or mechanical  
75 ventilation, there are few studies providing strong evidence to support specific pharmacological  
76 treatments for COVID-19 [3]. The lack of clearly promising treatments for COVID-19 has  
77 resulted in the almost constant production of trials and observational studies testing potential  
78 pharmacological options. Attempts to synthesize this evidence thus far have resulted in various  
79 reviews focusing on single drugs or isolated drug classes [4-10]. While attempts to leverage this  
80 disparate evidence into clinical guidelines have produced weak recommendations that provide  
81 little direction for pharmacological treatment of COVID-19 [11-13]. For these research efforts to  
82 support optimal decision-making for front-line healthcare workers, rigorous and systematic  
83 syntheses that compare all of the current evidence must be available.

84 The objective of this rapid scoping review was to identify pharmacological interventions for  
85 COVID-19 that were evaluated in human studies to determine if there is any evidence of their  
86 effectiveness or safety.

## 87 METHODS

88 The rapid scoping review conduct was guided by the updated Joanna Briggs Guide [14] for  
89 scoping reviews, alongside the World Health Organization (WHO) Guide to rapid reviews [15].  
90 The protocol for the review was registered using the Open Science Framework  
91 (<https://osf.io/ypz7x>). An integrated knowledge translation approach was used to engage with the  
92 knowledge users from Health Canada throughout the conduct of the rapid review including  
93 during: research question development, literature search, study inclusion, interpretation of

1  
2  
3 94 results, and draft report. The knowledge user also commissioned our team to conduct a prior  
4  
5 95 rapid review focusing on antiviral or antibody treatments for COVID-19 that was published as a  
6  
7 96 pre-print article [16] so some of the studies reported in that review are also reported in this  
8  
9 97 manuscript given the overlap in subject matter. Reporting of results was guided using the  
10  
11 98 Preferred Reporting Items for Systematic Reviews and Meta-Analyses extension to Scoping  
12  
13 99 Reviews (PRISMA-ScR) Statement [17] (Appendix 1); as a PRISMA extension specific to rapid  
14  
15 100 reviews is currently under development.

### 19 101 **Patient and Public Involvement**

20  
21 102 Since this work was carried out as part of a rapid response to the COVID-19 pandemic project  
22  
23 103 timelines did not allow for participation of any patients or members of the public in this scoping  
24  
25 104 review.

### 28 105 **Literature search**

29  
30  
31 106 Comprehensive literature searches and automated search and citation screening [18] were used in  
32  
33 107 combination to gather relevant evidence from MEDLINE, EMBASE, Cochrane library, and pre-  
34  
35 108 print servers (biorxiv/medrxiv). Grey (i.e., difficult to locate or unpublished) literature was  
36  
37 109 searched via international clinical trial registries (e.g., clinical trials.gov, European Union [EU]  
38  
39 110 clinical trial register, Chinese Clinical Trial Registry, WHO international clinical trials register)  
40  
41 111 and Google Scholar. The EMBASE search strategy is available in Appendix 2.

42  
43 112 The literature was searched from inception up to and including May 21, 2020. Titles and  
44  
45 113 abstracts from public archives were identified for screening using Continuous Active Learning<sup>®</sup>  
46  
47 114 (CAL<sup>®</sup>) [18], which uses supervised machine learning. For archives that could be retrieved in  
48  
49 115 their entirety (e.g., MEDLINE), the entire archive was processed and searched using CAL<sup>®</sup>. For  
50  
51 116 those archives that could only be accessed using keywords (e.g., clinicaltrials.gov), broad  
52  
53  
54  
55  
56  
57  
58  
59  
60

1  
2  
3 117 relevant search terms were applied (e.g., COVID-19, treatment). CAL<sup>®</sup> then identified and  
4  
5 118 ranked the titles and abstracts most likely to meet specific inclusion criteria, based on the  
6  
7  
8 119 screening results that were previously identified and reviewed. This process continued iteratively  
9  
10 120 until none of the identified articles met the inclusion criteria. The automated search was  
11  
12 121 supplemented by searching unique citations that were not available in MEDLINE via EMBASE.  
13  
14 122 Hence, a combination of an automated search plus an electronic literature search of EMBASE  
15  
16  
17 123 was conducted.

### 19 124 **Eligibility criteria**

21 125 The eligibility criteria followed the PICOST framework and consisted of:

- 24 126 • Population: Individuals of any age diagnosed with COVID-19.
- 26 127 • Intervention: Antiviral agents, antibiotics, antiparasitics, antimalarials, interferons, non-  
28 128 specific anti-inflammatories, anticoagulants, immunosuppressive therapies, monoclonal  
30 129 antibodies, kinase inhibitors, angiotensin converting enzyme inhibitors, angiotensin receptor  
32 130 blockers, convalescent plasma, intravenous immunoglobulin, interleukin inhibitors, and other  
34 131 compounds under investigation in human clinical trials as potential COVID-19 therapies (see  
36 132 Appendix 3). Chinese medicine and complementary and alternative medicine – either alone  
38 133 or in combination with these medications – were excluded.
- 42 134 • Comparator: Any of the interventions listed above, no intervention, or placebo.
- 44 135 • Outcomes: Lab-confirmed coronavirus infection (primary outcome of interest),  
46 136 hospitalization, Intensive Care Unit (ICU) admission, mortality, and adverse events (e.g.,  
48 137 cardiovascular events, changes in liver enzymes, thromboembolism).
- 50 138 • Study designs: Randomized controlled trials (RCTs), non-randomized controlled trials  
52 139 (NRCTs, e.g., such as quasi-RCTs, non-randomized trials, interrupted time series, controlled

1  
2  
3 140 before-after), and observational studies (e.g., cohort, case control) were included. Studies  
4  
5 141 must have a control or comparator in order to be eligible for inclusion and as such, cross-  
6  
7 142 sectional, case series, case reports, and qualitative studies were excluded.  
8  
9

- 10 143 • Time periods: All periods of time and duration of follow-up were included.  
11

## 12 144 **Study selection**

13  
14  
15 145 In order to meet the short timeline requested by the knowledge users, a streamlined approach to  
16  
17 146 study selection was employed. An automated approach to initial screening with CAL<sup>®</sup> was used  
18  
19 147 to process all results from the database search (Embase) and other sources (e.g., Medline,  
20  
21 148 Cochrane Library, clinical trial registries) to identify the most relevant citations that were then  
22  
23 149 retained for further for full-text screening [18]. A calibration exercise was conducted prior to  
24  
25 150 full-text screening using a random sample of 10 articles until reviewers reached at least 75%  
26  
27 151 agreement. A screening form based on the eligibility criteria was prepared for reviewers to aid in  
28  
29 152 making consistent judgements on article relevance. Subsequently, screening was completed by a  
30  
31 153 single reviewer and verified by independent secondary reviewers whereby one secondary  
32  
33 154 reviewer screened a sample of excluded citations (approximately 500) and another secondary  
34  
35 155 reviewer screened all excluded full-text studies.  
36  
37  
38  
39

## 40 156 **Data items and data charting**

41  
42 157 A charting form was developed and calibrated amongst the entire review team using two  
43  
44 158 randomly selected full-text articles to ensure a standard approach to data collection. Following  
45  
46 159 successful completion of the calibration exercise, included studies were charted by single  
47  
48 160 reviewers and all outcome data were verified by a second reviewer to ensure accuracy. As this  
49  
50 161 project was a scoping review, quality appraisal of included studies was not conducted.  
51  
52  
53  
54  
55  
56  
57  
58  
59  
60

1  
2  
3 162 The items collected in data charting included study characteristics (e.g., study duration, study  
4  
5 163 design, country of conduct), patient characteristics (e.g., type of diagnosis, mean age, co-  
6  
7 164 morbidities), intervention details (e.g., type of intervention, dose, timing of treatment),  
8  
9  
10 165 comparator details (e.g., comparator intervention, dose), and outcome results (e.g.,  
11  
12 166 hospitalizations due to coronavirus, adverse events, mortality) at the longest duration of follow-  
13  
14  
15 167 up.

## 168 **Synthesis**

169 The characteristics of the included studies were summarized narratively and the results were  
20  
21 summarized descriptively including summary statistics. Detailed tables of study characteristics  
22  
23 and results were prepared to support the data presented in the text; tables of study results are  
24  
25 organized according to study design.  
26  
27  
28  
29

## 173 **RESULTS**

### 174 **Literature Search**

175 The database search, grey literature search, and automated screening returned a total of 2,075  
36  
37 176 potentially relevant citations, of which 1,923 were excluded after further review. This left 152  
38  
39 177 articles to undergo full-text screening; 107 were excluded subsequently, resulting in 28 articles  
40  
41 included in the review (Figure 1; Appendix 4).  
42  
43

### 179 **Characteristics of included studies**

180 Of the 28 studies included in this review, 8 were randomised controlled trials, 1 was a quasi-  
47  
48 181 randomised controlled trial, and 19 were cohort studies. The majority of included articles (n=16)  
49  
50 182 were obtained from pre-print servers and the rest (n=12) were published in peer-reviewed  
51  
52 183 journals. All included studies were published in 2020, with the majority conducted in China  
53  
54 184 (n=17), followed by the USA (n=6), and single studies each from Brazil, France, Hong Kong,  
55  
56  
57  
58  
59  
60

1  
2  
3 185 Spain, and South Korea; all articles were published in English or had English translations  
4  
5 186 available. Sample sizes for the controlled trials ranged from 28 to 236 participants, while the  
6  
7 187 cohorts ranged from 21 to 1,820 participants. All of the studies were conducted in adult  
8  
9 188 populations ranging from 38 to 68 years and 45 to 62 years for the controlled trials and cohort  
10  
11 189 studies, respectively. Comorbidities were reported in most of the studies (n=25) and commonly  
12  
13 190 included conditions such as diabetes, heart disease, hypertension, and renal failure (Table 1;  
14  
15 191 Appendix 5)

### 192 **Interventions examined in the included studies**

193 The most commonly studied interventions were antiviral therapies including lopinavir/ritonavir  
194 (Kaletra), umifenovir (Arbidol), oseltamivir, ganciclovir, favipravir, and remdesivir (n=11) as  
195 well as lopinavir/ritonavir combined with interferons (n=1), and the drugs hydroxychloroquine  
196 and chloroquine either alone (n=10) or combined with azithromycin (n=3). The next most  
197 common treatment categories were corticosteroids (n=5), monoclonal antibodies (n=2),  
198 convalescent plasma (n=1), immunoglobulins (n=1), and interferons (n=1; Table 1; Appendix 5).

### 199 **Outcomes reported in the included studies**

200 All of the included studies reported exclusively on hospitalized patients, thus there are no results  
201 for the specific outcome 'hospitalization' that was included in the review protocol. The most  
202 commonly reported outcome was mortality (n=22), followed by adverse events (n=14), transfer  
203 to ICU or initiation of mechanical ventilation (n=11), and finally, evidence/progression of  
204 pneumonia (n=5; Table 1; Appendix 5).

205 Table 1: Summary of study and patient characteristics

| <i>Characteristics (value type)</i>                                                                                 | <b>Controlled Trials<br/>(n=9)</b>                  | <b>Cohort Studies<br/>(n=19)</b>                                  |
|---------------------------------------------------------------------------------------------------------------------|-----------------------------------------------------|-------------------------------------------------------------------|
| <i>Age (years) of population (range)</i>                                                                            | 44.7 – 62                                           | 37.9 – 68                                                         |
| <i>Sample size [median (range)]</i>                                                                                 | 127 (28 – 236)                                      | 181 (21 – 1820)                                                   |
| <i>Study duration (days) [median (range)]</i>                                                                       | 21 (10 – 39)                                        | 38.5 (7 – 122)                                                    |
| <i>Comorbidities reported in study population</i>                                                                   | Yes (8)/No (1)                                      | Yes (17)/No (2)                                                   |
| <b>Publication Type</b>                                                                                             |                                                     |                                                                   |
| <i>Pre-print server</i>                                                                                             | 4                                                   | 12                                                                |
| <i>Peer-reviewed journal</i>                                                                                        | 5                                                   | 7                                                                 |
| <b>Country of conduct</b>                                                                                           |                                                     |                                                                   |
|                                                                                                                     | China (6); USA (1);<br>Brazil (1); Hong Kong<br>(1) | China (11); USA (5);<br>France (1); Spain<br>(1); South Korea (1) |
| <b>Interventions*</b>                                                                                               |                                                     |                                                                   |
| <b>Antivirals</b><br><i>(lopinavir/ritonavir, umifenovir, favipravir,<br/>ganciclovir, oseltamivir, remdesivir)</i> | 4                                                   | 7                                                                 |
| <i>+interferon</i>                                                                                                  | 1                                                   | --                                                                |
| <b>Hydroxychloroquine,<br/>Chloroquine</b>                                                                          | 3                                                   | 7                                                                 |

|  |                                                                         |    |    |
|--|-------------------------------------------------------------------------|----|----|
|  | <i>+antibiotics</i>                                                     | -- | 3  |
|  | <b><i>Convalescent Plasma</i></b>                                       | -- | 1  |
|  | <b><i>Corticosteroids</i></b>                                           | 1  | 4  |
|  | <b><i>Immunoglobulins</i></b>                                           | -- | 1  |
|  | <b><i>Interferons</i></b>                                               | -- | 1  |
|  | <b><i>Monoclonal Antibodies</i></b><br><i>(meplazumab, tocilizumab)</i> | 1  | 1  |
|  | <b><i>Outcomes Reported</i></b>                                         |    |    |
|  | <i>ICU admission/Mechanical ventilation</i>                             | 5  | 6  |
|  | <i>Clinically confirmed pneumonia</i>                                   | 3  | 2  |
|  | <i>Mortality</i>                                                        | 7  | 16 |
|  | <i>Adverse Events</i>                                                   | 8  | 6  |

\*Total number of interventions exceeds the number of included studies due to the presence of combination therapies and studies with more than 2 treatment arms or active comparator groups

## 206 **Results from studies of antiviral treatment**

207 Four RCTs [19-22] and seven cohort studies [23-29] examined antiviral medications including  
 208 lopinavir/ritonavir (n=6), umifenovir (n=5), lopinavir/ritonavir + umifenovir (n=2),  
 209 lopinavir/ritonavir + interferon beta-1b (n=1), favipravir (n=1), ganciclovir (n=1), oseltamivir  
 210 (n=1), and remdesivir (n=1). Outcomes reported among these studies include ICU  
 211 admission/mechanical ventilation (n=4), confirmation of or changes in pneumonia (n=4),  
 212 mortality (n=8), and adverse events (n=7).



1  
2  
3 213 Three controlled trials [19, 21, 22] found that fewer patients in the antiviral treatment group  
4  
5 214 (remdesivir, umifenovir, lopinavir/ritonavir) were admitted to ICU or required mechanical  
6  
7 215 ventilation compared to control; however, the differences were not statistically significant (data  
8  
9 216 not shown, Table 2, Appendix 6). Two cohort studies [23, 29] found signs of improvement in  
10  
11 217 pneumonia in patients treated with lopinavir/ritonavir + umifenovir and with umifenovir alone,  
12  
13 218 the difference was only statistically significant for lopinavir/ritonavir + umifenovir compared to  
14  
15 219 umifenovir alone (69% showing improvement vs 25%;  $p < 0.05$ ). Of the eight studies reporting  
16  
17 220 mortality outcomes, three controlled trials [20-22] and one cohort study [24] examining  
18  
19 221 umifenovir, favipravir, lopinavir/ritonavir, and lopinavir/ritonavir + interferon beta-1b reported  
20  
21 222 no deaths in their patient population at study end. One controlled trial [19] and one cohort study  
22  
23 223 [25] found non-statistically significant reductions in mortality for patients treated with  
24  
25 224 remdesivir compared to placebo (1.1; 95% confidence interval (CI) -8.1% to 10.3%) and  
26  
27 225 lopinavir/ritonavir + umifenovir compared to lopinavir/ritonavir (2.6% v 2.9%), and two cohort  
28  
29 226 studies [27, 28] found no difference in mortality rates between patients treated with antivirals  
30  
31 227 compared to corticosteroids (data not shown, Table 2, Appendix 6). Four trials [19-22] and three  
32  
33 228 cohort studies [24, 26, 29] examining antiviral therapies reported adverse events including  
34  
35 229 gastrointestinal symptoms ( $n = 5$ ), arrhythmia or abnormal ECG findings ( $n = 1$ ), and changes in  
36  
37 230 liver function ( $n = 4$ ; Table 2, Appendix 6).

### 231 **Results from studies of hydroxychloroquine and chloroquine**

232 Three controlled trials [30-32] and seven cohort studies [24, 33-38] examined  
233 hydroxychloroquine either alone ( $n = 10$ ) or combined with azithromycin ( $n = 3$ ) compared to  
234 control/standard care ( $n = 6$ ) or other treatments ( $n = 3$ ), and one study compared low-dose to high-  
235 dose chloroquine. Outcomes reported among these studies included ICU admission/mechanical

1  
2  
3 236 ventilation (n=6), confirmation of or changes in pneumonia (n=1), mortality (n=7), and adverse  
4  
5 237 events (n=6).  
6  
7  
8 238 Three cohort studies [33, 34, 37] reporting ICU admission or mechanical ventilation found a  
9  
10 239 decrease in admission rates for patients taking hydroxychloroquine + azithromycin (hazard ratio  
11  
12 240 [HR] 0.43; 95% CI 0.16 to 1.12) and hydroxychloroquine alone (relative risk [RR] 0.91; 95% CI  
13  
14 241 0.47 to 1.8 and RR 0.81; 95% CI 0.55 to 1.18) compared to control, but the differences were not  
15  
16 242 statistically significant. Two cohort studies [24, 35] also found that fewer patients taking  
17  
18 243 hydroxychloroquine were admitted to ICU compared to hydroxychloroquine + azithromycin (9  
19  
20 244 patients vs 21, statistical significance not reported) or lopinavir/ritonavir (1 patient vs 4,  
21  
22 245 p=0.375). In contrast, two cohort studies [33, 36] found patients taking hydroxychloroquine had  
23  
24 246 non-statistically significant increased risk of being admitted to ICU compared to control (HR  
25  
26 247 1.43; 95% CI 0.55 to 3.79 and 19.2% vs 12.2%, statistical significance not reported) and one  
27  
28 248 cohort study [36] found more patients taking hydroxychloroquine and azithromycin were  
29  
30 249 admitted to ICU compared to control (30.7% vs 12.2%, statistical significance not reported). One  
31  
32 250 trial found [31] that more patients taking hydroxychloroquine showed improvement in  
33  
34 251 pneumonia symptoms compared to control (80.6% vs 54.8%, statistical significance not  
35  
36 252 reported). Three cohort studies [30, 33, 38] reporting mortality found statistically significant  
37  
38 253 results, Yu et al. (2019) found a statistically significant decrease in the risk of death (P<0.001) in  
39  
40 254 the hydroxychloroquine group compared to control while Magagnoli et al. (2020) found a  
41  
42 255 significant increase in the risk of death from any cause after adjusting for age, race, sex, body  
43  
44 256 mass index, comorbid conditions, and clinical characteristics at hospital admission (adjusted HR,  
45  
46 257 2.61; 95% CI, 1.10 to 6.17; P=0.03) in patients treated with hydroxychloroquine compared to  
47  
48 258 control. There was a trend for increased mortality in patients treated with hydroxychloroquine  
49  
50  
51  
52  
53  
54  
55  
56  
57  
58  
59  
60

1  
2  
3 259 plus azithromycin compared to control (adjusted HR; 1.14; 95% CI, 0.56 to 2.32; P=0.72), yet  
4  
5 260 this was not statistically significant[33]. The trial by Borba et al. (2020) comparing different  
6  
7 261 dosage regimens of chloroquine also found a statistically significant increase in the risk of death  
8  
9 262 associated with the higher-dose regimen (odds ratio [OR] 3.6; 95%CI, 1.2-10.6) however the  
10  
11 263 statistical significance of the association was no longer present when adjusted for age (OR 2.8;  
12  
13 264 95% CI 0.9 to 8.5). Three cohort studies [34, 36, 37] reported non-statistically significant  
14  
15 265 decreases in risk of mortality among patients taking hydroxychloroquine compared to control  
16  
17 266 (RR 0.61; 95% CI 0.13 to 2.89; RR 0.95; 95% CI 0.74 to 1.23; RR 0.56; 95% CI 0.26 to 1.21)  
18  
19 267 and one cohort study [24] comparing hydroxychloroquine, lopinavir/ritonavir, and a standard  
20  
21 268 care control group reported no deaths among any of the treatment groups at study end. Two  
22  
23 269 cohort studies [33, 36] reporting mortality also found an increased risk of death for patients  
24  
25 270 taking hydroxychloroquine (adjusted HR 1.08; 95% CI 0.63 to 1.85) and hydroxychloroquine +  
26  
27 271 azithromycin (adjusted HR 1.35; 95% CI 0.76 to 2.4 and HR 1.14; 95% CI 0.56 to 2.32) but the  
28  
29 272 association was not statistically significant. Adverse events were reported in three trials [30-32]  
30  
31 273 and three cohort studies [24, 35, 36] and included decreased hemoglobin (n=1), increased  
32  
33 274 creatinine/creatinine phosphokinase (n=1), altered liver function (n=1), rash (n=1), headache  
34  
35 275 (n=1), gastrointestinal symptoms (n=1), and arrhythmia or abnormal ECG findings (n=3; Table 2,  
36  
37 276 Appendix 6).

### 277 **Results from studies of corticosteroid treatments**

278 Four cohort studies [27, 28, 39, 40] and one RCT [41] examined corticosteroid therapy including  
279 adjuvant corticosteroids added to antiviral therapy (n=2), early administration of corticosteroids  
280 (n=1), corticosteroids compared to standard care (n=1), and methylprednisolone compared to

1  
2  
3 281 lopinavir/ritonavir (n=1). Outcomes reported among these studies include ICU  
4  
5 282 admission/mechanical ventilation (n=1) and mortality (n=5).  
6  
7 283 One controlled trial [41] reported rates of admission to ICU and found that early corticosteroid  
8  
9 284 treatment (defined as within 48 hours of admission) statistically significantly reduced the risk of  
10  
11 285 transfer to ICU (OR 0.47; 95% CI 0.25 to 0.88) or need for mechanical ventilation (OR 0.47;  
12  
13 286 95% CI 0.25 to 0.92; p=0.025). Two studies reporting on mortality found statistically significant  
14  
15 287 results, one trial [41] found early corticosteroid treatment (received within 48 hours of hospital  
16  
17 288 admission) statistically significantly reduced the risk of death compared to control (OR 0.45;  
18  
19 289 95% CI 0.22 to 0.91; p=0.024) and one cohort study [39] found in-hospital mortality was  
20  
21 290 statistically significantly higher in patients receiving corticosteroids compared to control (HR  
22  
23 291 1.77; 95% CI 1.08 to 2.89; p=0.023). The three other cohort studies that reported mortality rates  
24  
25 292 also found divergent results: one study [27] found corticosteroids had no effect on risk of death  
26  
27 293 (OR 1.05; 95% CI -1.92 to 2.01), one study [28] reported two deaths in the corticosteroid  
28  
29 294 treatment arm compared to one death in patients treated with antivirals (statistical significance  
30  
31 295 not reported), and the third study [40] reported no deaths in either the corticosteroid treatment  
32  
33 296 group or control (Table 2, Appendix 6).  
34  
35  
36  
37  
38  
39

#### 40 297 **Results from studies of immune supporting therapies**

41  
42 298 Five studies examined immune supporting/modifying therapies such as meplazumab (one  
43  
44 299 controlled trial), tocilizumab (one cohort study), interferon beta-1b (one cohort study),  
45  
46 300 intravenous immunoglobulin (one cohort study), and convalescent plasma (one cohort study).  
47  
48 301 Outcomes reported among these studies include ICU admission (n=1), mortality (n=5), and  
49  
50 302 adverse events (n=2).  
51  
52  
53  
54  
55  
56  
57  
58  
59  
60

1  
2  
3 303 The trial [42] comparing meplazumab to a standard care control arm found a greater rate of  
4  
5 304 recovery from ICU and hospital discharge in patients receiving meplazumab (n=11) compared to  
6  
7 305 control (n=5, p=0.021) and reported no deaths. The cohort study [43] examining tocilizumab  
8  
9  
10 306 only reported on mortality rates and found a significantly increased survival rate in the treatment  
11  
12 307 group compared to control (61.36% vs 48%, p<0.00001). The remaining three cohort studies  
13  
14 308 [44-46] that reported mortality found no statistically significant differences between treatment  
15  
16 309 and controls for intravenous immunoglobulins (33 patients vs 21 patients, p=0.222), interferon  
17  
18 310 beta-1b (20.8% vs 27.3%, p=0.229), and convalescent plasma (5 patients vs 14 patients, p=0.5).  
19  
20  
21 311 Adverse events were reported in two studies: one trial [42] found altered liver function (elevated  
22  
23 312 ALT/AST  $\geq 2$  ULN) in patients receiving meplazumab that lasted for the duration of treatment  
24  
25 313 and the cohort study [46] reported no adverse events associated with treatment with convalescent  
26  
27 314 plasma (Table 2, Appendix 6).  
28  
29  
30  
31  
32  
33  
34  
35  
36  
37  
38  
39  
40  
41  
42  
43  
44  
45  
46  
47  
48  
49  
50  
51  
52  
53  
54  
55  
56  
57  
58  
59  
60

315 Table 2: Summary of Effectiveness and Safety Results

| <i>Treatment comparisons</i>                | <b>ICU admission/<br/>Mechanical<br/>ventilation<sup>a</sup></b> |               | <b>Pneumonia<sup>a</sup></b> |               | <b>Mortality<sup>a</sup></b> |               | <b>Adverse Events<sup>a</sup></b> |                |
|---------------------------------------------|------------------------------------------------------------------|---------------|------------------------------|---------------|------------------------------|---------------|-----------------------------------|----------------|
|                                             | <b>Trial</b>                                                     | <b>Cohort</b> | <b>Trial</b>                 | <b>Cohort</b> | <b>Trial</b>                 | <b>Cohort</b> | <b>Trial</b>                      | <b>Cohort</b>  |
|                                             | <i>Antivirals vs control</i>                                     | 3+            |                              |               | 2+                           | 4+            | 1+                                | 2 <sup>b</sup> |
| <i>vs antivirals</i>                        |                                                                  |               |                              | <b>1+</b>     |                              | 1+            | 2                                 | 1              |
| <i>vs corticosteroids</i>                   |                                                                  |               |                              |               |                              | 2             |                                   |                |
| <i>Antimalarials vs control</i>             |                                                                  | 3+/2-         | 1+                           |               |                              | 4+/1+/2-      | 2                                 |                |
| <i>vs high dose</i>                         |                                                                  |               |                              |               | <b>1-</b>                    |               | 1                                 |                |
| <i>vs antimalarial +antibiotic</i>          |                                                                  | 1+/3-         |                              |               |                              |               |                                   | 2              |
| <i>vs antivirals</i>                        |                                                                  | 1+            |                              |               |                              | 1+            |                                   | 1              |
| <i>Antimalarial + antibiotic vs control</i> |                                                                  | 1+/1-         |                              |               | 1-                           | 1-            |                                   |                |
| <i>Corticosteroids vs control</i>           |                                                                  |               |                              |               |                              | 1+/2-         |                                   |                |
| <i>vs early administration</i>              | <b>1+</b>                                                        |               |                              |               | <b>1+</b>                    |               |                                   |                |

1  
2  
3  
4  
5  
6  
7  
8  
9  
10  
11  
12  
13  
14  
15  
16  
17  
18  
19  
20  
21  
22  
23  
24  
25  
26  
27  
28  
29  
30  
31  
32  
33  
34  
35  
36  
37  
38  
39  
40  
41  
42  
43  
44  
45  
46  
47

|                                              |           |  |              |    |
|----------------------------------------------|-----------|--|--------------|----|
| vs antivirals                                |           |  | 1-           |    |
| <i>Monoclonal antibodies vs control</i>      | <b>1+</b> |  | 1+ <b>1+</b> | 1  |
| <i>Interferons vs control</i>                |           |  | 1+           |    |
| <i>Intravenous immunoglobulin vs control</i> |           |  | 1-           |    |
| <i>Convalescent plasma vs control</i>        |           |  | 1+           | 1+ |

<sup>a</sup>Bolded values indicated statistically significant outcomes

<sup>b</sup>No symbol indicates results that did not indicate direction of effectiveness of intervention

+ study results indicate: decreased risk of or number of patients admitted to ICU/receiving mechanical ventilation or mortality;  
improvement in symptoms/clinical signs of pneumonia

- study results indicate: increased risk of or number of patients admitted to ICU/receiving mechanical ventilation or mortality;  
worsening symptoms/clinical signs of pneumonia

## 317 **DISCUSSION**

318 We completed a rapid scoping review for Health Canada to identify which pharmacologic  
319 interventions have been studied to treat patients with COVID-19. A comprehensive search of  
320 electronic databases, trial registries, and other grey literature sources identified 9 controlled trials  
321 and 19 cohort studies lasting between 7 and 122 days that included approximately 8,000 patients  
322 examining various interventions for COVID-19.

323 It is important to emphasize that a scoping review cannot be used to establish practice or policy  
324 recommendations, as the purpose is to provide an overall summary of the literature that has been  
325 conducted on a given concept [14]. The current evidence indicates there is a broad range of  
326 interventions under study and that there is a heavy emphasis on antivirals, antimalarials, and  
327 corticosteroids in the current literature. The results of the studies that are available thus far often  
328 report conflicting results on the effectiveness of interventions such as hydroxychloroquine,  
329 corticosteroids, and antivirals. Additionally, the majority of the available evidence comes from  
330 observational cohort studies, mostly retrospective, and do not include some of the most recent  
331 data from large scale trials (e.g., RECOVERY in the UK) or include trials for treatments like  
332 anticoagulants for patients at high risk of clots due to COVID-19. Some adverse events have  
333 been reported in relation to interventions such as hydroxychloroquine/chloroquine (ventricular  
334 arrhythmia or abnormal ECG findings) which indicate both safety and effectiveness need to be  
335 explored in future studies before they could be considered for use in COVID-19 treatment.

336 This review is part of a rapidly growing body of knowledge synthesis products related to  
337 treatments for COVID-19, currently there are 184 treatment reviews registered in the  
338 PROSPERO database. To date the published reviews focus on single treatments or single classes  
339 of drugs [4-10] and to our knowledge, there is no other published review examining more than



340 one type of potential COVID-19 treatment. The results of these prior reviews are concordant  
341 with our findings, reporting little certainty in the clinical potential of the interventions they have  
342 examined and often finding conflicting results between individual studies. Future efforts in this  
343 area should focus on using living systematic review methods to keep pace with the rapid growth  
344 of evidence and network meta-analysis methods to allow indirect comparisons of the  
345 effectiveness and safety of all treatments of interest in the clinical community such as antivirals,  
346 monoclonal antibodies, corticosteroids, or antimalarial drugs.

347 There are several strengths to the conduct of this rapid scoping review. The integration of  
348 machine learning allowed for a much more comprehensive search to be completed in a shorter  
349 time while also reducing the workload on reviewers so that more robust rapid review methods  
350 such as using a single reviewer plus verifier for study selection and data charting could be used.  
351 There are some limitations to this review however, as the number of information sources  
352 searched had to be narrowed to accommodate rapid timelines and may have resulted in some  
353 studies being missed. Nonetheless, the methods used in this review were thoughtfully selected  
354 according to our knowledge user needs and the urgent need to provide timely results.

## 355 **CONCLUSIONS**

356 The current state of research for COVID-19 therapies shows a broad range of pharmacologic  
357 options have been evaluated and have largely resulted in inconclusive or conflicting findings  
358 regarding their effectiveness. Additionally, the evidence reported here is largely observational  
359 and does not include a number of large-scale trials that are ongoing but have not yet reported  
360 results. The urgent need for evidence to support clinical guidance and the rapidly evolving nature  
361 of the COVID-19 global pandemic point to a need for responsive knowledge synthesis methods.  
362 Specifically, a living systematic review and network meta-analysis of all potential COVID-19

1  
2  
3 363 treatments under study in human trials would provide an ongoing and timely source of high-  
4  
5 364 quality evidence to support clinical decision making.  
6  
7  
8  
9  
10  
11  
12  
13  
14  
15  
16  
17  
18  
19  
20  
21  
22  
23  
24  
25  
26  
27  
28  
29  
30  
31  
32  
33  
34  
35  
36  
37  
38  
39  
40  
41  
42  
43  
44  
45  
46  
47  
48  
49  
50  
51  
52  
53  
54  
55  
56  
57  
58  
59  
60

For peer review only

1  
2  
3 365 **List of abbreviations**  
4

5  
6 366 AST/ALT: aspartate transaminase/alanine aminotransferase  
7

8  
9 367 CAL: Continuous Active Learning  
10

11  
12 368 COVID-19: Coronavirus disease 2019  
13

14  
15 369 HR: hazard ratio  
16

17  
18 370 ICU: Intensive Care Unit  
19

20  
21 371 NRCT: non-randomized clinical trial  
22

23  
24 372 OR: odds ratio  
25

26  
27 373 PRISMA-ScR: Preferred Reporting Items for Systematic Reviews and Meta-Analyses extension  
28

29 374 to Scoping Reviews  
30

31  
32 375 RCT: randomized controlled trial  
33

34  
35 376 RR: relative risk  
36

37  
38 377 WHO: World Health Organization  
39

40  
41 378 **DECLARATIONS**  
42

43  
44 379 **Ethics approval and consent to participate**  
45

46 380 Not applicable  
47

48  
49 381 **Consent for publication**  
50

51 382 Not applicable  
52  
53  
54  
55  
56  
57  
58  
59  
60

1  
2  
3 383 **Availability of data and materials**  
4

5 384 Data sharing is not applicable to this article as no datasets were generated or analysed during the  
6  
7  
8 385 current study.  
9

10 386 **Competing interests**  
11

12 387 The authors have no competing interests to declare.  
13  
14

15 388 **Funding**  
16

17 389 This work was supported through the Drug Safety and Effectiveness Network funded by the  
18  
19 390 Canadian Institutes of Health Research, the funders had no involvement in the design, conduct,  
20  
21 391 or publication of this study. SES is funded by a Tier 1 Canada Research Chair in Knowledge  
22  
23 392 Translation and the Mary Trimmer Chair in Geriatric Medicine; ACT is funded by a Tier 2  
24  
25 393 Canada Research Chair in Knowledge Synthesis.  
26  
27  
28

29 394 **Open Access**  
30

31 395 This is an Open Access article distributed in accordance with the Creative Commons Attribution  
32  
33 396 Non Commercial (CC BY-NC 4.0) license, which permits others to distribute, remix, adapt,  
34  
35 397 build upon this work non-commercially, and license their derivative works on different terms,  
36  
37 398 provided the original work is properly cited and the use is non-commercial. See:  
39  
40 399 <http://creativecommons.org/licenses/by-nc/4.0/>  
41  
42

43 400 **Authors' contributions**  
44

45 401 PR screened full-text articles, abstracted and verified data, interpreted results and wrote the  
46  
47 402 manuscript; AR, ND, JA, CW, and NR screened full-text articles, abstracted or verified data, and  
48  
49 403 reviewed the manuscript; BP, GVC, and MG developed and ran the automated search and  
50  
51 404 citation screening process and reviewed the manuscript; MPM reviewed and edited the  
52  
53  
54  
55  
56  
57  
58  
59  
60

1  
2  
3 405 manuscript; SES and ACT developed the protocol, obtained funding, developed review methods,  
4  
5 406 interpreted results, and edited the manuscript.  
6  
7

## 8 407 **Acknowledgements**

9  
10 408 The authors would like to thank Jesse McGowan for her assistance in developing literature  
11  
12 409 searches, Alissa Epworth for her assistance executing searches and retrieving articles, and  
13  
14 410 Krystle Amog and Navjot Mann for their assistance in formatting this manuscript.  
15  
16

## 17 411 **Additional File**

18  
19 412 **File Format:** Microsoft Word (.docx)  
20  
21

22 413 **Title of Data:** Additional File 1 (Appendices 1-6)  
23

24 414 **Description of Data:** The appendices include the following additional information:  
25

26 415 Appendix 1 – PRISMA-ScR checklist  
27

28 416 Appendix 2 – Embase literature search  
29

30 417 Appendix 3 – Interventions of interest  
31

32 418 Appendix 4 – Studies excluded during full-text screening  
33

34 419 Appendix 5 – Detailed study and patient characteristics  
35

36 420 Appendix 6 – Detailed effectiveness and safety results  
37  
38  
39  
40

## 41 421 **FIGURE LEGEND**

42 422 Figure 1. Flow chart of studies included in the review  
43

44 423 Study flow diagram.  
45  
46  
47  
48  
49  
50  
51  
52  
53  
54  
55  
56  
57  
58  
59  
60

## 424 REFERENCES

- 425 1. Novel Coronavirus (2019-nCoV): situation report, 22: World Health Organization; 2020  
426 [updated February 11, 2020; cited 2020 18 August]. Available from:  
427 [https://www.who.int/docs/default-source/coronaviruse/situation-reports/20200211-sitrep-22-ncov.pdf?sfvrsn=fb6d49b1\\_2](https://www.who.int/docs/default-source/coronaviruse/situation-reports/20200211-sitrep-22-ncov.pdf?sfvrsn=fb6d49b1_2) accessed August 18, 2020 2020.
- 429 2. Coronavirus disease 2019 (COVID-19) Situation Report – 101: World Health Organization;  
430 2020 [updated April 30, 2020; cited 2020 18 August]. Available from:  
431 [https://www.who.int/docs/default-source/coronaviruse/situation-reports/20200430-sitrep-101-covid-19.pdf?sfvrsn=2ba4e093\\_2](https://www.who.int/docs/default-source/coronaviruse/situation-reports/20200430-sitrep-101-covid-19.pdf?sfvrsn=2ba4e093_2) accessed August 18 2020.
- 433 3. Dexamethasone in Hospitalized Patients with Covid-19 — Preliminary Report. *N Engl J Med*  
434 2020 doi: 10.1056/NEJMoa2021436
- 435 4. Singh AK, Singh A, Singh R, et al. Hydroxychloroquine in patients with COVID-19: A  
436 Systematic Review and meta-analysis. *Diabetes Metab Syndr* 2020;14(4):589-96. doi:  
437 10.1016/j.dsx.2020.05.017 [published Online First: 2020/05/18]
- 438 5. Sarma P, Kaur H, Kumar H, et al. Virological and clinical cure in COVID-19 patients treated  
439 with hydroxychloroquine: a systematic review and meta-analysis. *J Med Virol* 2020
- 440 6. Chowdhury MS, Rathod J, Gernsheimer J. A Rapid Systematic Review of Clinical Trials  
441 Utilizing Chloroquine and Hydroxychloroquine as a Treatment for COVID-19. *Acad*  
442 *Emerg Med* 2020;27(6):493-504. doi: 10.1111/acem.14005 [published Online First:  
443 2020/05/03]
- 444 7. Singh AK, Singh A, Singh R, et al. Remdesivir in COVID-19: A critical review of  
445 pharmacology, pre-clinical and clinical studies. *Diabetes Metab Syndr* 2020;14(4):641-  
446 48. doi: 10.1016/j.dsx.2020.05.018 [published Online First: 2020/05/20]
- 447 8. Liu W, Zhou P, Chen K, et al. Efficacy and safety of antiviral treatment for COVID-19 from  
448 evidence in studies of SARSCoV-2 and other acute viral infections: a systematic review  
449 and meta-analysis. *CMAJ* 2020
- 450 9. Devasenapathy N, Ye Z, Loeb M, et al. Efficacy and safety of convalescent plasma for severe  
451 COVID-19 based on evidence in other severe respiratory viral infections: a systematic  
452 review and meta-analysis. *CMAJ* 2020
- 453 10. Ye Z, Wang Y, Colunga-Lozano LE, et al. Efficacy and safety of corticosteroids in COVID-  
454 19 based on evidence for COVID-19, other coronavirus infections, influenza,  
455 community-acquired pneumonia and acute respiratory distress syndrome: a systematic  
456 review and meta-analysis. *CMAJ* 2020
- 457 11. Ye Z, Rochwerg B, Wang Y, et al. Treatment of patients with nonsevere and severe  
458 coronavirus disease 2019: an evidence-based guideline. *CMAJ* 2020;192(20):E536-E45.
- 459 12. Therapeutic Options 2020 [updated April 25, 2020; cited 2020 18 August]. Available from:  
460 <https://www.cdc.gov/coronavirus/2019-ncov/hcp/therapeutic-options.html> accessed  
461 August 18 2020.
- 462 13. Clinical management of COVID-19: World Health Organization; 2020 [updated May 27,  
463 2020; cited 2020 18 August]. Available from:  
464 <https://www.who.int/publications/i/item/clinical-management-of-covid-19> accessed  
465 August 18 2020.
- 466 14. JBI Manual for Evidence Synthesis 2020 [cited 2020 18 August]. Available from:  
467 <https://synthesismanual.jbi.global> accessed August 18 2020.

- 1  
2  
3 468 15. Rapid reviews to strengthen health policy and systems: a practical guide World Health  
4 469 Organization; [cited 2020 18 August]. Available from: [https://www.who.int/alliance-  
6 471 hpsr/resources/publications/rapid-review-guide/en/](https://www.who.int/alliance-<br/>5 470 hpsr/resources/publications/rapid-review-guide/en/) accessed 18 August 2020.
- 7 471 16. Rios P, Radhakrishnan A, Antony J, et al. Effectiveness and safety of antiviral or antibody  
8 472 treatments for coronavirus: A rapid review. *medRxiv* 2020:2020.03.19.20039008. doi:  
9 473 10.1101/2020.03.19.20039008
- 10 474 17. Tricco AC, Lillie E, Zarin W, et al. PRISMA Extension for Scoping Reviews (PRISMA-  
11 475 ScR): Checklist and Explanation. *Ann Intern Med* 2018;169(7):467-73. doi:  
12 476 10.7326/m18-0850 [published Online First: 2018/09/05]
- 13 477 18. Cormack GV, Grossman MR. Technology-Assisted Review in Empirical Medicine:  
14 478 Waterloo Participation in CLEF eHealth 2018 2018 [cited 2020 18 August]. Available  
15 479 from: [http://ceur-ws.org/Vol-2125/paper\\_89.pdf](http://ceur-ws.org/Vol-2125/paper_89.pdf) accessed 18 August 2020.
- 16 479 19. Wang Y, Zhang D, Du G, et al. Remdesivir in adults with severe COVID-19: a randomised,  
17 480 double-blind, placebo-controlled, multicentre trial. *Lancet* 2020;395(10236):1569-78.  
18 481 doi: 10.1016/S0140-6736(20)31022-9 [published Online First: 04/29]
- 19 482 20. Chen C, Huang J, Cheng Z, et al. Favipiravir versus arbidol for COVID-19: a randomized  
20 483 clinical trial. *medRxiv* 2020
- 21 484 21. Li Y, Xie Z, Lin W, et al. An exploratory randomized, controlled study on the efficacy and  
22 485 safety of lopinavir/ritonavir or arbidol treating adult patients hospitalized with  
23 486 mild/moderate COVID-19 (ELACOI). *medRxiv* 2020
- 24 487 22. Hung IF-N, Lung K-C, Tso EY-K, et al. Triple combination of interferon beta-1b, lopinavir-  
25 488 ritonavir, and ribavirin in the treatment of patients admitted to hospital with COVID-19:  
26 489 an open-label, randomised, phase 2 trial. *Lancet* 2020;395(10238):1695-704.
- 27 490 23. Deng L, Li C, Zeng Q, et al. Arbidol combined with LPV/r versus LPV/r alone against  
28 491 Corona Virus Disease 2019: A retrospective cohort study. *J Infect* 2020
- 29 492 24. Kim MS, Jang S-W, Park Y-K, et al. Treatment Response to Hydroxychloroquine,  
30 493 Lopinavir/Ritonavir, and Antibiotics for Moderate COVID 19: A First Report on the  
31 494 Pharmacological Outcomes from South Korea. *medRxiv* 2020
- 32 495 25. Lan X, Shao C, Zeng X, et al. Lopinavir-ritonavir alone or combined with arbidol in the  
33 496 treatment of 73 hospitalized patients with COVID-19: a pilot retrospective study.  
34 497 *medRxiv* 2020
- 35 498 26. Lian N, Xie H, Lin S, et al. Umifenovir treatment is not associated with improved outcomes  
36 499 in patients with coronavirus disease 2019: a retrospective study. *Clin Microbiol Infect*  
37 500 2020
- 38 501 27. Lu X, Chen T, Wang Y, et al. Adjuvant corticosteroid therapy for critically ill patients with  
39 502 COVID-19. *Crit Care* 2020;24(1):241. doi: 10.1186/s13054-020-02964-w [published  
40 503 Online First: 2020/05/21]
- 41 504 28. Wang Y, Jiang W, He Q, et al. Early, low-dose and short-term application of corticosteroid  
42 505 treatment in patients with severe COVID-19 pneumonia: single-center experience from  
43 506 Wuhan, China. *medRxiv* 2020
- 44 507 29. Zhu Z, Lu Z, Xu T, et al. Arbidol monotherapy is superior to lopinavir/ritonavir in treating  
45 508 COVID-19. *J Infect* 2020;81(1):e21-e23.
- 46 509 30. Borba MGS, Val FFA, Sampaio VS, et al. Effect of high vs low doses of chloroquine  
47 510 diphosphate as adjunctive therapy for patients hospitalized with severe acute respiratory  
48 511 syndrome coronavirus 2 (SARS-CoV-2) infection: a randomized clinical trial. *JAMA*  
49 512 *Netw Open* 2020;3(4):e208857-e57.
- 50 513

- 1  
2  
3 514 31. Chen Z, Hu J, Zhang Z, et al. Efficacy of hydroxychloroquine in patients with COVID-19:  
4 515 results of a randomized clinical trial. *medRxiv* 2020  
5 516 32. Tang W, Cao Z, Han M, et al. Hydroxychloroquine in patients with mainly mild to moderate  
6 517 coronavirus disease 2019: open label, randomised controlled trial. *BMJ* 2020;369  
7 518 33. Magagnoli J, Narendran S, Pereira F, et al. Outcomes of hydroxychloroquine usage in United  
8 519 States veterans hospitalized with Covid-19. *medRxiv* 2020 doi:  
9 520 10.1101/2020.04.16.20065920 [published Online First: 2020/06/09]  
10 521 34. Mahevas M, Tran V-T, Roumier M, et al. No evidence of clinical efficacy of  
11 522 hydroxychloroquine in patients hospitalized for COVID-19 infection with oxygen  
12 523 requirement: results of a study using routinely collected data to emulate a target trial.  
13 524 *medRxiv* 2020  
14 525 35. Mercurio NJ, Yen CF, Shim DJ, et al. Risk of QT interval prolongation associated with use of  
15 526 hydroxychloroquine with or without concomitant azithromycin among hospitalized  
16 527 patients testing positive for coronavirus disease 2019 (COVID-19). *JAMA Cardiol* 2020  
17 528 36. Rosenberg ES, Dufort EM, Udo T, et al. Association of treatment with hydroxychloroquine  
18 529 or azithromycin with in-hospital mortality in patients with COVID-19 in New York state.  
19 530 *JAMA* 2020  
20 531 37. Singh S, Khan A, Chowdhry M, et al. Outcomes of Hydroxychloroquine Treatment Among  
21 532 Hospitalized COVID-19 Patients in the United States-Real-World Evidence From a  
22 533 Federated Electronic Medical Record Network. *medRxiv* 2020  
23 534 38. Yu B, Wang DW, Li C. Hydroxychloroquine application is associated with a decreased  
24 535 mortality in critically ill patients with COVID-19. *medRxiv* 2020  
25 536 39. Wu J, Huang J, Zhu G, et al. Systemic corticosteroids show no benefit in severe and critical  
26 537 COVID-19 patients in Wuhan, China: A retrospective cohort study. *medRxiv* 2020  
27 538 40. Zha L, Li S, Pan L, et al. Corticosteroid treatment of patients with coronavirus disease 2019  
28 539 (COVID-19). *Med J Aust* 2020;212(9):416-20.  
29 540 41. Fadel R, Morrison A, Vahia A, et al. Early Short Course Corticosteroids in Hospitalized  
30 541 Patients with COVID-19. *medRxiv* 2020  
31 542 42. Bian H, Zheng Z-H, Wei D, et al. Meplazumab treats COVID-19 pneumonia: an open-  
32 543 labelled, concurrent controlled add-on clinical trial. *medRxiv* 2020  
33 544 43. Wadud N, Ahmed N, Shergil MM, et al. Improved survival outcome in SARs-CoV-2  
34 545 (COVID-19) Acute Respiratory Distress Syndrome patients with Tocilizumab  
35 546 administration. *medRxiv* 2020  
36 547 44. Shao Z, Feng Y, Zhong L, et al. Clinical Efficacy of Intravenous Immunoglobulin Therapy in  
37 548 Critical Patients with COVID-19: A multicenter retrospective cohort study. 2020  
38 549 45. Estebanez M, Ramirez-Olivencia G, Mata T, et al. Clinical evaluation of IFN beta1b in  
39 550 COVID-19 pneumonia: a retrospective study. *medRxiv* 2020  
40 551 46. Zeng Q-L, Yu Z-J, Gou J-J, et al. Effect of convalescent plasma therapy on viral shedding  
41 552 and survival in patients with coronavirus disease 2019. *J Infect Dis* 2020;222(1):38-43.  
42  
43  
44  
45  
46  
47  
48  
49  
50  
51  
52  
53  
54  
55  
56  
57  
58  
59  
60



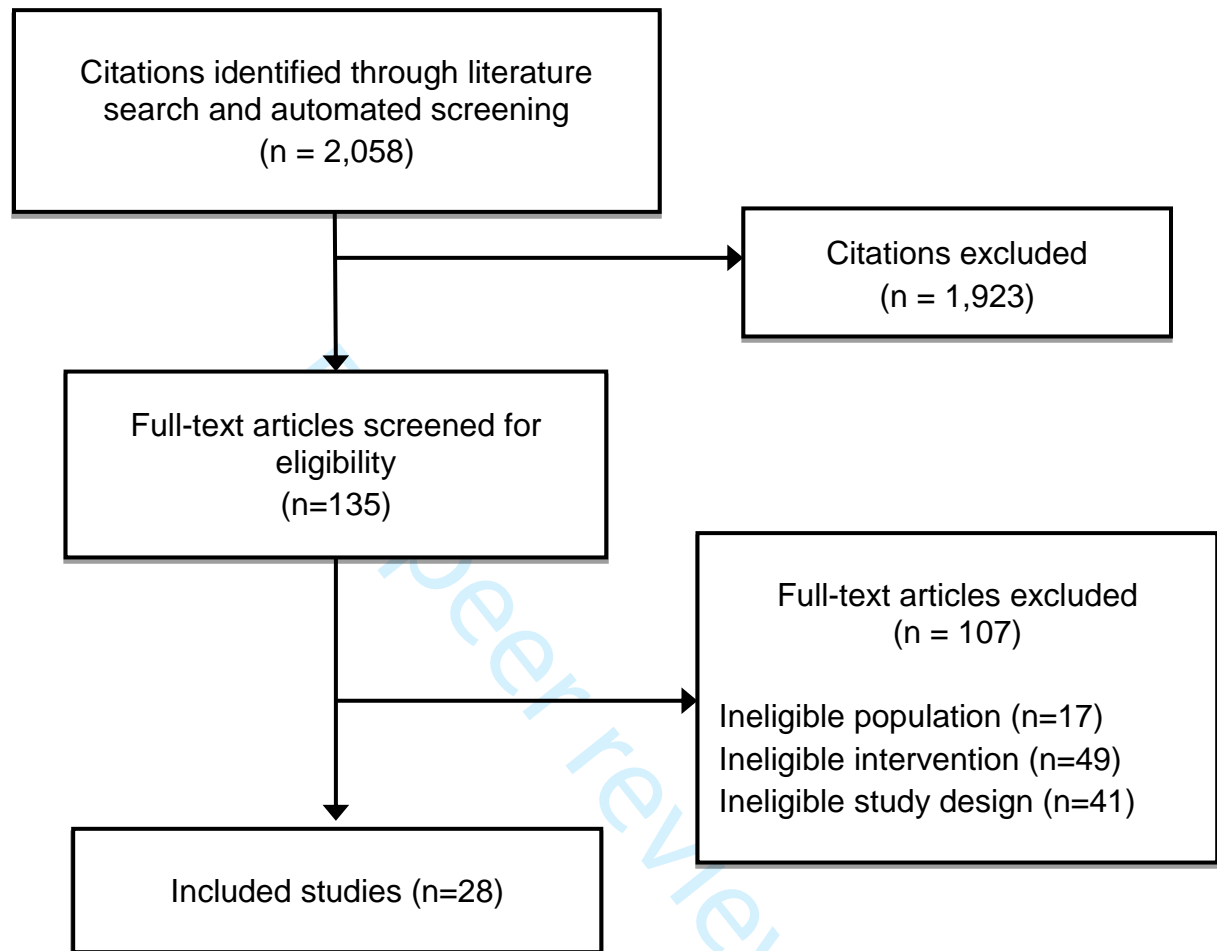

## Appendix 1 – PRISMA ScR checklist

| SECTION                                  | ITEM | PRISMA-ScR CHECKLIST ITEM                                                                                                                                                                                                                                                                                  | REPORTED ON PAGE # |
|------------------------------------------|------|------------------------------------------------------------------------------------------------------------------------------------------------------------------------------------------------------------------------------------------------------------------------------------------------------------|--------------------|
| <b>TITLE</b>                             |      |                                                                                                                                                                                                                                                                                                            |                    |
| <b>Title</b>                             | 1    | Identify the report as a scoping review.                                                                                                                                                                                                                                                                   | 1                  |
| <b>ABSTRACT</b>                          |      |                                                                                                                                                                                                                                                                                                            |                    |
| <b>Structured summary</b>                | 2    | Provide a structured summary that includes (as applicable): background, objectives, eligibility criteria, sources of evidence, charting methods, results, and conclusions that relate to the review questions and objectives.                                                                              | 2                  |
| <b>INTRODUCTION</b>                      |      |                                                                                                                                                                                                                                                                                                            |                    |
| <b>Rationale</b>                         | 3    | Describe the rationale for the review in the context of what is already known. Explain why the review questions/objectives lend themselves to a scoping review approach.                                                                                                                                   | 3                  |
| <b>Objectives</b>                        | 4    | Provide an explicit statement of the questions and objectives being addressed with reference to their key elements (e.g., population or participants, concepts, and context) or other relevant key elements used to conceptualize the review questions and/or objectives.                                  | 3                  |
| <b>METHODS</b>                           |      |                                                                                                                                                                                                                                                                                                            |                    |
| <b>Protocol and registration</b>         | 5    | Indicate whether a review protocol exists; state if and where it can be accessed (e.g., a Web address); and if available, provide registration information, including the registration number.                                                                                                             | 3                  |
| <b>Eligibility criteria</b>              | 6    | Specify characteristics of the sources of evidence used as eligibility criteria (e.g., years considered, language, and publication status), and provide a rationale.                                                                                                                                       | 4-5                |
| <b>Information sources*</b>              | 7    | Describe all information sources in the search (e.g., databases with dates of coverage and contact with authors to identify additional sources), as well as the date the most recent search was executed.                                                                                                  | 4                  |
| <b>Search</b>                            | 8    | Present the full electronic search strategy for at least 1 database, including any limits used, such that it could be repeated.                                                                                                                                                                            | 4, Appendix 2      |
| <b>Selection of sources of evidence†</b> | 9    | State the process for selecting sources of evidence (i.e., screening and eligibility) included in the scoping review.                                                                                                                                                                                      | 5-6                |
| <b>Data charting process‡</b>            | 10   | Describe the methods of charting data from the included sources of evidence (e.g., calibrated forms or forms that have been tested by the team before their use, and whether data charting was done independently or in duplicate) and any processes for obtaining and confirming data from investigators. | 6                  |
| <b>Data items</b>                        | 11   | List and define all variables for which data were sought and any assumptions and simplifications made.                                                                                                                                                                                                     | 6                  |

|                                                                         |    |                                                                                                                                                                                                       |                           |
|-------------------------------------------------------------------------|----|-------------------------------------------------------------------------------------------------------------------------------------------------------------------------------------------------------|---------------------------|
| <b>Critical appraisal of individual sources of evidence<sup>§</sup></b> | 12 | If done, provide a rationale for conducting a critical appraisal of included sources of evidence; describe the methods used and how this information was used in any data synthesis (if appropriate). | N/A                       |
| <b>Synthesis of results</b>                                             | 13 | Describe the methods of handling and summarizing the data that were charted.                                                                                                                          | 6                         |
| <b>RESULTS</b>                                                          |    |                                                                                                                                                                                                       |                           |
| <b>Selection of sources of evidence</b>                                 | 14 | Give numbers of sources of evidence screened, assessed for eligibility, and included in the review, with reasons for exclusions at each stage, ideally using a flow diagram.                          | 7, Figure 1, Appendix 4   |
| <b>Characteristics of sources of evidence</b>                           | 15 | For each source of evidence, present characteristics for which data were charted and provide the citations.                                                                                           | 8-9, Table 1, Appendix 3  |
| <b>Critical appraisal within sources of evidence</b>                    | 16 | If done, present data on critical appraisal of included sources of evidence (see item 12).                                                                                                            | N/A                       |
| <b>Results of individual sources of evidence</b>                        | 17 | For each included source of evidence, present the relevant data that were charted that relate to the review questions and objectives.                                                                 | 9-14, Table 2, Appendix 5 |
| <b>Synthesis of results</b>                                             | 18 | Summarize and/or present the charting results as they relate to the review questions and objectives.                                                                                                  | 9-14, Table 2             |
| <b>DISCUSSION</b>                                                       |    |                                                                                                                                                                                                       |                           |
| <b>Summary of evidence</b>                                              | 19 | Summarize the main results (including an overview of concepts, themes, and types of evidence available), link to the review questions and objectives, and consider the relevance to key groups.       | 17, Table 2               |
| <b>Limitations</b>                                                      | 20 | Discuss the limitations of the scoping review process.                                                                                                                                                | 17-18                     |
| <b>Conclusions</b>                                                      | 21 | Provide a general interpretation of the results with respect to the review questions and objectives, as well as potential implications and/or next steps.                                             | 17-18                     |
| <b>FUNDING</b>                                                          |    |                                                                                                                                                                                                       |                           |
| <b>Funding</b>                                                          | 22 | Describe sources of funding for the included sources of evidence, as well as sources of funding for the scoping review. Describe the role of the funders of the scoping review.                       | 20                        |

JB1 = Joanna Briggs Institute; PRISMA-ScR = Preferred Reporting Items for Systematic reviews and Meta-Analyses extension for Scoping Reviews.

\* Where sources of evidence (see second footnote) are compiled from, such as bibliographic databases, social media platforms, and Web sites.

† A more inclusive/heterogeneous term used to account for the different types of evidence or data sources (e.g., quantitative and/or qualitative research, expert opinion, and policy documents) that may be eligible in a scoping review as opposed to only studies. This is not to be confused with information sources (see first footnote).

‡ The frameworks by Arksey and O'Malley (6) and Levac and colleagues (7) and the JBI guidance (4, 5) refer to the process of data extraction in a scoping review as data charting.

§ The process of systematically examining research evidence to assess its validity, results, and relevance before using it to inform a decision. This term is used for items 12 and 19 instead of "risk of bias" (which is more applicable to systematic reviews of interventions) to include and acknowledge the various sources of evidence that may be used in a scoping review (e.g., quantitative and/or qualitative research, expert opinion, and policy document).

## Appendix 2 – Embase literature search

Database: Embase <1974 to 2020 May 01>

Search Strategy:

- 
- 1 exp coronaviridae/ or exp Coronaviridae infection/ or exp Coronavirus infection/ or SARS coronavirus/
  - 2 ((wuhan or hubei or huanan) and (severe acute respiratory or pneumonia\* or virus\*) and outbreak\*).mp.
  - 3 (coronavir\* or "corona virus\*" or "coronavirus pneumonia" or betacoronavir\* or COVID or COVID-19).mp.
  - 4 ("nCoV" or "cov 2" or cov2 or 2019ncov or 2019-nCoV or "2019 ncov" or "2019-ncov" or "2019 novel cov" or "2019 ncov disease\*" or "2019 novel coronavirus\*").mp.
  - 5 ("severe acute respiratory syndrome coronavirus\*" or "wuhan virus\*" or "sars cov 2 mers" or "middle east respiratory syndrome\*" or "Severe Acute Respiratory" or SARS or SARS-CoV or SARS-CoV2 or MERS-CoV).mp.
  - 6 or/1-5
  - 7 exp Interferons/ or interleukin-2/ or exp Immunoglobulin/ or anakinra/ or Sarilumab/ or Siltuximab/ or tumor necrosis factor/ or granulocyte macrophage colony stimulating factor/ or beta1a interferon/ or interferon beta serine/
  - 8 (interferon\* or "Interferon-alpha" or "Interferon-beta" or "avonex" or "interferon beta-1a" or "Betaseron" or "Extavia" or "betaferon" or "beneseron" or "beta 1-b interferon" or "recombinant interferon beta-1b" or "Rebif" or "Interferon-gamma" or immunoglobulin\* or "immuno globulin\*" or "immune-globulin\*" or anakinra or kineret or Sarilumab or kevsara or regn88 or sar153191 or Siltuximab or sylvant or cnto328 or "cnto 328" or "tumor necrosis factor\*" or "tumor necrosis serum\*" or cachectin or cachetin or "anti-TNF-alpha" or "TNF alfa" or "TNF alpha" or anti-granulocyte macrophage or anti-GM-CSF or "GM CSF" or gmcsf or Flebogamma or Gamunex or "Globulin-N" or "Globulin N" or Intraglobin Gammagard or Gamimune or Gamimmune or Privigen or Sandoglobulin or Venoglobulin or "Venoglobulin-I" or "Venoglobulin I" or Venimmune or Iveegam or Alphaglobin or Endobulin or "Gamimmune N" or "Gamimmune N" or Gammonativ or beriglobin or biggam or carimune or cuvitrु or gammagen or gammplex or gamunex or hizentra or kiovig or norga or panzyga or sandoglobulin\* or subcuvia or venogamma or vigan or interleukin-2 or interleukin).tw.
  - 9 umifenovir/ or riamilovir/ or favipiravir/ or sofosbuvir/ or Arbidol/ or Galidesivir/
  - 10 (Favipiravir or Triazavirin or Umifenovir or riamilovir or sofosbuvir or sofosbuvir or sovaldi or psi7851 or psi7976 or psi7977 or "EIDD-2801" or "EIDD 2801" or arbidol or Galidesivir or "immucillin A bcx4430" or "bcx 4430").tw.
  - 11 Darunavir/ or Lopinavir/ or Ritonavir/ or danoprevir/ or remdesivir/
  - 12 (ASC09 or Azvudine or Danoprevir or Darunavir or Lopinavir or ritonavir or Remdesivir or "gs 5734" or "gs5734" or prezista or "tmc 114" or tmc114 or "uic 94017" or uic94017 or abt378 or norvir).tw.
  - 13 baloxavir marboxil/ or baloxavir marboxil.tw.

- 1  
2  
3 14 exp antimalarial agent/ or exp quinoline derivative/  
4  
5 15 (Amodiaquine or Basoquin or Camoquin or Flavoquine or Chloroquine or Resochin or  
6 Dawaquin or Lariago or Aarlen or Hydroxychloroquine or Hydroxy-chloroquine or chloroquinol  
7 or hydrochloroquine or hydrochloroquine or oxychloroquine or quensyl or "sn 8137" or ercoquin  
8 or Plaquenil or Hydroquin or Axemal or Dolquine or Quensyl or Quinoric or Imiquimiod or  
9 Aldara or Vyloma or Zyclara or Primaquine or Jasoprim or Malirid or Neo-Quipenyl or  
10 Pimaquin or Pmq or Primachina or Primacin or Primaquina or Primaquine or Primaquine or  
11 Remaquin or Tafenoquine or Krinfatel or Kozenis or Arakoda or Krintafel or Pamaquine or  
12 Plasmochin or Plasmoqueine or Plsamaguine or Neo-Quipenyl or Primachin or  
13 Dihydroartemisinin or Mefloquine or lariam or laricam or mefliam or mephaquin\* or tropicur or  
14 Nitazoxanide or Alinia or colufase or daxon or heliton or "salicylamide acetate" or nodik or "ph  
15 5776" or ph5776 or ambilhar or "ba 32644" or ba32644 or "ciba 32644 ba" or "ciba 32644ba" or  
16 ciba32644ba or niradazol\* or nitrothiamidazol\* or nitrothiazole or "nsc 136947" or nsc136947 or  
17 yarocen or Nitrothiazole or Amokin or amokine or anoclor or aralan or aralen or arechin or  
18 arechine or arequine or arthrochin or arthrochine or arthroquine or artrichin or artrichine or  
19 artriquine or avloclor or bemaphata or bemaphate or bemasulph or bipiquin or cadiquin or  
20 chemochin or chemochine or chingamine or chingaminum or chloraquine or chlorochin or  
21 chlorochine or chlorofoz or chloroquin or chloroquin\* or cidanchin or "clo-kit junior" or  
22 clorichina or clorichine or cloriquine or clorochina or delagil or delagyl or dichinalex or diclokin  
23 or diquinalex or diroquine or emquin or genocin or gontochin or gontochine or gontoquine or  
24 heliopar or imagon or iroquine or klorokin or klorokine or klorokinfosfat or lagaquin or malaquin  
25 or malarex or malarivon or malaviron or maliaquine or maquine or mesylith or mexaquin or  
26 mirquin or nivachine or nivaquin\* or roquine or quinachl or quingamine or repal or resoche\* or  
27 resochein or resoquina or resoquine or reumachlor or  
28 roquine or rp3377 or sanoquin or sanoquine or silbesan or siragan or sirajan or sn7618 or  
29 solprina or solprine or tresochin or tresochine or tresoquine or trochin or trochine or troquine).tw.  
30  
31  
32  
33 16 suramin/  
34  
35 17 (Carriomycin or Suramin).tw.  
36  
37 18 exp steroid/ or exp meprednisone/ or exp corticosteroid/ or fingolimod/ or leflunomide/ or  
38 thalidomide/  
39  
40 19 (steroid\* or methylprednisone or meprednisone or Prednisolone or Fluprednisolone or  
41 Corticosteroid\* or Fingolimod or Leflunomid\* or Thalidomid\*).tw.  
42  
43 20 ruxolitinib/  
44  
45 21 (Jakotinib or Ruxolitinib).tw.  
46  
47 22 exp monoclonal antibody/  
48  
49 23 (Ruxolitinib or Tocilizumab or Adalimumab or Camrelizumab or Eculizumab or  
50 Mepolizumab or "PD-1 mAb" or Tocilizumab or Adamumab or tozumab or meplazumab or  
51 monoclonal antibody\*).tw.  
52  
53 24 ("SARS-Cov-2 specific neutralizing antibod\*" or "SARS-Cov specific neutralizing  
54 antibod\*" or "MERS-Cov specific neutralizing antibod\*" or "Anti C5a monoclonal  
55 antibod\*").tw.  
56  
57  
58  
59  
60

- 1  
2  
3 25 acetylcysteine/ or exp angiotensin receptor antagonist/ or exp angiotensin derivative/ or exp  
4 dipeptidyl carboxypeptidase inhibitor/ or citrate potassium/ or glycyrrhizic acid/ or dipyridamole/  
5 or hydrogen peroxide/ or polyinosinic polycytidylic acid/ or thymosin/ or ascorbic acid/  
6  
7 26 (Acetylcysteine or Angiotensin or Angiotensin or "ACE inhibitor\*" or ACE-2 or  
8 "Angiotensin II receptor blocker\*" or ARBs or "potassium citrate" or Bromhexine or  
9 "Diammonium glycyrrhizinate" or Glycyrrhizic or Dipyridamole or Ebastine or "Hydrogen  
10 peroxide" or Pirfenidone or Polyinosinic-polycytidylic or "Polyinosinic-polycytidylic" or "Poly  
11 I-C" or "rhG-CSF" or Thymosin\* or Tranilast or "Vitamin C" or "Ascorbic Acid\*").tw.  
12  
13 27 ("inhal\*" adj2 gas\*).tw.  
14  
15 28 Cyclosporine/  
16  
17 29 (Cyclosporin or cequa or "cgc 1072" or "cgc1072" or ciclomulsion or cyclasol or de076 or  
18 deximune or implanta or imusporin or neuro-stat or neurostat or opsisporin or "otx 101" or  
19 padciclo or papilock or "sp 14019" or verkazia).tw.  
20  
21 30 Fenretinide/  
22  
23 31 (fenretinide or "mcn r 1967" or "4 hydroxyphenylretinamide" or Ifendopril).tw.  
24  
25 32 Dalteparin/ or enoxaparin/ or tinzaparin/ or fondaparinux/ or edoxaban/ or rivaroxaban/ or  
26 apixaban/ or betrixaban/ or heparin/ or danaparoid/ or warfarin/ or dabigatran.hw.  
27  
28 33 (dalteparin or fragmin\* or "low liquemin" or enoxaparin or clexan or clexane or inhixa or  
29 lexane or lovenox or neoparin or neoparin-nx or thorinane or tinzaparin or innohep or logiparin  
30 or fondaparinux or quixidar or dabigatran or edoxaban or lixiana or roteas or savaysa or  
31 rivaroxaban or xarelto or "bay 59 7939" or apixaban or eliques or eliquis or warfarin or adoisine  
32 or carfin or coumadan or coumadin\* or marevan or panwarfarin or panwarfin or sofarin or  
33 warnerin or betrixaban or bevyxxa or dextience or heparin or Disebrin or hepalean or lipo-hepin  
34 or menaven or multiparin or nevparin or panheparin or panheprin or praecivenin or  
35 thrombareduct or thromboliquine or vetren or danaparoid or lomoparan or orgaran).tw.  
36  
37 34 (Azilsartan or candesartan or eprosartan or Irbesartan or telmisartan or valsartan or losartan  
38 or olmesartan).hw. or cobicistat/ or losartan/  
39  
40 35 (Azilsartan or Edarbi or "tak 536" or tak536 or candesartan or amcandin or amlodipine or  
41 amlopres or camlostas or candam or candeamio or candezek or caramlo or framsyl or unisia or  
42 zenicamo or Atacand or eprosartan or epratenz or futuran or naviten or navixen or regulaten or  
43 "skf 108566" or "skf108566" or tevesten or tevetan or teveten or tevetenz or Irbesartan or  
44 irbertan or Avapro or telmisartan or approvel or aprovel or "arbez lr" or avapro or ifirmasta or  
45 irban or irbetan or iretensa or irovel or irvell or karvea or saberverel or Micardis or valsartan or  
46 Diovan\* or Prexxartan or saval or losartan or Cozaar or entrizen or lavestra or lorista or  
47 Olmesartan or Benicar or sarten or entresto or sacubitril or valsartan or byvalson or nebivolol or  
48 Aviptadil or Losartan or cozaar or cobicistat or tybost or actelsar or kinzal mono or kinzalmono  
49 or micardis or predxal or pritor or pritoral or semintra or telma-20 or tolura or angiosan or  
50 cordinate or dalzad ordiovan or diovine or kalpress or miten or nisis or prexxartan or provas or  
51 rixil or saval or tareg or tazea or troval or valpression or vals or valsocard or valtán or valtsu or  
52 alteis or belsar or benetor or benevas or benicar or cs866 or ixia or laresin or mencord or mesar  
53 or olartan or olmeblo or olmec or olmes or Olmesartan or olmetec or olpresor olsar or omesar or  
54 openvas or plaunac or rnh6270 or santini or sarten or tensar or tensiol or vivactra or votum or  
55 byvalson or cozaar).tw.  
56  
57  
58  
59  
60

1  
2  
3 36 (benazepril or Captopril or Cilazapril or Enalapril or Fosinopril or Lisinopril or Perindopril  
4 Quinapril or Ramipril or Trandolapril).hw.  
5

6 37 (Benazepril or Lotensin or Captopril or Benace or boncordin or briem or brien or "cgs  
7 148241" or "cgs 14824a" or "cgs148241" or "cgs14824a" or cibace or cibacen\* or fortekor or  
8 lotensin or tenkuoren or zinadril or ace-bloc or acenorm or acepress or acepril or aceprilex or  
9 aceril or aceten or adocor or alopresin or altran or apuzin or asisten or capace or capocard or  
10 caposan or capoten\* capotril or capril or captace or captensin or capti or captoflux or captohexal  
11 or captolane or captomax or capton or captopren or captoprilan or captoril or captral or cardiopril  
12 or cardipril or catona or catoplin or catopril or cesplon or cryopril or debax or dexacap or dextro  
13 captopril or ecapres or ecaten or epicordin or epsitron or farcopril or farmoten or hiperil or  
14 hypopress or hypotensor or insucar or iopril or isopresol or katopil or ketanine or keyerpril or  
15 lapril or locap or lopirin or lopril or medepres or midrat or minitent or nolectin or "oltens ge" or  
16 petacilon or praten or primace or rilcapton or ropril or smarten or tenofax or tensicap tensiomen  
17 or tensiomin or tensobon or tensoprel or tensoril or tenzib or topace or toprilem or typril-ace or  
18 vasosta or zapto or orkaptil or Cilazapril or dynorm or inhibace or inibace or initiss or inocar).tw.  
19  
20

21 38 (justor or vascace or Enalapril or Vasotec or bpnorm or dynacil or eliten or fosenopril or  
22 fosinil or fosinonorm or fosinopril or fosinorm or fosipres or fositen or fositens or fovas or  
23 fozitec or monopril or newace or sapril or sq28555 or staril or vasopril or acerbon or alapril or  
24 alfaken or carace or cipril or coric or dapril or fibsol or inopril or linopril or linvas or lipril or lisi  
25 abz orlisibeta or lisigamma or lsihexal or lisinopril dihydrate or lisipril or lisodur or lisopress or  
26 lisopril orlisoril or lispril or listril or lysinopril or "mk 0521" or "mk 521" or "mk 522" or  
27 "mk0521 or mk521" or "mk522" or noperten or novatec or presiten or prinil or prinivil or qbreilis  
28 or sinopril or tensopril or tensyn or vivatec or zestomax or zestril or Monopri or Lisinopril or  
29 Prinivil or Zestril or Perindopril or Coversyl or Quinapril or Accupril or accuprin or accupro or  
30 accupron or acequin or acuitel or acuprel or acupril or asig or "ci906" or conan or ectren or korec  
31 or quinalapril or quinateen or quinazi or quinhexal or quinipril or Ramipril or acovil or altace or  
32 carasel or cardace or corpril or delix or "hoe 498" or hypren or hytren or lostapres or ramace or  
33 ramilich or triatec or tritace or unipril or vesdil or vivace or Altace or Trandolapril or Mavik or  
34 gopten or Odace or odric or udrik).tw.  
35  
36

37 39 Colistin/ or (Teicoplanin or Ivermectin or azithromycin).hw.  
38

39 40 (Colistin or belcomycin or colimycin\* or belcomycin or Colicort or colimycin or colistine  
40 or colomycin or coly mycin or colymycin or multimycin or polymyxin or Teicoplanin or planium  
41 or tagocid or talinac or tapocin or targocid or targoplanin or targosid or teichomycin or  
42 teichoplanin or teichoplanine or teicomid or teicopix or teiplamil or Planium or Tagocid or  
43 talinac or tapocin or targocid or targoplanin or targosid or teichomycin or teichomycin or  
44 teichoplanin\* or teicomid or teicopix or teiplamil or Ivermectin or Avermectin or cardomec or  
45 diapec or efecti or epimekor or eqvalan or eqvalenor or ivermectina or ivermectol or ivexterm or  
46 ivomec or mectizan or "mk 933" or "mk933" or oramec or quanox or revectina or securo or  
47 skllice or soolantra or stromectol or azithromycin or aruzilina or atizor or azadose or azasite or  
48 azatril or azenil or azibiot or azimin or azithral or azithromycin or azitrocine or azitromax  
49 azitromicin\* or aziwok or azomyne or aztrin or azydrop or azyter or azithromycin or bazyt or "cp  
50 62933" or "cp 62993" or "cp62933" or "cp62993" or erythromycin or Forcin or Inedol or  
51 infectoazit or "isv 401" or "isv401" or kromicin or macrozit or mezatrin or octavax or ordipha or  
52 ribotrex or sumamed or tobyl or tromix or trozocina or ultreon or vinzam or xithrone or "xz 450"  
53  
54  
55  
56  
57  
58  
59

1  
2  
3 or "xz450" or Zaret or Zarom or zetamax or zeto or zibramax or zifin or zimericina or zistic or  
4 zithromax or zithrox or zitinn or zitrim or zitrobifan or zitrocin or zitromax or zmax).tw. (63618)

5  
6 41 Tamoxifen.hw. or dasatinib/ or Epirubicin/ or Gemcitabine/ or Homoharringtonin/ or  
7 Imatinib/ or toremifene/ or Valrubicin/

8  
9 42 (dasatinib or Ellence or Epirubicin\* or epid or epifil or epiham or epilem or epirubicine or  
10 farmorrubicina or farmorubicin or pharmorubicin or Gemcitabine or difluorodeoxycytidine or  
11 Gemcite or gemtro or gemzar or infugem or "ly188011" or Homoharringtonine or harringtonine  
12 or omacetaxine or ceftalonin or omapro or synribo or Imatinib or "cgp 57148" or "cgp57148b" or  
13 gleevac or gleevec or glivec or glivic or ruvise or Tamoxifen or ebefen or kessar or tamoplac or  
14 tamoxasta or tamoxifene or toremifene or estrimex or fareston or fc1157a or Valrubicin or  
15 valstar or valtaxin).tw.

16  
17 43 Disulfiram/ or Emetine/ or Clomipramine/ or Loperamide/ or Caspofungin/ or Terconazole/  
18 or Colchicine/ or Promethazine/ or Azelastine/ or Aprepitant/ or Chlorpromazine/ or Icatibant/ or  
19 Bepotastine/ or prostacyclin/ or Vapreotide/ or Conivaptan/ or Nitric oxide/ or (Perphenazine or  
20 Metformin).hw.

21  
22 44 (Disulfiram or antabus or Antabuse or esperal or disulfizam or Emetine or Emetin or  
23 Clomipramine or Anafranil or anafranilin or anafranil or clomicalm or hydiphen or Loperamide  
24 or immodium or Caspofungin or Cancidas or Terconazole or fungistat or terazol or "r 42470or  
25 Colchicine" or colchysat or mitigare or "nsc 757" or Promethazine or allerfen or antiallersin or  
26 atosil or fenegan or hiberna or Phenergan or Pipolphen or Prothazine or Romergan or Sayomol  
27 or Azelastine or Astelin or "a5610 or afluon" or alerdual or alergodil or allergodrop or  
28 allergospray or allespray or allestin or astepro or azedil or azelamed or azelavision or azep or  
29 azeptin or carelastin or corifina or "e 0659" or "e0659" or lasticom or lastin or lastinaz or loxin  
30 or oculastin or optivar or pollival or proallergodil or radethacin or radethazin or rhinolast or  
31 rinelaz or tebarat or visuzel or vividrin or vivispray or Aprepitant or cinvanti or emend or  
32 aprepitant or "I754030" or "mk 0869" or "ono7436").tw.

33  
34 45 (Perphenazine or decentan or etaperazine or ethaperazine or "sch 3940" or thilatazin or  
35 tranquisan or trifalon or trilafan or trilafon or trilifan or triliphan or Chlorpromazine or hibernal  
36 or contomin or largactil or megaphen or neurazine or plegomazin or promacid or promapar or  
37 propaphenin or solidon or sonazine or taroctil or "thor prom" or thorazine or vegetamin or  
38 zuledin or Icatibant or firazyr or Metformin or diabetosan or diabex or dianben or diformin or  
39 fluamine or flumamine or fortamet or glifage or gliguanid or glucoformin or gluconil or  
40 glucophage or glucophage-mite or glucostop or glukophage or glumetza or haurymellin or  
41 meguan or merckformin or metforal or metformax or metiguanide or riomet or risidon or siofor  
42 or Bepotastine or bepreve or talion or Epoprostenol or prostacyclin or caripul or cycloprostin or  
43 epoprostenol or flolan or Vapreotide or doctrised or octastatin or Conivaptan or vaprisol or  
44 "Nitric oxide" or inomax or noxivent).tw.

45  
46 46 (convalescence/ and plasma transfusion/) or (Convalesc\* adj2 plasma).tw.

47  
48 47 Natural killer cell/ or exp mesenchymal stem cell/

49  
50 48 ("Recombinant human ACE-2" or "APN0" or "Natural killer cell" or "natural killer cells"  
51 or "NK cell" or "NK cells" or mesenchymal).tw.

52  
53 49 Arbidol/ or Galidesivir/

54  
55 50 (arbidol or Galidesivir or "immucillin A bcx4430" or "bcx 4430").tw.



1  
2  
3 51 n methyl dextro aspartic acid receptor blocking agent/  
4

5 52 ("n methyl dextro aspartic acid receptor" or "n methyl d aspartate a" or " NMDA  
6 antagonist\*" or " NMDA inhibitor\*" or " NMDA block\*" or " NMDA receptor\*").tw.

7 53 or/7-52  
8

9 54 6 and 53

10 55 exp experimental organism/ or animal tissue/ or animal cell/ or exp animal disease/ or exp  
11 carnivore disease/ or exp bird/ or exp experimental animal welfare/ or exp animal husbandry/ or  
12 animal behavior/ or exp animal cell culture/ or exp mammalian disease/ or exp mammal/ or exp  
13 marine species/ or nonhuman/ or animal.hw.  
14

15 56 55 not human/  
16

17 57 54 not 56  
18  
19  
20  
21  
22  
23  
24  
25  
26  
27  
28  
29  
30  
31  
32  
33  
34  
35  
36  
37  
38  
39  
40  
41  
42  
43  
44  
45  
46  
47  
48  
49  
50  
51  
52  
53  
54  
55  
56  
57  
58  
59  
60

### Appendix 3 – Interventions of interest

| <i>Categories</i>                            | <i>Drug names/descriptions</i>                                                                                                                                                                                                                                                                                                                                                                                                                                                                                                                                                                                                                                                                                                                                                                                                                                                                                                                       |
|----------------------------------------------|------------------------------------------------------------------------------------------------------------------------------------------------------------------------------------------------------------------------------------------------------------------------------------------------------------------------------------------------------------------------------------------------------------------------------------------------------------------------------------------------------------------------------------------------------------------------------------------------------------------------------------------------------------------------------------------------------------------------------------------------------------------------------------------------------------------------------------------------------------------------------------------------------------------------------------------------------|
| <i>ACE Inhibitors</i>                        | <ul style="list-style-type: none"> <li>Benazepril (Lotensin), Captopril (Capoten), Cilazapril (Inhibace), Enalapril (Vasotec), Fosinopril (Monopril), Lisinopril (Prinivil, Zestril), Perindopril (Coversyl), Quinapril (Accupril), Ramipril (Altace), Trandolapril (Mavik)</li> </ul>                                                                                                                                                                                                                                                                                                                                                                                                                                                                                                                                                                                                                                                               |
| <i>Angiotensin II Receptor Blocker (ARB)</i> | <ul style="list-style-type: none"> <li>Azilsartan (Edarbi), candesartan (Atacand), eprosartan (Teveten), irbesartan (Avapro), telmisartan (Micardis), valsartan (Diovan, Prexxartan), losartan (Cozaar), olmesartan (Benicar), entresto (sacubitril/valsartan), byvalson (nebivolol/valsartan),</li> </ul>                                                                                                                                                                                                                                                                                                                                                                                                                                                                                                                                                                                                                                           |
| <i>Antibiotics/antiparasitic</i>             | <ul style="list-style-type: none"> <li>Suramin, Carriomycin, Suramin sodium, Colistin, Teicoplanin, Ivermectin, azithromycin</li> </ul>                                                                                                                                                                                                                                                                                                                                                                                                                                                                                                                                                                                                                                                                                                                                                                                                              |
| <i>Antibodies</i>                            | <ul style="list-style-type: none"> <li>SARS-Cov-2 specific neutralizing antibodies</li> <li>Bevicizumab, Ruxolitinib, Tocilizumab, Adalimumab, Camrelizumab, Eculizumab, Mepolizumab, "PD-1 mAb", Tocilizumab, tozumab, abciximab (Reopro), adalimumab (Humira/Amjevita), alefacept (Amevive), alemtuzumab (Campath), basiliximab (Simulect), belimumab (Benlysta), bezlotoxumab (Zinplava), canakinumab (Ilaris), certolizumab (Cimzia), cetuximab (Erbix), daclizumab (Zenapax/Zinbryta), denosumab (Prolia/Xgeva), efalizumab (Raptiva), golimumab (Simponi), inflectra (Remicade), ipilimumab (Yervoy), ixekizumab (Taltz), natalizumab (Tysabri), nivolumab (Opdivo), olaratumab (Lartruvo), omalizumab (Xolair), palivizumab (Synagis), panitumumab (Vectibix), pembrolizumab (Keytruda), rituximab (Rituxan), tocilizumab (Actemra/ RoActemra), trastuzumab (Herceptin), secukinumab (Cosentyx), ustekinumab (Stelara), Meplazumab</li> </ul> |
| <i>Anticancer/chemotherapy</i>               | <ul style="list-style-type: none"> <li>Dasatinib, Epirubicin, Gemcitabine hydrochloride, Homoharringtonine , Imatinib mesylate, Tamoxifen, Toremifene, Valrubicin</li> </ul>                                                                                                                                                                                                                                                                                                                                                                                                                                                                                                                                                                                                                                                                                                                                                                         |
| <i>Anticoagulants</i>                        | <ul style="list-style-type: none"> <li>dalteparin, enoxaparin, tinzaparin, fondaparinux heparin, dabigatran, edoxaban, rivaroxaban, apixaban, warfarin, betrixaban, heparin, danaparoid</li> </ul>                                                                                                                                                                                                                                                                                                                                                                                                                                                                                                                                                                                                                                                                                                                                                   |
| <i>Antimalarials</i>                         | <ul style="list-style-type: none"> <li>Amodiaquine, Basoquin, Camoquin, Flavoquine, Chloroquine, Resochin, Dawaquin, Lariago, Aarlen, Hydroxychloroquine, Hydroxy-chloroquine, Plaquenil, Hydroquin, Axemal, Dolquine, Quensyl, Quinoric, Imiquimiod, Aldara, Vyloma,, Zyclara, Primaquine, Jasoprim, Malirid, Neo-Quipenyl, Pimaquin, Pmq, Primachina, Primacin, Primaquina, Primaquine, Primaquine, Remaquin, Tafenoquine, Krinfatel, Kozenis, Arakoda, Krintafel, Pamaquine, Plasmochin,</li> </ul>                                                                                                                                                                                                                                                                                                                                                                                                                                               |

|    |                                    |                                                                                                                                                                                                                                                                                                                                                                                                                                                                                                                                                                                                                                                                                                                                                                                                                                                                                                                                                                                                                                                                                                                                                                                                                                                                                                                                                                             |
|----|------------------------------------|-----------------------------------------------------------------------------------------------------------------------------------------------------------------------------------------------------------------------------------------------------------------------------------------------------------------------------------------------------------------------------------------------------------------------------------------------------------------------------------------------------------------------------------------------------------------------------------------------------------------------------------------------------------------------------------------------------------------------------------------------------------------------------------------------------------------------------------------------------------------------------------------------------------------------------------------------------------------------------------------------------------------------------------------------------------------------------------------------------------------------------------------------------------------------------------------------------------------------------------------------------------------------------------------------------------------------------------------------------------------------------|
| 1  |                                    |                                                                                                                                                                                                                                                                                                                                                                                                                                                                                                                                                                                                                                                                                                                                                                                                                                                                                                                                                                                                                                                                                                                                                                                                                                                                                                                                                                             |
| 2  |                                    |                                                                                                                                                                                                                                                                                                                                                                                                                                                                                                                                                                                                                                                                                                                                                                                                                                                                                                                                                                                                                                                                                                                                                                                                                                                                                                                                                                             |
| 3  |                                    | Plasmoquine, Plsamaguine, Neo-Quipenyl, Primachin, Dihydroartemisinin, mefloquine,                                                                                                                                                                                                                                                                                                                                                                                                                                                                                                                                                                                                                                                                                                                                                                                                                                                                                                                                                                                                                                                                                                                                                                                                                                                                                          |
| 4  |                                    | Nitazoxanide, Nitrothiazole                                                                                                                                                                                                                                                                                                                                                                                                                                                                                                                                                                                                                                                                                                                                                                                                                                                                                                                                                                                                                                                                                                                                                                                                                                                                                                                                                 |
| 5  |                                    |                                                                                                                                                                                                                                                                                                                                                                                                                                                                                                                                                                                                                                                                                                                                                                                                                                                                                                                                                                                                                                                                                                                                                                                                                                                                                                                                                                             |
| 6  | <i>Antiviral – Direct acting</i>   | <ul style="list-style-type: none"> <li>• Protease inhibitors: boceprevir, telaprevir, lopinavir, ritonavir, lopinavir/ritonavir (Kaletra), darunavir/cobicistat (Prezcobix), indinavir (Crixivan), saquinavir (Invirase)</li> <li>• Integrase inhibitors: raltegravir, elvitegravir, dolutegravir</li> <li>• Entry (fusion) inhibitors: maraviroc (celsentri)</li> <li>• Nucleoside reverse transcriptase inhibitors: abacavir, ziagen, emtricitabine, emtriva, lamivudine, epivir, tenofovir (Viread), zidovudine, azidothymidine, retrovir</li> <li>• Nonnucleoside reverse transcriptase inhibitors : , doravirine, pifeltro, efavirenz, sustiva, etravirine, intelence, nevirapine, viramune, rilpivirine, edurant</li> <li>• Acyclic nucleoside phosphonate analogues: cidofovir diphosphates</li> <li>• Acyclic guanosine analogues: acyclovir</li> <li>• Pyrophosphate analogues: foscarnet, fomivirsen</li> <li>• Oligonucleotides</li> <li>• Nucleotide analog inhibitor: sofosbuvir</li> <li>• Nucleoside inhibitor: ribavirin (Ibavyr)</li> <li>• Matrix 2 protein inhibitors: amantadine</li> <li>• RNA polymerase inhibitors: Rimantadine</li> <li>• Neuraminidase inhibitors: oseltamivir (Tamiflu), peramivir (Rapivab), zanamivir (Relenza)</li> <li>• Antiretrovirals: ASC09, Azvudine, Danoprevir, Darunavir, Lopinavir, ritonavir, Remdesivir</li> </ul> |
| 7  |                                    |                                                                                                                                                                                                                                                                                                                                                                                                                                                                                                                                                                                                                                                                                                                                                                                                                                                                                                                                                                                                                                                                                                                                                                                                                                                                                                                                                                             |
| 8  |                                    |                                                                                                                                                                                                                                                                                                                                                                                                                                                                                                                                                                                                                                                                                                                                                                                                                                                                                                                                                                                                                                                                                                                                                                                                                                                                                                                                                                             |
| 9  |                                    |                                                                                                                                                                                                                                                                                                                                                                                                                                                                                                                                                                                                                                                                                                                                                                                                                                                                                                                                                                                                                                                                                                                                                                                                                                                                                                                                                                             |
| 10 |                                    |                                                                                                                                                                                                                                                                                                                                                                                                                                                                                                                                                                                                                                                                                                                                                                                                                                                                                                                                                                                                                                                                                                                                                                                                                                                                                                                                                                             |
| 11 |                                    |                                                                                                                                                                                                                                                                                                                                                                                                                                                                                                                                                                                                                                                                                                                                                                                                                                                                                                                                                                                                                                                                                                                                                                                                                                                                                                                                                                             |
| 12 |                                    |                                                                                                                                                                                                                                                                                                                                                                                                                                                                                                                                                                                                                                                                                                                                                                                                                                                                                                                                                                                                                                                                                                                                                                                                                                                                                                                                                                             |
| 13 |                                    |                                                                                                                                                                                                                                                                                                                                                                                                                                                                                                                                                                                                                                                                                                                                                                                                                                                                                                                                                                                                                                                                                                                                                                                                                                                                                                                                                                             |
| 14 |                                    |                                                                                                                                                                                                                                                                                                                                                                                                                                                                                                                                                                                                                                                                                                                                                                                                                                                                                                                                                                                                                                                                                                                                                                                                                                                                                                                                                                             |
| 15 |                                    |                                                                                                                                                                                                                                                                                                                                                                                                                                                                                                                                                                                                                                                                                                                                                                                                                                                                                                                                                                                                                                                                                                                                                                                                                                                                                                                                                                             |
| 16 |                                    |                                                                                                                                                                                                                                                                                                                                                                                                                                                                                                                                                                                                                                                                                                                                                                                                                                                                                                                                                                                                                                                                                                                                                                                                                                                                                                                                                                             |
| 17 |                                    |                                                                                                                                                                                                                                                                                                                                                                                                                                                                                                                                                                                                                                                                                                                                                                                                                                                                                                                                                                                                                                                                                                                                                                                                                                                                                                                                                                             |
| 18 |                                    |                                                                                                                                                                                                                                                                                                                                                                                                                                                                                                                                                                                                                                                                                                                                                                                                                                                                                                                                                                                                                                                                                                                                                                                                                                                                                                                                                                             |
| 19 |                                    |                                                                                                                                                                                                                                                                                                                                                                                                                                                                                                                                                                                                                                                                                                                                                                                                                                                                                                                                                                                                                                                                                                                                                                                                                                                                                                                                                                             |
| 20 |                                    |                                                                                                                                                                                                                                                                                                                                                                                                                                                                                                                                                                                                                                                                                                                                                                                                                                                                                                                                                                                                                                                                                                                                                                                                                                                                                                                                                                             |
| 21 |                                    |                                                                                                                                                                                                                                                                                                                                                                                                                                                                                                                                                                                                                                                                                                                                                                                                                                                                                                                                                                                                                                                                                                                                                                                                                                                                                                                                                                             |
| 22 |                                    |                                                                                                                                                                                                                                                                                                                                                                                                                                                                                                                                                                                                                                                                                                                                                                                                                                                                                                                                                                                                                                                                                                                                                                                                                                                                                                                                                                             |
| 23 |                                    |                                                                                                                                                                                                                                                                                                                                                                                                                                                                                                                                                                                                                                                                                                                                                                                                                                                                                                                                                                                                                                                                                                                                                                                                                                                                                                                                                                             |
| 24 |                                    |                                                                                                                                                                                                                                                                                                                                                                                                                                                                                                                                                                                                                                                                                                                                                                                                                                                                                                                                                                                                                                                                                                                                                                                                                                                                                                                                                                             |
| 25 |                                    |                                                                                                                                                                                                                                                                                                                                                                                                                                                                                                                                                                                                                                                                                                                                                                                                                                                                                                                                                                                                                                                                                                                                                                                                                                                                                                                                                                             |
| 26 |                                    |                                                                                                                                                                                                                                                                                                                                                                                                                                                                                                                                                                                                                                                                                                                                                                                                                                                                                                                                                                                                                                                                                                                                                                                                                                                                                                                                                                             |
| 27 |                                    |                                                                                                                                                                                                                                                                                                                                                                                                                                                                                                                                                                                                                                                                                                                                                                                                                                                                                                                                                                                                                                                                                                                                                                                                                                                                                                                                                                             |
| 28 | <i>Antiviral – Other</i>           | <ul style="list-style-type: none"> <li>• Baloxavir, marboxil, EIDD-2801</li> </ul>                                                                                                                                                                                                                                                                                                                                                                                                                                                                                                                                                                                                                                                                                                                                                                                                                                                                                                                                                                                                                                                                                                                                                                                                                                                                                          |
| 29 |                                    |                                                                                                                                                                                                                                                                                                                                                                                                                                                                                                                                                                                                                                                                                                                                                                                                                                                                                                                                                                                                                                                                                                                                                                                                                                                                                                                                                                             |
| 30 | <i>Antivirals – Broad spectrum</i> | <ul style="list-style-type: none"> <li>• Favipiravir, Triazavirin, Umifenovir (arbidol hydrochloride), Galidesivir</li> </ul>                                                                                                                                                                                                                                                                                                                                                                                                                                                                                                                                                                                                                                                                                                                                                                                                                                                                                                                                                                                                                                                                                                                                                                                                                                               |
| 31 |                                    |                                                                                                                                                                                                                                                                                                                                                                                                                                                                                                                                                                                                                                                                                                                                                                                                                                                                                                                                                                                                                                                                                                                                                                                                                                                                                                                                                                             |
| 32 |                                    |                                                                                                                                                                                                                                                                                                                                                                                                                                                                                                                                                                                                                                                                                                                                                                                                                                                                                                                                                                                                                                                                                                                                                                                                                                                                                                                                                                             |
| 33 | <i>Immune support/modulating</i>   | <ul style="list-style-type: none"> <li>• Convalescent plasma</li> <li>• Recombinant human ACE-2: APN01</li> <li>• Natural killer (NK) cells</li> <li>• Mesenchymal stem cells</li> <li>• Interferons: Interferon-alpha, Interferon-beta, Interferon-gamma, interferon <math>\beta</math> – 1b (Betaseron/Extavia), interferon beta – 1a (Rebif)</li> <li>• Intravenous Immunoglobulin: Flebogamma DIF; Gamunex; Globulin-N; Globulin N; Intraglobin; Intraglobin F, Gammagard; Gamimune; Gamimmune, Privigen; Sandoglobulin; Venoglobulin;</li> </ul>                                                                                                                                                                                                                                                                                                                                                                                                                                                                                                                                                                                                                                                                                                                                                                                                                       |
| 34 |                                    |                                                                                                                                                                                                                                                                                                                                                                                                                                                                                                                                                                                                                                                                                                                                                                                                                                                                                                                                                                                                                                                                                                                                                                                                                                                                                                                                                                             |
| 35 |                                    |                                                                                                                                                                                                                                                                                                                                                                                                                                                                                                                                                                                                                                                                                                                                                                                                                                                                                                                                                                                                                                                                                                                                                                                                                                                                                                                                                                             |
| 36 |                                    |                                                                                                                                                                                                                                                                                                                                                                                                                                                                                                                                                                                                                                                                                                                                                                                                                                                                                                                                                                                                                                                                                                                                                                                                                                                                                                                                                                             |
| 37 |                                    |                                                                                                                                                                                                                                                                                                                                                                                                                                                                                                                                                                                                                                                                                                                                                                                                                                                                                                                                                                                                                                                                                                                                                                                                                                                                                                                                                                             |
| 38 |                                    |                                                                                                                                                                                                                                                                                                                                                                                                                                                                                                                                                                                                                                                                                                                                                                                                                                                                                                                                                                                                                                                                                                                                                                                                                                                                                                                                                                             |
| 39 |                                    |                                                                                                                                                                                                                                                                                                                                                                                                                                                                                                                                                                                                                                                                                                                                                                                                                                                                                                                                                                                                                                                                                                                                                                                                                                                                                                                                                                             |
| 40 |                                    |                                                                                                                                                                                                                                                                                                                                                                                                                                                                                                                                                                                                                                                                                                                                                                                                                                                                                                                                                                                                                                                                                                                                                                                                                                                                                                                                                                             |
| 41 |                                    |                                                                                                                                                                                                                                                                                                                                                                                                                                                                                                                                                                                                                                                                                                                                                                                                                                                                                                                                                                                                                                                                                                                                                                                                                                                                                                                                                                             |
| 42 |                                    |                                                                                                                                                                                                                                                                                                                                                                                                                                                                                                                                                                                                                                                                                                                                                                                                                                                                                                                                                                                                                                                                                                                                                                                                                                                                                                                                                                             |
| 43 |                                    |                                                                                                                                                                                                                                                                                                                                                                                                                                                                                                                                                                                                                                                                                                                                                                                                                                                                                                                                                                                                                                                                                                                                                                                                                                                                                                                                                                             |
| 44 |                                    |                                                                                                                                                                                                                                                                                                                                                                                                                                                                                                                                                                                                                                                                                                                                                                                                                                                                                                                                                                                                                                                                                                                                                                                                                                                                                                                                                                             |
| 45 |                                    |                                                                                                                                                                                                                                                                                                                                                                                                                                                                                                                                                                                                                                                                                                                                                                                                                                                                                                                                                                                                                                                                                                                                                                                                                                                                                                                                                                             |
| 46 |                                    |                                                                                                                                                                                                                                                                                                                                                                                                                                                                                                                                                                                                                                                                                                                                                                                                                                                                                                                                                                                                                                                                                                                                                                                                                                                                                                                                                                             |
| 47 |                                    |                                                                                                                                                                                                                                                                                                                                                                                                                                                                                                                                                                                                                                                                                                                                                                                                                                                                                                                                                                                                                                                                                                                                                                                                                                                                                                                                                                             |

|                                                                  |                                                                                                                                                                                                                                                                                                                                                                                                                                                                                                                                                                                                                                                                                                                                                                                                                                                                                                                                                                                                                                                                                                                                                  |
|------------------------------------------------------------------|--------------------------------------------------------------------------------------------------------------------------------------------------------------------------------------------------------------------------------------------------------------------------------------------------------------------------------------------------------------------------------------------------------------------------------------------------------------------------------------------------------------------------------------------------------------------------------------------------------------------------------------------------------------------------------------------------------------------------------------------------------------------------------------------------------------------------------------------------------------------------------------------------------------------------------------------------------------------------------------------------------------------------------------------------------------------------------------------------------------------------------------------------|
|                                                                  | Venoglobulin-I; Venoglobulin I; Venimmune; Iveegam; Alphaglobin; Endobulin; Gamimune N; Gamimmune N; Gammonativ                                                                                                                                                                                                                                                                                                                                                                                                                                                                                                                                                                                                                                                                                                                                                                                                                                                                                                                                                                                                                                  |
| <i>Interleukin Inhibitors</i>                                    | <ul style="list-style-type: none"> <li>• Interleukin (IL)-1 Inhibitor: Anakinra</li> <li>• Interleukin (IL)-6 Inhibitors: Sarilumab (Kevzara); Siltuximab</li> <li>• Anti-Tumor necrosis factor-alpha (anti-TNF-alpha)</li> <li>• Anti-Granulocyte-macrophage colony-stimulating factor (anti-GM-CSF)</li> </ul>                                                                                                                                                                                                                                                                                                                                                                                                                                                                                                                                                                                                                                                                                                                                                                                                                                 |
| <i>Kinase Inhibitors</i>                                         | <ul style="list-style-type: none"> <li>• Baricitinib, Acalabrutinib (Calquence), Fedratinib, Ruxolitinib, Jakotinib, Ruxolitinib, Sunitinib, Erlotinib</li> </ul>                                                                                                                                                                                                                                                                                                                                                                                                                                                                                                                                                                                                                                                                                                                                                                                                                                                                                                                                                                                |
| <i>Nonspecific anti-inflammatory and immunosuppressive drugs</i> | <ul style="list-style-type: none"> <li>• Fingolimod Hydrochloride, Leflunomide, Thalidomide, Methylprednisone, Prednisolone, Fluprednisolone, Corticosteroids, Cyclosporin A, Glycyrrhizic Acid/Glycyrrhizic</li> </ul>                                                                                                                                                                                                                                                                                                                                                                                                                                                                                                                                                                                                                                                                                                                                                                                                                                                                                                                          |
| <i>Other</i>                                                     | <ul style="list-style-type: none"> <li>• Disulfiram (acetaldehyde dehydrogenase inhibitor), Emetine (alkaloid emetic), Clomipramine (antidepressant), Loperamide (antidiarrheal), Caspofungin (antifungal), Terconazole (antifungal), Colchicine (anti-gout agent), Promethazine hydrochloride (antihistamine), Azelastine (antihistamine), Aprepitant (anti-nausea/antiemetic), Perphenazine (antipsychotic), Chlorpromazine hydrochloride (antipsychotic), Icatibant (Bradykinin B2 Receptor Antagonists), Metformin (diabetes), Bepotastine (histamine 1 antagonist), Epoprostenol (prostaglandin), Vapreotide (somatostatin), Conivaptan (vasopressin inhibitor), Nitric oxide (vasodilator), Acetylcysteine (prodrug), Potassium citrate (alkalinizer), Dipyridamole (vasodilator), Hydrogen peroxide, Cobicistat (Tybost), Bromhexine (mucolytic), Ebastine (H1 receptor agonist), Pirfenidone (antifibrotic), Polyinosinic-polycytidylic (Poly I-C), rhG-CSF, Thymosin, Tranilast, Ascorbic Acid, Aviptadil (neuropeptide), Ifendopril (NMDA inhibitor), fenretinide (synthetic retinoid), famotidine (H2 receptor antagonist)</li> </ul> |

#### Appendix 4 – Studies excluded during full-text screening

| Title                                                                                                                                              | Reason for exclusion    |
|----------------------------------------------------------------------------------------------------------------------------------------------------|-------------------------|
| A retrospective study of the clinical characteristics of COVID-19 infection in 26 children                                                         | Ineligible intervention |
| Acute gastrointestinal injury in critically ill patients with coronavirus disease 2019 in Wuhan, China                                             | Ineligible intervention |
| Impact of COVID-19 pandemic on severity of illness and resources required during intensive care in the greater New York City area                  | Ineligible intervention |
| A major outbreak of severe acute respiratory syndrome in Hong Kong                                                                                 | Ineligible intervention |
| Temporal Patterns of Hepatic Dysfunction and Disease Severity in Patients with SARS                                                                | Ineligible intervention |
| Serum LD1 isoenzyme and blood lymphocyte subsets as prognostic indicators for severe acute respiratory syndrome                                    | Ineligible intervention |
| Factors associated with psychosis among patients with severe acute respiratory syndrome: A case-control study                                      | Ineligible intervention |
| Treatment of severe acute respiratory syndrome with glucosteroids: the Guangzhou experience                                                        | Ineligible intervention |
| Clinical features and progression of acute respiratory distress syndrome in coronavirus disease 2019                                               | Ineligible intervention |
| Clinical characteristics of 50466 patients with 2019-nCoV infection                                                                                | Ineligible intervention |
| Clinical characteristics of 51 patients discharged from hospital with COVID-19 in Chongqing, China                                                 | Ineligible intervention |
| Epidemiologic and Clinical Characteristics of 91 Hospitalized Patients with COVID-19 in Zhejiang, China: A retrospective, multi-centre case series | Ineligible intervention |
| Clinical Features of COVID-19 Related Liver Damage                                                                                                 | Ineligible intervention |
| Epidemiological and Clinical Characteristics of Children with Coronavirus Disease 2019                                                             | Ineligible intervention |

|                                                                                                                                                                          |                         |
|--------------------------------------------------------------------------------------------------------------------------------------------------------------------------|-------------------------|
| Clinical characteristics of 36 non-survivors with COVID-19 in Wuhan, China                                                                                               | Ineligible intervention |
| Association of Cardiovascular Manifestations with In-hospital Outcomes in Patients with COVID-19: A Hospital Staff Data                                                  | Ineligible intervention |
| Epidemiological and clinical features of 2019-nCoV acute respiratory disease cases in Chongqing municipality, China: a retrospective, descriptive, multiple-center study | Ineligible intervention |
| Clinical features and outcomes of 221 patients with COVID-19 in Wuhan, China                                                                                             | Ineligible intervention |
| Clinical features and outcomes of 2019 novel coronavirus-infected patients with cardiac injury                                                                           | Ineligible intervention |
| Clinical Characteristics of SARS-CoV-2 Pneumonia Compared to Controls in Chinese Han Population                                                                          | Ineligible intervention |
| Retrospective Analysis of Clinical Features in 101 Death Cases with COVID-19                                                                                             | Ineligible intervention |
| Characteristics of patients with COVID-19 during epidemic ongoing outbreak in Wuhan, China                                                                               | Ineligible intervention |
| Maternal and neonatal outcomes of pregnant women with COVID-19 pneumonia: a case-control study                                                                           | Ineligible intervention |
| The first report of the prevalence of COVID-19 in Chronic myelogenous leukemia patients in the core epidemic area of China:multicentre, cross-sectional survey           | Ineligible intervention |
| Influence factors of death risk among COVID-19 patients in Wuhan, China: a hospital-based case-cohort study                                                              | Ineligible intervention |
| Clinical characteristics and durations of hospitalized patients with COVID-19 in Beijing: a retrospective cohort study                                                   | Ineligible intervention |
| Anti-hypertensive Angiotensin II receptor blockers associated to mitigation of disease severity in elderly COVID-19 patients                                             | Ineligible intervention |
| Clinical features and the maternal and neonatal outcomes of pregnant women with coronavirus disease 2019                                                                 | Ineligible intervention |
| Clinical features and outcomes of 197 adult discharged patients with COVID-19 in Yichang, Hubei                                                                          | Ineligible intervention |
| Radiographic Findings and other Predictors in Adults with Covid-19                                                                                                       | Ineligible intervention |

|                                                                                                                                                                                                                  |                         |
|------------------------------------------------------------------------------------------------------------------------------------------------------------------------------------------------------------------|-------------------------|
| Anaesthetic management and clinical outcomes of parturients with COVID-19: a multicentre, retrospective, propensity score matched cohort study                                                                   | Ineligible intervention |
| SARS-COV-2 comorbidity network and outcome in hospitalized patients in Crema, Italy                                                                                                                              | Ineligible intervention |
| Clinical features and management of severe COVID-19: A retrospective study in Wuxi, Jiangsu Province, China                                                                                                      | Ineligible intervention |
| A Randomized, Single-blind, Group sequential, Active-controlled Study to evaluate the clinical efficacy and safety of $\alpha$ -Lipoic acid for critically ill patients with coronavirus disease 2019 (COVID-19) | Ineligible intervention |
| Epidemiology, clinical course, and outcomes of critically ill adults with COVID-19 in New York City: a prospective cohort study                                                                                  | Ineligible intervention |
| Critically ill healthcare workers with the middle east respiratory syndrome (MERS): A multicenter study                                                                                                          | Ineligible intervention |
| Noninvasive ventilation in critically ill patients with the Middle East respiratory syndrome                                                                                                                     | Ineligible intervention |
| Long-term consequences in lung and bone associated with hospital-acquired severe acute respiratory syndrome: a 15-year follow-up from a prospective cohort study.                                                | Ineligible intervention |
| Association of HLA class I and II alleles with susceptibility to Severe acute respiratory syndrome infection in North China.                                                                                     | Ineligible intervention |
| Clinical characteristics of 2019 novel coronavirus infection in China                                                                                                                                            | Ineligible intervention |
| Clinical features and outcomes of severe acute respiratory syndrome and predictive factors for acute respiratory distress syndrome.                                                                              | Ineligible intervention |
| Clinical Manifestations, Laboratory Findings, and Treatment Outcomes of SARS Patients                                                                                                                            | Ineligible intervention |
| Clinical progression and viral load in a community outbreak of coronavirus-associated SARS pneumonia: a prospective study.                                                                                       | Ineligible intervention |
| Comparison of clinical course of patients with severe acute respiratory syndrome among the multiple generations of nosocomial transmission.                                                                      | Ineligible intervention |
| Effectiveness of noninvasive positive pressure ventilation in the treatment of acute respiratory failure in severe acute respiratory syndrome.                                                                   | Ineligible intervention |
| Noninvasive positive pressure ventilation treatment for acute respiratory failure in SARS                                                                                                                        | Ineligible intervention |

|                                                                                                                                                                                                                                                                               |                                                                                                                                            |                         |
|-------------------------------------------------------------------------------------------------------------------------------------------------------------------------------------------------------------------------------------------------------------------------------|--------------------------------------------------------------------------------------------------------------------------------------------|-------------------------|
| 1<br>2<br>3<br>4<br>5<br>6<br>7<br>8<br>9<br>10<br>11<br>12<br>13<br>14<br>15<br>16<br>17<br>18<br>19<br>20<br>21<br>22<br>23<br>24<br>25<br>26<br>27<br>28<br>29<br>30<br>31<br>32<br>33<br>34<br>35<br>36<br>37<br>38<br>39<br>40<br>41<br>42<br>43<br>44<br>45<br>46<br>47 | Serum hepatic enzyme manifestations in patients with severe acute respiratory syndrome: Retrospective analysis.                            | Ineligible intervention |
|                                                                                                                                                                                                                                                                               | Severe acute respiratory syndrome (SARS) in Singapore: Clinical features of index patient and initial contacts.                            | Ineligible intervention |
|                                                                                                                                                                                                                                                                               | Severe acute respiratory syndrome in Taiwan: analysis of epidemiological characteristics in 29 cases.                                      | Ineligible intervention |
|                                                                                                                                                                                                                                                                               | Effective Treatment of Severe COVID-19 Patients with Tocilizumab                                                                           | Ineligible study design |
|                                                                                                                                                                                                                                                                               | Key to successful treatment of COVID-19: accurate identification of severe risks and early intervention of disease progression             | Ineligible study design |
|                                                                                                                                                                                                                                                                               | Treatment of severe acute respiratory syndrome with convalescent plasma                                                                    | Ineligible study design |
|                                                                                                                                                                                                                                                                               | Severe acute respiratory syndrome in children: experience in a regional hospital in Hong Kong                                              | Ineligible study design |
|                                                                                                                                                                                                                                                                               | Critically ill patients with severe acute respiratory syndrome                                                                             | Ineligible study design |
|                                                                                                                                                                                                                                                                               | Short term outcome and risk factors for adverse clinical outcomes in adults with severe acute respiratory syndrome (SARS)                  | Ineligible study design |
|                                                                                                                                                                                                                                                                               | Epidemiologic features, clinical diagnosis and therapy of first cluster of patients with severe acute respiratory syndrome in Beijing area | Ineligible study design |
|                                                                                                                                                                                                                                                                               | Management of severe acute respiratory syndrome: the Hong Kong University experience                                                       | Ineligible study design |
|                                                                                                                                                                                                                                                                               | Severe acute respiratory syndrome: Clinical outcome and prognostic correlates                                                              | Ineligible study design |
|                                                                                                                                                                                                                                                                               | Short-term outcome of critically ill patients with severe acute respiratory syndrome                                                       | Ineligible study design |
|                                                                                                                                                                                                                                                                               | Clinical Description of a Completed Outbreak of SARS in Vietnam February-May 2003                                                          | Ineligible study design |
|                                                                                                                                                                                                                                                                               | Factors of avascular necrosis of femoral head and osteoporosis in SARS patients' convalescence                                             | Ineligible study design |
|                                                                                                                                                                                                                                                                               | Six month radiological and physiological outcomes in severe acute respiratory syndrome (SARS) survivors                                    | Ineligible study design |



|                                                                                                                                                                    |                         |
|--------------------------------------------------------------------------------------------------------------------------------------------------------------------|-------------------------|
| Pentaglobin in steroid-resistant severe acute respiratory syndrome                                                                                                 | Ineligible study design |
| Use of convalescent plasma therapy in SARS patients in Hong Kong                                                                                                   | Ineligible study design |
| Reduced bone mineral density in male Severe Acute Respiratory Syndrome (SARS) patients in Hong Kong                                                                | Ineligible study design |
| Steroid-induced osteonecrosis in severe acute respiratory syndrome: a retrospective analysis of biochemical markers of bone metabolism and corticosteroid therapy. | Ineligible study design |
| Characteristic features and outcomes of severe acute respiratory syndrome found in severe acute respiratory syndrome intensive care unit patients                  | Ineligible study design |
| Clinical findings in critical ill patients infected with SARS-Cov-2 in Guangdong Province, China: a multi-center, retrospective, observational study               | Ineligible study design |
| First Clinical Study Using HCV Protease Inhibitor Danoprevir to Treat Naive and Experienced COVID-19 Patients                                                      | Ineligible study design |
| Dynamic profile of severe or critical COVID-19 cases                                                                                                               | Ineligible study design |
| Factors associated with prolonged viral shedding and impact of Lopinavir/Ritonavir treatment in patients with SARS-CoV-2 infection                                 | Ineligible study design |
| Medical treatment of 55 patients with COVID-19 from seven cities in northeast China who fully recovered: a single-center, retrospective, observational study       | Ineligible study design |
| Associations of clinical characteristics and antiviral drugs with viral RNA clearance in patients with COVID-19 in Guangzhou, China: a retrospective cohort study  | Ineligible study design |
| Clinical efficacy of intravenous immunoglobulin therapy in critical patients with COVID-19: A multicenter retrospective cohort study                               | Ineligible study design |
| Clinical characteristics of 34 COVID-19 patients admitted to ICU in Hangzhou, China                                                                                | Ineligible study design |
| COVID-19 in Iran, a comprehensive investigation from exposure to treatment outcomes                                                                                | Ineligible study design |
| Critically Ill Patients With the Middle East Respiratory Syndrome                                                                                                  | Ineligible study design |
| Hydroxychloroquine and azithromycin as a treatment of COVID-19: results of an open-label non-randomized clinical trial                                             | Ineligible study design |

|                                                                                                                                                                                     |                             |
|-------------------------------------------------------------------------------------------------------------------------------------------------------------------------------------|-----------------------------|
| Influence of factors on production of IgG antibody in SARS patients. [Chinese]                                                                                                      | Ineligible study design     |
| Potential benefits of precise corticosteroids therapy for severe 2019-nCoV pneumonia.                                                                                               | Ineligible study design     |
| Long-term bone and lung consequences associated with hospital-acquired severe acute respiratory syndrome: a 15-year follow-up from a prospective cohort study.                      | Ineligible study design     |
| Avascular necrosis of bone in severe acute respiratory syndrome                                                                                                                     | Ineligible study design     |
| Avascular osteonecrosis after treatment of SARS: a 3-year longitudinal study.                                                                                                       | Ineligible study design     |
| Clinical and microbiological effect of a combination of hydroxychloroquine and azithromycin in 80 COVID-19 patients with at least a six-day follow up: A pilot observational study. | Ineligible study design     |
| QT Interval Prolongation and Torsade De Pointes in Patients with COVID-19 treated with Hydroxychloroquine/Azithromycin                                                              | Ineligible study design     |
| Treatment of severe acute respiratory syndrome in health-care workers.                                                                                                              | Ineligible study design     |
| Beneficial effect of corticosteroids in severe COVID-19 pneumonia: a propensity score matching analysis.                                                                            | Ineligible study design     |
| Early Treatment of COVID-19 Patients With Hydroxychloroquine and Azithromycin: A Retrospective Analysis of 1061 Cases in Marseille, France                                          | Ineligible study design     |
| Sarilumab use in severe SARS-CoV-2 pneumonia                                                                                                                                        | Ineligible study design     |
| Treatment of COVID-19 Patients with Convalescent Plasma in Houston, Texas                                                                                                           | Ineligible study design     |
| The use of corticosteroids in SARS                                                                                                                                                  | Ineligible study population |
| Temporal relationship of viral load, ribavirin, interleukin (IL)-6, IL-8, and clinical progression in patients with severe acute respiratory syndrome                               | Ineligible study population |
| Hydroxychloroquine (HCQ): an observational cohort study in primary and secondary prevention of pneumonia in an at-risk population                                                   | Ineligible study population |

|                            |                                                                                                                                                                     |                             |
|----------------------------|---------------------------------------------------------------------------------------------------------------------------------------------------------------------|-----------------------------|
| 1<br>2<br>3<br>4<br>5<br>6 | Outcomes associated with corticosteroid dosage in critically ill patients with acute exacerbations of chronic obstructive pulmonary disease                         | Ineligible study population |
| 7<br>8<br>9                | No evidence of rapid antiviral clearance or clinical benefit with the combination of hydroxychloroquine and azithromycin in patients with severe COVID-19 infection | Ineligible study population |
| 10<br>11<br>12<br>13       | Effect of Convalescent Plasma Therapy on Viral Shedding and Survival in COVID-19 Patients.                                                                          | Ineligible study population |
| 14<br>15<br>16             | Early preemptive immunomodulators (Corticosteroids) for severe pneumonia patients infected with SARS-COV-2.                                                         | Ineligible study population |
| 17<br>18<br>19<br>20       | Complex Immune Dysregulation in COVID-19 Patients with Severe Respiratory Failure.                                                                                  | Ineligible study population |
| 21<br>22<br>23             | Convalescent plasma: A possible treatment of COVID-19 in India.                                                                                                     | Ineligible study population |
| 24<br>25<br>26<br>27       | Pharmaceutical care of chloroquine phosphate in elderly patients with coronavirus pneumonia (COVID-19).                                                             | Ineligible study population |
| 28<br>29<br>30             | COVID-19 and Chloroquine/Hydroxychloroquine: is there Ophthalmological Concern?.                                                                                    | Ineligible study population |
| 31<br>32<br>33<br>34       | Prolonged disturbances of in vitro cytokine production in patients with severe acute respiratory syndrome (SARS) treated with ribavirin and steroids.               | Ineligible study population |
| 35<br>36<br>37             | COVID-19: disease pathways and gene expression changes predict methylprednisolone can improve outcome in severe cases                                               | Ineligible study population |
| 38<br>39<br>40<br>41       | Retrospective comparison of convalescent plasma with continuing high-dose methylprednisolone treatment in SARS patients.                                            | Ineligible study population |

|                                                                                                                                                       |                             |
|-------------------------------------------------------------------------------------------------------------------------------------------------------|-----------------------------|
| The use of corticosteroid as treatment in SARS was associated with adverse outcomes: a retrospective cohort study                                     | Ineligible study population |
| Clinical Manifestations, Laboratory Findings, and Treatment Outcomes of SARS Patients                                                                 | Ineligible study population |
| Prolonged disturbances of in vitro cytokine production in patients with severe acute respiratory syndrome (SARS) treated with ribavirin and steroids. | Ineligible study population |

## Appendix 5 – Detailed study and patient characteristics

| Author, Year;<br>Country of<br>Conduct<br>Publication Type | Study Period, Setting;<br>Diagnosis, Criteria                                                                                                                               | Age (variance),<br>Sample Size,<br>% Female, % Male          | Co-morbidities (n/N)                                                                                                                                                                                 |
|------------------------------------------------------------|-----------------------------------------------------------------------------------------------------------------------------------------------------------------------------|--------------------------------------------------------------|------------------------------------------------------------------------------------------------------------------------------------------------------------------------------------------------------|
| <i>Controlled Trials n=9</i>                               |                                                                                                                                                                             |                                                              |                                                                                                                                                                                                      |
| Bian, 2020; China<br>Pre-print                             | 28 days, Tangdu Hospital of Fourth Military Medical University;<br>COVID-19, Lab-confirmed                                                                                  | median (IQR): 51 (49-67);<br>28<br>Female: 42.86, Male:57.14 | Diabetes (3/28), Hypertension (9/28), Cardiovascular disease (3/28), Chronic obstructive pulmonary disease (1/28), Parkinson's disease (1/28)                                                        |
| Borba, 2020; Brazil<br>Peer-reviewed                       | Mar 23 to Apr 5, 2020, Hospital e Pronto-Socorro Delphina Rinaldi Abdel Aziz;<br>COVID-19, Lab-confirmed                                                                    | mean (SD): 51.1 (13.9);<br>81<br>Female: 24.7, Male:75.3     | Hypertension (25/55), Alcoholism (14/51), Heart disease (5/55), Asthma (4/54), Chronic kidney disease (4/54), Rheumatic diseases (3/55), Liver diseases (2/55), Tuberculosis (2/55), HIV/AIDS (1/55) |
| Chen, 2020a; China<br>Pre-print                            | Feb 20 to Mar 1, 2020, Zhonghan Hospital of Wuhan University (ZNWU), Leishenshan Hospital (LSS) and the Third Hospital of Hubei Province (HBTH);<br>COVID-19, Lab-confirmed | NR (NR);<br>236<br>Female: 53.39, Male:46.61                 | Hypertension (66/236), Diabetes (27/236), Insomnia (45/236), Conjunctivitis (15/236)                                                                                                                 |
| Chen, 2020b; China<br>Pre-print                            | 10 days, Renmin Hospital of Wuhan University;<br>COVID-19, Lab-confirmed                                                                                                    | mean (SD): 44.7 (15.3);<br>62<br>Female: 53.2, Male:46.8     | None reported                                                                                                                                                                                        |

| Author, Year;<br>Country of<br>Conduct<br>Publication Type | Study Period, Setting;<br>Diagnosis, Criteria                                                                                                                                                             | Age (variance),<br>Sample Size,<br>% Female, % Male            | Co-morbidities (n/N)                                                                                                                                                                                                                                                                                                                                            |
|------------------------------------------------------------|-----------------------------------------------------------------------------------------------------------------------------------------------------------------------------------------------------------|----------------------------------------------------------------|-----------------------------------------------------------------------------------------------------------------------------------------------------------------------------------------------------------------------------------------------------------------------------------------------------------------------------------------------------------------|
| Fadel, 2020; USA<br>Peer reviewed                          | Mar 12 to Mar 27, 2020, five hospitals in southeast and south-central Michigan;<br>COVID-19, WHO or CDC Criteria                                                                                          | Median (IQR): 52 (32-62);<br>127<br>Female: 46.46, Male: 53.54 | Diabetes (17/127), Hypertension (36/127), Coronary artery disease (10/127), Cerebrovascular disease (2/127), Hyperlipidaemia (29/127), Thyroid disease (4/127), Obstructive sleep apnoea (2/127), Crohn's disease (1/127), Epilepsy (1/127), Tuberculosis (2/127), Chronic hepatitis B (3/127), Chronic hepatitis C (1/127), Malignancy (2/127), Smoker (7/127) |
| Hung, 2020; Hong Kong<br>Peer reviewed                     | Feb 10 to Mar 20, 2020, Queen Mary Hospital, Pamela Youde Nethersole Hospital, Ruttonjee Hospital, United Christian Hospital, Queen Elizabeth Hospital, and Tuen Mun Hospital;<br>COVID-19, Lab-confirmed | Mean: 46;<br>150<br>Female: NR, Male: 55                       | Diabetes (21/150), Hypertension (9/150), Others [unspecified] (31/150)                                                                                                                                                                                                                                                                                          |
| Li, 2020; China<br>Pre-print                               | 21 days, Guangzhou Eighth People's Hospital;<br>COVID-19, Lab-confirmed                                                                                                                                   | mean (range): 49.4 (19-79);<br>86<br>Female: 53.49, Male:46.51 | Diabetes (2/86), Hypertension (7/86), Coronary heart disease (2/86), Chronic liver disease (4/86)                                                                                                                                                                                                                                                               |
| Tang, 2020; China<br>Peer-reviewed                         | Feb 11 to Mar 14, 2020, 16 government-designated COVID-19 treatment centers in three provinces in China (Hubei, Henan                                                                                     | Median (IQR): 62 (51-62)<br>213<br>Female: NR, Male: 51.2      | Asthma (33/213), Chronic kidney disease (98/213), Chronic obstructive pulmonary disease (27/213), Congestive heart failure (26/213),                                                                                                                                                                                                                            |

| Author, Year;<br>Country of<br>Conduct<br>Publication Type | Study Period, Setting;<br>Diagnosis, Criteria                                                      | Age (variance),<br>Sample Size,<br>% Female, % Male                                                     | Co-morbidities (n/N)                                                                                                                                                                 |
|------------------------------------------------------------|----------------------------------------------------------------------------------------------------|---------------------------------------------------------------------------------------------------------|--------------------------------------------------------------------------------------------------------------------------------------------------------------------------------------|
|                                                            | and Anhui);<br>COVID-19, Lab-confirmed                                                             |                                                                                                         | Coronary artery disease (38/213),<br>Diabetes (105/213), Hypertension<br>(158/231), Malignancy (24/213),<br>Smoking history (88/213)                                                 |
| Wang, 2020a;<br>China<br>Peer-reviewed                     | 28 days, ten hospitals in Hubei<br>China;<br>COVID-19, Lab-confirmed                               | median (IQR):<br>66 (57-73)[intervention];<br>64 (53-70) [control];<br>236<br>Female: 40.68, Male:59.32 | Any comorbidity (167/236),<br>Hypertension (102/236), Diabetes<br>(56/236), Coronary heart disease<br>(17/236)                                                                       |
| <i>Cohort Studies n=19</i>                                 |                                                                                                    |                                                                                                         |                                                                                                                                                                                      |
| Deng, 2020; China<br>Peer-reviewed                         | 21 days, The Fifth Affiliated<br>Hospital of Sun Yat-Sen<br>University;<br>COVID-19, Lab-confirmed | mean (SD): 44.56 (15.73);<br>33<br>Female: NR, Male:51.51                                               | Chronic obstructive pulmonary<br>disease (1/33), Chronic liver disease<br>(3/33), Diabetes mellitus (5/33),<br>Coronary heart disease (5/33),<br>Hypertension (5/33), Obesity (3/33) |
| Estebanez, 2020;<br>Spain<br>Pre-print                     | Feb 23 to Apr 4, 2020, Central<br>Defense Hospital;<br>COVID-19, Lab-confirmed                     | Mean: 64<br>256<br>Female: NR, Male: 59.4                                                               | Hypertension (114/256), Diabetes<br>Mellitus (47/256), Dyslipidaemia<br>(78/256), Cardiopathy (57/256),<br>Cancer (29/256), Dementia (21/256),<br>Pulmonary disease (37/256)         |
| Kim, 2020; South<br>Korea<br>Pre-print                     | Feb 28 to Apr 28, 2020, Korea<br>Worker's Compensation &                                           | Mean (SD): 38 (15.1);<br>270<br>Female: 64.4, Male: NR                                                  | Hypertension (11/270), Diabetes<br>mellitus (2/270), Dyslipidemia<br>(5/270), Thyroid (4/270)                                                                                        |

| Author, Year;<br>Country of<br>Conduct<br>Publication Type | Study Period, Setting;<br>Diagnosis, Criteria                                                                                                           | Age (variance),<br>Sample Size,<br>% Female, % Male                                                                           | Co-morbidities (n/N)                                                                                                                                                                                                                                                                                                                          |
|------------------------------------------------------------|---------------------------------------------------------------------------------------------------------------------------------------------------------|-------------------------------------------------------------------------------------------------------------------------------|-----------------------------------------------------------------------------------------------------------------------------------------------------------------------------------------------------------------------------------------------------------------------------------------------------------------------------------------------|
|                                                            | Welfare Service Daegu Hospital;<br>COVID-19, Lab-confirmed                                                                                              |                                                                                                                               |                                                                                                                                                                                                                                                                                                                                               |
| Lan, 2020; China<br>Pre-print                              | Feb 21 to Mar 18, 2020, Lishui<br>Central Hospital, Zhejiang, China<br>and Wuhan fourth hospital<br>hospital, Hubei , China;<br>COVID-19, Lab-confirmed | mean (SD):<br>52.3 (15.8)[intervention]<br>59.5 (13.6)[control];<br>73<br>Female: 49.32, Male:50.68                           | Cardiovascular and cerebrovascular<br>disease (20/73), Endocrine system<br>disease (10/73), Malignant tumor<br>(4/73), Respiratory system disease<br>(1/73), Digestive system disease<br>(1/73), Renal disease (1/73), Liver<br>disease (1/73)                                                                                                |
| Lian, 2020; China<br>Peer-reviewed                         | Feb 2 to Mar 20, 2020, non-ICU<br>Ward at Wuhan Jinyintan Hospital;<br>COVID-19, Lab-confirmed                                                          | median (IQR): 60 (49-66);<br>81<br>Female: NR, Male:56                                                                        | Hypertension (16/81), Diabetes<br>(8/81), Coronary Heart Disease (7/81)                                                                                                                                                                                                                                                                       |
| Lu, 2020; China<br>Pre-print                               | 28 days, intensive care wards of<br>Tongji hospital in Wuhan, China;<br>COVID-19, NR                                                                    | median (range): 62 (50-71);<br>244<br>Female: NR, Male:52                                                                     | Hypertension (95/244), Diabetes<br>(44/244), Cerebrovascular Disease<br>(28/244), Chronic Obstructive<br>Pulmonary Disease (12/244)                                                                                                                                                                                                           |
| Magagnoli, 2020;<br>USA<br>Pre-print                       | NR, all United States Veterans<br>Health Administration medical<br>centers;<br>COVID-19, NR                                                             | median (IQR):<br>70 (60-75)[intervention];<br>68 (59-74)[intervention];<br>69 (59-75)[control];<br>368<br>Female: 0, Male:100 | Hyperlipidemia (58/368), Asthma<br>(22/368), Myocardial infarction<br>(18/368), Congestive heart failure<br>(75/368), Peripheral vascular disease<br>(68/368), Cerebrovascular disease<br>(47/368), Dementia (31/368), Chronic<br>pulmonary disease (72/368),<br>Connective tissue disease/Rheumatic<br>disease (5/368), Peptic ulcer disease |



1  
2  
3  
4  
5  
6  
7  
8  
9  
10  
11  
12  
13  
14  
15  
16  
17  
18  
19  
20  
21  
22  
23  
24  
25  
26  
27  
28  
29  
30  
31  
32  
33  
34  
35  
36  
37  
38  
39  
40  
41  
42  
43  
44  
45  
46  
47

| <b>Author, Year;<br/>Country of<br/>Conduct<br/>Publication Type</b> | <b>Study Period, Setting;<br/>Diagnosis, Criteria</b>                                                                          | <b>Age (variance),<br/>Sample Size,<br/>% Female, % Male</b> | <b>Co-morbidities (n/N)</b>                                                                                                                                                                                                                                                                                                            |
|----------------------------------------------------------------------|--------------------------------------------------------------------------------------------------------------------------------|--------------------------------------------------------------|----------------------------------------------------------------------------------------------------------------------------------------------------------------------------------------------------------------------------------------------------------------------------------------------------------------------------------------|
|                                                                      |                                                                                                                                |                                                              | (2/368), Mild liver disease (30/368),<br>Diabetes without complications<br>(159/368), Diabetes with<br>complications (90/368),<br>Paraplegia/Hemiplegia (8/368), Renal<br>disease (92/368), Cancer (59/368),<br>Moderate/severe liver disease<br>(4/368), Metastatic carcinoma<br>(7/368), HIV/AIIDS (9/368)                           |
| Mahévas, 2020;<br>France<br>Pre-print                                | 7 days, four French tertiary care<br>centres providing care to patients<br>with COVID-19 pneumonia;<br>COVID-19, Lab-confirmed | median (IQR): 60 (52-68);<br>181<br>Female: NR, Male:71.1    | Chronic respiratory disease -<br>including asthma (20/181), Chronic<br>heart failure - NYHA III or IV<br>(6/181), Cardiovascular diseases -<br>incl. hypertension (94/181), Diabetes<br>requiring insulin (15/181), Chronic<br>kidney failure (9/181), Liver cirrhosis<br>- Child-Pugh B or more (1/181),<br>Immunodepression (21/181) |
| Mercurio, 2020;<br>USA<br>Peer-reviewed                              | NR, Beth Israel Deaconess<br>Medical Center;<br>COVID-19, Lab-confirmed                                                        | mean (SD): 60.1 (16.7);<br>90<br>Female: 48.9, Male:NR       | Hypertension (48/90), Congestive<br>heart failure (9/90), Diabetes mellitus<br>(26/90), Coronary artery disease<br>(10/90), Atrial fibrillation (12/90),<br>Chronic obstructive pulmonary<br>disease or asthma (18/90)                                                                                                                 |

| Author, Year;<br>Country of<br>Conduct<br>Publication Type | Study Period, Setting;<br>Diagnosis, Criteria                                                                                                                                                                     | Age (variance),<br>Sample Size,<br>% Female, % Male  | Co-morbidities (n/N)                                                                                                                                                                                                                                                                                                                                      |
|------------------------------------------------------------|-------------------------------------------------------------------------------------------------------------------------------------------------------------------------------------------------------------------|------------------------------------------------------|-----------------------------------------------------------------------------------------------------------------------------------------------------------------------------------------------------------------------------------------------------------------------------------------------------------------------------------------------------------|
| Rosenberg, 2020;<br>USA<br>Peer-reviewed                   | Mar 15 to Apr 24, 2020, hospitals in NYC, Nassau County, Suffolk County, and all but one hospital in Westchester County;<br>COVID-19, Lab-confirmed                                                               | NR;<br>1438<br>Female: NR, Male: 59.67               | Obesity [BMI $\geq$ 30] (438/1030), Cancer (55/1438), Any kidney disease (187/1438), Any chronic lung conditions (259/1438), Diabetes (504/1438), Any cardiovascular diseases (438/1438), Hypertension (816/1438), Coronary artery disease (173/1438), Congestive heart failure (96/1438), Dementia (93/1438)                                             |
| Shao, 2020; China<br>Pre-print                             | Dec 2019 to Apr 2020, eight government designated treatment centers for COVID-19 patients (4 ICUs and 4 general wards) in 3 cities in China, including Wuhan, Guangzhou, and Shenzhen;<br>COVID-19, Lab-confirmed | mean (SD): 58 (46-69);<br>325<br>Female: 42, Male:58 | Hypertension (98/325), Coronary heart disease (31/325), Chronic kidney disease (5/325), Diabetes (38/325), Chronic obstructive lung disease (10/325), Stroke (16/325), Carcinoma (10/325), Other (61/325)                                                                                                                                                 |
| Singh, 2020; USA<br>Pre-print                              | Jan 20 to May 1, 2020, 40 million patients from 34 healthcare organizations (HCOs) in the United States;<br>COVID-19, Lab-confirmed                                                                               | NR;<br>1820<br>Female: NR, Male: 54.45               | Hypertensive diseases (1120/1820), Diabetes mellitus (342/1820), Obesity (550/1820), Ischemic heart diseases (525/1820), Chronic kidney disease (408/1820), Heart failure (339/1820), Prolonged QT interval or Long QT Syndrome (46/1820), Atrial fibrillation and flutter (308/1820), Cerebrovascular diseases (242/1820), Chronic obstructive pulmonary |

1  
2  
3  
4  
5  
6  
7  
8  
9  
10  
11  
12  
13  
14  
15  
16  
17  
18  
19  
20  
21  
22  
23  
24  
25  
26  
27  
28  
29  
30  
31  
32  
33  
34  
35  
36  
37  
38  
39  
40  
41  
42  
43  
44  
45  
46  
47

| Author, Year;<br>Country of<br>Conduct<br>Publication Type | Study Period, Setting;<br>Diagnosis, Criteria                                      | Age (variance),<br>Sample Size,<br>% Female, % Male    | Co-morbidities (n/N)                                                                                                                                                                                                                                                                                                                                                                                                                                                               |
|------------------------------------------------------------|------------------------------------------------------------------------------------|--------------------------------------------------------|------------------------------------------------------------------------------------------------------------------------------------------------------------------------------------------------------------------------------------------------------------------------------------------------------------------------------------------------------------------------------------------------------------------------------------------------------------------------------------|
|                                                            |                                                                                    |                                                        | disease (259/1820), Asthma (239/1820), Diseases of liver (181/1820), Malignant neoplasms of lymphoid, hematopoietic and related tissue (62/1820), Rheumatoid arthritis (49/1820), Malignant neoplasm of breast (44/1820), Malignant neoplasm of colon (32/1820), Malignant neoplasm of prostate (31/1820), Systemic lupus erythematosus (SLE) (25/1820), Human immunodeficiency virus [HIV] disease (20/1820), Nicotine dependence (208/1820), Alcohol related disorders (86/1820) |
| Wadud, 2020; USA<br>Pre-print                              | Mar 15 to Apr 20, 2020, Orange Regional Medical Center;<br>COVID-19, Lab-confirmed | NR;<br>94<br>Female: 23.4, Male: 76.6                  | None reported                                                                                                                                                                                                                                                                                                                                                                                                                                                                      |
| Wang, 2020b;<br>China<br>Pre-print                         | Jan 20 to Feb 25, 2020, Wuhan Union Hospital;<br>COVID-19, Lab-confirmed           | median (IQR): 54 (48-64);<br>46<br>Female: NR, Male:57 | Chronic cardiac disease (6/46), Chronic pulmonary disease (3/46), Cerebrovascular disease (2/46), Malignancy (2/46), Diabetes (4/46), Hypertension (14/46)                                                                                                                                                                                                                                                                                                                         |
| Wu, 2020; China<br>Pre-print                               | Dec 26 to Mar 15, 2020, Wuhan Hankou Hospital and No. Six Hospital of Wuhan;       | Median (IQR): 61 (51-70);<br>1514                      | Diabetes (181/1514), Hypertension (354/1514), COPD (42/1514), Cancer                                                                                                                                                                                                                                                                                                                                                                                                               |

| <b>Author, Year;<br/>Country of<br/>Conduct<br/>Publication Type</b>                                                                       | <b>Study Period, Setting;<br/>Diagnosis, Criteria</b>                                                                                   | <b>Age (variance),<br/>Sample Size,<br/>% Female, % Male</b>                                 | <b>Co-morbidities (n/N)</b>                                                                                                                                            |
|--------------------------------------------------------------------------------------------------------------------------------------------|-----------------------------------------------------------------------------------------------------------------------------------------|----------------------------------------------------------------------------------------------|------------------------------------------------------------------------------------------------------------------------------------------------------------------------|
|                                                                                                                                            | COVID-19, Lab-confirmed                                                                                                                 | Female: 52.2, Male: NR                                                                       | (22/1540), CKD (29/1514), Smoking (185/1540)                                                                                                                           |
| Yu, 2020; China<br>Pre-print                                                                                                               | Feb 1 to Apr 8 2020, Tongji Hospital, Wuhan;<br>COVID-19, Lab-confirmed                                                                 | median (NR): 68 (NR);<br>568<br>Female: 36.97, Male:63.03                                    | Hypertension (252/568), Coronary heart disease (59/568), Chronic obstructive pulmonary disease (16/568), Diabetes (97/568)                                             |
| Zeng, 2020; China<br>Peer-reviewed                                                                                                         | NR, The First Affiliated Hospital of Zhengzhou University and The Sixth People's Hospital of Zhengzhou City;<br>COVID-19, Lab-confirmed | median (NR):<br>61.5 (NR)[intervention]<br>73 (NR)[control];<br>21<br>Female: NR, Male:76.19 | Diabetes (6/21), Hypertension (4/21), Chronic liver diseases (2/21), Cardiovascular diseases (1/21), Respiratory system diseases (1/21), Chronic kidney disease (1/21) |
| Zha, 2020; China<br>Peer-reviewed                                                                                                          | Jan 24 to Feb 29, 2020, Second People's Hospital of Wuhu and Yijishan Hospital;<br>COVID-19, Lab-confirmed                              | median (IQR): 39 (32-54);<br>31<br>Female: NR, Male:64                                       | Hypertension (7/31), Diabetes (1/31), Coronary heart disease (1/31), Chronic hepatitis B virus infection (2/31)                                                        |
| Zhu, 2020; China<br>Peer-reviewed                                                                                                          | Jan 23 to Feb 29, 2020, Third People's Hospital of Changzhou and the Second People's Hospital of Wuhu;<br>COVID-19, Lab-confirmed       | NR (NR)<br>50<br>Female: NR, Male:52                                                         | None reported                                                                                                                                                          |
| <p>IQR – interquartile range, NR – Not reported, SD – standard deviation</p> <p>§ Multiple analyses of overlapping cohorts of patients</p> |                                                                                                                                         |                                                                                              |                                                                                                                                                                        |

1  
2  
3  
4  
5  
6  
7  
8  
9  
10  
11  
12  
13  
14  
15  
16  
17  
18  
19  
20  
21  
22  
23  
24  
25  
26  
27  
28  
29  
30  
31  
32  
33  
34  
35  
36  
37  
38  
39  
40  
41  
42  
43  
44  
45  
46  
47

### Appendix 6 – Detailed effectiveness and safety results

| Drug therapy (sample size)<br>[dose, route of administration, frequency, duration; additional therapies]                                                                                                                     | Effectiveness outcome:<br>quantitative results;<br>'study conclusions'                                                                                                                                                                                                                                                                                                                                                                                                                                                                                                                                                                                                                       | Safety outcome:<br>quantitative results;<br>duration, clinical response                                       |
|------------------------------------------------------------------------------------------------------------------------------------------------------------------------------------------------------------------------------|----------------------------------------------------------------------------------------------------------------------------------------------------------------------------------------------------------------------------------------------------------------------------------------------------------------------------------------------------------------------------------------------------------------------------------------------------------------------------------------------------------------------------------------------------------------------------------------------------------------------------------------------------------------------------------------------|---------------------------------------------------------------------------------------------------------------|
| <i>Controlled trials n=9</i>                                                                                                                                                                                                 |                                                                                                                                                                                                                                                                                                                                                                                                                                                                                                                                                                                                                                                                                              |                                                                                                               |
| <b>Study:</b> Bian, 2020<br><b>Condition:</b> COVID-19                                                                                                                                                                       |                                                                                                                                                                                                                                                                                                                                                                                                                                                                                                                                                                                                                                                                                              |                                                                                                               |
| Meplazumab (n=17)<br>[10mg meplazumab administered on day 1, day 2 and day 5 by intravenous infusion (60–90 min); lopinavir/ritonavir (17); recombinant human interferon alfa-2b (17); glucocorticoid (16); antibiotic (17)] | <b>Critical cases (ICU/mechanical ventilation) change from baseline to day 28: 7-&gt;1 patients;</b><br><br><b>Mortality: 0 patients</b><br><br><b>'Compared to control group, meplazumab treatment significantly improved the discharged (p=0.006) and case severity (p=0.021) in critical and severe patients...at day 28, 4 severe cases and 1 critical case were improved to common and no case was discharged in control group. In meplazumab group, 9 cases (6 severe and 3 critical) were discharged, 2 critical cases were improved to common, and 1 critical case was improved to severe, demonstrating a significantly beneficial outcome compared to control group (p=0.021)'</b> | elevated ALT/AST:<br>2/17 patients; duration 7days, treatment procedure was not affected by their fluctuation |

| <b>Drug therapy (sample size)</b><br><b>[dose, route of administration, frequency, duration; additional therapies]</b>                                                                                                                                                                                                                                                                                          | <b>Effectiveness outcome:</b><br><b>quantitative results;</b><br><b>'study conclusions'</b>                                                                                                                                                                                                                                        | <b>Safety outcome:</b><br><b>quantitative results;</b><br><b>duration, clinical response</b>                                  |
|-----------------------------------------------------------------------------------------------------------------------------------------------------------------------------------------------------------------------------------------------------------------------------------------------------------------------------------------------------------------------------------------------------------------|------------------------------------------------------------------------------------------------------------------------------------------------------------------------------------------------------------------------------------------------------------------------------------------------------------------------------------|-------------------------------------------------------------------------------------------------------------------------------|
| Control (n=11)<br>[lopinavir/ritonavir (n=11); recombinant human interferon alfa-2b (n=11); glucocorticoid (n=7); antibiotic (n=10)]                                                                                                                                                                                                                                                                            | <b>Critical cases (ICU/mechanical ventilation) change from baseline to day 28: 3-&gt;0 patients;</b><br><br><b>Mortality: 0 patients</b>                                                                                                                                                                                           | elevated ALT/AST:<br>1/11 patients; duration 7 days, treatment procedure was not affected by their fluctuation                |
| <b>Study: Borba, 2020</b><br><b>Condition: COVID-19</b>                                                                                                                                                                                                                                                                                                                                                         |                                                                                                                                                                                                                                                                                                                                    |                                                                                                                               |
| High dose chloroquine (n=41)<br>[oral 600mg CQ, 4 × 150mg tablets twice daily for 10 days, total dose 12 g; intravenous ceftriaxone (1 g twice daily for 7 days), azithromycin (500mg once daily for 5 days), systematically, starting on day 0]                                                                                                                                                                | Mortality (day 13): 16 patients;<br><b>'The high-dosage group was associated with lethality (odds ratio, 3.6; 95% CI, 1.2-10.6).</b><br>Despite the small sample size, in an exploratory multivariate analysis, the high-dosage CQ was no longer associated with death when controlled by age (odds ratio, 2.8; 95% CI, 0.9-8.5)." | Decreased hemoglobin: 7/24 patients<br>Creatinine increase: 9/23 patients<br>Creatinine phosphokinase increase: 7/23          |
| Low dose chloroquine (n=40)<br>[oral 450mg CQ; 3 × 150mg and 1 placebo tablet twice daily on day 0, 3 × 150mg plus 1 placebo tablet once a day followed by 4 placebo tablets from day 1 to day 4, 4 placebo tablets twice daily from day 5 to day 9, total dose 2.7 g; intravenous ceftriaxone (1 g twice daily for 7 days) plus azithromycin (500mg once daily for 5 days), systematically, starting on day 0] | Mortality (day 13): 6 patients                                                                                                                                                                                                                                                                                                     | Decreased hemoglobin: 4/18 patients<br>Creatinine increase: 7/19 patients<br>Creatinine phosphokinase increase: 6/19 patients |
| <b>Study: Chen, 2020a</b><br><b>Condition: COVID-19</b>                                                                                                                                                                                                                                                                                                                                                         |                                                                                                                                                                                                                                                                                                                                    |                                                                                                                               |

| <b>Drug therapy (sample size)</b><br><b>[dose, route of administration, frequency, duration; additional therapies]</b>                                                                                                                                                                                                                                              | <b>Effectiveness outcome:</b><br><b>quantitative results;</b><br><b>‘study conclusions’</b>                                                                                                                                                                                                                                      | <b>Safety outcome:</b><br><b>quantitative results;</b><br><b>duration, clinical response</b> |
|---------------------------------------------------------------------------------------------------------------------------------------------------------------------------------------------------------------------------------------------------------------------------------------------------------------------------------------------------------------------|----------------------------------------------------------------------------------------------------------------------------------------------------------------------------------------------------------------------------------------------------------------------------------------------------------------------------------|----------------------------------------------------------------------------------------------|
| Arbidol (n=120)<br>[200mg, three times daily; plus standard care for 7 days, standard care could comprise: Traditional Chinese herbal medicine, antibiotics, antiviral treatment, immunomodulatory drugs, steroids, psychotic drugs, nutrition support, cardiovascular drugs, supportive oxygen, noninvasive positive pressure ventilation or invasive ventilation] | All-cause Mortality: 0 patients                                                                                                                                                                                                                                                                                                  | Total adverse events: 28/120 patients                                                        |
| Favipravir (n=116)<br>[1600mg, twice first day followed by 600mg, twice daily; plus standard care for 7 days, standard care components same as listed above]                                                                                                                                                                                                        | All-cause Mortality: 0 patients;                                                                                                                                                                                                                                                                                                 | Total adverse events: 37/116 patients                                                        |
| <b>Study:</b> Chen, 2020b<br><b>Condition:</b> COVID-19                                                                                                                                                                                                                                                                                                             |                                                                                                                                                                                                                                                                                                                                  |                                                                                              |
| Hydroxychloroquine (n=31)<br>[oral 400 mg/d (200 mg/bid) between days 1 and 5; antiviral agents, antibacterial agents, and immunoglobulin, with or without corticosteroids]                                                                                                                                                                                         | Pneumonia improvement (based on chest CT): 25 patients;<br>‘Surprisingly, a larger proportion of patients with improved pneumonia in the HCQ treatment group (80.6%, 25 of 31) compared with the control group (54.8%, 17 of 31). Besides, 61.3% of patients in the HCQ treatment group had a significant pneumonia absorption.’ | Rash: 1/31 patients<br>Headache: 1/31 patients                                               |

| <b>Drug therapy (sample size)</b><br><b>[dose, route of administration, frequency, duration; additional therapies]</b>                                                                                                                                                                                                                                                                                                                                                                                                                                 | <b>Effectiveness outcome:</b><br><b>quantitative results;</b><br><b>‘study conclusions’</b>                                                                                                                                                                                 | <b>Safety outcome:</b><br><b>quantitative results;</b><br><b>duration, clinical response</b> |
|--------------------------------------------------------------------------------------------------------------------------------------------------------------------------------------------------------------------------------------------------------------------------------------------------------------------------------------------------------------------------------------------------------------------------------------------------------------------------------------------------------------------------------------------------------|-----------------------------------------------------------------------------------------------------------------------------------------------------------------------------------------------------------------------------------------------------------------------------|----------------------------------------------------------------------------------------------|
| Control (n=31)<br>[antiviral agents, antibacterial agents, and immunoglobulin, with or without corticosteroids]                                                                                                                                                                                                                                                                                                                                                                                                                                        | Pneumonia improvement based on chest CT): 17 patients                                                                                                                                                                                                                       | Rash: 0/31 patients<br>Headache: 0/31 patients                                               |
| <b>Study:</b> Fadel, 2020<br><b>Condition:</b> COVID-19                                                                                                                                                                                                                                                                                                                                                                                                                                                                                                |                                                                                                                                                                                                                                                                             |                                                                                              |
| Early corticosteroid treatment (n=132)<br>[Patients with moderate COVID-19 (required $\geq 4$ liters O <sup>2</sup> /min) received IV methylprednisolone 0.5 to 1 mg/kg/day in 2 divided doses for 3 days; Patients in ICU received IV methylprednisolone 0.5 to 1 mg/kg/day in 2 divided doses for 3 to 7 days; methylprednisolone median dose 40mg (IQR 35-50mg); hydroxychloroquine 400 mg twice daily for 2 doses on day 1, followed by 200 mg twice daily on days 2-5 (n=104); empiric antibiotic n=98; lopinavir/ritonavir n=1; tocilizumab n=6] | <b>Escalation from medical ward to ICU: 32 patients</b><br><b>Odds Ratio (v control): 0.47 (95% CI 0.25-0.88, p=0.017)</b><br><b>Respiratory failure requiring mechanical ventilation: 26 patients</b><br><b>Odd Ratio (v control): OR 0.47 (95% CI 0.25-0.92, p=0.025)</b> |                                                                                              |
| Control (n=81)<br>[supportive care with or without a combination of the following: empiric antibiotic n=65, duration median 5 days (IQR 3-5); hydroxychloroquine n=57; lopinavir/ritonavir n=9; remdesivir n=5; tocilizumab n=8; methylprednisolone use n=43, median dose 40mg (IQR 40-50mg), oral prednisone n=5]                                                                                                                                                                                                                                     | <b>Escalation from medical ward to ICU: 31 patients</b><br><b>Respiratory failure requiring mechanical ventilation: 26 patients</b>                                                                                                                                         |                                                                                              |



1  
2  
3  
4  
5  
6  
7  
8  
9  
10  
11  
12  
13  
14  
15  
16  
17  
18  
19  
20  
21  
22  
23  
24  
25  
26  
27  
28  
29  
30  
31  
32  
33  
34  
35  
36  
37  
38  
39  
40  
41  
42  
43  
44  
45  
46  
47

| <b>Drug therapy (sample size)</b><br><b>[dose, route of administration, frequency, duration; additional therapies]</b> | <b>Effectiveness outcome:</b><br><b>quantitative results;</b><br><b>‘study conclusions’</b> | <b>Safety outcome:</b><br><b>quantitative results;</b><br><b>duration, clinical response</b>                                                                                                                                                            |
|------------------------------------------------------------------------------------------------------------------------|---------------------------------------------------------------------------------------------|---------------------------------------------------------------------------------------------------------------------------------------------------------------------------------------------------------------------------------------------------------|
| <b>Study:</b> Hung, 2020<br><b>Condition:</b> COVID-19                                                                 |                                                                                             |                                                                                                                                                                                                                                                         |
| Combination therapy (n=86)<br>[lopinavir-ritonavir + interferon beta-1b]                                               | Required ventilator support: 0 patients<br>30-day mortality: 0 patients                     | Nausea: 30 patients, duration [median (IQR)]: 2 (1-2)<br>Diarrhea: 34 patients, duration [median (IQR)]: 3 (3-3)<br>Increased ALT: 11 patients<br>Hyperbilirubinemia: 4 patients<br>Sinus bradycardia: 3 patients<br>Serious adverse events: 0 patients |
| Control (n=41)<br>[lopinavir-ritonavir]                                                                                | Required ventilator support: 1 patient<br>30-day mortality: 0 patients                      | Nausea: 13 patients, duration [median (IQR)]: 2 (1-2)<br>Diarrhea: 18 patients, duration [median (IQR)]: 3 (3-3)<br>Increased ALT: 7 patients<br>Hyperbilirubinemia: 3 patients<br>Sinus bradycardia: 1 patient<br>Serious adverse events: 1 patient    |
| <b>Study:</b> Li, 2020<br><b>Condition:</b> COVID-19                                                                   |                                                                                             |                                                                                                                                                                                                                                                         |

| <b>Drug therapy (sample size)</b><br><b>[dose, route of administration,</b><br><b>frequency, duration; additional</b><br><b>therapies]</b>                                                                     | <b>Effectiveness outcome:</b><br><b>quantitative results;</b><br><b>‘study conclusions’</b>                                                                                                                                                                                                                                                                                                                                                                                                                                                                                                                                                                                                                                                                                                                                                                                                                                                                                             | <b>Safety outcome:</b><br><b>quantitative results;</b><br><b>duration, clinical response</b>                                 |
|----------------------------------------------------------------------------------------------------------------------------------------------------------------------------------------------------------------|-----------------------------------------------------------------------------------------------------------------------------------------------------------------------------------------------------------------------------------------------------------------------------------------------------------------------------------------------------------------------------------------------------------------------------------------------------------------------------------------------------------------------------------------------------------------------------------------------------------------------------------------------------------------------------------------------------------------------------------------------------------------------------------------------------------------------------------------------------------------------------------------------------------------------------------------------------------------------------------------|------------------------------------------------------------------------------------------------------------------------------|
| <p>Arbidol (n=35)<br/>           [arbidol (100mg), orally administered, 200mg three times daily for 7-14 days; All three groups were treated with supportive care and effective oxygen therapy if in need]</p> | <p>Deterioration in clinical status - requiring ICU monitoring or mechanical ventilation (7 days): 3 patients;</p> <p>'At day 7, eight (23.5%) patients in the LPV/r group, 3 (8.6%) in the arbidol group and 2(11.8%) in the control group deteriorated from mild/moderate clinical status to severe/critical clinical status, without statistical difference (P =0.206)...In order to rule out the influence of the time from onset to treatment on the clinical status, we compared the time from onset to treatment in patients who deteriorated to severe/critical clinical status [5 (IQR 2, 8) days] with those who did not [4 (IQR 2, 7) days], and did not find any significant difference between them (P =0.619)'</p> <p>Mortality: 0 patients;</p> <p>Evidence of pneumonia based on chest CT imaging: 33 patients;</p> <p>'The results showed that LPV/r and arbidol did not...improve the symptoms of COVID-19 or pneumonia on lung CT imaging at 7 days and 14 days'</p> | <p>Diarrhea: 3/35 patients<br/>           Nausea: 2/35 patients<br/>           ALT enzymes &gt;2.5 normal: 0/34 patients</p> |

| <b>Drug therapy (sample size)</b><br><b>[dose, route of administration, frequency, duration; additional therapies]</b>                                                                                        | <b>Effectiveness outcome:</b><br><b>quantitative results;</b><br><b>‘study conclusions’</b>                                                                                                                    | <b>Safety outcome:</b><br><b>quantitative results;</b><br><b>duration, clinical response</b>         |
|---------------------------------------------------------------------------------------------------------------------------------------------------------------------------------------------------------------|----------------------------------------------------------------------------------------------------------------------------------------------------------------------------------------------------------------|------------------------------------------------------------------------------------------------------|
| Lopinavir/ritonavir (n=34)<br>[lopinavir (200mg)/ritonavir (50mg); orally administered twice daily for 7-14 days; all three groups were treated with supportive care and effective oxygen therapy if in need] | Deterioration in clinical status - requiring ICU monitoring or mechanical ventilation (7 days): 8 patients<br><br>Mortality: 0 patients<br><br>Evidence of pneumonia based on chest CT imaging: 28 patients    | Diarrhea: 9/34 patients<br>Loss of appetite: 5/34 patients<br>ALT enzymes >2.5 normal: 1/34 patients |
| Control (n=17)<br>[patients were not given any antiviral therapy, all three groups were treated with supportive care and effective oxygen therapy if in need]                                                 | Deterioration in clinical status - requiring ICU monitoring or mechanical ventilation (7 days): 2 patients;<br><br>Mortality: 0 patients;<br><br>Evidence of pneumonia based on chest CT imaging: 14 patients; | Diarrhea: 0/34 patients<br>Loss of appetite: 0/34 patients<br>ALT enzymes >2.5 normal: 0/34 patients |
| <b>Study:</b> Tang, 2020<br><b>Condition:</b> COVID-19                                                                                                                                                        |                                                                                                                                                                                                                |                                                                                                      |

| <b>Drug therapy (sample size)</b><br><b>[dose, route of administration, frequency, duration; additional therapies]</b>                                                                                                                                                                                                                                                                                 | <b>Effectiveness outcome:</b><br><b>quantitative results;</b><br><b>‘study conclusions’</b> | <b>Safety outcome:</b><br><b>quantitative results;</b><br><b>duration, clinical response</b>                                                 |
|--------------------------------------------------------------------------------------------------------------------------------------------------------------------------------------------------------------------------------------------------------------------------------------------------------------------------------------------------------------------------------------------------------|---------------------------------------------------------------------------------------------|----------------------------------------------------------------------------------------------------------------------------------------------|
| Hydroxychloroquine (n=75)<br>[loading dose of 1200 mg daily for three days followed by a maintained dose of 800 mg daily, total treatment duration: 2 or 3 weeks for mild/moderate or severe patients, respectively; additional antiviral agents (47): arbidol (37), virazole (13), lopinavir–ritonavir (13), oseltamivir (8), entecavir (1); Antibiotics (32); Systemic glucocorticoid treatment (6)] |                                                                                             | Any adverse event*: 21/70;<br>Serious adverse event: 2/70<br><br>*Multiple occurrences of the same adverse event in one patient were counted |
| Control (n=75)<br>[Standard care (including, not limited to): antiviral agents (48): arbidol (33), virazole (15), lopinavir–ritonavir (12), oseltamivir (9), entecavir (1); Antibiotics (27); Systemic glucocorticoid treatment (4)]                                                                                                                                                                   |                                                                                             | Any adverse event*: 7/80<br>Serious adverse event: 0/80<br><br>*Multiple occurrences of the same adverse event in one patient were counted   |
| <b>Study:</b> Wang, 2020a<br><b>Condition:</b> COVID-19                                                                                                                                                                                                                                                                                                                                                |                                                                                             |                                                                                                                                              |

1  
2  
3  
4  
5  
6  
7  
8  
9  
10  
11  
12  
13  
14  
15  
16  
17  
18  
19  
20  
21  
22  
23  
24  
25  
26  
27  
28  
29  
30  
31  
32  
33  
34  
35  
36  
37  
38  
39  
40  
41  
42  
43  
44  
45  
46  
47

| <b>Drug therapy (sample size)</b><br><b>[dose, route of administration, frequency, duration; additional therapies]</b>                                                                                                                                                              | <b>Effectiveness outcome:</b><br><b>quantitative results;</b><br><b>‘study conclusions’</b>                                                                                                                                                                                                                                                                                                                     | <b>Safety outcome:</b><br><b>quantitative results;</b><br><b>duration, clinical response</b>               |
|-------------------------------------------------------------------------------------------------------------------------------------------------------------------------------------------------------------------------------------------------------------------------------------|-----------------------------------------------------------------------------------------------------------------------------------------------------------------------------------------------------------------------------------------------------------------------------------------------------------------------------------------------------------------------------------------------------------------|------------------------------------------------------------------------------------------------------------|
| Remdesivir (n=158)<br>[intravenous, 200 mg on day 1 followed by 100 mg on days 2–10 in single daily infusions; interferon alfa-2b at baseline (n=29), lopinavir–ritonavir at baseline (n=27), Antibiotic treatment at baseline (n=121), Corticosteroids therapy at baseline (n=60)] | Patients requiring extracorporeal membrane oxygenation or invasive mechanical ventilation at study end (day 28): 2/150 patients;<br><br>‘Our trial found that intravenous remdesivir did not significantly improve the time to clinical improvement, mortality, or time to clearance of virus in patients with serious COVID-19 compared with placebo.’<br><br>Mortality at study end (day 28): 22/150 patients | Any adverse event <sup>1</sup> : 102/155 patients<br>Serious adverse events <sup>2</sup> : 28/155 patients |
| Placebo (n=78)<br>[same volume of placebo infusions for a total of 10 days; interferon alfa-2b at baseline (n=15), lopinavir–ritonavir at baseline (n=15), Antibiotic treatment at baseline (n=63), Corticosteroids therapy at baseline (n=31)]                                     | Patients requiring extracorporeal membrane oxygenation or invasive mechanical ventilation at study end (day 28): 3/77 patients;<br><br>Mortality at study end (day 28): 10/77 patients                                                                                                                                                                                                                          | Any adverse event <sup>1</sup> : 50/78 patients<br>Serious adverse events <sup>2</sup> : 20/78             |
| <i>Cohort Studies n=19</i>                                                                                                                                                                                                                                                          |                                                                                                                                                                                                                                                                                                                                                                                                                 |                                                                                                            |
| <b>Study:</b> Deng, 2020<br><b>Condition:</b> COVID-19                                                                                                                                                                                                                              |                                                                                                                                                                                                                                                                                                                                                                                                                 |                                                                                                            |

| <b>Drug therapy (sample size)</b><br><b>[dose, route of administration, frequency, duration; additional therapies]</b>                                                                                                                                                                                | <b>Effectiveness outcome:</b><br><b>quantitative results;</b><br><b>‘study conclusions’</b>                                                                                                                                                                                                                                                                                  | <b>Safety outcome:</b><br><b>quantitative results;</b><br><b>duration, clinical response</b> |
|-------------------------------------------------------------------------------------------------------------------------------------------------------------------------------------------------------------------------------------------------------------------------------------------------------|------------------------------------------------------------------------------------------------------------------------------------------------------------------------------------------------------------------------------------------------------------------------------------------------------------------------------------------------------------------------------|----------------------------------------------------------------------------------------------|
| Arbidol + lopinavir ritonavir (n=16)<br>[arbidol 200 mg every 8h, lopinavir (400 mg)/ritonavir (100 mg) orally every 12 h, duration approximately 5–21 days; all patients received Immunoglobulin therapy, some received broad-spectrum antibacterial therapy (n=20) or corticosteroid therapy (n=1)] | <b>Pneumonia improvement based on chest CT: 11 patients;</b><br><b>‘Chest CT scans were improving for 11 (69%) of 16 patients in the combination group after 7 days, compared with 5 (29%) of 17 in the monotherapy group (p&lt;0.05)’</b>                                                                                                                                   |                                                                                              |
| Lopinavir/ritonavir (n=17)<br>[lopinavir (400 mg)/ritonavir (100 mg) orally every 12 h duration approximately 5–21 days; all patients received Immunoglobulin therapy, some received broad-spectrum antibacterial therapy (n=20) or corticosteroid therapy (n=7)]                                     | <b>Pneumonia improvement based on chest CT: 5 patients</b>                                                                                                                                                                                                                                                                                                                   |                                                                                              |
| <b>Study: Estebanez, 2020</b><br><b>Condition: COVID-19</b>                                                                                                                                                                                                                                           |                                                                                                                                                                                                                                                                                                                                                                              |                                                                                              |
| Interferon beta-1b (n=106)<br>[subcutaneous injection at a dose of 250 µg on alternate days. Patients included in the interferon group had received at least one dose; Hydroxychloroquine (101); Lopinavir/ritonavir (47); Azythromycin (64); Corticosteroids (24); Tocilizumab (3)]                  | Overall mortality: 22 patients (p=0.229)<br>In the multivariate analysis age (older than 65 years old), clinical severity at admission, and not have received hydroxychloroquine were significantly associated with in-hospital mortality (Table 2). The interferon treatment was not associated with survival benefit neither univariate analysis nor multivariate analysis |                                                                                              |

1  
2  
3  
4  
5  
6  
7  
8  
9  
10  
11  
12  
13  
14  
15  
16  
17  
18  
19  
20  
21  
22  
23  
24  
25  
26  
27  
28  
29  
30  
31  
32  
33  
34  
35  
36  
37  
38  
39  
40  
41  
42  
43  
44  
45  
46  
47

| <b>Drug therapy (sample size)</b><br><b>[dose, route of administration, frequency, duration; additional therapies]</b>                            | <b>Effectiveness outcome:</b><br><b>quantitative results;</b><br><b>‘study conclusions’</b>                                                                               | <b>Safety outcome:</b><br><b>quantitative results;</b><br><b>duration, clinical response</b>                                                                                                            |
|---------------------------------------------------------------------------------------------------------------------------------------------------|---------------------------------------------------------------------------------------------------------------------------------------------------------------------------|---------------------------------------------------------------------------------------------------------------------------------------------------------------------------------------------------------|
| Control (n=150)<br>[Hydroxychloroquine (96); Lopinavir/ritonavir (45); Azythromycin (94); Corticosteroids (42); Tocilizumab (2)]                  | Overall mortality: 41 patients                                                                                                                                            |                                                                                                                                                                                                         |
| <b>Study: Kim, 2020</b><br><b>Condition: COVID-19</b>                                                                                             |                                                                                                                                                                           |                                                                                                                                                                                                         |
| Lopinavir/ritonavir (n=35)<br>[lopinavir 200mg/ritonavir 50mg twice daily; azithromycin 500 mg once daily for 3 days, cefixime 100mg twice daily] | Referral to tertiary hospital or ICU: 4 patients<br>Lopinavir/ritonavir v Hydroxychloroquine: p=0.375<br>All three treatment groups: p=0.189<br><br>Mortality: 0 patients | Nausea/vomiting: 4 patients<br>Abdominal discomfort/diarrhea: 3 patients<br>Tachycardia: 0 patients<br>Increased total bilirubin: 0 patients<br>Elevated BUN: 1 patient<br>Elevated AST/ALT: 4 patients |
| Hydroxychloroquine (n=22)<br>[200 mg hcq tablets twice daily; azithromycin 500 mg once daily for 3 days, cefixime 100mg twice daily]              | Referral to tertiary hospital or ICU: 4 patients<br><br>Mortality: 0 patients                                                                                             | Nausea/vomiting: 2 patients<br>Abdominal discomfort/diarrhea: 1 patient<br>Tachycardia: 1 patient<br>Increased total bilirubin: 1 patient<br>Elevated BUN: 0 patients<br>Elevated AST/ALT: 4 patients   |

| <b>Drug therapy (sample size)</b><br><b>[dose, route of administration, frequency, duration; additional therapies]</b>                                        | <b>Effectiveness outcome:</b><br><b>quantitative results;</b><br><b>‘study conclusions’</b> | <b>Safety outcome:</b><br><b>quantitative results;</b><br><b>duration, clinical response</b>                                                                                                            |
|---------------------------------------------------------------------------------------------------------------------------------------------------------------|---------------------------------------------------------------------------------------------|---------------------------------------------------------------------------------------------------------------------------------------------------------------------------------------------------------|
| Conservative treatment (n=40)<br>[azithromycin 500 mg once daily for 3 days, cefixime 100mg twice daily]                                                      | Referral to tertiary hospital or ICU: 0 patients<br><br>Mortality: 0 patients               | Nausea/vomiting: 0 patients<br>Abdominal discomfort/diarrhea: 0 patients<br>Tachycardia: 0 patients<br>Increased total bilirubin: 0 patients<br>Elevated BUN: 0 patients<br>Elevated AST/ALT: 1 patient |
| <b>Study:</b> Lan, 2020<br><b>Condition:</b> COVID-19                                                                                                         |                                                                                             |                                                                                                                                                                                                         |
| Lopinavir/ritonavir (n=34)<br>[lopinavir-ritonavir (400 mg and 100mg, orally) twice daily]                                                                    | Transferred to ICU: 0 patients<br><br>Mortality: 1 patient                                  |                                                                                                                                                                                                         |
| Lopinavir/ritonavir + Arbidol (n=39)<br>[lopinavir-ritonavir (400 mg and 100mg, orally) twice daily combined with arbidol (200 mg, orally) three times a day] | Transferred to ICU: 2 patients<br><br>Mortality: 1 patient                                  |                                                                                                                                                                                                         |
| <b>Study:</b> Lian, 2020<br><b>Condition:</b> COVID-19                                                                                                        |                                                                                             |                                                                                                                                                                                                         |
| Umifenovir (n=45)<br>[0.2 gram three times a day; some patients were given umifenovir for five days (n=8) and the rest for 7-10 days (n=37)]                  |                                                                                             | Digestive symptoms (diarrhea and nausea): 5/45 patients                                                                                                                                                 |



| <b>Drug therapy (sample size)</b><br><b>[dose, route of administration, frequency, duration; additional therapies]</b>                                                                                                                                            | <b>Effectiveness outcome:</b><br><b>quantitative results;</b><br><b>‘study conclusions’</b>                                                                                                                                                 | <b>Safety outcome:</b><br><b>quantitative results;</b><br><b>duration, clinical response</b> |
|-------------------------------------------------------------------------------------------------------------------------------------------------------------------------------------------------------------------------------------------------------------------|---------------------------------------------------------------------------------------------------------------------------------------------------------------------------------------------------------------------------------------------|----------------------------------------------------------------------------------------------|
| Control (n=36)<br>[Not reported]                                                                                                                                                                                                                                  |                                                                                                                                                                                                                                             | Digestive symptoms (diarrhea and nausea): 3/36 patients                                      |
| <b>Study: Lu, 2020</b><br><b>Condition: COVID-19</b>                                                                                                                                                                                                              |                                                                                                                                                                                                                                             |                                                                                              |
| Adjuvant corticosteroid therapy (n=151)<br>[hydrocortisone-equivalent dosage range: 100-800mg/d, median (IQR) administration duration was 8 (4-12) days; antiviral therapy (e.g., oseltamivir, arbidol, lopinavir/ritonavir, ganciclovir, interferon- $\alpha$ )] | Mortality: NR<br>‘Multivariate analysis that adjusted for major mortality-associated variables and propensity score indicated that corticosteroid treatment was independent from overall mortality (adjusted OR: 1.05; 95% CI: -1.92-2.01)’ |                                                                                              |
| Antiviral therapy only (n=93)<br>[oseltamivir, arbidol, lopinavir/ritonavir, ganciclovir, interferon- $\alpha$ ]                                                                                                                                                  | Mortality: NR                                                                                                                                                                                                                               |                                                                                              |
| <b>Study: Magagnoli, 2020</b><br><b>Condition: COVID-19</b>                                                                                                                                                                                                       |                                                                                                                                                                                                                                             |                                                                                              |

| <b>Drug therapy (sample size)</b><br><b>[dose, route of administration, frequency, duration; additional therapies]</b> | <b>Effectiveness outcome:</b><br><b>quantitative results;</b><br><b>'study conclusions'</b>                                                                                                                                                                                                                                                                                                                                                                                                                                                                                                                                                                                                                                                                                                                                | <b>Safety outcome:</b><br><b>quantitative results;</b><br><b>duration, clinical response</b> |
|------------------------------------------------------------------------------------------------------------------------|----------------------------------------------------------------------------------------------------------------------------------------------------------------------------------------------------------------------------------------------------------------------------------------------------------------------------------------------------------------------------------------------------------------------------------------------------------------------------------------------------------------------------------------------------------------------------------------------------------------------------------------------------------------------------------------------------------------------------------------------------------------------------------------------------------------------------|----------------------------------------------------------------------------------------------|
| Hydroxychloroquine (n=97)<br>[Not reported]                                                                            | Mechanical ventilation: 12 patients;<br>'We did not observe a significant difference in the risk of ventilation in either the HC group (adjusted HR, 1.43; 95% CI, 0.53 to 3.79; P=0.48) or the HC+AZ group (adjusted HR, 0.43; 95% CI, 0.16 to 1.12; P=0.09), compared to the no HC group'<br>Mortality: 27 patients;<br><b>'Compared to the no HC group, there was a higher risk of death from any cause in the HC group (adjusted HR, 2.61; 95% CI, 1.10 to 6.17; P=0.03) but not in the HC+AZ group (adjusted HR, 1.14; 95% CI, 0.56 to 2.32; P=0.72)...No significant difference was observed in the risk of death after ventilation in either the HC group (adjusted HR, 4.08; 95% CI, 0.77 to 21.70; P=0.10) or the HC+AZ group (adjusted HR, 1.20; 95% CI, 0.25 to 5.77; P=0.82), compared to the no HC group'</b> |                                                                                              |
| Hydroxychloroquine + azithromycin (n=113)<br>[Not reported]                                                            | Mechanical ventilation: 7 patients<br>Mortality: 25 patients                                                                                                                                                                                                                                                                                                                                                                                                                                                                                                                                                                                                                                                                                                                                                               |                                                                                              |
| No hydroxychloroquine (n=158)<br>[Not reported]                                                                        | Mechanical ventilation: 25 patients<br>Mortality: 18 patients                                                                                                                                                                                                                                                                                                                                                                                                                                                                                                                                                                                                                                                                                                                                                              |                                                                                              |

1  
2  
3  
4  
5  
6  
7  
8  
9  
10  
11  
12  
13  
14  
15  
16  
17  
18  
19  
20  
21  
22  
23  
24  
25  
26  
27  
28  
29  
30  
31  
32  
33  
34  
35  
36  
37  
38  
39  
40  
41  
42  
43  
44  
45  
46  
47

| <b>Drug therapy (sample size)</b><br><b>[dose, route of administration, frequency, duration; additional therapies]</b>                     | <b>Effectiveness outcome:</b><br><b>quantitative results;</b><br><b>‘study conclusions’</b>                                                                                                                                                                                                                                                                                                                                  | <b>Safety outcome:</b><br><b>quantitative results;</b><br><b>duration, clinical response</b>          |
|--------------------------------------------------------------------------------------------------------------------------------------------|------------------------------------------------------------------------------------------------------------------------------------------------------------------------------------------------------------------------------------------------------------------------------------------------------------------------------------------------------------------------------------------------------------------------------|-------------------------------------------------------------------------------------------------------|
| <b>Study:</b> Mahévas, 2020                                                                                                                |                                                                                                                                                                                                                                                                                                                                                                                                                              |                                                                                                       |
| <b>Condition:</b> COVID-19                                                                                                                 |                                                                                                                                                                                                                                                                                                                                                                                                                              |                                                                                                       |
| Hydroxychloroquine (n=84)<br>[600 mg in the first 48 hours after hospitalisation; azithromycin (n=17), amoxicillin/clavulanic acid (n=64)] | Death or transfer to ICU: 16 patients;<br>‘In the weighted analysis, 20.2% patients in the HCQ group were transferred to the ICU or died within 7 days vs 22.1% in the no-HCQ group (16 vs 21 events, relative risk [RR] 0.91, 95% CI 0.47–1.80).’<br><br>Day 7 Mortality: 3 patients;<br>‘In the HCQ group, 2.8% of the patients died within 7 days vs 4.6% in the no-HCQ group (3 vs 4 events, RR 0.61, 95% CI 0.13–2.89)’ |                                                                                                       |
| Control (n=97)<br>[Standard care (unspecified)]                                                                                            | Death or transfer to ICU: 21 patients<br><br>Day 7 Mortality: 4 patients                                                                                                                                                                                                                                                                                                                                                     |                                                                                                       |
| <b>Study:</b> Mercurio, 2020                                                                                                               |                                                                                                                                                                                                                                                                                                                                                                                                                              |                                                                                                       |
| <b>Condition:</b> COVID-19                                                                                                                 |                                                                                                                                                                                                                                                                                                                                                                                                                              |                                                                                                       |
| Hydroxychloroquine (n=37)<br>[400mg of hydroxychloroquine twice on day 1, then 400 mg daily on days 2 through 5]                           |                                                                                                                                                                                                                                                                                                                                                                                                                              | QTc prolongation developed into torsades de pointes and other ventricular arrhythmias: 10/37 patients |

| <b>Drug therapy (sample size)</b><br><b>[dose, route of administration, frequency, duration; additional therapies]</b>                                                                              | <b>Effectiveness outcome:</b><br><b>quantitative results;</b><br><b>‘study conclusions’</b>                                                                                                                                                                                                                                                                                                                                                                                                                                                                                                            | <b>Safety outcome:</b><br><b>quantitative results;</b><br><b>duration, clinical response</b>          |
|-----------------------------------------------------------------------------------------------------------------------------------------------------------------------------------------------------|--------------------------------------------------------------------------------------------------------------------------------------------------------------------------------------------------------------------------------------------------------------------------------------------------------------------------------------------------------------------------------------------------------------------------------------------------------------------------------------------------------------------------------------------------------------------------------------------------------|-------------------------------------------------------------------------------------------------------|
| Hydroxychloroquine and azithromycin (n=53)<br>[400mg of hydroxychloroquine twice on day 1, then 400 mg daily on days 2 through 5 and azithromycin]                                                  |                                                                                                                                                                                                                                                                                                                                                                                                                                                                                                                                                                                                        | QTc prolongation developed into torsades de pointes and other ventricular arrhythmias: 18/53 patients |
| <b>Study:</b> Rosenberg, 2020<br><b>Condition:</b> COVID-19                                                                                                                                         |                                                                                                                                                                                                                                                                                                                                                                                                                                                                                                                                                                                                        |                                                                                                       |
| Hydroxychloroquine + azithromycin (n=735)<br>[Hydroxychloroquine was initiated at a median of 1 day (Q1-Q3, 1-2) following admission and azithromycin was given at a median of 0 days (Q1-Q3, 0-1)] | Mechanical ventilation required after treatment initiation: 94 patients (27.1%)<br>ICU admission after treatment initiation: 226 patients (30.7%)<br>Mortality: 189 patients<br>Following adjustment for demographics, specific hospital, preexisting conditions, and illness severity, no significant differences in mortality were found between patients receiving hydroxychloroquine + azithromycin (adjusted HR, 1.35 [95% CI, 0.76-2.40]), hydroxychloroquine alone (adjusted HR, 1.08[95%CI,0.63-1.85]), or azithromycin alone (adjusted HR,0.56 [95%CI,0.26-1.21]), compared with neither drug | Abnormal ECG findings (compared to control): odds ratio 1.55 (95% CI 0.89-2.67)                       |

| <b>Drug therapy (sample size)</b><br><b>[dose, route of administration, frequency, duration; additional therapies]</b> | <b>Effectiveness outcome:</b><br><b>quantitative results;</b><br><b>‘study conclusions’</b>                                                                                                                                                   | <b>Safety outcome:</b><br><b>quantitative results;</b><br><b>duration, clinical response</b> |
|------------------------------------------------------------------------------------------------------------------------|-----------------------------------------------------------------------------------------------------------------------------------------------------------------------------------------------------------------------------------------------|----------------------------------------------------------------------------------------------|
| Hydroxychloroquine (n=271)<br>[Hydroxychloroquine was initiated at a median of 1 day (Q1-Q3, 1-2) following admission] | Mechanical ventilation required after treatment initiation: 31 patients (18.8%)<br>ICU admission after treatment initiation: 52 patients (19.2%)                                                                                              | Abnormal ECG findings (compared to control): odds ratio 1.50 (95% CI 0.88-2.58)              |
| Azithromycin (n=211)<br>[azithromycin was given at a median of 0 days (Q1-Q3, 0-1)]                                    | Mechanical ventilation required after treatment initiation: 5 patients (6.2%)<br>ICU admission after treatment initiation: 23 patients (10.9%)                                                                                                | Abnormal ECG findings (compared to control): odds ratio 0.95 (95% CI 0.47-1.94)              |
| Control (n=221)<br>[unspecified]                                                                                       | Mechanical ventilation required after treatment initiation: 18 patients (8.1%)<br>ICU admission after treatment initiation: 27 patients (12.2%)                                                                                               | Abnormal ECG findings (compared to control): odds ratio 1.58 (95% CI 0.77-3.24)              |
| <b>Study:</b> Shao, 2020<br><b>Condition:</b> COVID-19                                                                 |                                                                                                                                                                                                                                               |                                                                                              |
| Intravenous immunoglobulin (n=174)<br>[>15 g/day or ≤15 g/day]                                                         | 60-day Mortality: 33 patients;<br>'There was no significant difference in 28-day and 60-day mortality between the IVIG group and non-IVIG group (P=0.872 and P=0.222, respectively), and no significant difference in survival time (P=0.225) |                                                                                              |
| Control (n=151)<br>[Not reported]                                                                                      | 60-day Mortality: 21 patients                                                                                                                                                                                                                 |                                                                                              |

| <b>Drug therapy (sample size)</b><br><b>[dose, route of administration,</b><br><b>frequency, duration; additional</b><br><b>therapies]</b> | <b>Effectiveness outcome:</b><br><b>quantitative results;</b><br><b>‘study conclusions’</b>                                                                                                                                                                                                                                     | <b>Safety outcome:</b><br><b>quantitative results;</b><br><b>duration, clinical response</b> |
|--------------------------------------------------------------------------------------------------------------------------------------------|---------------------------------------------------------------------------------------------------------------------------------------------------------------------------------------------------------------------------------------------------------------------------------------------------------------------------------|----------------------------------------------------------------------------------------------|
| <b>Study:</b> Singh, 2020<br><b>Condition:</b> COVID-19                                                                                    |                                                                                                                                                                                                                                                                                                                                 |                                                                                              |
| Hydroxychloroquine (n=910)<br>[Not reported]                                                                                               | Mechanical ventilation: 46 patients<br>Relative risk (vs control): 0.81 (95% CI 0.55 to 1.18)<br>Risk difference (vs control): -1.21% (95% CI -3.33% to 0.91%)<br><br>30-day mortality: 104 patients<br>Relative risk (vs control): 0.95 (95% CI 0.74 to 1.23)<br>Risk difference (vs control): -0.55% (95% CI -3.50% to 2.40%) |                                                                                              |
| Control (n=910)<br>[Not reported]                                                                                                          | Mechanical ventilation: 57 patients<br><br>30-day mortality: 109 patients                                                                                                                                                                                                                                                       |                                                                                              |
| <b>Study:</b> Wadud, 2020<br><b>Condition:</b> COVID-19                                                                                    |                                                                                                                                                                                                                                                                                                                                 |                                                                                              |

1  
2  
3  
4  
5  
6  
7  
8  
9  
10  
11  
12  
13  
14  
15  
16  
17  
18  
19  
20  
21  
22  
23  
24  
25  
26  
27  
28  
29  
30  
31  
32  
33  
34  
35  
36  
37  
38  
39  
40  
41  
42  
43  
44  
45  
46  
47

| <b>Drug therapy (sample size)</b><br><b>[dose, route of administration, frequency, duration; additional therapies]</b>                                                                  | <b>Effectiveness outcome:</b><br><b>quantitative results;</b><br><b>‘study conclusions’</b>                                                                                                                                                                                                     | <b>Safety outcome:</b><br><b>quantitative results;</b><br><b>duration, clinical response</b> |
|-----------------------------------------------------------------------------------------------------------------------------------------------------------------------------------------|-------------------------------------------------------------------------------------------------------------------------------------------------------------------------------------------------------------------------------------------------------------------------------------------------|----------------------------------------------------------------------------------------------|
| Tocilizumab (n=44)<br>[Not reported]                                                                                                                                                    | <b>Survival rate: 61.36%</b><br><b>Survival rate was much lower at 48 % in the control group and 61.36 % in patients who received Tocilizumab with significant P value of &lt; 0.00001. The number needed to treat (NNT) was 7.48, if we treat 8 patients with Tocilizumab, 1 will not die.</b> |                                                                                              |
| Control (n=50)<br>[Not reported]                                                                                                                                                        | <b>Survival rate: 48%</b>                                                                                                                                                                                                                                                                       |                                                                                              |
| <b>Study: Wang, 2020b</b><br><b>Condition: COVID-19</b>                                                                                                                                 |                                                                                                                                                                                                                                                                                                 |                                                                                              |
| Lopinavir/ritonavir (n=20)<br>[a-interferon, immunoenhancement therapy (thymosin)]                                                                                                      | Mortality: 1 patient                                                                                                                                                                                                                                                                            |                                                                                              |
| Methylprednisolone (n=26)<br>[1- 2mg/kg/d for 5-7 days via intravenous injection; antiviral therapy(a-interferon, Kaletra [lopinavir/ritonavir]), immunoenhancement therapy (thymosin)] | Mortality: 2 patients                                                                                                                                                                                                                                                                           |                                                                                              |
| <b>Study: Wu, 2020</b><br><b>Condition: COVID-19</b>                                                                                                                                    |                                                                                                                                                                                                                                                                                                 |                                                                                              |

| <b>Drug therapy (sample size)</b><br><b>[dose, route of administration, frequency, duration; additional therapies]</b>                                                                               | <b>Effectiveness outcome:</b><br><b>quantitative results;</b><br><b>‘study conclusions’</b>                                                                                                                                                                                                                                                                                                                                                                                                                                                                                                                                                               | <b>Safety outcome:</b><br><b>quantitative results;</b><br><b>duration, clinical response</b> |
|------------------------------------------------------------------------------------------------------------------------------------------------------------------------------------------------------|-----------------------------------------------------------------------------------------------------------------------------------------------------------------------------------------------------------------------------------------------------------------------------------------------------------------------------------------------------------------------------------------------------------------------------------------------------------------------------------------------------------------------------------------------------------------------------------------------------------------------------------------------------------|----------------------------------------------------------------------------------------------|
| Corticosteroid (n=983)<br>[Accumulative corticosteroid dose, mg: 280.0 (140.0, 480.0); Duration of corticosteroid use, d: 6.0 (3.0, 10.0); Daily average corticosteroid dose, mg: 40.0 (37.3, 57.1)] | <b>28-day mortality: 83 patients</b><br><b>For all 1514 severe cases, we analysed the factors associated with in-hospital mortality. Kaplan-Meier survival curve showed that in-hospital mortality was significantly higher in the corticosteroid use group than in the no corticosteroid use group (log-rank test p&lt;0.001). The 28-day in-hospital mortality was 20.6% (95% CI: 16.5%-25.6%) in the corticosteroid use group while 3.7% (95% CI: 2.3%-6.0%) for no corticosteroid use...In the multivariable Cox model, systemic corticosteroid use was independently associated with in-hospital mortality (HR=1.77, 95% CI: 1.08-2.89, p=0.023)</b> |                                                                                              |
| No corticosteroid (n=531)<br>[Not reported]                                                                                                                                                          | <b>28-day mortality: 26 patients</b>                                                                                                                                                                                                                                                                                                                                                                                                                                                                                                                                                                                                                      |                                                                                              |
| <b>Study:</b> Yu, 2020<br><b>Condition:</b> COVID-19                                                                                                                                                 |                                                                                                                                                                                                                                                                                                                                                                                                                                                                                                                                                                                                                                                           |                                                                                              |
| Hydroxychloroquine (n=48)<br>[oral 200 mg twice per day for 7-10 days]                                                                                                                               | <b>Mortality: 9 patients</b><br><b>‘In total of 568 patients, 247 patients died (mortality was 43.5%). Nine out of 48 HCQ patients (18.8%) died, while in NHCQ group, 238/520 (45.8%) patients died (p&lt;0.001)’</b>                                                                                                                                                                                                                                                                                                                                                                                                                                     |                                                                                              |



1  
2  
3  
4  
5  
6  
7  
8  
9  
10  
11  
12  
13  
14  
15  
16  
17  
18  
19  
20  
21  
22  
23  
24  
25  
26  
27  
28  
29  
30  
31  
32  
33  
34  
35  
36  
37  
38  
39  
40  
41  
42  
43  
44  
45  
46  
47

| <b>Drug therapy (sample size)</b><br><b>[dose, route of administration, frequency, duration; additional therapies]</b>                                                                                                                 | <b>Effectiveness outcome:</b><br><b>quantitative results;</b><br><b>‘study conclusions’</b> | <b>Safety outcome:</b><br><b>quantitative results;</b><br><b>duration, clinical response</b> |
|----------------------------------------------------------------------------------------------------------------------------------------------------------------------------------------------------------------------------------------|---------------------------------------------------------------------------------------------|----------------------------------------------------------------------------------------------|
| Control (n=520)<br>[antiviral drugs: Lopinavir and Ritonavir, Entecavir hydrate, or Ribavirin]                                                                                                                                         | <b>Mortality: 238 patients</b>                                                              |                                                                                              |
| <b>Study: Zeng, 2020</b><br><b>Condition: COVID-19</b>                                                                                                                                                                                 |                                                                                             |                                                                                              |
| Convalescent plasma (n=6)<br>[volume [median (IQR)] 300mL (200mL to 600mL), one dose (n=3), two doses (n=3); Antibiotics (n=6), Antiviral therapy (n=4), Intravenous immunoglobulin therapy (n=5), Glucocorticoid pulse therapy (n=4)] | Mortality: 5 patients, p=0.500                                                              | None reported                                                                                |
| Control (n=15)<br>[Antibiotics (n=15), Antiviral therapy (n=12), Intravenous immunoglobulin therapy (n=14), Glucocorticoid pulse therapy (n=12)]                                                                                       | Mortality: 14 patients                                                                      | None reported                                                                                |
| <b>Study: Zha, 2020</b><br><b>Condition: COVID-19</b>                                                                                                                                                                                  |                                                                                             |                                                                                              |

| <b>Drug therapy (sample size)</b><br><b>[dose, route of administration, frequency, duration; additional therapies]</b>                                                                                                                                                                                                                                                                                                                                             | <b>Effectiveness outcome:</b><br><b>quantitative results;</b><br><b>‘study conclusions’</b> | <b>Safety outcome:</b><br><b>quantitative results;</b><br><b>duration, clinical response</b> |
|--------------------------------------------------------------------------------------------------------------------------------------------------------------------------------------------------------------------------------------------------------------------------------------------------------------------------------------------------------------------------------------------------------------------------------------------------------------------|---------------------------------------------------------------------------------------------|----------------------------------------------------------------------------------------------|
| Corticosteroid (n=20)<br>[40 mg methylprednisolone once or twice per day (n=11) within 24 hours of admission for a median 5 days (IQR, 4.5–5.0 days); Moxifloxacin (n=6), duration [median (IQR)] 7 (5.5–7) days, lopinavir/ritonavir and interferon alfa (n=16), umifenovir and lopinavir/ritonavir and interferon alfa (n=4), duration of interferon alfa (days), [median (IQR)] 14.5 (10.5–17), duration of antiviral drug (days), [median (IQR)] 10 (7.75–13)] | Mortality: 0 patients                                                                       |                                                                                              |
| Control (n=11)<br>[Moxifloxacin (n=8), duration [median (IQR)] 7 (6–8.75) days, lopinavir/ritonavir and interferon alfa (n=10), Umifenovir and lopinavir/ritonavir and interferon alfa (n=1), duration of interferon alfa (days), [median (IQR)] 16 (10.5–17.5), duration of antiviral drug (days), [median (IQR)] 9 (8–10)]                                                                                                                                       | Mortality: 0 patients                                                                       |                                                                                              |
| <b>Study:</b> Zhu, 2020<br><b>Condition:</b> COVID-19                                                                                                                                                                                                                                                                                                                                                                                                              |                                                                                             |                                                                                              |
| Arbidol (n=16)<br>[arbidol group was given 0.2g arbidol, three times a day; All patients received conventional therapy, including oxygen inhalation (2L/min for half an hour, three times a day), atomized inhalation of recombinant human interferon- $\alpha$ 2b injection (5 million units, twice a day)]                                                                                                                                                       |                                                                                             | elevated levels of ALT (<125 U/L): 3/16 patients, occurred during 1st week of admission      |

1  
2  
3  
4  
5  
6  
7  
8  
9  
10  
11  
12  
13  
14  
15  
16  
17  
18  
19  
20  
21  
22  
23  
24  
25  
26  
27  
28  
29  
30  
31  
32  
33  
34  
35  
36  
37  
38  
39  
40  
41  
42  
43  
44  
45  
46  
47

| <b>Drug therapy (sample size)</b><br><b>[dose, route of administration, frequency, duration; additional therapies]</b>                                                                                                                                                                                                                                                                                                                                                                                                                                                                                                                                                                                                                                                                                                                                                                                                                                                                                        | <b>Effectiveness outcome:</b><br><b>quantitative results;</b><br><b>‘study conclusions’</b> | <b>Safety outcome:</b><br><b>quantitative results;</b><br><b>duration, clinical response</b> |
|---------------------------------------------------------------------------------------------------------------------------------------------------------------------------------------------------------------------------------------------------------------------------------------------------------------------------------------------------------------------------------------------------------------------------------------------------------------------------------------------------------------------------------------------------------------------------------------------------------------------------------------------------------------------------------------------------------------------------------------------------------------------------------------------------------------------------------------------------------------------------------------------------------------------------------------------------------------------------------------------------------------|---------------------------------------------------------------------------------------------|----------------------------------------------------------------------------------------------|
| Lopinavir/ritonavir (n=34)<br>[Lopinavir/ritonavir group received 400mg/100mg twice a day for a week; All patients received conventional therapy, including oxygen inhalation (2L/min for half an hour, three times a day), atomized inhalation of recombinant human interferon- $\alpha$ 2b injection (5 million units, twice a day)]                                                                                                                                                                                                                                                                                                                                                                                                                                                                                                                                                                                                                                                                        |                                                                                             | elevated levels of ALT (<125 U/L): 3/34, occurred during 1st week of admission               |
| <p><sup>1</sup> includes: Hypoalbuminaemia; Hypokalaemia; Increased blood glucose; Anaemia; Rash; Thrombocytopenia; Increased total bilirubin; Increased blood lipids; Increased white blood cell count; Hyperlipidaemia; Increased blood urea nitrogen; Increased neutrophil; Aspartate aminotransferase increased; Constipation; Nausea; Diarrhoea; Vomiting; Reduced serum sodium; Increased serum potassium</p> <p><sup>2</sup> includes: Respiratory failure or acute respiratory distress syndrome; Cardiopulmonary failure; Pulmonary embolism; Recurrence of COVID-19; Cardiac arrest; Acute coronary syndrome; Tachycardia; Septic shock; Lung abscess; Sepsis; Bronchitis; Thrombocytopenia; Increased D-dimer; Haemorrhage of lower digestive tract; Ileus; Deep vein thrombosis; Acute kidney injury; Diabetic ketoacidosis; Multiple organ dysfunction syndrome</p> <p>§ Multiple analyses of overlapping cohorts of patients</p> <p>Bolded text indicates statistically significant results</p> |                                                                                             |                                                                                              |

## PRISMA ScR checklist

| SECTION                                  | ITEM | PRISMA-ScR CHECKLIST ITEM                                                                                                                                                                                                                                                                                  | REPORTED ON PAGE # |
|------------------------------------------|------|------------------------------------------------------------------------------------------------------------------------------------------------------------------------------------------------------------------------------------------------------------------------------------------------------------|--------------------|
| <b>TITLE</b>                             |      |                                                                                                                                                                                                                                                                                                            |                    |
| <b>Title</b>                             | 1    | Identify the report as a scoping review.                                                                                                                                                                                                                                                                   | 1                  |
| <b>ABSTRACT</b>                          |      |                                                                                                                                                                                                                                                                                                            |                    |
| <b>Structured summary</b>                | 2    | Provide a structured summary that includes (as applicable): background, objectives, eligibility criteria, sources of evidence, charting methods, results, and conclusions that relate to the review questions and objectives.                                                                              | 2                  |
| <b>INTRODUCTION</b>                      |      |                                                                                                                                                                                                                                                                                                            |                    |
| <b>Rationale</b>                         | 3    | Describe the rationale for the review in the context of what is already known. Explain why the review questions/objectives lend themselves to a scoping review approach.                                                                                                                                   | 3                  |
| <b>Objectives</b>                        | 4    | Provide an explicit statement of the questions and objectives being addressed with reference to their key elements (e.g., population or participants, concepts, and context) or other relevant key elements used to conceptualize the review questions and/or objectives.                                  | 3                  |
| <b>METHODS</b>                           |      |                                                                                                                                                                                                                                                                                                            |                    |
| <b>Protocol and registration</b>         | 5    | Indicate whether a review protocol exists; state if and where it can be accessed (e.g., a Web address); and if available, provide registration information, including the registration number.                                                                                                             | 3                  |
| <b>Eligibility criteria</b>              | 6    | Specify characteristics of the sources of evidence used as eligibility criteria (e.g., years considered, language, and publication status), and provide a rationale.                                                                                                                                       | 4-5                |
| <b>Information sources*</b>              | 7    | Describe all information sources in the search (e.g., databases with dates of coverage and contact with authors to identify additional sources), as well as the date the most recent search was executed.                                                                                                  | 4                  |
| <b>Search</b>                            | 8    | Present the full electronic search strategy for at least 1 database, including any limits used, such that it could be repeated.                                                                                                                                                                            | 4, Appendix 2      |
| <b>Selection of sources of evidence†</b> | 9    | State the process for selecting sources of evidence (i.e., screening and eligibility) included in the scoping review.                                                                                                                                                                                      | 5-6                |
| <b>Data charting process‡</b>            | 10   | Describe the methods of charting data from the included sources of evidence (e.g., calibrated forms or forms that have been tested by the team before their use, and whether data charting was done independently or in duplicate) and any processes for obtaining and confirming data from investigators. | 6                  |
| <b>Data items</b>                        | 11   | List and define all variables for which data were sought and any assumptions and simplifications made.                                                                                                                                                                                                     | 6                  |

|                                                                          |    |                                                                                                                                                                                                       |                           |
|--------------------------------------------------------------------------|----|-------------------------------------------------------------------------------------------------------------------------------------------------------------------------------------------------------|---------------------------|
| <b>Critical appraisal of individual sources of evidence</b> <sup>§</sup> | 12 | If done, provide a rationale for conducting a critical appraisal of included sources of evidence; describe the methods used and how this information was used in any data synthesis (if appropriate). | N/A                       |
| <b>Synthesis of results</b>                                              | 13 | Describe the methods of handling and summarizing the data that were charted.                                                                                                                          | 6                         |
| <b>RESULTS</b>                                                           |    |                                                                                                                                                                                                       |                           |
| <b>Selection of sources of evidence</b>                                  | 14 | Give numbers of sources of evidence screened, assessed for eligibility, and included in the review, with reasons for exclusions at each stage, ideally using a flow diagram.                          | 7, Figure 1, Appendix 4   |
| <b>Characteristics of sources of evidence</b>                            | 15 | For each source of evidence, present characteristics for which data were charted and provide the citations.                                                                                           | 8-9, Table 1, Appendix 3  |
| <b>Critical appraisal within sources of evidence</b>                     | 16 | If done, present data on critical appraisal of included sources of evidence (see item 12).                                                                                                            | N/A                       |
| <b>Results of individual sources of evidence</b>                         | 17 | For each included source of evidence, present the relevant data that were charted that relate to the review questions and objectives.                                                                 | 9-14, Table 2, Appendix 5 |
| <b>Synthesis of results</b>                                              | 18 | Summarize and/or present the charting results as they relate to the review questions and objectives.                                                                                                  | 9-14, Table 2             |
| <b>DISCUSSION</b>                                                        |    |                                                                                                                                                                                                       |                           |
| <b>Summary of evidence</b>                                               | 19 | Summarize the main results (including an overview of concepts, themes, and types of evidence available), link to the review questions and objectives, and consider the relevance to key groups.       | 17, Table 2               |
| <b>Limitations</b>                                                       | 20 | Discuss the limitations of the scoping review process.                                                                                                                                                | 17-18                     |
| <b>Conclusions</b>                                                       | 21 | Provide a general interpretation of the results with respect to the review questions and objectives, as well as potential implications and/or next steps.                                             | 17-18                     |
| <b>FUNDING</b>                                                           |    |                                                                                                                                                                                                       |                           |
| <b>Funding</b>                                                           | 22 | Describe sources of funding for the included sources of evidence, as well as sources of funding for the scoping review. Describe the role of the funders of the scoping review.                       | 20                        |

JBI = Joanna Briggs Institute; PRISMA-ScR = Preferred Reporting Items for Systematic reviews and Meta-Analyses extension for Scoping Reviews.

\* Where sources of evidence (see second footnote) are compiled from, such as bibliographic databases, social media platforms, and Web sites.

† A more inclusive/heterogeneous term used to account for the different types of evidence or data sources (e.g., quantitative and/or qualitative research, expert opinion, and policy documents) that may be eligible in a scoping review as opposed to only studies. This is not to be confused with information sources (see first footnote).

‡ The frameworks by Arksey and O'Malley (6) and Levac and colleagues (7) and the JBI guidance (4, 5) refer to the process of data extraction in a scoping review as data charting.

§ The process of systematically examining research evidence to assess its validity, results, and relevance before using it to inform a decision. This term is used for items 12 and 19 instead of "risk of bias" (which is more applicable to systematic reviews of interventions) to include and acknowledge the various sources of evidence that may be used in a scoping review (e.g., quantitative and/or qualitative research, expert opinion, and policy document).

# BMJ Open

## Comparative-effectiveness research of COVID-19 treatment: A rapid scoping review

|                                 |                                                                                                                                                                                                                                                                                                                                                                                                                                                                                                                                                                                                                                                                                                                                                                                                                                                                                                                                                                                                                                                                                                                                                                                                                                                                                                                                                                                                                                                                                                                                                                                                                                                             |
|---------------------------------|-------------------------------------------------------------------------------------------------------------------------------------------------------------------------------------------------------------------------------------------------------------------------------------------------------------------------------------------------------------------------------------------------------------------------------------------------------------------------------------------------------------------------------------------------------------------------------------------------------------------------------------------------------------------------------------------------------------------------------------------------------------------------------------------------------------------------------------------------------------------------------------------------------------------------------------------------------------------------------------------------------------------------------------------------------------------------------------------------------------------------------------------------------------------------------------------------------------------------------------------------------------------------------------------------------------------------------------------------------------------------------------------------------------------------------------------------------------------------------------------------------------------------------------------------------------------------------------------------------------------------------------------------------------|
| Journal:                        | <i>BMJ Open</i>                                                                                                                                                                                                                                                                                                                                                                                                                                                                                                                                                                                                                                                                                                                                                                                                                                                                                                                                                                                                                                                                                                                                                                                                                                                                                                                                                                                                                                                                                                                                                                                                                                             |
| Manuscript ID                   | bmjopen-2020-045115.R1                                                                                                                                                                                                                                                                                                                                                                                                                                                                                                                                                                                                                                                                                                                                                                                                                                                                                                                                                                                                                                                                                                                                                                                                                                                                                                                                                                                                                                                                                                                                                                                                                                      |
| Article Type:                   | Original research                                                                                                                                                                                                                                                                                                                                                                                                                                                                                                                                                                                                                                                                                                                                                                                                                                                                                                                                                                                                                                                                                                                                                                                                                                                                                                                                                                                                                                                                                                                                                                                                                                           |
| Date Submitted by the Author:   | 02-Feb-2022                                                                                                                                                                                                                                                                                                                                                                                                                                                                                                                                                                                                                                                                                                                                                                                                                                                                                                                                                                                                                                                                                                                                                                                                                                                                                                                                                                                                                                                                                                                                                                                                                                                 |
| Complete List of Authors:       | Pham, Ba; St Michael's Hospital Li Ka Shing Knowledge Institute<br>Rios, Patricia; St Michael's Hospital Li Ka Shing Knowledge Institute<br>Radhakrishnan, Amruta; St Michael's Hospital Li Ka Shing Knowledge Institute<br>Darvesh, Nazia; St Michael's Hospital Li Ka Shing Knowledge Institute<br>Antony, Jesmin; St Michael's Hospital Li Ka Shing Knowledge Institute<br>Williams, Chantal; St Michael's Hospital Li Ka Shing Knowledge Institute<br>Ramkissoon, Naveeta; St Michael's Hospital Li Ka Shing Knowledge Institute<br>Cormack, Gordon; University of Waterloo, David R. Cheriton School of Computer Science<br>Grossman, Maura; University of Waterloo, David R. Cheriton School of Computer Science<br>Kampman, Melissa; Health Canada, Epidemiology and Evidence Evaluation for Safety and Effectiveness Section<br>Patel, Milan; Public Health Agency of Canada<br>Yazdi, Fatemeh; St Michael's Hospital Li Ka Shing Knowledge Institute<br>Robson, Reid; St Michael's Hospital Li Ka Shing Knowledge Institute<br>Ghassemi, Marco ; St Michael's Hospital Li Ka Shing Knowledge Institute<br>Macdonald, Erin; St Michael's Hospital Li Ka Shing Knowledge Institute<br>Warren, Rachel; St Michael's Hospital Li Ka Shing Knowledge Institute<br>Muller, Matthew; St Michael's Hospital Li Ka Shing Knowledge Institute; University of Toronto, Medicine<br>Straus, Sharon; St Michael's Hospital Li Ka Shing Knowledge Institute; University of Toronto, Geriatric Medicine<br>Tricco, Andrea; St Michael's Hospital Li Ka Shing Knowledge Institute; University of Toronto Dalla Lana School of Public Health, Epidemiology Division |
| <b>Primary Subject Heading</b>: | Respiratory medicine                                                                                                                                                                                                                                                                                                                                                                                                                                                                                                                                                                                                                                                                                                                                                                                                                                                                                                                                                                                                                                                                                                                                                                                                                                                                                                                                                                                                                                                                                                                                                                                                                                        |
| Secondary Subject Heading:      | Pharmacology and therapeutics                                                                                                                                                                                                                                                                                                                                                                                                                                                                                                                                                                                                                                                                                                                                                                                                                                                                                                                                                                                                                                                                                                                                                                                                                                                                                                                                                                                                                                                                                                                                                                                                                               |
| Keywords:                       | COVID-19, RESPIRATORY MEDICINE (see Thoracic Medicine), Clinical trials < THERAPEUTICS                                                                                                                                                                                                                                                                                                                                                                                                                                                                                                                                                                                                                                                                                                                                                                                                                                                                                                                                                                                                                                                                                                                                                                                                                                                                                                                                                                                                                                                                                                                                                                      |
|                                 |                                                                                                                                                                                                                                                                                                                                                                                                                                                                                                                                                                                                                                                                                                                                                                                                                                                                                                                                                                                                                                                                                                                                                                                                                                                                                                                                                                                                                                                                                                                                                                                                                                                             |

1  
2  
3  
4  
5  
6  
7  
8  
9  
10  
11  
12  
13  
14  
15  
16  
17  
18  
19  
20  
21  
22  
23  
24  
25  
26  
27  
28  
29  
30  
31  
32  
33  
34  
35  
36  
37  
38  
39  
40  
41  
42  
43  
44  
45  
46  
47  
48  
49  
50  
51  
52  
53  
54  
55  
56  
57  
58  
59  
60

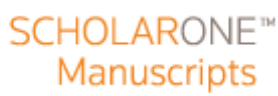



I, the Submitting Author has the right to grant and does grant on behalf of all authors of the Work (as defined in the below author licence), an exclusive licence and/or a non-exclusive licence for contributions from authors who are: i) UK Crown employees; ii) where BMJ has agreed a CC-BY licence shall apply, and/or iii) in accordance with the terms applicable for US Federal Government officers or employees acting as part of their official duties; on a worldwide, perpetual, irrevocable, royalty-free basis to BMJ Publishing Group Ltd ("BMJ") its licensees and where the relevant Journal is co-owned by BMJ to the co-owners of the Journal, to publish the Work in this journal and any other BMJ products and to exploit all rights, as set out in our [licence](#).

The Submitting Author accepts and understands that any supply made under these terms is made by BMJ to the Submitting Author unless you are acting as an employee on behalf of your employer or a postgraduate student of an affiliated institution which is paying any applicable article publishing charge ("APC") for Open Access articles. Where the Submitting Author wishes to make the Work available on an Open Access basis (and intends to pay the relevant APC), the terms of reuse of such Open Access shall be governed by a Creative Commons licence – details of these licences and which [Creative Commons](#) licence will apply to this Work are set out in our licence referred to above.

Other than as permitted in any relevant BMJ Author's Self Archiving Policies, I confirm this Work has not been accepted for publication elsewhere, is not being considered for publication elsewhere and does not duplicate material already published. I confirm all authors consent to publication of this Work and authorise the granting of this licence.



1  
2  
3  
4 **1 Comparative-effectiveness research of COVID-19 treatment: A rapid scoping review**

5  
6 2 Ba' Pham<sup>1</sup> Email: [ba.pham@theta.utoronto.ca](mailto:ba.pham@theta.utoronto.ca)

7  
8 3 Patricia Rios<sup>1</sup> Email: [patricia.rios@unityhealth.to](mailto:patricia.rios@unityhealth.to)

9  
10 4 Amruta Radhakrishnan<sup>1</sup> Email: [amruta.radhakrishnan@unityhealth.to](mailto:amruta.radhakrishnan@unityhealth.to)

11  
12 5 Nazia Darvesh<sup>1</sup> Email: [nazia.darvesh@unityhealth.to](mailto:nazia.darvesh@unityhealth.to)

13  
14 6 Jesmin Antony<sup>1</sup> Email: [jesminantony@gmail.com](mailto:jesminantony@gmail.com)

15  
16 7 Chantal Williams<sup>1</sup> Email: [chantal.williams@uhn.to](mailto:chantal.williams@uhn.to)

17  
18 8 Naveeta Ramkissoon<sup>1</sup> Email: [naveeta.ramkissoon@unityhealth.to](mailto:naveeta.ramkissoon@unityhealth.to)

19  
20 9 Gordon V. Cormack<sup>2</sup> Email: [gvcormac@uwaterloo.ca](mailto:gvcormac@uwaterloo.ca)

21  
22 10 Maura R. Grossman<sup>2</sup> Email: [maura.grossman@uwaterloo.ca](mailto:maura.grossman@uwaterloo.ca)

23  
24 11 Melissa Kampman<sup>3</sup> Email: [melissa.kampman@hc-sc.gc.ca](mailto:melissa.kampman@hc-sc.gc.ca)

25  
26 12 Milan Patel<sup>4</sup> Email: [milan.patel@canada.ca](mailto:milan.patel@canada.ca)

27  
28 13 Fatemeh Yazdi<sup>1</sup> Email: [yazdi@live.ca](mailto:yazdi@live.ca)

29  
30 14 Reid Robson<sup>1</sup> Email: [reidcrobson@gmail.com](mailto:reidcrobson@gmail.com)

31  
32 15 Marco Ghassemi<sup>1</sup> Email: [marco.m.ghassemi@gmail.com](mailto:marco.m.ghassemi@gmail.com)

33  
34 16 Erin Macdonald<sup>1</sup> Email: [emacd02@gmail.com](mailto:emacd02@gmail.com)

35  
36 17 Rachel Warren<sup>1</sup> Email: [Rachel.Warren@unityhealth.to](mailto:Rachel.Warren@unityhealth.to)

37  
38 18 Matthew P. Muller<sup>1,5</sup> Email: [matthew.muller@unityhealth.to](mailto:matthew.muller@unityhealth.to)

39  
40 19 Sharon E. Straus<sup>1,6</sup> Email: [sharon.straus@unityhealth.to](mailto:sharon.straus@unityhealth.to)

41  
42 20 Andrea C. Tricco<sup>1,7\*</sup> Email: [andrea.tricco@unityhealth.to](mailto:andrea.tricco@unityhealth.to)

43  
44 21 <sup>1</sup>Li Ka Shing Knowledge Institute, St. Michael's Hospital, Unity Health Toronto, Toronto,  
45  
46  
47  
48  
49  
50  
51  
52  
53 22 Ontario, Canada

1  
2  
3 23 <sup>2</sup> David R. Cheriton School of Computer Science, University of Waterloo, Waterloo, Ontario,  
4

5  
6 24 Canada

7  
8 25 <sup>3</sup> Epidemiology and Evidence Evaluation for Safety and Effectiveness Section, Health Canada  
9

10 26 <sup>4</sup> Public Health Agency of Canada

11  
12 27 <sup>5</sup> Department of Medicine, University of Toronto, Toronto, Ontario, Canada  
13

14 28 <sup>6</sup> Department of Geriatric Medicine, University of Toronto, Toronto, Ontario, Canada

15 29 <sup>7</sup> Epidemiology Division, Dalla Lana School of Public Health and Institute for Health,  
16  
17  
18

19 30 Management, and Evaluation, University of Toronto, Toronto, Ontario, Canada  
20

21 31 \*Corresponding Author

22 32 Andrea C. Tricco

23  
24 33 Knowledge Translation Program  
25  
26

27 34 Li Ka Shing Knowledge Institute

28  
29 35 209 Victoria Street, 7<sup>th</sup> Floor, East Building, Toronto, ON, M5B 1T8  
30  
31

32 36 St. Michael's Hospital, Unity Health Toronto

33  
34 37 Toronto, Canada

35 38 Email: Andrea.Tricco@unityhealth.to

36  
37 39 Phone: 416-864-6060 ext. 77521  
38  
39

40 40 Word count: 2,921  
41  
42  
43  
44  
45  
46  
47  
48  
49  
50  
51  
52  
53  
54  
55  
56  
57  
58  
59  
60

1  
2  
3  
4 41 **ABSTRACT**

5  
6 42 **Objectives:** The COVID-19 pandemic has stimulated growing research on treatment options.  
7  
8  
9 43 We aim to provide an overview of the characteristics of studies evaluating COVID-19  
10  
11 44 treatment.

12  
13 45 **Design:** Rapid scoping review

14  
15 46 **Data sources:** Medline, Embase and biorxiv/medrxiv from inception to May 15, 2021

16  
17 47 **Setting:** Hospital and community care

18  
19 48 **Participants:** COVID-19 patients of all ages

20  
21 49 **Interventions:** COVID-19 treatment

22  
23 50 **Results:** The literature search identified 630 relevant primary studies of which 190 were  
24  
25  
26  
27 51 randomized controlled trials and 303 relevant evidence syntheses. The studies and evidence  
28  
29 52 syntheses were conducted in 51 and 41 countries, respectively.

30  
31  
32 53 Most studies enrolled patients admitted to acute care hospitals (84%), included on average  
33  
34 54 172 participants, with an average age of 60 years, study duration of 28 days, number of effect  
35  
36 55 outcomes of four and number of harm outcomes of one. The most common primary outcome  
37  
38 56 was death (33%).

39  
40  
41 57 The included studies evaluated 215 treatment options. The most common treatments were  
42  
43 58 tocilizumab (11%), hydroxychloroquine (9%), and convalescent plasma (7%). The most  
44  
45 59 common therapeutic categories were non-steroidal immunosuppressants (18%), steroids  
46  
47  
48 60 (15%), and antivirals (14%). The most common therapeutic categories involving multiple  
49  
50 61 drugs were antimalarials/antibiotics (16%), steroids/non-steroidal immunosuppressants (9%),  
51  
52 62 and antimalarials/antivirals/antivirals (7%). The most common treatments evaluated in  
53  
54 63 systematic reviews were steroids (11%), hydroxychloroquine (11%), and remdesivir (7%).

55  
56  
57 64 The evaluated treatment was in favour 50% and 35% of the evaluations, according to the  
58  
59 65 conclusion of the authors of primary studies and evidence syntheses, respectively.  
60

1  
2  
3  
4 66 **Conclusions:** This scoping review characterized a growing body of comparative-  
5  
6 67 effectiveness primary studies and evidence syntheses. The results suggest future studies  
7  
8 68 should focus on children, elderly  $\geq 65$  years of age, patients with mild symptoms, outpatient  
9  
10 69 treatment, multi-mechanism therapies, harms and active comparators. The results also  
11  
12 70 suggest that future living evidence synthesis and network meta-analysis would provide  
13  
14 71 additional information for decision-makers on managing COVID-19.

15  
16  
17 72 Keywords: COVID-19; RESPIRATORY MEDICINE; Clinical trials<THERAPEUTICS,  
18  
19 73 scoping review, knowledge synthesis, evidence synthesis  
20  
21  
22  
23  
24  
25  
26  
27  
28  
29  
30  
31  
32  
33  
34  
35  
36  
37  
38  
39  
40  
41  
42  
43  
44  
45  
46  
47  
48  
49  
50  
51  
52  
53  
54  
55  
56  
57  
58  
59  
60

1  
2  
3 74 **Strengths and limitations of this study**  
4

- 5 75 • Broad literature search and study selection yielded 933 study reports, including 630  
6  
7 relevant studies (190 randomized controlled trials) and 303 evidence syntheses.  
8 76  
9  
10 77 • Detailed charting of study populations, interventions and outcomes of included  
11  
12 studies and reviews were conducted to analyze characteristics and trends in the  
13 78  
14 included literature and to elucidate lessons for future research.  
15 79  
16  
17 80 • Practical implications for future research with respect to study design, populations,  
18  
19 interventions, comparators, outcomes and methodological approaches were identified.  
20 81  
21  
22 82 • Semi-automation approach to study selection, allowing for a very broad literature  
23  
24 search and screening approximately 290,000 titles/abstracts in about 40 person-hours  
25 83  
26 over 2.3 weeks.  
27 84  
28  
29 85 • This is a scoping review and as such, we did not assess the risk of bias of the included  
30  
31 studies and evidence syntheses.  
32 86  
33  
34  
35  
36  
37  
38  
39  
40  
41  
42  
43  
44  
45  
46  
47  
48  
49  
50  
51  
52  
53  
54  
55  
56  
57  
58  
59  
60

## 87 INTRODUCTION

88 The current global pandemic of Coronavirus Disease 2019 (COVID-19) has resulted in a high  
89 burden of disease and mortality worldwide(1, 2). The lack of effective treatments for  
90 COVID-19 has resulted in the almost constant production of studies and evidence syntheses  
91 evaluating potential treatment options, as illustrated by thousands of study protocols in  
92 clinical trial registries and hundreds of review protocols in systematic review registries(3, 4).  
93 Attempts to synthesize this evidence thus far have resulted in various scoping reviews  
94 focusing on single drugs or isolated drug classes(5-9). Better understanding of the  
95 characteristics of study populations, treatments and outcomes of this research is a prerequisite  
96 to the design and conduct of future comparative-effectiveness research.  
97 The objective of this rapid scoping review was to provide an overview of the characteristics  
98 of studies examining COVID-19 treatment.

## 99 METHODS

100 The conduct of the rapid scoping review was guided by the JBI (formally Joanna Briggs  
101 Institute) Guide for scoping reviews, alongside the World Health Organization (WHO) Guide  
102 to rapid reviews(10, 11). An integrated knowledge translation approach was used to engage  
103 with the knowledge users from Health Canada (MK) and Public Health Agency of Canada  
104 (MP) throughout the conduct of the rapid scoping review, including during: research question  
105 development, literature search, study inclusion, interpretation of results, and draft report. The  
106 protocol for the review was registered using the Open Science Framework  
107 (<https://osf.io/ypz7x>). The discussion section includes minor amendments that occurred to the  
108 conduct of the review from the original protocol. Reporting of results was guided using the  
109 Preferred Reporting Items for Systematic Reviews and Meta-Analyses extension to Scoping  
110 Reviews (PRISMA-ScR) Statement(12). Our research question was “What evidence exists on

1  
2  
3 111 the treatments for COVID-19 in primary studies and reviews”, which is appropriate for the  
4  
5 112 scoping review methodology(13).  
6  
7  
8

### 9 113 **Patient and Public Involvement**

10  
11 114 Since this work was carried out as part of a rapid response to the COVID-19 pandemic  
12  
13 115 project, timelines did not allow for participation of any patients or members of the public in  
14  
15 116 this scoping review.  
16  
17

### 18 19 117 **Literature search**

20  
21 118 Comprehensive literature searches and citation screening were used in combination to gather  
22  
23 119 relevant evidence from MEDLINE, EMBASE and pre-print servers (biorxiv/medrxiv)(14).  
24  
25

26 120 The literature was initially searched from inception to May 21, 2020 and subsequently  
27  
28 121 updated to May 15, 2021. Titles/abstracts were identified for screening using the Continuous  
29  
30 122 Active Learning<sup>®</sup> (CAL<sup>®</sup>) tool, which uses supervised machine learning (see Appendix 1 for  
31  
32 123 the description and performance of the tool)(14). For archives that could be retrieved in their  
33  
34 124 entirety (e.g., MEDLINE, pre-print servers), the CAL<sup>®</sup> tool applied broad relevant search  
35  
36 125 terms (Appendix 1). This search was supplemented by a literature search conducted by an  
37  
38 126 experienced librarian in EMBASE (Appendix 2). The literature search was not restrict by  
39  
40 127 language or publication status.  
41  
42  
43  
44

### 45 128 **Eligibility criteria**

46  
47 129 The eligibility criteria followed the PICOS framework and consisted of:

- 48  
49  
50 130 • Population: Individuals of any age who were clinically and/or laboratory diagnosed with  
51  
52 131 COVID-19.  
53  
54 132 • Intervention: Any compounds under investigation in human clinical trials as potential  
55  
56 133 COVID-19 therapies (Appendix 3). Chinese medicine and complementary and alternative  
57  
58 134 medicine – either alone or in combination with these medications – were excluded.  
59  
60

- 1  
2  
3 135 • Comparator: Any of the interventions listed above, no intervention or placebo.  
4  
5  
6 136 • Outcomes: Any reported outcome.  
7  
8 137 • Study designs: Primary studies of any design with a comparator group. Evidence  
9  
10 138 syntheses of such studies were included, including systematic reviews, scoping reviews,  
11  
12 139 rapid reviews, meta-analysis and overviews of reviews.  
13  
14  
15

## 16 140 **Study selection**

17  
18 141 A streamlined approach to study selection was used for the rapid scoping review. In  
19  
20 142 combination with manual screening by reviewers, the CAL<sup>®</sup> tool was used to identify and  
21  
22 143 rank the titles and abstracts most likely to meet the inclusion criteria. This process continued  
23  
24 144 iteratively until none of the identified articles met the inclusion criteria. For manual  
25  
26 145 screening, a screening form based on the eligibility criteria was prepared for reviewers to aid  
27  
28 146 in making consistent judgements on article relevance. A pilot-test was conducted using a  
29  
30 147 random sample of 10 titles/abstracts until reviewers reached at least 75% agreement.  
31  
32 148 Subsequently, screening was completed by single reviewers.  
33  
34  
35  
36

## 37 149 **Data charting and coding**

38  
39 150 A charting form was developed and calibrated amongst the entire review team using two  
40  
41 151 randomly selected full-text articles to ensure a standard approach to data collection.  
42  
43 152 Following successful completion of the pilot-test, included studies were charted by single  
44  
45 153 reviewers and verified by a second reviewer to ensure accuracy. Methodological quality or  
46  
47 154 risk of bias appraisal of included studies was not conducted since this is scoping review(10).  
48  
49 155 The items collected included study characteristics (e.g., study duration, study design, country  
50  
51 156 of conduct), patient characteristics (e.g., type of diagnosis, mean age), intervention and  
52  
53 157 comparator details (e.g., type of intervention, dose, frequency, duration) and outcome  
54  
55 158 measures details (e.g., mortality, viral clearance, and hospital admission).  
56  
57  
58  
59  
60



1  
2  
3 159 Pharmacological agents were grouped by their therapeutic category(15). Study primary  
4  
5 160 outcomes were grouped together to reflect the clinical, virology, respiratory, inflammatory,  
6  
7 161 cardiology and olfactory status and measures of COVID-19(16, 17). The numbers of effect  
8  
9 162 and harm measures were derived by counting the outcomes from the description of study  
10  
11 163 outcomes. Authors' conclusions were coded into the following categories: favor treatment,  
12  
13 164 favor control, indeterminate and other(18). Pairs of reviewers conducted the data coding  
14  
15 165 independently, with discrepancies reviewed and resolved through discussion by a pair of  
16  
17 166 reviewers.  
18  
19  
20  
21

## 22 167 **Synthesis**

23  
24 168 The charted and coded data were summarized descriptively for all patient population,  
25  
26 169 interventions, comparators and outcomes. The data were stratified by study design  
27  
28 170 (randomized controlled trials versus non-RCT) and review type (review conducted according  
29  
30 171 to a review protocol or otherwise).  
31  
32  
33

## 34 172 **Data repository**

35  
36 173 All material related to this review, including EndNote databases, extracted data in MS Excel,  
37  
38 174 coding categories and analysis procedures written in the statistical software R are available at  
39  
40 175 [https://knowledgetranslation.net/comparative-effectiveness-research-of-covid-19-treatment-a-](https://knowledgetranslation.net/comparative-effectiveness-research-of-covid-19-treatment-a-rapid-scoping-review-data-repository/)  
41  
42 176 [rapid-scoping-review-data-repository/](https://knowledgetranslation.net/comparative-effectiveness-research-of-covid-19-treatment-a-rapid-scoping-review-data-repository/).  
43  
44  
45  
46

## 47 177 **RESULTS**

### 48 178 **Literature Search**

49  
50  
51 179 Figure 1 displays the literature search results. The semi-automation process with CAL<sup>®</sup> and  
52  
53 180 human reviewers allowed for the screening of approximately 290,000 titles/abstracts in about  
54  
55 181 40 person-hours over 2.3 weeks. Specifically, CAL<sup>®</sup> identified 289,844 Covid-19 records and  
56  
57 182 4,183 potentially relevant titles/abstracts. Title/abstract screening by reviewers resulted in  
58  
59  
60

1  
2  
3 183 1,542 potentially relevant reports. Report screening by reviewers resulted in 933 relevant  
4  
5 184 reports, including 630 studies and 303 knowledge syntheses. The list of included primary  
6  
7 185 studies and knowledge syntheses is in Appendix 4 and 5, respectively.  
8  
9

## 10 11 186 **Characteristics of included studies**

12  
13 187 Figure 2 displays the timing when the studies were available online; on average 48 primary  
14  
15 188 studies per month were published from July 2020 to April 2021. Table 1 displays the  
16  
17 189 characteristics of the 630 included studies of varying design, including randomized controlled  
18  
19 190 trials (190 studies [30%]), retrospective cohort studies (314 [50%]) and prospective cohort  
20  
21 191 studies (71 [11%]), amongst others. The median study duration was 28 days and the median  
22  
23 192 sample size was 172 participants. Public sources provided funding for about a third of the  
24  
25 193 studies; RCTs were funded often by private funding sources (27% relative to 3% for non-  
26  
27 194 RCT). The primary studies were conducted in 51 countries, including the United States  
28  
29 195 (26%), China (17%), Italy (8%), France (7%), Spain (7%), India (4%), Iran (3%), United  
30  
31 196 Kingdom (3%) and Brazil (3%), among others (Table A1, Appendix 6).  
32  
33

34  
35 197 Most studies were conducted with participants admitted to acute care hospital (84%).  
36  
37 198 Participants were on average 60 years of age, including 61% male, and mostly with  
38  
39 199 confirmed COVID-19 via PCR test (Table 1). About a third of the included studies enrolled  
40  
41 200 participants with severe or critical COVID-19 conditions. Few studies (0.3%) enrolled  
42  
43 201 children (e.g., <16 years of age, 0.3%) or the elderly (e.g., ≥65 years of age, 2%). Figure A1  
44  
45 202 displays the cloud of words often used to describe the participants (Appendix 6). Typical  
46  
47 203 words used were COVID-19, COVID-19 patients, hospitalized, severe, pneumonia, ICU,  
48  
49 204 outpatient, respiratory distress, invasive mechanical ventilation, critically ill and  
50  
51 205 supplemental oxygen, among others.  
52  
53

54  
55 206 The median number of effect outcomes was four, and the corresponding number of harm  
56  
57 207 outcomes was one (Table 1). Common primary outcomes included death/survival (33% of the  
58  
59

1  
2  
3 208 included studies), clinical status/measures (20%), virology status/measures (10%), respiratory  
4  
5 209 status/measures (9%), safety/adverse events excluding death (7%) and composite outcomes  
6  
7 210 involving death (7%, e.g., intubation and death, or intensive care admission and death),  
8  
9 211 among others.

12 212 The included studies evaluated 828 treatment arms (712 single-drug and 116 multiple-drug  
13  
14 213 treatment arms) against 630 control arms, of which 137 (22%) control arms involved active  
15  
16 214 comparators (Table 2). The treatment arms consisted of 215 unique treatment options (Table  
17  
18 215 A2, Appendix 6). The most common treatments were tocilizumab (11%),  
19  
20 216 hydroxychloroquine (9%), convalescent plasma (7%), steroid (4%), lopinavir combined with  
21  
22 217 ritonavir (4%), methylprednisolone (3%), remdesivir (3%), enoxaparin (2%),  
23  
24 218 hydroxychloroquine combine with azithromycin (2%), and anakinra (2%), among others.

28 219 Table 2 also displays the common therapeutic categories of the evaluated treatment. The most  
29  
30 220 common therapeutic categories were non-steroidal immunosuppressant (18%), steroid (15%),  
31  
32 221 antiviral (14%), antimalarial (12%), anticoagulant (5%), convalescent plasma (8%), antibiotic  
33  
34 222 (4%), anti-inflammatory (3%), interferon therapy (2%), anti-parasitic (2%) and  
35  
36 223 immunomodulatory (2%), among others (details in Table A3, Appendix 6). Common  
37  
38 224 therapeutic categories involving multiple drugs were the combination of  
39  
40 225 antimalarial/antibiotic (16%), steroid/non-steroidal immunosuppressant (9%),  
41  
42 226 antimalarial/antiviral/antiviral (7%), 2-antivirals (4%) and antiviral/interferon (4%), among  
43  
44 227 others (Table A4, Appendix 6).

## 50 228 **Characteristics of included knowledge syntheses**

52 229 Figure 2 displays the timing when the knowledge syntheses were available online, on average  
53  
54 230 22 reviews appeared each month from May 2020 to April 2021. Table 3 displays  
55  
56 231 characteristics of the 303 included knowledge syntheses, including 89 (29%) knowledge  
57  
58 232 syntheses and 214 (71%) knowledge syntheses conducted with and without a review  
59  
60

233 protocol, respectively. Commonly conducted knowledge syntheses included systematic  
234 review with meta-analysis (63%), systematic review (24%), meta-analysis (4%, none  
235 mentioned the use of a review protocol), scoping review (3%) and rapid review (3%), among  
236 others. Most reviews (83%) included RCT and non-RCT studies. The median number of data  
237 sources was five and the median number of included studies was 14. The evidence syntheses  
238 were conducted in 41 countries, including the United States (19%), China (14%), India  
239 (11%), Iran (6%) and the United Kingdom (6%), among others (Table A5, Appendix 6).  
240 The evidence syntheses evaluated 540 treatment arms against 303 control arms (see Table 4).  
241 The treatment arms consisted of 140 unique treatment options. Table 5 displays common  
242 treatment options, including steroid (11%), hydroxychloroquine (11%), remdesivir (7%),  
243 tocilizumab (7%), convalescent plasma (6%), and lopinavir/ritonavir (4%), chloroquine (4%)  
244 and antiviral (4%), among others (Table A6, Appendix 6).

#### 245 **Treatment evaluation according to authors' conclusion**

246 Table 5 displays the results of the treatment evaluation according to authors' conclusion.  
247 Among the included studies and knowledge syntheses, the conclusion was in favour of  
248 treatment 50% and 35% of the evaluated treatment arms, respectively.

#### 249 **DISCUSSION**

250 We completed a rapid scoping review for Health Canada and Public Health Agency of  
251 Canada to identify pharmacologic treatments for COVID-19. A comprehensive search of  
252 electronic databases, trial registries and other grey literature sources from inception to May  
253 2020 identified 9 controlled trials and 19 cohort studies with approximately 8,000  
254 participants. Updated to May 15, 2021, the search of electronic databases identified 933  
255 relevant reports, including 630 studies with approximately 15.4 million participants, and 303  
256 knowledge syntheses.

1  
2  
3 257 With respect to study population, existing studies put much emphasis on adult patients  
4  
5 258 admitted to acute care hospitals. Future studies need to focus on children, older adults aged  
6  
7 259  $\geq 65$  years and patients with mild symptoms in community settings. Future study populations  
8  
9  
10 260 will need to reflect a broader range of age groups as the current pandemic evolves to affect  
11  
12 261 younger age groups(19, 20).

13  
14 262 With respect to treatment, many studies and reviews evaluated antimalarial agents. Existing  
15  
16 263 studies emphasised preventing and treating cytokine surge with steroids and non-steroidal  
17  
18 264 immunosuppressants, including interleukin-6 inhibitors (e.g., tocilizumab, sarilumab),  
19  
20 265 interleukin-1 antagonist (e.g., anakinra), anti-IL-1 $\beta$  monoclonal antibody (e.g., canakinumab),  
21  
22 266 TNF-alpha inhibitor (e.g., adalimumab) and Janus kinase inhibitors (e.g., baricitinib,  
23  
24 267 ruxolitinib). Future studies may need to explore treatment for patients not responding to these  
25  
26 268 agents, such as immunomodulators (e.g., thymosin- $\alpha 1$ ). Existing studies put much emphasis  
27  
28 269 on monotherapy; future studies need to evaluate combination therapy that addresses the  
29  
30 270 multiple aspects of COVID-19, such as virology, respiratory, inflammatory and cardiology.  
31  
32 271 Future studies may also need to explore outpatient treatment for patients with mild  
33  
34 272 symptoms, and treatment options not frequently evaluated in existing studies, such as  
35  
36 273 therapeutic anticoagulants.

37  
38 274 With respect to comparators, most existing randomized controlled trials used placebo  
39  
40 275 comparators while most observational studies used standard of care as comparator; future  
41  
42 276 studies may consider active treatment as comparators, especially when evaluating treatments  
43  
44 277 aiming to produce incremental improvement against effective treatments. Methodological  
45  
46 278 issues related to the selection and delineation of comparators in studies evaluating  
47  
48 279 combination therapies deserve attention. For example, a study evaluated multi-mechanism  
49  
50 280 approach with medications targeting early immunomodulation, anticoagulation, and viral  
51  
52 281 suppression to prevent catastrophic cytokine release syndrome encountered large variation in  
53  
54  
55  
56  
57  
58  
59  
60

1  
2  
3 282 clinical characteristics of study participants and standard-of-care comparators in the five  
4  
5 283 participant hospitals in two countries, including differences in disease severity and different  
6  
7 284 doses of colchicine and types of steroids used across comparative groups(17).  
8  
9  
10 285 With respect to outcomes, about a third of the included studies used mortality as the primary  
11  
12 286 outcome. Tracking this outcome may require sufficiently long study duration, perhaps longer  
13  
14 287 than the median duration of less than a month observed among existing studies, especially in  
15  
16 288 patients with prolonged respiratory problems, suggesting longer follow-up duration for future  
17  
18 289 studies. Of note, few existing studies used composite endpoints involving death, including  
19  
20 290 endpoints such as intubation and intensive care admission. This use seems to be particularly  
21  
22 291 suitable to capture the respiratory, immunology and cardiovascular aspects of COVID-19, as  
23  
24 292 well as mortality. Few existing studies focused on harms due to treatment and among those  
25  
26 293 that evaluated benefits and harms, the median number of reported harms was one; future  
27  
28 294 studies need to put more emphasis on harm evaluation. Existing RCTs put much emphasis on  
29  
30 295 the use of clinical status/measures as primary outcome measures. Future trials may consider  
31  
32 296 other primary outcomes that are relevant to patients, such as pneumonia, acute respiratory  
33  
34 297 distress syndrome, multi-organ failure, and septic shock, among others.  
35  
36  
37 298 With respect to study design, our results showed a breakdown of 30% and 70% for RCTs and  
38  
39 299 observational studies, respectively. Future trials are needed for evaluating combination  
40  
41 300 therapies. Observational studies will remain pertinent in the evaluation of combination  
42  
43 301 therapies, especially when rich data becomes available with their use in practice. Our review  
44  
45 302 excluded qualitative studies, but we wish to emphasize the importance of these studies in  
46  
47 303 elucidating the experience of COVID-19 patients.  
48  
49  
50 304 With respect to evidence synthesis, we identified a small number of meta-analyses conducted  
51  
52 305 without the associated systematic review and review protocol (n=13). This practice needs to  
53  
54 306 be scrutinized because of the associated high risk of bias in the results, which could be  
55  
56  
57  
58  
59  
60

1  
2  
3 307 wrong, but appeared to be convincingly precise(21). Existing knowledge syntheses mostly  
4  
5 308 evaluated monotherapy; future evidence syntheses will need to include data from the  
6  
7 309 evaluation of combination therapy. The number of existing network meta-analyses was low  
8  
9  
10 310 (n=4); future network meta-analyses are needed to identify effective treatment given a  
11  
12 311 plethora of treatment options, as well as to identify effective component treatment options  
13  
14 312 addressing multiple aspects of COVID-19(22). Given the growing literature, there is a  
15  
16 313 definitive need for living knowledge synthesis, in which the synthesis is updated regularly as  
17  
18 314 new studies become available(23). The results suggest that monthly updates may become  
19  
20 315 necessary.

21  
22  
23 316 With respect to the growing literature, the use of automation tools like CAL<sup>®</sup> for study  
24  
25 317 selection will become essential to ensure a highly sensitive yield of relevant studies,  
26  
27 318 responsive timelines for decision-making and reduced workload for reviewers. In this scoping  
28  
29 319 review, we used a continuous active learning approach that integrates machine learning with  
30  
31 320 feedback instructions from reviewers. This approach allowed the screening of approximately  
32  
33 321 290,000 titles/abstracts in about 40 person-hours over 2.3 weeks. We believe this approach is  
34  
35 322 indispensable for future reviews involving large body of literature. This approach called for  
36  
37 323 slight changes in our review conduct and reporting, of note the reported number of the  
38  
39 324 titles/abstracts excluded by the automation tool in the flowchart (see Figure 1).

40  
41 325 There are several limitations of this review. This is a scoping review, and as such, we did not  
42  
43 326 assess the risk of bias in the included studies and reviews. Initially, the review protocol called  
44  
45 327 for a borrowing strength of evidence approach, including studies evaluating treatment for  
46  
47 328 SARS and MERS. The initial literature search in May 2020 included electronic databases,  
48  
49 329 trial registries, Cochrane Library and other grey literature sources. Given the growing  
50  
51 330 literature on COVID-19 by May 2021, the current review was focused only on COVID-19  
52  
53 331 treatment, with relevant studies identified from MEDLINE, EMBASE and pre-print servers.  
54  
55  
56  
57  
58  
59  
60

1  
2  
3 332 In this review, the evaluated treatment options appeared to attain a reasonable chance of  
4  
5 333 being more effective than their comparators, approximately 30% and 50% according to the  
6  
7 334 authors' conclusions from the included studies and reviews, respectively. However, we did  
8  
9 335 not extract outcome data and combined them to verify the authors' conclusions. To provide a  
10  
11 336 broad overview of the comparative effectiveness research on Covid-19 treatment, we  
12  
13 337 included reports from preprint servers, but these reports had not gone through peer review.  
14  
15 338 Despite these limitations, the methods used in this review were carefully selected to address  
16  
17 339 the needs of our knowledge users from Health Canada and Public Health Agency of Canada.  
18  
19 340 In addition, we made the material from this scoping review available in an online data  
20  
21 341 repository as the data may be useful for conducting systematic reviews of specific therapies  
22  
23 342 or for updating the current review(24).  
24  
25  
26  
27  
28

## 29 343 **CONCLUSIONS**

30  
31 344 This scoping review characterized a growing body of comparative-effectiveness studies and  
32  
33 345 evidence syntheses evaluating hundreds of monotherapy and combination therapy options  
34  
35 346 addressing the multiple sequelae of COVID-19. The results suggest future studies in children,  
36  
37 347 elderly (e.g.,  $\geq 65$  years of age) and patients with mild symptoms, with additional data on  
38  
39 348 outpatient treatment, multi-mechanism therapy, harms and active comparators. The results  
40  
41 349 also suggest that future living evidence synthesis and network meta-analysis would provide  
42  
43 350 additional information for decision-makers on managing COVID-19.  
44  
45  
46  
47  
48  
49  
50  
51  
52  
53  
54  
55  
56  
57  
58  
59  
60



1  
2  
3 351 **DECLARATIONS**  
4

5  
6 352 **Ethics approval and consent to participate**  
7

8 353 Not applicable. This research is exempt from ethics approval because the work is carried out  
9  
10 354 on published documents.

11  
12  
13 355 **Consent for publication**  
14

15 356 Not applicable  
16

17  
18 357 **Availability of data and materials**  
19

20 358 Data sharing is not applicable to this article as no datasets were generated or analysed during  
21  
22 359 the current study.

23  
24 360 **Competing interests**  
25

26  
27 361 The authors have no competing interests to declare.  
28

29 362 **Funding**  
30

31 363 This work was supported through the Drug Safety and Effectiveness Network funded by the  
32  
33 364 Canadian Institutes of Health Research [DMC-166263], the funders had no involvement in  
34  
35 365 the design, conduct, or publication of this study. SES is funded by a Tier 1 Canada Research  
36  
37 366 Chair in Knowledge Translation [17-0245-SUB] and the Mary Trimmer Chair in Geriatric  
38  
39 367 Medicine (award number is not applicable); ACT is funded by a Tier 2 Canada Research  
40  
41 368 Chair in Knowledge Synthesis [17-0126-AWA].  
42  
43  
44

45 369 **Open Access**  
46

47  
48 370 This is an Open Access article distributed in accordance with the Creative Commons  
49  
50 371 Attribution Non Commercial (CC BY-NC 4.0) license, which permits others to distribute,  
51  
52 372 remix, adapt, build upon this work non-commercially, and license their derivative works on  
53  
54 373 different terms, provided the original work is properly cited and the use is non-commercial.  
55  
56 374 See: <http://creativecommons.org/licenses/by-nc/4.0/>  
57  
58

59 375 **Authors' contributions**  
60

1  
2  
3 376 PR and BP analyzed the data, interpreted the results and drafted the original and revised  
4  
5 377 manuscript, respectively. ACT and SES conceived and designed the study, helped obtain  
6  
7 378 funding, interpreted the results and helped write sections of the manuscript. GVC and MRG  
8  
9 379 provided methodological and technical support and edited the manuscript. AR, ND, JA and  
10  
11 380 FY coordinated the review, screened citations and full-text articles, abstracted data, resolved  
12  
13 381 discrepancies and edited the manuscript. MK, MP and MM helped conceive the study,  
14  
15 382 provided methodological support and content expertise and edited the manuscript. RR and  
16  
17 383 MG provided methodological support, screened citations and full-text articles and assisted  
18  
19 384 with drafting the manuscript. CW, NR, EM and RW screened citations and full-text articles,  
20  
21 385 abstracted data and assisted with data analysis. All authors read and approved the final  
22  
23 386 manuscript.  
24  
25  
26  
27

### 28 387 **Acknowledgements**

29  
30 388 The authors would like to thank Jesse McGowan for her assistance in developing literature  
31  
32 389 searches, Alissa Epworth for her assistance executing searches and retrieving articles, and  
33  
34 390 Krystle Amog and Navjot Mann for their assistance in formatting this manuscript.  
35  
36  
37

### 38 391 **Additional File**

39  
40 392 **File Format:** Microsoft Word (.docx)

41  
42 393 **Title of Data:** Additional File 1 (Appendices 1-6)

43  
44 394 **Description of Data:** The appendices include the following additional information:

45  
46 395 Appendix 1 – The Continuous Active Learning (CAL<sup>®</sup>) tool

47  
48 396 Appendix 2 – EMBASE search strategy

49  
50 397 Appendix 3 – List of drugs from Health Canada and Public Health Agency of Canada

51  
52 398 Appendix 4 – List of included primary studies

53  
54 399 Appendix 5 – List of included knowledge syntheses

55  
56 400 Appendix 6 – Additional details for the Results section  
57  
58  
59  
60

1  
2  
3  
4  
5  
6  
7  
8  
9  
10  
11  
12  
13  
14  
15  
16  
17  
18  
19  
20  
21  
22  
23  
24  
25  
26  
27  
28  
29  
30  
31  
32  
33  
34  
35  
36  
37  
38  
39  
40  
41  
42  
43  
44  
45  
46  
47  
48  
49  
50  
51  
52  
53  
54  
55  
56  
57  
58  
59  
60

401 **FIGURE LEGEND**

402 Figure 1. Flow diagram of included studies

403 Study Flow Diagram

404 Figure 2. Timing of available online of included studies\*

405 Online timing chart of included studies

For peer review only

## TABLES

Table 1. Study, participant and outcome characteristics

| Study characteristics              | Total (n=630) | RCT (n=190)   | Non-RCT (n=440) |
|------------------------------------|---------------|---------------|-----------------|
| <b>Study design</b>                |               |               |                 |
| <b>RCT</b>                         | 190 (30%)     | 190           |                 |
| <b>Retrospective cohort</b>        | 314 (50%)     |               | 314 (71%)       |
| <b>Prospective cohort</b>          | 71 (11%)      |               | 71 (16%)        |
| <b>Case-control</b>                | 28 (4%)       |               | 28 (6%)         |
| <b>Controlled clinical trial</b>   | 23 (4%)       |               | 23 (5%)         |
| <b>Controlled before-after</b>     | 4 (1%)        |               | 4 (1%)          |
| <b>Study setting</b>               |               |               |                 |
| Acute care hospital                | 528 (84%)     | 147 (77%)     | 381 (87%)       |
| Intensive care unit                | 44 (7%)       | 4 (2%)        | 40 (9%)         |
| Community                          | 42 (7%)       | 34 (18%)      | 8 (2%)          |
| Community and hospital             | 7 (1%)        | 3 (2%)        | 4 (1%)          |
| Nursing home                       | 3 (0%)        | 0 (0%)        | 3 (1%)          |
| Not reported                       | 6 (1%)        | 2 (1%)        | 4 (1%)          |
| <b>Country</b>                     |               |               |                 |
| United States                      | 166 (26%)     | 38 (20%)      | 128 (29%)       |
| China                              | 109 (17%)     | 27 (14%)      | 82 (19%)        |
| Italy                              | 48 (8%)       | 2 (1%)        | 46 (10%)        |
| France                             | 41 (7%)       | 5 (3%)        | 36 (8%)         |
| Spain                              | 41 (7%)       | 3 (2%)        | 38 (9%)         |
| India                              | 24 (4%)       | 16 (8%)       | 8 (2%)          |
| Iran                               | 21 (3%)       | 15 (8%)       | 6 (1%)          |
| United Kingdom                     | 21 (3%)       | 19 (10%)      | 2 (0%)          |
| Brazil                             | 17 (3%)       | 13 (7%)       | 4 (1%)          |
| Mexico                             | 12 (2%)       | 6 (3%)        | 6 (1%)          |
| Turkey                             | 12 (2%)       | 1 (1%)        | 11 (3%)         |
| <b>Study duration</b>              |               |               |                 |
| Median duration in days (IQR)      | 28 (14, 30)   | 21.5 (14, 28) | 28 (20, 35)     |
| <b>Sample size</b>                 |               |               |                 |
| Median # participants (IQR)        | 172 (77, 507) | 120 (60, 393) | 199 (86, 612)   |
| <b>Study sponsor</b>               |               |               |                 |
| Public                             | 211 (33%)     | 78 (41%)      | 133 (30%)       |
| No funding                         | 171 (27%)     | 22 (12%)      | 149 (34%)       |
| Private                            | 63 (10%)      | 51 (27%)      | 12 (3%)         |
| Public & private                   | 18 (3%)       | 13 (7%)       | 5 (1%)          |
| Not reported                       | 167 (27%)     | 26 (14%)      | 141 (32%)       |
| <b>Participant characteristics</b> |               |               |                 |
| <b>Average age (years)</b>         |               |               |                 |

| <b>Study characteristics</b>                           | <b>Total (n=630)</b> | <b>RCT (n=190)</b> | <b>Non-RCT (n=440)</b> |
|--------------------------------------------------------|----------------------|--------------------|------------------------|
| Median (range)                                         | 60 (6, 88)           | 56 (27, 77)        | 62 (6, 88)             |
| <b>Average percent of male participants</b>            |                      |                    |                        |
| Median (IQR)                                           | 61 (53, 69)          | 59 (50, 66)        | 62 (54, 70)            |
| <b>Diagnosis</b>                                       |                      |                    |                        |
| Polymerase chain reaction (PCR) test                   | 450 (71%)            | 149 (78%)          | 301 (68%)              |
| PCR and other*                                         | 111 (18%)            | 33 (18%)           | 78 (18%)               |
| Not specified                                          | 69 (11%)             | 8 (4%)             | 61 (14%)               |
| <b>Case severity<sup>†</sup></b>                       |                      |                    |                        |
| Severe                                                 | 166 (26%)            | 39 (21%)           | 127 (29%)              |
| Mild or moderate                                       | 47 (7%)              | 24 (13%)           | 23 (5%)                |
| Moderate or severe                                     | 35 (6%)              | 18 (9%)            | 17 (4%)                |
| Severe or critical                                     | 32 (5%)              | 7 (4%)             | 25 (6%)                |
| Moderate                                               | 25 (4%)              | 15 (8%)            | 10 (2%)                |
| Mild                                                   | 22 (3%)              | 15 (8%)            | 7 (2%)                 |
| Mild, moderate or severe                               | 14 (2%)              | 6 (3%)             | 8 (2%)                 |
| Mild, moderate, severe or critical                     | 8 (1%)               | 2 (1%)             | 6 (1%)                 |
| Moderate, severe or critical                           | 4 (1%)               | 1 (1%)             | 3 (1%)                 |
| <b>Special age group**</b>                             |                      |                    |                        |
| <b>Elderly (e.g., ≥65 years of age)</b>                | 11 (2%)              | 2 (1%)             | 9 (2%)                 |
| <b>Children (e.g., &lt;16 years of age)</b>            | 2 (0%)               | 1 (1%)             | 1 (0%)                 |
| <b>Type of primary outcome</b>                         |                      |                    |                        |
| <b>Death/survival<sup>1</sup></b>                      | 207 (33%)            | 20 (11%)           | 187 (43%)              |
| <b>Clinical status/measures<sup>2</sup></b>            | 124 (20%)            | 73 (38%)           | 51 (12%)               |
| <b>SARS-CoV-2 virology status/measures<sup>3</sup></b> | 61 (10%)             | 29 (15%)           | 32 (7%)                |
| <b>Respiratory status/measures<sup>4</sup></b>         | 54 (9%)              | 19 (10%)           | 35 (8%)                |
| <b>Safety/adverse events<sup>5</sup></b>               | 44 (7%)              | 9 (5%)             | 35 (8%)                |
| <b>Composite outcome involving death<sup>6</sup></b>   | 43 (7%)              | 11 (6%)            | 32 (7%)                |
| <b>Resources measures<sup>7</sup></b>                  | 20 (3%)              | 6 (3%)             | 14 (3%)                |
| <b>Invasive mechanical ventilation</b>                 | 16 (3%)              | 4 (2%)             | 12 (3%)                |
| <b>Admission to intensive care unit</b>                | 11 (2%)              | 1 (1%)             | 10 (2%)                |
| <b>Admission to acute care hospital</b>                | 9 (1%)               | 3 (2%)             | 6 (1%)                 |

| Study characteristics                           | Total (n=630) | RCT (n=190) | Non-RCT (n=440) |
|-------------------------------------------------|---------------|-------------|-----------------|
| <b>Inflammatory status/measures<sup>8</sup></b> | 7 (1%)        | 3 (2%)      | 4 (1%)          |
| <b>Cardiology status/measures<sup>9</sup></b>   | 5 (1%)        | 2 (1%)      | 3 (1%)          |
| <b>Emergency room visit</b>                     | 4 (1%)        | 2 (1%)      | 2 (0%)          |
| <b>Olfactory status/measures<sup>10</sup></b>   | 3 (0%)        | 2 (1%)      | 1 (0%)          |
| <b>Other<sup>11</sup></b>                       | 22 (3%)       | 6 (3%)      | 16 (4%)         |
| <b>Number of effect outcomes</b>                |               |             |                 |
| Median # of outcomes (IQR)                      | 4 (2, 6)      | 6 (4, 9)    | 3 (2, 6)        |
| <b>Number of harm outcomes</b>                  |               |             |                 |
| Median # of outcomes (IQR)                      | 1 (0, 3)      | 2 (1, 5)    | 0 (0, 2)        |

Notes: IQR – interquartile range. \*Other diagnostic modality such as lung imaging or suspected Covid-19 cases. •Case severity according to the clinical spectrum of SARS-CoV-2 infection by the National Institute of Health(25) \*\*Age group as reported in the included studies. <sup>1</sup>Death/survival or time to death. <sup>2</sup>Clinical status/measures such as improvement/deterioration or time to such events. <sup>3</sup>SARS-CoV-2 virology status/measures such as viral load or duration to Polymerase Chain Reaction negative. <sup>3</sup>Respiratory status/measures such as whole lung lesion volumes or blood oxygen saturation. <sup>5</sup>Safety/adverse events such as other infections than SARS-CoV-2, acute kidney injury or drug tolerance. <sup>6</sup>Composite endpoints involving death such as death and invasive mechanical ventilation or death and admission to intensive care unit. <sup>7</sup>Resources measures such as length of hospital stay. <sup>8</sup>Inflammatory status/measures such as plasma levels of C-reactive protein, or changes in ROX index, the ratio of SpO<sub>2</sub>/FIO<sub>2</sub>. <sup>9</sup>Cardiology status/measures such as cardia endpoints with max high-sensitivity cardiac troponin level, and stroke. <sup>10</sup>Olfactory status/measures such as loss of smell and taste. <sup>11</sup>Other primary outcome such as time from Covid-19 symptoms onset to treatment or organ support-free days.

Table 2. Treatment options frequently evaluated in included studies

|                                                   |              |            |                |
|---------------------------------------------------|--------------|------------|----------------|
| <b>All individual treatments</b>                  | <b>Total</b> | <b>RCT</b> | <b>Non-RCT</b> |
| <b>Total</b>                                      | <b>828</b>   | <b>231</b> | <b>597</b>     |
| 1. Tocilizumab                                    | 87 (11%)     | 12 (5%)    | 75 (13%)       |
| 2. Hydroxychloroquine                             | 78 (9%)      | 22 (10%)   | 56 (9%)        |
| 3. Convalescent Plasma                            | 55 (7%)      | 15 (6%)    | 40 (7%)        |
| 4. Steroid                                        | 37 (4%)      | 1 (0%)     | 36 (6%)        |
| 5. Lopinavir/Ritonavir                            | 29 (4%)      | 5 (2%)     | 24 (4%)        |
| 6. Methylprednisolone                             | 26 (3%)      | 3 (1%)     | 23 (4%)        |
| 7. Remdesivir                                     | 25 (3%)      | 16 (7%)    | 9 (2%)         |
| 8. Enoxaparin                                     | 18 (2%)      | 1 (0%)     | 17 (3%)        |
| 9. Hydroxychloroquine/Azithromycin                | 18 (2%)      | 2 (1%)     | 16 (3%)        |
| 10. Anakinra                                      | 16 (2%)      | 2 (1%)     | 14 (2%)        |
| <b>Treatment type - Common single treatment</b>   | <b>Total</b> | <b>RCT</b> | <b>Non-RCT</b> |
| <b>All single treatments</b>                      | <b>712</b>   | <b>202</b> | <b>510</b>     |
| 1. NS-Immunosuppressant                           | 126 (18%)    | 27 (13%)   | 99 (19%)       |
| 2. Steroid                                        | 110 (15%)    | 15 (7%)    | 95 (19%)       |
| 3. Antiviral                                      | 97 (14%)     | 40 (20%)   | 57 (11%)       |
| 4. Antimalarial                                   | 87 (12%)     | 25 (12%)   | 62 (12%)       |
| 5. Anticoagulant                                  | 66 (5%)      | 5 (3%)     | 61 (12%)       |
| Anticoagulant-Therapeutic                         | 17 (2%)      | 2 (1%)     | 15 (3%)        |
| Anticoagulant-Prophylactic                        | 14 (2%)      | 0 (0%)     | 14 (3%)        |
| 6. Convalescent Plasma                            | 56 (8%)      | 16 (8%)    | 40 (8%)        |
| 7. Antibiotic                                     | 29 (4%)      | 7 (3%)     | 22 (4%)        |
| 8. Anti-Inflammatory                              | 20 (3%)      | 8 (4%)     | 12 (2%)        |
| 9. Interferon Therapy                             | 16 (2%)      | 7 (3%)     | 9 (2%)         |
| 10. Anti-parasitic                                | 14 (2%)      | 12 (6%)    | 2 (0%)         |
| 10. Immunomodulatory                              | 14 (2%)      | 4 (2%)     | 10 (2%)        |
| <b>Treatment type – Common combined treatment</b> |              |            |                |
| <b>All combined treatment option</b>              | <b>116</b>   | <b>29</b>  | <b>87</b>      |
| 1. Antimalarial/Antibiotic                        | 19 (16%)     | 2 (7%)     | 17 (20%)       |
| 2. Steroid/NS-Immunosuppressant                   | 10 (9%)      | 0 (0%)     | 10 (11%)       |
| 3. Antimalarial/Antiviral/Antiviral               | 8 (7%)       | 1 (3%)     | 7 (8%)         |
| 4. Antiviral/Antiviral                            | 5 (4%)       | 3 (10%)    | 2 (2%)         |
| 4. Antiviral/Interferon                           | 5 (4%)       | 0 (0%)     | 5 (6%)         |
| 5. Antimalarial/Antiviral                         | 4 (3%)       | 0 (0%)     | 4 (5%)         |
| 5. Antimalarial/Antiviral/Antibiotic              | 4 (3%)       | 4 (14%)    | 0 (0%)         |
| 5. Anti-parasitic/Antibiotic                      | 4 (3%)       | 3 (10%)    | 1 (1%)         |
| 5. Antiviral/Antiviral/Antiviral                  | 4 (3%)       | 0 (0%)     | 4 (5%)         |

|                                                    |        |         |        |
|----------------------------------------------------|--------|---------|--------|
| <b>5. Antiviral/Antiviral/Antiviral/Interferon</b> | 4 (3%) | 0 (0%)  | 4 (5%) |
| <b>5. Antiviral/NS-Immunosuppressant</b>           | 4 (3%) | 3 (10%) | 1 (1%) |
| <b>5. NS-Immunosuppressant/Steroid</b>             | 4 (3%) | 0 (0%)  | 4 (5%) |

Note: NS-immunosuppressant: non-steroidal immunosuppressant.

For peer review only



**Table 3. Evidence Synthesis characteristics**

|                                              | <b>All<br/>(n=303)</b> | <b>With protocol<br/>(n=89)</b> | <b>Without protocol<br/>(n=214)</b> |
|----------------------------------------------|------------------------|---------------------------------|-------------------------------------|
| <b>Review type</b>                           |                        |                                 |                                     |
| Systematic review with meta-analysis         | 192 (63%)              | 67 (75%)                        | 125 (58%)                           |
| Systematic review                            | 73 (24%)               | 15 (17%)                        | 58 (27%)                            |
| Meta-analysis                                | 13 (4%)                | 0 (0%)                          | 13 (6%)                             |
| Scoping review                               | 10 (3%)                | 3 (3%)                          | 7 (3%)                              |
| Rapid review                                 | 8 (3%)                 | 1 (1%)                          | 7 (3%)                              |
| Network meta-analysis                        | 2 (1%)                 | 1 (1%)                          | 1 (0%)                              |
| Rapid review with meta-analysis              | 2 (1%)                 | 1 (1%)                          | 1 (0%)                              |
| Systematic review with network meta-analysis | 2 (1%)                 | 0 (0%)                          | 2 (1%)                              |
| Overview of systematic reviews               | 1 (0%)                 | 1 (1%)                          | 0 (0%)                              |
| <b>Review abstract</b>                       |                        |                                 |                                     |
| Structured abstract                          | 161 (53%)              | 47 (53%)                        | 114 (53%)                           |
| Abstract with no structure                   | 142 (47%)              | 42 (47%)                        | 100 (47%)                           |
| <b>Eligibility criteria</b>                  |                        |                                 |                                     |
| Report eligibility criteria                  | 263 (87%)              | 87 (98%)                        | 176 (82%)                           |
| Eligibility criteria are unclear             | 40 (13%)               | 2 (2%)                          | 38 (18%)                            |
| <b>Include randomized controlled trials</b>  |                        |                                 |                                     |
| Include randomized controlled trials only    | 51 (17%)               | 18 (20%)                        | 33 (15%)                            |
| Include studies of different study designs   | 252 (83%)              | 71 (80%)                        | 181 (85%)                           |
| <b>Number of data sources</b>                |                        |                                 |                                     |
| Median (IQR)                                 | 5 (3, 6)               | 5.5 (4, 7)                      | 4 (3, 6)                            |
| <b>Number of included studies</b>            |                        |                                 |                                     |
| Median (IQR)                                 | 14 (7, 29)             | 16 (7, 37)                      | 14 (7, 26)                          |
| <b>Common country</b>                        |                        |                                 |                                     |
| 1. United States                             | 59 (19%)               | 13 (15%)                        | 46 (21%)                            |
| 2. China                                     | 41 (14%)               | 13 (15%)                        | 28 (13%)                            |
| 3. India                                     | 34 (11%)               | 12 (13%)                        | 22 (10%)                            |
| 4. Iran                                      | 18 (6%)                | 3 (3%)                          | 15 (7%)                             |
| 4. United Kingdom                            | 18 (6%)                | 3 (3%)                          | 15 (7%)                             |
| 5. Saudi Arabia                              | 13 (4%)                | 1 (1%)                          | 12 (6%)                             |
| 6. Canada                                    | 12 (4%)                | 5 (6%)                          | 7 (3%)                              |
| 7. Italy                                     | 12 (4%)                | 8 (9%)                          | 4 (2%)                              |
| 8. Indonesia                                 | 9 (3%)                 | 2 (2%)                          | 7 (3%)                              |
| 9. Malaysia                                  | 7 (2%)                 | 0 (0%)                          | 7 (3%)                              |
| 10. France                                   | 6 (2%)                 | 4 (4%)                          | 2 (1%)                              |

**Table 4. Treatment options evaluated in systematic reviews**

| <b>All evaluated treatment options</b> | <b>Total (n=540)</b> | <b>With protocol (n=154)</b> | <b>Without protocol (n=386)</b> |
|----------------------------------------|----------------------|------------------------------|---------------------------------|
|                                        | 61                   |                              |                                 |
| Steroid                                | (11%)                | 14 (9%)                      | 47 (12%)                        |
|                                        | 60                   |                              |                                 |
| Hydroxychloroquine                     | (11%)                | 16 (10%)                     | 44 (11%)                        |
| Remdesivir                             | 40 (7%)              | 11 (7%)                      | 29 (8%)                         |
| Tocilizumab                            | 36 (7%)              | 10 (6%)                      | 26 (7%)                         |
| Convalescent plasma                    | 35 (6%)              | 11 (7%)                      | 24 (6%)                         |
| Lopinavir-ritonavir                    | 24 (4%)              | 8 (5%)                       | 16 (4%)                         |
| Chloroquine                            | 20 (4%)              | 6 (4%)                       | 14 (4%)                         |
| Antiviral                              | 14 (3%)              | 4 (3%)                       | 10 (3%)                         |
| Anticoagulant                          | 11 (2%)              | 2 (1%)                       | 9 (2%)                          |
| Azithromycin                           | 11 (2%)              | 3 (2%)                       | 8 (2%)                          |
| Hydroxychloroquine/azithromycin        | 11 (2%)              | 1 (1%)                       | 10 (3%)                         |
| Favipiravir                            | 10 (2%)              | 1 (1%)                       | 9 (2%)                          |
| Intravenous immunoglobulin             | 10 (2%)              | 2 (1%)                       | 8 (2%)                          |
| Colchicine                             | 9 (2%)               | 2 (1%)                       | 7 (2%)                          |
| Arbidol                                | 7 (1%)               | 1 (1%)                       | 6 (2%)                          |
| Chloroquine/hcq                        | 7 (1%)               | 1 (1%)                       | 6 (2%)                          |
| Ivermectin                             | 7 (1%)               | 3 (2%)                       | 4 (1%)                          |
| Anticoagulant therapeutic              | 6 (1%)               | 3 (2%)                       | 3 (1%)                          |
| Covid-19 treatments                    | 5 (1%)               | 3 (2%)                       | 2 (1%)                          |
| Cell-based therapies                   | 5 (1%)               | 2 (1%)                       | 3 (1%)                          |
| Anakinra                               | 4 (1%)               | 3 (2%)                       | 1 (0%)                          |
| Antibiotics                            | 4 (1%)               | 1 (1%)                       | 3 (1%)                          |
| Famotidine                             | 4 (1%)               | 1 (1%)                       | 3 (1%)                          |
| Hydroxychloroquine/chloroquine         | 4 (1%)               | 3 (2%)                       | 1 (0%)                          |
| Immunomodulator                        | 4 (1%)               | 1 (1%)                       | 3 (1%)                          |
| Interleukin-6 inhibitors               | 4 (1%)               | 2 (1%)                       | 2 (1%)                          |
| JAK-inhibitors                         | 4 (1%)               | 2 (1%)                       | 2 (1%)                          |
| Sarilumab                              | 4 (1%)               | 4 (3%)                       | 0 (0%)                          |

Note: JAK-inhibitors: Janus kinase (JAK) inhibitors

**Table 5. Treatment evaluation according to authors' conclusion**

| <b>Studies evaluating treatment benefits/harms</b> | <b>All studies</b> | <b>RCT</b>           | <b>Non-RCT</b>          |
|----------------------------------------------------|--------------------|----------------------|-------------------------|
| # of evaluated treatment arms                      | 827                | 231                  | 596                     |
| Favor evaluated treatment                          | 413 (50%)          | 120 (52%)            | 293 (49%)               |
| Favor control                                      | 63 (8%)            | 15 (7%)              | 48 (8%)                 |
| Indeterminate/neutral                              | 258 (31%)          | 90 (39%)             | 168 (28%)               |
| <b>Reviews evaluating treatment benefits/harms</b> | <b>All reviews</b> | <b>With protocol</b> | <b>Without protocol</b> |
| # of evaluated treatment arms                      | 540                | 154                  | 386                     |
| Favor evaluated treatment                          | 187 (35%)          | 50 (32%)             | 137 (35%)               |
| Favor control                                      | 71 (13%)           | 19 (12%)             | 52 (13%)                |
| Indeterminate/neutral                              | 182 (34%)          | 68 (44%)             | 114 (30%)               |

## REFERENCES

1. Organization WH. Novel Coronavirus (2019-nCoV): situation report, 22: World Health Organization; 2020 [updated February 11, 2020; cited 2020 August 18]. Available from: [https://www.who.int/docs/default-source/coronaviruse/situation-reports/20200211-sitrep-22-ncov.pdf?sfvrsn=fb6d49b1\\_2](https://www.who.int/docs/default-source/coronaviruse/situation-reports/20200211-sitrep-22-ncov.pdf?sfvrsn=fb6d49b1_2).
2. Organization WH. Coronavirus disease 2019 (COVID-19) Situation Report – 101 2020 [updated April 30, 2020; cited 2020 August 18]. Available from: [https://www.who.int/docs/default-source/coronaviruse/situation-reports/20200430-sitrep-101-covid-19.pdf?sfvrsn=2ba4e093\\_2](https://www.who.int/docs/default-source/coronaviruse/situation-reports/20200430-sitrep-101-covid-19.pdf?sfvrsn=2ba4e093_2).
3. ClinicalTrials.gov [Internet]. Bethesda (MD): National Library of Medicine (US). 2000 Feb 29
4. PROSPERO - International prospective register of systematic reviews.
5. Ahmad A, Salsabil M, Oliver T. Mortality rates in matched cohort, pseudo-randomised and randomised trials of convalescent plasma given to COVID-19 patients. medRxiv. 2020.
6. Bhowmick S, Dang A, Vallish B, Dang S. Safety and Efficacy of Ivermectin and Doxycycline Monotherapy and in Combination in the Treatment of COVID-19: A Scoping Review. *Drug Saf.* 2021:1-10.
7. Liao G, Zheng K, Lalu MM, Fergusson DA, Allan DS. A scoping review of registered clinical trials of cellular therapy for COVID-19 and a Framework for Accelerated Synthesis of Trial Evidence—FAST evidence. *Transfus Med Rev.* 2020;34(3):165-71.
8. Mori H, Ohkawara H, Togawa R, Rikimaru M, Shibata Y, Ikezoe T. Diagnosis and treatment of disseminated intravascular coagulation in COVID-19 patients: a scoping review. *Int J Hematol.* 2021:1-10.
9. Tritschler T, Mathieu ME, Skeith L, Rodger M, Middeldorp S, Brighton T, et al. Anticoagulant interventions in hospitalized patients with COVID-19: A scoping review of randomized controlled trials and call for international collaboration. *J Thromb Haemos.* 2020;18(11):2958-67.
10. JBI Manual for Evidence Synthesis 2020 [cited 2020 August 18]. Available from: <https://synthesismanual.jbi.global>.
11. McGowan J, Sampson M, Salzwedel DM, Cogo E, Foerster V, Lefebvre C. PRESS Peer Review of Electronic Search Strategies: 2015 Guideline Statement. *J Clin Epidemiol.* 2016;75:40-6.
12. Tricco AC, Lillie E, Zarin W, O'Brien KK, Colquhoun H, Levac D, et al. PRISMA Extension for Scoping Reviews (PRISMA-ScR): Checklist and Explanation. *Ann Intern Med.* 2018;169(7):467-73.
13. Peters MD, Marnie C, Tricco AC, Pollock D, Munn Z, Alexander L, et al. Updated methodological guidance for the conduct of scoping reviews. *JBI Evid Synth.* 2020;18(10):2119-26.
14. Cormack GV, Grossman MR. Technology-Assisted Review in Empirical Medicine: Waterloo Participation in CLEF eHealth 2018 2018 [cited 2020 August 18]. Available from: [http://ceur-ws.org/Vol-2125/paper\\_89.pdf](http://ceur-ws.org/Vol-2125/paper_89.pdf).
15. Wishart DS, Feunang YD, Guo AC, Lo EJ, Marcu A, Grant JR, et al. DrugBank 5.0: a major update to the DrugBank database for 2018. *Nucleic Acids Res.* 2018;46(D1):D1074-D82.

16. Venkatesulu BP, Thoguluva Chandrasekar V, Giridhar P, Patel HK, Manteuffel J. The mechanistic rationale of drugs, primary endpoints, geographical distribution of clinical trials against severe acute respiratory syndrome-related coronavirus-2: A systematic review. *J Med Virol.* 2021;93(2):843-53.
17. Valerio Pascua F, Diaz O, Medina R, Contreras B, Mistroff J, Espinosa D, et al. A multi-mechanism approach reduces length of stay in the ICU for severe COVID-19 patients. *PLoS One.* 2021;16(1):e0245025.
18. Tricco AC, Tetzlaff J, Brehaut J, Moher D. Non-Cochrane vs. Cochrane reviews were twice as likely to have positive conclusion statements: cross-sectional study. *J Clin Epidemiol.* 2009;62(4):380-6. e1.
19. Monod M, Blenkinsop A, Xi X, Hebert D, Bershan S, Tietze S, et al. Age groups that sustain resurging COVID-19 epidemics in the United States. *Science.* 2021;371(6536):eabe8372.
20. Tran Kiem C, Bosetti P, Paireau J, Crepey P, Salje H, Lefrancq N, et al. SARS-CoV-2 transmission across age groups in France and implications for control. *Nat Commun.* 2021;12(1):1-12.
21. Boutron I, Page MJ, Higgins JPT, Altman DG, Lundh A, A H. Chapter 7: Considering bias and conflicts of interest among the included studies. In: Higgins JPT, Thomas J, Chandler J, Cumpston M, Li T, Page MJ, et al., editors. *Cochrane Handbook for Systematic Reviews of Interventions* version 6.2 (updated February 2021): Cochrane 2021; 2021.
22. Chaimani A, Caldwell DM, Li T, Higgins JP, Salanti G. Chapter 11: Undertaking network meta-analyses. *Cochrane Handbook for Systematic Reviews of Interventions.* 2019;6.
23. Thomas J, Askie L, Berlin J. Chapter 22: Prospective approaches to accumulating evidence: Higgins JPT, Thomas J, Chandler J, et al., *Cochrane Handbook for Systematic Reviews of Interventions.* version 6.0 (updated July 2019) Cochrane, 2019.
24. Akl EA, Meerpohl JJ, Elliott J, Kahale LA, Schünemann HJ, Agoritsas T, et al. Living systematic reviews: 4. Living guideline recommendations. *J Clin Epidemiol.* 2017;91:47-53.
25. National Institute of Health. Clinical Spectrum of SARS-CoV-2 Infection 2021 [Available from: <https://www.covid19treatmentguidelines.nih.gov/overview/clinical-spectrum/>].

**Figure 1. Flow diagram of included studies**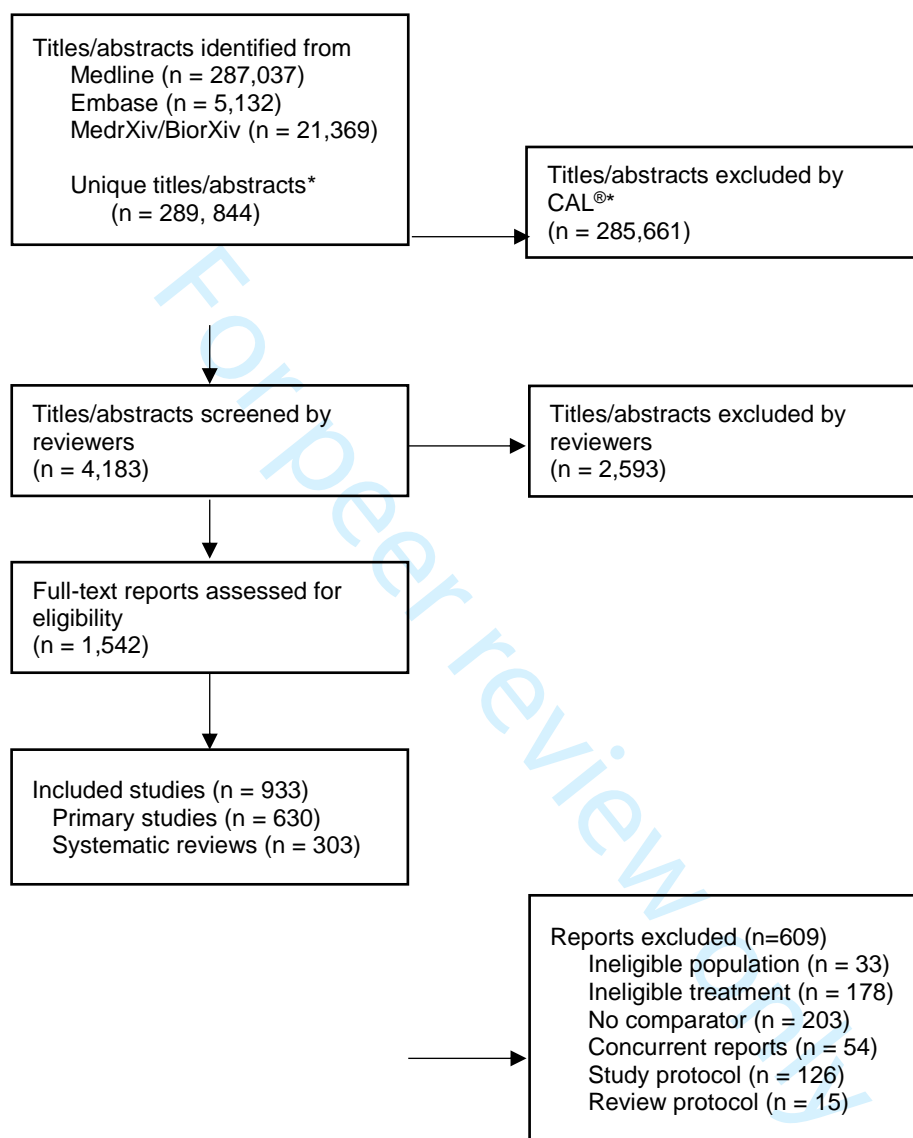

Notes: \*Estimated number of unique titles/abstracts based upon: Medline (Ovid) includes preprints on Covid-19 from Medrxiv and Biorxiv, and large overlapping records between Medline and Embase. The flowchart was modified from the PRISMA 2020 statement.<sup>25</sup>

**Figure 2. Timing of available online of included studies\***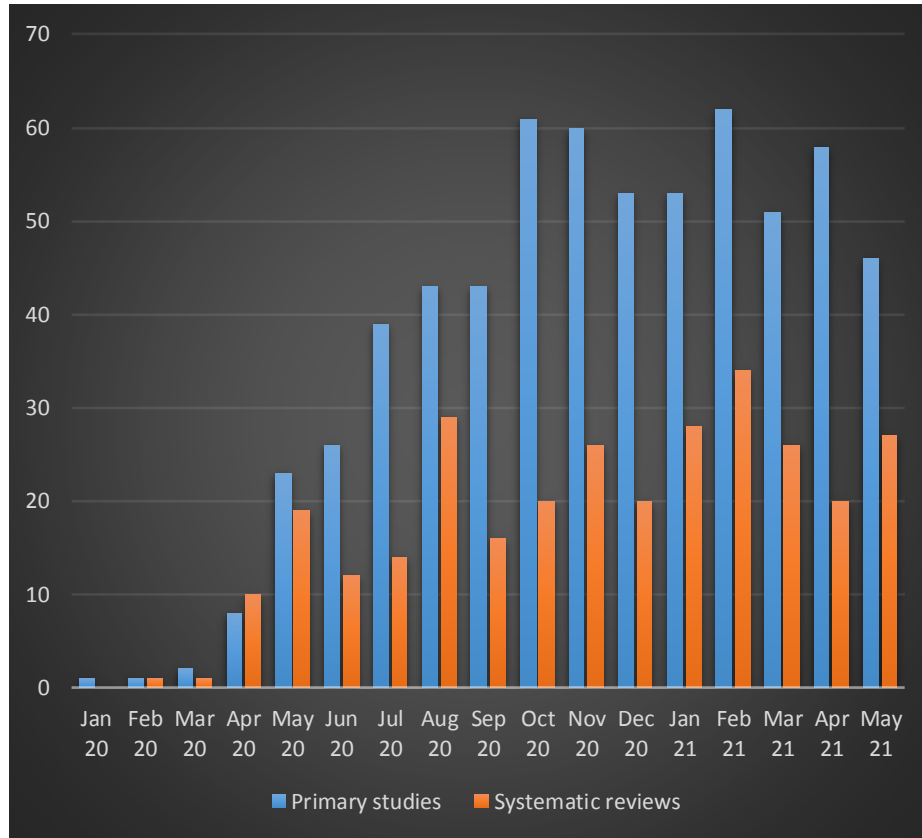

Notes: The numbers of primary studies and systematic reviews for May 21 are higher because the literature search ended at May 15, 2021.

## Comparative-effectiveness research of COVID-19 treatment: A rapid scoping review

### Appendices

#### Contents

|                                                                                       |    |
|---------------------------------------------------------------------------------------|----|
| Appendix 1. The Continuous Active Learning (CAL <sup>®</sup> ) tool .....             | 1  |
| Appendix 2. EMBASE search strategy .....                                              | 2  |
| Appendix 3. List of drugs from Health Canada and Public Health Agency of Canada ..... | 8  |
| Appendix 4. List of included primary studies .....                                    | 10 |
| Appendix 5. List of included knowledge syntheses .....                                | 59 |
| Appendix 6. Additional details for the Results section .....                          | 81 |
| Figure A1. Word cloud of description of study participants .....                      | 81 |
| Table A1. Country of primary study conduct .....                                      | 82 |
| Table A2. Treatment type of single treatment .....                                    | 93 |
| Table A3. Treatment type of combination treatment .....                               | 94 |
| Table A4. Country of knowledge synthesis conduct .....                                | 96 |
| Table A5. Treatment evaluated in knowledge syntheses .....                            | 97 |

#### Appendix 1. The Continuous Active Learning (CAL<sup>®</sup>) tool

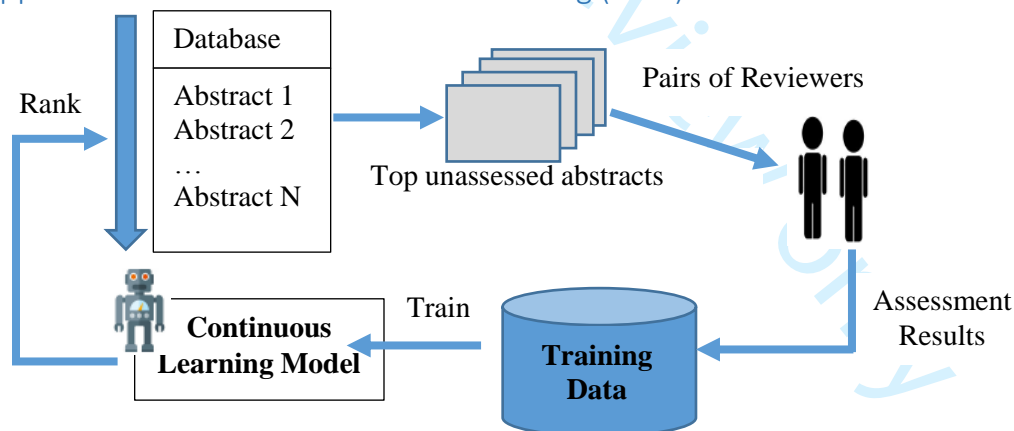

Figure. The algorithm of the CAL<sup>®</sup> tool

The above figure illustrates the algorithm in the CAL<sup>®</sup> tool. Text of the review question is used to start training the machine-learning model in the Continuous Active Learning (CAL) method. The CAL model predicts and quantifies the relevance of abstracts from a database. The abstracts are ranked in order of highest to lowest relevance. The top ranked abstracts are presented to a pair of human reviewers for relevance screening. The screening results are used to update the CAL model for better prediction, generating another batch of top ranked abstracts for screening in the next iteration of the feedback loop. The goal is to identify all relevant abstracts with minimum screening effort.



## Comparative-effectiveness research of COVID-19 treatment: A rapid scoping review

We selected the CAL<sup>®</sup> tool because it won multiple international competitions in high-recall information retrieval – the process of retrieving all relevant documents with minimal human effort (Table below)

Table. Summary of evidence on the use of the CAL<sup>®</sup> tool for knowledge synthesis conduct

| International Competition                                    | High-recall tasks                                | Key findings                                                                                                                                                                                                                                                                       |
|--------------------------------------------------------------|--------------------------------------------------|------------------------------------------------------------------------------------------------------------------------------------------------------------------------------------------------------------------------------------------------------------------------------------|
| Conference and Labs of the Evaluation Forum 2018 (1)         | 30 systematic reviews of diagnostic test studies | <i>Task 1:</i> Without any manual effort to construct literature search strategies, the CAL <sup>®</sup> tool was the most accurate with 97% recall (sensitivity). <i>Task 2:</i> For screening literature search results, CAL <sup>®</sup> was the most accurate with 99% recall. |
| Conference and Labs of the Evaluation Forum 2017 (2)         | 50 systematic reviews of diagnostic test studies | The CAL <sup>®</sup> tool was a top performer among the 14 tested with 97% to 100% recall at pre-defined stopping threshold.                                                                                                                                                       |
| Text Retrieval Conference Total Recall Tracks 2015/16 (3, 4) | 8 legal, clinical, news, email collections       | The CAL <sup>®</sup> tool attained an overall effectiveness not surpassed by any submitted method, manual or automatic.                                                                                                                                                            |

For archives that could be retrieved in their entirety (e.g., MEDLINE, pre-print servers), the CAL<sup>®</sup> tool applied broad relevant search terms using the following Posix command:

```
egrep -i 'coronav|corona vir|wuhan|hubei|huanan|[^a-z]ncov|cov2|cov.2|novel.cov|covid|sars-cov'
```

### References

1. Evangelos Kanoulas, Dan Li, Leif Azzopardi, et al. CLEF 2018 Technologically Assisted Reviews in Empirical Medicine Overview. 2018.
2. Kanoulas E, Li D, Azzopardi L, et al. CLEF 2017 technologically assisted reviews in empirical medicine overview. CEUR Workshop Proceedings, 2017.
3. Roegiest A, Cormack G, Grossman M, et al. TREC 2015 Total Recall track overview TREC. 2015.
4. Cormack GV, MR G. Multi-faceted recall of Continuous Active Learning for Technology-Assisted Review. SIGIR 2015, 2015.

### Appendix 2. EMBASE search strategy

#### Database:

Embase Classic+Embase <1947 to 2021 July 08>

| # | Query                                                                                                                                                           |
|---|-----------------------------------------------------------------------------------------------------------------------------------------------------------------|
| 1 | exp coronaviridae/ or exp Coronaviridae infection/ or exp Coronavirus infection/                                                                                |
| 2 | ((wuhan or hubei or huanan) and (severe acute respiratory or pneumonia* or virus*) and outbreak*).mp.                                                           |
| 3 | (coronavir* or "corona virus*" or "coronavirus pneumonia" or betacoronavir* or COVID or COVID-19).mp.                                                           |
| 4 | ("nCoV" or "cov 2" or cov2 or 2019ncov or 2019-nCoV or "2019 ncov" or "2019-ncov" or "2019 novel cov" or "2019 ncov disease*" or "2019 novel coronavirus*").mp. |
| 5 | "wuhan virus*".mp.                                                                                                                                              |



## Comparative-effectiveness research of COVID-19 treatment: A rapid scoping review

|                                                                                           |                                                                                                                                                                                                                                                                                                                                                                                                                                                                                                                                                                                                                                                                                                                                                                                                                                                                                                                                                                                                                                                                                                                                                       |
|-------------------------------------------------------------------------------------------|-------------------------------------------------------------------------------------------------------------------------------------------------------------------------------------------------------------------------------------------------------------------------------------------------------------------------------------------------------------------------------------------------------------------------------------------------------------------------------------------------------------------------------------------------------------------------------------------------------------------------------------------------------------------------------------------------------------------------------------------------------------------------------------------------------------------------------------------------------------------------------------------------------------------------------------------------------------------------------------------------------------------------------------------------------------------------------------------------------------------------------------------------------|
| 1<br>2<br>3<br>4<br>5<br>6<br>7<br>8<br>9<br>10<br>11<br>12<br>13<br>14<br>15<br>16<br>17 | arequine or arthrochin or arthrochine or arthroquine or artrichin or artrichine or artriquine or avlocloer or bemaphata or bemaphate or bemasulph or bipiquin or cadiquin or chemochin or chemochine or chingamine or chingaminum or chloraquine or chlorochin or chlorochine or chlorofoz or chloroquin or chloroquin* or cidanchin or "clo-kit junior" or clorichina or clorichine or cloriquine or clorochina or delagil or delagyl or dichinalex or diclokin or diquinalex or diroquine or emquin or genocin or gontochin or gontochine or gontoquine or heliopar or imagon or iroquine or klorokin or klorokine or klorokinfosfat or lagaquin or malaquin or malarex or malarivon or malaviron or maliaquine or maquine or mesylith or mexaquin or mirquin or nivachine or nivaquin* or roquine or quinachl or quingamine or repal or resochoen* or resochoin or resochoina or resochoine or resochoinon resoquina or resoquine or reumachlor or roquine or rp3377 or sanoquin or sanoquine or silbesan or siragan or sirajan or sn7618 or solprina or solprine or tresochin or tresochine or tresoquine or trochin or trochine or troquine).tw. |
| 18<br>19                                                                                  | 16 suramin/                                                                                                                                                                                                                                                                                                                                                                                                                                                                                                                                                                                                                                                                                                                                                                                                                                                                                                                                                                                                                                                                                                                                           |
| 20<br>21                                                                                  | 17 (Carriomycin or Suramin).tw.                                                                                                                                                                                                                                                                                                                                                                                                                                                                                                                                                                                                                                                                                                                                                                                                                                                                                                                                                                                                                                                                                                                       |
| 22<br>23<br>24                                                                            | 18 exp steroid/ or exp meprednisone/ or exp corticosteroid/ or fingolimod/ or leflunomide/ or thalidomide/                                                                                                                                                                                                                                                                                                                                                                                                                                                                                                                                                                                                                                                                                                                                                                                                                                                                                                                                                                                                                                            |
| 25<br>26<br>27                                                                            | 19 (steroid* or methylprednisone or meprednisone or Prednisolone or Fluprednisolone or Corticosteroid* or Fingolimod or Leflunomid* or Thalidomid*).tw.                                                                                                                                                                                                                                                                                                                                                                                                                                                                                                                                                                                                                                                                                                                                                                                                                                                                                                                                                                                               |
| 28<br>29                                                                                  | 20 ruxolitinib/                                                                                                                                                                                                                                                                                                                                                                                                                                                                                                                                                                                                                                                                                                                                                                                                                                                                                                                                                                                                                                                                                                                                       |
| 30<br>31                                                                                  | 21 (Jakotinib or Ruxolitinib).tw.                                                                                                                                                                                                                                                                                                                                                                                                                                                                                                                                                                                                                                                                                                                                                                                                                                                                                                                                                                                                                                                                                                                     |
| 32<br>33                                                                                  | 22 exp monoclonal antibody/                                                                                                                                                                                                                                                                                                                                                                                                                                                                                                                                                                                                                                                                                                                                                                                                                                                                                                                                                                                                                                                                                                                           |
| 34<br>35<br>36<br>37                                                                      | 23 (Ruxolitinib or Tocilizumab or Adalimumab or Camrelizumab or Eculizumab or Mepolizumab or "PD-1 mAb" or Tocilizumab or Adamumab or tozumab or meplazumab or monoclonal antibod*).tw.                                                                                                                                                                                                                                                                                                                                                                                                                                                                                                                                                                                                                                                                                                                                                                                                                                                                                                                                                               |
| 38<br>39<br>40                                                                            | 24 ("SARS-Cov-2 specific neutralizing antibod*" or "SARS-Cov specific neutralizing antibod*" or "MERS-Cov specific neutralizing antibod*" or "Anti C5a monoclonal antibod*").tw.                                                                                                                                                                                                                                                                                                                                                                                                                                                                                                                                                                                                                                                                                                                                                                                                                                                                                                                                                                      |
| 41<br>42<br>43<br>44                                                                      | 25 acetylcysteine/ or exp angiotensin receptor antagonist/ or exp angiotensin derivative/ or exp dipeptidyl carboxypeptidase inhibitor/ or citrate potassium/ or glycyrrhizic acid/ or dipyridamole/ or hydrogen peroxide/ or polyinosinic polycytidylic acid/ or thymosin/ or ascorbic acid/                                                                                                                                                                                                                                                                                                                                                                                                                                                                                                                                                                                                                                                                                                                                                                                                                                                         |
| 45<br>46<br>47<br>48<br>49<br>50<br>51                                                    | 26 (Acetylcysteine or Angiotensin or Angiotensin or "ACE inhibitor*" or ACE-2 or "Angiotensin II receptor blocker*" or ARBs or "potassium citrate" or Bromhexine or "Diammonium glycyrrhizinate" or Glycyrrhizic or Dipyridamole or Ebastine or "Hydrogen peroxide" or Pirfenidone or Polyinosinic-polycytidylic or "Polyinosinic-polycytidylic" or "Poly I-C" or "rhG-CSF" or Thymosin* or Tranilast or "Vitamin C" or "Ascorbic Acid*").tw.                                                                                                                                                                                                                                                                                                                                                                                                                                                                                                                                                                                                                                                                                                         |
| 52<br>53                                                                                  | 27 ("inhal*" adj2 gas*).tw.                                                                                                                                                                                                                                                                                                                                                                                                                                                                                                                                                                                                                                                                                                                                                                                                                                                                                                                                                                                                                                                                                                                           |
| 54<br>55<br>56                                                                            | 28 Cyclosporine/                                                                                                                                                                                                                                                                                                                                                                                                                                                                                                                                                                                                                                                                                                                                                                                                                                                                                                                                                                                                                                                                                                                                      |

## Comparative-effectiveness research of COVID-19 treatment: A rapid scoping review

|    |                                                                                                                                                                                                                                                                                                                                                                                                                                                                                                                                                                                                                                                                                                                                                                                                                                                                                                                                                                                                                                                                                                                                                                                                                                                                                                                                                                                                                                                                                                                  |
|----|------------------------------------------------------------------------------------------------------------------------------------------------------------------------------------------------------------------------------------------------------------------------------------------------------------------------------------------------------------------------------------------------------------------------------------------------------------------------------------------------------------------------------------------------------------------------------------------------------------------------------------------------------------------------------------------------------------------------------------------------------------------------------------------------------------------------------------------------------------------------------------------------------------------------------------------------------------------------------------------------------------------------------------------------------------------------------------------------------------------------------------------------------------------------------------------------------------------------------------------------------------------------------------------------------------------------------------------------------------------------------------------------------------------------------------------------------------------------------------------------------------------|
| 29 | (Cyclosporin or cequa or "cgc 1072" or "cgc1072" or ciclomulsion or cyclasol or de076 or deximune or implanta or imusporin or neuro-stat or neurostat or opsisorin or "otx 101" or padciclo or papilock or "sp 14019" or verkazia).tw.                                                                                                                                                                                                                                                                                                                                                                                                                                                                                                                                                                                                                                                                                                                                                                                                                                                                                                                                                                                                                                                                                                                                                                                                                                                                           |
| 30 | Fenretinide/                                                                                                                                                                                                                                                                                                                                                                                                                                                                                                                                                                                                                                                                                                                                                                                                                                                                                                                                                                                                                                                                                                                                                                                                                                                                                                                                                                                                                                                                                                     |
| 31 | (fenretinide or "mcn r 1967" or "4 hydroxyphenylretinamide" or Ifendopril).tw.                                                                                                                                                                                                                                                                                                                                                                                                                                                                                                                                                                                                                                                                                                                                                                                                                                                                                                                                                                                                                                                                                                                                                                                                                                                                                                                                                                                                                                   |
| 32 | Dalteparin/ or enoxaparin/ or tinzaparin/ or fondaparinux/ or edoxaban/ or rivaroxaban/ or apixaban/ or betrixaban/ or heparin/ or danaparoid/ or warfarin/ or dabigatran.hw.                                                                                                                                                                                                                                                                                                                                                                                                                                                                                                                                                                                                                                                                                                                                                                                                                                                                                                                                                                                                                                                                                                                                                                                                                                                                                                                                    |
| 33 | (dalteparin or fragmin* or "low liquemin" or enoxaparin or clexan or clexane or inhixa or lexane or lovenox or neoparin or neoparin-nx or thorinane or tinzaparin or innohep or logiparin or fondaparinux or quixidar or dabigatran or edoxaban or lixiana or roteas or savaysa or rivaroxaban or xarelto or "bay 59 7939" or apixaban or eliques or eliquis or warfarin or adoisine or carfin or coumadan or coumadin* or marevan or panwarfarin or panwarfin or sofarin or warnerin or betrixaban or bevyxxa or dextience or heparin or Disebrin or hepalean or lipo-hepin or menaven or multiparin or nevpargin or panheparin or panheprin or praecivenin or thrombareduct or thromboliquine or vetren or danaparoid or lomoparan or orgaran).tw.                                                                                                                                                                                                                                                                                                                                                                                                                                                                                                                                                                                                                                                                                                                                                             |
| 34 | (Azilsartan or candesartan or eprosartan or Irbesartan or telmisartan or valsartan or losartan or olmesartan).hw. or cobicistat/ or losartan/                                                                                                                                                                                                                                                                                                                                                                                                                                                                                                                                                                                                                                                                                                                                                                                                                                                                                                                                                                                                                                                                                                                                                                                                                                                                                                                                                                    |
| 35 | (Azilsartan or Edarbi or "tak 536" or tak536 or candesartan or amcandin or amlodipine or amlopres or camlostar or candam or candeamio or candezek or caramlo or framsyl or unisia or zenicamo or Atacand or eprosartan or epratenz or futuran or naviten or navixen or regulaten or "skf 108566" or "skf108566" or tevesten or tevetan or teveten or tevetenz or Irbesartan or irbertan or Avapro or telmisartan or approvel or aprovel or "arbez lr" or avapro or ifirmasta or irban or irbetan or iretensa or irovel or irvell or karvea or sabervel or Micardis or valsartan or Diovan* or Prexxartan or saval or losartan or Cozaar or entrizen or lavestra or lorista or Olmesartan or Benicar or sarten or entresto or sacubitril or valsartan or byvalson or neбиволол or Aviptadil or Losartan or cozaar or cobicistat or tybost or actelsar or kinzal mono or kinzalmono or micardis or predxal or pritor or pritoral or semintra or telma-20 or tolura or angiosan or cordinate or dalzad ordiovan or diovane or kalpress or miten or nisis or prexxartan or provas or rixil or saval or tareg or tazea or troval or valpression or vals or valsocard or valtán or valtsu or alteis or belsar or benetor or benevas or benicar or cs866 or ixia or laresin or mencord or mesar or olartan or olmeblo or olmec or olmes or Olmesartan or olmetec or olpresor olsar or omesar or openvas or plaunac or rnh6270 or santini or sarten or tensar or tensiol or vivactra or votum or byvalson or cozaar).tw. |
| 36 | (benazepril or Captopril or Cilazapril or Enalapril or Fosinopril or Lisinopril or Perindopril Quinapril or Ramipril or Trandolapril).hw.                                                                                                                                                                                                                                                                                                                                                                                                                                                                                                                                                                                                                                                                                                                                                                                                                                                                                                                                                                                                                                                                                                                                                                                                                                                                                                                                                                        |
| 37 | (Benazepril or Lotensin or Captopril or Benace or boncordin or briem or brien or "cgs 148241" or "cgs 14824a" or "cgs148241" or "cgs14824a" or cibace or cibacen* or fortekor or lotensin or tenkuoren or zinadril or ace-bloc or acenorm or acepress or acepril or aceprilex or aceril or aceten or adocor or alopresin or altran or apuzin or asisten or capace or capocard or caposan or capoten* capotril or capril or captace or captensin or capti or captoflux or captohexal or captolane or captomax or capton or captopren or captoprilan or captoril or captral or cardiopril or cardipril or                                                                                                                                                                                                                                                                                                                                                                                                                                                                                                                                                                                                                                                                                                                                                                                                                                                                                                          |

## Comparative-effectiveness research of COVID-19 treatment: A rapid scoping review

|                                                                                                                |                                                                                                                                                                                                                                                                                                                                                                                                                                                                                                                                                                                                                                                                                                                                                                                                                                                                                                                                                                                                                                                                                                                                                                                                                                                                                                                                                                                                                                                                                                                                                     |
|----------------------------------------------------------------------------------------------------------------|-----------------------------------------------------------------------------------------------------------------------------------------------------------------------------------------------------------------------------------------------------------------------------------------------------------------------------------------------------------------------------------------------------------------------------------------------------------------------------------------------------------------------------------------------------------------------------------------------------------------------------------------------------------------------------------------------------------------------------------------------------------------------------------------------------------------------------------------------------------------------------------------------------------------------------------------------------------------------------------------------------------------------------------------------------------------------------------------------------------------------------------------------------------------------------------------------------------------------------------------------------------------------------------------------------------------------------------------------------------------------------------------------------------------------------------------------------------------------------------------------------------------------------------------------------|
| 1<br>2<br>3<br>4<br>5<br>6<br>7<br>8<br>9<br>10<br>11                                                          | catona or catoplin or catopril or cesplon or cryopril or debax or dexacap or dextro captopril or ecapres or ecaten or epicordin or epsitron or farcopril or farmoten or hiperil or hypopress or hypotensor or insucar or iopril or isopresol or katopil or ketanine or keyerpril or lapril or locap or lopirin or lopril or medepres or midrat or minitent or nolectin or "oltens ge" or petacilon or praten or primace or rilcapton or ropril or smarten or tenofax or tensicap tensiomen or tensiomin or tensobon or tensoprel or tensoril or tenzib or topace or toprilem or typril-ace or vasosta or zapto or orkaptil or Cilazapril or dynorm or inhibace or inibace or initiss or inocar).tw.                                                                                                                                                                                                                                                                                                                                                                                                                                                                                                                                                                                                                                                                                                                                                                                                                                                 |
| 12<br>13<br>14<br>15<br>16<br>17<br>18<br>19<br>20<br>21<br>22<br>23<br>24<br>25<br>26<br>27<br>28             | (justor or vascece or Enalapril or Vasotec or bpnorm or dynacil or eliten or fosenopril or fosinil or fosinonorm or fosinopril or fosinorm or fosipres or fositen or fositens or fovas or fozitec or monopril or newace or sapril or sq28555 or staril or vasopril or acerbon or alapril or alfaken or carace or cipril or coric or dapril or fibsol or inopril or linopril or linvas or lipril or lisi abz orlisibeta or lisigamma or lisihexal or lisinopril dihydrate or lisipril or lisodur or lisopress or lisopril orlisoril or lispril or listril or lysinopril or "mk 0521" or "mk 521" or "mk 522" or "mk0521or mk521" or "mk522" or noperten or novatec or presiten or prinil or prinivil or qbrelis or sinopril or tensopril or tensyn or vivatec or zestomax or zestril or Monopri or Lisinopril or Prinivil or Zestril or Perindopril or Coversyl or Quinapril or Accupril or accuprin or accupro or accupron or acequin or acuitel or acuprel or acupril or asig or "ci906" or conan or ectren or korec or quinalapril or quinaten or quinazi or quinhexal or quinipril or Ramipril or acovil or altace or carasel or cardace or corpril or delix or "hoe 498" or hypren or hytren or lostapres or ramace or ramilich or triatec or tritace or unipril or vesdil or vivace or Altace or Trandolapril or Mavik or gopten or Odace or odric or udrik).tw.                                                                                                                                                                               |
| 29<br>30                                                                                                       | 39 Colistin/ or (Teicoplanin or Ivermectin or azithromycin).hw.                                                                                                                                                                                                                                                                                                                                                                                                                                                                                                                                                                                                                                                                                                                                                                                                                                                                                                                                                                                                                                                                                                                                                                                                                                                                                                                                                                                                                                                                                     |
| 31<br>32<br>33<br>34<br>35<br>36<br>37<br>38<br>39<br>40<br>41<br>42<br>43<br>44<br>45<br>46<br>47<br>48<br>49 | (Colistin or belcomycin or colimycin* or belcomycin or Colicort or colimycin or colistine or colomycin or coly mycin or colymycin or multimycin or polymyxin or Teicoplanin or planium or tagocid or talinac or tapocin or targocid or targoplanin or targosid or teichomycin or teichoplanin or teichoplanine or teicomid or teicopix or teiplamil or Planium or Tagocid or talinac or tapocin or targocid or targoplanin or targosid or teichomycin or teichomycin or teichoplanin* or teicomid or teicopix or teiplamil or Ivermectin or Avermectin or cardomec or diapec or efecti or epimekor or equalan or equalenor or ivermectina or ivermectol or ivexterm or ivomec or mectizan or "mk 933" or "mk933" or oramec or quanox or revectina or seguro or sklice or soolantra or stromectol or azithromycin or aruzilina or atizor or azadose or azasite or azatril or azenil or azibiot or azimin or azithral or azithromycin or azitrocin or azitromax azitromicin* or aziwok or azomyne or aztrin or azydrop or azyter or azithromycin or bazyt or "cp 62933" or "cp 62993" or "cp62933" or "cp62993" or erythromycin or Forcin or Inedol or infectoazit or "isv 401" or "isv401" or kromicin or macrozit or mezatrin or octavax or ordipha or ribotrex or sumamed or tobyl or tromix or trozocina or ultreon or vinzam or xithrone or "xz 450" or "xz450" or Zaret or Zarom or zetamax or zeto or zibramax or zifin or zimericina or zistic or zithromax or zithrox or zitinn or zitrim or zitrobifan or zitrocin or zitromax or zmax).tw. |
| 50<br>51<br>52                                                                                                 | 41 Tamoxifen.hw. or dasatinib/ or Epirubicin/ or Gemcitabine/ or Homoharringtonin/ or Imatinib/ or toremifene/ or Valrubicin/                                                                                                                                                                                                                                                                                                                                                                                                                                                                                                                                                                                                                                                                                                                                                                                                                                                                                                                                                                                                                                                                                                                                                                                                                                                                                                                                                                                                                       |
| 53<br>54<br>55<br>56                                                                                           | 42 (dasatinib or Ellence or Epirubicin* or epid or epifil or epiham or epilem or epirubicine or farmorrubicina or farmorubicin or pharmorubicin or Gemcitabine or difluorodeoxycytidine or Gemcite or gentro or gemzar or infugem or "ly188011" or Homoharringtonine or harringtonine                                                                                                                                                                                                                                                                                                                                                                                                                                                                                                                                                                                                                                                                                                                                                                                                                                                                                                                                                                                                                                                                                                                                                                                                                                                               |

## Comparative-effectiveness research of COVID-19 treatment: A rapid scoping review

|    |                                                                                                                                                                                                                                                                                                                                                                                                                                                                                                                                                                                                                                                                                                                                                                                                                                                                                                                                                                                                                                |
|----|--------------------------------------------------------------------------------------------------------------------------------------------------------------------------------------------------------------------------------------------------------------------------------------------------------------------------------------------------------------------------------------------------------------------------------------------------------------------------------------------------------------------------------------------------------------------------------------------------------------------------------------------------------------------------------------------------------------------------------------------------------------------------------------------------------------------------------------------------------------------------------------------------------------------------------------------------------------------------------------------------------------------------------|
|    | or omacetaxine or ceftalonin or omapro or synribo or Imatinib or "cgp 57148" or "cgp57148b" or gleevac or gleevec or glivec or glivic or ruvisc or Tamoxifen or ebefen or kessar or tamoplac or tamoxasta or tamoxifene or toremifene or estrimex or fareston or fc1157a or Valrubicin or valstar or valtaxin).tw.                                                                                                                                                                                                                                                                                                                                                                                                                                                                                                                                                                                                                                                                                                             |
| 43 | Disulfiram/ or Emetine/ or Clomipramine/ or Loperamide/ or Caspofungin/ or Terconazole/ or Colchicine/ or Promethazine/ or Azelastine/ or Aprepitant/ or Chlorpromazine/ or Icatibant/ or Bepotastine/ or prostacyclin/ or Vapreotide/ or Conivaptan/ or Nitric oxide/ or (Perphenazine or Metformin).hw.                                                                                                                                                                                                                                                                                                                                                                                                                                                                                                                                                                                                                                                                                                                      |
| 44 | (Disulfiram or antabus or Antabuse or esperal or disulfizam or Emetine or Emetin or Clomipramine or Anafranil or anafranilin or anafranyl or clomicalm or hydiphen or Loperamide or immodium or Caspofungin or Cancidas or Terconazole or fungistat or terazol or "r 42470or Colchicine" or colchysat or mitigare or "nsc 757" or Promethazine or allerfen or antiallersin or atosil or fenergan or hiberna or Phenergan or Pipolphen or Prothazine or Romergan or Sayomol or Azelastine or Astelin or "a5610 or afluon" or alerdual or alergodil or allergodrop or allergospray or allespray or allestin or astepro or azedil or azelamed or azelavision or azepe or azeptin or carelastin or corifina or "e 0659" or "e0659" or lasticom or lastin or lastinaz or loxin or oculastin or optivar or pollival or proallergodil or radethacin or radethazin or rhinolast or rinelaz or tebarat or visuzel or vividrin or vivispray or Aprepitant or cinvanti or emend or aprepitant or "1754030" or "mk 0869" or "ono7436").tw. |
| 45 | (Perphenazine or decentan or etaperazine or ethaperazine or "sch 3940" or thilatazin or tranquisan or trifalon or trilafan or trilafon or trilifan or triliphan or Chlorpromazine or hibernal or contomin or largactil or megaphen or neurazine or plegomazin or promacid or promapar or propaphenin or solidon or sonazine or taroctil or "thor prom" or thorazine or vegetamin or zuledin or Icatibant or firazyr or Metformin or diabetosan or diabex or dianben or diformin or fluamine or flumamine or fortamet or glifage or gliguanid or glucoformin or gluconil or glucophage or glucophage-mite or glucostop or glukophage or glumetza or haurymellin or meguan or merckformin or metforal or metformax or metiguanide or riomet or risidon or siofor or Bepotastine or bepreve or talion or Epoprostenol or prostacyclin or caripul or cycloprostin or epoprostenol or flolan or Vapreotide or docrised or octastatin or Conivaptan or vapisril or "Nitric oxide" or inomax or noxivent).tw.                         |
| 46 | (convalescence/ and plasma transfusion/) or (Convalesc* adj2 plasma).tw.                                                                                                                                                                                                                                                                                                                                                                                                                                                                                                                                                                                                                                                                                                                                                                                                                                                                                                                                                       |
| 47 | Natural killer cell/ or exp mesenchymal stem cell/                                                                                                                                                                                                                                                                                                                                                                                                                                                                                                                                                                                                                                                                                                                                                                                                                                                                                                                                                                             |
| 48 | ("Recombinant human ACE-2" or "APN0" or "Natural killer cell" or "natural killer cells" or "NK cell" or "NK cells" or mesenchymal).tw.                                                                                                                                                                                                                                                                                                                                                                                                                                                                                                                                                                                                                                                                                                                                                                                                                                                                                         |
| 49 | Arbidol/ or Galidesivir/                                                                                                                                                                                                                                                                                                                                                                                                                                                                                                                                                                                                                                                                                                                                                                                                                                                                                                                                                                                                       |
| 50 | (arbidol or Galidesivir or "immucillin A bcx4430" or "bcx 4430").tw.                                                                                                                                                                                                                                                                                                                                                                                                                                                                                                                                                                                                                                                                                                                                                                                                                                                                                                                                                           |
| 51 | n methyl dextro aspartic acid receptor blocking agent/                                                                                                                                                                                                                                                                                                                                                                                                                                                                                                                                                                                                                                                                                                                                                                                                                                                                                                                                                                         |
| 52 | ("n methyl dextro aspartic acid receptor" or "n methyl d aspartate a" or " NMDA antagonist*" or " NMDA inhibitor*" or " NMDA block*" or " NMDA receptor*").tw.                                                                                                                                                                                                                                                                                                                                                                                                                                                                                                                                                                                                                                                                                                                                                                                                                                                                 |

## Comparative-effectiveness research of COVID-19 treatment: A rapid scoping review

|    |                                                                                                                                                                                                                                                                                                                                    |
|----|------------------------------------------------------------------------------------------------------------------------------------------------------------------------------------------------------------------------------------------------------------------------------------------------------------------------------------|
| 53 | or/7-52                                                                                                                                                                                                                                                                                                                            |
| 54 | 6 and 53                                                                                                                                                                                                                                                                                                                           |
| 55 | exp experimental organism/ or animal tissue/ or animal cell/ or exp animal disease/ or exp carnivore disease/ or exp bird/ or exp experimental animal welfare/ or exp animal husbandry/ or animal behavior/ or exp animal cell culture/ or exp mammalian disease/ or exp mammal/ or exp marine species/ or nonhuman/ or animal.hw. |
| 56 | 55 not human/                                                                                                                                                                                                                                                                                                                      |
| 57 | 54 not 56                                                                                                                                                                                                                                                                                                                          |
| 58 | limit 57 to dd=20210131-20210518                                                                                                                                                                                                                                                                                                   |
| 59 | limit 58 to yr="2021"                                                                                                                                                                                                                                                                                                              |

Search run on July 9, 2021 using the Ovid platform, Embase database. Search was limited by date range, from January 31, 2021 to May 18, 2021, and run in database to update an existing search from May 01, 2020 to January 31, 2021.

### Appendix 3. List of drugs from Health Canada and Public Health Agency of Canada

| Categories                            | Drug names/descriptions                                                                                                                                                                                                                                                                                                                                                                                                                                                                                                                                                                                                                                                                                                                                                                                                                     |
|---------------------------------------|---------------------------------------------------------------------------------------------------------------------------------------------------------------------------------------------------------------------------------------------------------------------------------------------------------------------------------------------------------------------------------------------------------------------------------------------------------------------------------------------------------------------------------------------------------------------------------------------------------------------------------------------------------------------------------------------------------------------------------------------------------------------------------------------------------------------------------------------|
| ACE Inhibitors                        | <ul style="list-style-type: none"> <li>Benazepril (Lotensin), Captopril (Capoten), Cilazapril (Inhibace), Enalapril (Vasotec), Fosinopril (Monopril), Lisinopril (Prinivil, Zestril), Perindopril (Coversyl), Quinapril (Accupril), Ramipril (Altace), Trandolapril (Mavik)</li> </ul>                                                                                                                                                                                                                                                                                                                                                                                                                                                                                                                                                      |
| Angiotensin II Receptor Blocker (ARB) | <ul style="list-style-type: none"> <li>Azilsartan (Edarbi), candesartan (Atacand), eprosartan (Teveten), irbesartan (Avapro), telmisartan (Micardis), valsartan (Diovan, Prexxartan), losartan (Cozaar), olmesartan (Benicar), entresto (sacubitril/valsartan), byvalson (nebivolol/valsartan),</li> </ul>                                                                                                                                                                                                                                                                                                                                                                                                                                                                                                                                  |
| Antibiotics/antiparasitic             | <ul style="list-style-type: none"> <li>Suramin, Carriomycin, Suramin sodium, Colistin, Teicoplanin, Ivermectin, azithromycin</li> </ul>                                                                                                                                                                                                                                                                                                                                                                                                                                                                                                                                                                                                                                                                                                     |
| Antibodies                            | <ul style="list-style-type: none"> <li>SARS-Cov-2 specific neutralizing antibodies</li> <li>Bevicizumab, Ruxolitinib, Tocilizumab, Adalimumab, Camrelizumab, Eculizumab, Mepolizumab, "PD-1 mAb", Tocilizumab, tozumab, abciximab (Reopro), adalimumab (Humira/Amjevita), alefacept (Amevive), alemtuzumab (Campath), basiliximab (Simulect), belimumab (Benlysta), bezlotoxumab (Zinplava), canakinumab (Ilaris), certolizumab (Cimzia), cetuximab (Erbix), daclizumab (Zenapax/Zinbryta), denosumab (Prolia/Xgeva), efalizumab (Raptiva), golimumab (Simponi), inflectra (Remicade), ipilimumab (Yervoy), ixekizumab (Taltz), natalizumab (Tysabri), nivolumab (Opdivo), olaratumab (Lartruvo), omalizumab (Xolair), palivizumab (Synagis), panitumumab (Vectibix), pembrolizumab (Keytruda), rituximab (Rituxan), tocilizumab</li> </ul> |

## Comparative-effectiveness research of COVID-19 treatment: A rapid scoping review

|                             |                                                                                                                                                                                                                                                                                                                                                                                                                                                                                                                                                                                                                                                                                                                                                                                                                                                                                                                                                                                                                                                                                                                                                                                                                                                                                                                                                                             |
|-----------------------------|-----------------------------------------------------------------------------------------------------------------------------------------------------------------------------------------------------------------------------------------------------------------------------------------------------------------------------------------------------------------------------------------------------------------------------------------------------------------------------------------------------------------------------------------------------------------------------------------------------------------------------------------------------------------------------------------------------------------------------------------------------------------------------------------------------------------------------------------------------------------------------------------------------------------------------------------------------------------------------------------------------------------------------------------------------------------------------------------------------------------------------------------------------------------------------------------------------------------------------------------------------------------------------------------------------------------------------------------------------------------------------|
|                             | (Actemra/ RoActemra), trastuzumab (Herceptin), secukinumab (Cosentyx), ustekinumab (Stelara), Meplazumab                                                                                                                                                                                                                                                                                                                                                                                                                                                                                                                                                                                                                                                                                                                                                                                                                                                                                                                                                                                                                                                                                                                                                                                                                                                                    |
| Anticancer/chemotherapy     | • Dasatinib, Epirubicin, Gemcitabine hydrochloride, Homoharringtonine, Imatinib mesylate, Tamoxifen, Toremifene, Valrubicin                                                                                                                                                                                                                                                                                                                                                                                                                                                                                                                                                                                                                                                                                                                                                                                                                                                                                                                                                                                                                                                                                                                                                                                                                                                 |
| Anticoagulants              | • dalteparin, enoxaparin, tinzaparin, fondaparinux heparin, dabigatran, edoxaban, rivaroxaban, apixaban, warfarin, betrixaban, heparin, danaparoid                                                                                                                                                                                                                                                                                                                                                                                                                                                                                                                                                                                                                                                                                                                                                                                                                                                                                                                                                                                                                                                                                                                                                                                                                          |
| Antimalarials               | • Amodiaquine, Basoquin, Camoquin, Flavoquine, Chloroquine, Resochin, Dawaquin, Lariago, Aarlen, Hydroxychloroquine, Hydroxy-chloroquine, Plaquenil, Hydroquin, Axemal, Dolquine, Quensyl, Quinoric, Imiquimod, Aldara, Vyloma., Zyclara, Primaquine, Jasoprim, Malirid, Neo-Quipenyl, Pimaquin, Pmq, Primachina, Primacin, Primaquina, Primaquine, Primaquine, Remaquin, Tafenoquine, Krinfatel, Kozenis, Arakoda, Krintafel, Pamaquine, Plasmochin, Plasmoquine, Plsamaguine, Neo-Quipenyl, Primachin, Dihydroartemisinin, mefloquine, Nitazoxanide, Nitrothiazole                                                                                                                                                                                                                                                                                                                                                                                                                                                                                                                                                                                                                                                                                                                                                                                                        |
| Antiviral – Direct acting   | <ul style="list-style-type: none"> <li>• Protease inhibitors: boceprevir, telaprevir, lopinavir, ritonavir, lopinavir/ritonavir (Kaletra), darunavir/cobicistat (Prezcobix), indinavir (Crixivan), saquinavir (Invirase)</li> <li>• Integrase inhibitors: raltegravir, elvitegravir, dolutegravir</li> <li>• Entry (fusion) inhibitors: maraviroc (celsentri)</li> <li>• Nucleoside reverse transcriptase inhibitors: abacavir, ziagen, emtricitabine, emtriva, lamivudine, epivir, tenofovir (Viread), zidovudine, azidothymidine, retrovir</li> <li>• Nonnucleoside reverse transcriptase inhibitors : , doravirine, pifeltro, efavirenz, sustiva, etravirine, intelence, nevirapine, viramune, rilpivirine, edurant</li> <li>• Acyclic nucleoside phosphonate analogues: cidofovir diphosphates</li> <li>• Acyclic guanosine analogues: acyclovir</li> <li>• Pyrophosphate analogues: foscarnet, fomivirsen</li> <li>• Oligonucleotides</li> <li>• Nucleotide analog inhibitor: sofosbuvir</li> <li>• Nucleoside inhibitor: ribavirin (Ibavir)</li> <li>• Matrix 2 protein inhibitors: amantadine</li> <li>• RNA polymerase inhibitors: Rimantadine</li> <li>• Neuraminidase inhibitors: oseltamivir (Tamiflu), peramivir (Rapivab), zanamivir (Relenza)</li> <li>• Antiretrovirals: ASC09, Azvudine, Danoprevir, Darunavir, Lopinavir, ritonavir, Remdesivir</li> </ul> |
| Antiviral – Other           | • Baloxavir, marboxil, EIDD-2801                                                                                                                                                                                                                                                                                                                                                                                                                                                                                                                                                                                                                                                                                                                                                                                                                                                                                                                                                                                                                                                                                                                                                                                                                                                                                                                                            |
| Antivirals – Broad spectrum | • Favipiravir, Triazavirin, Umifenovir (arbidol hydrochloride), Galidesivir                                                                                                                                                                                                                                                                                                                                                                                                                                                                                                                                                                                                                                                                                                                                                                                                                                                                                                                                                                                                                                                                                                                                                                                                                                                                                                 |



## Comparative-effectiveness research of COVID-19 treatment: A rapid scoping review

|                                                           |                                                                                                                                                                                                                                                                                                                                                                                                                                                                                                                                                                                                                                                                                                                                                                                                                                                                                                                                                                                                                                                                                                                                                  |
|-----------------------------------------------------------|--------------------------------------------------------------------------------------------------------------------------------------------------------------------------------------------------------------------------------------------------------------------------------------------------------------------------------------------------------------------------------------------------------------------------------------------------------------------------------------------------------------------------------------------------------------------------------------------------------------------------------------------------------------------------------------------------------------------------------------------------------------------------------------------------------------------------------------------------------------------------------------------------------------------------------------------------------------------------------------------------------------------------------------------------------------------------------------------------------------------------------------------------|
| Immune support/modulating                                 | <ul style="list-style-type: none"> <li>• Convalescent plasma</li> <li>• Recombinant human ACE-2: APN01</li> <li>• Natural killer (NK) cells</li> <li>• Mesenchymal stem cells</li> <li>• Interferons: Interferon-alpha, Interferon-beta, Interferon-gamma, interferon <math>\beta</math> – 1b (Betaseron/Extavia), interferon beta – 1a (Rebif)</li> <li>• Intravenous Immunoglobulin: Flebogamma DIF; Gamunex; Globulin-N; Globulin N; Intraglobin; Intraglobin F, Gammagard; Gamimmune; Gamimmune, Privigen; Sandoglobulin; Venoglobulin; Venoglobulin-I; Venoglobulin I; Venimmune; Iveegam; Alphaglobin; Endobulin; Gamimmune N; Gamimmune N; Gammonativ</li> </ul>                                                                                                                                                                                                                                                                                                                                                                                                                                                                          |
| Interleukin Inhibitors                                    | <ul style="list-style-type: none"> <li>• Interleukin (IL)-1 Inhibitor: Anakinra</li> <li>• Interleukin (IL)-6 Inhibitors: Sarilumab (Kevzara); Siltuximab</li> <li>• Anti-Tumor necrosis factor-alpha (anti-TNF-alpha)</li> <li>• Anti-Granulocyte-macrophage colony-stimulating factor (anti-GM-CSF)</li> </ul>                                                                                                                                                                                                                                                                                                                                                                                                                                                                                                                                                                                                                                                                                                                                                                                                                                 |
| Kinase Inhibitors                                         | <ul style="list-style-type: none"> <li>• Baricitinib, Acalabrutinib (Calquence), Fedratinib, Ruxolitinib, Jakotinib, Ruxolitinib, Sunitinib, Erlotinib</li> </ul>                                                                                                                                                                                                                                                                                                                                                                                                                                                                                                                                                                                                                                                                                                                                                                                                                                                                                                                                                                                |
| Nonspecific anti-inflammatory and immunosuppressive drugs | <ul style="list-style-type: none"> <li>• Fingolimod Hydrochloride, Leflunomide, Thalidomide, Methylprednisone, Prednisolone, Fluprednisolone, Corticosteroids, Cyclosporin A, Glycyrrhizic Acid/Glycyrrhizic</li> </ul>                                                                                                                                                                                                                                                                                                                                                                                                                                                                                                                                                                                                                                                                                                                                                                                                                                                                                                                          |
| Other                                                     | <ul style="list-style-type: none"> <li>• Disulfiram (acetaldehyde dehydrogenase inhibitor), Emetine (alkaloid emetic), Clomipramine (antidepressant), Loperamide (antidiarrheal), Caspofungin (antifungal), Terconazole (antifungal), Colchicine (anti-gout agent), Promethazine hydrochloride (antihistamine), Azelastine (antihistamine), Aprepitant (anti-nausea/antiemetic), Perphenazine (antipsychotic), Chlorpromazine hydrochloride (antipsychotic), Icatibant (Bradykinin B2 Receptor Antagonists), Metformin (diabetes), Bepotastine (histamine 1 antagonist), Epoprostenol (prostaglandin), Vapreotide (somatostatin), Conivaptan (vasopressin inhibitor), Nitric oxide (vasodilator), Acetylcysteine (prodrug), Potassium citrate (alkalinizer), Dipyridamole (vasodilator), Hydrogen peroxide, Cobicistat (Tybost), Bromhexine (mucolytic), Ebastine (H1 receptor agonist), Pirfenidone (antifibrotic), Polyinosinic-polycytidylic (Poly I-C), rhG-CSF, Thymosin, Tranilast, Ascorbic Acid, Aviptadil (neuropeptide), Ifendopril (NMDA inhibitor), fenretinide (synthetic retinoid), famotidine (H2 receptor antagonist)</li> </ul> |

### Appendix 4. List of included primary studies

1. Abaleke E, Abbas M, Abbasi S, Abbott A, Abdelaziz A, Abdelbadiee S, et al. Azithromycin in patients admitted to hospital with COVID-19 (RECOVERY): a randomised, controlled, open-label, platform trial. *The Lancet*. 2021;397(10274):605-12.
2. Abbaspour Kasgari H, Moradi S, Shabani AM, Babamahmoodi F, Davoudi Badabi AR, Davoudi L, et al. Evaluation of the efficacy of sofosbuvir plus daclatasvir in combination with ribavirin for

## Comparative-effectiveness research of COVID-19 treatment: A rapid scoping review

hospitalized COVID-19 patients with moderate disease compared with standard care: a single-centre, randomized controlled trial. *Journal of Antimicrobial Chemotherapy*. 2020;75(11):3373-8.

3. Abd-Elsalam S, Esmail ES, Khalaf M, Abdo EF, Medhat MA, Abd El Ghafar MS, et al. Hydroxychloroquine in the treatment of COVID-19: a multicenter randomized controlled study. *The American Journal of Tropical Medicine and Hygiene*. 2020;103(4):1635.
4. Abdulrahman A, AlSayed I, AlMadhi M, AlArayedh J, Mohamed SJ, Sharif AK, et al. The efficacy and safety of hydroxychloroquine in COVID19 patients: a multicenter national retrospective cohort. *medRxiv*. 2020.
5. Abolghasemi H, Eshghi P, Cheraghali AM, Fooladi AAI, Moghaddam FB, Imanizadeh S, et al. Clinical efficacy of convalescent plasma for treatment of COVID-19 infections: Results of a multicenter clinical study. *Transfusion and Apheresis Science*. 2020;59(5):102875.
6. Abuzakouk M, Saleh K, Algora M, Nusair A, Alameri J, Alshehhi F, et al. Convalescent Plasma Efficacy in Life-Threatening COVID-19 Patients Admitted to the ICU: A Retrospective Cohort Study. *Journal of clinical medicine*. 2021;10(10):2113.
7. Agarwal A, Mukherjee A, Kumar G, Chatterjee P, Bhatnagar T, Malhotra P, et al. Page Convalescent plasma in the management of moderate COVID-19 in India: An open-label parallel-arm phase II multicentre randomized controlled trial (PLACID Trial).
8. Agusti A, Guillen E, Ayora A, Anton A, Aguilera C, Vidal X, et al. Efficacy and safety of hydroxychloroquine in healthcare professionals with mild SARS-CoV-2 infection: Prospective, non-randomized trial. *Enfermedades Infecciosas Y Microbiología ClíNica*. 2020.
9. ah Yoon H, Bartash R, Gendlina I, Rivera J, Nakouzi A, Bortz Iii RH, et al. Treatment of severe COVID-19 with convalescent plasma in Bronx, NYC. *JCI insight*. 2021;6(4).
10. Ahmed S, Karim MM, Ross AG, Hossain MS, Clemens JD, Sumiya MK, et al. A five-day course of ivermectin for the treatment of COVID-19 may reduce the duration of illness. *International Journal of Infectious Diseases*. 2021;103:214-6.
11. Alam MM, Mahmud S, Aggarwal S, Fathma S, Al Mahi N, Shibli MS, et al. Clinical Impact of the Early Use of Monoclonal Antibody LY-CoV555 (Bamlanivimab) on Mortality and Hospitalization Among Elderly Nursing Home Patients: A Multicenter Retrospective Study. *Cureus*. 2021;13(5).
12. Albani F, Fusina F, Giovannini A, Ferretti P, Granato A, Prezioso C, et al. Impact of azithromycin and/or hydroxychloroquine on hospital mortality in COVID-19. *Journal of clinical medicine*. 2020;9(9):2800.
13. Albani F, Fusina F, Granato E, Capotosto C, Ceracchi C, Gargaruti R, et al. Corticosteroid treatment has no effect on hospital mortality in COVID-19 patients. *Scientific reports*. 2021;11(1):1-6.
14. Albani F, Sepe L, Fusina F, Prezioso C, Baronio M, Caminiti F, et al. Thromboprophylaxis with enoxaparin is associated with a lower death rate in patients hospitalized with SARS-CoV-2 infection. A cohort study. *EClinicalMedicine*. 2020;27:100562.
15. Albertini L, Soletchnik M, Razurel A, Cohen J, Bidegain F, Fauvelle F, et al. Observational study on off-label use of tocilizumab in patients with severe COVID-19. *European Journal of Hospital Pharmacy*. 2021;28(1):22-7.

**Comparative-effectiveness research of COVID-19 treatment: A rapid scoping review**

16. Allahyari A, Seddigh-Shamsi M, Mahmoudi M, Jamehdar SA, Amini M, Mozdourian M, et al. Efficacy and safety of convalescent plasma therapy in severe COVID-19 patients with acute respiratory distress syndrome. *International Immunopharmacology*. 2021;93:107239.
17. Almas T, Ehtesham M, Khan AW, Khedro T, Hussain S, Kaneez M, et al. Safety and efficacy of low-dose corticosteroids in patients with non-severe Coronavirus disease 2019: A retrospective cohort study. *Cureus*. 2021;13(1).
18. Almazrou SH, Almalki ZS, Alanazi AS, Alqahtani AM, Alghamd SM. Comparing the impact of Hydroxychloroquine based regimens and standard treatment on COVID-19 patient outcomes: A retrospective cohort study. *Saudi Pharmaceutical Journal*. 2020;28(12):1877-82.
19. AlQahtani M, Abdulrahman A, Almadani A, Alali SY, Al Zamrooni AM, Hejab AH, et al. Randomized controlled trial of convalescent plasma therapy against standard therapy in patients with severe COVID-19 disease. *Scientific reports*. 2021;11(1):1-8.
20. AlQahtani M, Abdulrahman A, Almadani A, Alali SY, Al Zamrooni AM, Hejab AH, et al. Randomized controlled trial of convalescent plasma therapy against standard therapy in patients with severe COVID-19 disease. *Scientific reports*. 2021;11(1):1-8.
21. Alsharidah S, Ayed M, Ameen RM, Alhuraish F, Rouheldeen NA, Alshammari FR, et al. COVID-19 convalescent plasma treatment of moderate and severe cases of SARS-CoV-2 infection: a multicenter interventional study. *International Journal of Infectious Diseases*. 2021;103:439-46.
22. AlShehry N, Zaidi SZA, AlAskar A, Al Odayani A, Alotaibi JM, AlSagheir A, et al. Safety and efficacy of convalescent plasma for severe COVID-19: interim report of a multicenter phase II study from Saudi Arabia. *Saudi Journal of Medicine & Medical Sciences*. 2021;9(1):16.
23. AlShehry N, Zaidi SZA, AlAskar A, Al Odayani A, Alotaibi JM, AlSagheir A, et al. Safety and efficacy of convalescent plasma for severe COVID-19: interim report of a multicenter phase II study from Saudi Arabia. *Saudi Journal of Medicine & Medical Sciences*. 2021;9(1):16.
24. Altuntas F, Ata N, Yigenoglu TN, Basci S, Dal MS, Korkmaz S, et al. Convalescent plasma therapy in patients with COVID-19. *Transfusion and Apheresis Science*. 2021;60(1):102955.
25. Alvarez-Mon M, Asúnolo Á, Sanz J, Munoz B, Arranz-Caso JA, Novella Mena M, et al. Tocilizumab efficacy in COVID-19 patients is associated with respiratory severity-based stages. 2021.
26. Ammar M, Gu S, Jiang W, Zhao H, Ammar A, Johnson J, et al. 9: Evaluation of Aerosolized Epoprostenol in COVID-19 ARDS Patients. *Critical Care Medicine*. 2021;49(1):5.
27. An MH, Kim MS, Kim B-O, Kang SH, Kimn WJ, Park SK, et al. Treatment response to hydroxychloroquine and antibiotics for mild to moderate COVID-19: a retrospective cohort study from South Korea. *medRxiv*. 2020.
28. Angus DC, Derde L, Al-Beidh F, Annane D, Arabi Y, Beane A, et al. Effect of hydrocortisone on mortality and organ support in patients with severe COVID-19: the REMAP-CAP COVID-19 corticosteroid domain randomized clinical trial. *Jama*. 2020;324(13):1317-29.
29. Annane D, Heming N, Grimaldi-Bensouda L, Frémeaux-Bacchi V, Vigan M, Roux A-L, et al. Eculizumab as an emergency treatment for adult patients with severe COVID-19 in the intensive care unit: a proof-of-concept study. *EClinicalMedicine*. 2020;28:100590.

**Comparative-effectiveness research of COVID-19 treatment: A rapid scoping review**

30. Annie FH, Sirbu C, Frazier KR, Broce M, Lucas Jr BD. Hydroxychloroquine in Hospitalized Patients with COVID- 19: Real- World Experience Assessing Mortality. *Pharmacotherapy: The Journal of Human Pharmacology and Drug Therapy*. 2020;40(11):1072-81.
31. Annweiler C, Hanotte B, de l'Éprevier CG, Sabatier J-M, Lafaie L, Célariet T. Vitamin D and survival in COVID-19 patients: a quasi-experimental study. *The Journal of steroid biochemistry and molecular biology*. 2020;204:105771.
32. Antonov V, Ignatova G, Pribytkova O, Sleptsova S, Strebkova E, Khudyakova E, et al. Experience of olokizumab use in COVID-19 patients. *Terapevticheskii arkhiv*. 2020;92(12):148-54.
33. Anwar F, Kuriakose B, Khadija S, Hamad M, Satiregun M, Ali L, et al. 219: Mechanically Ventilated Patients With SARS-CoV-2 Infection: A Single-Institution Analysis. *Critical Care Medicine*. 2021;49(1):95.
34. Aomar-Millán IF, Salvatierra J, Torres-Parejo Ú, Faro-Miguez N, Callejas-Rubio JL, Ceballos-Torres Á, et al. Anakinra after treatment with corticosteroids alone or with tocilizumab in patients with severe COVID-19 pneumonia and moderate hyperinflammation. A retrospective cohort study. *Internal and emergency medicine*. 2021;16(4):843-52.
35. Aomar-Millán IF, Salvatierra J, Torres-Parejo Ú, Nuñez-Nuñez M, Hernández-Quero J, Anguita-Santos F. Glucocorticoids alone versus tocilizumab alone or glucocorticoids plus tocilizumab in patients with severe SARS-CoV-2 pneumonia and mild inflammation. *Medicina Clínica (English Edition)*. 2021.
36. Arshad S, Kilgore P, Chaudhry ZS, Jacobsen G, Wang DD, Huitsing K, et al. Treatment with hydroxychloroquine, azithromycin, and combination in patients hospitalized with COVID-19. *International journal of infectious diseases*. 2020;97:396-403.
37. Arslan Y, Yilmaz G, Dogan D, Hasirci M, Cetindogan H, Ocal N, et al. The effectiveness of early anticoagulant treatment in Covid-19 patients. *Phlebology*. 2021;36(5):384-91.
38. Avendano-Sola C, Ramos-Martinez A, Munez-Rubio E, Ruiz-Antoran B, de Molina RM, Torres F, et al. Convalescent plasma for COVID-19: a multicenter, randomized clinical trial. *MedRxiv*. 2020.
39. Awasthi S, Wagner T, Venkatakrisnan A, Puranik A, Hurchik M, Agarwal V, et al. Plasma IL-6 levels following corticosteroid therapy as an indicator of ICU length of stay in critically ill COVID-19 patients. *Cell death discovery*. 2021;7(1):1-15.
40. Azmy V, Kaman K, Tang D, Zhao H, Cruz CD, Topal JE, et al. Cytokine Profiles Before and After Immune Modulation in Hospitalized Patients with COVID-19. *Journal of clinical immunology*. 2021;41(4):738-47.
41. Babalola OE, Bode CO, Ajayi AA, Alakaloko FM, Akase IE, Otrofanowei E, et al. Ivermectin shows clinical benefits in mild to moderate Covid19 disease: A randomised controlled double blind dose response study in Lagos. *medRxiv*. 2021.
42. Baghaei P, Dastan F, Marjani M, Moniri A, Abtahian Z, Ghadimi S, et al. Combination therapy of IFNβ1 with lopinavir–ritonavir, increases oxygenation, survival and discharging of sever COVID-19 infected inpatients. *International Immunopharmacology*. 2021;92:107329.
43. Bahl A, Johnson S, Chen N-W. Timing of corticosteroids impacts mortality in hospitalized COVID-19 patients. *Internal and emergency medicine*. 2021:1-11.

**Comparative-effectiveness research of COVID-19 treatment: A rapid scoping review**

- 1  
2  
3 44. Bajpai M, Maheshwari A, Chabra K, Kale P, Gupta A, Gupta E, et al. Efficacy of convalescent  
4 plasma therapy compared to fresh frozen plasma in severely ill COVID-19 patients: A pilot randomized  
5 controlled trial. medRxiv. 2020.  
6
- 7 45. Balcells ME, Rojas L, Le Corre N, Martínez-Valdebenito C, Ceballos ME, Ferrés M, et al. Early  
8 anti-SARS-CoV-2 convalescent plasma in patients admitted for COVID-19: a randomized phase II  
9 clinical trial. medRxiv. 2020.  
10
- 11 46. Balcells ME, Rojas L, Le Corre N, Martínez-Valdebenito C, Ceballos ME, Ferrés M, et al. Early  
12 versus deferred anti-SARS-CoV-2 convalescent plasma in patients admitted for COVID-19: A  
13 randomized phase II clinical trial. PLoS medicine. 2021;18(3):e1003415.  
14
- 15 47. Balkhair A, Al-Zakwani I, Al Busaidi M, Al-Khribash A, Al Mubaihsi S, BaTaher H, et al.  
16 Anakinra in hospitalized patients with severe COVID-19 pneumonia requiring oxygen therapy: results of  
17 a prospective, open-label, interventional study. International Journal of Infectious Diseases.  
18 2021;103:288-96.  
19
- 20 48. Bandopadhyay P, D'Rozario R, Lahiri A, Sarif J, Ray Y, Paul SR, et al. Nature and Dimensions  
21 of Systemic Hyperinflammation and its Attenuation by Convalescent Plasma in Severe COVID-19. The  
22 Journal of infectious diseases. 2021;224(4):565-74.  
23
- 24 49. Bani-Sadr F, Hentzien M, Pascard M, N'Guyen Y, Servettaz A, Andreoletti L, et al.  
25 Corticosteroid therapy for patients with COVID-19 pneumonia: a before–after study. International Journal  
26 of Antimicrobial Agents. 2020;56(2):106077.  
27
- 28 50. Batirel A, Demirhan R, Eser N, Körlü E, Tezcan ME. Pulse steroid treatment for hospitalized  
29 adults with COVID-19. Turkish journal of medical sciences. 2021;51(5):2248-55.  
30
- 31 51. Beiel J, Tomashek K, Dodd L, Mehta A, Zingman B, Kalil A, et al. Remdesivir for the Treatment  
32 of COVID-19—Final Report. N Engl J Med. 2020;383:1813-26.  
33
- 34 52. Bernaola N, Mena R, Bernaola A, Carballo C, Lara A, Bielza C, et al. Observational study of the  
35 efficiency of treatments in patients hospitalized with Covid-19 in Madrid. medRxiv. 2020.  
36
- 37 53. Bernardini A, Ciconte G, Negro G, Rondine R, Mecarocci V, Viva T, et al. Assessing QT interval  
38 in COVID-19 patients: safety of hydroxychloroquine-azithromycin combination regimen. International  
39 Journal of Cardiology. 2021;324:242-8.  
40
- 41 54. Bhandari S, Rankawat G, Singh A. Tocilizumab: An Effective Therapy for Severely and  
42 Critically Ill COVID-19 Patients. Indian Journal of Critical Care Medicine: Peer-reviewed, Official  
43 Publication of Indian Society of Critical Care Medicine. 2021;25(3):260.  
44
- 45 55. Bian H, Zheng Z-H, Wei D, Zhang Z, Kang W-Z, Hao C-Q, et al. Meplazumab treats COVID-19  
46 pneumonia: an open-labelled, concurrent controlled add-on clinical trial. MedRxiv. 2020.  
47
- 48 56. Bihariesingh R, Bansie R, Froberg J, Ramdhani N, Mangroo R, Bustamente D, et al. Mortality  
49 reduction in ICU-admitted COVID-19 patients in Suriname after treatment with convalescent plasma  
50 acquired via gravity filtration. medRxiv. 2021.  
51
- 52 57. Billett HH, Reyes-Gil M, Szymanski J, Ikemura K, Stahl LR, Lo Y, et al. Anticoagulation in  
53 COVID-19: effect of enoxaparin, heparin, and apixaban on mortality. Thrombosis and haemostasis.  
54 2020;120(12):1691-9.  
55  
56  
57  
58  
59

## Comparative-effectiveness research of COVID-19 treatment: A rapid scoping review

- 1  
2  
3 58. Bodro M, Cofan F, Ríos J, Herrera S, Linares L, Marcos MA, et al. Use of Anti-Cytokine  
4 Therapy in Kidney Transplant Recipients with COVID-19. *Journal of clinical medicine*. 2021;10(8):1551.  
5
- 6 59. Bukhari SKHS, Asghar A, Perveen N, Hayat A, Mangat SA, Butt KR, et al. Efficacy of  
7 Ivermectin in COVID-19 Patients with Mild to Moderate Disease. *medRxiv*. 2021.  
8
- 9 60. Burdick H, Lam C, Mataraso S, Siefkas A, Braden G, Dellinger RP, et al. Is Machine Learning a  
10 Better Way to Identify COVID-19 Patients Who Might Benefit from Hydroxychloroquine Treatment?—  
11 The IDENTIFY Trial. *Journal of Clinical Medicine*. 2020;9(12):3834.  
12
- 13 61. Butler CC, Dorward J, Yu L-M, Gbinigie O, Hayward G, Saville BR, et al. Azithromycin for  
14 community treatment of suspected COVID-19 in people at increased risk of an adverse clinical course in  
15 the UK (PRINCIPLE): a randomised, controlled, open-label, adaptive platform trial. *The Lancet*.  
16 2021;397(10279):1063-74.  
17
- 18 62. Byttebier G, Belmans L, Alexander M, Saxberg BE, De Spiegeleer B, De Spiegeleer A, et al.  
19 Hospital mortality in COVID-19 patients in Belgium treated with statins, ACE inhibitors and/or ARBs.  
20 *Human Vaccines & Immunotherapeutics*. 2021:1-10.  
21
- 22 63. Cadegiani FA, McCoy J, Wambier CG, Goren A. 5-Alpha-Reductase Inhibitors Reduce  
23 Remission Time of COVID-19: Results From a Randomized Double Blind Placebo Controlled  
24 Interventional Trial in 130 SARS-CoV-2 Positive Men. *medRxiv*. 2020.  
25
- 26 64. Cadegiani FA, McCoy J, Wambier CG, Vaño-Galván S, Shapiro J, Tosti A, et al. Proxalutamide  
27 significantly accelerates viral clearance and reduces time to clinical remission in patients with mild to  
28 moderate COVID-19: Results from a randomized, double-blinded, placebo-controlled trial. *Cureus*.  
29 2021;13(2).  
30
- 31 65. Caracciolo M, Correale P, Mangano C, Foti G, Falcone C, Macheda S, et al. Efficacy and Effect  
32 of Inhaled Adenosine Treatment in Hospitalized COVID-19 Patients. *Frontiers in immunology*.  
33 2021;12:734.  
34
- 35 66. Carallo C, Pugliese F, Vettorato E, Tripolino C, Delle Donne L, Guarrera G, et al. Higher heparin  
36 dosages reduce thromboembolic complications in patients with COVID-19 pneumonia. *Journal of*  
37 *Investigative Medicine*. 2021;69(4):884-7.  
38
- 39 67. Cardillo G, Viggiano GV, Russo V, Mangiacapra S, Cavalli A, Castaldo G, et al. Antithrombotic  
40 and Anti-Inflammatory Effects of Fondaparinux and Enoxaparin in Hospitalized COVID-19 Patients: The  
41 FONDENOXAVID Study. *Journal of blood medicine*. 2021;12:69.  
42
- 43 68. Carvalho V, Turon R, Goncalves B, Ceotto V, Kurtz P, Righy C. Effects of tocilizumab in  
44 critically ill patients with COVID-19: a quasi-experimental study. *medRxiv*. 2020.  
45
- 46 69. Cegolon L, Einollahi B, Imanizadeh S, Rezapour M, Javanbakht M, Nikpouraghdam M, et al. On  
47 whether therapeutic plasma exchange is an effective cure for severe/critical COVID-19 pneumonia.  
48 *medRxiv*. 2021.  
49
- 50 70. Chahla RE, Ruiz LM, Mena T, Brepe Y, Terranova P, Ortega ES, et al. IVERMECTIN  
51 REPROPOSING FOR COVID-19 TREATMENT OUTPATIENTS IN MILD STAGE IN PRIMARY  
52 HEALTH CARE CENTERS. *medRxiv*. 2021.  
53  
54  
55  
56  
57  
58  
59

**Comparative-effectiveness research of COVID-19 treatment: A rapid scoping review**

71. Chang D, Saleh M, Gabriels J, Ismail H, Goldner B, Willner J, et al. Inpatient use of ambulatory telemetry monitors for COVID-19 patients treated with hydroxychloroquine and/or azithromycin. *Journal of the American College of Cardiology*. 2020;75(23):2992-3.
72. Chen C, Huang J, Cheng Z, Wu J, Chen S, Zhang Y, et al. Favipiravir versus arbidol for COVID-19: a randomized clinical trial. *MedRxiv*. 2020.
73. Chen C-P, Lin Y-C, Chen T-C, Tseng T-Y, Wong H-L, Kuo C-Y, et al. A multicenter, randomized, open-label, controlled trial to evaluate the efficacy and tolerability of hydroxychloroquine and a retrospective study in adult patients with mild to moderate coronavirus disease 2019 (COVID-19). *PloS one*. 2020;15(12):e0242763.
74. Chen J, Liu D, Liu L, Liu P, Xu Q, Xia L, et al. A pilot study of hydroxychloroquine in treatment of patients with moderate COVID-19. *Journal of Zhejiang University (Medical Science)*. 2020;49(2):215-9.
75. Chen J, Xia L, Liu L, Xu Q, Ling Y, Huang D, et al., editors. Antiviral activity and safety of darunavir/cobicistat for the treatment of COVID-19. *Open forum infectious diseases*; 2020: Oxford University Press US.
76. Chen L, Zhang Z-y, Fu J-g, Feng Z-p, Zhang S-Z, Han Q-Y, et al. Efficacy and safety of chloroquine or hydroxychloroquine in moderate type of COVID-19: a prospective open-label randomized controlled study. *MedRxiv*. 2020.
77. Chen P, Nirula A, Heller B, Gottlieb RL, Boscia J, Morris J, et al. SARS-CoV-2 neutralizing antibody LY-CoV555 in outpatients with Covid-19. *New England Journal of Medicine*. 2021;384(3):229-37.
78. Chen Q, Song Y, Wang L, Zhang Y, Han L, Liu J, et al. Corticosteroids treatment in severe patients with COVID-19: a propensity score matching study. *Expert review of respiratory medicine*. 2021;15(4):543-52.
79. Chen W, Yao M, Fang Z, Lv X, Deng M, Wu Z. A study on clinical effect of Arbidol combined with adjuvant therapy on COVID- 19. *Journal of medical virology*. 2020;92(11):2702-8.
80. Chen Z, Hu J, Zhang Z, Jiang S, Han S, Yan D, et al. Efficacy of hydroxychloroquine in patients with COVID-19: results of a randomized clinical trial. *medrxiv*. 2020.
81. Chow JH, Khanna AK, Kethireddy S, Yamane D, Levine A, Jackson AM, et al. Aspirin use is associated with decreased mechanical ventilation, intensive care unit admission, and in-hospital mortality in hospitalized patients with coronavirus disease 2019. *Anesthesia & Analgesia*. 2021;132(4):930-41.
82. Chroboczek T, Lacoste M, Wackenheim C, Challan-Belval T, Amar B, Boisson T, et al. Beneficial effect of corticosteroids in severe COVID-19 pneumonia: a propensity score matching analysis. *MedRxiv*. 2020.
83. Consortium WST. Repurposed antiviral drugs for COVID-19—interim WHO SOLIDARITY trial results. *New England journal of medicine*. 2021;384(6):497-511.
84. Consortium WST. Repurposed antiviral drugs for COVID-19—interim WHO SOLIDARITY trial results. *New England journal of medicine*. 2021;384(6):497-511.

## Comparative-effectiveness research of COVID-19 treatment: A rapid scoping review

85. Corral L, Bahamonde A, delas Revillas FA, Gomez-Barquero J, Abadia-Otero J, Garcia-Ibarbia C, et al. GLUCOCOVID: A controlled trial of methylprednisolone in adults hospitalized with COVID-19 pneumonia. *MedRxiv*. 2020.
86. Courcelle R, Gaudry S, Serck N, Blonz G, Lascarrou J-B, Grimaldi D. Neuromuscular blocking agents (NMBA) for COVID-19 acute respiratory distress syndrome: a multicenter observational study. *Critical Care*. 2020;24(1):1-4.
87. Cremer PC, Abbate A, Hudock K, McWilliams C, Mehta J, Chang SY, et al. Mavrilimumab in patients with severe COVID-19 pneumonia and systemic hyperinflammation (MASH-COVID): an investigator initiated, multicentre, double-blind, randomised, placebo-controlled trial. *The Lancet Rheumatology*. 2021.
88. Cruz LR, Baladrón I, Rittoles A, Díaz PA, Valenzuela C, Santana R, et al. Treatment with an Anti-CK2 Synthetic Peptide Improves Clinical Response in Covid-19 Patients with Pneumonia. A Randomized and Controlled Clinical Trial. *ACS pharmacology & translational science*. 2020;4(1):206-12.
89. Dabbous HM, El-Sayed MH, El Assal G, Elghazaly H, Ebeid FF, Sherief AF, et al. Safety and efficacy of favipiravir versus hydroxychloroquine in management of COVID-19: A randomised controlled trial. *Scientific reports*. 2021;11(1):1-7.
90. de la Calle C, López-Medrano F, Pablos JL, Lora-Tamayo J, Maestro-de la Calle G, Sánchez-Fernández M, et al. Effectiveness of anakinra for tocilizumab-refractory severe COVID-19: A single-centre retrospective comparative study. *International Journal of Infectious Diseases*. 2021;105:319-25.
91. De Luca G, Cavalli G, Campochiaro C, Della Torre E, Angelillo P, Tomelleri A, et al. CO0001 MAVRILIMUMAB IMPROVES OUTCOMES IN SEVERE COVID-19 PNEUMONIA AND SYSTEMIC HYPER-INFLAMMATION. *BMJ Publishing Group Ltd*; 2020.
92. De Rossi N, Scarpazza C, Filippini C, Cordioli C, Rasia S, Mancinelli CR, et al. Early use of low dose tocilizumab in patients with COVID-19: A retrospective cohort study with a complete follow-up. *EClinicalMedicine*. 2020;25:100459.
93. Devereux SG, Giannopoulos G, Vrachatis DA, Siasos GD, Giotaki SG, Gargalianos P, et al. Effect of colchicine vs standard care on cardiac and inflammatory biomarkers and clinical outcomes in patients hospitalized with coronavirus disease 2019: the GRECCO-19 randomized clinical trial. *JAMA network open*. 2020;3(6):e2013136-e.
94. Della-Torre E, Lanzillotta M, Campochiaro C, Cavalli G, De Luca G, Tomelleri A, et al. Respiratory Impairment Predicts Response to IL-1 and IL-6 Blockade in COVID-19 Patients With Severe Pneumonia and Hyper-Inflammation. *Frontiers in Immunology*. 2021;12:1564.
95. Di Castelnuovo A, Costanzo S, Antinori A, Berselli N, Blandi L, Bruno R, et al. Use of hydroxychloroquine in hospitalised COVID-19 patients is associated with reduced mortality: Findings from the observational multicentre Italian CORIST study. *European journal of internal medicine*. 2020;82:38-47.
96. Diaz RM, García MAA, Muñoz FJT, Perez LES, Gonzalez MM, Bermejo JAM, et al. Does timing matter on tocilizumab administration? Clinical, analytical and radiological outcomes in COVID-19. *European Journal of Hospital Pharmacy*. 2021.



**Comparative-effectiveness research of COVID-19 treatment: A rapid scoping review**

97. Diaz RM, García MAA, Muñoz FJT, Perez LES, Gonzalez MM, Bermejo JAM, et al. Does timing matter on tocilizumab administration? Clinical, analytical and radiological outcomes in COVID-19. *European Journal of Hospital Pharmacy*. 2021.
98. Duarte M, Pelorosso F, Nicolosi LN, Salgado MV, Vetulli H, Aquieri A, et al. Telmisartan for treatment of Covid-19 patients: An open multicenter randomized clinical trial. *EClinicalMedicine*. 2021;37:100962.
99. Dubee V, Roy P-M, Vielle B, Parot-Schinkel E, Blanchet O, Darsonval A, et al. A placebo-controlled double blind trial of hydroxychloroquine in mild-to-moderate COVID-19. *medRxiv*. 2020.
100. Dupuis C, de Montmollin E, Buetti N, Goldgran-Toledano D, Reignier J, Schwebel C, et al. Impact of early corticosteroids on 60-day mortality in critically ill patients with COVID-19: A multicenter cohort study of the OUTCOMEREA network. *PloS one*. 2021;16(8):e0255644.
101. Eftekhari SP, Kazemi S, Barary M, Javanian M, Ebrahimpour S, Ziaei N. Hydroxychloroquine and azithromycin: As a double edge sword for COVID-19? *medRxiv*. 2021.
102. Faico-Filho KS, Conte DD, Luna LKS, Carvalho JMA, Perosa AHS, Bellei N. Effect of hydroxychloroquine on SARS-CoV-2 viral load in patients with COVID-19. *MedRxiv*. 2020.
103. Fang X, Mei Q, Yang T, Li L, Wang Y, Tong F, et al. Low-dose corticosteroid therapy does not delay viral clearance in patients with COVID-19. *The Journal of infection*. 2020;81(1):147.
104. Feld JJ, Kandel C, Biondi MJ, Kozak RA, Zahoor MA, Lemieux C, et al. Peginterferon lambda for the treatment of outpatients with COVID-19: a phase 2, placebo-controlled randomised trial. *The Lancet Respiratory Medicine*. 2021;9(5):498-510.
105. Ferguson J, Volk S, Vondracek T, Flanigan J, Chernaik A. Empiric therapeutic anticoagulation and mortality in critically ill patients with respiratory failure from SARS-CoV-2: a retrospective cohort study. *The Journal of Clinical Pharmacology*. 2020;60(11):1411-5.
106. Fernandez-Caballero R, Arroyo VC, Herranz-Muñoz C, Henares-Lopez A. 4CPS-315 Evaluation of the effectiveness of early administration of tocilizumab in patients with COVID-19. *British Medical Journal Publishing Group*; 2021.
107. Fernandez-Cruz A, Ruiz-Antorán B, Muñoz-Gomez A, Sancho-Lopez A, Mills-Sanchez P, Centeno-Soto GA, et al. Impact of glucocorticoid treatment in SARS-COV-2 infection mortality: a retrospective controlled cohort study. *medRxiv*. 2020.
108. Firozabad AR, Meybodi ZA, Mousavinasab SR, Sahebhasagh A, Jelodar MG, Karimzadeh I, et al. Efficacy and safety of Levamisole treatment in clinical presentations of non-hospitalized patients with COVID-19: a double-blind, randomized, controlled trial. *BMC Infectious Diseases*. 2021;21(1):1-8.
109. Fisher MJ, Raymundo LAM, Monteforte M, Taub EM, Go R. Tocilizumab in the treatment of critical COVID-19 pneumonia: a retrospective cohort study of mechanically ventilated patients. *International Journal of Infectious Diseases*. 2021;103:536-9.
110. Flisiak R, Jaroszewicz J, Rogalska M, Łapiński T, Berkan-Kawińska A, Bolewska B, et al. Tocilizumab improves the prognosis of COVID-19 in patients with high IL-6. *Journal of Clinical Medicine*. 2021;10(8):1583.

## Comparative-effectiveness research of COVID-19 treatment: A rapid scoping review

111. Flisiak R, Zarebska-Michaluk D, Berkan-Kawinska A, Tudrujek-Zdunek M, Rogalska M, Piekarska A, et al. Remdesivir-based therapy improved recovery of patients with COVID-19 in the SARSTer multicentre, real-world study. medRxiv. 2020.
112. Frago-so-Saavedra S, Núñez I, Audelo-Cruz BM, Arias-Martínez S, Manzur-Sandoval D, Quintero-Villegas A, et al. Pyridostigmine in adults with severe SARS-CoV-2 infection: the PISCO trial. medRxiv. 2021.
113. Franchini M, Glingani C, Morandi M, Corghi G, Cerzosimo S, Beduzzi G, et al. Safety and efficacy of convalescent plasma in elderly COVID-19 patients: The RESCUE trial. Mayo Clinic Proceedings: Innovations, Quality & Outcomes. 2021;5(2):403-12.
114. Franzetti M, Forastieri A, Borsa N, Pandolfo A, Molteni C, Borghesi L, et al. IL-1 Receptor Antagonist Anakinra in the Treatment of COVID-19 Acute Respiratory Distress Syndrome: A Retrospective, Observational Study. The Journal of Immunology. 2021;206(7):1569-75.
115. Freedberg DE, Conigliaro J, Wang TC, Tracey KJ, Callahan MV, Abrams JA, et al. Famotidine use is associated with improved clinical outcomes in hospitalized COVID-19 patients: a propensity score matched retrospective cohort study. Gastroenterology. 2020;159(3):1129-31. e3.
116. Fu W, Liu Y, Liu L, Hu H, Cheng X, Liu P, et al. An open-label, randomized trial of the combination of IFN- $\kappa$  plus TFF2 with standard care in the treatment of patients with moderate COVID-19. EClinicalMedicine. 2020;27:100547.
117. Fu W, Liu Y, Xia L, Li M, Song Z, Hu H, et al. A clinical pilot study on the safety and efficacy of aerosol inhalation treatment of IFN- $\kappa$  plus TFF2 in patients with moderate COVID-19. EClinicalMedicine. 2020;25:100478.
118. Furtado RH, Berwanger O, Fonseca HA, Corrêa TD, Ferraz LR, Lapa MG, et al. Azithromycin in addition to standard of care versus standard of care alone in the treatment of patients admitted to the hospital with severe COVID-19 in Brazil (COALITION II): a randomised clinical trial. The Lancet. 2020;396(10256):959-67.
119. Fusina F, Albani F, Granato E, Meloni A, Rozzini R, Sabatini T, et al. Effect of corticosteroids on mortality in hospitalized COVID-19 patients not receiving invasive mechanical ventilation. Clinical Pharmacology & Therapeutics. 2021.
120. Gagliardini R, Cozzi-Lepri A, Mariano A, Taglietti F, Vergori A, Abdeddaim A, et al. No Efficacy of the Combination of Lopinavir/Ritonavir Plus Hydroxychloroquine Versus Standard of Care in Patients Hospitalized With COVID-19: A Non-Randomized Comparison. Frontiers in Pharmacology. 2021;12:520.
121. Gagliardini R, Cozzi-Lepri A, Mariano A, Taglietti F, Vergori A, Abdeddaim A, et al. No Efficacy of the Combination of Lopinavir/Ritonavir Plus Hydroxychloroquine Versus Standard of Care in Patients Hospitalized With COVID-19: A Non-Randomized Comparison. Frontiers in Pharmacology. 2021;12:520.
122. Gallay L, Tran V-T, Perrodeau E, Vignier N, Mahevas M, Bisio F, et al. Fourteen-day survival among older adults with severe infection with severe acute respiratory syndrome coronavirus 2 treated with corticosteroid: a cohort study. Clinical Microbiology and Infection. 2021.

**Comparative-effectiveness research of COVID-19 treatment: A rapid scoping review**

123. Gallay L, Tran V-T, Perrodeau E, Vignier N, Mahevas M, Bisio F, et al. Corticosteroids are associated with increased survival in elderly presenting severe SARS-Cov2 infection. medRxiv. 2020.
124. Galvez- Romero JL, Palmeros- Rojas O, Real- Ramírez FA, Sánchez- Romero S, Tome- Maxil R, Ramírez- Sandoval MP, et al. Cyclosporine A plus low- dose steroid treatment in COVID- 19 improves clinical outcomes in patients with moderate to severe disease: a pilot study. *Journal of internal medicine*. 2021;289(6):906-20.
125. Gao D, Xu M, Wang G, Lv J, Ma X, Guo Y, et al. The efficiency and safety of high-dose vitamin C in patients with COVID-19: A retrospective cohort study. *Aging (Albany NY)*. 2021;13(5):7020.
126. Gao G, Wang A, Wang S, Qian F, Chen M, Yu F, et al. Brief report: retrospective evaluation on the efficacy of lopinavir/ritonavir and chloroquine to treat nonsevere COVID-19 patients. *Journal of acquired immune deficiency syndromes (1999)*. 2020;85(2):239.
127. Gao X, Ma C, Ma Y, Wang X, Wei J, Feng T, et al. Clinical efficacy and safety of different antiviral regimens in patients with coronavirus disease 2019. *Zhonghua Wei Zhong Bing Ji Jiu Yi Xue*. 2020:1423-7.
128. Garibaldi BT, Wang K, Robinson ML, Zeger SL, Bandeen-Roche K, Wang M-C, et al. Comparison of Time to Clinical Improvement With vs Without Remdesivir Treatment in Hospitalized Patients With COVID-19. *JAMA network open*. 2021;4(3):e213071-e.
129. Geleris J, Sun Y, Platt J, Zucker J, Baldwin M, Hripcsak G, et al. Observational study of hydroxychloroquine in hospitalized patients with Covid-19. *New England Journal of Medicine*. 2020;382(25):2411-8.
130. Generali D, Bosio G, Malberti F, Cuzzoli A, Testa S, Romanini L, et al. Canakinumab as treatment for COVID-19-related pneumonia: a prospective case-control study. *International Journal of Infectious Diseases*. 2021;104:433-40.
131. Geriak M, Haddad F, Kullar R, Greenwood KL, Habib M, Habib C, et al. Randomized Prospective Open Label Study Shows No Impact on Clinical Outcome of Adding Losartan to Hospitalized COVID-19 Patients with Mild Hypoxemia. *Infectious diseases and therapy*. 2021:1-8.
132. Ghandehari S, Matusov Y, Pepkowitz S, Stein D, Kaderi T, Narayanan D, et al. Progesterone in Addition to Standard of Care vs Standard of Care Alone in the Treatment of Men Hospitalized With Moderate to Severe Covid-19: A Randomized, Controlled Pilot Trial. *Chest*. 2021.
133. Gharebaghi N, Nejadrahim R, Mousavi SJ, Sadat-Ebrahimi S-R, Hajizadeh R. The use of intravenous immunoglobulin gamma for the treatment of severe coronavirus disease 2019: a randomized placebo-controlled double-blind clinical trial. *BMC infectious diseases*. 2020;20(1):1-8.
134. Giacomelli A, Pagani G, Ridolfo AL, Oreni L, Conti F, Pezzati L, et al. Early administration of lopinavir/ritonavir plus hydroxychloroquine does not alter the clinical course of SARS- CoV- 2 infection: a retrospective cohort study. *Journal of Medical Virology*. 2021;93(3):1421-7.
135. Gokhale Y, Mehta R, Kulkarni U, Karnik N, Gokhale S, Sundar U, et al. Tocilizumab improves survival in severe COVID-19 pneumonia with persistent hypoxia: a retrospective cohort study with follow-up from Mumbai, India. *BMC Infectious Diseases*. 2021;21(1):1-10.

**Comparative-effectiveness research of COVID-19 treatment: A rapid scoping review**

136. Goldberg E, Zvi HB, Sheena L, Sofer S, Krause I, Sklan EH, et al. A real-life setting evaluation of the effect of remdesivir on viral load in COVID-19 patients admitted to a large tertiary centre in Israel. *Clinical Microbiology and Infection*. 2021;27(6):917. e1-. e4.
137. Goldman JD, Lye DC, Hui DS, Marks KM, Bruno R, Montejano R, et al. Remdesivir for 5 or 10 days in patients with severe Covid-19. *New England Journal of Medicine*. 2020;383(19):1827-37.
138. Gong W-J, Zhou T, Wu S-L, Ye J-L, Xu J-Q, Zeng F, et al. A retrospective analysis of clinical efficacy of ribavirin in adults hospitalized with severe COVID-19. *Journal of Infection and Chemotherapy*. 2021;27(6):876-81.
139. Gong Y, Guan L, Jin Z, Chen S, Xiang G, Gao B. Effects of methylprednisolone use on viral genomic nucleic acid negative conversion and CT imaging lesion absorption in COVID- 19 patients under 50 years old. *Journal of medical virology*. 2020;92(11):2551-5.
140. Gonzalez SE, Regairaz L, Salazar M, Ferrando N, Gonzalez V, Ramos PC, et al. Timing of Convalescent plasma administration and 28-day mortality for COVID-19 pneumonia. medRxiv. 2021.
141. Gonzalez-Ochoa AJ, Raffetto JD, Hernández AG, Zavala N, Gutiérrez O, Vargas A, et al. Sulodexide in the treatment of patients with early stages of COVID-19: a randomized controlled trial. *Thrombosis and haemostasis*. 2021.
142. Gonzalez-Ochoa AJ, Raffetto JD, Hernández AG, Zavala N, Gutiérrez O, Vargas A, et al. Sulodexide in the treatment of patients with early stages of COVID-19: a randomized controlled trial. *Thrombosis and haemostasis*. 2021.
143. Gordon AC, Mouncey PR, Al-Beidh F, Rowan KM, Nichol AD, Arabi YM, et al. Interleukin-6 receptor antagonists in critically ill patients with Covid-19. *The New England journal of medicine*. 2021.
144. Gorenstein SA, Castellano ML, Slone ES, Gillette B, Liu H, Alsamarraie C, et al. Hyperbaric oxygen therapy for COVID-19 patients with respiratory distress: treated cases versus propensity-matched controls. *Undersea Hyperb Med*. 2020:405-13.
145. Gottlieb RL, Nirula A, Chen P, Boscia J, Heller B, Morris J, et al. Effect of bamlanivimab as monotherapy or in combination with etesevimab on viral load in patients with mild to moderate COVID-19: a randomized clinical trial. *Jama*. 2021;325(7):632-44.
146. Grimaldi D, Aissaoui N, Blonz G, Carbutti G, Courcelle R, Gaudry S, et al. Characteristics and outcomes of acute respiratory distress syndrome related to COVID-19 in Belgian and French intensive care units according to antiviral strategies: the COVADIS multicentre observational study. *Annals of intensive care*. 2020;10(1):1-11.
147. Grimaldi D, Aissaoui N, Blonz G, Carbutti G, Courcelle R, Gaudry S, et al. Characteristics and outcomes of acute respiratory distress syndrome related to COVID-19 in Belgian and French intensive care units according to antiviral strategies: the COVADIS multicentre observational study. *Annals of intensive care*. 2020;10(1):1-11.
148. Group A-TL-CS. A neutralizing monoclonal antibody for hospitalized patients with Covid-19. *New England Journal of Medicine*. 2021;384(10):905-14.
149. Group RC. Effect of hydroxychloroquine in hospitalized patients with Covid-19. *New England Journal of Medicine*. 2020;383(21):2030-40.

**Comparative-effectiveness research of COVID-19 treatment: A rapid scoping review**

150. Group RC. Tocilizumab in patients admitted to hospital with COVID-19 (RECOVERY): a randomised, controlled, open-label, platform trial. *Lancet* (London, England). 2021;397(10285):1637.
151. Group TRC. Dexamethasone in hospitalized patients with Covid-19—preliminary report. *The New England journal of medicine*. 2020.
152. Guaraldi G, Meschiari M, Cozzi-Lepri A, Milic J, Tonelli R, Menozzi M, et al. Tocilizumab in patients with severe COVID-19: a retrospective cohort study. *The Lancet Rheumatology*. 2020;2(8):e474-e84.
153. Gunay S, Caliskan S, Sigirli D, Sahin E. Ventricular repolarization indexes in patients treated with hydroxychloroquine-azithromycin combination for COVID-19. *Bratislavske Lekarske Listy*. 2020;121(11):817-21.
154. Guner R, Hasanoglu I, Kayaaslan B, Aypak A, Akinci E, Bodur H, et al. Comparing ICU admission rates of mild/moderate COVID-19 patients treated with hydroxychloroquine, favipiravir, and hydroxychloroquine plus favipiravir. *Journal of Infection and Public Health*. 2021;14(3):365-70.
155. Gunst JD, Staerke NB, Pahus MH, Kristensen LH, Bodilsen J, Lohse N, et al. Efficacy of the TMPRSS2 inhibitor camostat mesilate in patients hospitalized with Covid-19—a double-blind randomized controlled trial. *EClinicalMedicine*. 2021:100849.
156. Gupta S, Wang W, Hayek SS, Chan L, Mathews KS, Melamed ML, et al. Association between early treatment with tocilizumab and mortality among critically ill patients with COVID-19. *JAMA internal medicine*. 2021;181(1):41-51.
157. Häberle H, Magunia H, Lang P, Gloeckner H, Körner A, Koeppen M, et al. Mesenchymal stem cell therapy for severe COVID-19 ARDS. *Journal of Intensive Care Medicine*. 2021;36(6):681-8.
158. Hacibekiroğlu T, Kalpakci Y, Genç AC, Hacibekiroğlu İ, Sunu C, Saricaoğlu A, et al. Efficacy of convalescent plasma according to blood groups in COVID-19 patients. *Turkish Journal of Medical Sciences*. 2021;51(1):45-8.
159. Halaby R, Cuker A, Yui J, Matthews A, Ishaaya E, Traxler E, et al. Bleeding risk by intensity of anticoagulation in critically ill patients with COVID- 19: A retrospective cohort study. *Journal of Thrombosis and Haemostasis*. 2021.
160. Hanif A, Khan S, Mantri N, Hanif S, Saleh M, Alla Y, et al. Thrombotic complications and anticoagulation in COVID-19 pneumonia: a New York City hospital experience. *Annals of hematology*. 2020;99(10):2323-8.
161. Hao S-r, Yan R, Zhang S-y, Lian J-s, Cai H, Zhang X-l, et al. Interferon- $\alpha$ 2b spray inhalation did not shorten virus shedding time of SARS-CoV-2 in hospitalized patients: a preliminary matched case-control study. *Journal Of Zhejiang University-Science B*. 2020;21(8):628-36.
162. Hasan MJ, Rabbani R, Anam AM, Huq SMR. Additional baricitinib loading dose improves clinical outcome in COVID-19. *Open Medicine*. 2021;16(1):041-6.
163. Hasan MJ, Rabbani R, Anam AM, Huq SMR, Polash MMI, Nessa SST, et al. Impact of high dose of baricitinib in severe COVID-19 pneumonia: a prospective cohort study in Bangladesh. *BMC Infectious Diseases*. 2021;21(1):1-9.

**Comparative-effectiveness research of COVID-19 treatment: A rapid scoping review**

164. Hashim HA, Maulood MF, Rasheed AM, Fatak DF, Kabah KK, Abdulamir AS. Controlled randomized clinical trial on using Ivermectin with Doxycycline for treating COVID-19 patients in Baghdad, Iraq. *MedRxiv*. 2020.
165. Hatzl S, Posch F, Sareban N, Stradner M, Roskopf K, Reisinger AC, et al. Convalescent plasma therapy and mortality in COVID-19 patients admitted to the ICU: a prospective observational study. *Annals of intensive care*. 2021;11(1):1-11.
166. Hayek ME, Mansour M, Ndetan H, Burkes Q, Corkern R, Dulli A, et al. Anti-Inflammatory treatment of COVID-19 pneumonia with tofacitinib alone or in combination with dexamethasone is safe and possibly superior to dexamethasone as a single agent in a predominantly African American cohort. *Mayo Clinic Proceedings: Innovations, Quality & Outcomes*. 2021.
167. Hazlett C, Wulf DA, Pasaniuc B, Arah OA, Erlandson KM, Montague BT. Credible learning of hydroxychloroquine and dexamethasone effects on COVID-19 mortality outside of randomized trials. *medRxiv*. 2020.
168. Helms J, Severac F, Merdji H, Schenck M, Clere-Jehl R, Baldacini M, et al. Higher anticoagulation targets and risk of thrombotic events in severe COVID-19 patients: bi-center cohort study. *Annals of Intensive Care*. 2021;11(1):1-8.
169. Hermine O, Mariette X, Tharaux P-L, Resche-Rigon M, Porcher R, Ravaud P, et al. Effect of tocilizumab vs usual care in adults hospitalized with COVID-19 and moderate or severe pneumonia: a randomized clinical trial. *JAMA internal medicine*. 2021;181(1):32-40.
170. Hernandez-Cardenas C, Thirion-Romero I, Rodríguez-Llamazares S, Rivera-Martinez NE, Meza-Meneses P, Remigio-Luna A, et al. Hydroxychloroquine for the treatment of severe respiratory infection by covid-19: a randomized controlled trial. *PloS one*. 2021;16(9):e0257238.
171. Herrero FS, Gimeno FP, García PO, Gómez CF, Mochón MDO, Deltoro MG. Methylprednisolone added to tocilizumab reduces mortality in SARS- CoV- 2 pneumonia: An observational study. *Journal of internal medicine*. 2020.
172. Hill JA, Menon MP, Dhanireddy S, Wurfel MM, Green M, Jain R, et al. Tocilizumab in hospitalized patients with COVID- 19: Clinical outcomes, inflammatory marker kinetics, and safety. *Journal of medical virology*. 2021;93(4):2270-80.
173. Hinks TS, Cureton L, Knight R, Wang A, Cane JL, Barber VS, et al. A randomised clinical trial of azithromycin versus standard care in ambulatory COVID-19—the ATOMIC2 trial. 2021.
174. Ho KS, Narasimhan B, Difabrizio L, Rogers L, Bose S, Li L, et al. Impact of corticosteroids in hospitalised COVID-19 patients. *BMJ open respiratory research*. 2021;8(1):e000766.
175. Hoertel N, Sánchez M, Vernet R, Beeker N, Neuraz A, Blanco C, et al. Association between hydroxyzine use and reduced mortality in patients hospitalized for coronavirus disease 2019: results from a multicenter observational study. *medRxiv*. 2020.
176. Hoertel N, Sánchez-Rico M, Gulbins E, Kornhuber J, Carpinteiro A, Abellán M, et al. Association between Psychotropic Medications Functionally Inhibiting Acid Sphingomyelinase and reduced risk of Intubation or Death among Individuals with Mental Disorder and Severe COVID-19: an Observational Study. *medRxiv*. 2021.

**Comparative-effectiveness research of COVID-19 treatment: A rapid scoping review**

177. Hoertel N, Sánchez-Rico M, Gulbins E, Kornhuber J, Carpinteiro A, Lenze EJ, et al. Association between Functional Inhibitors of Acid Sphingomyelinase and Reduced Risk of Intubation or Death in Individuals Hospitalized for Severe COVID-19: results from an observational multicenter study. medRxiv. 2021.
178. Hoertel N, Sánchez- Rico M, Vernet R, Beeker N, Neuraz A, Alvarado JM, et al. Dexamethasone use and mortality in hospitalized patients with coronavirus disease 2019: A multicentre retrospective observational study. *British journal of clinical pharmacology*. 2021.
179. Hoertel N, Sánchez- Rico M, Vernet R, Beeker N, Neuraz A, Alvarado JM, et al. Dexamethasone use and mortality in hospitalized patients with coronavirus disease 2019: A multicentre retrospective observational study. *British journal of clinical pharmacology*. 2021.
180. Hoertel N, Sánchez-Rico M, Vernet R, Jannot A-S, Neuraz A, Blanco C, et al. Observational study of chlorpromazine in hospitalized patients with COVID-19. *Clinical drug investigation*. 2021;41(3):221-33.
181. Hoertel N, Sánchez-Rico M, Vernet R, Jannot A-S, Neuraz A, Blanco C, et al. Observational study of haloperidol in hospitalized patients with COVID-19. *PloS one*. 2021;16(2):e0247122.
182. Hoertel N, Sánchez-Rico M, Vernet R, Jannot A-S, Neuraz A, Blanco C, et al. Observational study of chlorpromazine in hospitalized patients with COVID-19. *Clinical drug investigation*. 2021;41(3):221-33.
183. Hoertel N, Sánchez-Rico M, Vernet R, Jannot A-S, Neuraz A, Blanco C, et al. Observational study of haloperidol in hospitalized patients with COVID-19. *PloS one*. 2021;16(2):e0247122.
184. Hong G, Patel M, Tusha J, Giri P, Al-Janabi L, Adusumilli RK, et al. Corticosteroid Treatment In Patients With Severe COVID-19 Pneumonia. *Chest*. 2020;158(4):A599.
185. Horby P, Campbell M, Spata E. Colchicine in patients admitted to hospital with COVID-19 (RECOVERY): a randomised, controlled, open-label, platform trial. medRxiv. 2021.05. 18.21257267.
186. Horby PW, Campbell M, Staplin N, Spata E, Emberson JR, Pessoa-Amorim G, et al. Tocilizumab in patients admitted to hospital with COVID-19 (RECOVERY): preliminary results of a randomised, controlled, open-label, platform trial. medRxiv. 2021.
187. Horby PW, Estcourt L, Peto L, Emberson JR, Staplin N, Spata E, et al. Convalescent plasma in patients admitted to hospital with COVID-19 (RECOVERY): a randomised, controlled, open-label, platform trial. medRxiv. 2021.
188. Horby PW, Mafham M, Bell JL, Linsell L, Staplin N, Emberson J, et al. Lopinavir–ritonavir in patients admitted to hospital with COVID-19 (RECOVERY): a randomised, controlled, open-label, platform trial. *The Lancet*. 2020;396(10259):1345-52.
189. Horby PW, Roddick A, Spata E, Staplin N, Emberson JR, Pessoa-Amorim G, et al. Azithromycin in hospitalised patients with COVID-19 (RECOVERY): a randomised, controlled, open-label, platform trial. medRxiv. 2020.
190. Hraiech S, Bourenne J, Kuteifan K, Helms J, Carvelli J, Gainnier M, et al. Lack of viral clearance by the combination of hydroxychloroquine and azithromycin or lopinavir and ritonavir in SARS-CoV-2-related acute respiratory distress syndrome. *Annals of intensive care*. 2020;10:1-3.

**Comparative-effectiveness research of COVID-19 treatment: A rapid scoping review**

191. Hu K, Wang M, Zhao Y, Zhang Y, Wang T, Zheng Z, et al. A small-scale medication of leflunomide as a treatment of COVID-19 in an open-label blank-controlled clinical trial. *Virologica Sinica*. 2020;35(6):725-33.
192. Hu Y, Wang T, Hu Z, Wang X, Zhang Z, Li L, et al. Clinical efficacy of glucocorticoid on the treatment of patients with COVID-19 pneumonia: A single-center experience. *Biomedicine & Pharmacotherapy*. 2020;130:110529.
193. Huang C, Fei L, Li W, Xu W, Xie X, Li Q, et al. Efficacy evaluation of intravenous immunoglobulin in non-severe patients with COVID-19: a retrospective cohort study based on propensity score matching. *International Journal of Infectious Diseases*. 2021;105:525-31.
194. Huang CL, Fei L, Xu W, Li W, Xie XD, Li Q, et al. Efficacy Evaluation of Thymosin Alpha 1 in Non-severe Patients With COVID-19: A Retrospective Cohort Study Based on Propensity Score Matching. *Frontiers in Medicine*. 2021;8:436.
195. Huang CL, Fei L, Xu W, Li W, Xie XD, Li Q, et al. Efficacy Evaluation of Thymosin Alpha 1 in Non-severe Patients With COVID-19: A Retrospective Cohort Study Based on Propensity Score Matching. *Frontiers in Medicine*. 2021;8:436.
196. Huang E, Isonaka S, Yang H, Salce E, Rosales E, Jordan SC. Tocilizumab treatment in critically ill patients with COVID-19: A retrospective observational study. *International Journal of Infectious Diseases*. 2021;105:245-51.
197. Huang HD, Jneid H, Aziz M, Ravi V, Sharma PS, Larsen T, et al. Safety and effectiveness of hydroxychloroquine and azithromycin combination therapy for treatment of hospitalized patients with COVID-19: a Propensity-Matched study. *Cardiology and therapy*. 2020;9(2):523-34.
198. Huang R, Zhu C, Wang J, Xue L, Li C, Yan X, et al. Corticosteroid therapy is associated with the delay of SARS-CoV-2 clearance in COVID-19 patients. *European journal of pharmacology*. 2020;889:173556.
199. Huang Y-Q, Tang S-Q, Xu X-L, Zeng Y-M, He X-Q, Li Y, et al. No statistically apparent difference in antiviral effectiveness observed among ribavirin plus interferon-alpha, lopinavir/ritonavir plus interferon-alpha, and ribavirin plus lopinavir/ritonavir plus interferon-alpha in patients with mild to moderate coronavirus disease 2019: results of a randomized, open-labeled prospective study. *Frontiers in pharmacology*. 2020;11:1071.
200. Huet T, Beaussier H, Voisin O, Jouveshomme S, Dauriat G, Lazareth I, et al. Anakinra for severe forms of COVID-19: a cohort study. *The Lancet Rheumatology*. 2020;2(7):e393-e400.
201. Hung IF-N, Lung K-C, Tso EY-K, Liu R, Chung TW-H, Chu M-Y, et al. Triple combination of interferon beta-1b, lopinavir-ritonavir, and ribavirin in the treatment of patients admitted to hospital with COVID-19: an open-label, randomised, phase 2 trial. *The Lancet*. 2020;395(10238):1695-704.
202. Husby A, Pottgaard A, Hviid AP. Inhaled corticosteroid use in COVID-19. *medRxiv*. 2020.
203. Iglesias-Julián E, López-Veloso M, de-la-Torre-Ferrera N, Barraza-Vengoechea JC, Delgado-López PD, Colazo-Burlato M, et al. High dose subcutaneous Anakinra to treat acute respiratory distress syndrome secondary to cytokine storm syndrome among severely ill COVID-19 patients. *Journal of Autoimmunity*. 2020;115:102537.



**Comparative-effectiveness research of COVID-19 treatment: A rapid scoping review**

204. Ignatius EH, Wang K, Karaba A, Robinson M, Avery RK, Blair P, et al., editors. Tocilizumab for the treatment of COVID-19 among hospitalized patients: a matched retrospective cohort analysis. *Open Forum Infectious Diseases*; 2021: Oxford University Press US.
205. Ilgin BU, Koyuncu İMA, Kızıltunç E. Effect of triple antimicrobial therapy on electrocardiography parameters in patients with mild-to-moderate coronavirus disease 2019. *Anatolian Journal of Cardiology*. 2021;25(3):184.
206. Ionescu F, Grasso-Knight G, Castillo E, Naeem E, Petrescu I, Imam Z, et al. Therapeutic anticoagulation delays death in COVID-19 patients: cross-sectional analysis of a prospective cohort. *TH Open*. 2020;4(03):e263-e70.
207. Ionescu F, Jaiyesimi I, Petrescu I, Lawler PR, Castillo E, Munoz- Maldonado Y, et al. Association of anticoagulation dose and survival in hospitalized COVID- 19 patients: A retrospective propensity score- weighted analysis. *European journal of haematology*. 2021;106(2):165-74.
208. Ip A, Ahn J, Zhou Y, Goy AH, Hansen E, Pecora AL, et al. Hydroxychloroquine in the treatment of outpatients with mildly symptomatic COVID-19: a multi-center observational study. *BMC infectious diseases*. 2021;21(1):1-12.
209. Ip A, Berry DA, Hansen E, Goy AH, Pecora AL, Sinclair BA, et al. Hydroxychloroquine and tocilizumab therapy in COVID-19 patients—an observational study. *PloS one*. 2020;15(8):e0237693.
210. Ivashchenko AA, Dmitriev KA, Vostokova NV, Azarova VN, Blinow AA, Egorova AN, et al. AVIFAVIR for treatment of patients with moderate COVID-19: interim results of a phase II/III multicenter randomized clinical trial. *medRxiv*. 2020.
211. Jagannathan P, Andrews JR, Bonilla H, Hedlin H, Jacobson KB, Balasubramanian V, et al. Peginterferon Lambda-1a for treatment of outpatients with uncomplicated COVID-19: a randomized placebo-controlled trial. *Nature communications*. 2021;12(1):1-10.
212. Jarrett MP, Licht WB, Bock K, Brown Z, Hirsch JS, Coppa K, et al. Early Experience With Neutralizing Monoclonal Antibody Therapy For COVID-19. *medRxiv*. 2021.
213. Jeronimo CMP, Farias MEL, Val FFA, Sampaio VS, Alexandre MAA, Melo GC, et al. Methylprednisolone as adjunctive therapy for patients hospitalized with COVID-19 (Metcovid): a randomised, double-blind, phase IIb, placebo-controlled trial. 2020.
214. Ji J, Wu M, Zhong L, Liu Z, Wang C, Shao Z, et al. Early, low-dose, short-term methylprednisolone decreased the mortality in critical COVID-19 patients: A multicenter retrospective cohort study. *Journal of Infection*. 2021;82(4):84-123.
215. Ji J, Zhang J, Shao Z, Xie Q, Zhong L, Liu Z. Glucocorticoid therapy does not delay viral clearance in COVID-19 patients. *Critical Care*. 2020;24(1):1-4.
216. Jiang W, Li W, Xiong L, Wu Q, Wu J, He B, et al. Clinical efficacy of convalescent plasma therapy on treating COVID- 19 patients: Evidence from matched study and a meta- analysis. *Clinical and translational medicine*. 2020;10(8).
217. Jie X, Hongmei Y, Ping F, Kuikui Z, Bohan Y, Rui M. Beneficial effect of Arbidol in the management of COVID-19 infection. *Aging (Albany NY)*. 2021;13(7):9253.

**Comparative-effectiveness research of COVID-19 treatment: A rapid scoping review**

- 1  
2  
3 218. Jiménez-Soto R, Aguilar-Soto M, Demichelis R. The impact of different prophylactic  
4 anticoagulation doses on the outcomes of patients with COVID-19. *Blood*. 2020;136:17.  
5
- 6 219. Jonmarker S, Hollenberg J, Dahlberg M, Stackelberg O, Litorell J, Everhov ÅH, et al. Dosing of  
7 thromboprophylaxis and mortality in critically ill COVID-19 patients. *Critical Care*. 2020;24(1):1-10.  
8
- 9 220. Jonmarker S, Hollenberg J, Dahlberg M, Stackelberg O, Litorell J, Everhov ÅH, et al. Dosing of  
10 thromboprophylaxis and mortality in critically ill COVID-19 patients. *Critical Care*. 2020;24(1):1-10.  
11
- 12 221. Joyner MJ, Senefeld JW, Klassen SA, Mills JR, Johnson PW, Theel ES, et al. Effect of  
13 convalescent plasma on mortality among hospitalized patients with COVID-19: initial three-month  
14 experience. medrxiv. 2020.  
15
- 16 222. Kalil AC, Patterson TF, Mehta AK, Tomashek KM, Wolfe CR, Ghazaryan V, et al. Baricitinib  
17 plus remdesivir for hospitalized adults with Covid-19. *New England Journal of Medicine*.  
18 2021;384(9):795-807.  
19
- 20 223. Kalligeros M, Shehadeh F, Atalla E, Mylona EK, Aung S, Pandita A, et al. Hydroxychloroquine  
21 use in hospitalised patients with COVID-19: an observational matched cohort study. *Journal of global*  
22 *antimicrobial resistance*. 2020;22:842-4.  
23
- 24 224. Kalligeros M, Tashima KT, Mylona EK, Rybak N, Flanigan TP, Farmakiotis D, et al., editors.  
25 Remdesivir use compared with supportive care in hospitalized patients with severe COVID-19: a single-  
26 center experience. *Open forum infectious diseases*; 2020: Oxford University Press US.  
27
- 28 225. Kaminski MA, Sunny S, Balabayova K, Kaur A, Gupta A, Abdallah M, et al. Tocilizumab  
29 therapy for COVID-19: A comparison of subcutaneous and intravenous therapies. *International Journal of*  
30 *Infectious Diseases*. 2020;101:59-64.  
31
- 32 226. Kamran SM, Mirza Z-e-H, Naseem A, Liaqat J, Fazal I, Alamgir W, et al. Therapeutic plasma  
33 exchange for coronavirus disease-2019 triggered cytokine release syndrome; a retrospective propensity  
34 matched control study. *PloS one*. 2021;16(1):e0244853.  
35
- 36 227. Kamran SM, Moeed HA, Zill-e-Humayun Mirza AN, Azam R, Ullah N, Saeed F, et al. Clearing  
37 the fog: Is hydroxychloroquine effective in reducing coronavirus disease-2019 progression? A  
38 randomized controlled trial. *Cureus*. 2021;13(3).  
39
- 40 228. Karolyi M, Pawelka E, Mader T, Omid S, Kelani H, Ely S, et al. Hydroxychloroquine versus  
41 lopinavir/ritonavir in severe COVID-19 patients. *Wiener Klinische Wochenschrift*. 2021;133(7):284-91.  
42
- 43 229. Katia F, Myriam DP, Ucciferri C, Auricchio A, Di Nicola M, Marchioni M, et al. Efficacy of  
44 canakinumab in mild or severe COVID- 19 pneumonia. *Immunity, Inflammation and Disease*.  
45 2021;9(2):399-405.  
46
- 47 230. Kaushal S, Khan A, Deatrick K, Ng DK, Snyder A, Shah A, et al. Intravenous Mesenchymal  
48 Stem Cells in Extracorporeal Oxygenation Patients with Severe COVID-19 Acute Respiratory Distress  
49 Syndrome. medRxiv. 2020.  
50
- 51 231. Keller MJ, Kitsis EA, Arora S, Chen J-T, Agarwal S, Ross MJ, et al. Effect of systemic  
52 glucocorticoids on mortality or mechanical ventilation in patients with COVID-19. *Journal of hospital*  
53 *medicine*. 2020;15(8):489.  
54  
55  
56  
57  
58  
59  
60

**Comparative-effectiveness research of COVID-19 treatment: A rapid scoping review**

232. Kelly M, O'Connor R, Townsend L, Coghlan M, Relihan E, Moriarty M, et al. Clinical outcomes and adverse events in patients hospitalised with COVID- 19, treated with off- label hydroxychloroquine and azithromycin. *British journal of clinical pharmacology*. 2021;87(3):1150-4.
233. Kewan T, Covut F, Al-Jaghbeer MJ, Rose L, Gopalakrishna K, Akbik B. Tocilizumab for treatment of patients with severe COVID-19: A retrospective cohort study. *EClinicalMedicine*. 2020;24:100418.
234. Khamis F, Al Naabi H, Al Lawati A, Ambusaidi Z, Al Sharji M, Al Barwani U, et al. Randomized controlled open label trial on the use of favipiravir combined with inhaled interferon beta-1b in hospitalized patients with moderate to severe COVID-19 pneumonia. *International Journal of Infectious Diseases*. 2021;102:538-43.
235. Khamis F, Memish Z, Al Bahrani M, Al Nummani H, Al Raisi D, Al Dowaiqi S, et al. The Role of Convalescent Plasma and Tocilizumab in the Management of COVID-19 Infection: A Cohort of 110 Patients from a Tertiary Care Hospital in Oman. *Journal of Epidemiology and Global Health*. 2021;11(2):216-23.
236. Khoo SH, FitzGerald R, Fletcher T, Ewings S, Jaki T, Lyon R, et al. Optimal dose and safety of molnupiravir in patients with early SARS-CoV-2: a phase 1, dose-escalating, randomised controlled study. *medRxiv*. 2021.
237. Kim EJ, Choi SH, Park JS, Kwon YS, Lee J, Kim Y, et al. Use of darunavir-cobicistat as a treatment option for critically ill patients with SARS-CoV-2 infection. *Yonsei Medical Journal*. 2020;61(9):826.
238. Kim J-W, Kim EJ, Kwon HH, Jung CY, Kim KC, Choe J-Y, et al. Lopinavir-ritonavir versus hydroxychloroquine for viral clearance and clinical improvement in patients with mild to moderate coronavirus disease 2019. *The Korean journal of internal medicine*. 2021;36(Suppl 1):S253.
239. Kimmig LM, Wu D, Gold M, Pettit NN, Pitrak D, Mueller J, et al. Il-6 inhibition in critically ill COVID-19 patients is associated with increased secondary infections. *Frontiers in medicine*. 2020;7:689.
240. Kimmig LM, Wu D, Gold M, Pettit NN, Pitrak D, Mueller J, et al. Il-6 inhibition in critically ill COVID-19 patients is associated with increased secondary infections. *Frontiers in medicine*. 2020;7:689.
241. Kirkup C, Pawlowski C, Puranik A, Conrad I, O'Horo JC, Gomaa D, et al. Healthcare disparities among anticoagulation therapies for severe COVID- 19 patients in the multi- site VIRUS registry. *Journal of medical virology*. 2021;93(7):4303-18.
242. Klapholz M, Pentakota SR, Zertuche J-P, McKenna M, Roque W, Forsberg M, et al., editors. Matched Cohort Study of Convalescent COVID-19 Plasma Treatment in Severely or Life Threateningly Ill COVID-19 Patients. *Open Forum Infectious Diseases*; 2021: Oxford University Press US.
243. Klein MN, Wang EW, Zimand P, Beauchamp H, Donis C, Ward MD, et al. Kinetics of SARS-CoV-2 antibody responses pre-COVID-19 and post-COVID-19 convalescent plasma transfusion in patients with severe respiratory failure: an observational case-control study. *Journal of clinical pathology*. 2021.
244. Klein MN, Wang EW, Zimand P, Beauchamp H, Donis C, Ward MD, et al. Kinetics of SARS-CoV-2 antibody responses pre-COVID-19 and post-COVID-19 convalescent plasma transfusion in

## Comparative-effectiveness research of COVID-19 treatment: A rapid scoping review

patients with severe respiratory failure: an observational case-control study. *Journal of clinical pathology*. 2021.

245. Klopfenstein T, Zayet S, Lohse A, Balblanc J-C, Badie J, Royer P-Y, et al. Tocilizumab therapy reduced intensive care unit admissions and/or mortality in COVID-19 patients. *Medecine et maladies infectieuses*. 2020;50(5):397-400.

246. Klopfenstein T, Zayet S, Lohse A, Selles P, Zahra H, Toko L, et al. Impact of tocilizumab on mortality and/or invasive mechanical ventilation requirement in a cohort of 206 COVID-19 patients. *International Journal of Infectious Diseases*. 2020;99:491-5.

247. Kocayiğit H, Demir G, Karacan A, Süner KÖ, Tomak Y, Yaylacı S, et al. Effects on mortality of early vs late administration of convalescent plasma in the treatment of Covid-19. *Transfusion and Apheresis Science*. 2021:103148.

248. Kocayiğit H, Özmen Süner K, Tomak Y, Demir G, Yaylacı S, Dheir H, et al. Observational study of the effects of Favipiravir vs Lopinavir/Ritonavir on clinical outcomes in critically ill patients with COVID-19. *Journal of Clinical Pharmacy and Therapeutics*. 2021;46(2):454-9.

249. Koerper S, Weiss M, Zickler D, Wiesmann T, Zacharowski K, Corman VM, et al. High Dose Convalescent Plasma in COVID-19: Results from the randomized Trial CAPSID. *medRxiv*. 2021.

250. Komissarov A, Molodtsov I, Ivanova O, Maryukhnich E, Kudryavtseva S, Mazus A, et al. High SARS-CoV-2 load in the nasopharynx of patients with a mild form of COVID-19 is associated with clinical deterioration regardless of the hydroxychloroquine administration. *PLoS one*. 2021;16(1):e0246396.

251. Kooistra EJ, Waalders NJ, Grondman I, Janssen NA, de Nooijer AH, Netea MG, et al. Anakinra treatment in critically ill COVID-19 patients: a prospective cohort study. *Critical care*. 2020;24(1):1-12.

252. Kumar RN, Wu E-L, Stosor V, Moore WJ, Achenbach C, Ison MG, et al. Real-world experience of bamlanivimab for COVID-19: a case-control study. *Clinical Infectious Diseases: an Official Publication of the Infectious Diseases Society of America*. 2021.

253. Kumar S, De Souza R, Nadkar M, Guleria R, Trikha A, Joshi SR, et al. A two-arm, randomized, controlled, multi-centric, open-label phase-2 study to evaluate the efficacy and safety of Itolizumab in moderate to severe ARDS patients due to COVID-19. *Expert opinion on biological therapy*. 2021;21(5):675-86.

254. Kumari P, Dembra S, Dembra P, Bhawna F, Gul A, Ali B, et al. The role of vitamin C as adjuvant therapy in COVID-19. *Cureus*. 2020;12(11).

255. Kurd R, Ben-Chetrit E, Karameh H, Bar-Meir M. Compassionate Use of Opaganib For Patients with Severe COVID-19. *medRxiv*. 2020.

256. Kyriazopoulou E, Panagopoulos P, Metallidis S, Dalekos GN, Poulakou G, Gatselis N, et al. Anakinra to prevent respiratory failure in COVID-19. *medRxiv*. 2020.

257. Kyriazopoulou E, Poulakou G, Milionis H, Metallidis S, Adamis G, Tsiakos K, et al. Early Anakinra Treatment for COVID-19 Guided by Urokinase Plasminogen Receptor. *medRxiv*. 2021.

**Comparative-effectiveness research of COVID-19 treatment: A rapid scoping review**

258. Lagier J-C, Million M, Gautret P, Colson P, Cortaredona S, Giraud-Gatineau A, et al. Outcomes of 3,737 COVID-19 patients treated with hydroxychloroquine/azithromycin and other regimens in Marseille, France: A retrospective analysis. *Travel medicine and infectious disease*. 2020;36:101791.
259. Lam C, Siefkas A, Zelin NS, Barnes G, Dellinger RP, Vincent J-L, et al. Machine Learning as a Precision-Medicine Approach to Prescribing COVID-19 Pharmacotherapy with Remdesivir or Corticosteroids. *Clinical therapeutics*. 2021.
260. Lamback EB, Oliveira MAd, Haddad AF, Vieira AFM, Ferreira AL, Maia TdS, et al. Hydroxychloroquine with azithromycin in patients hospitalized for mild and moderate COVID-19. *Brazilian Journal of Infectious Diseases*. 2021;25.
261. Lambermont B, Ernst M, Demaret P, Boccar S, Gurdebeke C, Cedric VB, et al. Predictors of Mortality and Effect of Drug Therapies in Mechanically Ventilated Patients With Coronavirus Disease 2019: A Multicenter Cohort Study. *Critical care explorations*. 2020;2(12).
262. Lammers A, Brohet R, Theunissen R, Koster C, Rood R, Verhagen D, et al. Early hydroxychloroquine but not chloroquine use reduces ICU admission in COVID-19 patients. *International Journal of Infectious Diseases*. 2020;101:283-9.
263. Lan X, Shao C, Zeng X, Wu Z, Xu Y. Lopinavir-ritonavir alone or combined with arbidol in the treatment of 73 hospitalized patients with COVID-19: a pilot retrospective study. *MedRxiv*. 2020.
264. Landewé RB, Ramiro S, Mostard RL. COVID-19-induced hyperinflammation, immunosuppression, recovery and survival: how causal inference may help draw robust conclusions. *RMD open*. 2021;7(1):e001638.
265. Langer-Gould A, Smith JB, Gonzales EG, Castillo RD, Figueroa JG, Ramanathan A, et al. Early identification of COVID-19 cytokine storm and treatment with anakinra or tocilizumab. *International Journal of Infectious Diseases*. 2020;99:291-7.
266. Lanzoni G, Linetsky E, Correa D, Messinger Cayetano S, Alvarez RA, Kouroupis D, et al. Umbilical cord mesenchymal stem cells for COVID-19 acute respiratory distress syndrome: A double-blind, phase 1/2a, randomized controlled trial. *Stem cells translational medicine*. 2021;10(5):660-73.
267. Lattman E, Bhalerao P, ShashiBhushan B, Nargundkar N, Lattmann P, Balaram P. Randomized, Comparative, Clinical Trial to Evaluate Efficacy and Safety of PNB001 in Moderate COVID-19 Patients. *medRxiv*. 2021.
268. Lauriola M, Pani A, Ippoliti G, Mortara A, Milighetti S, Mazen M, et al. Effect of Combination Therapy of Hydroxychloroquine and Azithromycin on Mortality in Patients With COVID-19. *Clinical and translational science*. 2020;13(6):1071-6.
269. Lavinio A, Ercole A, Battaglini D, Magnoni S, Badenes R, Taccone FS, et al. Safety profile of enhanced thromboprophylaxis strategies for critically ill COVID-19 patients during the first wave of the pandemic: observational report from 28 European intensive care units. *Critical Care*. 2021;25(1):1-10.
270. Lawler PR, Goligher EC, Berger JS, Neal MD, McVerry BJ, Nicolau JC, et al. Therapeutic anticoagulation in non-critically ill patients with COVID-19. *medRxiv*. 2021.

**Comparative-effectiveness research of COVID-19 treatment: A rapid scoping review**

271. Lecronier M, Beurton A, Burrell S, Haudebourg L, Deleris R, Le Marec J, et al. Comparison of hydroxychloroquine, lopinavir/ritonavir, and standard of care in critically ill patients with SARS-CoV-2 pneumonia: an opportunistic retrospective analysis. *Critical Care*. 2020;24(1):1-9.
272. Lee HW, Park J, Lee J-K, Park TY, Heo EY. The effect of the timing of dexamethasone administration in patients with COVID-19 pneumonia. *Tuberculosis and respiratory diseases*. 2021.
273. Lemos ACB, do Espírito Santo DA, Salvetti MC, Gilio RN, Agra LB, Pazin-Filho A, et al. Therapeutic versus prophylactic anticoagulation for severe COVID-19: A randomized phase II clinical trial (HESACOVID). *Thrombosis research*. 2020;196:359-66.
274. Lenze EJ, Mattar C, Zorumski CF, Stevens A, Schweiger J, Nicol GE, et al. Fluvoxamine vs placebo and clinical deterioration in outpatients with symptomatic COVID-19: a randomized clinical trial. *Jama*. 2020;324(22):2292-300.
275. Lescure F-X, Honda H, Fowler RA, Lazar JS, Shi G, Wung P, et al. Sarilumab treatment of hospitalised patients with severe or critical COVID-19: a multinational, randomised, adaptive, phase 3, double-blind, placebo-controlled trial. *medRxiv*. 2021.
276. Lewis TC, Adhikari S, Tatapudi V, Holub M, Kunichoff D, Troxel AB, et al. A propensity-matched cohort study of tocilizumab in patients with coronavirus disease 2019. *Critical care explorations*. 2020;2(11).
277. Li C, Luo F, Liu C, Xiong N, Xu Z, Zhang W, et al. Effect of a genetically engineered interferon-alpha versus traditional interferon-alpha in the treatment of moderate-to-severe COVID-19: a randomised clinical trial. *Annals of medicine*. 2021;53(1):391-401.
278. Li G, Yuan M, Li H, Deng C, Wang Q, Tang Y, et al. Safety and efficacy of artemisinin-piperaquine for treatment of COVID-19: an open-label, non-randomised and controlled trial. *International journal of antimicrobial agents*. 2021;57(1):106216.
279. Li H, Xiong N, Li C, Gong Y, Liu L, Yang H, et al. Efficacy of ribavirin and interferon- $\alpha$  therapy for hospitalized patients with COVID-19: A multicenter, retrospective cohort study. *International Journal of Infectious Diseases*. 2021;104:641-8.
280. Li L, Zhang W, Hu Y, Tong X, Zheng S, Yang J, et al. Effect of convalescent plasma therapy on time to clinical improvement in patients with severe and life-threatening COVID-19: a randomized clinical trial. *Jama*. 2020;324(5):460-70.
281. Li M, Gitarts S, Nyabera A, Kondaveeti R, Hammudeh Y, Gonzalez C, et al. Continuous Infusion Low-Dose Unfractionated Heparin for the Management of Hypercoagulability Associated With COVID-19. *Journal of Pharmacy Practice*. 2020:0897190020966207.
282. Li M, Yoo EJ, Baram M, McArthur M, Skeehan C, Awsare B, et al. Tocilizumab in the Management of COVID-19: A Preliminary Report. *The American Journal of the Medical Sciences*. 2021;361(2):208-15.
283. Li M, Yu T, Zhu J, Wang Y, Yang Y, Zhao K, et al. Comparison of the antiviral effect of Arbidol and Chloroquine in treating COVID-19. *Annals of Palliative Medicine*. 2021;10(3):3307-12.
284. Li P, Lu Z, Li Q, Wang Z, Guo Y, Cai C, et al. Administration Timing and Efficacy of Tocilizumab in Patients With COVID-19 and Elevated IL-6. *Frontiers in Molecular Biosciences*. 2021;8.

**Comparative-effectiveness research of COVID-19 treatment: A rapid scoping review**

285. Li Q, Li W, Jin Y, Xu W, Huang C, Li L, et al. Efficacy evaluation of early, low-dose, short-term corticosteroids in adults hospitalized with non-severe COVID-19 pneumonia: a retrospective cohort study. *Infectious diseases and therapy*. 2020;9(4):823-36.
286. Li T, Sun L, Zhang W, Zheng C, Jiang C, Chen M, et al. Bromhexine hydrochloride tablets for the treatment of moderate COVID- 19: an open- label randomized controlled pilot study. *Clinical and translational science*. 2020;13(6):1096-102.
287. Li X, Liu L, Yang Y, Yang X, Wang C, Li Y, et al. Gender-associated difference following COVID-19 virus infection: Implications for thymosin alpha-1 therapy. *International Immunopharmacology*. 2021;90:107022.
288. Li Y, Li J, Ke J, Jiao N, Zhu L, Shen L, et al. Adverse outcomes associated with corticosteroid use in critical COVID-19: a retrospective multicenter cohort study. *Frontiers in medicine*. 2021;8.
289. Li Y, Meng Q, Rao X, Wang B, Zhang X, Dong F, et al. Corticosteroid therapy in critically ill patients with COVID-19: a multicenter, retrospective study. *Critical Care*. 2020;24(1):1-10.
290. Li Y, Xie Z, Lin W, Cai W, Wen C, Guan Y, et al. Efficacy and safety of lopinavir/ritonavir or arbidol in adult patients with mild/moderate COVID-19: an exploratory randomized controlled trial. *Med*. 2020;1(1):105-13. e4.
291. Li Y, Zhou X, Li T, Chan S, Yu Y, Ai J-W, et al. Corticosteroid prevents COVID-19 progression within its therapeutic window: a multicentre, proof-of-concept, observational study. *Emerging microbes & infections*. 2020;9(1):1869-77.
292. Lian N, Xie H, Lin S, Huang J, Zhao J, Lin Q. Umifenovir treatment is not associated with improved outcomes in patients with coronavirus disease 2019: a retrospective study. *Clinical Microbiology and Infection*. 2020;26(7):917-21.
293. Liang M-y, Chen P, He M, Tang J, Li H, He X-l, et al. Corticosteroids treatment of patients with coronavirus disease 2019: a propensity score matching study. *Current medical science*. 2021;41(1):24-30.
294. Libster R, Marc GP, Wappner D, Coviello S, Bianchi A, Braem V, et al. Prevention of severe COVID-19 in the elderly by early high-titer plasma. *MedRxiv*. 2020.
295. Libster R, Pérez Marc G, Wappner D, Coviello S, Bianchi A, Braem V, et al. Early high-titer plasma therapy to prevent severe Covid-19 in older adults. *New England Journal of Medicine*. 2021;384(7):610-8.
296. Liesenborghs L, Spriet I, Jochmans D, Belmans A, Gyselinck I, Teuwen L-A, et al. Itraconazole for COVID-19: preclinical studies and a proof-of-concept randomized clinical trial. *EBioMedicine*. 2021;66:103288.
297. Lima-Morales R, Méndez-Hernández P, Flores YN, Osorno-Romero P, Sancho-Hernández CR, Cuecuecha-Rugiero E, et al. Effectiveness of a multidrug therapy consisting of Ivermectin, Azithromycin, Montelukast, and Acetylsalicylic acid to prevent hospitalization and death among ambulatory COVID-19 cases in Tlaxcala, Mexico. *International Journal of Infectious Diseases*. 2021;105:598-605.
298. Liu J, Hua M, Du C, Pu L, Xiang P, Li C, et al. The dual role of anti-viral therapy in the treatment of Coronavirus disease 2019. *European Review for Medical and Pharmacological Sciences*. 2020;24(22):11939-44.

**Comparative-effectiveness research of COVID-19 treatment: A rapid scoping review**

- 1  
2  
3 299. Liu J, Zhang S, Dong X, Li Z, Xu Q, Feng H, et al. Corticosteroid treatment in severe COVID-19  
4 patients with acute respiratory distress syndrome. *Journal of Clinical Investigation*. 2020;130(12):6417-  
5 28.  
6  
7 300. Liu Q, Huang N, Li A, Zhou Y, Liang L, Song X, et al. Effect of low-dose aspirin on mortality  
8 and viral duration of the hospitalized adults with COVID-19. *Medicine*. 2021;100(6).  
9  
10 301. Liu ST, Lin H-M, Baine I, Wajnberg A, Gumprecht JP, Rahman F, et al. Convalescent plasma  
11 treatment of severe COVID-19: a propensity score-matched control study. *Nature medicine*.  
12 2020;26(11):1708-13.  
13  
14 302. Liu ST, Lin H-M, Baine I, Wajnberg A, Gumprecht JP, Rahman F, et al. Convalescent plasma  
15 treatment of severe COVID-19: a propensity score-matched control study. *Nature medicine*.  
16 2020;26(11):1708-13.  
17  
18 303. Liu Y, Pang Y, Hu Z, Wu M, Wang C, Feng Z, et al. Thymosin alpha 1 (Tα1) reduces the  
19 mortality of severe COVID-19 by restoration of lymphocytopenia and reversion of exhausted T cells.  
20 *Clinical Infectious Diseases*. 2020.  
21  
22 304. Liu Z, Li X, Fan G, Zhou F, Wang Y, Huang L, et al. Low-to-moderate dose corticosteroids  
23 treatment in hospitalized adults with COVID-19. *Clinical Microbiology and Infection*. 2021;27(1):112-7.  
24  
25 305. Lofgren SM, Nicol MR, Bangdiwala AS, Pastick KA, Okafor EC, Skipper CP, et al., editors.  
26 Safety of hydroxychloroquine among outpatient clinical trial participants for COVID-19. *Open forum*  
27 *infectious diseases*; 2020: Oxford University Press US.  
28  
29 306. Lofgren SM, Nicol MR, Bangdiwala AS, Pastick KA, Okafor EC, Skipper CP, et al., editors.  
30 Safety of hydroxychloroquine among outpatient clinical trial participants for COVID-19. *Open forum*  
31 *infectious diseases*; 2020: Oxford University Press US.  
32  
33 307. Lopardo G, Belloso WH, Nannini E, Colonna M, Sanguineti S, Zylberman V, et al. RBD-specific  
34 polyclonal F(ab')<sub>2</sub> fragments of equine antibodies in patients with moderate to severe COVID-19  
35 disease: A randomized, multicenter, double-blind, placebo-controlled, adaptive phase 2/3 clinical trial.  
36 *EClinicalMedicine*. 2021;34:100843.  
37  
38 308. Lopes MI, Bonjorno LP, Giannini MC, Amaral NB, Menezes PI, Dib SM, et al. Beneficial effects  
39 of colchicine for moderate to severe COVID-19: a randomised, double-blinded, placebo-controlled  
40 clinical trial. *RMD open*. 2021;7(1):e001455.  
41  
42 309. Lopes MIF, Bonjorno LP, Giannini MC, Amaral NB, Benatti MN, Rezek UC, et al. Beneficial  
43 effects of colchicine for moderate to severe COVID-19: an interim analysis of a randomized, double-  
44 blinded, placebo controlled clinical trial. *MedRxiv*. 2020.  
45  
46 310. Lopez A, Duclos G, Pastene B, Bezulier K, Guilhaumou R, Solas C, et al. Effects of  
47 hydroxychloroquine on Covid-19 in intensive care unit patients: preliminary results. *International journal*  
48 *of antimicrobial agents*. 2020;56(5):106136.  
49  
50 311. López-Medina E, López P, Hurtado IC, Dávalos DM, Ramirez O, Martínez E, et al. Effect of  
51 ivermectin on time to resolution of symptoms among adults with mild COVID-19: a randomized clinical  
52 trial. *Jama*. 2021;325(14):1426-35.  
53  
54  
55  
56  
57  
58  
59  
60



**Comparative-effectiveness research of COVID-19 treatment: A rapid scoping review**

312. López-Medrano F, Asín MAP-J, Fernández-Ruiz M, Carretero O, Lalueza A, de la Calle GM, et al. Combination therapy with tocilizumab and corticosteroids for aged patients with severe COVID-19 pneumonia: a single-center retrospective study. *International Journal of Infectious Diseases*. 2021;105:487-94.
313. López-Medrano F, Asín MAP-J, Fernández-Ruiz M, Carretero O, Lalueza A, de la Calle GM, et al. Combination therapy with tocilizumab and corticosteroids for aged patients with severe COVID-19 pneumonia: a single-center retrospective study. *International Journal of Infectious Diseases*. 2021;105:487-94.
314. Lotfy SM, Abbas A, Shouman W. Use of Hydroxychloroquine in patients with COVID-19: a retrospective observational study. *Turkish Thoracic Journal*. 2021;22(1):62.
315. Lou Y, Liu L, Yao H, Hu X, Su J, Xu K, et al. Clinical outcomes and plasma concentrations of baloxavir marboxil and favipiravir in COVID-19 patients: an exploratory randomized, controlled trial. *European Journal of Pharmaceutical Sciences*. 2021;157:105631.
316. Lu J, Zhou A, Zhang X, Xu H, Wang X, Ye Q, et al. Safety and efficacy of oral lopinavir/ritonavir in pediatric patients with coronavirus disease: a nationwide comparative analysis. *Eur Rev Med Pharmacol Sci*. 2021;25(1):549-55.
317. Lu X, Chen T, Wang Y, Wang J, Yan F. Adjuvant corticosteroid therapy for critically ill patients with COVID-19. *Critical Care*. 2020;24:1-4.
318. Lu Y, Liu F, Tong G, Qiu F, Song P, Wang X, et al. Clinical evidence of an interferon–glucocorticoid therapeutic synergy in COVID-19. *Signal transduction and targeted therapy*. 2021;6(1):1-11.
319. Luis B-M, Miguel M-B, Pedro D-L, David I-P, Itziar A, Ana G-H, et al. Benefits of early aggressive immunomodulatory therapy (tocilizumab and methylprednisolone) in COVID-19: single center cohort study of 685 patients. *Journal of translational autoimmunity*. 2021:100086.
320. Luis B-M, Miguel M-B, Pedro D-L, David I-P, Itziar A, Ana G-H, et al. Benefits of early aggressive immunomodulatory therapy (tocilizumab and methylprednisolone) in COVID-19: single center cohort study of 685 patients. *Journal of translational autoimmunity*. 2021:100086.
321. Lyngbakken MN, Berdal J-E, Eskesen A, Kvale D, Olsen IC, Rueegg CS, et al. A pragmatic randomized controlled trial reports lack of efficacy of hydroxychloroquine on coronavirus disease 2019 viral kinetics. *Nature communications*. 2020;11(1):1-6.
322. Lynn L, Reyes JA, Hawkins K, Panda A, Linville L, Aldhahri W, et al. The effect of anticoagulation on clinical outcomes in novel Coronavirus (COVID-19) pneumonia in a US cohort. *Thrombosis research*. 2021;197:65-8.
323. Ma Q, Qi D, Deng X, Yuan G, Tian W, Cui Y, et al. Corticosteroid therapy for patients with severe novel Coronavirus disease 2019. *Eur Rev Med Pharmacol Sci*. 2020:8194-201.
324. Ma Y, Zeng H, Zhan Z, Lu H, Zeng Z, He C, et al. Corticosteroid use in the treatment of COVID-19: a multicenter retrospective study in hunan, China. *Frontiers in pharmacology*. 2020;11:1198.

**Comparative-effectiveness research of COVID-19 treatment: A rapid scoping review**

- 1  
2  
3 325. Magagnoli J, Narendran S, Pereira F, Cummings TH, Hardin JW, Sutton SS, et al. Outcomes of  
4 hydroxychloroquine usage in United States veterans hospitalized with Covid-19. *Med*. 2020;1(1):114-27.  
5 e3.  
6  
7 326. Magagnoli J, Narendran S, Pereira F, Cummings TH, Hardin JW, Sutton SS, et al. Outcomes of  
8 hydroxychloroquine usage in United States veterans hospitalized with Covid-19. *Med*. 2020;1(1):114-27.  
9 e3.  
10  
11 327. Mahajan L, AP Singh G. Clinical outcomes of using remdesivir in patients with moderate to  
12 severe COVID-19: A prospective randomised study. *Indian Journal of Anaesthesia*. 2021;65(Suppl  
13 1):S41.  
14  
15 328. Mahajan L, AP Singh G. Clinical outcomes of using remdesivir in patients with moderate to  
16 severe COVID-19: A prospective randomised study. *Indian Journal of Anaesthesia*. 2021;65(Suppl  
17 1):S41.  
18  
19 329. Mahapatra S, Rattan R, Mohanty C. Convalescent Plasma Therapy in the management of  
20 COVID-19 patients-The newer dimensions. *Transfusion Clinique et Biologique*. 2021.  
21  
22 330. Mahévas M, Tran V-T, Roumier M, Chabrol A, Paule R, Guillaud C, et al. Clinical efficacy of  
23 hydroxychloroquine in patients with covid-19 pneumonia who require oxygen: observational comparative  
24 study using routine care data. *Bmj*. 2020;369.  
25  
26 331. Mahmud R, Rahman MM, Alam I, Ahmed KGU, Kabir AH, Sayeed SJB, et al. Ivermectin in  
27 combination with doxycycline for treating COVID-19 symptoms: a randomized trial. *Journal of*  
28 *International Medical Research*. 2021;49(5):03000605211013550.  
29  
30 332. Majmundar M, Kansara T, Lenik JM, Park H, Ghosh K, Doshi R, et al. Efficacy of  
31 corticosteroids in non-intensive care unit patients with COVID-19 pneumonia from the New York  
32 Metropolitan region. *PloS one*. 2020;15(9):e0238827.  
33  
34 333. Maldonado V, Hernandez-Ramírez C, Oliva-Pérez EA, Sánchez-Martínez CO, Pimentel-  
35 González JF, Molina-Sánchez JR, et al. Pentoxifylline decreases serum LDH levels and increases  
36 lymphocyte count in COVID-19 patients: results from an external pilot study. *International*  
37 *Immunopharmacology*. 2021;90:107209.  
38  
39 334. Mallat J, Hamed F, Maher Balkis MAM, Mooty M, Malik A, Nusair A, et al.  
40 Hydroxychloroquine is associated with slower viral clearance in clinical COVID-19 patients with mild to  
41 moderate disease. *Medicine*. 2020;99(52).  
42  
43 335. Mancilla-Galindo J, Garcia-Mendez JO, Marquez-Sanchez J, Reyes-Casarrubias RE, Aguirre-  
44 Aguilar E, Rocha-Gonzalez HI, et al. Use of antivirals and antibiotics for COVID-19 in Mexico City: a  
45 real-world Multicenter Cohort Study. *MedRxiv*. 2020.  
46  
47 336. Mancilla-Galindo J, García-Méndez JÓ, Márquez-Sánchez J, Reyes-Casarrubias RE, Aguirre-  
48 Aguilar E, Rocha-González HI, et al. All-cause mortality among patients treated with repurposed  
49 antivirals and antibiotics for COVID-19 in Mexico City: A real-world observational study. *EXCLI*  
50 *journal*. 2021;20:199.  
51  
52 337. Manenti L, Maggiore U, Fiaccadori E, Meschi T, Antoni AD, Nouvenne A, et al. Reduced  
53 mortality in COVID-19 patients treated with colchicine: Results from a retrospective, observational study.  
54 *PloS one*. 2021;16(3):e0248276.  
55  
56  
57  
58  
59  
60

**Comparative-effectiveness research of COVID-19 treatment: A rapid scoping review**

338. Manosuthi W, Jeungsmarn S, Okada P, Suwanvattana P, Wongboot W, Thawornwan U, et al. Nasopharyngeal SARS-CoV-2 Viral Load Response among COVID-19 Patients Receiving Favipiravir. *Japanese Journal of Infectious Diseases*. 2021:JJID. 2020.827.
339. Mansour E, Palma AC, Ulaf RG, Ribeiro LC, Bernardes AF, Nunes TA, et al. Safety and Outcomes Associated with the Pharmacological Inhibition of the Kinin–Kallikrein System in Severe COVID-19. *Viruses*. 2021;13(2):309.
340. Marconi VC, Ramanan AV, de Bono S, Kartman CE, Krishnan V, Liao R, et al. Baricitinib plus standard of care for hospitalized adults with COVID-19. *medRxiv*. 2021.
341. Mareev VY, Orlova YA, Pavlikova E, Matskeplishvili S, Krasnova T, Malahov P, et al. Steroid pulse-therapy in patients With coronAVirus Pneumonia (COVID-19), sYstemic inFLammation And Risk of vEnous thRombosis and thromboembolism (WAYFARER Study). *Kardiologija*. 2020;60(6):15-29.
342. Mareev VY, Orlova YA, Plisyk A, Pavlikova E, Matskeplishvili S, Akopyan Z, et al. Results of open-label non-randomized comparative clinical trial:“Bromhexine and spironolactone for coronavirus infection requiring hospitalization (BISCUIT). *Kardiologija*. 2020;60(11):4-15.
343. Martinelli I, Ciavarella A, Abbattista M, Aliberti S, De Zan V, Folli C, et al. Increasing dosages of low-molecular-weight heparin in hospitalized patients with Covid-19. *Internal and emergency medicine*. 2021:1-7.
344. Martínez-Sanz J, Muriel A, Ron R, Herrera S, Pérez-Molina JA, Moreno S, et al. Effects of tocilizumab on mortality in hospitalized patients with COVID-19: a multicentre cohort study. *Clinical Microbiology and Infection*. 2021;27(2):238-43.
345. Martínez-Sanz J, Muriel A, Ron R, Herrera S, Pérez-Molina JA, Moreno S, et al. Effects of tocilizumab on mortality in hospitalized patients with COVID-19: a multicentre cohort study. *Clinical Microbiology and Infection*. 2021;27(2):238-43.
346. Martínez-Urbistondo D, Costa Segovia R, Suárez del Villar Carrero R, Risco Risco C, Villares Fernández P. Early combination of tocilizumab and corticosteroids: An upgrade in anti-inflammatory Therapy for severe coronavirus disease (COVID). *Clinical Infectious Diseases*. 2021;72(9):1682-3.
347. Masiá M, Fernández-González M, Padilla S, Ortega P, García JA, Agulló V, et al. Impact of interleukin-6 blockade with tocilizumab on SARS-CoV-2 viral kinetics and antibody responses in patients with COVID-19: A prospective cohort study. *EBioMedicine*. 2020;60:102999.
348. Mather JF, Seip RL, McKay RG. Impact of famotidine use on clinical outcomes of hospitalized patients with COVID-19. *The American journal of gastroenterology*. 2020.
349. Mazloomzadeh S, Khaleghparast S, Ghadrdoost B, Mousavizadeh M, Baay MR, Noohi F, et al. Effect of intermediate-dose vs standard-dose prophylactic anticoagulation on thrombotic events, extracorporeal membrane oxygenation treatment, or mortality among patients with COVID-19 admitted to the intensive care unit: the INSPIRATION randomized clinical trial. *Jama*. 2021;325(16):1620-30.
350. Mehboob R, Ahmad F, Qayyum A, Rana MA, Gilani SA, Tariq MA, et al. Aprepitant as a combinant with Dexamethasone reduces the inflammation via Neurokinin 1 Receptor Antagonism in severe to critical Covid-19 patients and potentiates respiratory recovery: A novel therapeutic approach. *medRxiv*. 2020.

**Comparative-effectiveness research of COVID-19 treatment: A rapid scoping review**

- 1  
2  
3 351. Mehta M, Purpura LJ, McConville TH, Neidell MJ, Anderson MR, Bernstein EJ, et al. What  
4 about tocilizumab? A retrospective study from a NYC Hospital during the COVID-19 outbreak. *PloS one*.  
5 2021;16(4):e0249349.  
6  
7 352. Mehta RM, Bansal S, Bysani S, Kalpakam H. A shorter symptom onset to remdesivir treatment  
8 (SORT) interval is associated with a lower mortality in moderate-to-severe COVID-19: A real-world  
9 analysis. *International Journal of Infectious Diseases*. 2021;106:71-7.  
10  
11 353. Mehta RM, Bansal S, Bysani S, Kalpakam H. A shorter symptom onset to remdesivir treatment  
12 (SORT) interval is associated with a lower mortality in moderate-to-severe COVID-19: A real-world  
13 analysis. *International Journal of Infectious Diseases*. 2021;106:71-7.  
14  
15 354. Meizlish ML, Goshua G, Liu Y, Fine R, Amin K, Chang E, et al. Intermediate- dose  
16 anticoagulation, aspirin, and in- hospital mortality in COVID- 19: A propensity score-  
17 matched analysis. *American journal of hematology*. 2021;96(4):471-9.  
18  
19 355. Memel ZN, Lee JJ, Foulkes AS, Chung RT, Thaweethai T, Bloom PP. Statins Are Associated  
20 with Improved 28-day Mortality in Patients Hospitalized with SARS-CoV-2 Infection. *medRxiv*. 2021.  
21  
22 356. Memel ZN, Lee JJ, Foulkes AS, Chung RT, Thaweethai T, Bloom PP. Statins Are Associated  
23 with Improved 28-day Mortality in Patients Hospitalized with SARS-CoV-2 Infection. *medRxiv*. 2021.  
24  
25 357. Méndez-Flores S, Priego-Ranero Á, Azamar-Llamas D, Olvera-Prado H, Rivas-Redondo KI,  
26 Ochoa-Hein E, et al. Effect of polymerized type I collagen in hyperinflammation of adult outpatients with  
27 symptomatic COVID-19: a double blind, randomised, placebo-controlled clinical trial. *medRxiv*. 2021.  
28  
29 358. Meng F, Xu R, Wang S, Xu Z, Zhang C, Li Y, et al. Human umbilical cord-derived mesenchymal  
30 stem cell therapy in patients with COVID-19: a phase 1 clinical trial. *Signal transduction and targeted  
31 therapy*. 2020;5(1):1-7.  
32  
33 359. Mennuni MG, Renda G, Grisafi L, Rognoni A, Colombo C, Lio V, et al. Clinical outcome with  
34 different doses of low-molecular-weight heparin in patients hospitalized for COVID-19. *Journal of  
35 Thrombosis and Thrombolysis*. 2021:1-9.  
36  
37 360. Menzella F, Fontana M, Salvarani C, Massari M, Ruggiero P, Scelfo C, et al. Efficacy of  
38 tocilizumab in patients with COVID-19 ARDS undergoing noninvasive ventilation. *Critical Care*.  
39 2020;24(1):1-9.  
40  
41 361. Mercurio NJ, Yen CF, Shim DJ, Maher TR, McCoy CM, Zimetbaum PJ, et al. Risk of QT interval  
42 prolongation associated with use of hydroxychloroquine with or without concomitant azithromycin  
43 among hospitalized patients testing positive for coronavirus disease 2019 (COVID-19). *JAMA  
44 cardiology*. 2020;5(9):1036-41.  
45  
46 362. Mesina FZ, Mangahas CG, Gatchalian EM, Ramos MSA, Torres RP. Use of Convalescent  
47 Plasma Therapy among Hospitalized Coronavirus Disease 2019 (COVID-19) Patients: A Single-Center  
48 Experience. *medRxiv*. 2021.  
49  
50 363. Mikulska M, Nicolini LA, Signori A, Di Biagio A, Sepulcri C, Russo C, et al. Tocilizumab and  
51 steroid treatment in patients with COVID-19 pneumonia. *Plos one*. 2020;15(8):e0237831.  
52  
53  
54  
55  
56  
57  
58  
59  
60

**Comparative-effectiveness research of COVID-19 treatment: A rapid scoping review**

364. Miller J, Bruen C, Schnaus M, Zhang J, Ali S, Lind A, et al. Auxora versus standard of care for the treatment of severe or critical COVID-19 pneumonia: results from a randomized controlled trial. *Critical Care*. 2020;24(1):1-9.
365. Milzman D, Waud K, Sommers D. 308: Army Medical PPE for COVID-19 Pandemic: Javits, New York City: 1200 Patients, 170 Providers, 0 Cases. *Critical Care Medicine*. 2021;49(1):141.
366. Mitjà O, Corbacho-Monné M, Ubals M, Tebe C, Peñafiel J, Tobias A, et al. Hydroxychloroquine for early treatment of adults with mild Covid-19: a randomized-controlled trial. *Clinical Infectious Diseases*. 2020.
367. Moll M, Zon RL, Sylvester KW, Rimsans J, Chen EC, Ghosh AJ, et al. Intermediate versus standard dose heparin prophylaxis in COVID-19 ICU patients: A propensity score-matched analysis. *Thrombosis Research*. 2021;203:57-60.
368. Monedero P, Gea A, Castro P, Candela-Toha AM, Hernández-Sanz ML, Arruti E, et al. Early corticosteroids are associated with lower mortality in critically ill patients with COVID-19: a cohort study. *Critical Care*. 2021;25(1):1-13.
369. Moni M, Madathil T, Sathyapalan D, Menon V, Gutjahr G, Edathadathil F, et al. A Feasibility Trial to Evaluate the Composite Efficacy of Inhaled Nitric Oxide in the Treatment of Covid 19 Pneumonia: Impact on Viral Load and Clinical Outcomes. *medRxiv*. 2021.
370. Monk PD, Marsden RJ, Tear VJ, Brookes J, Batten TN, Mankowski M, et al. Safety and efficacy of inhaled nebulised interferon beta-1a (SNG001) for treatment of SARS-CoV-2 infection: a randomised, double-blind, placebo-controlled, phase 2 trial. *The Lancet Respiratory Medicine*. 2021;9(2):196-206.
371. Monreal E, de la Maza SS, Natera-Villalba E, Beltrán-Corbellini Á, Rodríguez-Jorge F, Fernández-Velasco JI, et al. High versus standard doses of corticosteroids in severe COVID-19: a retrospective cohort study. *European Journal of Clinical Microbiology & Infectious Diseases*. 2021;40(4):761-9.
372. Moreno-García E, Rico V, Albiach L, Agüero D, Ambrosioni J, Bodro M, et al. Tocilizumab reduces the risk of ICU admission and mortality in patients with SARS-CoV-2 infection. *Revista Española de Quimioterapia*. 2021;34(3):238.
373. Moschini L, Loffi M, Regazzoni V, Di Tano G, Gherbesi E, Danzi GB. Effects on QT interval of hydroxychloroquine associated with ritonavir/darunavir or azithromycin in patients with SARS-CoV-2 infection. *Heart and vessels*. 2021;36(1):115-20.
374. Motta JK, Ogunnaike RO, Shah R, Stroever S, Cedeño HV, Thapa SK, et al. Clinical Outcomes With the Use of Prophylactic Versus Therapeutic Anticoagulation in Coronavirus Disease 2019. *Critical Care Explorations*. 2020;2(12).
375. Mughal MS, Kaur I, Kakadia M, Wang C, Alhashemi R, Salloum R, et al. Is there any additional benefit of multiple doses of tocilizumab in COVID-19 patients? *Cureus*. 2020;12(12).
376. Murai IH, Fernandes AL, Sales LP, Pinto AJ, Goessler KF, Duran CS, et al. Effect of Vitamin D3 Supplementation vs Placebo on Hospital Length of Stay in Patients with Severe COVID-19: A Multicenter, Double-blind, Randomized Controlled Trial. *medRxiv*. 2020.

**Comparative-effectiveness research of COVID-19 treatment: A rapid scoping review**

377. Murai IH, Fernandes AL, Sales LP, Pinto AJ, Goessler KF, Duran CS, et al. Effect of a single high dose of vitamin D3 on hospital length of stay in patients with moderate to severe COVID-19: a randomized clinical trial. *Jama*. 2021;325(11):1053-60.
378. Nadkarni GN, Lala A, Bagiella E, Chang HL, Moreno PR, Pujadas E, et al. Anticoagulation, bleeding, mortality, and pathology in hospitalized patients with COVID-19. *Journal of the American College of Cardiology*. 2020;76(16):1815-26.
379. Narain S, Stefanov DG, Chau AS, Weber AG, Marder G, Kaplan B, et al. Comparative survival analysis of immunomodulatory therapy for COVID-19 'cytokine storm': A retrospective observational cohort study. Northwell COVID-19 Research Consortium, Comparative Survival Analysis of Immunomodulatory Therapy for COVID-19 'Cytokine Storm': A Retrospective Observational Cohort Study (6/9/2020). 2020.
380. Narain S, Stefanov DG, Chau AS, Weber AG, Marder G, Kaplan B, et al. Comparative survival analysis of immunomodulatory therapy for coronavirus disease 2019 cytokine storm. *Chest*. 2021;159(3):933-48.
381. Negrut N, Codrean A, Hodisan I, Bungau S, Tit DM, Marin R, et al. Efficiency of antiviral treatment in COVID-19. *Experimental and Therapeutic Medicine*. 2021;21(6):1-7.
382. Nelson BC, Laracy J, Shoucri S, Dietz D, Zucker J, Patel N, et al. Clinical outcomes associated with methylprednisolone in mechanically ventilated patients with COVID-19. *Clinical Infectious Diseases*. 2021;72(9):e367-e72.
383. Niwas R, Garg M, lakshmi Nag V, Bhatia PK, Dutt N, Chauhan N, et al. Clinical outcome, viral response and safety profile of chloroquine in COVID-19 patients—initial experience. *Advances in respiratory medicine*. 2020;88(6):515-9.
384. Nojomi M, Yassin Z, Keyvani H, Makiani MJ, Roham M, Laali A, et al. Effect of Arbidol (Umifenovir) on COVID-19: a randomized controlled trial. *BMC infectious diseases*. 2020;20(1):1-10.
385. Nourian A, Khalili H, Ahmadinejad Z, Kouchak HE, Jafari S, Manshadi SAD, et al. Efficacy and safety of sofosbuvir/ledipasvir in treatment of patients with COVID-19; A randomized clinical trial. *Acta Bio Medica: Atenei Parmensis*. 2020;91(4).
386. Obata R, Maeda T, Do DR, Kuno T. Increased secondary infection in COVID-19 patients treated with steroids in New York City. *Japanese journal of infectious diseases*. 2020;10.
387. O'Donnell MR, Grinsztejn B, Cummings MJ, Justman JE, Lamb MR, Eckhardt CM, et al. A randomized double-blind controlled trial of convalescent plasma in adults with severe COVID-19. *The Journal of Clinical Investigation*. 2021.
388. Okoh AK, Bishburg E, Grinberg S, Nagarakanti S. Tocilizumab use in COVID-19-associated pneumonia. *Journal of medical virology*. 2021;93(2):1023-8.
389. Okumuş N, Demirtürk N, Çetinkaya RA, Güner R, Avcı İY, Orhan S, et al. Evaluation of the effectiveness and safety of adding ivermectin to treatment in severe COVID-19 patients. *BMC infectious diseases*. 2021;21(1):1-11.
390. Olender SA, Perez KK, Go AS, Balani B, Price-Haywood EG, Shah NS, et al. Remdesivir for severe COVID-19 versus a cohort receiving standard of care. *Clinical Infectious Diseases*. 2020.

**Comparative-effectiveness research of COVID-19 treatment: A rapid scoping review**

391. Omrani AS, Pathan SA, Thomas SA, Harris TR, Coyle PV, Thomas CE, et al. Randomized double-blinded placebo-controlled trial of hydroxychloroquine with or without azithromycin for virologic cure of non-severe Covid-19. *EClinicalMedicine*. 2020;29:100645.
392. Omrani AS, Zaqout A, Baiou A, Daghfal J, Elkum N, Alattar RA, et al. Convalescent plasma for the treatment of patients with severe coronavirus disease 2019: a preliminary report. *Journal of Medical Virology*. 2021;93(3):1678-86.
393. Ong SWX, Tan WYT, Chan YH, Fong SW, Renia L, Ng LF, et al. Safety and potential efficacy of cyclooxygenase- 2 inhibitors in coronavirus disease 2019. *Clinical & translational immunology*. 2020;9(7):e1159.
394. Ooi ST, Parthasarathy P, Lin Y, Nallakaruppan V, Ng S, Tan TC, et al. Adjunctive Corticosteroids for COVID-19: A Retrospective Cohort Study. *medRxiv*. 2020.
395. Ooi ST, Parthasarathy P, Lin Y, Nallakaruppan VDO, Ng S, Tan TC, et al., editors. Antivirals With Adjunctive Corticosteroids Prevent Clinical Progression of Early Coronavirus 2019 Pneumonia: A Retrospective Cohort Study. *Open Forum Infectious Diseases*; 2020: Oxford University Press US.
396. Owen RR, Qizilbash N, Diaz SV, Vazquez JMC, Pocock SJ. Making sense of non-randomized comparative treatment studies in times of Covid-19: A case study of tocilizumab. *medRxiv*. 2021.
397. Paccoud O, Tubach F, Baptiste A, Bleibtreu A, Hajage D, Monsel G, et al. Compassionate use of hydroxychloroquine in clinical practice for patients with mild to severe Covid-19 in a French university hospital. *Clinical Infectious Diseases*. 2020.
398. Padilla R, Arquette J, Mai Y, Singh G, Galang K, Liang E. Clinical Outcomes of COVID-19 Patients Treated with Convalescent Plasma or Remdesivir Alone and in Combination at a Community Hospital in California's Central Valley. *Journal of Pharmacy & Pharmaceutical Sciences*. 2021;24:210-9.
399. Padmanabhan U, Mukherjee S, Borse R, Joshi S, Deshmukh R. Phase II Clinical trial for Evaluation of BCG as potential therapy for COVID-19. *medRxiv*. 2020.
400. Panagopoulos P, Petrakis V, Panopoulou M, Trypsianis G, Penlioglou T, Pnevmatikos I, et al. Lopinavir/ritonavir as a third agent in the antiviral regimen for SARS-CoV-2 infection. *Journal of Chemotherapy*. 2021;33(3):193-7.
401. Pandit A, Bhalani N, Bhushan BS, Koradia P, Gargiya S, Bhomia V, et al. Efficacy and safety of pegylated interferon alfa-2b in moderate COVID-19: A phase II, randomized, controlled, open-label study. *International Journal of Infectious Diseases*. 2021;105:516-21.
402. Pang J, Xu F, Aondio G, Li Y, Fumagalli A, Lu M, et al. Efficacy and tolerability of bevacizumab in patients with severe Covid-19. *Nature communications*. 2021;12(1):1-10.
403. Paolisso P, Bergamaschi L, D'Angelo EC, Donati F, Giannella M, Tedeschi S, et al. Preliminary experience with low molecular weight heparin strategy in COVID-19 patients. *Frontiers in pharmacology*. 2020;11:1124.
404. Papamanoli A, Yoo J, Grewal P, Predun W, Hotelling J, Jacob R, et al. High- dose methylprednisolone in nonintubated patients with severe COVID- 19 pneumonia. *European journal of clinical investigation*. 2021;51(2):e13458.

## Comparative-effectiveness research of COVID-19 treatment: A rapid scoping review

405. Pappa V, Bouchla A, Terpos E, Thomopoulos TP, Rosati M, Stellas D, et al. A Phase II Study on the Use of Convalescent Plasma for the Treatment of Severe COVID-19-A Propensity Score-Matched Control Analysis. *Microorganisms*. 2021;9(4):806.
406. Pareja JFP, García-Caballero R, Rangel LS, Vázquez-Ronda MA, Franco SR, Jiménez GN, et al. Effectiveness of glucocorticoids in patients hospitalized for severe SARS-CoV-2 pneumonia. *Medicina Clínica (English Edition)*. 2021;156(5):221-8.
407. Pasquini Z, Montalti R, Temperoni C, Canovari B, Mancini M, Tempesta M, et al. Effectiveness of remdesivir in patients with COVID-19 under mechanical ventilation in an Italian ICU. *Journal of Antimicrobial Chemotherapy*. 2020;75(11):3359-65.
408. Patel J, Beishuizen A, Ruiz XB, Boughanmi H, Cahn A, Criner GJ, et al. A Randomized Trial of Otilimab in Severe COVID-19 Pneumonia (OSCAR). *medRxiv*. 2021.
409. Patel NG, Bhasin A, Feinglass JM, Belknap SM, Angarone MP, Cohen ER, et al. Clinical outcomes of hospitalized patients with COVID-19 on therapeutic anticoagulants. *medRxiv*. 2020.
410. Patel O, Chinni V, El- Khoury J, Perera M, Neto AS, McDonald C, et al. A pilot double- blind safety and feasibility randomized controlled trial of high- dose intravenous zinc in hospitalized COVID-19 patients. *Journal of medical virology*. 2021;93(5):3261-7.
411. Pavoni V, Giancesello L, Pazzi M, Stera C, Meconi T, Frigieri FC. Venous thromboembolism and bleeding in critically ill COVID-19 patients treated with higher than standard low molecular weight heparin doses and aspirin: a call to action. *Thrombosis research*. 2020;196:313-7.
412. Pawlowski C, Venkatakrisnan A, Kirkup C, Berner G, Puranik A, O'Horo JC, et al. Enoxaparin is associated with lower rates of mortality than unfractionated Heparin in hospitalized COVID-19 patients. *EClinicalMedicine*. 2021;33:100774.
413. Pedretti Z, Powell B, Hedrick T, Murray B, Fischer W. 197: Characterization of Cytokine Expression in Critically Ill Patients With COVID-19. *Critical Care Medicine*. 2021;49(1):84.
414. Pereda R, González D, Rivero HB, Rivero JC, Pérez A, Lopez LDR, et al. Therapeutic effectiveness of interferon alpha 2b treatment for COVID-19 patient recovery. *Journal of Interferon & Cytokine Research*. 2020;40(12):578-88.
415. Pereda R, González D, Rivero HB, Rivero JC, Pérez A, López LDR, et al. Therapeutic effectiveness of interferon- $\alpha$ 2b against COVID-19: the cuban experience. *Journal of Interferon & Cytokine Research*. 2020;40(9):438-42.
416. Pereira MR, Aversa MM, Farr MA, Miko BA, Aaron JG, Mohan S, et al. Tocilizumab for severe COVID- 19 in solid organ transplant recipients: a matched cohort study. *American Journal of Transplantation*. 2020;20(11):3198-205.
417. Perlin DS, Neil GA, Anderson C, Zafir-Lavie I, Roadcap L, Raines S, et al. CERC-002, a human anti-LIGHT mAb reduces respiratory failure and death in hospitalized COVID-19 ARDS patients. *medRxiv*. 2021.
418. Pesavento R, Ceccato D, Pasquetto G, Monticelli J, Leone L, Frigo A, et al. The hazard of (sub) therapeutic doses of anticoagulants in non- critically ill patients with Covid- 19: the Padua province experience. *Journal of Thrombosis and Haemostasis*. 2020;18(10):2629-35.



**Comparative-effectiveness research of COVID-19 treatment: A rapid scoping review**

- 1  
2  
3 419. Peters EJ, Collard D, Van Assen S, Beudel M, Bomers MK, Buijs J, et al. Outcomes of persons  
4 with coronavirus disease 2019 in hospitals with and without standard treatment with (hydroxy)  
5 chloroquine. *Clinical Microbiology and Infection*. 2021;27(2):264-8.  
6
- 7 420. Petrak RM, Skorodin NC, Van Hise NW, Fliegelman RM, Pinsky J, Didwania V, et al.  
8 Tocilizumab as a therapeutic agent for critically ill patients infected with sARS- CoV- 2. *Clinical and*  
9 *Translational Science*. 2020.  
10
- 11 421. Pettit NN, Nguyen CT, Mutlu GM, Wu D, Kimmig L, Pitrak D, et al. Late onset infectious  
12 complications and safety of tocilizumab in the management of COVID- 19. *Journal of Medical Virology*.  
13 2021;93(3):1459-64.  
14
- 15 422. Piniella-Ruiz E, Bellver-Álvarez MT, Mestre-Gómez B, Escolano-Fernández B, Vinat-Prado S,  
16 Cabezas-Olea R, et al. Impact of systemic corticosteroids on mortality in older adults with critical  
17 COVID-19 pneumonia. *The Journals of Gerontology: Series A*. 2021.  
18
- 19 423. Pisano E, Bonino C, Arena A, Montanari G, Cerbone F, Umbrello M, et al. Effect of different  
20 corticosteroid regimens on the outcome of patients with severe COVI19-related acute respiratory failure.  
21 *Intensive Care Medicine Experimental*. 2020.  
22
- 23 424. Piva S, DiBlasi RM, Slee AE, Jobe AH, Roccaro AM, Filippini M, et al. Surfactant therapy for  
24 COVID-19 related ARDS: a retrospective case–control pilot study. *Respiratory research*. 2021;22(1):1-8.  
25
- 26 425. Pontali E, Volpi S, Signori A, Antonucci G, Castellaneta M, Buzzi D, et al. Efficacy of early anti-  
27 inflammatory treatment with high doses of intravenous anakinra with or without glucocorticoids in  
28 patients with severe COVID-19 pneumonia. *Journal of Allergy and Clinical Immunology*.  
29 2021;147(4):1217-25.  
30
- 31 426. Potere N, Di Nisio M, Cibelli D, Scurti R, Frattari A, Porreca E, et al. Interleukin-6 receptor  
32 blockade with subcutaneous tocilizumab in severe COVID-19 pneumonia and hyperinflammation: a  
33 case–control study. *Annals of the Rheumatic Diseases*. 2021;80(2):1-2.  
34
- 35 427. Potere N, Di Nisio M, Rizzo G, La Vella M, Polilli E, Agostinone A, et al. Low-dose  
36 subcutaneous tocilizumab to prevent disease progression in patients with moderate COVID-19 pneumonia  
37 and hyperinflammation. *International Journal of Infectious Diseases*. 2020;100:421-4.  
38
- 39 428. Pott-Junior H, Paoliello MMB, Miguel AdQC, da Cunha AF, de Melo Freire CC, Neves FF, et al.  
40 Use of ivermectin in the treatment of Covid-19: A pilot trial. *Toxicology Reports*. 2021;8:505-10.  
41
- 42 429. Pouladzadeh M, Safdarian M, Eshghi P, Abolghasemi H, Sheibani B, Choghakabodi PM, et al. A  
43 randomized clinical trial evaluating the immunomodulatory effect of convalescent plasma on COVID-19-  
44 related cytokine storm. *Internal and emergency medicine*. 2021:1-11.  
45
- 46 430. Prandoni P, Cattelan AM, Carrozzi L, Leone L, Filippi L, De Gaudenzi E, et al. The hazard of  
47 fondaparinux in non-critically ill patients with COVID-19: Retrospective controlled study versus  
48 enoxaparin. *Thrombosis Research*. 2020;196:395-7.  
49
- 50 431. Qu J, Li GH, Wang JJ, He GF, Huang JJ, Chen Y, et al. Comparative effectiveness of  
51 Lopinavir/Ritonavir- based regimens in COVID- 19. *Clinical and Experimental Pharmacology and*  
52 *Physiology*. 2021;48(2):203-10.  
53  
54  
55  
56  
57  
58  
59  
60

**Comparative-effectiveness research of COVID-19 treatment: A rapid scoping review**

432. Rachman BE, Miatmoko A, Lardo S, Purnama YI, Laely M, Rochmad I, et al. A Randomized, Double-Blind, Multicenter Clinical Study Comparing the Efficacy and Safety of a Drug Combination of Lopinavir/Ritonavir-Azithromycin, Lopinavir/Ritonavir-Doxycycline, and Azithromycin-Hydroxychloroquine for Patients Diagnosed with Mild to Moderate COVID-19 Infections. *Biochemistry research international*. 2021;2021.
433. Rahman O, Trigonis RA, Craft MK, Kruer RM, Miller EM, Terry CL, et al. Corticosteroid Use in Severely Hypoxemic COVID-19 Patients: An observational cohort analysis of dosing patterns and outcomes in the early phase of the pandemic. *Medrxiv*. 2020.
434. Rahman O, Trigonis RA, Craft MK, Kruer RM, Miller EM, Terry CL, et al. Corticosteroid Use in Severely Hypoxemic COVID-19 Patients: An observational cohort analysis of dosing patterns and outcomes in the early phase of the pandemic. *Medrxiv*. 2020.
435. Rahmani H, Davoudi-Monfared E, Nourian A, Khalili H, Hajizadeh N, Jalalabadi NZ, et al. Interferon  $\beta$ -1b in treatment of severe COVID-19: a randomized clinical trial. *International immunopharmacology*. 2020;88:106903.
436. Rainwater-Lovett K, Redd JT, Stewart MA, Calles NE, Cuff T, Fang M, et al. Real-world Effect of Monoclonal Antibody Treatment in COVID-19 Patients in a Diverse Population in the United States. *medRxiv*. 2021.
437. Rajendram P, Sacha GL, Mehkri O, Wang X, Han X, Vachharajani V, et al. Tocilizumab in coronavirus disease 2019-related critical illness: a propensity matched analysis. *Critical care explorations*. 2021;3(1).
438. Rajter JC, Sherman MS, Fatteh N, Vogel F, Sacks J, Rajter J-J. Use of ivermectin is associated with lower mortality in hospitalized patients with coronavirus disease 2019: the ivermectin in COVID nineteen study. *Chest*. 2021;159(1):85-92.
439. Ramakrishnan S, Nicolau DV, Langford B, Mahdi M, Jeffers H, Mwasuku C, et al. Inhaled budesonide in the treatment of early COVID-19 illness: a randomised controlled trial. 2021.
440. Ramakrishnan S, Nicolau Jr DV, Langford B, Mahdi M, Jeffers H, Mwasuku C, et al. Inhaled budesonide in the treatment of early COVID-19 (STOIC): a phase 2, open-label, randomised controlled trial. *The Lancet Respiratory Medicine*. 2021.
441. Raman R, Bhagwan Barge V, Anil Kumar D, Dandu H, Rakesh Kartha R, Bafna V, et al. A Phase II Safety and Efficacy Study on Prognosis of Moderate Pneumonia in Coronavirus Disease 2019 Patients With Regular Intravenous Immunoglobulin Therapy. *The Journal of Infectious Diseases*. 2021;223(9):1538-43.
442. Ramireddy A, Chugh H, Reinier K, Ebinger J, Park E, Thompson M, et al. Experience with hydroxychloroquine and azithromycin in the coronavirus disease 2019 pandemic: implications for QT interval monitoring. *Journal of the American Heart Association*. 2020;9(12):e017144.
443. Ramiro S, Mostard RL, Magro-Checa C, Van Dongen CM, Dormans T, Buijs J, et al. Historically controlled comparison of glucocorticoids with or without tocilizumab versus supportive care only in patients with COVID-19-associated cytokine storm syndrome: results of the CHIC study. *Annals of the rheumatic diseases*. 2020;79(9):1143-51.

**Comparative-effectiveness research of COVID-19 treatment: A rapid scoping review**

444. Rana MA, Hashmi M, Qayyum A, Pervaiz R, Saleem M, Munir MF, et al. Comparison of efficacy of dexamethasone and methylprednisolone in improving PaO<sub>2</sub>/FiO<sub>2</sub> ratio among COVID-19 patients. *Cureus*. 2020;12(10).
445. Rangel LK, Shah P, Sicco KL, Caplan AS, Femia A. Chronic hydroxychloroquine therapy and COVID-19 outcomes: A retrospective case-control analysis. *Journal of the American Academy of Dermatology*. 2021;84(6):1769-72.
446. Ranjbar K, Moghadami M, Mirahmadizadeh A, Fallahi MJ, Khaloo V, Shahriarirad R, et al. Methylprednisolone or dexamethasone, which one is superior corticosteroid in the treatment of hospitalized COVID-19 patients: a triple-blinded randomized controlled trial. *BMC infectious diseases*. 2021;21(1):1-8.
447. Rashad A, Mousa S, Nafady-Hego H, Nafady A, Elgendy H. Short term survival of critically ill COVID-19 Egyptian patients on assisted ventilation treated by either Dexamethasone or Tocilizumab. *Scientific Reports*. 2021;11(1):1-7.
448. Rasheed AM, Fatak DF, Hashim HA, Maulood MF, Kabah KK, Abdulmir AS. The therapeutic potential of convalescent plasma therapy on treating critically-ill COVID-19 patients residing in respiratory care units in hospitals in Baghdad, Iraq. *medRxiv*. 2020.
449. Rashid RA, Zgair A, Al-Ani RM. Effect of nasal corticosteroid in the treatment of anosmia due to COVID-19: A randomised double-blind placebo-controlled study. *American Journal of Otolaryngology*. 2021;42(5):103033.
450. Rastogi A, Bhansali A, Khare N, Suri V, Yaddanapudi N, Sachdeva N, et al. Short term, high-dose vitamin D supplementation for COVID-19 disease: a randomised, placebo-controlled, study (SHADE study). *Postgraduate medical journal*. 2020.
451. Réa-Neto Á, Bernardelli RS, Câmara BMD, Reese FB, Queiroga MVO, Oliveira MC. An open-label randomized controlled trial evaluating the efficacy of chloroquine/hydroxychloroquine in severe COVID-19 patients. *Scientific reports*. 2021;11(1):1-10.
452. Reis G, Silva EAdSM, Silva DCM, Thabane L, Singh G, Park JJ, et al. Effect of Early Treatment With Hydroxychloroquine or Lopinavir and Ritonavir on Risk of Hospitalization Among Patients With COVID-19: The TOGETHER Randomized Clinical Trial. *JAMA network open*. 2021;4(4):e216468-e.
453. Ren L, Xu W, Overton JL, Yu S, Chiamvimonvat N, Thai PN. Assessment of Hydroxychloroquine and Chloroquine Safety Profiles-A Systematic Review and Meta-Analysis. *MedRxiv*. 2020.
454. Rentsch CT, Beckman JA, Tomlinson L, Gellad WF, Alcorn C, Kidwai-Khan F, et al. Early initiation of prophylactic anticoagulation for prevention of COVID-19 mortality: a nationwide cohort study of hospitalized patients in the United States. *medRxiv*. 2020.
455. Rentsch CT, Beckman JA, Tomlinson L, Gellad WF, Alcorn C, Kidwai-Khan F, et al. Early initiation of prophylactic anticoagulation for prevention of coronavirus disease 2019 mortality in patients admitted to hospital in the United States: cohort study. *Bmj*. 2021;372.
456. Rocco PR, Silva PL, Cruz FF, Melo-Junior MAC, Tierno PF, Moura MA, et al. Early use of nitazoxanide in mild Covid-19 disease: randomised, placebo-controlled trial. *European Respiratory Journal*. 2021;58(1).

## Comparative-effectiveness research of COVID-19 treatment: A rapid scoping review

- 1  
2  
3 457. Rodríguez-Baño J, Pachón J, Carratalà J, Ryan P, Jarrín I, Yllescas M, et al. Treatment with  
4 tocilizumab or corticosteroids for COVID-19 patients with hyperinflammatory state: a multicentre cohort  
5 study (SAM-COVID-19). *Clinical Microbiology and Infection*. 2021;27(2):244-52.  
6  
7 458. Rodriguez-Garcia JL, Sanchez-Nievas G, Arevalo-Serrano J, Garcia-Gomez C, Jimenez-Vizuet  
8 JM, Martinez-Alfaro E. Baricitinib improves respiratory function in patients treated with corticosteroids  
9 for SARS-CoV-2 pneumonia: an observational cohort study. *Rheumatology*. 2021;60(1):399-407.  
10  
11 459. Rodríguez-Molinero A, Pérez-López C, Gálvez-Barrón C, Miñarro A, Gullello EAR, Pérez IC, et  
12 al. Association between high-dose steroid therapy, respiratory function, and time to discharge in patients  
13 with COVID-19: Cohort study. *Medicina Clínica (English Edition)*. 2021;156(1):7-12.  
14  
15 460. Rodríguez-Molinero A, Pérez-López C, Gálvez-Barrón C, Miñarro A, Macho O, López GF, et al.  
16 Observational study of azithromycin in hospitalized patients with COVID-19. *PloS one*.  
17 2020;15(9):e0238681.  
18  
19 461. Rodríguez-Molinero A, Pérez-López C, Gálvez-Barrón C, Miñarro A, Macho O, López GF, et al.  
20 Matched cohort study on the efficacy of tocilizumab in patients with COVID-19. *One Health*.  
21 2021;12:100214.  
22  
23 462. Rogers R, Shehadeh F, Mylona EK, Rich J, Neill M, Touzard-Romo F, et al. Convalescent  
24 Plasma for Patients With Severe Coronavirus Disease 2019 (COVID-19): A Matched Cohort Study.  
25 *Clinical Infectious Diseases*. 2021;73(1):e208-e14.  
26  
27 463. Rojas-Marte G, Khalid M, Mukhtar O, Hashmi AT, Waheed MA, Ehrlich S, et al. Outcomes in  
28 patients with severe COVID-19 disease treated with tocilizumab: a case–controlled study. *QJM: An*  
29 *International Journal of Medicine*. 2020;113(8):546-50.  
30  
31 464. Roomi S, Ullah W, Ahmed F, Farooq S, Sadiq U, Chohan A, et al. Efficacy of  
32 hydroxychloroquine and tocilizumab in patients with COVID-19: single-center retrospective chart review.  
33 *Journal of medical Internet research*. 2020;22(9):e21758.  
34  
35 465. Roozbeh F, Saeedi M, Alizadeh-Navaei R, Hedayatizadeh-Omran A, Merat S, Wentzel H, et al.  
36 Sofosbuvir and daclatasvir for the treatment of COVID-19 outpatients: a double-blind, randomized  
37 controlled trial. *Journal of Antimicrobial Chemotherapy*. 2021;76(3):753-7.  
38  
39 466. Rosas IO, Bräu N, Waters M, Go RC, Hunter BD, Bhagani S, et al. Tocilizumab in hospitalized  
40 patients with severe Covid-19 pneumonia. *New England Journal of Medicine*. 2021;384(16):1503-16.  
41  
42 467. Rosas J, Liaño FP, Cantó ML, Barea JMC, Beser AR, Rabasa JTA, et al. Experience with the use  
43 of Baricitinib and tocilizumab monotherapy or combined, in patients with interstitial pneumonia  
44 secondary to coronavirus COVID19: a real-world study. *Reumatologia clinica*. 2020.  
45  
46 468. Rosenberg ES, Dufort EM, Udo T, Wilberschied LA, Kumar J, Tesoriero J, et al. Association of  
47 treatment with hydroxychloroquine or azithromycin with in-hospital mortality in patients with COVID-19  
48 in New York State. *Jama*. 2020;323(24):2493-502.  
49  
50 469. Rossi B, Nguyen LS, Zimmermann P, Boucenna F, Dubret L, Baucher L, et al. Effect of  
51 tocilizumab in hospitalized patients with severe COVID-19 pneumonia: a case-control cohort study.  
52 *Pharmaceuticals*. 2020;13(10):317.  
53  
54  
55  
56  
57  
58  
59  
60

**Comparative-effectiveness research of COVID-19 treatment: A rapid scoping review**

- 1  
2  
3 470. Rossotti R, Travi G, Ughi N, Corradin M, Baiguera C, Fumagalli R, et al. Safety and efficacy of  
4 anti-il6-receptor tocilizumab use in severe and critical patients affected by coronavirus disease 2019: a  
5 comparative analysis. *Journal of Infection*. 2020;81(4):e11-e7.  
6
- 7 471. Roumier M, Paule R, Vallée A, Rohmer J, Ballester M, Brun A-L, et al. Tocilizumab for severe  
8 worsening COVID-19 pneumonia: a propensity score analysis. *Journal of clinical immunology*.  
9 2021;41(2):303-14.  
10
- 11 472. Roy R, Pattadar C, Raj R, Agarwal N, Biswas B, Majhi PK, et al. Ivermectin as a potential  
12 treatment for mild to moderate COVID-19—a double blind randomized placebo-controlled trial. *MedRxiv*.  
13 2021.  
14
- 15 473. Roy-Vallejo E, Purificacion AS, Pena JDT, Moreno BS, Arnalich F, Blanco MJG, et al. Effect of  
16 in-hospital treatment with angiotensin-converting enzyme inhibitors and angiotensin II receptor blockers  
17 on mortality and complications in patients hospitalized for COVID-19: a large Spanish cohort study.  
18 *medRxiv*. 2021.  
19
- 20 474. Ruan X, Lu X, Wang K, Zhang B, Wang J, Li Y, et al. Liver injury after antiviral treatment of  
21 critically ill patients with COVID-19: a single-centered retrospective cohort study. *Ann Palliat Med*.  
22 2021:2429-38.  
23
- 24 475. Ruiz-Antorán B, Sancho-López A, Torres F, Moreno-Torres V, de Pablo-López I, García-López  
25 P, et al. Combination of tocilizumab and steroids to improve mortality in patients with severe COVID-19  
26 infection: a Spanish, multicenter, cohort study. *Infectious diseases and therapy*. 2021;10(1):347-62.  
27
- 28 476. Ruiz-Irastorza G, Pijoan J-I, Bereciartua E, Dunder S, Dominguez J, Garcia-Escudero P, et al.  
29 Second week methyl-prednisolone pulses improve prognosis in patients with severe coronavirus disease  
30 2019 pneumonia: An observational comparative study using routine care data. *PloS one*.  
31 2020;15(9):e0239401.  
32
- 33 477. Russo V, Bottino R, D'Andrea A, Silverio A, Di Maio M, Golino P, et al. Chronic Oral  
34 Anticoagulation and Clinical Outcome in Hospitalized COVID-19 Patients. *Cardiovascular drugs and  
35 therapy*. 2021:1-8.  
36
- 37 478. Russo V, Cardillo G, Viggiano GV, Mangiacapra S, Cavalli A, Fontanella A, et al. Fondaparinux  
38 use in patients with COVID-19: a preliminary multicenter real-world experience. *Journal of  
39 Cardiovascular Pharmacology*. 2020;76(4):369-71.  
40
- 41 479. Sadeghi A, Ali Asgari A, Norouzi A, Kheiri Z, Anushirvani A, Montazeri M, et al. Sofosbuvir  
42 and daclatasvir compared with standard of care in the treatment of patients admitted to hospital with  
43 moderate or severe coronavirus infection (COVID-19): a randomized controlled trial. *Journal of  
44 Antimicrobial Chemotherapy*. 2020;75(11):3379-85.  
45
- 46 480. Saggi SJ, Nath S, Culas R, Chittalae S, Burza A, Srinivasan M, et al. Early Experience With  
47 Methylprednisolone on SARS-CoV-2 Infection in the African American Population, a Retrospective  
48 Analysis. *Clinical Medicine Insights: Circulatory, Respiratory and Pulmonary Medicine*.  
49 2020;14:1179548420980699.  
50
- 51 481. Sakoulas G, Geriak M, Kullar R, Greenwood K, Habib M, Vyas A, et al. Intravenous  
52 Immunoglobulin (IVIg) significantly reduces respiratory morbidity in COVID-19 pneumonia: a  
53 prospective randomized trial. *medRxiv*. 2020.  
54  
55  
56  
57  
58  
59  
60

**Comparative-effectiveness research of COVID-19 treatment: A rapid scoping review**

- 1  
2  
3 482. Sakoulas G, Geriak M, Kullar R, Greenwood KL, Habib M, Vyas A, et al. Intravenous  
4 immunoglobulin plus methylprednisolone mitigate respiratory morbidity in coronavirus disease 2019.  
5 *Critical care explorations*. 2020;2(11).  
6
- 7 483. Salama C, Han J, Yau L, Reiss WG, Kramer B, Neidhart JD, et al. Tocilizumab in patients  
8 hospitalized with Covid-19 pneumonia. *New England Journal of Medicine*. 2021;384(1):20-30.  
9
- 10 484. Salazar E, Christensen PA, Graviss EA, Nguyen DT, Castillo B, Chen J, et al. Treatment of  
11 coronavirus disease 2019 patients with convalescent plasma reveals a signal of significantly decreased  
12 mortality. *The American journal of pathology*. 2020;190(11):2290-303.  
13
- 14 485. Salazar E, Christensen PA, Graviss EA, Ngyuen DT, Castillo B, Chen J, et al. Early transfusion  
15 of a large cohort of COVID-19 patients with high titer anti-SARS-CoV-2 spike protein IgG convalescent  
16 plasma confirms a signal of significantly decreased mortality. *medRxiv*. 2020.  
17
- 18 486. Salazar MR, González SE, Regairaz L, Ferrando NS, González Martínez VV, Carrera Ramos  
19 PM, et al. Risk factors for COVID-19 mortality: The effect of convalescent plasma administration. *Plos*  
20 *one*. 2021;16(4):e0250386.  
21
- 22 487. Salazar MR, Gonzalez SE, Regairaz L, Ferrando NS, Gonzalez V, Carrera PM, et al. Effect of  
23 convalescent plasma on mortality in patients with COVID-19 pneumonia. *medRxiv*. 2020.  
24
- 25 488. Saleemi SA, Alrajhi A, Alhajji M, Alfattani A, Albaiz F. Time to negative PCR from symptom  
26 onset in COVID-19 patients on Hydroxychloroquine and Azithromycin-A real world experience.  
27 *MedRxiv*. 2020.  
28
- 29 489. Saleh M, Gabriels J, Chang D, Soo Kim B, Mansoor A, Mahmood E, et al. Effect of chloroquine,  
30 hydroxychloroquine, and azithromycin on the corrected QT interval in patients with SARS-CoV-2  
31 infection. *Circulation: Arrhythmia and Electrophysiology*. 2020;13(6):e008662.  
32
- 33 490. Salton F, Confalonieri P, Meduri GU, Santus P, Harari S, Scala R, et al., editors. Prolonged low-  
34 dose methylprednisolone in patients with severe COVID-19 pneumonia. *Open forum infectious diseases*;  
35 2020: Oxford University Press US.  
36
- 37 491. Salvarani C, Dolci G, Massari M, Merlo DF, Cavuto S, Savoldi L, et al. Effect of tocilizumab vs  
38 standard care on clinical worsening in patients hospitalized with COVID-19 pneumonia: a randomized  
39 clinical trial. *JAMA internal medicine*. 2021;181(1):24-31.  
40
- 41 492. Salvati L, Occhipinti M, Gori L, Ciani L, Mazzoni A, Maggi L, et al. Pulmonary vascular  
42 improvement in severe COVID-19 patients treated with tocilizumab. *Immunology Letters*. 2020;228:122-  
43 8.  
44
- 45 493. Sammartino D, Jafri F, Cook B, La L, Kim H, Cardasis J, et al. Predictors for inpatient mortality  
46 during the first wave of the SARS-CoV-2 pandemic: A retrospective analysis. *PloS one*.  
47 2021;16(5):e0251262.  
48
- 49 494. Sandhu T, Tieng A, Chilimuri S, Franchin G. A case control study to evaluate the impact of  
50 colchicine on patients admitted to the hospital with moderate to severe COVID-19 infection. *Canadian*  
51 *Journal of Infectious Diseases and Medical Microbiology*. 2020;2020.  
52  
53  
54  
55  
56  
57  
58  
59  
60

**Comparative-effectiveness research of COVID-19 treatment: A rapid scoping review**

495. Sands K, Wenzel R, McLean L, Korwek K, Roach J, Miller K, et al. No clinical benefit in mortality associated with hydroxychloroquine treatment in patients with COVID-19. *International Journal of Infectious Diseases*. 2021;104:34-40.
496. Santoro F, Núñez-Gil IJ, Viana-Llamas MC, Maroun Eid C, Romero R, Fernández Rozas I, et al. Anticoagulation Therapy in Patients With Coronavirus Disease 2019: Results From a Multicenter International Prospective Registry (Health Outcome Predictive Evaluation for Corona Virus Disease 2019 [HOPE-COVID19]). *Critical Care Medicine*. 2021;49(6):e624-e33.
497. Sarayani A, Cicali B, Henriksen CH, Brown JD. Safety signals for QT prolongation or Torsades de Pointes associated with azithromycin with or without chloroquine or hydroxychloroquine. *Research in Social and Administrative Pharmacy*. 2021;17(2):483-6.
498. Sayed AM, Khalaf AM, Abdelrahim ME, Elgendy MO. Repurposing of some anti-infective drugs for COVID-19 treatment: A surveillance study supported by an in silico investigation. *International Journal of Clinical Practice*. 2021;75(4):e13877.
499. Sbidian E, Josse J, Lemaitre G, Mayer I, Bernaux M, Gramfort A, et al. Hydroxychloroquine with or without azithromycin and in-hospital mortality or discharge in patients hospitalized for COVID-19 infection: a cohort study of 4,642 in-patients in France. *MedRxiv*. 2020.
500. Scarsi M, Piantoni S, Colombo E, Airó P, Richini D, Miclini M, et al. Association between treatment with colchicine and improved survival in a single-centre cohort of adult hospitalised patients with COVID-19 pneumonia and acute respiratory distress syndrome. *Annals of the rheumatic diseases*. 2020;79(10):1286-9.
501. Schneider J, Jaenigen B, Wagner D, Rieg S, Hornuss D, Biever PM, et al. Therapy with lopinavir/ritonavir and hydroxychloroquine is associated with acute kidney injury in COVID-19 patients. *Plos one*. 2021;16(5):e0249760.
502. Schooling C, Yeung SA, Kwok M, Zhao J. Genetic validation of the use of tocilizumab, statins and dexamethasone in COVID-19. *medRxiv*. 2020.
503. Sekhavati E, Jafari F, SeyedAlinaghi S, Jamalimoghadasiahkali S, Sadr S, Tabarestani M, et al. Safety and effectiveness of azithromycin in patients with COVID-19: an open-label randomised trial. *International journal of antimicrobial agents*. 2020;56(4):106143.
504. Self WH, Semler MW, Leither LM, Casey JD, Angus DC, Brower RG, et al. Effect of hydroxychloroquine on clinical status at 14 days in hospitalized patients with COVID-19: a randomized clinical trial. *Jama*. 2020;324(21):2165-76.
505. Sevilla-Castillo F, Roque-Reyes OJ, Romero-Lechuga F, Gómez-Núñez MF, Castillo-López M, Medina-Santos D, et al. Both Chloroquine and Lopinavir/Ritonavir Are Ineffective for COVID-19 Treatment and Combined Worsen the Pathology: A Single-Center Experience with Severely Ill Patients. *BioMed Research International*. 2021;2021.
506. Seyhan AU, Doganay F, Yilmaz E, Topal NP, Ak R. Investigation of QT prolongation with hydroxychloroquine and azithromycin for the treatment of COVID-19. *Journal of the College of Physicians and Surgeons Pakistan*. 2020;30(10S1):S153-S.

**Comparative-effectiveness research of COVID-19 treatment: A rapid scoping review**

507. Shao Z, Feng Y, Zhong L, Xie Q, Lei M, Liu Z, et al. Clinical efficacy of intravenous immunoglobulin therapy in critical ill patients with COVID- 19: a multicenter retrospective cohort study. *Clinical & translational immunology*. 2020;9(10):e1192.
508. Shen L, Qiu L, Liu D, Wang L, Huang H, Ge H, et al. The association of low molecular weight heparin use and in-hospital mortality among patients hospitalized with COVID-19. *Cardiovascular Drugs and Therapy*. 2021:1-8.
509. Shenoy AG, Hettinger AZ, Fernandez SJ, Blumenthal J, Baez V. Early mortality benefit with COVID- 19 convalescent plasma: a matched control study. *British journal of haematology*. 2021;192(4):706-13.
510. Shi C, Wang C, Wang H, Yang C, Cai F, Zeng F, et al. The potential of low molecular weight heparin to mitigate cytokine storm in severe COVID- 19 patients: a retrospective cohort study. *Clinical and translational science*. 2020;13(6):1087-95.
511. Shi L, Huang H, Lu X, Yan X, Jiang X, Xu R, et al. Effect of human umbilical cord-derived mesenchymal stem cells on lung damage in severe COVID-19 patients: a randomized, double-blind, placebo-controlled phase 2 trial. *Signal transduction and targeted therapy*. 2021;6(1):1-9.
512. Shi L, Huang H, Lu X, Yan X, Jiang X, Xu R, et al. Effect of human umbilical cord-derived mesenchymal stem cells on lung damage in severe COVID-19 patients: a randomized, double-blind, placebo-controlled phase 2 trial. *Signal transduction and targeted therapy*. 2021;6(1):1-9.
513. Shoaibi A, Fortin SP, Weinstein R, Berlin JA, Ryan P. Comparative effectiveness of famotidine in hospitalized COVID-19 patients. *Official journal of the American College of Gastroenterology| ACG*. 2021;116(4):692-9.
514. Shu L, Niu C, Li R, Huang T, Wang Y, Huang M, et al. Treatment of severe COVID-19 with human umbilical cord mesenchymal stem cells. *Stem cell research & therapy*. 2020;11(1):1-11.
515. Siami Z, Aghajanian S, Mansouri S, Mokhames Z, Pakzad R, Kabir K, et al. Effect of Ammonium Chloride in addition to standard of care in outpatients and hospitalized COVID-19 patients: a randomized clinical trial. *International Journal of Infectious Diseases*. 2021;108:306-8.
516. Silva M, Espejo A, Pereyra ML, Lynch M, Thompson M, Taconelli H, et al. Efficacy of Nitazoxanide in reducing the viral load in COVID-19 patients. Randomized, placebo-controlled, single-blinded, parallel group, pilot study. *medRxiv*. 2021.
517. Simonovich VA, Burgos Pratz LD, Scibona P, Beruto MV, Vallone MG, Vázquez C, et al. A randomized trial of convalescent plasma in Covid-19 severe pneumonia. *New England Journal of Medicine*. 2021;384(7):619-29.
518. Singh AK, Singh A, Singh R, Misra A. Remdesivir in COVID-19: a critical review of pharmacology, pre-clinical and clinical studies. *Diabetes & Metabolic Syndrome: Clinical Research & Reviews*. 2020;14(4):641-8.
519. Singh S, John T, Kumar P, Quadery SR. The impact of high dose oral cotrimoxazole in patients with COVID-19 with hypoxic respiratory failure requiring non-invasive ventilation: A Case Control Study. *medRxiv*. 2021.



**Comparative-effectiveness research of COVID-19 treatment: A rapid scoping review**

520. Singh S, Khan A, Chowdhry M, Chatterjee A. Outcomes of hydroxychloroquine treatment among hospitalized COVID-19 patients in the United States-real-world evidence from a federated electronic medical record network. *MedRxiv*. 2020.
521. Sinha P, Jafarzadeh SR, Assoumou SA, Bielick CG, Carpenter B, Garg S, et al. The effect of IL-6 inhibitors on mortality among hospitalized COVID-19 patients: a multicenter study. *The Journal of infectious diseases*. 2021;223(4):581-8.
522. Sinha P, Mostaghim A, Bielick CG, McLaughlin A, Hamer DH, Wetzler LM, et al. Early administration of interleukin-6 inhibitors for patients with severe COVID-19 disease is associated with decreased intubation, reduced mortality, and increased discharge. *International Journal of Infectious Diseases*. 2020;99:28-33.
523. Sinkeler F, Berger F, Muntinga H, Jansen M. The risk of QTc-interval prolongation in COVID-19 patients treated with chloroquine. *Netherlands Heart Journal*. 2020;28(7):418-23.
524. Sivaloganathan H, Ladikou EE, Chevassut T. COVID-19 mortality in patients on anticoagulants and antiplatelet agents. *British journal of haematology*. 2020.
525. Sivapalasingam S, Lederer D, Bhore R, Hajizadeh N, Criner G, Hossain R, et al. A Randomized Placebo-Controlled Trial of Sarilumab in Hospitalized Patients with Covid-19. *medRxiv*. 2021.
526. Skipper CP, Pastick KA, Engen NW, Bangdiwala AS, Abassi M, Lofgren SM, et al. Hydroxychloroquine in nonhospitalized adults with early COVID-19: a randomized trial. *Annals of internal medicine*. 2020;173(8):623-31.
527. Soin AS, Kumar K, Choudhary NS, Sharma P, Mehta Y, Kataria S, et al. Tocilizumab plus standard care versus standard care in patients in India with moderate to severe COVID-19-associated cytokine release syndrome (COVINTOC): an open-label, multicentre, randomised, controlled, phase 3 trial. *The Lancet Respiratory Medicine*. 2021;9(5):511-21.
528. Solaymani-Dodaran M, Ghanei M, Bagheri M, Qazvini A, Vahedi E, Saadat SH, et al. Safety and efficacy of Favipiravir in moderate to severe SARS-CoV-2 pneumonia. *International Immunopharmacology*. 2021;95:107522.
529. Somers EC, Eschenauer GA, Troost JP, Golob JL, Gandhi TN, Wang L, et al. Tocilizumab for treatment of mechanically ventilated patients with COVID-19. *Clinical Infectious Diseases*. 2021;73(2):e445-e54.
530. Sostin OV, Rajapakse P, Crusier B, Wakefield D, Crusier D, Petrini J. A matched cohort study of convalescent plasma therapy for COVID-19. *Journal of clinical apheresis*. 2021.
531. Soto-Becerra P, Culquichicón C, Hurtado-Roca Y, Araujo-Castillo RV. Real-world effectiveness of hydroxychloroquine, azithromycin, and ivermectin among hospitalized COVID-19 patients: results of a target trial emulation using observational data from a nationwide healthcare system in Peru. *Azithromycin, and Ivermectin Among Hospitalized COVID-19 Patients: Results of a Target Trial Emulation Using Observational Data from a Nationwide Healthcare System in Peru*. 2020.
532. Spagnuolo V, Guffanti M, Galli L, Poli A, Querini PR, Ripa M, et al. Viral clearance after early corticosteroid treatment in patients with moderate or severe covid-19. *Scientific Reports*. 2020;10(1):1-7.

## Comparative-effectiveness research of COVID-19 treatment: A rapid scoping review

533. Spinner CD, Gottlieb RL, Criner GJ, López JRA, Cattelan AM, Viladomiu AS, et al. Effect of remdesivir vs standard care on clinical status at 11 days in patients with moderate COVID-19: a randomized clinical trial. *Jama*. 2020;324(11):1048-57.
534. Spinner CD, Gottlieb RL, Criner GJ, López JRA, Cattelan AM, Viladomiu AS, et al. Effect of remdesivir vs standard care on clinical status at 11 days in patients with moderate COVID-19: a randomized clinical trial. *Jama*. 2020;324(11):1048-57.
535. Stanevich OV, Fomina DS, Bakulin IG, Galeev SI, Bakin EA, Belash VA, et al. Ruxolitinib Versus Dexamethasone in Hospitalized Adults With COVID-19: Multicenter Matched Cohort Study. 2021.
536. Stewart M, Rodriguez-Watson C, Albayrak A, Asubonteng J, Belli A, Brown T, et al. COVID-19 Evidence Accelerator: A parallel analysis to describe the use of Hydroxychloroquine with or without Azithromycin among hospitalized COVID-19 patients. *Plos one*. 2021;16(3):e0248128.
537. Stone JH, Frigault MJ, Serling-Boyd NJ, Fernandes AD, Harvey L, Foulkes AS, et al. Efficacy of tocilizumab in patients hospitalized with Covid-19. *New England Journal of Medicine*. 2020;383(24):2333-44.
538. Stone JH, Frigault MJ, Serling-Boyd NJ, Fernandes AD, Harvey L, Foulkes AS, et al. Efficacy of tocilizumab in patients hospitalized with Covid-19. *New England Journal of Medicine*. 2020;383(24):2333-44.
539. Strohbehn GW, Heiss BL, Rouhani SJ, Trujillo JA, Yu J, Kacew AJ, et al. COVIDOSE: Low-dose tocilizumab in the treatment of Covid-19. *medRxiv*. 2020.
540. Strohbehn GW, Heiss BL, Rouhani SJ, Trujillo JA, Yu J, Kacew AJ, et al. COVIDOSE: Low-dose tocilizumab in the treatment of Covid-19. *medRxiv*. 2020.
541. Strohbehn GW, Heiss BL, Rouhani SJ, Trujillo JA, Yu J, Kacew AJ, et al. COVIDOSE: Low-dose tocilizumab in the treatment of Covid-19. *medRxiv*. 2020.
542. Sturek JM, Thomas TA, Gorham JD, Sheppard CA, Raymond AE, De Guex KP, et al. Convalescent plasma for preventing critical illness in COVID-19: A phase 2 trial and immune profile. *medRxiv*. 2021.
543. Su Y, Ling Y, Ma Y, Tao L, Miao Q, Shi Q, et al. Efficacy of early hydroxychloroquine treatment in preventing COVID-19 pneumonia aggravation, the experience from Shanghai, China. *Bioscience trends*. 2020;14(6):408-14.
544. Sulaiman T, Mohana A, Alawdah L, Mahmoud N, Hassanein M, Wani T, et al. The effect of early hydroxychloroquine-based therapy in COVID-19 patients in ambulatory care settings: a nationwide prospective cohort study. *medRxiv*. 2020.
545. Sun Q, Xie J, Zheng R, Li X, Chen H, Tong Z, et al. The effect of thymosin  $\alpha$ 1 on mortality of critical COVID-19 patients: A multicenter retrospective study. *International Immunopharmacology*. 2021;90:107143.
546. Tabarsi P, Barati S, Jamaati H, Haseli S, Marjani M, Moniri A, et al. Evaluating the effects of intravenous immunoglobulin (IVIg) on the management of severe COVID-19 cases: a randomized controlled trial. *International immunopharmacology*. 2021;90:107205.

## Comparative-effectiveness research of COVID-19 treatment: A rapid scoping review

547. Taccone FS, Gevenois PA, Peluso L, Pletchette Z, Lheureux O, Brasseur A, et al. Higher intensity thromboprophylaxis regimens and pulmonary embolism in critically ill coronavirus disease 2019 patients. *Critical care medicine*. 2020.

548. Tacquard C, Mansour A, Godon A, Godet J, Poissy J, Garrigue D, et al. Impact of high-dose prophylactic anticoagulation in critically ill patients with coronavirus disease 2019 pneumonia. *Chest*. 2021.

549. Tan CW, Ho LP, Kalimuddin S, Cherng BPZ, Teh YE, Thien SY, et al. Cohort study to evaluate the effect of vitamin D, magnesium, and vitamin B<sub>12</sub> in combination on progression to severe outcomes in older patients with coronavirus (COVID-19).

550. Tang W, Cao Z, Han M, Wang Z, Chen J, Sun W, et al. Hydroxychloroquine in patients with mainly mild to moderate coronavirus disease 2019: open label, randomised controlled trial. *bmj*. 2020;369.

551. Tang X, Feng Y-M, Ni J-X, Zhang J-Y, Liu L-M, Hu K, et al. Early use of corticosteroid may prolong SARS-CoV-2 shedding in non-intensive care unit patients with COVID-19 pneumonia: a multicenter, single-blind, randomized control trial. *Respiration*. 2021;100(2):116-26.

552. Temesgen Z, Assi M, Shweta F, Vergidis P, Rizza SA, Bauer PR, et al., editors. GM-CSF neutralization with lenzilumab in severe COVID-19 pneumonia: a case-cohort study. *Mayo Clinic Proceedings*; 2020: Elsevier.

553. Temesgen Z, Burger CD, Baker J, Polk C, Libertin C, Kelley C, et al. LENZILUMAB EFFICACY AND SAFETY IN NEWLY HOSPITALIZED COVID-19 SUBJECTS: RESULTS FROM THE LIVE-AIR PHASE 3 RANDOMIZED DOUBLE-BLIND PLACEBO-CONTROLLED TRIAL. *medRxiv*. 2021.

554. Temesgen Z, Burger CD, Baker J, Polk C, Libertin C, Kelley C, et al. LENZILUMAB EFFICACY AND SAFETY IN NEWLY HOSPITALIZED COVID-19 SUBJECTS: RESULTS FROM THE LIVE-AIR PHASE 3 RANDOMIZED DOUBLE-BLIND PLACEBO-CONTROLLED TRIAL. *medRxiv*. 2021.

555. Thakar A, Panda S, Sakthivel P, Brijwal M, Dhakad S, Choudekar A, et al. Chloroquine nasal drops in asymptomatic & mild COVID-19: An exploratory randomized clinical trial. *The Indian journal of medical research*. 2021;153(1-2):151.

556. Tharaux P-L, Pialoux G, Pavot A, Mariette X, Hermine O, Resche-Rigon M, et al. Effect of anakinra versus usual care in adults in hospital with COVID-19 and mild-to-moderate pneumonia (CORIMUNO-ANA-1): a randomised controlled trial. *The Lancet Respiratory Medicine*. 2021;9(3):295-304.

557. Thomas S, Patel D, Bittel B, Wolski K, Wang Q, Kumar A, et al. Effect of high-dose zinc and ascorbic acid supplementation vs usual care on symptom length and reduction among ambulatory patients with SARS-CoV-2 infection: the COVID A to Z randomized clinical trial. *JAMA network open*. 2021;4(2):e210369-e.

558. Thomas S, Patel D, Bittel B, Wolski K, Wang Q, Kumar A, et al. Effect of high-dose zinc and ascorbic acid supplementation vs usual care on symptom length and reduction among ambulatory patients with SARS-CoV-2 infection: the COVID A to Z randomized clinical trial. *JAMA network open*. 2021;4(2):e210369-e.

**Comparative-effectiveness research of COVID-19 treatment: A rapid scoping review**

559. Thompson MA, Henderson JP, Shah PK, Rubinstein SM, Joyner MJ, Choueiri TK, et al. Convalescent plasma and improved survival in patients with hematologic malignancies and COVID-19. medRxiv. 2021.
560. Tian J, Zhang M, Jin M, Zhang F, Chu Q, Wang X, et al. Repurposed tocilizumab in patients with severe COVID-19. *The Journal of Immunology*. 2021;206(3):599-606.
561. Tolouian R, Mulla ZD, Jamaati H, Babamahmoodi A, Marjani M, Eskandari R, et al. Effect of bromhexine in hospitalized patients with COVID-19. *Journal of Investigative Medicine*. 2021.
562. Tomazini BM, Maia IS, Cavalcanti AB, Berwanger O, Rosa RG, Veiga VC, et al. Effect of dexamethasone on days alive and ventilator-free in patients with moderate or severe acute respiratory distress syndrome and COVID-19: the CoDEX randomized clinical trial. *Jama*. 2020;324(13):1307-16.
563. Tong S, Su Y, Yu Y, Wu C, Chen J, Wang S, et al. Ribavirin therapy for severe COVID-19: a retrospective cohort study. *International journal of antimicrobial agents*. 2020;56(3):106114.
564. Tortajada C, Colomer E, Andreu- Ballester JC, Esparcia A, Oltra C, Flores J. Corticosteroids for COVID- 19 patients requiring oxygen support? Yes, but not for everyone: Effect of corticosteroids on mortality and intensive care unit admission in patients with COVID- 19 according to patients' oxygen requirements. *Journal of Medical Virology*. 2021;93(3):1817-23.
565. Touafchia A, Bagheri H, Carrié D, Durrieu G, Sommet A, Chouchana L, et al. Serious bradycardia and remdesivir for coronavirus 2019 (COVID-19): a new safety concerns. *Clinical Microbiology and Infection*. 2021;27(5):791. e5-. e8.
566. Tran V-T, Mahévas M, Bani-Sadr F, Robineau O, Perpoint T, Perrodeau E, et al. Corticosteroids in patients hospitalized for COVID-19 pneumonia who require oxygen: observational comparative study using routine care data. *Clinical Microbiology and Infection*. 2021;27(4):603-10.
567. Tran V-T, Mahevas M, Sadr FB, Robineau O, Perpoint T, Perrodeau E, et al. Association between corticosteroids and intubation or death among patients with COVID-19 pneumonia in non-ICU settings: an observational study using of real-world data from 51 hospitals in France and Luxembourg. medRxiv. 2020.
568. Trinh M, Chang DR, Govindarajulu US, Kane E, Fuster V, Kohli-Seth R, et al. Therapeutic anticoagulation is associated with decreased mortality in mechanically ventilated COVID-19 patients. medRxiv. 2020.
569. Tsai A, Diawara O, Nahass RG, Brunetti L. Impact of tocilizumab administration on mortality in severe COVID-19. *Scientific reports*. 2020;10(1):1-7.
570. Tsiakos K, Tsakiris A, Tsibris G, Voutsinas P, Panagopoulos P, Kosmidou M, et al. Oral clarithromycin in COVID-19 of moderate severity: the ACHIEVE open-label trial using concurrent matched comparators. medRxiv. 2020.
571. Tworek A, Jaroń K, Uszyńska-Kaluża B, Rydzewski A, Gil R, Deptała A, et al. Convalescent plasma treatment is associated with lower mortality and better outcomes in high-risk COVID-19 patients—propensity-score matched case-control study. *International Journal of Infectious Diseases*. 2021;105:209-15.

**Comparative-effectiveness research of COVID-19 treatment: A rapid scoping review**

572. Udhwadia ZF, Singh P, Barkate H, Patil S, Rangwala S, Pendse A, et al. Efficacy and safety of favipiravir, an oral RNA-dependent RNA polymerase inhibitor, in mild-to-moderate COVID-19: A randomized, comparative, open-label, multicenter, phase 3 clinical trial. *International Journal of Infectious Diseases*. 2021;103:62-71.

573. Ulrich RJ, Troxel AB, Carmody E, Eapen J, Bäcker M, DeHovitz JA, et al., editors. Treating COVID-19 with hydroxychloroquine (TEACH): a multicenter, double-blind randomized controlled trial in hospitalized patients. *Open forum infectious diseases*; 2020: Oxford University Press US.

574. Vahedi E, Ghanei M, Ghazvini A, Azadi H, Izadi M, Panahi Y, et al. The clinical value of two combination regimens in the Management of Patients Suffering from Covid-19 pneumonia: a single centered, retrospective, observational study. *DARU Journal of Pharmaceutical Sciences*. 2020;28(2):507-16.

575. Vaira LA, Hopkins C, Petrocelli M, Lechien JR, Cutrupi S, Salzano G, et al. Efficacy of corticosteroid therapy in the treatment of long-lasting olfactory disorders in COVID-19 patients. *Rhinology*. 2020.

576. Valerio Pascua F, Diaz O, Medina R, Contreras B, Mistroff J, Espinosa D, et al. A multi-mechanism approach reduces length of stay in the ICU for severe COVID-19 patients. *PloS one*. 2021;16(1):e0245025.

577. Van den Eynde E, Gasch O, Oliva J, Prieto E, Calzado S, Gomila A, et al. Corticosteroids and tocilizumab reduce in-hospital mortality in severe COVID-19 pneumonia: a retrospective study in a Spanish hospital. *Infectious Diseases*. 2021;53(4):291-302.

578. Vasylyeva O, Chen T, Hanna J. Remdesivir for COVID-19: match-population analysis with compassionate use of Remdesivir for severe COVID-19. *medRxiv*. 2020.

579. Veiga VC, Prats JA, Farias DL, Rosa RG, Dourado LK, Zampieri FG, et al. Effect of tocilizumab on clinical outcomes at 15 days in patients with severe or critical coronavirus disease 2019: randomised controlled trial. *Bmj*. 2021;372.

580. Vernaz-Hegi N, Agoritsas T, Calmy A, Gayet-Ageron A, Gold G, Perrier A, et al. Early experimental COVID-19 therapies: associations with length of hospital stay, mortality and related costs. *Swiss Medical Weekly*. 2020;150:w20446.

581. Vlaar AP, de Bruin S, Busch M, Timmermans SA, van Zeggeren IE, Koning R, et al. Anti-C5a antibody IFX-1 (vilobelimab) treatment versus best supportive care for patients with severe COVID-19 (PANAMO): an exploratory, open-label, phase 2 randomised controlled trial. *The Lancet Rheumatology*. 2020;2(12):e764-e73.

582. Wadud N, Ahmed N, Shergil MM, Khan M, Krishna MG, Gilani A, et al. Improved survival outcome in SARs-CoV-2 (COVID-19) acute respiratory distress syndrome patients with tocilizumab administration. *medRxiv*. 2020.

583. Wadud N, Ahmed N, Shergill M, Khan M, Krishna M, Gilani A, et al. 151: Does Tocilizumab Improve Survival Outcome in COVID-19 Acute Respiratory Distress Syndrome Patients? *Critical Care Medicine*. 2021;49(1):61.

**Comparative-effectiveness research of COVID-19 treatment: A rapid scoping review**

- 1  
2  
3 584. Wall GC, Smith HL, Trump MW, Mohr JD, DuMontier SP, Sabates BL, et al. Pentoxifylline or  
4 theophylline use in hospitalized COVID- 19 patients requiring oxygen support. *The Clinical Respiratory*  
5 *Journal*. 2021.
- 6  
7 585. Wang B, Li D, Liu T, Wang H, Luo F, Liu Y. Subcutaneous injection of IFN alpha-2b for  
8 COVID-19: an observational study. *BMC infectious diseases*. 2020;20(1):1-6.
- 9  
10 586. Wang D, Fu B, Peng Z, Yang D, Han M, Li M, et al. Tocilizumab in patients with moderate or  
11 severe COVID-19: a randomized, controlled, open-label, multicenter trial. *Frontiers of medicine*. 2021:1-  
12 9.
- 13  
14 587. Wang M, Zhao Y, Hu W, Zhao D, Zhang Y, Wang T, et al. Treatment of COVID-19 Patients  
15 with Prolonged Post-Symptomatic Viral Shedding with Leflunomide--a Single-Center, Randomized,  
16 Controlled Clinical Trial. *Clinical Infectious Diseases: An Official Publication of the Infectious Diseases*  
17 *Society of America*. 2020.
- 18  
19 588. Wang Q, Guo H, Li Y, Jian X, Hou X, Zhong N, et al. Efficacy and safety of leflunomide for  
20 refractory COVID-19: an open-label controlled study. *MedRxiv*. 2020.
- 21  
22 589. Wang W, Zhao X, Wei W, Fan W, Gao K, He S, et al. Angiotensin-converting enzyme inhibitors  
23 (ACEI) or angiotensin receptor blockers (ARBs) may be safe for COVID-19 patients. *BMC infectious*  
24 *diseases*. 2021;21(1):1-8.
- 25  
26 590. Wang X, Xie P, Sun G, Zhao M, Deng Z, Zhou Y, et al. A systematic review and meta-analysis  
27 of the efficacy and safety of arbidol in the treatment of coronavirus disease 2019. *Medicine*. 2020;99(30).
- 28  
29 591. Wang Y, Jiang W, He Q, Wang C, Wang B, Zhou P, et al. Early, low-dose and short-term  
30 application of corticosteroid treatment in patients with severe COVID-19 pneumonia: single-center  
31 experience from Wuhan, China. *MedRxiv*. 2020.
- 32  
33 592. Wang Y, Zhang D, Du G, Du R, Zhao J, Jin Y, et al. Remdesivir in adults with severe COVID-  
34 19: a randomised, double-blind, placebo-controlled, multicentre trial. *The lancet*. 2020;395(10236):1569-  
35 78.
- 36  
37 593. Webb BJ, Buckel W, Vento T, Butler AM, Grisel N, Brown SM, et al. Real-World Effectiveness  
38 and Tolerability of Monoclonal Antibodies for Ambulatory Patients with Early COVID-19. *medRxiv*.  
39 2021.
- 40  
41 594. Weinreich DM, Sivapalasingam S, Norton T, Ali S, Gao H, Bhore R, et al. REGN-COV2, a  
42 neutralizing antibody cocktail, in outpatients with Covid-19. *New England Journal of Medicine*.  
43 2021;384(3):238-51.
- 44  
45 595. Wong CK, Wan EY, Luo S, Ding Y, Lau EH, Ling P, et al. Clinical outcomes of different  
46 therapeutic options for COVID-19 in two Chinese case cohorts: A propensity-score analysis.  
47 *EClinicalMedicine*. 2021;32:100743.
- 48  
49 596. Wu C, Hou D, Du C, Cai Y, Zheng J, Xu J, et al. Corticosteroid therapy for coronavirus disease  
50 2019-related acute respiratory distress syndrome: a cohort study with propensity score analysis. *Critical*  
51 *Care*. 2020;24(1):1-10.
- 52  
53  
54  
55  
56  
57  
58  
59  
60

**Comparative-effectiveness research of COVID-19 treatment: A rapid scoping review**

597. Wu J, Huang J, Zhu G, Liu Y, Xiao H, Zhou Q, et al. Systemic corticosteroids and mortality in severe and critical COVID-19 patients in Wuhan, China. *The Journal of Clinical Endocrinology & Metabolism*. 2020;105(12):e4230-e9.
598. Wu M, Ji J-J, Zhong L, Shao Z-Y, Xie Q-F, Liu Z-Y, et al. Thymosin  $\alpha$ 1 therapy in critically ill patients with COVID-19: a multicenter retrospective cohort study. *International immunopharmacology*. 2020;88:106873.
599. Wu X, Yu K, Wang Y, Xu W, Ma H, Hou Y, et al. Efficacy and safety of triazavirin therapy for coronavirus disease 2019: a pilot randomized controlled trial. *Engineering*. 2020;6(10):1185-91.
600. Xia X, Li K, Wu L, Wang Z, Zhu M, Huang B, et al. Improved Clinical Symptoms and Mortality on Severe/Critical COVID-19 Patients Utilizing Convalescent Plasma Transfusion. *Blood*. 2020.
601. Xu P, Huang J, Fan Z, Huang W, Qi M, Lin X, et al. Arbidol/IFN- $\alpha$ 2b therapy for patients with corona virus disease 2019: a retrospective multicenter cohort study. *Microbes and infection*. 2020;22(4-5):200-5.
602. Xu X, Jiang W, Chen L, Xu Z, Zhang Q, Zhu M, et al. Evaluation of the safety and efficacy of using human menstrual blood- derived mesenchymal stromal cells in treating severe and critically ill COVID- 19 patients: An exploratory clinical trial. *Clinical and translational medicine*. 2021;11(2):e297.
603. Xue H, Liu Y, Luo P, Liu X, Qiu L, Liu D, et al. Hydroxychloroquine treatment in COVID- 19: A descriptive observational analysis of 30 cases from a single center in Wuhan, China. *Journal of Medical Virology*. 2020;92(11):2523-7.
604. Yadegarinia D, Tehrani S, Abolghasemi S, Zarghi A, Sali S, Zolfaghari F. Evaluation of the efficacy of arbidol in comparison with the standard treatment regimen of hospitalized patients with Covid-19: a randomized clinical trial. *Archives of Clinical Infectious Diseases*. 2020;15(5).
605. Yan D, Liu X-Y, Zhu Y-n, Huang L, Dan B-t, Zhang G-j, et al. Factors associated with prolonged viral shedding and impact of lopinavir/ritonavir treatment in hospitalised non-critically ill patients with SARS-CoV-2 infection. *European Respiratory Journal*. 2020;56(1).
606. Ye X, Luo Y, Xia S, Sun Q, Ding J, Zhou Y, et al. Clinical efficacy of lopinavir/ritonavir in the treatment of Coronavirus disease 2019. *Eur Rev Med Pharmacol Sci*. 2020;24(6):3390-6.
607. Yormaz B, Ergün D, Tülek B, Ergün R, Arslan U, Kanat F. Impact of low molecular weight heparin administration on the clinical course of the COVID-19 disease. *Turkish journal of medical sciences*. 2021;51(1):28-38.
608. You X, Wu C-h, Fu Y-n, He Z, Huang P-f, Chen G-p, et al. The use of methylprednisolone in COVID-19 patients: A propensity score matched retrospective cohort study. *PloS one*. 2020;15(12):e0244128.
609. Yu B, Gutierrez VP, Carlos A, Hoge G, Pillai A, Kelly JD, et al. Empiric use of anticoagulation in hospitalized patients with COVID-19: a propensity score-matched study of risks and benefits. *Biomarker research*. 2021;9(1):1-11.
610. Yu B, Li C, Chen P, Zhou N, Wang L, Li J, et al. Low dose of hydroxychloroquine reduces fatality of critically ill patients with COVID-19. *Science China Life Sciences*. 2020;63(10):1515-21.

**Comparative-effectiveness research of COVID-19 treatment: A rapid scoping review**

611. Yu B, Li C, Chen P, Zhou N, Wang L, Li J, et al. Hydroxychloroquine application is associated with a decreased mortality in critically ill patients with COVID-19. medrxiv. 2020.
612. Yu J, Lu X, Tong L, Shi X, Ma J, Lv F, et al. Interferon-  $\alpha$ - 2b Aerosol Inhalation is Associated with Improved Clinical Outcomes in Patients with Coronavirus Disease- 2019. *British Journal of Clinical Pharmacology*. 2021.
613. Yu T, Tian C, Chu S, Zhou H, Zhang Z, Luo S, et al. COVID- 19 patients benefit from early antiviral treatment: A comparative, retrospective study. *Journal of Medical Virology*. 2020;92(11):2675-83.
614. Yuan M, Xu X, Xia D, Tao Z, Yin W, Tan W, et al. Effects of corticosteroid treatment for non-severe COVID-19 pneumonia: a propensity score-based analysis. *Shock*. 2020;54(5):638-43.
615. Zambrano GMT, Rivero RA, Valverde CV, Carmenate YV. Features and outcomes of secondary sepsis and urinary tract infections in COVID-19 patients treated with stem cell nebulization. medRxiv. 2020.
616. Zambrano GMT, Valverde CAV, Hernandez AB, Hadi LA, Rivero RA, Carmenate YV. Renal Involvement in Patients with COVID-19 Pneumonia and Outcomes After Stem Cell Nebulization. medRxiv. 2020.
617. Zantah M, Castillo ED, Gangemi AJ, Patel M, Chowdhury J, Verga S, et al. Anakinra and intravenous IgG versus tocilizumab in the treatment of COVID-19 pneumonia. medRxiv. 2020.
618. Zarychanski R, Investigators A. Therapeutic anticoagulation in critically ill patients with Covid-19—preliminary report. medRxiv. 2021.
619. Zha L, Li S, Pan L, Tefsen B, Li Y, French N, et al. Corticosteroid treatment of patients with coronavirus disease 2019 (COVID- 19). *Medical Journal of Australia*. 2020;212(9):416-20.
620. Zha L, Li S, Pan L, Tefsen B, Li Y, French N, et al. Corticosteroid treatment of patients with coronavirus disease 2019 (COVID- 19). *Medical Journal of Australia*. 2020;212(9):416-20.
621. Zhang C, Jin H, Wen Y, Yin G. A systematic review and network meta-analysis for COVID-19 treatments. MedRxiv. 2020.
622. Zhang X-J, Qin J-J, Cheng X, Shen L, Zhao Y-C, Yuan Y, et al. In-hospital use of statins is associated with a reduced risk of mortality among individuals with COVID-19. *Cell metabolism*. 2020;32(2):176-87. e4.
623. Zhao B, Liu M, Liu P, Peng Y, Huang J, Li M, et al. High Dose Intravenous Vitamin C for Preventing The Disease Aggravation of Moderate COVID-19 Pneumonia. A Retrospective Propensity Matched Before-After Study. *Frontiers in pharmacology*. 2021;12:519.
624. Zhao H, Zhang C, Zhu Q, Chen X, Chen G, Sun W, et al. Favipiravir in the treatment of patients with SARS-CoV-2 RNA recurrent positive after discharge: A multicenter, open-label, randomized trial. *International immunopharmacology*. 2021;97:107702.
625. Zhao H, Zhu Q, Zhang C, Li J, Wei M, Qin Y, et al. Tocilizumab combined with favipiravir in the treatment of COVID-19: A multicenter trial in a small sample size. *Biomedicine & Pharmacotherapy*. 2021;133:110825.



**Comparative-effectiveness research of COVID-19 treatment: A rapid scoping review**

1  
2  
3 626. Zheng F, Zhou Y, Zhou Z, Ye F, Huang B, Huang Y, et al. SARS-CoV-2 clearance in COVID-19  
4 patients with Novaferon treatment: A randomized, open-label, parallel-group trial. *International Journal of*  
5 *Infectious Diseases*. 2020;99:84-91.  
6

7 627. Zheng K-L, Xu Y, Guo Y-F, Diao L, Kong X-Y, Wan X-J, et al. Efficacy and safety of  
8 tocilizumab in COVID-19 patients. *Aging (Albany NY)*. 2020;12(19):18878.  
9

10 628. Zhu M-E, Wang Q, Zhou S, Wang B, Ke L, He P. Recombinant interleukin-2 stimulates  
11 lymphocyte recovery in patients with severe COVID-19. *Experimental and Therapeutic Medicine*.  
12 2021;21(3):1-.  
13  
14  
15  
16  
17  
18  
19  
20  
21  
22  
23  
24  
25  
26  
27  
28  
29  
30  
31  
32  
33  
34  
35  
36  
37  
38  
39  
40  
41  
42  
43  
44  
45  
46  
47  
48  
49  
50  
51  
52  
53  
54  
55  
56  
57  
58  
59  
60

For peer review only

## Comparative-effectiveness research of COVID-19 treatment: A rapid scoping review

### Appendix 5. List of included knowledge syntheses.

1. Abdelrahman Z, Liu Q, Jiang S, Li M, Sun Q, Zhang Y, et al. Evaluation of the current therapeutic approaches for COVID-19: a systematic review and a meta-analysis. *Frontiers in pharmacology*. 2021;12:30.
2. Abdelrahman Z, Liu Q, Jiang S, Li M, Sun Q, Zhang Y, et al. Evaluation of the current therapeutic approaches for COVID-19: a systematic review and a meta-analysis. *Frontiers in pharmacology*. 2021;12:30.
3. Abdelrahman Z, Liu Q, Jiang S, Li M, Sun Q, Zhang Y, et al. Evaluation of the current therapeutic approaches for COVID-19: a systematic review and a meta-analysis. *Frontiers in pharmacology*. 2021;12:30.
4. Abdulrahman B, Aletreby W, Mady A, Noor AM, Lhmdi M, Faqihi F, et al. Tocilizumab Effect in COVID-19 Hospitalized Patients: A Systematic Review and Meta-Analysis of Randomized Control Trials. *medRxiv*. 2021.
5. Abeldaño Zuñiga RA, Coca SM, Abeldaño GF, González-Villoria RAM. Clinical effectiveness of drugs in hospitalized patients with COVID-19: a systematic review and meta-analysis. *Therapeutic advances in respiratory disease*. 2021;15:17534666211007214.
6. Abubakar AR, Sani IH, Godman B, Kumar S, Islam S, Jahan I, et al. Systematic review on the therapeutic options for COVID-19: clinical evidence of drug efficacy and implications. *Infection and drug resistance*. 2020;13:4673.
7. Agstam S, Yadav A, Kumar-M P, Gupta A. Hydroxychloroquine and QTc prolongation in patients with COVID-19: a systematic review and meta-analysis. *Indian Pacing and Electrophysiology Journal*. 2021;21(1):36-43.
8. Ahmad A, Salsabil M, Oliver T. Mortality rates in matched cohort, pseudo-randomised and randomised trials of convalescent plasma given to COVID-19 patients. *medRxiv*. 2020.
9. Alexander PE, Piticarú J, Lewis K, Aryal K, Thomas P, Szczeklik W, et al. Remdesivir use in patients with coronavirus COVID-19 disease: a systematic review and meta-analysis. *MedRXiv*. 2020.
10. Alhumaid S, Al Mutair A, Al Alawi Z, Alhmeed N, Zaidi ARZ, Tobaiqy M. Efficacy and safety of lopinavir/ritonavir for treatment of COVID-19: a systematic review and meta-analysis. *Tropical medicine and infectious disease*. 2020;5(4):180.
11. Alhumaid S, Al Mutair A, Al Alawi Z, Alhmeed N, Zaidi ARZ, Tobaiqy M. Efficacy and safety of lopinavir/ritonavir for treatment of COVID-19: a systematic review and meta-analysis. *Tropical medicine and infectious disease*. 2020;5(4):180.
12. Ali S, Uddin SZ, Dewan MN, Moniruzzaman M, Kabir MH, Islam MR, et al. Differential effect of corticosteroid treatment on Influenza, SARS, MERS, and SARS-CoV-2 patients: A meta-analysis and systematic review. *medRxiv*. 2021.
13. Alzghari SK, Acuña VS. Supportive treatment with tocilizumab for COVID-19: a systematic review. *Journal of Clinical Virology*. 2020;127:104380.

**Comparative-effectiveness research of COVID-19 treatment: A rapid scoping review**

14. Amani B, Khanijahani A, Amani B. Hydroxychloroquine plus standard of care compared with standard of care alone in COVID-19: a meta-analysis of randomized controlled trials. *Scientific Reports*. 2021;11(1):1-10.
15. Antwi- Amoabeng D, Kanji Z, Ford B, Beutler BD, Riddle MS, Siddiqui F. Clinical outcomes in COVID- 19 patients treated with tocilizumab: An individual patient data systematic review. *Journal of medical virology*. 2020;92(11):2516-22.
16. Aviani JK, Halim D, Soeroto AY, Achmad TH, Djuwantono T. Current views on the potentials of convalescent plasma therapy (CPT) as Coronavirus disease 2019 (COVID- 19) treatment: A systematic review and meta- analysis based on recent studies and previous respiratory pandemics. *Reviews in medical virology*. 2021.
17. Axfors C, Schmitt AM, Janiaud P, van't Hooft J, Abd-Elsalam S, Abdo EF, et al. Mortality outcomes with hydroxychloroquine and chloroquine in COVID-19 from an international collaborative meta-analysis of randomized trials. *Nature communications*. 2021;12(1):1-13.
18. Aziz M, Haghbin H, Abu Sitta E, Nawras Y, Fatima R, Sharma S, et al. Efficacy of tocilizumab in COVID- 19: a systematic review and meta- analysis. *Journal of Medical Virology*. 2021;93(3):1620-30.
19. Bakhtawar N, Usman M, Khan MMU. Convalescent plasma therapy and its effects on COVID-19 patient outcomes: a systematic review of current literature. *Cureus*. 2020;12(8).
20. Baladia E, Pizarro AB, Ortiz-Muñoz L, Rada G, Group C-LOW. Vitamin C for COVID-19: A living systematic review. *Medwave*. 2020;20(6).
21. Bansal V, Mahapure KS, Bhurwal A, Gupta I, Hassanain S, Makadia J, et al. Mortality benefit of remdesivir in COVID-19: a systematic review and meta-analysis. *Frontiers in medicine*. 2020;7.
22. Barboza JJ, Chambergo-Michilot D, Velasquez-Sotomayor M, Silva-Rengifo C, Diaz-Arocutipa C, Caballero-Alvarado J, et al. Assessment and management of asymptomatic COVID-19 infection: A Systematic Review. *Travel medicine and infectious disease*. 2021:102058.
23. Barkas F, Ntekouan SF, Kosmidou M, Liberopoulos E, Lontos A, Milionis H. Anakinra in hospitalized non-intubated patients with coronavirus disease 2019: a systematic review and meta-analysis. *Rheumatology (Oxford, England)*. 2021.
24. Baroutjian A, Sanchez C, Boneva D, McKenney M, Elkbuli A. SARS-CoV-2 pharmacologic therapies and their safety/effectiveness according to level of evidence. *The American Journal of Emergency Medicine*. 2020.
25. Barreira DF, Lourenço RA, Calisto R, Moreira-Gonçalves D, Santos LL, Videira PA. Assessment of the safety and therapeutic benefits of convalescent plasma in COVID-19 treatment: a systematic review and meta-analysis. *Frontiers in medicine*. 2021;8.
26. Barzkar F, Ranjbar M, Sioofy-Khojine A-B, Khajehazad M, Azad RV, Moradi Y, et al. Efficacy and safety of chloroquine and hydroxychloroquine for COVID-19: A comprehensive evidence synthesis of clinical, animal, and in vitro studies. *Medical Journal of the Islamic Republic of Iran*. 2020;34:171.
27. Bassatne A, Basbous M, Chakhtoura M, El Zein O, Rahme M, Fuleihan GE-H. The link between COVID-19 and Vitamin D (VIVID): a systematic review and meta-analysis. *Metabolism*. 2021:154753.

## Comparative-effectiveness research of COVID-19 treatment: A rapid scoping review

28. Bhattacharyya A, Kumar S, Sarma P, Kaur H, Prajapat M, Shekhar N, et al. Safety and efficacy of lopinavir/ritonavir combination in COVID-19: A systematic review, meta-analysis, and meta-regression analysis. *Indian journal of pharmacology*. 2020;52(4):313.
29. Bhowmick S, Dang A, Vallish B, Dang S. Safety and Efficacy of Ivermectin and Doxycycline Monotherapy and in Combination in the Treatment of COVID-19: A Scoping Review. *Drug safety*. 2021:1-10.
30. Bignardi PR, Vengrus CS, Aquino BM, Cerci Neto A. Use of hydroxychloroquine and chloroquine in patients with COVID-19: a meta-analysis of randomized clinical trials. *Pathogens and global health*. 2021;115(3):139-50.
31. Bokharee N, Khan YH, Khokhar A, Mallhi TH, Alotaibi NH, Rasheed M. Pharmacological interventions for COVID-19: a systematic review of observational studies and clinical trials. *Expert Review of Anti-infective Therapy*. 2021(just-accepted).
32. Boregowda U, Perisetti A, Nanjappa A, Gajendran M, Sridharan GK, Goyal H. Addition of tocilizumab to the standard of care reduces mortality in severe COVID-19: a systematic review and meta-analysis. *Frontiers in medicine*. 2020;7.
33. Boregowda U, Perisetti A, Nanjappa A, Gajendran M, Sridharan GK, Goyal H. Addition of tocilizumab to the standard of care reduces mortality in severe COVID-19: a systematic review and meta-analysis. *Frontiers in medicine*. 2020;7.
34. Budhathoki P, Shrestha DB, Khadka S, Rawal E. Is Hydroxychloroquine with Azithromycin a Good Combination in COVID-19 Compared to Hydroxychloroquine Alone from Cardiac Perspective? A Systematic Review and Meta-Analysis. *Journal of Nepal Health Research Council*. 2021;19(1):1-9.
35. Budhathoki P, Shrestha DB, Rawal E, Khadka S. Corticosteroids in COVID-19: Is it rational? A Systematic review and meta-analysis. *SN comprehensive clinical medicine*. 2020:1-21.
36. Cano EJ, Fuentes XF, Campioli CC, O'Horo JC, Saleh OA, Odeyemi Y, et al. Impact of corticosteroids in coronavirus disease 2019 outcomes: systematic review and meta-analysis. *Chest*. 2021;159(3):1019-40.
37. Cantini F, Goletti D, Petrone L, Fard SN, Niccoli L, Foti R. Immune therapy, or antiviral therapy, or both for COVID-19: a systematic review. *Drugs*. 2020:1-18.
38. Castañeda-Sabogal A, Chambergo-Michilot D, Toro-Huamanchumo CJ, Silva-Rengifo C, Gonzales-Zamora J, Barboza JJ. Outcomes of Ivermectin in the treatment of COVID-19: a systematic review and meta-analysis. *medRxiv*. 2021.
39. Celotto S, Veronese N, Barbagallo M, Ometto F, Smith L, Pardhan S, et al. An umbrella review of systematic reviews with meta-analyses evaluating positive and negative outcomes of hydroxychloroquine and chloroquine therapy. *International Journal of Infectious Diseases*. 2020.
40. Chacko J, Brar G, Premkumar R. Hydroxychloroquine in COVID-19: an updated systematic review and meta-analysis. *Medrxiv*. 2020.
41. Chandrasekar VT, Venkatesalu B, Patel HK, Spadaccini M, Manteuffel J, Ramesh MS. A Systematic Review and Meta-analysis of Therapeutic options against SARS-CoV-2. *medRxiv*. 2020.

**Comparative-effectiveness research of COVID-19 treatment: A rapid scoping review**

42. Chaudhuri D, Sasaki K, Karkar A, Sharif S, Lewis K, Mammen MJ, et al. Corticosteroids in COVID-19 and non-COVID-19 ARDS: a systematic review and meta-analysis. *Intensive care medicine*. 2021;1-17.
43. Chen C, Pan K, Wu B, Li X, Chen Z, Xu Q, et al. Safety of hydroxychloroquine in COVID-19 and other diseases: a systematic review and meta-analysis of 53 randomized trials. *European journal of clinical pharmacology*. 2021;77(1):13-24.
44. Chen C-x, Wang J-j, Li H, Yuan L-t, Gale RP, Liang Y. JAK-inhibitors for coronavirus disease-2019 (COVID-19): a meta-analysis. *Leukemia*. 2021:1-5.
45. Chenchula S, Ray A, Sadasivam B. Famotidine Repurposing for Novel Corona Virus Disease of 2019: A Systematic Review. *Drug research*. 2021.
46. Cheng W, Li Y, Cui L, Chen Y, Shan S, Xiao D, et al. Efficacy and safety of corticosteroid treatment in patients with COVID-19: a systematic review and meta-analysis. *Frontiers in pharmacology*. 2020;11:1378.
47. Chiu L, Chow R, Chiu N, Lo C-H, Aggarwal R, Lee J, et al. Colchicine use in patients with COVID-19: A systematic review and meta-analysis. *MedRxiv*. 2021.
48. Chiu L, Shen M, Lo C-H, Chiu N, Chen A, Shin HJ, et al. Effect of famotidine on hospitalized patients with COVID-19: A systematic review and meta-analysis. *PloS one*. 2021;16(11):e0259514.
49. Chivese T, Musa OA, Hindy G, Wattary N, Badran S, Soliman N, et al. A meta-review of systematic reviews and an updated meta-analysis on the efficacy of chloroquine and hydroxychloroquine in treating COVID19 infection. *medRxiv*. 2020:2020.07. 28.20164012.
50. Choudhuri AH, Duggal S, Ahuja B, Biswas PS. The efficacy and safety of hydroxychloroquine (HCQ) in treatment of COVID19—a systematic review and meta-analysis. *Indian Journal of Medical Microbiology*. 2021.
51. Choudhuri AH, Duggal S, Ahuja B, Biswas PS. The efficacy and safety of hydroxychloroquine (HCQ) in treatment of COVID19—a systematic review and meta-analysis. *Indian Journal of Medical Microbiology*. 2021.
52. Choupoo NS, Das SK, Haldar R, Sarkar H, Tewari R, Ray S. Evaluating the Efficacy and Safety of the Existing Repurposed Pharmacological Agents for Treating COVID-19: A Meta-analysis and Systematic Review of Clinical Trials. *Indian Journal of Critical Care Medicine: Peer-reviewed, Official Publication of Indian Society of Critical Care Medicine*. 2020;24(11):1106.
53. Cioca G, Skowron Ł, Źak Ź, Józwiak J, Zyska A. Immunosuppression drugs seize the overacting immune system by preventing the cytokine storm in covid-19 symptoms. *Systematic Reviews in Pharmacy*. 2021;12(2).
54. Coomes EA, Haghbayan H. Interleukin- 6 in COVID- 19: a systematic review and meta-analysis. *Reviews in medical virology*. 2020;30(6):1-9.
55. Cordeiro LP, Linhares EO, Nogueira FG, Moreira-Silva D, Medeiros-Lima DJ. Perspectives on glucocorticoid treatment for COVID-19: a systematic review. *Pharmacological Reports*. 2021:1-8.
56. Cortegiani A, Ippolito M, Greco M, Granone V, Protti A, Gregoretto C, et al. Rationale and evidence on the use of tocilizumab in COVID-19: a systematic review. *Pulmonology*. 2021;27(1):52-66.

**Comparative-effectiveness research of COVID-19 treatment: A rapid scoping review**

57. Cortegiani A, Ippolito M, Ingoglia G, Iozzo P, Giarratano A, Einav S. Update I. A systematic review on the efficacy and safety of chloroquine/hydroxychloroquine for COVID-19. *Journal of critical care*. 2020.
58. Das RR, Jaiswal N, Dev N, Jaiswal N, Naik SS, Sankar J. Efficacy and safety of anti-malarial drugs (chloroquine and hydroxy-chloroquine) in treatment of COVID-19 infection: a systematic review and meta-analysis. *Frontiers in medicine*. 2020;7:482.
59. Del Pozo JS-G, Galindo M, Nava E, Jordán J. A systematic review on the efficacy and safety of IL-6 modulatory drugs in the treatment of COVID-19 patients. *Eur Rev Med Pharmacol Sci*. 2020;24(13):7475-84.
60. Di Castelnuovo A, Costanzo S, Cassone A, Cauda R, de Gaetano G, Iacoviello L. Low dose hydroxychloroquine is associated with lower mortality in COVID-19: a meta-analysis of 26 studies and 44,521 patients. *medRxiv*. 2020.
61. Diallo A, Carlos-Bolumbu M, Traoré M, Diallo MH, Jedrecy C. An updated systematic review and network meta-analysis of 25 randomized trials assessing the efficacy and safety of treatments in COVID-19 disease. *Journal of Public Health Research*. 2021;10(1).
62. Diaz- Arocutipa C, Brañez- Condorena A, Hernandez AV. QTc prolongation in COVID- 19 patients treated with hydroxychloroquine, chloroquine, azithromycin, or lopinavir/ritonavir: A systematic review and meta- analysis. *Pharmacoepidemiology and Drug Safety*. 2021;30(6):694-706.
63. Dong Y, Shamsuddin A, Campbell H, Theodoratou E. Current COVID-19 treatments: Rapid review of the literature. *Journal of global health*. 2021;11.
64. Ebina-Shibuya R, Namkoong H, Horita N, Kato H, Hara Y, Kobayashi N, et al. Hydroxychloroquine and chloroquine for treatment of coronavirus disease 19 (COVID-19): a systematic review and meta-analysis of randomized and non-randomized controlled trials. *Journal of Thoracic Disease*. 2021;13(1):202.
65. Elavarasi A, Prasad M, Seth T, Sahoo RK, Madan K, Nischal N, et al. Chloroquine and hydroxychloroquine for the treatment of COVID-19: a systematic review and meta-analysis. *Journal of general internal medicine*. 2020:1-7.
66. Elavarasi A, Sahoo RK, Seth T, Madan K, Nischal N, Soneja M, et al. Anti-interleukin-6 therapies for Covid-19: A systematic review, critical appraisal and meta-analysis. *The National Medical Journal of India*. 2020;33(3):152.
67. Eljaaly K, Alireza KH, Alshehri S, Al-Tawfiq JA. Hydroxychloroquine safety: A meta-analysis of randomized controlled trials. *Travel medicine and infectious disease*. 2020;36:101812.
68. Elsayah HK, Elsokary MA, Abdallah MS, ElShafie AH. Efficacy and safety of remdesivir in hospitalized Covid- 19 patients: systematic review and meta- analysis including network meta- analysis. *Reviews in medical virology*. 2021;31(4):e2187.
69. Elsayah HK, Elsokary MA, Elrazzaz MG, Elshafie AH. Hydroxychloroquine for treatment of nonsevere COVID- 19 patients: Systematic review and meta- analysis of controlled clinical trials. *Journal of medical virology*. 2021;93(3):1265-75.

**Comparative-effectiveness research of COVID-19 treatment: A rapid scoping review**

70. Eze P, Mezue KN, Nduka CU, Obianyo I, Egbuche O. Efficacy and safety of chloroquine and hydroxychloroquine for treatment of COVID-19 patients-a systematic review and meta-analysis of randomized controlled trials. *American journal of cardiovascular disease*. 2021;11(1):93.
71. Fajgenbaum DC, Khor JS, Gorzewski A, Tamakloe M-A, Powers V, Kakkis JJ, et al. Treatments administered to the first 9152 reported cases of COVID-19: a systematic review. *Infectious diseases and therapy*. 2020;9:435-49.
72. Fiolet T, Guihur A, Rebeaud ME, Mulot M, Peiffer-Smadja N, Mahamat-Saleh Y. Effect of hydroxychloroquine with or without azithromycin on the mortality of coronavirus disease 2019 (COVID-19) patients: a systematic review and meta-analysis. *Clinical microbiology and infection*. 2021;27(1):19-27.
73. Flumignan RL, de Sá Tinôco JD, Pascoal PI, Areias LL, Cossi MS, Fernandes MI, et al. Prophylactic anticoagulants for people hospitalised with COVID- 19. *Cochrane Database of Systematic Reviews*. 2020(10).
74. Ford N, Vitoria M, Rangaraj A, Norris SL, Calmy A, Doherty M. Systematic review of the efficacy and safety of antiretroviral drugs against SARS, MERS or COVID- 19: initial assessment. *Journal of the International AIDS Society*. 2020;23(4):e25489.
75. Gbinigie K, Frie K. Should azithromycin be used to treat COVID-19? A rapid review. *BJGP open*. 2020;4(2).
76. Gbinigie K, Frie K. Should chloroquine and hydroxychloroquine be used to treat COVID-19? A rapid review. *BJGP open*. 2020;4(2).
77. Ghazy RM, Almaghraby A, Shaaban R, Kamal A, Beshir H, Moursi A, et al. A systematic review and meta-analysis on chloroquine and hydroxychloroquine as monotherapy or combined with azithromycin in COVID-19 treatment. *Scientific reports*. 2020;10(1):1-18.
78. Ghazy RM, Almaghraby A, Shaaban R, Kamal A, Beshir H, Moursi A, et al. Effectiveness and Safety of Chloroquine or Hydroxychloroquine as a mono-therapy or in combination with Azithromycin in the treatment of COVID-19 patients: Systematic Review and Meta-Analysis. *medRxiv*. 2020.
79. Ghosn L, Chaimani A, Evrenoglou T, Davidson M, Graña C, Schmucker C, et al. Interleukin- 6 blocking agents for treating COVID- 19: a living systematic review. *Cochrane Database of Systematic Reviews*. 2021(3).
80. Gupta I, Mahapure K, Bansal V, Hassanain S, Makadia J, Madas N, et al. 144: Clinical Outcomes of Remdesivir in COVID-19: A Systematic Review and Meta-Analysis. *Critical Care Medicine*. 2021;49(1):57.
81. Halpin DM, Singh D, Hadfield RM. Inhaled corticosteroids and COVID-19: a systematic review and clinical perspective. *European Respiratory Journal*. 2020;55(5).
82. Han Q, Guo M, Zheng Y, Zhang Y, De Y, Xu C, et al. Current evidence of interleukin-6 signaling inhibitors in patients with COVID-19: a systematic review and meta-analysis. *Frontiers in pharmacology*. 2020;11:2119.

**Comparative-effectiveness research of COVID-19 treatment: A rapid scoping review**

83. Hariyanto TI, Halim DA, Jodhinata C, Yanto TA, Kurniawan A. Colchicine treatment can improve outcomes of coronavirus disease 2019 (COVID- 19): a systematic review and meta- analysis. *Clinical and Experimental Pharmacology and Physiology*. 2021;48(6):823-30.
84. Hariyanto TI, Hardyson W, Kurniawan A. Efficacy and safety of tocilizumab for coronavirus disease 2019 (Covid-19) patients: a systematic review and meta-analysis. *Drug Research*. 2021.
85. Hasan SS, Capstick T, Ahmed R, Kow CS, Mazhar F, Merchant HA, et al. Mortality in COVID-19 patients with acute respiratory distress syndrome and corticosteroids use: a systematic review and meta-analysis. *Expert review of respiratory medicine*. 2020;14(11):1149-63.
86. Hasan SS, Kow CS, Mustafa ZU, Merchant HA. Does methylprednisolone reduce the mortality risk in hospitalized COVID-19 patients? A meta-analysis of randomized control trials. *Expert review of respiratory medicine*. 2021(just-accepted).
87. Hasan SS, Radford S, Kow CS, Zaidi STR. Venous thromboembolism in critically ill COVID-19 patients receiving prophylactic or therapeutic anticoagulation: a systematic review and meta-analysis. *Journal of thrombosis and thrombolysis*. 2020;50(4):814-21.
88. Hassanipour S, Arab-Zozani M, Amani B, Heidarzad F, Fathalipour M, Martinez-de-Hoyo R. The efficacy and safety of Favipiravir in treatment of COVID-19: A systematic review and meta-analysis of clinical trials. *Scientific reports*. 2021;11(1):1-11.
89. Hernandez AV, Roman YM, Pasupuleti V, Barboza JJ, White CM. Hydroxychloroquine or chloroquine for treatment or prophylaxis of COVID-19: a living systematic review. *Annals of internal medicine*. 2020;173(4):287-96.
90. Hill T, Baker M, Isherwood L, Lee LY. Comprehensive Systematic Review to Identify putative COVID-19 Treatments: Roles for Immunomodulator and Antiviral Treatments. *medRxiv*. 2020.
91. Ho T-C, Wang Y-H, Chen Y-L, Tsai W-C, Lee C-H, Chuang K-P, et al. Chloroquine and Hydroxychloroquine: Efficacy in the Treatment of the COVID-19. *Pathogens*. 2021;10(2):217.
92. Hong TS, Gonzalez J, Nahass RG, Brunetti L. Impact of Hydroxychloroquine on Mortality in Hospitalized Patients with COVID-19: Systematic Review and Meta-Analysis. *Pharmacy*. 2020;8(4):208.
93. Huang D, Yu H, Wang T, Yang H, Yao R, Liang Z. Efficacy and safety of umifenovir for coronavirus disease 2019 (COVID- 19): A systematic review and meta- analysis. *Journal of medical virology*. 2021;93(1):481-90.
94. Hussain N, Chung E, Heyl JJ, Hussain B, Oh MC, Pinon C, et al. A Meta-Analysis on the Effects of Hydroxychloroquine on COVID-19. *Cureus*. 2020;12(8).
95. Hussain N, Yoganathan A, Hewage S, Alom S, Harky A. The effect of antivirals on COVID-19: A systematic review. *Expert Review of Anti-infective Therapy*. 2021;19(4):473-86.
96. Hussain S, Syeda A, Al-Wutayd O, Al Nafeesah A, Alshammari M, Alnasser S, et al. Efficacy of Tocilizumab in Covid 19: A metanalysis of case series studies. 2020.
97. Ibekwe T, Ibekwe P, Orimadegun EA. Third force in the treatment of COVID-19: A systematic review and meta-analysis. *Annals of Medicine and Surgery*. 2021:102218.



**Comparative-effectiveness research of COVID-19 treatment: A rapid scoping review**

98. Jiang W, Li W, Xiong L, Wu Q, Wu J, He B, et al. Clinical efficacy of convalescent plasma therapy on treating COVID- 19 patients: Evidence from matched study and a meta- analysis. *Clinical and translational medicine*. 2020;10(8).
99. Jiang Y, Chen D, Cai D, Yi Y, Jiang S. Effectiveness of remdesivir for the treatment of hospitalized Covid- 19 persons: a network meta- analysis. *Journal of medical virology*. 2021;93(2):1171-4.
100. Joseph BA, Dibas M, Evanson KW, Paranjape G, Vegivinti CTR, Selvan PT, et al. Efficacy and safety of lopinavir/ritonavir in the treatment of COVID-19: A systematic review. *Expert review of anti-infective therapy*. 2021;19(6):679-87.
101. Julia del Amo M. Systematic review and meta-analysis of randomized trials of. 2021.
102. Juul S, Nielsen EE, Feinberg J, Siddiqui F, Jørgensen CK, Barot E, et al. Interventions for treatment of COVID-19: of a living systematic review with meta-analyses and trial sequential analyses (The LIVING Project). *PloS one*. 2021;16(3):e0248132.
103. Juul S, Nielsen EE, Feinberg J, Siddiqui F, Jørgensen CK, Barot E, et al. Interventions for treatment of COVID-19: of a living systematic review with meta-analyses and trial sequential analyses (The LIVING Project). *PloS one*. 2021;16(3):e0248132.
104. Kaka AS, MacDonald R, Greer N, Vela K, Duan-Porter W, Obley A, et al. Major update: remdesivir for adults with COVID-19: a living systematic review and meta-analysis for the American College of Physicians Practice Points. *Annals of internal medicine*. 2021;174(5):663-72.
105. Kalfas S, Visvanathan K, Chan K, Drago J. The therapeutic potential of ivermectin for COVID-19: A review of mechanisms and evidence. *medRxiv*. 2020.
106. Kamel AM, Sobhy M, Magdy N, Sabry N, Farid S. Anticoagulation outcomes in hospitalized Covid- 19 patients: A systematic review and meta- analysis of case- control and cohort studies. *Reviews in medical virology*. 2021;31(3):e2180.
107. Karale S, Bansal V, Makadia J, Tayyeb M, Khan H, Ghanta SS, et al. A Meta-analysis of Mortality, Need for ICU admission, Use of Mechanical Ventilation and Adverse Effects with Ivermectin Use in COVID-19 Patients. *medRxiv*. 2021.
108. Kashour Z, Kashour T, Gerberi D, Tleyjeh IM. Mortality, viral clearance, and other clinical outcomes of hydroxychloroquine in COVID- 19 Patients: A Systematic Review and Meta- Analysis of Randomized Controlled Trials. *Clinical and Translational Science*. 2021.
109. Kashour Z, Riaz M, Garbati MA, AlDosary O, Tlayjeh H, Gerberi D, et al. Efficacy of chloroquine or hydroxychloroquine in COVID-19 patients: a systematic review and meta-analysis. *Journal of Antimicrobial Chemotherapy*. 2021;76(1):30-42.
110. Kashour Z, Riaz M, Garbati MA, AlDosary O, Tlayjeh H, Gerberi D, et al. Efficacy of chloroquine or hydroxychloroquine in COVID-19 patients: a systematic review and meta-analysis. *Journal of Antimicrobial Chemotherapy*. 2021;76(1):30-42.
111. Kaye AG, Siegel R. The efficacy of IL-6 inhibitor Tocilizumab in reducing severe COVID-19 mortality: a systematic review. *PeerJ*. 2020;8:e10322.

## Comparative-effectiveness research of COVID-19 treatment: A rapid scoping review

112. Kaye AG, Siegel R. The efficacy of IL-6 inhibitor Tocilizumab in reducing severe COVID-19 mortality: a systematic review. *PeerJ*. 2020;8:e10322.
113. Khalili M, Chegeni M, Javadi S, Farokhnia M, Sharifi H, Karamouzian M. Therapeutic interventions for COVID-19: a living overview of reviews. *Therapeutic Advances in Respiratory Disease*. 2020;14:1753466620976021.
114. Khan FA, Stewart I, Fabbri L, Moss S, Robinson K, Smyth AR, et al. Systematic review and meta-analysis of anakinra, sarilumab, siltuximab and tocilizumab for COVID-19. *Thorax*. 2021.
115. Khan S, Gionfriddo MR, Cortes-Penfield N, Thunga G, Rashid M. The trade-off dilemma in pharmacotherapy of COVID-19: systematic review, meta-analysis, and implications. *Expert Opinion on Pharmacotherapy*. 2020;21(15):1821-49.
116. Khodashahi R, Naderi H, Bojdy A, Khodashahi M. Effectiveness of antiviral and immunomodulatory agents in the treatment of covid-19: A systematic review. *Current Respiratory Medicine Reviews*. 2020;16(3):165-83.
117. Kim MS, An MH, Kim WJ, Hwang T-H. Comparative efficacy and safety of pharmacological interventions for the treatment of COVID-19: A systematic review and network meta-analysis. *PLoS medicine*. 2020;17(12):e1003501.
118. Kim MS, An MH, Kim WJ, Hwang T-H. Comparative efficacy and safety of pharmacological interventions for the treatment of COVID-19: A systematic review and network meta-analysis. *PLoS medicine*. 2020;17(12):e1003501.
119. Klassen SA, Senefeld JW, Johnson PW, Carter RE, Wiggins CC, Shoham S, et al. Evidence favoring the efficacy of convalescent plasma for COVID-19 therapy. *MedRxiv*. 2020.
120. Klassen SA, Senefeld JW, Johnson PW, Carter RE, Wiggins CC, Shoham S, et al., editors. The effect of convalescent plasma therapy on COVID-19 patient mortality: systematic review and Meta-analysis. *Mayo Clinic Proceedings*; 2021: Elsevier.
121. Kotak S, Khatri M, Malik M, Malik M, Hassan W, Amjad A, et al. Use of tocilizumab in COVID-19: a systematic review and meta-analysis of current evidence. *Cureus*. 2020;12(10).
122. Kotecha P, Light A, Checcucci E, Amparore D, Fiori C, Porpiglia F, et al. Repurposing of drugs for Covid-19: a systematic review and meta-analysis. *MedRxiv*. 2020.
123. Kow CS, Aldeyab M, Hasan SS. Effect of remdesivir on mortality in patients with COVID- 19: A meta- analysis of randomized control trials. *Journal of Medical Virology*. 2021;93(4):1860-1.
124. Kow CS, Burud IAS, Hasan SS, editors. Use of Famotidine and Risk of Severe Course of Illness in Patients With COVID-19: A Meta-analysis. *Mayo Clinic Proceedings*; 2021: Elsevier.
125. Kow CS, Hasan SS. Meta-analysis of effect of statins in patients with COVID-19. *American Journal of Cardiology*. 2020;134:153-5.
126. Kow CS, Hasan SS. A meta-analysis on the preadmission use of DPP-4 inhibitors and risk of a fatal or severe course of illness in patients with COVID-19. *Therapie*. 2020.
127. Kow CS, Hasan SS. Preadmission use of inhaled corticosteroids and risk of fatal or severe COVID-19: a meta-analysis. *Journal of Asthma*. 2021:1-4.

**Comparative-effectiveness research of COVID-19 treatment: A rapid scoping review**

128. Kumar J, Jain S, Meena J, Yadav A. Efficacy and safety of hydroxychloroquine/chloroquine against SARS-CoV-2 infection: a systematic review and meta-analysis. *Journal of Infection and Chemotherapy*. 2021.
129. Kyriazopoulou E, Huet T, Cavalli G, Gori A, Kyprianou M, Pickkers P, et al. Effect of anakinra on mortality in COVID-19: a patient level meta-analysis. *medRxiv*. 2021.
130. Lai C-C, Chen C-H, Wang C-Y, Chen K-H, Wang Y-H, Hsueh P-R. Clinical efficacy and safety of remdesivir in patients with COVID-19: a systematic review and network meta-analysis of randomized controlled trials. *Journal of Antimicrobial Chemotherapy*. 2021.
131. Lan S-H, Lai C-C, Huang H-T, Chang S-P, Lu L-C, Hsueh P-R. Tocilizumab for severe COVID-19: a systematic review and meta-analysis. *International journal of antimicrobial agents*. 2020;56(3):106103.
132. Lazaridis D, Leung S, Kohler L, Smith CH, Kearson ML, Eraikhuemen N. The Impact of Anticoagulation on COVID-19 (SARS CoV-2) Patient Outcomes: A Systematic Review. *Journal of Pharmacy Practice*. 2021:08971900211015055.
133. Lee KH, Yoon S, Jeong GH, Kim JY, Han YJ, Hong SH, et al. Efficacy of corticosteroids in patients with SARS, MERS and COVID-19: a systematic review and meta-analysis. *Journal of clinical medicine*. 2020;9(8):2392.
134. Lepere P, Escarguel B, Yolartiran S, Escarguel C. COVID-19: Can early home treatment with Azithromycin alone or with Zinc help prevent hospitalisation, death, and long-COVID-19? A review. *medRxiv*. 2021:2020.12. 29.20248975.
135. Li H, Chen C, Hu F, Wang J, Zhao Q, Gale RP, et al. Impact of corticosteroid therapy on outcomes of persons with SARS-CoV-2, SARS-CoV, or MERS-CoV infection: a systematic review and meta-analysis. *Leukemia*. 2020;34(6):1503-11.
136. Li J, Liao X, Zhou Y, Wang L, Yang H, Zhang W, et al. Comparison of associations between glucocorticoids treatment and mortality in COVID-19 patients and SARS patients: a systematic review and meta-analysis. *Shock*. 2021.
137. Li Y, He W. Comparative Efficacy and Safety of Current Drugs against COVID-19: a Systematic Review and Net-work Meta Analysis. *medRxiv*. 2020.
138. Liao G, Zheng K, Lalu MM, Fergusson DA, Allan DS. A scoping review of registered clinical trials of cellular therapy for COVID-19 and a Framework for Accelerated Synthesis of Trial Evidence—FAST evidence. *Transfusion medicine reviews*. 2020;34(3):165-71.
139. Lima WG, Brito JCM, Overhage J, da Cruz Nizer WS. The potential of drug repositioning as a short-term strategy for the control and treatment of COVID-19 (SARS-CoV-2): a systematic review. *Archives of virology*. 2020;165(8):1729-37.
140. Lin W-T, Hung S-H, Lai C-C, Wang C-Y, Chen C-H. The effect of tocilizumab on COVID-19 patient mortality: A systematic review and meta-analysis of randomized controlled trials. *International immunopharmacology*. 2021:107602.

## Comparative-effectiveness research of COVID-19 treatment: A rapid scoping review

141. Liu W, Zhou P, Chen K, Ye Z, Liu F, Li X, et al. Efficacy and safety of antiviral treatment for COVID-19 from evidence in studies of SARS-CoV-2 and other acute viral infections: a systematic review and meta-analysis. *Cmaj*. 2020;192(27):E734-E44.
142. Lou L, Zhang H, Li Z, Tang B, Li Z. The efficacy and safety of remdesivir in the treatment of patients with COVID-19: a systematic review and meta-analysis. *medRxiv*. 2021.
143. Lu S, Zhou Q, Huang L, Shi Q, Zhao S, Wang Z, et al. Effectiveness and safety of glucocorticoids to treat COVID-19: a rapid review and meta-analysis. *Annals of translational medicine*. 2020;8(10).
144. Lu Y-f, Pan L-y, Zhang W-W, Cheng F, Hu S-S, Zhang X, et al. A meta-analysis of the incidence of venous thromboembolic events and impact of anticoagulation on mortality in patients with COVID-19. *International journal of infectious diseases*. 2020;100:34-41.
145. Ma S, Xu C, Liu S, Sun X, Li R, Mao M, et al. Efficacy and safety of systematic corticosteroids among severe COVID-19 patients: a systematic review and meta-analysis of randomized controlled trials. *Signal transduction and targeted therapy*. 2021;6(1):1-7.
146. Mackey K, King VJ, Gurley S, Kiefer M, Liederbauer E, Vela K, et al. Risks and impact of angiotensin-converting enzyme inhibitors or angiotensin-receptor blockers on SARS-CoV-2 infection in adults: a living systematic review. *Annals of internal medicine*. 2020;173(3):195-203.
147. Mahendiratta S, Bansal S, Sarma P, Kumar H, Choudhary G, Kumar S, et al. Stem cell therapy in COVID-19: Pooled evidence from SARS-CoV-2, SARS-CoV, MERS-CoV and ARDS: A systematic review. *Biomedicine & Pharmacotherapy*. 2021:111300.
148. Mahmud S, Nagraj S, Karia R, Karale S, Akku R, Mehra I, et al. 140: Efficacy and Safety of Tocilizumab in Hospitalized COVID-19 Patients: A Systematic Review. *Critical Care Medicine*. 2021;49(1):55.
149. Malaty M, Kayes T, Amarasekera AT, Kodsí M, MacIntyre CR, Tan TC. Incidence and treatment of arrhythmias secondary to coronavirus infection in humans: a systematic review. *European Journal of Clinical Investigation*. 2021;51(2):e13428.
150. Maldonado E, Tao D, Mackey K. Antithrombotic therapies in COVID-19 disease: a systematic review. *Journal of general internal medicine*. 2020:1-9.
151. Malgie J, Schoones JW, Pijls BG. Decreased mortality in coronavirus disease 2019 patients treated with tocilizumab: a rapid systematic review and meta-analysis of observational studies. *Clinical Infectious Diseases*. 2021;72(11):e742-e9.
152. Mansourabadi AH, Sadeghalvad M, Mohammadi-Motlagh H-R, Rezaei N. The immune system as a target for therapy of SARS-CoV-2: a systematic review of the current immunotherapies for COVID-19. *Life sciences*. 2020:118185.
153. Maraolo AE, Grossi A. Safety of hydroxychloroquine for treatment or prevention of SARS-CoV-2 infection: A rapid systematic review and meta-analysis of randomized clinical trials. *Immunity, inflammation and disease*. 2021;9(1):31-6.

**Comparative-effectiveness research of COVID-19 treatment: A rapid scoping review**

154. Mareev VY, Orlova YA, Pavlikova E, Matskeplishvili S, Krasnova T, Malahov P, et al. Steroid pulse-therapy in patients With coronaVirus Pneumonia (COVID-19), sYstemic inFLammation And Risk of vEnous thRombosis and thromboembolism (WAYFARER Study). *Kardiologiya*. 2020;60(6):15-29.
155. Matli K, Farah R, Maalouf M, Chamoun N, Costanian C, Ghanem G. Role of combining anticoagulant and antiplatelet agents in COVID-19 treatment: a rapid review. *Open heart*. 2021;8(1):e001628.
156. Mehra I, Mahapure K, Armaly P, Madas N, Shah V, Gupta I, et al. 146: Controversial Role of Corticosteroids on Mortality in COVID-19: Systematic Review and Meta-Analysis. *Critical Care Medicine*. 2021;49(1):58.
157. Meyerowitz EA, Sen P, Schoenfeld SR, Neilan TG, Frigault MJ, Stone JH, et al. Immunomodulation as Treatment for Severe Coronavirus Disease 2019: A Systematic Review of Current Modalities and Future Directions. *Clinical Infectious Diseases*. 2021;72(12):e1130-e43.
158. Meza N, Pérez-Bracchiglione J, Pérez I, Carvajal C, Ortiz-Muñoz L, Olgún P, et al. Angiotensin-converting-enzyme inhibitors and angiotensin II receptor blockers for COVID-19: A living systematic review of randomized clinical trials. *Medwave*. 2021;21(02).
159. Million M, Gautret P, Colson P, Roussel Y, Dubourg G, Chabriere E, et al. Clinical efficacy of chloroquine derivatives in COVID-19 infection: comparative meta-analysis between the big data and the real world. *New microbes and new infections*. 2020;38:100709.
160. Misra S, Nath M, Hadda V, Vibha D. Efficacy of various treatment modalities for nCOV- 2019: A systematic review and meta- analysis. *European Journal of Clinical Investigation*. 2020;50(11):e13383.
161. Misra S, Nath M, Hadda V, Vibha D. Effect of various treatment modalities on the novel coronavirus (nCOV-2019) infection in humans: a systematic review & meta-analysis. *medRxiv*. 2020.
162. Mohanty RR, Meher BR, Padhy BM, Das S. Repurposing Colchicine for the management of COVID-19: A systematic review and meta-analysis. *medRxiv*. 2021.
163. Moonla C, Sosothikul D, Chiasakul T, Rojnuckarin P, Uaprasert N. Anticoagulation and in-hospital mortality from coronavirus disease 2019: a systematic review and meta-analysis. *Clinical and Applied Thrombosis/Hemostasis*. 2021;27:10760296211008999.
164. Mori H, Ohkawara H, Togawa R, Rikimaru M, Shibata Y, Ikezoe T. Diagnosis and treatment of disseminated intravascular coagulation in COVID-19 patients: a scoping review. *International Journal of Hematology*. 2021:1-10.
165. Munir MA, Sarifuddin S, Basry A, Nayoan CR, Hardiyanti A, Cyio AD. Effectiveness of the Use of Dexamethasone in Treatment of Coronavirus Infections: A Systematic Review. *Open Access Macedonian Journal of Medical Sciences*. 2020;8(T1):518-21.
166. Musa A, Pendi K, Hashemi A, Warbasse E, Kouyoumjian S, Yousif J, et al. Remdesivir for the Treatment of COVID-19: A Systematic Review of the Literature. *Western Journal of Emergency Medicine*. 2020;21(4):737.
167. Nakhband A, Fakhari A, Azizi H. Interferon-beta offers promising avenues to COVID-19 treatment: a systematic review and meta-analysis of clinical trial studies. *Naunyn-schmiedeberg's Archives of Pharmacology*. 2021:1-10.

## Comparative-effectiveness research of COVID-19 treatment: A rapid scoping review

168. Nasir M, Talha K, Islam T, Saha S, Selina F, Parveen R. Use of Remdesivir in the Management of COVID-19: A Systematic Review on Current Evidences. *Mymensingh medical journal: MMJ*. 2020;29(2):481-7.
169. Nikniaz L, Akbarzadeh MA, Hosseinfard H, Hosseini M-S. The impact of vitamin D supplementation on mortality rate and clinical outcomes of COVID-19 patients: A systematic review and meta-analysis. *MedRxiv*. 2021.
170. Okoli GN, Rabbani R, Copstein L, Al-Juboori A, Askin N, Abou-Setta AM. Remdesivir for coronavirus disease 2019 (COVID-19): a systematic review with meta-analysis and trial sequential analysis of randomized controlled trials. *Infectious Diseases*. 2021:1-9.
171. Onorato D, Pucci M, Carpena G, Henry BM, Sanchis-Gomar F, Lippi G, editors. Protective effects of statins administration in European and North American patients infected with COVID-19: a meta-analysis. *Seminars in Thrombosis and Hemostasis*; 2021: Thieme Medical Publishers, Inc.
172. Oscanoa TJ, Vidal X, Kanters JK, Romero-Ortuno R. Frequency of long QT in patients with SARS-CoV-2 infection treated with hydroxychloroquine: a meta-analysis. *International journal of antimicrobial agents*. 2020;56(6):106212.
173. Padhy BM, Mohanty RR, Das S, Meher BR. Therapeutic potential of ivermectin as add on treatment in COVID 19: A systematic review and meta-analysis: Ivermectin in COVID-19: A meta-analysis. *Journal of Pharmacy & Pharmaceutical Sciences*. 2020;23:462-9.
174. Parisi R, Costanzo S, Di Castelnuovo A, De Gaetano G, Donati MB, Iacoviello L, editors. Different Anticoagulant Regimens, Mortality, and Bleeding in Hospitalized Patients with COVID-19: A Systematic Review and an Updated Meta-Analysis. *Seminars in Thrombosis and Hemostasis*; 2021: Thieme Medical Publishers, Inc.
175. Pasin L, Cavalli G, Navalesi P, Sella N, Landoni G, Yavorovskiy AG, et al. Anakinra for patients with COVID-19: a meta-analysis of non-randomized cohort studies. *European journal of internal medicine*. 2021;86:34-40.
176. Pasin L, Navalesi P, Zangrillo A, Kuzovlev A, Likhvantsev V, Hajjar LA, et al. Corticosteroids for patients with coronavirus disease 2019 (COVID-19) with different disease severity: a meta-analysis of randomized clinical trials. *Journal of cardiothoracic and vascular anesthesia*. 2021;35(2):578-84.
177. Patel TK, Barvaliya M, Kevadiya BD, Patel PB, Bhalla HL. Does adding of hydroxychloroquine to the standard care provide any benefit in reducing the mortality among COVID-19 patients?: a systematic review. *Journal of Neuroimmune Pharmacology*. 2020;15:350-8.
178. Patell R, Chiasakul T, Bauer E, Zwicker JI. Pharmacologic thromboprophylaxis and thrombosis in hospitalized patients with COVID-19: a pooled analysis. *Thrombosis and haemostasis*. 2021;121(01):076-85.
179. Pathak SK, Salunke AA, Thivari P, Pandey A, Nandy K, Ratna HV, et al. No benefit of hydroxychloroquine in COVID-19: results of systematic review and meta-analysis of randomized controlled trials". *Diabetes & Metabolic Syndrome: Clinical Research & Reviews*. 2020;14(6):1673-80.
180. Pei L, Zhang S, Huang L, Geng X, Ma L, Jiang W, et al. Antiviral agents, glucocorticoids, antibiotics, and intravenous immunoglobulin usage in 1142 patients with coronavirus disease 2019: a systematic review and meta-analysis. *Polish archives of internal medicine*. 2020.

**Comparative-effectiveness research of COVID-19 treatment: A rapid scoping review**

181. Peng HT, Rhind SG, Beckett A. Convalescent Plasma for the Prevention and Treatment of COVID-19: A Systematic Review and Quantitative Analysis. *JMIR public health and surveillance*. 2021;7(4):e25500.
182. Permana H, Huang I, Purwiga A, Kusumawardhani NY, Sihite TA, Martanto E, et al. In-hospital use of statins is associated with a reduced risk of mortality in coronavirus-2019 (COVID-19): systematic review and meta-analysis. *Pharmacological Reports*. 2021:1-12.
183. Perveen R, Nasir M, Talha K, Selina F, Islam M. Systematic review on current antiviral therapy in COVID-19 pandemic. *The Medical Journal of Malaysia*. 2020;75(6):710-6.
184. Piechotta V, Iannizzi C, Chai KL, Valk SJ, Kimber C, Dorando E, et al. Convalescent plasma or hyperimmune immunoglobulin for people with COVID-19: a living systematic review. *Cochrane Database of Systematic Reviews*. 2021(5).
185. Pimenoff VN, Elfstrom M, Dillner J. A systematic review of convalescent plasma treatment for COVID19. *medRxiv*. 2020.
186. Pimentel J, Laurie C, Cockcroft A, Andersson N. Clinical studies assessing the efficacy, effectiveness and safety of remdesivir in management of COVID-19: A scoping review. *British journal of clinical pharmacology*. 2021;87(7):2663-84.
187. Piscocya A, Ng-Sueng LF, Parra del Riego A, Cerna-Viacava R, Pasupuleti V, Roman YM, et al. Efficacy and harms of remdesivir for the treatment of COVID-19: a systematic review and meta-analysis. *PloS one*. 2020;15(12):e0243705.
188. Prakash A, Singh H, Kaur H, Semwal A, Sarma P, Bhattacharyya A, et al. Systematic review and meta-analysis of effectiveness and safety of favipiravir in the management of novel coronavirus (COVID-19) patients. *Indian Journal of Pharmacology*. 2020;52(5):414.
189. Prodromos CC, Rumschlag T, Perchyk T. Hydroxychloroquine is protective to the heart, not harmful: a systematic review. *New microbes and new infections*. 2020;37:100747.
190. Putman M, Chock YPE, Tam H, Kim AH, Sattui SE, Berenbaum F, et al. Antirheumatic disease therapies for the treatment of covid-19: a systematic review and meta-analysis. *Arthritis & Rheumatology*. 2021;73(1):36-47.
191. Qiu R, Li J, Xiao Y, Gao Z, Weng Y, Zhang Q, et al. The therapeutic effect and safety of the drugs for COVID-19: a systematic review and meta-analysis. *Medicine*. 2021;100(16).
192. Qu W, Wang Z, Hare JM, Bu G, Mallea JM, Pascual JM, et al. Cell-based therapy to reduce mortality from COVID-19: Systematic review and meta-analysis of human studies on acute respiratory distress syndrome. *Stem Cells Translational Medicine*. 2020;9(9):1007-22.
193. Rada G, Corbalán J, Rojas P. Cell-based therapies for COVID-19: A living systematic review. *medRxiv*. 2020.
194. Rajendran K, Krishnasamy N, Rangarajan J, Rathinam J, Natarajan M, Ramachandran A. Convalescent plasma transfusion for the treatment of COVID-19: Systematic review. *Journal of medical virology*. 2020;92(9):1475-83.
195. Raju R, Prajith V, Biatris PS. Therapeutic role of corticosteroids in COVID-19: a systematic review of registered clinical trials. *Future Journal of Pharmaceutical Sciences*. 2021;7(1):1-18.

## Comparative-effectiveness research of COVID-19 treatment: A rapid scoping review

196. Rakedzon S, Khoury Y, Rozenberg G, Neuberger A. Hydroxychloroquine and coronavirus disease 2019: a systematic review of a scientific failure. *Rambam Maimonides Medical Journal*. 2020;11(3).
197. Rakhmat II, Kusmala YY, Handayani DR, Juliastuti H, Nawangsih EN, Wibowo A, et al. Dipeptidyl peptidase-4 (DPP-4) inhibitor and mortality in coronavirus disease 2019 (COVID-19)—A systematic review, meta-analysis, and meta-regression. *Diabetes & Metabolic Syndrome: Clinical Research & Reviews*. 2021.
198. Razmi M, Hashemi F, Gheytauchi E, Manshadi MD, Ghods R, Madjd Z. Immunomodulatory-based therapy as a potential promising treatment strategy against severe COVID-19 patients: A systematic review. *International immunopharmacology*. 2020;88:106942.
199. Ren L, Xu W, Overton JL, Yu S, Chiamvimonvat N, Thai PN. Assessment of Hydroxychloroquine and Chloroquine Safety Profiles-A Systematic Review and Meta-Analysis. *MedRxiv*. 2020.
200. Ren L, Xu W, Overton JL, Yu S, Chiamvimonvat N, Thai PN. Assessment of Chloroquine and Hydroxychloroquine Safety Profiles: A Systematic Review and Meta-Analysis. *Frontiers in pharmacology*. 2020;11.
201. Rezaei S, Fatemi B, Karimi Majd Z, Minaei H, Peikanpour M, Anjidani N, et al. Efficacy and safety of Tocilizumab in severe and critical COVID-19: A Systematic Review and Meta-Analysis. *Expert review of clinical immunology*. 2021;17(5):499-511.
202. Rezagholizadeh A, Khiali S, Sarbakhsh P, Entezari-Maleki T. Remdesivir for treatment of COVID-19; an updated systematic review and meta-analysis. *European journal of pharmacology*. 2021:173926.
203. Robinson R, Prakash V, Al Tamimi R, Albast N, Al-Bast B. Impact of systemic corticosteroids on hospitalized patients with COVID-19: January 2021 Meta-analysis of randomized controlled trials. *medRxiv*. 2021.
204. Rodrigo C, Fernando SD, Rajapakse S. Clinical evidence for repurposing chloroquine and hydroxychloroquine as antiviral agents: a systematic review. *Clinical Microbiology and Infection*. 2020;26(8):979-87.
205. Rodriguez-Guerra M, Jadhav P, Vittorio TJ. Current treatment in COVID-19 disease: a rapid review. *Drugs in Context*. 2021;10.
206. Roshanshad A, Kamalipour A, Ashraf MA, Roshanshad R, Akbari M. Remdesivir efficacy in coronavirus disease 2019 (COVID-19): A systematic review. *medRxiv*. 2020.
207. Rubio-Rivas M, Mora-Lujan JM, Montero A, Homs NA, Rello J, Corbella X. Beneficial and harmful outcomes of tocilizumab in severe COVID-19: a systematic review and meta-analysis. *medRxiv*. 2020.
208. Salah HM, Mehta JL. Meta-Analysis of the Effect of Aspirin on Mortality in COVID-19. *American Journal of Cardiology*. 2021;142:158-9.
209. Salah HM, Mehta JL. Meta-analysis of the Effect of Colchicine on Mortality and Mechanical Ventilation in COVID-19. *American Journal of Cardiology*. 2021;145:170-2.



**Comparative-effectiveness research of COVID-19 treatment: A rapid scoping review**

210. Salah HM, Naser JA, Calcaterra G, Bassareo PP, Mehta JL. The effect of anticoagulation use on mortality in COVID-19 infection. *American Journal of Cardiology*. 2020;134:155-7.
211. Sarfraz A, Sarfraz Z, Marcos Sanchez-Gonzalez JM, Michel G, Frontela O, Posada J, et al. Randomized controlled trials of remdesivir in hospitalized coronavirus disease 2019 patients: A meta-analysis. *Turkish Journal of Emergency Medicine*. 2021;21(2):43.
212. Sarfraz A, Sarfraz Z, Sanchez-Gonzalez M, Michel J, Michel G, Frontela O, et al. Randomized Controlled Trials of Remdesivir in Hospitalized COVID-19 Patients: A Systematic Review and Meta-Analysis. *medRxiv*. 2020.
213. Sarfraz A, Sarfraz Z, Sarfraz M, Aftab H, Pervaiz Z. Tocilizumab and COVID-19: a meta-analysis of 2120 patients with severe disease and implications for clinical trial methodologies. *Turkish journal of medical sciences*. 2021;51(3):890-7.
214. Sarkar S, Khanna P, Soni KD. Are the steroids a blanket solution for COVID- 19? A systematic review and meta- analysis. *Journal of Medical Virology*. 2021;93(3):1538-47.
215. Sarkar S, Soni KD, Khanna P. Convalescent plasma is a clutch at straws in COVID- 19 management! A systematic review and meta- analysis. *Journal of medical virology*. 2021;93(2):1111-8.
216. Sarma P, Bhattacharyya A, Kaur H, Prajapat M, Prakash A, Kumar S, et al. Efficacy and safety of steroid therapy in COVID-19: A rapid systematic review and Meta-analysis. *Indian Journal of Pharmacology*. 2020;52(6):535.
217. Sarma P, Kaur H, Kumar H, Mahendru D, Avti P, Bhattacharyya A, et al. Virological and clinical cure in COVID- 19 patients treated with hydroxychloroquine: a systematic review and meta- analysis. *Journal of medical virology*. 2020;92(7):776-85.
218. Schoot TS, Kerckhoffs AP, Hilbrands LB, Van Marum RJ. Immunosuppressive drugs and COVID-19: a review. *Frontiers in pharmacology*. 2020;11:1333.
219. Seirafianpour F, Mozafarpour S, Fattahi N, Sadeghzadeh- Bazargan A, Hanifiha M, Goodarzi A. Treatment of COVID- 19 with pentoxifylline: Could it be a potential adjuvant therapy? *Dermatologic Therapy*. 2020;33(4):e13733.
220. Selvaraj V, Khan MS, Bavishi C, Dapaah-Afriyie K, Finn A, Lal A, et al. Tocilizumab in hospitalized patients with COVID-19: A meta analysis of randomized controlled trials. *Lung*. 2021:1-10.
221. Sethia R, Prasad M, Jagannath S, Nischal N, Soneja M, Garg P. Efficacy of famotidine for COVID-19: a systematic review and meta-analysis. *medRxiv*. 2020.
222. Setyawat T, Nugraha AS. Effectiveness of Dexamethasone for Acute Respiratory Distress Syndrome (ARDS) due to Coronavirus: A Systematic Review. *European Journal of Molecular & Clinical Medicine*. 2020;7(8):206-11.
223. Shah S, Shah K, Turagam MK, Lakkireddy D, Garg J. Effects of Hydroxychloroquine With or Without Azithromycin on QT Interval in COVID-19: A Systematic Review. *Electrophysiology Collaborative Consortium for Meta-analysis—Electram Investigators*. *American Journal of Therapeutics*. 2021.

## Comparative-effectiveness research of COVID-19 treatment: A rapid scoping review

224. Shamshirian A, Hessami A, Heydari K, Alizadeh-Navaei R, Ebrahimzadeh MA, Yip GW, et al. The role of hydroxychloroquine in COVID-19 treatment: a systematic review and meta-analysis. *Ann Acad Med Singap.* 2020;49:789-800.
225. Shao S, Wang Y, Kang H, Tong Z. Effect of convalescent blood products for patients with severe acute respiratory infections of viral etiology: a systematic review and meta-analysis. *International Journal of Infectious Diseases.* 2021;102:397-411.
226. Shi Q, Zhou Q, Wang X, Liao J, Yu Y, Wang Z, et al. Potential effectiveness and safety of antiviral agents in children with coronavirus disease 2019: a rapid review and meta-analysis. *Annals of translational medicine.* 2020;8(10).
227. Shrestha DB, Budhathoki P, Khadka S, Shah PB, Pokharel N, Rashmi P. Favipiravir versus other antiviral or standard of care for COVID-19 treatment: a rapid systematic review and meta-analysis. *Virology journal.* 2020;17(1):1-15.
228. Shrestha DB, Budhathoki P, Rawal E, Raut S, Khadka S. Remdesivir: a potential game-changer or just a myth? A systematic review and meta-analysis. *Life sciences.* 2021;264:118663.
229. Shuto H, Komiya K, Yamasue M, Uchida S, Ogura T, Mukae H, et al. A systematic review of corticosteroid treatment for noncritically ill patients with COVID-19. *Scientific reports.* 2020;10(1):1-8.
230. Siemieniuk RA, Bartoszko JJ, Ge L, Zeraatkar D, Izcovich A, Kum E, et al. Drug treatments for covid-19: living systematic review and network meta-analysis. *Bmj.* 2020;370.
231. Simmons B, Wentzel H, Mobarak S, Eslami G, Sadeghi A, Ali Asgari A, et al. Sofosbuvir/daclatasvir regimens for the treatment of COVID-19: an individual patient data meta-analysis. *Journal of Antimicrobial Chemotherapy.* 2021;76(2):286-91.
232. Singh AK, Majumdar S, Singh R, Misra A. Role of corticosteroid in the management of COVID-19: A systemic review and a Clinician's perspective. *Diabetes & Metabolic Syndrome: Clinical Research & Reviews.* 2020;14(5):971-8.
233. Singh AK, Singh A, Singh R, Misra A. Remdesivir in COVID-19: a critical review of pharmacology, pre-clinical and clinical studies. *Diabetes & Metabolic Syndrome: Clinical Research & Reviews.* 2020;14(4):641-8.
234. Singh AK, Singh A, Singh R, Misra A. Hydroxychloroquine in patients with COVID-19: A Systematic Review and meta-analysis. *Diabetes & Metabolic Syndrome: Clinical Research & Reviews.* 2020;14(4):589-96.
235. Singh B, Ryan H, Kredo T, Chaplin M, Fletcher T. Chloroquine or hydroxychloroquine for prevention and treatment of COVID- 19. *The Cochrane database of systematic reviews.* 2020;2020(4).
236. Singh S, Moore TJ. Efficacy and Safety of Hydroxychloroquine and Chloroquine for COVID-19: A systematic review. *medRxiv.* 2020.
237. Siordia JA, Bernaba M, Yoshino K, Ulhaque A, Kumar S, Bernaba M, et al. Systematic and statistical review of coronavirus disease 19 treatment trials. *SN Comprehensive Clinical Medicine.* 2020:1-12.

**Comparative-effectiveness research of COVID-19 treatment: A rapid scoping review**

238. Sridharan GK, Vegunta R, Rokkam VRP, Aravamudan VM, Vegunta R, Khan SR, et al. Venous thromboembolism in hospitalized COVID-19 patients. *American Journal of Therapeutics*. 2020;27(6):e599-e610.
239. Stack M, Sacco K, Castagnoli R, Livinski AA, Notarangelo LD, Lionakis MS. BTK inhibitors for Severe Acute Respiratory Syndrome Coronavirus 2 (SARS-CoV-2): A Systematic Review. *Research Square*. 2021:rs. 3. rs-319342.
240. Sterne JA, Murthy S, Diaz JV, Slutsky AS, Villar J, Angus DC, et al. Association between administration of systemic corticosteroids and mortality among critically ill patients with COVID-19: a meta-analysis. *Jama*. 2020;324(13):1330-41.
241. Sun C, Chen Y, Hu L, Wu Y, Liang M, Ahmed MA, et al. Does Famotidine reduce the risk of progression to severe disease, death, and intubation for COVID-19 patients? A systemic review and meta-analysis. *Digestive diseases and sciences*. 2021:1-9.
242. Sun M, Xu Y, He H, Zhang L, Wang X, Qiu Q, et al. A potentially effective treatment for COVID-19: A systematic review and meta-analysis of convalescent plasma therapy in treating severe infectious disease. *International Journal of Infectious Diseases*. 2020;98:334-46.
243. Taher M, Tik N, Susanti D. Drugs intervention study in COVID-19 management. *Drug Metabolism and Personalized Therapy*. 2021;36(2):87-98.
244. Takla M, Jeevaratnam K. Chloroquine, hydroxychloroquine, and COVID-19: systematic review and narrative synthesis of efficacy and safety. *Saudi Pharmaceutical Journal*. 2020.
245. Talaie H, Hosseini SM, Nazari M, Fakhri Y, Mousavizadeh A, Vatanpour H, et al. Is there any potential management against COVID-19? A systematic review and meta-analysis. *DARU Journal of Pharmaceutical Sciences*. 2020:1-13.
246. Talasaz AH, Sadeghipour P, Aghakouchakzadeh M, Dreyfus I, Kakavand H, Ariannejad H, et al. Lipid-Modulating Agents for Prevention or Treatment of COVID-19 in Randomized Trials. *medRxiv*. 2021.
247. Tharmarajah E, Buazon A, Patel V, Hannah JR, Adas M, Allen VB, et al. IL-6 inhibition in the treatment of COVID-19: A meta-analysis and meta-regression. *Journal of Infection*. 2021;82(5):178-85.
248. Thibault F, Guihur A, Rebeaud M, Mulot M, Mahamat-Saleh Y. Hydroxychloroquine and mortality risk of patients with COVID-19: a systematic review and meta-analysis of human comparative studies. *medRxiv*. 2020.
249. Thoguluva Chandrasekar V, Venkatesalu B, Patel HK, Spadaccini M, Manteuffel J, Ramesh M. Systematic review and meta- analysis of effectiveness of treatment options against SARS- CoV- 2 infection. *Journal of medical virology*. 2021;93(2):775-85.
250. Tlayjeh H, Mhish O, Enani M, Alruwaili A, Tleyjeh R, Thalib L, et al. Efficacy of Corticosteroids in COVID-19 Patients: A Systematic Review and Meta-Analysis. *medRxiv*. 2020.
251. Tlayjeh H, Mhish OH, Enani MA, Alruwaili A, Tleyjeh R, Thalib L, et al. Association of corticosteroids use and outcomes in COVID-19 patients: A systematic review and meta-analysis. *Journal of infection and public health*. 2020.

## Comparative-effectiveness research of COVID-19 treatment: A rapid scoping review

252. Tleyjeh IM, Kashour Z, AlDosary O, Riaz M, Tlayjeh H, Garbati MA, et al. Cardiac toxicity of chloroquine or hydroxychloroquine in patients with COVID-19: a systematic review and meta-regression analysis. *Mayo Clinic Proceedings: Innovations, Quality & Outcomes*. 2021;5(1):137-50.
253. Tleyjeh IM, Kashour Z, AlDosary O, Riaz M, Tlayjeh H, Garbati MA, et al. Cardiac toxicity of chloroquine or hydroxychloroquine in patients with COVID-19: a systematic review and meta-regression analysis. *Mayo Clinic Proceedings: Innovations, Quality & Outcomes*. 2021;5(1):137-50.
254. Tleyjeh IM, Kashour Z, Damraj M, Riaz M, Tlayjeh H, Altannir M, et al. Efficacy and safety of tocilizumab in COVID-19 patients: a living systematic review and meta-analysis. *Clinical Microbiology and Infection*. 2021;27(2):215-27.
255. Tleyjeh IM, Kashour Z, Damraj M, Riaz M, Tlayjeh H, Altannir M, et al. Efficacy and safety of tocilizumab in COVID-19 patients: a living systematic review and meta-analysis. *Clinical Microbiology and Infection*. 2021;27(2):215-27.
256. Torres ZA, Lopez-Leon S, Muthuvel T, Manivannan S, Srivastava K, Pavesi M. Safety and Efficacy of Antiviral Drugs for the Treatment of Patients with SARS-CoV-2 Infection: A Systematic Review and Meta-analyses. *medRxiv*. 2020.
257. Tritschler T, Mathieu ME, Skeith L, Rodger M, Middeldorp S, Brighton T, et al. Anticoagulant interventions in hospitalized patients with COVID- 19: A scoping review of randomized controlled trials and call for international collaboration. *Journal of thrombosis and haemostasis*. 2020;18(11):2958-67.
258. Uaprasert N, Moonla C, Sosothikul D, Rojnuckarin P, Chiasakul T. Systemic coagulopathy in hospitalized patients with coronavirus disease 2019: A systematic review and meta-analysis. *Clinical and Applied Thrombosis/Hemostasis*. 2021;27:1076029620987629.
259. Ullah W, Abdullah HM, Roomi S, Sattar Y, Almas T, Gowda SN, et al. Safety and efficacy of hydroxychloroquine in COVID-19: a systematic review and meta-analysis. *Journal of clinical medicine research*. 2020;12(8):483.
260. Valk SJ, Piechotta V, Chai KL, Doree C, Monsef I, Wood EM, et al. Convalescent plasma or hyperimmune immunoglobulin for people with COVID- 19: a rapid review. *Cochrane Database of Systematic Reviews*. 2020(5).
261. van Paassen J, Vos JS, Hoekstra EM, Neumann KM, Boot PC, Arbous SM. Corticosteroid use in COVID-19 patients: a systematic review and meta-analysis on clinical outcomes. *Critical Care*. 2020;24(1):1-22.
262. Vargas M, Servillo G, Einav S. Lopinavir/ritonavir for the treatment of SARS, MERS and COVID-19: a systematic review. *Eur Rev Med Pharmacol Sci*. 2020;24(16):8592-605.
263. Vegivinti CT, Pederson JM, Saravu K, Gupta N, Evanson KW, Kamrowski S, et al. Efficacy of convalescent plasma therapy for COVID- 19: A systematic review and meta- analysis. *Journal of clinical apheresis*. 2021.
264. Vegivinti CTR, Pederson JM, Saravu K, Gupta N, Barrett A, Davis AR, et al. Remdesivir therapy in patients with COVID-19: A systematic review and meta-analysis of randomized controlled trials. *Annals of Medicine and Surgery*. 2021.

**Comparative-effectiveness research of COVID-19 treatment: A rapid scoping review**

265. Venkatesulu BP, Thoguluva Chandrasekar V, Giridhar P, Patel HK, Manteuffel J. The mechanistic rationale of drugs, primary endpoints, geographical distribution of clinical trials against severe acute respiratory syndrome-related coronavirus- 2: A systematic review. *Journal of medical virology*. 2021;93(2):843-53.
266. Verdugo-Paiva F, Acuña MP, Solá I, Rada G. Remdesivir for the treatment of COVID-19: a living systematic review. *medRxiv*. 2020.
267. Veronese N, Demurtas J, Yang L, Tonelli R, Barbagallo M, Lopalco P, et al. Use of corticosteroids in coronavirus disease 2019 pneumonia: a systematic review of the literature. *Frontiers in medicine*. 2020;7:170.
268. Viswanatha GL, Male CKA, Shylaja H. Efficacy and safety of tocilizumab in the management of COVID-19: A systematic review and meta-analysis of observational studies. *medRxiv*. 2021.
269. Vrachatis DA, Giannopoulos GV, Giotaki SG, Raisakis K, Kossyvakis C, Iliodromitis KE, et al. Impact of colchicine on mortality in patients with COVID-19. A meta-analysis. *Hellenic Journal of Cardiology*. 2021.
270. Wadaa-Allah A, Emhamed MS, Sadeq MA, Ben Hadj Dahman N, Ullah I, Farrag NS, et al. Efficacy of the current investigational drugs for the treatment of COVID-19: a scoping review. *Annals of medicine*. 2021;53(1):318-34.
271. Walz L, Cohen AJ, Rebaza AP, Vanchieri J, Slade MD, Cruz CSD, et al. Janus kinase-inhibitor and type I interferon ability to produce favorable clinical outcomes in COVID-19 patients: a systematic review and meta-analysis. *MedRxiv*. 2020.
272. Walz L, Cohen AJ, Rebaza AP, Vanchieri J, Slade MD, Cruz CSD, et al. JAK-inhibitor and type I interferon ability to produce favorable clinical outcomes in COVID-19 patients: a systematic review and meta-analysis. *BMC infectious diseases*. 2021;21(1):1-10.
273. Wang D, Fu B, Peng Z, Yang D, Han M, Li M, et al. Tocilizumab in patients with moderate or severe COVID-19: a randomized, controlled, open-label, multicenter trial. *Frontiers of medicine*. 2021:1-9.
274. Wang M, Wu T, Zuo Z, You Y, Yang X, Pan L, et al. Evaluation of current medical approaches for COVID-19: a systematic review and meta-analysis. *BMJ Supportive & Palliative Care*. 2021;11(1):45-52.
275. Wang Y, Ao G, Nasr B, Qi X. Effect of antiplatelet treatments on patients with COVID-19 infection: A systematic review and meta-analysis. *The American journal of emergency medicine*. 2021.
276. Wang Y, Huo P, Dai R, Lv X, Yuan S, Zhang Y, et al. Convalescent plasma may be a possible treatment for COVID-19: a systematic review. *International immunopharmacology*. 2021;91:107262.
277. Welte T, Ambrose LJ, Sibbring GC, Sheikh S, Müllerová H, Sabir I. Current evidence for COVID-19 therapies: a systematic literature review. *European Respiratory Review*. 2021;30(159).
278. Wenjing L, Yuanzheng F, Li J-Y, Tang LV, Yu H. Safety and efficacy of convalescent plasma therapy in severely and critically ill patients with COVID-19: a systematic review with meta-analysis. *Aging (Albany NY)*. 2021;13(1):1498.

**Comparative-effectiveness research of COVID-19 treatment: A rapid scoping review**

279. Wijaya I, Andhika R, Huang I. The use of therapeutic-dose anticoagulation and its effect on mortality in patients with COVID-19: a systematic review. *Clinical and Applied Thrombosis/Hemostasis*. 2020;26:1076029620960797.
280. Wijaya I, Andhika R, Huang I, Purwiga A, Budiman KY, Bashari MH, et al. The use of Janus Kinase inhibitors in hospitalized patients with COVID-19: Systematic review and meta-analysis. *Clinical epidemiology and global health*. 2021:100755.
281. Wilt TJ, Kaka AS, MacDonald R, Greer N, Obley A, Duan-Porter W. Remdesivir for adults with COVID-19: a living systematic review for American College of Physicians practice points. *Annals of internal medicine*. 2021;174(2):209-20.
282. Wooding DJ, Bach H. Treatment of COVID-19 with convalescent plasma: lessons from past coronavirus outbreaks. *Clinical Microbiology and Infection*. 2020.
283. Wu L, Zheng Y, Liu J, Luo R, Wu D, Xu P, et al. Comprehensive evaluation of the efficacy and safety of LPV/r drugs in the treatment of SARS and MERS to provide potential treatment options for COVID-19. *Aging (Albany NY)*. 2021;13(8):10833.
284. Xu J, Teng Y, Shang L, Gu X, Fan G, Chen Y, et al. The effect of prior ACEI/ARB treatment on COVID-19 susceptibility and outcome: a systematic review and meta-analysis. *Clinical Infectious Diseases*. 2020.
285. Yamaji N, Ohde S, Kobayashi-Cuya KE, Saito S, Takahashi O. Current Evidence of the Pharmacological Treatments for Novel Coronavirus Disease 2019 (COVID-19) A Scoping Review. *medRxiv*. 2020.
286. Yang J-W, Yang L, Luo R-G, Xu J-F. Corticosteroid administration for viral pneumonia: COVID-19 and beyond. *Clinical Microbiology and Infection*. 2020;26(9):1171-7.
287. Yang T-H, Chou C-Y, Yang Y-F, Chien C-S, Yarmishyn AA, Yang T-Y, et al. Systematic review and meta-analysis of the effectiveness and safety of hydroxychloroquine in treating COVID-19 patients. *Journal of the Chinese Medical Association*. 2021;84(2):233-41.
288. Yang Z, Liu J, Zhou Y, Zhao X, Zhao Q, Liu J. The effect of corticosteroid treatment on patients with coronavirus infection: a systematic review and meta-analysis. *Journal of Infection*. 2020;81(1):e13-e20.
289. Ye Z, Wang Y, Colunga-Lozano LE, Prasad M, Tangamornsuksan W, Rochweg B, et al. Efficacy and safety of corticosteroids in COVID-19 based on evidence for COVID-19, other coronavirus infections, influenza, community-acquired pneumonia and acute respiratory distress syndrome: a systematic review and meta-analysis. *Cmaj*. 2020;192(27):E756-E67.
290. Yokoyama Y, Briasoulis A, Takagi H, Kuno T. Effect of remdesivir on patients with COVID-19: A network meta-analysis of randomized control trials. *Virus research*. 2020;288:198137.
291. Yousefifard M, Ali KM, Aghaei A, Zali A, Neishaboori AM, Zarghi A, et al. Corticosteroids on the management of coronavirus disease 2019 (COVID-19): a systemic review and meta-analysis. *Iranian Journal of Public Health*. 2020;49(8):1411.

**Comparative-effectiveness research of COVID-19 treatment: A rapid scoping review**

- 1  
2  
3 292. Yousefifard M, Zali A, Ali KM, Neishaboori AM, Zarghi A, Hosseini M, et al. Antiviral therapy  
4 in management of COVID-19: a systematic review on current evidence. *Archives of academic emergency*  
5 *medicine*. 2020;8(1).  
6
- 7 293. Yousefifard M, Zali A, Zarghi A, Madani Neishaboori A, Hosseini M, Safari S. Non- steroidal  
8 anti- inflammatory drugs in management of COVID- 19; a systematic review on current evidence.  
9 *International Journal of Clinical Practice*. 2020;74(9):e13557.  
10
- 11 294. Zaffanello M, Piacentini G, Nosetti L, Franchini M. The use of convalescent plasma for pediatric  
12 patients with SARS-CoV-2: A systematic literature review. *Transfusion and Apheresis Science*.  
13 2020:103043.  
14
- 15 295. Zang Y, Han X, He M, Shi J, Li Y. Hydroxychloroquine use and progression or prognosis of  
16 COVID-19: a systematic review and meta-analysis. *Naunyn-Schmiedeberg's archives of pharmacology*.  
17 2021;394(4):775-82.  
18
- 19 296. Zeng J, Yin S, Du X, Song T, Lin T. What convalescent plasma in treating severe acute  
20 respiratory infections of viral aetiology can hint for COVID-19? Evidence from a meta-analysis.  
21 *Transfusion Clinique et Biologique*. 2021.  
22
- 23 297. Zhan Y, Shang J, Gu Y, Huang Q, Xie J. Efficacy of corticosteroid in patients with COVID- 19:  
24 A multi- center retrospective study and meta- analysis. *Journal of Medical Virology*. 2021;93(7):4292-  
25 302.  
26
- 27 298. Zhang C, Jin H, Wen Y, Yin G. A systematic review and network meta-analysis for COVID-19  
28 treatments. *MedRxiv*. 2020.  
29
- 30 299. Zhang J, Yang Y, Yang N, Ma Y, Zhou Q, Li W, et al. Effectiveness of intravenous  
31 immunoglobulin for children with severe COVID-19: a rapid review. *Annals of translational medicine*.  
32 2020;8(10).  
33
- 34 300. Zhang X, Li X, Fang P, Yan D, Qiuzhen Y, Minjuan S, et al. Convalescent plasma in the  
35 treatment of severe covid-19: A systematic review and meta-analysis. *Iranian Journal of Public Health*.  
36 2020;49(11):2022.  
37
- 38 301. Zhao M, Lu J, Tang Y, Dai Y, Zhou J, Wu Y. Tocilizumab for treating COVID-19: a systemic  
39 review and meta-analysis of retrospective studies. *European journal of clinical pharmacology*.  
40 2021;77(3):311-9.  
41
- 42 302. Zhong H, Wang Y, Zhang Z-L, Liu Y-X, Le K-J, Cui M, et al. Efficacy and safety of current  
43 therapeutic options for COVID-19-lessons to be learnt from SARS and MERS epidemic: A systematic  
44 review and meta-analysis. *Pharmacological research*. 2020;157:104872.  
45
- 46 303. Zuniga RAA, Villoria RAMG, Elizondo MV, Osorio AYN, Coca SM. Clinical effectiveness of  
47 convalescent plasma in hospitalized patients with COVID-19: a systematic review and meta-analysis.  
48 *medRxiv*. 2021.  
49  
50  
51  
52  
53  
54  
55  
56  
57  
58  
59  
60

Comparative-effectiveness research of COVID-19 treatment: A rapid scoping review

Appendix 6. Additional details for the Results section

Figure A1. Word cloud of description of study participants

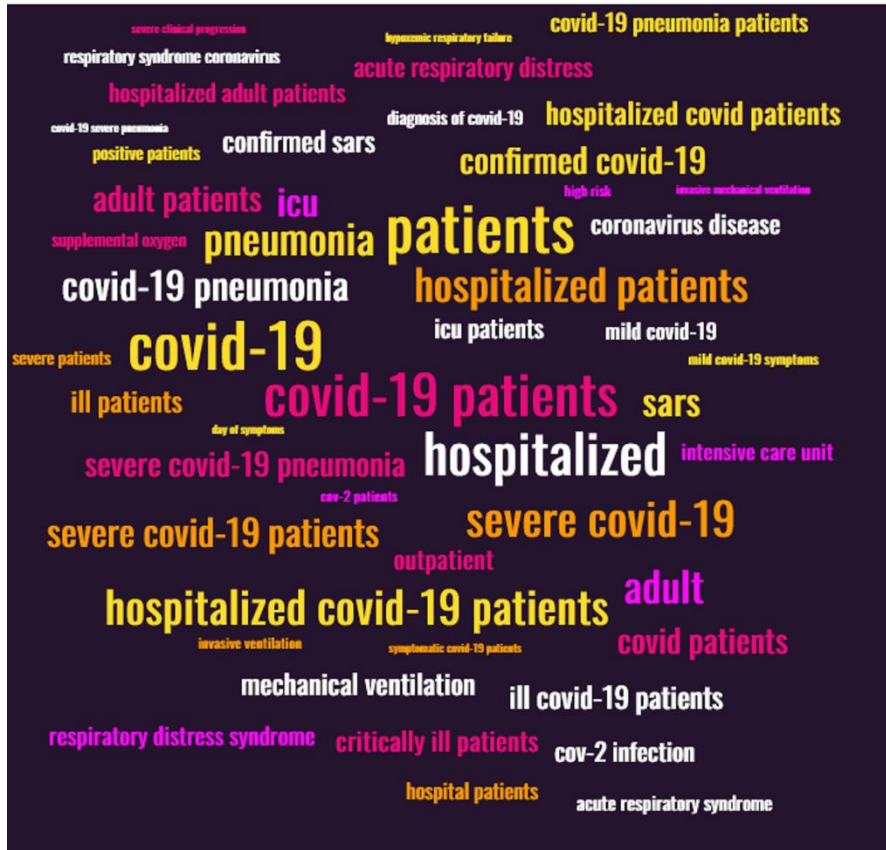

Peer Review Only



## Comparative-effectiveness research of COVID-19 treatment: A rapid scoping review

Table A1. Country of primary study conduct

| Country              | Total      | RCT        | Non-RCT    |
|----------------------|------------|------------|------------|
| <b>Total</b>         | <b>630</b> | <b>190</b> | <b>440</b> |
| United States        | 166 (26%)  | 38 (20%)   | 128 (29%)  |
| China                | 109 (17%)  | 27 (14%)   | 82 (19%)   |
| Italy                | 48 (8%)    | 2 (1%)     | 46 (10%)   |
| France               | 41 (7%)    | 5 (3%)     | 36 (8%)    |
| Spain                | 41 (7%)    | 3 (2%)     | 38 (9%)    |
| India                | 24 (4%)    | 16 (8%)    | 8 (2%)     |
| Iran                 | 21 (3%)    | 15 (8%)    | 6 (1%)     |
| United Kingdom       | 21 (3%)    | 19 (10%)   | 2 (0%)     |
| Brazil               | 17 (3%)    | 13 (7%)    | 4 (1%)     |
| Mexico               | 12 (2%)    | 6 (3%)     | 6 (1%)     |
| Turkey               | 12 (2%)    | 1 (1%)     | 11 (3%)    |
| Argentina            | 10 (2%)    | 7 (4%)     | 3 (1%)     |
| The Netherlands      | 8 (1%)     | 2 (1%)     | 6 (1%)     |
| Greece               | 6 (1%)     | 2 (1%)     | 4 (1%)     |
| Pakistan             | 6 (1%)     | 4 (2%)     | 2 (0%)     |
| Russia               | 6 (1%)     | 1 (1%)     | 5 (1%)     |
| Belgium              | 5 (1%)     | 1 (1%)     | 4 (1%)     |
| Egypt                | 5 (1%)     | 4 (2%)     | 1 (0%)     |
| Saudia Arabia        | 5 (1%)     | 0 (0%)     | 5 (1%)     |
| Bangladesh           | 4 (1%)     | 2 (1%)     | 2 (0%)     |
| Singapore            | 4 (1%)     | 0 (0%)     | 4 (1%)     |
| South Korea          | 4 (1%)     | 0 (0%)     | 4 (1%)     |
| United Arab Emirates | 4 (1%)     | 0 (0%)     | 4 (1%)     |
| Bahrain              | 3 (0%)     | 2 (1%)     | 1 (0%)     |
| Canada               | 3 (0%)     | 3 (2%)     | 0 (0%)     |
| Cuba                 | 3 (0%)     | 1 (1%)     | 2 (0%)     |
| Denmark              | 3 (0%)     | 2 (1%)     | 1 (0%)     |
| Germany              | 3 (0%)     | 1 (1%)     | 2 (0%)     |
| Iraq                 | 3 (0%)     | 2 (1%)     | 1 (0%)     |
| Oman                 | 3 (0%)     | 1 (1%)     | 2 (0%)     |
| Poland               | 3 (0%)     | 0 (0%)     | 3 (1%)     |
| Austria              | 2 (0%)     | 0 (0%)     | 2 (0%)     |
| Chile                | 2 (0%)     | 2 (1%)     | 0 (0%)     |
| Ireland              | 2 (0%)     | 0 (0%)     | 2 (0%)     |
| Israel               | 2 (0%)     | 0 (0%)     | 2 (0%)     |
| Qatar                | 2 (0%)     | 1 (1%)     | 1 (0%)     |
| Sweden               | 2 (0%)     | 0 (0%)     | 2 (0%)     |
| Australia            | 1 (0%)     | 1 (1%)     | 0 (0%)     |
| Columbia             | 1 (0%)     | 1 (1%)     | 0 (0%)     |
| Hong Kong            | 1 (0%)     | 0 (0%)     | 1 (0%)     |
| Indonesia            | 1 (0%)     | 1 (1%)     | 0 (0%)     |
| Kuwait               | 1 (0%)     | 0 (0%)     | 1 (0%)     |
| Nigeria              | 1 (0%)     | 1 (1%)     | 0 (0%)     |
| Norway               | 1 (0%)     | 1 (1%)     | 0 (0%)     |
| Peru                 | 1 (0%)     | 0 (0%)     | 1 (0%)     |
| Philippines          | 1 (0%)     | 0 (0%)     | 1 (0%)     |
| Romania              | 1 (0%)     | 0 (0%)     | 1 (0%)     |
| Suriname             | 1 (0%)     | 0 (0%)     | 1 (0%)     |
| Switzerland          | 1 (0%)     | 0 (0%)     | 1 (0%)     |
| Taiwan               | 1 (0%)     | 1 (1%)     | 0 (0%)     |

**Comparative-effectiveness research of COVID-19 treatment: A rapid scoping review**

| <b>Country</b>     | <b>Total</b> | <b>RCT</b> | <b>Non-RCT</b> |
|--------------------|--------------|------------|----------------|
| <b>Total</b>       | <b>630</b>   | <b>190</b> | <b>440</b>     |
| Thailand           | 1 (0%)       | 0 (0%)     | 1 (0%)         |
| WHO - 30 countries | 1 (0%)       | 1 (1%)     | 0 (0%)         |

For peer review only

## Comparative-effectiveness research of COVID-19 treatment: A rapid scoping review

Table A2. Treatment evaluated in primary studies

|                                 | <b>Total</b> | <b>RCT</b> | <b>Non-RCT</b> |
|---------------------------------|--------------|------------|----------------|
| <b>Total</b>                    | <b>630</b>   | <b>190</b> | <b>440</b>     |
| Tocilizumab                     | 87 (14%)     | 12 (6%)    | 75 (17%)       |
| Hydroxychloroquine              | 78 (12%)     | 22 (12%)   | 56 (13%)       |
| Convalescent Plasma             | 55 (9%)      | 15 (8%)    | 40 (9%)        |
| Steroid                         | 37 (6%)      | 1 (1%)     | 36 (8%)        |
| Lopinavir/Ritonavir             | 29 (5%)      | 5 (3%)     | 24 (5%)        |
| Methylprednisolone              | 26 (4%)      | 3 (2%)     | 23 (5%)        |
| Remdesivir                      | 25 (4%)      | 16 (8%)    | 9 (2%)         |
| Enoxaparin                      | 18 (3%)      | 1 (1%)     | 17 (4%)        |
| Hydroxychloroquine/Azithromycin | 18 (3%)      | 2 (1%)     | 16 (4%)        |
| Anakinra                        | 16 (3%)      | 2 (1%)     | 14 (3%)        |
| Dexamethasone                   | 16 (3%)      | 4 (2%)     | 12 (3%)        |
| Anticoagulant-Therapeutic       | 15 (2%)      | 2 (1%)     | 13 (3%)        |
| Azithromycin                    | 15 (2%)      | 6 (3%)     | 9 (2%)         |
| Anticoagulant-Prophylactic      | 11 (2%)      | 0 (0%)     | 11 (3%)        |
| Ivermectin                      | 11 (2%)      | 9 (5%)     | 2 (0%)         |
| Heparin                         | 9 (1%)       | 0 (0%)     | 9 (2%)         |
| Favipiravir                     | 8 (1%)       | 6 (3%)     | 2 (0%)         |
| Sarilumab                       | 8 (1%)       | 7 (4%)     | 1 (0%)         |
| Colchicine                      | 7 (1%)       | 4 (2%)     | 3 (1%)         |
| Glucocorticoids                 | 7 (1%)       | 0 (0%)     | 7 (2%)         |
| Bamlanivimab                    | 6 (1%)       | 4 (2%)     | 2 (0%)         |
| Chloroquine                     | 6 (1%)       | 2 (1%)     | 4 (1%)         |
| Intravenous Immunoglobulin      | 6 (1%)       | 4 (2%)     | 2 (0%)         |
| Mesenchymal Stem Cells          | 6 (1%)       | 4 (2%)     | 2 (0%)         |
| Steroid                         | 6 (1%)       | 0 (0%)     | 6 (1%)         |
| Thymosin-Alpha1                 | 6 (1%)       | 1 (1%)     | 5 (1%)         |

## Comparative-effectiveness research of COVID-19 treatment: A rapid scoping review

|                                        | <b>Total</b> | <b>RCT</b> | <b>Non-RCT</b> |
|----------------------------------------|--------------|------------|----------------|
| <b>Total</b>                           | <b>630</b>   | <b>190</b> | <b>440</b>     |
| Vitamin C                              | 6 (1%)       | 4 (2%)     | 2 (0%)         |
| Antiviral                              | 5 (1%)       | 0 (0%)     | 5 (1%)         |
| Arbidol                                | 5 (1%)       | 2 (1%)     | 3 (1%)         |
| Aspirin                                | 5 (1%)       | 0 (0%)     | 5 (1%)         |
| Interferon                             | 5 (1%)       | 3 (2%)     | 2 (0%)         |
| Prednisone                             | 5 (1%)       | 1 (1%)     | 4 (1%)         |
| Statins                                | 5 (1%)       | 0 (0%)     | 5 (1%)         |
| Antibiotic                             | 4 (1%)       | 0 (0%)     | 4 (1%)         |
| Anticoagulant                          | 4 (1%)       | 0 (0%)     | 4 (1%)         |
| Hydrocortisone                         | 4 (1%)       | 2 (1%)     | 2 (0%)         |
| Lopinavir/Ritonavir/Hydroxychloroquine | 4 (1%)       | 0 (0%)     | 4 (1%)         |
| Ribavirin                              | 4 (1%)       | 0 (0%)     | 4 (1%)         |
| Therapeutic Plasma Exchange            | 4 (1%)       | 0 (0%)     | 4 (1%)         |
| Vitamin D                              | 4 (1%)       | 3 (2%)     | 1 (0%)         |
| Acei Arb                               | 3 (0%)       | 0 (0%)     | 3 (1%)         |
| Baricitinib                            | 3 (0%)       | 1 (1%)     | 2 (0%)         |
| Casirivimab/Imdevimab                  | 3 (0%)       | 2 (1%)     | 1 (0%)         |
| Famotidine                             | 3 (0%)       | 0 (0%)     | 3 (1%)         |
| Interferon-Alpha-2b                    | 3 (0%)       | 0 (0%)     | 3 (1%)         |
| Interferon Alpha-2b                    | 3 (0%)       | 1 (1%)     | 2 (0%)         |
| Lenzilumab                             | 3 (0%)       | 2 (1%)     | 1 (0%)         |
| Lopinavir/Ritonavir/Interferon-Alpha   | 3 (0%)       | 0 (0%)     | 3 (1%)         |
| Neutralizing Antibody                  | 3 (0%)       | 1 (1%)     | 2 (0%)         |
| Zinc Iv                                | 3 (0%)       | 3 (2%)     | 0 (0%)         |
| Acei Arb Statin                        | 2 (0%)       | 0 (0%)     | 2 (0%)         |
| Avifavir                               | 2 (0%)       | 2 (1%)     | 0 (0%)         |

**Comparative-effectiveness research of COVID-19 treatment: A rapid scoping review**

|                                                  | <b>Total</b> | <b>RCT</b> | <b>Non-RCT</b> |
|--------------------------------------------------|--------------|------------|----------------|
| <b>Total</b>                                     | <b>630</b>   | <b>190</b> | <b>440</b>     |
| Canakinumab                                      | 2 (0%)       | 0 (0%)     | 2 (0%)         |
| Ceftriaxone                                      | 2 (0%)       | 0 (0%)     | 2 (0%)         |
| Chlorpromazine                                   | 2 (0%)       | 0 (0%)     | 2 (0%)         |
| Corticosteroids/Tocilizumab                      | 2 (0%)       | 0 (0%)     | 2 (0%)         |
| Darunavir/Cobicistat                             | 2 (0%)       | 1 (1%)     | 1 (0%)         |
| Fondaparinux                                     | 2 (0%)       | 0 (0%)     | 2 (0%)         |
| Functional Inhibition Of Acid Sphingomyelinase   | 2 (0%)       | 0 (0%)     | 2 (0%)         |
| Haloperidol                                      | 2 (0%)       | 0 (0%)     | 2 (0%)         |
| Heparin-Prophylaxis                              | 2 (0%)       | 0 (0%)     | 2 (0%)         |
| Inhaled Budesonide                               | 2 (0%)       | 2 (1%)     | 0 (0%)         |
| Interferon Beta-1b                               | 2 (0%)       | 0 (0%)     | 2 (0%)         |
| Interferon Kappa/Trefoil Factor 2                | 2 (0%)       | 2 (1%)     | 0 (0%)         |
| Interferon Lambda-1a                             | 2 (0%)       | 2 (1%)     | 0 (0%)         |
| Interlukin-6 Inhibitors                          | 2 (0%)       | 0 (0%)     | 2 (0%)         |
| Itolizumab                                       | 2 (0%)       | 2 (1%)     | 0 (0%)         |
| Ivermectin/Doxycycline                           | 2 (0%)       | 2 (1%)     | 0 (0%)         |
| Leflunomide                                      | 2 (0%)       | 0 (0%)     | 2 (0%)         |
| Lopinavir                                        | 2 (0%)       | 2 (1%)     | 0 (0%)         |
| Lopinavir/Ritonavir/Azithromycine                | 2 (0%)       | 2 (1%)     | 0 (0%)         |
| Lopinavir/Ritonavir/Doxycycline                  | 2 (0%)       | 2 (1%)     | 0 (0%)         |
| Lopinavir/Ritonavir/Ribavirin/Interferon Beta-1b | 2 (0%)       | 1 (1%)     | 1 (0%)         |
| Mavrilimumab                                     | 2 (0%)       | 1 (1%)     | 1 (0%)         |
| Methylprednisolone/Tocilizumab                   | 2 (0%)       | 0 (0%)     | 2 (0%)         |
| Neuromuscular Blocking Agents                    | 2 (0%)       | 0 (0%)     | 2 (0%)         |
| Nitazoxanide                                     | 2 (0%)       | 2 (1%)     | 0 (0%)         |
| Oseltamivir                                      | 2 (0%)       | 0 (0%)     | 2 (0%)         |

## Comparative-effectiveness research of COVID-19 treatment: A rapid scoping review

|                                                        | <b>Total</b> | <b>RCT</b> | <b>Non-RCT</b> |
|--------------------------------------------------------|--------------|------------|----------------|
| <b>Total</b>                                           | <b>630</b>   | <b>190</b> | <b>440</b>     |
| Prednisolone                                           | 2 (0%)       | 0 (0%)     | 2 (0%)         |
| Ribavirin/Interferon-Alpha                             | 2 (0%)       | 0 (0%)     | 2 (0%)         |
| Statin                                                 | 2 (0%)       | 0 (0%)     | 2 (0%)         |
| Stem Cell Nebulization                                 | 2 (0%)       | 0 (0%)     | 2 (0%)         |
| Steroid-Pulse                                          | 2 (0%)       | 0 (0%)     | 2 (0%)         |
| Tocilizumab/Methylprednisolone                         | 2 (0%)       | 0 (0%)     | 2 (0%)         |
| Tocilizumab/Steroid                                    | 2 (0%)       | 0 (0%)     | 2 (0%)         |
| Umifenovir                                             | 2 (0%)       | 0 (0%)     | 2 (0%)         |
| Vitamin C/Zinc                                         | 2 (0%)       | 2 (1%)     | 0 (0%)         |
| Acyclovir                                              | 1 (0%)       | 0 (0%)     | 1 (0%)         |
| Amantadine                                             | 1 (0%)       | 0 (0%)     | 1 (0%)         |
| Amoxicillin                                            | 1 (0%)       | 0 (0%)     | 1 (0%)         |
| Anakinra/Intravenous Immunoglobulin                    | 1 (0%)       | 0 (0%)     | 1 (0%)         |
| Anakinra/Methylprednisolone                            | 1 (0%)       | 0 (0%)     | 1 (0%)         |
| Antiviral/Antiviral/Antibiotics                        | 1 (0%)       | 0 (0%)     | 1 (0%)         |
| Apixaban-Prophylaxis                                   | 1 (0%)       | 0 (0%)     | 1 (0%)         |
| Apixaban-Therapeutic                                   | 1 (0%)       | 0 (0%)     | 1 (0%)         |
| Aprepitant                                             | 1 (0%)       | 1 (1%)     | 0 (0%)         |
| Arbidol/Hydroxychloroquine/Lopinavir/Ritonavir         | 1 (0%)       | 0 (0%)     | 1 (0%)         |
| Artemisinin-Piperaquine                                | 1 (0%)       | 0 (0%)     | 1 (0%)         |
| Auxora                                                 | 1 (0%)       | 1 (1%)     | 0 (0%)         |
| Azithromycin/Hydroxychloroquine                        | 1 (0%)       | 0 (0%)     | 1 (0%)         |
| Azithromycin/Prednisolone/Naproxen/Lopinavir/Ritonavir | 1 (0%)       | 0 (0%)     | 1 (0%)         |
| Azvudine                                               | 1 (0%)       | 1 (1%)     | 0 (0%)         |
| Bacillus Calmette–Guérin Vaccine                       | 1 (0%)       | 1 (1%)     | 0 (0%)         |
| Baloxavir Marboxil                                     | 1 (0%)       | 1 (1%)     | 0 (0%)         |

## Comparative-effectiveness research of COVID-19 treatment: A rapid scoping review

|                                                     | <b>Total</b> | <b>RCT</b> | <b>Non-RCT</b> |
|-----------------------------------------------------|--------------|------------|----------------|
| <b>Total</b>                                        | <b>630</b>   | <b>190</b> | <b>440</b>     |
| Bamlanivimab/Etesevimab                             | 1 (0%)       | 1 (1%)     | 0 (0%)         |
| Baricitinib/Remdesivir                              | 1 (0%)       | 1 (1%)     | 0 (0%)         |
| Berinerit                                           | 1 (0%)       | 0 (0%)     | 1 (0%)         |
| Betamethasone                                       | 1 (0%)       | 1 (1%)     | 0 (0%)         |
| Bevacizumab                                         | 1 (0%)       | 0 (0%)     | 1 (0%)         |
| Bromhexine/Hydrochloride                            | 1 (0%)       | 1 (1%)     | 0 (0%)         |
| Bromhexine/Hydrochloride/Antiviral                  | 1 (0%)       | 1 (1%)     | 0 (0%)         |
| Bromhexine/Spirolactone                             | 1 (0%)       | 0 (0%)     | 1 (0%)         |
| Camostat Mesilate                                   | 1 (0%)       | 1 (1%)     | 0 (0%)         |
| Cerc-002                                            | 1 (0%)       | 1 (1%)     | 0 (0%)         |
| Choloroquine                                        | 1 (0%)       | 1 (1%)     | 0 (0%)         |
| Cigb-325                                            | 1 (0%)       | 1 (1%)     | 0 (0%)         |
| Clarithromycin                                      | 1 (0%)       | 0 (0%)     | 1 (0%)         |
| Corticosteroid/Tocilizumab                          | 1 (0%)       | 0 (0%)     | 1 (0%)         |
| Corticosteroid/Lopinavir/Ritonavir/Interferon Alpha | 1 (0%)       | 0 (0%)     | 1 (0%)         |
| Corticosteroid/Ns-Immunosuppresant                  | 1 (0%)       | 0 (0%)     | 1 (0%)         |
| Corticosteroids/Anakinra                            | 1 (0%)       | 0 (0%)     | 1 (0%)         |
| Corticosteroids/Baricitinib                         | 1 (0%)       | 0 (0%)     | 1 (0%)         |
| Cotrimoxazole                                       | 1 (0%)       | 0 (0%)     | 1 (0%)         |
| Cyclooxygenase-2                                    | 1 (0%)       | 0 (0%)     | 1 (0%)         |
| Cyclosporine A                                      | 1 (0%)       | 0 (0%)     | 1 (0%)         |
| Dexamethasone/Tofacitinib                           | 1 (0%)       | 0 (0%)     | 1 (0%)         |
| Diphenhydramine/Ammonium Chloride                   | 1 (0%)       | 1 (1%)     | 0 (0%)         |
| Doxycycline                                         | 1 (0%)       | 1 (1%)     | 0 (0%)         |
| Dutasteride                                         | 1 (0%)       | 1 (1%)     | 0 (0%)         |
| Eculizumab                                          | 1 (0%)       | 0 (0%)     | 1 (0%)         |

## Comparative-effectiveness research of COVID-19 treatment: A rapid scoping review

|                                                                                           | <b>Total</b> | <b>RCT</b> | <b>Non-RCT</b> |
|-------------------------------------------------------------------------------------------|--------------|------------|----------------|
| <b>Total</b>                                                                              | <b>630</b>   | <b>190</b> | <b>440</b>     |
| Epoprostenol - Aerosolized                                                                | 1 (0%)       | 0 (0%)     | 1 (0%)         |
| Equine Polyclonal Antibodies                                                              | 1 (0%)       | 1 (1%)     | 0 (0%)         |
| Favipiravir/Chloroquine Hydroxychloroquine/Lopinavir/<br>Ritonavir Or Darunavir/Ritonavir | 1 (0%)       | 0 (0%)     | 1 (0%)         |
| Favipiravir/Chloroquine Hydroxychloroquine/Lopinavir/<br>Ritonavir Darunavir/Ritonavir    | 1 (0%)       | 0 (0%)     | 1 (0%)         |
| Favipiravir/Interferon Beta-1b                                                            | 1 (0%)       | 1 (1%)     | 0 (0%)         |
| Firazyr                                                                                   | 1 (0%)       | 0 (0%)     | 1 (0%)         |
| Flash Frozen Plasma                                                                       | 1 (0%)       | 1 (1%)     | 0 (0%)         |
| Fluticasone Spray/Triamcinolone                                                           | 1 (0%)       | 0 (0%)     | 1 (0%)         |
| Fluvoxamine                                                                               | 1 (0%)       | 1 (1%)     | 0 (0%)         |
| Glucocorticoids/Interferon                                                                | 1 (0%)       | 0 (0%)     | 1 (0%)         |
| Hydroxychloroquine Or Chloroquine                                                         | 1 (0%)       | 0 (0%)     | 1 (0%)         |
| Hydroxychloroquine/Lopinavir/Ritonavir                                                    | 1 (0%)       | 0 (0%)     | 1 (0%)         |
| Hydroxychloroquine/Lopinavir/Ritonavir/Azithromycin                                       | 1 (0%)       | 1 (1%)     | 0 (0%)         |
| Hydroxychloroquine/Favipiravir                                                            | 1 (0%)       | 0 (0%)     | 1 (0%)         |
| Hydroxychloroquine/Lopinavir/Ritonavir                                                    | 1 (0%)       | 0 (0%)     | 1 (0%)         |
| Hydroxyzine                                                                               | 1 (0%)       | 0 (0%)     | 1 (0%)         |
| Inhaled Adenosine                                                                         | 1 (0%)       | 0 (0%)     | 1 (0%)         |
| Inhaled Corticosteroid                                                                    | 1 (0%)       | 0 (0%)     | 1 (0%)         |
| Inhaled Nitric Oxide                                                                      | 1 (0%)       | 1 (1%)     | 0 (0%)         |
| Interferon-B 1a/Lopinavir/Ritonavir                                                       | 1 (0%)       | 0 (0%)     | 1 (0%)         |
| Interferon Alpha-2b/Arbidol                                                               | 1 (0%)       | 0 (0%)     | 1 (0%)         |
| Interferon Alpha-2b/Lopinavir/Ritonavir                                                   | 1 (0%)       | 0 (0%)     | 1 (0%)         |
| Interferon Beta-1a                                                                        | 1 (0%)       | 1 (1%)     | 0 (0%)         |
| Itraconazole                                                                              | 1 (0%)       | 1 (1%)     | 0 (0%)         |
| Ivermectin/Azithromycin                                                                   | 1 (0%)       | 0 (0%)     | 1 (0%)         |



**Comparative-effectiveness research of COVID-19 treatment: A rapid scoping review**

|                                                                       | <b>Total</b> | <b>RCT</b> | <b>Non-RCT</b> |
|-----------------------------------------------------------------------|--------------|------------|----------------|
| <b>Total</b>                                                          | <b>630</b>   | <b>190</b> | <b>440</b>     |
| Leflunomide/Interferon Alpha 2a                                       | 1 (0%)       | 1 (1%)     | 0 (0%)         |
| Levamisole                                                            | 1 (0%)       | 1 (1%)     | 0 (0%)         |
| Levofloxacin                                                          | 1 (0%)       | 0 (0%)     | 1 (0%)         |
| Linezolid                                                             | 1 (0%)       | 0 (0%)     | 1 (0%)         |
| Lopinavir/Hydroxychloroquine                                          | 1 (0%)       | 0 (0%)     | 1 (0%)         |
| Lopinavir/Ritonavir Or<br>Hydroxychloroquine+Prednisone               | 1 (0%)       | 0 (0%)     | 1 (0%)         |
| Lopinavir/Ritonavir/Arbidol                                           | 1 (0%)       | 0 (0%)     | 1 (0%)         |
| Lopinavir/Ritonavir/Chloroquine                                       | 1 (0%)       | 0 (0%)     | 1 (0%)         |
| Lopinavir/Ritonavir/Interferon                                        | 1 (0%)       | 0 (0%)     | 1 (0%)         |
| Lopinavir/Ritonavir/Interferon-<br>Alpha/Abidor Ribavirin Chloroquine | 1 (0%)       | 0 (0%)     | 1 (0%)         |
| Lopinavir/Ritonavir/Interferon Beta-2b                                | 1 (0%)       | 0 (0%)     | 1 (0%)         |
| Lopinavir/Ritonavir/Interferon/Arbidol                                | 1 (0%)       | 0 (0%)     | 1 (0%)         |
| Lopinavir/Ritonavir/Novaféron                                         | 1 (0%)       | 0 (0%)     | 1 (0%)         |
| Lopinavir/Ritonavir/Novaféron/Interferon                              | 1 (0%)       | 0 (0%)     | 1 (0%)         |
| Losartan                                                              | 1 (0%)       | 1 (1%)     | 0 (0%)         |
| Meplazumab                                                            | 1 (0%)       | 0 (0%)     | 1 (0%)         |
| Meropenem                                                             | 1 (0%)       | 0 (0%)     | 1 (0%)         |
| Mesenchymal Stromal Cells                                             | 1 (0%)       | 0 (0%)     | 1 (0%)         |
| Methylprednisolone/Dexamethasone                                      | 1 (0%)       | 0 (0%)     | 1 (0%)         |
| Methylprednisolone/Ivig                                               | 1 (0%)       | 1 (1%)     | 0 (0%)         |
| Multi-Mechanism Approach                                              | 1 (0%)       | 0 (0%)     | 1 (0%)         |
| Nebulised Interferon Beta-1a                                          | 1 (0%)       | 1 (1%)     | 0 (0%)         |
| Nitazoxanide/Azithromycin                                             | 1 (0%)       | 1 (1%)     | 0 (0%)         |
| Nitazoxanide/Doxycycline                                              | 1 (0%)       | 1 (1%)     | 0 (0%)         |
| Olokizumab                                                            | 1 (0%)       | 0 (0%)     | 1 (0%)         |

## Comparative-effectiveness research of COVID-19 treatment: A rapid scoping review

|                                                          | <b>Total</b> | <b>RCT</b> | <b>Non-RCT</b> |
|----------------------------------------------------------|--------------|------------|----------------|
| <b>Total</b>                                             | <b>630</b>   | <b>190</b> | <b>440</b>     |
| Opaganib                                                 | 1 (0%)       | 0 (0%)     | 1 (0%)         |
| Otilimab                                                 | 1 (0%)       | 1 (1%)     | 0 (0%)         |
| Pentoxifylline                                           | 1 (0%)       | 1 (1%)     | 0 (0%)         |
| Pipamperone And Citalopram                               | 1 (0%)       | 1 (1%)     | 0 (0%)         |
| Piperacillin                                             | 1 (0%)       | 0 (0%)     | 1 (0%)         |
| Polymerized-Collagen                                     | 1 (0%)       | 1 (1%)     | 0 (0%)         |
| Poractant Alfa                                           | 1 (0%)       | 0 (0%)     | 1 (0%)         |
| Progesterone                                             | 1 (0%)       | 1 (1%)     | 0 (0%)         |
| Prophylactic Anticoagulant                               | 1 (0%)       | 0 (0%)     | 1 (0%)         |
| Proxalutamide                                            | 1 (0%)       | 1 (1%)     | 0 (0%)         |
| Pyridostigmine                                           | 1 (0%)       | 1 (1%)     | 0 (0%)         |
| Recombinant Interleukin-2                                | 1 (0%)       | 0 (0%)     | 1 (0%)         |
| Remdesivir/Corticosteroid                                | 1 (0%)       | 0 (0%)     | 1 (0%)         |
| Ribavarin/Lopinavir/Ritonavir/Interferon-Alpha           | 1 (0%)       | 0 (0%)     | 1 (0%)         |
| Ribavirin/Arbidol/Hydroxichloroquine/Lopinavir/Ritonavir | 1 (0%)       | 0 (0%)     | 1 (0%)         |
| Ribavirin/Hydroxichloroquine/Lopinavir/Ritonavir         | 1 (0%)       | 0 (0%)     | 1 (0%)         |
| Rimantadine                                              | 1 (0%)       | 0 (0%)     | 1 (0%)         |
| Ruxolitinib                                              | 1 (0%)       | 0 (0%)     | 1 (0%)         |
| Sofosbuvir/Daclatasvir                                   | 1 (0%)       | 1 (1%)     | 0 (0%)         |
| Sofosbuvir/Daclatasvir/Hydroxychloroquine                | 1 (0%)       | 1 (1%)     | 0 (0%)         |
| Sofosbuvir/Ledipasvir                                    | 1 (0%)       | 1 (1%)     | 0 (0%)         |
| Soludexide                                               | 1 (0%)       | 1 (1%)     | 0 (0%)         |
| Sulodexide                                               | 1 (0%)       | 1 (1%)     | 0 (0%)         |
| Telmisartan                                              | 1 (0%)       | 1 (1%)     | 0 (0%)         |
| Theophylline/Pentoxifylline                              | 1 (0%)       | 0 (0%)     | 1 (0%)         |
| Tocilizumab/Convalescent Plasma                          | 1 (0%)       | 0 (0%)     | 1 (0%)         |

**Comparative-effectiveness research of COVID-19 treatment: A rapid scoping review**

|                                           | <b>Total</b> | <b>RCT</b> | <b>Non-RCT</b> |
|-------------------------------------------|--------------|------------|----------------|
| <b>Total</b>                              | <b>630</b>   | <b>190</b> | <b>440</b>     |
| Tocilizumab/Favipiravir                   | 1 (0%)       | 1 (1%)     | 0 (0%)         |
| Toxilizumab/Steroids/Anakinra/Baricitinib | 1 (0%)       | 0 (0%)     | 1 (0%)         |
| Triazavirin                               | 1 (0%)       | 1 (1%)     | 0 (0%)         |
| Vermeclin/Doxycycline                     | 1 (0%)       | 1 (1%)     | 0 (0%)         |
| Vilobelimab                               | 1 (0%)       | 1 (1%)     | 0 (0%)         |
| Vitamin D/Magnesium/Vitamin B12           | 1 (0%)       | 0 (0%)     | 1 (0%)         |
| Vitamins/Dietary Supplements              | 1 (0%)       | 0 (0%)     | 1 (0%)         |
| Zanamivir                                 | 1 (0%)       | 0 (0%)     | 1 (0%)         |

## Comparative-effectiveness research of COVID-19 treatment: A rapid scoping review

Table A3. Treatment type of single treatment

|                                 | <b>Total</b> | <b>RCT</b> | <b>Non-RCT</b> |
|---------------------------------|--------------|------------|----------------|
| <b>Total</b>                    | <b>712</b>   | <b>202</b> | <b>510</b>     |
| Non-Steroidal Immunosuppressant | 126 (18%)    | 27 (13%)   | 99 (19%)       |
| Steroid                         | 110 (15%)    | 15 (7%)    | 95 (19%)       |
| Antiviral                       | 97 (14%)     | 40 (20%)   | 57 (11%)       |
| Antimalaria                     | 87 (12%)     | 25 (12%)   | 62 (12%)       |
| Anticoagulant                   | 66 (5%)      | 5 (3%)     | 61 (12%)       |
| Anticoagulant-Therapeutic       | 17 (2%)      | 2 (1%)     | 15 (3%)        |
| Anticoagulant-Prophylactic      | 14 (2%)      | 0 (0%)     | 14 (3%)        |
| Convalescent Plasma             | 56 (8%)      | 16 (8%)    | 40 (8%)        |
| Antibiotic                      | 29 (4%)      | 7 (3%)     | 22 (4%)        |
| Anti- Inflammatory              | 20 (3%)      | 8 (4%)     | 12 (2%)        |
| Interferon Therapy              | 16 (2%)      | 7 (3%)     | 9 (2%)         |
| Antiparasitic                   | 14 (2%)      | 12 (6%)    | 2 (0%)         |
| Immunomodulator                 | 14 (2%)      | 4 (2%)     | 10 (2%)        |
| Neutralizing Antibodies         | 13 (2%)      | 7 (3%)     | 6 (1%)         |
| Mesenchymal Stem Cells          | 9 (1%)       | 4 (2%)     | 5 (1%)         |
| Statin                          | 7 (1%)       | 0 (0%)     | 7 (1%)         |
| Intravenous Immunoglobulin      | 6 (1%)       | 4 (2%)     | 2 (0%)         |
| Vitamin C                       | 6 (1%)       | 4 (2%)     | 2 (0%)         |
| Antihistamine                   | 4 (1%)       | 0 (0%)     | 4 (1%)         |
| Antipsychotic                   | 4 (1%)       | 0 (0%)     | 4 (1%)         |
| Vitamin D                       | 4 (1%)       | 3 (1%)     | 1 (0%)         |

## Comparative-effectiveness research of COVID-19 treatment: A rapid scoping review

Table A4. Treatment type of combination treatment

|                                                          | <b>Total</b> | <b>RCT</b> | <b>Non-RCT</b> |
|----------------------------------------------------------|--------------|------------|----------------|
| <b>Total</b>                                             | <b>116</b>   | <b>29</b>  | <b>87</b>      |
| Antimalaria/Antibiotic                                   | 19 (16%)     | 2 (7%)     | 17 (20%)       |
| Steroid/NS-Immunosuppressant                             | 10 (9%)      | 0 (0%)     | 10 (11%)       |
| Antimalaria/Antiviral/Antiviral                          | 8 (7%)       | 1 (3%)     | 7 (8%)         |
| Antiviral/Antiviral                                      | 5 (4%)       | 3 (10%)    | 2 (2%)         |
| Antiviral/Interferon                                     | 5 (4%)       | 0 (0%)     | 5 (6%)         |
| Antimalaria/Antiviral                                    | 4 (3%)       | 0 (0%)     | 4 (5%)         |
| Antimalaria/Antiviral/Antibiotic                         | 4 (3%)       | 4 (14%)    | 0 (0%)         |
| Antiparasitic/Antibiotic                                 | 4 (3%)       | 3 (10%)    | 1 (1%)         |
| Antiviral/Antiviral/Antiviral                            | 4 (3%)       | 0 (0%)     | 4 (5%)         |
| Antiviral/Antiviral/Antiviral/Interferon                 | 4 (3%)       | 0 (0%)     | 4 (5%)         |
| Antiviral/NS-Immunosuppressant                           | 4 (3%)       | 3 (10%)    | 1 (1%)         |
| NS-Immunosuppressant/Steroid                             | 4 (3%)       | 0 (0%)     | 4 (5%)         |
| ACEI/ARB                                                 | 3 (3%)       | 0 (0%)     | 3 (3%)         |
| Antiviral/Antibiotic                                     | 3 (3%)       | 2 (7%)     | 1 (1%)         |
| Antiviral/Antiviral/Interferon                           | 3 (3%)       | 1 (3%)     | 2 (2%)         |
| ACEI/ARB/Statin                                          | 2 (2%)       | 0 (0%)     | 2 (2%)         |
| Antimalaria/Antiviral/NS-Immunosuppressant               | 2 (2%)       | 0 (0%)     | 2 (2%)         |
| Antiviral/Anti-Inflammatory                              | 2 (2%)       | 2 (7%)     | 0 (0%)         |
| Steroid/Steroid                                          | 2 (2%)       | 0 (0%)     | 2 (2%)         |
| Vitamin C/Zinc                                           | 2 (2%)       | 2 (7%)     | 0 (0%)         |
| Anticoagulant/Ns-Immunosuppressant                       | 1 (1%)       | 0 (0%)     | 1 (1%)         |
| Antihistamine/Disinfectant                               | 1 (1%)       | 1 (3%)     | 0 (0%)         |
| Antimalaria/Mucolytic                                    | 2 (2%)       | 1 (3%)     | 1 (1%)         |
| Antimalaria/Antiviral/Antiviral/Antibiotic               | 1 (1%)       | 1 (3%)     | 0 (0%)         |
| Antimalaria/Antiviral/Antiviral/Antiviral                | 1 (1%)       | 0 (0%)     | 1 (1%)         |
| Antimalaria/Antiviral/Antiviral/Interferon               | 1 (1%)       | 0 (0%)     | 1 (1%)         |
| Antimalaria/Antiviral/Mucolytic                          | 1 (1%)       | 1 (3%)     | 0 (0%)         |
| Antiviral/Antiviral/Antibiotic/Anti-Inflammatory/Steroid | 1 (1%)       | 0 (0%)     | 1 (1%)         |
| Antiviral/Antiviral/Antimalaria/Steroid                  | 1 (1%)       | 0 (0%)     | 1 (1%)         |
| Antiviral/Immunomodulator                                | 1 (1%)       | 1 (3%)     | 0 (0%)         |
| Antiviral/Interferon/Steroid                             | 1 (1%)       | 0 (0%)     | 1 (1%)         |
| Antiviral/Steroid                                        | 1 (1%)       | 0 (0%)     | 1 (1%)         |
| Bronchodilator/Hemorrhologic Agent                       | 1 (1%)       | 0 (0%)     | 1 (1%)         |
| Mucolytic/Diuretic                                       | 1 (1%)       | 0 (0%)     | 1 (1%)         |
| NS-Immunosuppressant/Convalescent Plasma                 | 1 (1%)       | 0 (0%)     | 1 (1%)         |
| NS-Immunosuppressants/IVIG                               | 1 (1%)       | 0 (0%)     | 1 (1%)         |
| Steroid/Anti-Inflammatory                                | 1 (1%)       | 0 (0%)     | 1 (1%)         |
| Steroid/Interferon                                       | 1 (1%)       | 0 (0%)     | 1 (1%)         |
| Steroid/IVIG                                             | 1 (1%)       | 1 (3%)     | 0 (0%)         |
| Vitamin D/Magnesium/Vitamin B12                          | 1 (1%)       | 0 (0%)     | 1 (1%)         |

**Comparative-effectiveness research of COVID-19 treatment: A rapid scoping review**

|                              | <b>Total</b> | <b>RCT</b> | <b>Non-RCT</b> |
|------------------------------|--------------|------------|----------------|
| <b>Total</b>                 | <b>116</b>   | <b>29</b>  | <b>87</b>      |
| Vitamins/Dietary Supplements | 1 (1%)       | 0 (0%)     | 1 (1%)         |

Note: NS-immunosuppressant: non-steroidal immunosuppressant. ACEI/ARB: angiotensin-converting enzyme (ACE) inhibitor and an angiotensin receptor blocker (ARB). IVIG: Intravenous immune globulin.

For peer review only

## Comparative-effectiveness research of COVID-19 treatment: A rapid scoping review

Table A5. Country of knowledge synthesis conduct

|                   | All      | With protocol | Without protocol |
|-------------------|----------|---------------|------------------|
| <b># reviews</b>  | 303      | 89            | 214              |
| 1. United States  | 59 (19%) | 13 (15%)      | 46 (21%)         |
| 2. China          | 41 (14%) | 13 (15%)      | 28 (13%)         |
| 3. India          | 34 (11%) | 12 (13%)      | 22 (10%)         |
| 4. Iran           | 18 (6%)  | 3 (3%)        | 15 (7%)          |
| 4. United Kingdom | 18 (6%)  | 3 (3%)        | 15 (7%)          |
| 5. Saudi Arabia   | 13 (4%)  | 1 (1%)        | 12 (6%)          |
| 6. Canada         | 12 (4%)  | 5 (6%)        | 7 (3%)           |
| 7. Italy          | 12 (4%)  | 8 (9%)        | 4 (2%)           |
| 8. Indonesia      | 9 (3%)   | 2 (2%)        | 7 (3%)           |
| 9. Malaysia       | 7 (2%)   | 0 (0%)        | 7 (3%)           |
| 10. France        | 6 (2%)   | 4 (4%)        | 2 (1%)           |
| Egypt             | 5 (2%)   | 2 (2%)        | 3 (1%)           |
| Peru              | 5 (2%)   | 1 (1%)        | 4 (2%)           |
| Taiwan            | 5 (2%)   | 1 (1%)        | 4 (2%)           |
| Australia         | 4 (1%)   | 1 (1%)        | 3 (1%)           |
| Brazil            | 4 (1%)   | 1 (1%)        | 3 (1%)           |
| Chile             | 4 (1%)   | 4 (4%)        | 0 (0%)           |
| Japan             | 4 (1%)   | 2 (2%)        | 2 (1%)           |
| Nepal             | 4 (1%)   | 0 (0%)        | 4 (2%)           |
| Spain             | 4 (1%)   | 1 (1%)        | 3 (1%)           |
| Bangladesh        | 3 (1%)   | 0 (0%)        | 3 (1%)           |
| Greece            | 3 (1%)   | 1 (1%)        | 2 (1%)           |
| Korea             | 3 (1%)   | 1 (1%)        | 2 (1%)           |
| Pakistan          | 3 (1%)   | 0 (0%)        | 3 (1%)           |
| The Netherlands   | 3 (1%)   | 1 (1%)        | 2 (1%)           |
| Denmark           | 2 (1%)   | 1 (1%)        | 1 (0%)           |
| Germany           | 2 (1%)   | 2 (2%)        | 0 (0%)           |
| Israel            | 2 (1%)   | 1 (1%)        | 1 (0%)           |
| Lebanon           | 2 (1%)   | 0 (0%)        | 2 (1%)           |
| Mexico            | 2 (1%)   | 2 (2%)        | 0 (0%)           |
| Thailand          | 2 (1%)   | 2 (2%)        | 0 (0%)           |
| Switzerland       | 1 (0%)   | 0 (0%)        | 1 (0%)           |
| Tunisia           | 1 (0%)   | 0 (0%)        | 1 (0%)           |
| Nigeria           | 1 (0%)   | 1 (1%)        | 0 (0%)           |
| Portugal          | 1 (0%)   | 0 (0%)        | 1 (0%)           |
| Qatar             | 1 (0%)   | 0 (0%)        | 1 (0%)           |
| Romania           | 1 (0%)   | 0 (0%)        | 1 (0%)           |
| Sweden            | 1 (0%)   | 0 (0%)        | 1 (0%)           |
| Turkey            | 1 (0%)   | 0 (0%)        | 1 (0%)           |

## Comparative-effectiveness research of COVID-19 treatment: A rapid scoping review

Table A6. Treatment evaluated in knowledge syntheses

| All Evaluated Treatment Options   | Total<br>540 | With protocol<br>154 | Without protocol<br>386 |
|-----------------------------------|--------------|----------------------|-------------------------|
| Steroid                           | 61 (11%)     | 14 (9%)              | 47 (12%)                |
| Hydroxychloroquine                | 60 (11%)     | 16 (10%)             | 44 (11%)                |
| Remdesivir                        | 40 (7%)      | 11 (7%)              | 29 (8%)                 |
| Tocilizumab                       | 36 (7%)      | 10 (6%)              | 26 (7%)                 |
| Convalescent Plasma               | 35 (6%)      | 11 (7%)              | 24 (6%)                 |
| Lopinavir-Ritonair                | 24 (4%)      | 8 (5%)               | 16 (4%)                 |
| Chloroquine                       | 20 (4%)      | 6 (4%)               | 14 (4%)                 |
| Antiviral                         | 14 (3%)      | 4 (3%)               | 10 (3%)                 |
| Anticoagulant                     | 11 (2%)      | 2 (1%)               | 9 (2%)                  |
| Azithromycin                      | 11 (2%)      | 3 (2%)               | 8 (2%)                  |
| Hydroxychloroquine/Azithromycin   | 11 (2%)      | 1 (1%)               | 10 (3%)                 |
| Favipiravir                       | 10 (2%)      | 1 (1%)               | 9 (2%)                  |
| Ivig                              | 10 (2%)      | 2 (1%)               | 8 (2%)                  |
| Colchicine                        | 9 (2%)       | 2 (1%)               | 7 (2%)                  |
| Arbidol                           | 7 (1%)       | 1 (1%)               | 6 (2%)                  |
| Chloroquine/Hcq                   | 7 (1%)       | 1 (1%)               | 6 (2%)                  |
| Invermectin                       | 7 (1%)       | 3 (2%)               | 4 (1%)                  |
| Anticoagulant Therapeutic         | 6 (1%)       | 3 (2%)               | 3 (1%)                  |
| Covid-19 Treatments               | 5 (1%)       | 3 (2%)               | 2 (1%)                  |
| Cell-Based Therapies              | 5 (1%)       | 2 (1%)               | 3 (1%)                  |
| Anakinra                          | 4 (1%)       | 3 (2%)               | 1 (0%)                  |
| Antibiotics                       | 4 (1%)       | 1 (1%)               | 3 (1%)                  |
| Famotidine                        | 4 (1%)       | 1 (1%)               | 3 (1%)                  |
| Hydroxychloroquine/Chloroquine    | 4 (1%)       | 3 (2%)               | 1 (0%)                  |
| Immunomodulator                   | 4 (1%)       | 1 (1%)               | 3 (1%)                  |
| Interleukin- 6 Inhibitors         | 4 (1%)       | 2 (1%)               | 2 (1%)                  |
| Jak-Inhibitors                    | 4 (1%)       | 2 (1%)               | 2 (1%)                  |
| Sarilumab                         | 4 (1%)       | 4 (3%)               | 0 (0%)                  |
| Antimalaria                       | 3 (1%)       | 1 (1%)               | 2 (1%)                  |
| Chloroquine/Hcq/Azithromycin      | 3 (1%)       | 3 (2%)               | 0 (0%)                  |
| Hydroxychloroquine/Azithromycin   | 3 (1%)       | 0 (0%)               | 3 (1%)                  |
| Interferon-Beta                   | 3 (1%)       | 1 (1%)               | 2 (1%)                  |
| Prophylactic Anticoagulant        | 3 (1%)       | 2 (1%)               | 1 (0%)                  |
| Statins                           | 3 (1%)       | 0 (0%)               | 3 (1%)                  |
| Umifenovir                        | 3 (1%)       | 0 (0%)               | 3 (1%)                  |
| Vitamin D                         | 3 (1%)       | 1 (1%)               | 2 (1%)                  |
| Acei                              | 2 (0%)       | 2 (1%)               | 0 (0%)                  |
| Acei/Arb                          | 2 (0%)       | 0 (0%)               | 2 (1%)                  |
| Anticoagulant Prophylactic        | 2 (0%)       | 2 (1%)               | 0 (0%)                  |
| Antiplatelets                     | 2 (0%)       | 1 (1%)               | 1 (0%)                  |
| Antivirals/Antibiotics            | 2 (0%)       | 2 (1%)               | 0 (0%)                  |
| Arb                               | 2 (0%)       | 2 (1%)               | 0 (0%)                  |
| Baloxavir Marboxil                | 2 (0%)       | 0 (0%)               | 2 (1%)                  |
| Bromhexine                        | 2 (0%)       | 1 (1%)               | 1 (0%)                  |
| Chloroquine/Azithromycin          | 2 (0%)       | 0 (0%)               | 2 (1%)                  |
| Corticosteroids/Iv Immunoglobulin | 2 (0%)       | 1 (1%)               | 1 (0%)                  |
| Interferon                        | 2 (0%)       | 0 (0%)               | 2 (1%)                  |



## Comparative-effectiveness research of COVID-19 treatment: A rapid scoping review

1  
2  
3  
4  
5  
6  
7  
8  
9  
10  
11  
12  
13  
14  
15  
16  
17  
18  
19  
20  
21  
22  
23  
24  
25  
26  
27  
28  
29  
30  
31  
32  
33  
34  
35  
36  
37  
38  
39  
40  
41  
42  
43  
44  
45  
46  
47  
48  
49  
50  
51  
52  
53  
54  
55  
56  
57  
58  
59  
60

|                                                                          | <b>Total</b> | <b>With protocol</b> | <b>Without protocol</b> |
|--------------------------------------------------------------------------|--------------|----------------------|-------------------------|
| <b>All Evaluated Treatment Options</b>                                   | <b>540</b>   | <b>154</b>           | <b>386</b>              |
| Interferon-Beta-1a                                                       | 2 (0%)       | 1 (1%)               | 1 (0%)                  |
| Ruxolitinib                                                              | 2 (0%)       | 0 (0%)               | 2 (1%)                  |
| Tocilizumab/Sarilumab                                                    | 2 (0%)       | 0 (0%)               | 2 (1%)                  |
| Acalabrutinib                                                            | 1 (0%)       | 0 (0%)               | 1 (0%)                  |
| Antinflammatory                                                          | 1 (0%)       | 0 (0%)               | 1 (0%)                  |
| Antirheumatic                                                            | 1 (0%)       | 1 (1%)               | 0 (0%)                  |
| Antitumor                                                                | 1 (0%)       | 0 (0%)               | 1 (0%)                  |
| Arbidol/Lopinavir+Ritonavir                                              | 1 (0%)       | 0 (0%)               | 1 (0%)                  |
| Aspirin                                                                  | 1 (0%)       | 0 (0%)               | 1 (0%)                  |
| Azithromycin/Hcq                                                         | 1 (0%)       | 0 (0%)               | 1 (0%)                  |
| Azithromycin/Zinc                                                        | 1 (0%)       | 0 (0%)               | 1 (0%)                  |
| Calcifediol                                                              | 1 (0%)       | 0 (0%)               | 1 (0%)                  |
| Clazakisumab                                                             | 1 (0%)       | 1 (1%)               | 0 (0%)                  |
| Corticosteroid/Antivirals                                                | 1 (0%)       | 0 (0%)               | 1 (0%)                  |
| Corticosteroids/<br>Tocilizumab/Anakinra/Ivig                            | 1 (0%)       | 0 (0%)               | 1 (0%)                  |
| Cytokine Therapy                                                         | 1 (0%)       | 0 (0%)               | 1 (0%)                  |
| Dpp-4 Inhibitor                                                          | 1 (0%)       | 1 (1%)               | 0 (0%)                  |
| Favipiravir/ Baloxavir Marboxil                                          | 1 (0%)       | 0 (0%)               | 1 (0%)                  |
| Favipiravir/Other Antivirals                                             | 1 (0%)       | 0 (0%)               | 1 (0%)                  |
| Galidesivir/Sofosbuvir/Ribavirin                                         | 1 (0%)       | 0 (0%)               | 1 (0%)                  |
| Hydroxychloroquine/Antibiotics                                           | 1 (0%)       | 0 (0%)               | 1 (0%)                  |
| Hydroxychloroquine/Azithromycin/R<br>ibavirin/Interferon/Interferon Alfa | 1 (0%)       | 0 (0%)               | 1 (0%)                  |
| Hydroxychloroquine/Chloroquine/Azi<br>thromycin                          | 1 (0%)       | 0 (0%)               | 1 (0%)                  |
| Hydroxychloroquine/Chloroquine/Azi<br>thromycin/Or Lopinavir/Ritonavir   | 1 (0%)       | 1 (1%)               | 0 (0%)                  |
| Hydroxychloroquine/Lopinavir-<br>Ritonair                                | 1 (0%)       | 0 (0%)               | 1 (0%)                  |
| Hydroxychloroquine/Ribavirin/Interfe<br>ron/Interferon Alfa              | 1 (0%)       | 0 (0%)               | 1 (0%)                  |
| Ibrutinib                                                                | 1 (0%)       | 0 (0%)               | 1 (0%)                  |
| Ifn B-1b/<br>Immunomodulatory/Antivirals                                 | 1 (0%)       | 0 (0%)               | 1 (0%)                  |
| Immune Therapy/Or Antiviral<br>Therapy/Or Both                           | 1 (0%)       | 0 (0%)               | 1 (0%)                  |
| Immunomodulation/Hcq/Cq                                                  | 1 (0%)       | 0 (0%)               | 1 (0%)                  |
| Interferon Alpha-2b                                                      | 1 (0%)       | 0 (0%)               | 1 (0%)                  |
| Interferon-Beta/Rbv                                                      | 1 (0%)       | 0 (0%)               | 1 (0%)                  |
| Jak-Inhibitor/Type 1 Interferon                                          | 1 (0%)       | 0 (0%)               | 1 (0%)                  |
| Levilimab                                                                | 1 (0%)       | 1 (1%)               | 0 (0%)                  |
| Lopinavir                                                                | 1 (0%)       | 1 (1%)               | 0 (0%)                  |
| Lopinavir-Ritonair/Arbidol                                               | 1 (0%)       | 0 (0%)               | 1 (0%)                  |
| Lopinavir-Ritonair/Azithromycin                                          | 1 (0%)       | 0 (0%)               | 1 (0%)                  |
| Lopinavir-Ritonair/Remdesivir                                            | 1 (0%)       | 0 (0%)               | 1 (0%)                  |
| Lopinavir-<br>Ritonair/Ribavirin/Interferon Beta                         | 1 (0%)       | 0 (0%)               | 1 (0%)                  |
| Meplazumab                                                               | 1 (0%)       | 0 (0%)               | 1 (0%)                  |

## Comparative-effectiveness research of COVID-19 treatment: A rapid scoping review

|                                                                | <b>Total</b> | <b>With protocol</b> | <b>Without protocol</b> |
|----------------------------------------------------------------|--------------|----------------------|-------------------------|
| <b>All Evaluated Treatment Options</b>                         | <b>540</b>   | <b>154</b>           | <b>386</b>              |
| Neutralizing Antibody                                          | 1 (0%)       | 0 (0%)               | 1 (0%)                  |
| Nsaids                                                         | 1 (0%)       | 0 (0%)               | 1 (0%)                  |
| Olokizumab                                                     | 1 (0%)       | 1 (1%)               | 0 (0%)                  |
| Oseltamivir/Lopinavir/Ritonavir/Arbidol/Ribavirin/ Sfdc/ Other | 1 (0%)       | 0 (0%)               | 1 (0%)                  |
| Pentoxifylline                                                 | 1 (0%)       | 0 (0%)               | 1 (0%)                  |
| Recombinant Human Gcsf                                         | 1 (0%)       | 0 (0%)               | 1 (0%)                  |
| Renal Replacement Therapy/                                     |              |                      |                         |
| Glucocorticoids                                                | 1 (0%)       | 0 (0%)               | 1 (0%)                  |
| Ribavirin                                                      | 1 (0%)       | 1 (1%)               | 0 (0%)                  |
| Sofosbuvir/Daclatasvir                                         | 1 (0%)       | 0 (0%)               | 1 (0%)                  |
| Sulodexide                                                     | 1 (0%)       | 0 (0%)               | 1 (0%)                  |
| Type I Interferons                                             | 1 (0%)       | 0 (0%)               | 1 (0%)                  |
| Vitamin C                                                      | 1 (0%)       | 0 (0%)               | 1 (0%)                  |
| Ritonavir                                                      | 0 (0%)       | 0 (0%)               | 0 (0%)                  |

Note: NS-immunosuppressant: non-steroidal immunosuppressant. ACEI/ARB: angiotensin-converting enzyme (ACE) inhibitor and an angiotensin receptor blocker (ARB). IVIG: Intravenous immune globulin.

## PRISMA ScR checklist

| SECTION                                  | ITEM | PRISMA-ScR CHECKLIST ITEM                                                                                                                                                                                                                                                                                  | REPORTED ON PAGE # |
|------------------------------------------|------|------------------------------------------------------------------------------------------------------------------------------------------------------------------------------------------------------------------------------------------------------------------------------------------------------------|--------------------|
| <b>TITLE</b>                             |      |                                                                                                                                                                                                                                                                                                            |                    |
| <b>Title</b>                             | 1    | Identify the report as a scoping review.                                                                                                                                                                                                                                                                   | 1                  |
| <b>ABSTRACT</b>                          |      |                                                                                                                                                                                                                                                                                                            |                    |
| <b>Structured summary</b>                | 2    | Provide a structured summary that includes (as applicable): background, objectives, eligibility criteria, sources of evidence, charting methods, results, and conclusions that relate to the review questions and objectives.                                                                              | 3-4                |
| <b>INTRODUCTION</b>                      |      |                                                                                                                                                                                                                                                                                                            |                    |
| <b>Rationale</b>                         | 3    | Describe the rationale for the review in the context of what is already known. Explain why the review questions/objectives lend themselves to a scoping review approach.                                                                                                                                   | 6                  |
| <b>Objectives</b>                        | 4    | Provide an explicit statement of the questions and objectives being addressed with reference to their key elements (e.g., population or participants, concepts, and context) or other relevant key elements used to conceptualize the review questions and/or objectives.                                  | 6                  |
| <b>METHODS</b>                           |      |                                                                                                                                                                                                                                                                                                            |                    |
| <b>Protocol and registration</b>         | 5    | Indicate whether a review protocol exists; state if and where it can be accessed (e.g., a Web address); and if available, provide registration information, including the registration number.                                                                                                             | 6                  |
| <b>Eligibility criteria</b>              | 6    | Specify characteristics of the sources of evidence used as eligibility criteria (e.g., years considered, language, and publication status), and provide a rationale.                                                                                                                                       | 7-8                |
| <b>Information sources*</b>              | 7    | Describe all information sources in the search (e.g., databases with dates of coverage and contact with authors to identify additional sources), as well as the date the most recent search was executed.                                                                                                  | 7                  |
| <b>Search</b>                            | 8    | Present the full electronic search strategy for at least 1 database, including any limits used, such that it could be repeated.                                                                                                                                                                            | 7, Appendix 2      |
| <b>Selection of sources of evidence†</b> | 9    | State the process for selecting sources of evidence (i.e., screening and eligibility) included in the scoping review.                                                                                                                                                                                      | 8                  |
| <b>Data charting process‡</b>            | 10   | Describe the methods of charting data from the included sources of evidence (e.g., calibrated forms or forms that have been tested by the team before their use, and whether data charting was done independently or in duplicate) and any processes for obtaining and confirming data from investigators. | 8-9                |
| <b>Data items</b>                        | 11   | List and define all variables for which data were sought and any assumptions and simplifications made.                                                                                                                                                                                                     | 9                  |

|                                                                         |    |                                                                                                                                                                                                       |                                |
|-------------------------------------------------------------------------|----|-------------------------------------------------------------------------------------------------------------------------------------------------------------------------------------------------------|--------------------------------|
| <b>Critical appraisal of individual sources of evidence<sup>§</sup></b> | 12 | If done, provide a rationale for conducting a critical appraisal of included sources of evidence; describe the methods used and how this information was used in any data synthesis (if appropriate). | N/A                            |
| <b>Synthesis of results</b>                                             | 13 | Describe the methods of handling and summarizing the data that were charted.                                                                                                                          | 9                              |
| <b>RESULTS</b>                                                          |    |                                                                                                                                                                                                       |                                |
| <b>Selection of sources of evidence</b>                                 | 14 | Give numbers of sources of evidence screened, assessed for eligibility, and included in the review, with reasons for exclusions at each stage, ideally using a flow diagram.                          | 9-10, Figure 1, Appendix 2     |
| <b>Characteristics of sources of evidence</b>                           | 15 | For each source of evidence, present characteristics for which data were charted and provide the citations.                                                                                           | 10-11, Table 1                 |
| <b>Critical appraisal within sources of evidence</b>                    | 16 | If done, present data on critical appraisal of included sources of evidence (see item 12).                                                                                                            | N/A                            |
| <b>Results of individual sources of evidence</b>                        | 17 | For each included source of evidence, present the relevant data that were charted that relate to the review questions and objectives.                                                                 | 11-12, Table 2, Appendix 3,4,5 |
| <b>Synthesis of results</b>                                             | 18 | Summarize and/or present the charting results as they relate to the review questions and objectives.                                                                                                  | 11-12, Table 5                 |
| <b>DISCUSSION</b>                                                       |    |                                                                                                                                                                                                       |                                |
| <b>Summary of evidence</b>                                              | 19 | Summarize the main results (including an overview of concepts, themes, and types of evidence available), link to the review questions and objectives, and consider the relevance to key groups.       | 12-15, Table 5                 |
| <b>Limitations</b>                                                      | 20 | Discuss the limitations of the scoping review process.                                                                                                                                                | 15-16                          |
| <b>Conclusions</b>                                                      | 21 | Provide a general interpretation of the results with respect to the review questions and objectives, as well as potential implications and/or next steps.                                             | 16                             |
| <b>FUNDING</b>                                                          |    |                                                                                                                                                                                                       |                                |
| <b>Funding</b>                                                          | 22 | Describe sources of funding for the included sources of evidence, as well as sources of funding for the scoping review. Describe the role of the funders of the scoping review.                       | 17                             |

JBI = Joanna Briggs Institute; PRISMA-ScR = Preferred Reporting Items for Systematic reviews and Meta-Analyses extension for Scoping Reviews.

\* Where sources of evidence (see second footnote) are compiled from, such as bibliographic databases, social media platforms, and Web sites.

† A more inclusive/heterogeneous term used to account for the different types of evidence or data sources (e.g., quantitative and/or qualitative research, expert opinion, and policy documents) that may be eligible in a scoping review as opposed to only studies. This is not to be confused with information sources (see first footnote).

‡ The frameworks by Arksey and O'Malley (6) and Levac and colleagues (7) and the JBI guidance (4, 5) refer to the process of data extraction in a scoping review as data charting.

§ The process of systematically examining research evidence to assess its validity, results, and relevance before using it to inform a decision. This term is used for items 12 and 19 instead of "risk of bias" (which is more applicable to systematic reviews of interventions) to include and acknowledge the various sources of evidence that may be used in a scoping review (e.g., quantitative and/or qualitative research, expert opinion, and policy document).

# BMJ Open

## Comparative-effectiveness research of COVID-19 treatment: A rapid scoping review

|                                 |                                                                                                                                                                                                                                                                                                                                                                                                                                                                                                                                                                                                                                                                                                                                                                                                                                                                                                                                                                                                                                                                                                                                                                                                                                                                                                                                                                                                                                                                                                                                                                                                                                                                                                                                                    |
|---------------------------------|----------------------------------------------------------------------------------------------------------------------------------------------------------------------------------------------------------------------------------------------------------------------------------------------------------------------------------------------------------------------------------------------------------------------------------------------------------------------------------------------------------------------------------------------------------------------------------------------------------------------------------------------------------------------------------------------------------------------------------------------------------------------------------------------------------------------------------------------------------------------------------------------------------------------------------------------------------------------------------------------------------------------------------------------------------------------------------------------------------------------------------------------------------------------------------------------------------------------------------------------------------------------------------------------------------------------------------------------------------------------------------------------------------------------------------------------------------------------------------------------------------------------------------------------------------------------------------------------------------------------------------------------------------------------------------------------------------------------------------------------------|
| Journal:                        | <i>BMJ Open</i>                                                                                                                                                                                                                                                                                                                                                                                                                                                                                                                                                                                                                                                                                                                                                                                                                                                                                                                                                                                                                                                                                                                                                                                                                                                                                                                                                                                                                                                                                                                                                                                                                                                                                                                                    |
| Manuscript ID                   | bmjopen-2020-045115.R2                                                                                                                                                                                                                                                                                                                                                                                                                                                                                                                                                                                                                                                                                                                                                                                                                                                                                                                                                                                                                                                                                                                                                                                                                                                                                                                                                                                                                                                                                                                                                                                                                                                                                                                             |
| Article Type:                   | Original research                                                                                                                                                                                                                                                                                                                                                                                                                                                                                                                                                                                                                                                                                                                                                                                                                                                                                                                                                                                                                                                                                                                                                                                                                                                                                                                                                                                                                                                                                                                                                                                                                                                                                                                                  |
| Date Submitted by the Author:   | 06-May-2022                                                                                                                                                                                                                                                                                                                                                                                                                                                                                                                                                                                                                                                                                                                                                                                                                                                                                                                                                                                                                                                                                                                                                                                                                                                                                                                                                                                                                                                                                                                                                                                                                                                                                                                                        |
| Complete List of Authors:       | Pham, Ba; St Michael's Hospital Li Ka Shing Knowledge Institute<br>Rios, Patricia; St Michael's Hospital Li Ka Shing Knowledge Institute<br>Radhakrishnan, Amruta; St Michael's Hospital Li Ka Shing Knowledge Institute<br>Darvesh, Nazia; St Michael's Hospital Li Ka Shing Knowledge Institute<br>Antony, Jesmin; St Michael's Hospital Li Ka Shing Knowledge Institute<br>Williams, Chantal; St Michael's Hospital Li Ka Shing Knowledge Institute<br>Ramkissoon, Naveeta; St Michael's Hospital Li Ka Shing Knowledge Institute<br>Cormack, Gordon; University of Waterloo, David R. Cheriton School of Computer Science<br>Grossman, Maura; University of Waterloo, David R. Cheriton School of Computer Science<br>Kampman, Melissa; Health Canada, Epidemiology and Evidence Evaluation for Safety and Effectiveness Section<br>Patel, Milan; Public Health Agency of Canada<br>Yazdi, Fatemeh; St Michael's Hospital Li Ka Shing Knowledge Institute<br>Robson, Reid; St Michael's Hospital Li Ka Shing Knowledge Institute<br>Ghassemi, Marco ; St Michael's Hospital Li Ka Shing Knowledge Institute<br>Macdonald, Erin; St Michael's Hospital Li Ka Shing Knowledge Institute<br>Warren, Rachel; St Michael's Hospital Li Ka Shing Knowledge Institute<br>Muller, Matthew; St Michael's Hospital Li Ka Shing Knowledge Institute; University of Toronto, Department of Medicine<br>Straus, Sharon; St Michael's Hospital Li Ka Shing Knowledge Institute; University of Toronto, Department of Geriatric Medicine<br>Tricco, Andrea; St Michael's Hospital Li Ka Shing Knowledge Institute; University of Toronto Dalla Lana School of Public Health, Epidemiology Division and Institute of Health Policy, Management, and Evaluation |
| <b>Primary Subject Heading</b>: | Respiratory medicine                                                                                                                                                                                                                                                                                                                                                                                                                                                                                                                                                                                                                                                                                                                                                                                                                                                                                                                                                                                                                                                                                                                                                                                                                                                                                                                                                                                                                                                                                                                                                                                                                                                                                                                               |
| Secondary Subject Heading:      | Pharmacology and therapeutics                                                                                                                                                                                                                                                                                                                                                                                                                                                                                                                                                                                                                                                                                                                                                                                                                                                                                                                                                                                                                                                                                                                                                                                                                                                                                                                                                                                                                                                                                                                                                                                                                                                                                                                      |
| Keywords:                       | COVID-19, RESPIRATORY MEDICINE (see Thoracic Medicine), Clinical trials < THERAPEUTICS                                                                                                                                                                                                                                                                                                                                                                                                                                                                                                                                                                                                                                                                                                                                                                                                                                                                                                                                                                                                                                                                                                                                                                                                                                                                                                                                                                                                                                                                                                                                                                                                                                                             |
|                                 |                                                                                                                                                                                                                                                                                                                                                                                                                                                                                                                                                                                                                                                                                                                                                                                                                                                                                                                                                                                                                                                                                                                                                                                                                                                                                                                                                                                                                                                                                                                                                                                                                                                                                                                                                    |

1  
2  
3  
4  
5  
6  
7  
8  
9  
10  
11  
12  
13  
14  
15  
16  
17  
18  
19  
20  
21  
22  
23  
24  
25  
26  
27  
28  
29  
30  
31  
32  
33  
34  
35  
36  
37  
38  
39  
40  
41  
42  
43  
44  
45  
46  
47  
48  
49  
50  
51  
52  
53  
54  
55  
56  
57  
58  
59  
60





I, the Submitting Author has the right to grant and does grant on behalf of all authors of the Work (as defined in the below author licence), an exclusive licence and/or a non-exclusive licence for contributions from authors who are: i) UK Crown employees; ii) where BMJ has agreed a CC-BY licence shall apply, and/or iii) in accordance with the terms applicable for US Federal Government officers or employees acting as part of their official duties; on a worldwide, perpetual, irrevocable, royalty-free basis to BMJ Publishing Group Ltd ("BMJ") its licensees and where the relevant Journal is co-owned by BMJ to the co-owners of the Journal, to publish the Work in this journal and any other BMJ products and to exploit all rights, as set out in our [licence](#).

The Submitting Author accepts and understands that any supply made under these terms is made by BMJ to the Submitting Author unless you are acting as an employee on behalf of your employer or a postgraduate student of an affiliated institution which is paying any applicable article publishing charge ("APC") for Open Access articles. Where the Submitting Author wishes to make the Work available on an Open Access basis (and intends to pay the relevant APC), the terms of reuse of such Open Access shall be governed by a Creative Commons licence – details of these licences and which [Creative Commons](#) licence will apply to this Work are set out in our licence referred to above.

Other than as permitted in any relevant BMJ Author's Self Archiving Policies, I confirm this Work has not been accepted for publication elsewhere, is not being considered for publication elsewhere and does not duplicate material already published. I confirm all authors consent to publication of this Work and authorise the granting of this licence.

1  
2  
3  
4 **1 Comparative-effectiveness research of COVID-19 treatment: A rapid scoping review**

5  
6 2 Ba' Pham<sup>1</sup> Email: [ba.pham@theta.utoronto.ca](mailto:ba.pham@theta.utoronto.ca)

7  
8 3 Patricia Rios<sup>1</sup> Email: [patricia.rios@unityhealth.to](mailto:patricia.rios@unityhealth.to)

9  
10 4 Amruta Radhakrishnan<sup>1</sup> Email: [amruta.radhakrishnan@unityhealth.to](mailto:amruta.radhakrishnan@unityhealth.to)

11  
12 5 Nazia Darvesh<sup>1</sup> Email: [nazia.darvesh@unityhealth.to](mailto:nazia.darvesh@unityhealth.to)

13  
14 6 Jesmin Antony<sup>1</sup> Email: [jesminantony@gmail.com](mailto:jesminantony@gmail.com)

15  
16 7 Chantal Williams<sup>1</sup> Email: [chantal.williams@uhn.to](mailto:chantal.williams@uhn.to)

17  
18 8 Naveeta Ramkissoon<sup>1</sup> Email: [naveeta.ramkissoon@unityhealth.to](mailto:naveeta.ramkissoon@unityhealth.to)

19  
20 9 Gordon V. Cormack<sup>2</sup> Email: [gvcormac@uwaterloo.ca](mailto:gvcormac@uwaterloo.ca)

21  
22 10 Maura R. Grossman<sup>2</sup> Email: [maura.grossman@uwaterloo.ca](mailto:maura.grossman@uwaterloo.ca)

23  
24 11 Melissa Kampman<sup>3</sup> Email: [melissa.kampman@hc-sc.gc.ca](mailto:melissa.kampman@hc-sc.gc.ca)

25  
26 12 Milan Patel<sup>4</sup> Email: [milan.patel@canada.ca](mailto:milan.patel@canada.ca)

27  
28 13 Fatemeh Yazdi<sup>1</sup> Email: [yazdi@live.ca](mailto:yazdi@live.ca)

29  
30 14 Reid Robson<sup>1</sup> Email: [reidcrobson@gmail.com](mailto:reidcrobson@gmail.com)

31  
32 15 Marco Ghassemi<sup>1</sup> Email: [marco.m.ghassemi@gmail.com](mailto:marco.m.ghassemi@gmail.com)

33  
34 16 Erin Macdonald<sup>1</sup> Email: [emacd02@gmail.com](mailto:emacd02@gmail.com)

35  
36 17 Rachel Warren<sup>1</sup> Email: [Rachel.Warren@unityhealth.to](mailto:Rachel.Warren@unityhealth.to)

37  
38 18 Matthew P. Muller<sup>1,5</sup> Email: [matthew.muller@unityhealth.to](mailto:matthew.muller@unityhealth.to)

39  
40 19 Sharon E. Straus<sup>1,6</sup> Email: [sharon.straus@unityhealth.to](mailto:sharon.straus@unityhealth.to)

41  
42 20 Andrea C. Tricco<sup>1,7,8\*</sup> Email: [andrea.tricco@unityhealth.to](mailto:andrea.tricco@unityhealth.to)

43  
44 21 <sup>1</sup>Li Ka Shing Knowledge Institute, St. Michael's Hospital, Unity Health Toronto, Toronto,  
45  
46  
47  
48  
49  
50  
51  
52  
53 22 Ontario, Canada



1  
2  
3 23 <sup>2</sup> David R. Cheriton School of Computer Science, University of Waterloo, Waterloo, Ontario,  
4

5  
6 24 Canada

7  
8 25 <sup>3</sup> Epidemiology and Evidence Evaluation for Safety and Effectiveness Section, Health Canada  
9

10  
11 26 <sup>4</sup> Public Health Agency of Canada

12  
13 27 <sup>5</sup> Department of Medicine, University of Toronto, Toronto, Ontario, Canada

14  
15 28 <sup>6</sup> Department of Geriatric Medicine, University of Toronto, Toronto, Ontario, Canada

16  
17 29 <sup>7</sup> Epidemiology Division and Institute of Health Policy, Management, and Evaluation, Dalla  
18

19  
20 30 Lana School of Public Health, University of Toronto, Toronto, Ontario, Canada

21  
22 31 <sup>8</sup> Queen's Collaboration for Health Care Quality: A JBI Centre of Excellence

23  
24 32 \*Corresponding Author

25  
26 33 Andrea C. Tricco

27  
28 34 Knowledge Translation Program

29  
30 35 Li Ka Shing Knowledge Institute

31  
32 36 209 Victoria Street, 7<sup>th</sup> Floor, East Building, Toronto, ON, M5B 1T8

33  
34 37 St. Michael's Hospital, Unity Health Toronto

35  
36 38 Toronto, Canada

37  
38 39 Email: Andrea.Tricco@unityhealth.to

39  
40 40 Phone: 416-864-6060 ext. 77521

41  
42 41 Word count: 2,943  
43  
44  
45  
46  
47  
48  
49  
50  
51  
52  
53  
54  
55  
56  
57  
58  
59  
60

1  
2  
3  
4 42 **ABSTRACT**

5  
6 43 **Objectives:** The COVID-19 pandemic has stimulated growing research on treatment options.  
7  
8  
9 44 We aim to provide an overview of the characteristics of studies evaluating COVID-19  
10  
11 45 treatment.

12  
13 46 **Design:** Rapid scoping review

14  
15 47 **Data sources:** Medline, Embase and biorxiv/medrxiv from inception to May 15, 2021

16  
17 48 **Setting:** Hospital and community care

18  
19 49 **Participants:** COVID-19 patients of all ages

20  
21 50 **Interventions:** COVID-19 treatment

22  
23 51 **Results:** The literature search identified 616 relevant primary studies of which 188 were  
24  
25 52 randomized controlled trials and 299 relevant evidence syntheses. The studies and evidence  
26  
27 53 syntheses were conducted in 51 and 39 countries, respectively.

28  
29 54 Most studies enrolled patients admitted to acute care hospitals (84%), included on average  
30  
31 55 169 participants, with an average age of 60 years, study duration of 28 days, number of effect  
32  
33 56 outcomes of four and number of harm outcomes of one. The most common primary outcome  
34  
35 57 was death (32%).

36  
37 58 The included studies evaluated 214 treatment options. The most common treatments were  
38  
39 59 tocilizumab (11%), hydroxychloroquine (9%), and convalescent plasma (7%). The most  
40  
41 60 common therapeutic categories were non-steroidal immunosuppressants (18%), steroids  
42  
43 61 (15%), and antivirals (14%). The most common therapeutic categories involving multiple  
44  
45 62 drugs were antimalarials/antibiotics (16%), steroids/non-steroidal immunosuppressants (9%),  
46  
47 63 and antimalarials/antivirals/antivirals (7%). The most common treatments evaluated in  
48  
49 64 systematic reviews were hydroxychloroquine (11%), remdesivir (8%), tocilizumab (7%) and  
50  
51 65 steroids (7%).  
52  
53  
54  
55  
56  
57  
58  
59  
60

1  
2  
3 66 The evaluated treatment was in favour 50% and 36% of the evaluations, according to the  
4  
5  
6 67 conclusion of the authors of primary studies and evidence syntheses, respectively.  
7

8 68 **Conclusions:** This scoping review characterized a growing body of comparative-  
9  
10 69 effectiveness primary studies and evidence syntheses. The results suggest future studies  
11  
12 70 should focus on children, elderly  $\geq 65$  years of age, patients with mild symptoms, outpatient  
13  
14 71 treatment, multi-mechanism therapies, harms and active comparators. The results also  
15  
16 72 suggest that future living evidence synthesis and network meta-analysis would provide  
17  
18 73 additional information for decision-makers on managing COVID-19.  
19

20  
21 74 Keywords: COVID-19; RESPIRATORY MEDICINE; Clinical trials<THERAPEUTICS,  
22  
23  
24 75 scoping review, knowledge synthesis, evidence synthesis  
25  
26  
27  
28  
29  
30  
31  
32  
33  
34  
35  
36  
37  
38  
39  
40  
41  
42  
43  
44  
45  
46  
47  
48  
49  
50  
51  
52  
53  
54  
55  
56  
57  
58  
59  
60

1  
2  
3 76 **Strengths and limitations of this study**  
4

- 5 77 • Broad literature search and study selection yielded 915 study reports, including 616  
6  
7 relevant studies (188 randomized controlled trials) and 299 evidence syntheses.  
8 78  
9  
10 79 • Detailed charting of study populations, interventions and outcomes of included  
11  
12 studies and reviews were conducted to analyze characteristics and trends in the  
13 80  
14 included literature and to elucidate lessons for future research.  
15 81  
16  
17 82 • Practical implications for future research with respect to study design, populations,  
18  
19 interventions, comparators, outcomes and methodological approaches were identified.  
20 83  
21  
22 84 • Semi-automation approach to study selection, allowing for a very broad literature  
23  
24 search and screening approximately 290,000 titles/abstracts in about 40 person-hours  
25 85  
26 over 2.3 weeks.  
27 86  
28  
29 87 • This is a scoping review and as such, we did not assess the risk of bias of the included  
30  
31 studies and evidence syntheses.  
32 88  
33  
34  
35  
36  
37  
38  
39  
40  
41  
42  
43  
44  
45  
46  
47  
48  
49  
50  
51  
52  
53  
54  
55  
56  
57  
58  
59  
60

## 89 INTRODUCTION

90 The current global pandemic of Coronavirus Disease 2019 (COVID-19) has resulted in a high  
91 burden of disease and mortality worldwide(1, 2). The lack of effective treatments for  
92 COVID-19 has resulted in the almost constant production of studies and evidence syntheses  
93 evaluating potential treatment options, as illustrated by thousands of study protocols in  
94 clinical trial registries and hundreds of review protocols in systematic review registries(3, 4).  
95 Attempts to synthesize this evidence thus far have resulted in various scoping reviews  
96 focusing on single drugs or isolated drug classes(5-9). Better understanding of the  
97 characteristics of study populations, treatments and outcomes of this research is a prerequisite  
98 to the design and conduct of future comparative-effectiveness research.

99 The objective of this rapid scoping review was to provide an overview of the characteristics  
100 of studies examining COVID-19 treatment.

## 101 METHODS

102 The conduct of the rapid scoping review was guided by the JBI (formally Joanna Briggs  
103 Institute) Guide for scoping reviews, alongside the World Health Organization (WHO) Guide  
104 to rapid reviews(10, 11). Compared to a scoping review, we used streamlined methods in this  
105 rapid scoping review (e.g., single reviewers conducted study selection). An integrated  
106 knowledge translation approach was used to engage with the knowledge users from Health  
107 Canada (MK) and Public Health Agency of Canada (MP) throughout the conduct of the rapid  
108 scoping review, including during: research question development, literature search, study  
109 inclusion, interpretation of results, and draft report. The protocol for the review was  
110 registered using the Open Science Framework (<https://osf.io/ypz7x>). The discussion section  
111 includes minor amendments that occurred to the conduct of the review from the original  
112 protocol. Reporting of results was guided using the Preferred Reporting Items for Systematic  
113 Reviews and Meta-Analyses extension to Scoping Reviews (PRISMA-ScR) Statement(12).

1  
2  
3 114 Our research question was “What evidence exists on the treatments for COVID-19 in primary  
4  
5 115 studies and reviews”, which is appropriate for the scoping review methodology(13).  
6  
7  
8

### 9 116 **Patient and Public Involvement**

10  
11 117 Since this work was carried out as part of a rapid response to the COVID-19 pandemic  
12  
13 118 project, timelines did not allow for participation of any patients or members of the public in  
14  
15 119 this scoping review.  
16  
17

### 18 19 120 **Literature search**

20  
21 121 Comprehensive literature searches and citation screening were used in combination to gather  
22  
23 122 relevant evidence from MEDLINE, EMBASE and pre-print servers (biorxiv/medrxiv)(14).  
24  
25

26 123 The literature was initially searched from inception to May 21, 2020 and subsequently  
27  
28 124 updated to May 15, 2021. Titles/abstracts were identified for screening using the Continuous  
29  
30 125 Active Learning<sup>®</sup> (CAL<sup>®</sup>) tool, which uses supervised machine learning (see Appendix 1 for  
31  
32 126 the description and performance of the tool)(14). For archives that could be retrieved in their  
33  
34 127 entirety (e.g., MEDLINE, pre-print servers), the CAL<sup>®</sup> tool applied broad relevant search  
35  
36 128 terms (Appendix 1). This search was supplemented by a literature search conducted by an  
37  
38 129 experienced librarian in EMBASE (Appendix 2). The literature search was not restrict by  
39  
40 130 language or publication status.  
41  
42  
43  
44

### 45 131 **Eligibility criteria**

46  
47 132 The eligibility criteria followed the PICOS framework and consisted of:

- 48  
49  
50 133 • Population: Individuals of any age who were clinically and/or laboratory diagnosed with  
51  
52 134 COVID-19.  
53  
54 135 • Intervention: Any compounds under investigation in human clinical trials as potential  
55  
56 136 COVID-19 therapies (Appendix 3). Chinese medicine and complementary and alternative  
57  
58 137 medicine – either alone or in combination with these medications – were excluded.  
59  
60

- 1  
2  
3 138 • Comparator: Any of the interventions listed above, no intervention or placebo.  
4  
5  
6 139 • Outcomes: Any reported outcome.  
7  
8 140 • Study designs: Primary studies of any design with a comparator group. Evidence  
9  
10 141 syntheses of such studies were included, including systematic reviews, scoping reviews,  
11  
12 142 rapid reviews, meta-analysis and overviews of reviews.  
13  
14  
15

### 16 143 **Study selection**

17  
18 144 A streamlined approach to study selection was used for the rapid scoping review. In  
19  
20 145 combination with manual screening by reviewers, the CAL<sup>®</sup> tool was used to identify and  
21  
22 146 rank the titles and abstracts most likely to meet the inclusion criteria. This process continued  
23  
24 147 iteratively until none of the identified articles met the inclusion criteria. For manual  
25  
26 148 screening, a screening form based on the eligibility criteria was prepared for reviewers to aid  
27  
28 149 in making consistent judgements on article relevance. A pilot-test was conducted using a  
29  
30 150 random sample of 10 titles/abstracts until reviewers reached at least 75% agreement.  
31  
32 151 Subsequently, screening was completed by single reviewers.  
33  
34  
35  
36

### 37 152 **Data charting and coding**

38  
39 153 A charting form was developed and calibrated amongst the entire review team using two  
40  
41 154 randomly selected full-text articles to ensure a standard approach to data collection.  
42  
43 155 Following successful completion of the pilot-test, included studies were charted by single  
44  
45 156 reviewers and verified by a second reviewer to ensure accuracy. Methodological quality or  
46  
47 157 risk of bias appraisal of included studies was not conducted since this is scoping review(10).  
48  
49 158 The items collected included study characteristics (e.g., study duration, study design, country  
50  
51 159 of conduct), patient characteristics (e.g., type of diagnosis, mean age), intervention and  
52  
53 160 comparator details (e.g., type of intervention, dose, frequency, duration) and outcome  
54  
55 161 measures details (e.g., mortality, viral clearance, and hospital admission).  
56  
57  
58  
59  
60

1  
2  
3 162 Pharmacological agents were grouped by their therapeutic category(15). Study primary  
4  
5 163 outcomes were grouped together to reflect the clinical, virology, respiratory, inflammatory,  
6  
7 164 cardiology and olfactory status and measures of COVID-19(16, 17). The numbers of effect  
8  
9 165 and harm measures were derived by counting the outcomes from the description of study  
10  
11 166 outcomes. Authors' conclusions were coded into the following categories: favor treatment,  
12  
13 167 favor control, indeterminate and other(18). Pairs of reviewers conducted the data coding  
14  
15 168 independently, with discrepancies reviewed and resolved through discussion by a pair of  
16  
17 169 reviewers.  
18  
19  
20  
21  
22

## 23 170 **Synthesis**

24  
25 171 The charted and coded data were summarized descriptively for all patient population,  
26  
27 172 interventions, comparators, outcomes, and conclusion statements. The data were stratified by  
28  
29 173 study design (randomized controlled trials versus non-RCT) and review type (review  
30  
31 174 conducted according to a review protocol or otherwise).  
32  
33  
34

## 35 175 **Data repository**

36  
37 176 All material related to this review, including EndNote databases, extracted data in MS Excel,  
38  
39 177 coding categories and analysis procedures written in the statistical software R are available at  
40  
41 178 [https://knowledgetranslation.net/comparative-effectiveness-research-of-covid-19-treatment-a-](https://knowledgetranslation.net/comparative-effectiveness-research-of-covid-19-treatment-a-rapid-scoping-review-data-repository/)  
42  
43 179 [rapid-scoping-review-data-repository/](https://knowledgetranslation.net/comparative-effectiveness-research-of-covid-19-treatment-a-rapid-scoping-review-data-repository/).  
44  
45  
46

## 47 180 **RESULTS**

### 51 181 **Literature Search**

52  
53 182 Figure 1 displays the literature search results. The semi-automation process with CAL<sup>®</sup> and  
54  
55 183 human reviewers allowed for the screening of approximately 286,000 titles/abstracts in about  
56  
57 184 40 person-hours over 2.3 weeks. Specifically, CAL<sup>®</sup> identified 289,844 Covid-19 records and  
58  
59 185 4,183 potentially relevant titles/abstracts. Title/abstract screening by reviewers resulted in  
60



1  
2  
3 186 1,542 potentially relevant reports. Report screening by reviewers resulted in 915 relevant  
4  
5 187 reports, including 616 studies and 299 knowledge syntheses. The list of included primary  
6  
7 188 studies and knowledge syntheses is in Appendix 4 and 5, respectively.  
8  
9

### 10 11 189 **Characteristics of included studies**

12  
13 190 Figure 2 displays the timing when the studies were available online; on average 48 primary  
14  
15 191 studies per month were published from July 2020 to April 2021. Table 1 displays the  
16  
17 192 characteristics of the 616 included studies of varying design, including randomized controlled  
18  
19 193 trials (188 studies [31%]), retrospective cohort studies (304 [49%]) and prospective cohort  
20  
21 194 studies (70 [11%]), amongst others. The median study duration was 28 days and the median  
22  
23 195 sample size was 169 participants. Public sources provided funding for about a third of the  
24  
25 196 studies; RCTs were funded often by private funding sources (27% relative to 3% for non-  
26  
27 197 RCT). The primary studies were conducted in 51 countries, including the United States  
28  
29 198 (26%), China (17%), Italy (8%), Spain (7%), France (6%), India (4%), Iran (3%), United  
30  
31 199 Kingdom (3%) and Brazil (3%), among others (Table A1, Appendix 6).  
32  
33

34  
35 200 Most studies were conducted with participants admitted to acute care hospital (84%).  
36  
37 201 Participants were on average 60 years of age, including 61% male, and mostly with  
38  
39 202 confirmed COVID-19 via PCR test (Table 1). About a third of the included studies enrolled  
40  
41 203 participants with severe or critical COVID-19 conditions. Few studies (0.3%) enrolled  
42  
43 204 children (e.g., <16 years of age) or the elderly (e.g., ≥65 years of age, 2%). Figure A1  
44  
45 205 displays the cloud of words often used to describe the participants (Appendix 6). Typical  
46  
47 206 words used were COVID-19, COVID-19 patients, hospitalized, severe, pneumonia, ICU,  
48  
49 207 outpatient, respiratory distress, invasive mechanical ventilation, critically ill and  
50  
51 208 supplemental oxygen, among others.  
52  
53

54  
55 209 The median number of effect outcomes was four, and the corresponding number of harm  
56  
57 210 outcomes was one (Table 1). Common primary outcomes included death/survival (32% of the  
58  
59  
60

1  
2  
3 211 included studies), clinical status/measures (19%), virology status/measures (10%), respiratory  
4  
5 212 status/measures (9%), safety/adverse events excluding death (7%) and composite outcomes  
6  
7 213 involving death (6%, e.g., intubation and death, or intensive care admission and death),  
8  
9 214 among others.

10  
11  
12 215 The included studies evaluated 827 treatment arms (711 single-drug and 116 multiple-drug  
13  
14 216 treatment arms) against 616 control arms, of which 106 (17%) control arms involved active  
15  
16 217 comparators (Table 2). The treatment arms consisted of 215 unique treatment options (Table  
17  
18 218 A2, Appendix 6). The most common treatments were tocilizumab (11%),  
19  
20 219 hydroxychloroquine (9%), convalescent plasma (7%), steroid (4%), lopinavir combined with  
21  
22 220 ritonavir (4%), methylprednisolone (3%), remdesivir (3%), enoxaparin (2%),  
23  
24 221 hydroxychloroquine combine with azithromycin (2%), and anakinra (2%), among others.

25  
26 222 Table 2 also displays the common therapeutic categories of the evaluated treatment. The most  
27  
28 223 common therapeutic categories were non-steroidal immunosuppressant (18%), steroid (15%),  
29  
30 224 antiviral (14%), antimalarial (12%), anticoagulant (5%), convalescent plasma (8%), antibiotic  
31  
32 225 (4%), anti-inflammatory (3%), interferon therapy (2%), anti-parasitic (2%) and  
33  
34 226 immunomodulatory (2%), among others (details in Table A3, Appendix 6). Common  
35  
36 227 therapeutic categories involving multiple drugs were the combination of  
37  
38 228 antimalarial/antibiotic (16%), steroid/non-steroidal immunosuppressant (9%),  
39  
40 229 antimalarial/antiviral/antiviral (7%), 2-antivirals (4%) and antiviral/interferon (4%), among  
41  
42 230 others (Table A4, Appendix 6).

### 231 **Characteristics of included knowledge syntheses**

232 Figure 2 displays the timing when the knowledge syntheses were available online, on average  
233 22 reviews appeared each month from May 2020 to April 2021. Table 3 displays  
234 characteristics of the 299 included knowledge syntheses, including 88 (29%) knowledge  
235 syntheses and 211 (71%) knowledge syntheses conducted with and without a review

1  
2  
3 236 protocol, respectively. Commonly conducted knowledge syntheses included systematic  
4  
5 237 review with meta-analysis (63%), systematic review (24%), meta-analysis (4%, none  
6  
7 238 mentioned the use of a review protocol), scoping review (3%) and rapid review (3%), among  
8  
9  
10 239 others. Most reviews (83%) included RCT and non-RCT studies. The median number of data  
11  
12 240 sources was five and the median number of included studies was 14. The evidence syntheses  
13  
14 241 were conducted in 39 countries, including the United States (19%), China (14%), India  
15  
16 242 (11%), Iran (6%) and the United Kingdom (6%), among others (Table A5, Appendix 6).  
17  
18 243 The evidence syntheses evaluated 518 treatment arms against 299 control arms (Table 4). The  
19  
20 244 treatment arms consisted of 115 unique treatment options (Table A6, Appendix 6). The most  
21  
22 245 common treatment options were hydroxychloroquine (11%), remdesivir (8%), tocilizumab  
23  
24 246 (7%), steroids (7%), convalescent plasma (6%), and lopinavir/ritonavir (5%), among others  
25  
26 247 (Table 4 and Table A6, Appendix 6).  
27  
28  
29  
30  
31

### 32 248 **Treatment evaluation according to authors' conclusion**

33  
34 249 Table 5 displays the results of the treatment evaluation according to authors' conclusion.  
35  
36 250 Among the included studies and knowledge syntheses, the conclusion was in favour of  
37  
38 251 treatment in 50% and 36% of the evaluated treatment arms, respectively.  
39  
40  
41

## 42 252 **DISCUSSION**

43  
44 253 We completed a rapid scoping review for Health Canada and Public Health Agency of  
45  
46 254 Canada to identify pharmacologic treatments for COVID-19. A comprehensive search of  
47  
48 255 electronic databases, trial registries and other grey literature sources from inception to May  
49  
50 256 2020 identified 9 controlled trials and 19 cohort studies with approximately 8,000  
51  
52 257 participants. Updated to May 15, 2021, the search of electronic databases identified 933  
53  
54 258 relevant reports, including 630 studies with approximately 15.4 million participants, and 303  
55  
56 259 knowledge syntheses.  
57  
58  
59  
60

1  
2  
3 260 With respect to study population, existing studies put much emphasis on adult patients  
4  
5 261 admitted to acute care hospitals. Future studies need to focus on children, older adults aged  
6  
7 262  $\geq 65$  years and patients with mild symptoms in community settings. Future study populations  
8  
9  
10 263 will need to reflect a broader range of age groups as the current pandemic evolves to affect  
11  
12 264 younger age groups(19, 20).

13  
14 265 With respect to treatment, many studies and reviews evaluated antimalarial agents. Existing  
15  
16 266 studies emphasised preventing and treating cytokine surge with steroids and non-steroidal  
17  
18 267 immunosuppressants, including interleukin-6 inhibitors (e.g., tocilizumab, sarilumab),  
19  
20 268 interleukin-1 antagonist (e.g., anakinra), anti-IL-1 $\beta$  monoclonal antibody (e.g., canakinumab),  
21  
22 269 TNF-alpha inhibitor (e.g., adalimumab) and Janus kinase inhibitors (e.g., baricitinib,  
23  
24 270 ruxolitinib). Future studies may need to explore treatment for patients not responding to these  
25  
26 271 agents, such as immunomodulators (e.g., thymosin- $\alpha 1$ ). Existing studies put much emphasis  
27  
28 272 on monotherapy; future studies need to evaluate combination therapy that addresses the  
29  
30 273 multiple aspects of COVID-19, such as virology, respiratory, inflammatory and cardiology.  
31  
32 274 Future studies may also need to explore outpatient treatment for patients with mild  
33  
34 275 symptoms, and treatment options not frequently evaluated in existing studies, such as  
35  
36 276 therapeutic anticoagulants.

37  
38 277 With respect to comparators, most existing randomized controlled trials used placebo  
39  
40 278 comparators while most observational studies used standard of care as comparator; future  
41  
42 279 studies may consider active treatment as comparators, especially when evaluating treatments  
43  
44 280 aiming to produce incremental improvement against effective treatments. Methodological  
45  
46 281 issues related to the selection and delineation of comparators in studies evaluating  
47  
48 282 combination therapies deserve attention. For example, a study evaluated multi-mechanism  
49  
50 283 approach with medications targeting early immunomodulation, anticoagulation, and viral  
51  
52 284 suppression to prevent catastrophic cytokine release syndrome encountered large variation in  
53  
54  
55  
56  
57  
58  
59  
60

1  
2  
3 285 clinical characteristics of study participants and standard-of-care comparators in the five  
4  
5 286 participant hospitals in two countries, including differences in disease severity and different  
6  
7 287 doses of colchicine and types of steroids used across comparative groups(17).  
8  
9  
10 288 With respect to outcomes, about a third of the included studies used mortality as the primary  
11  
12 289 outcome. Tracking this outcome may require sufficiently long study duration, perhaps longer  
13  
14 290 than the median duration of less than a month observed among existing studies, especially in  
15  
16 291 patients with prolonged respiratory problems, suggesting longer follow-up duration for future  
17  
18 292 studies. Of note, few existing studies used composite endpoints involving death, including  
19  
20 293 endpoints such as intubation and intensive care admission. This use seems to be particularly  
21  
22 294 suitable to capture the respiratory, immunology and cardiovascular aspects of COVID-19, as  
23  
24 295 well as mortality. Few existing studies focused on harms due to treatment and among those  
25  
26 296 that evaluated benefits and harms, the median number of reported harms was one; future  
27  
28 297 studies need to put more emphasis on harm evaluation. Existing RCTs put much emphasis on  
29  
30 298 the use of clinical status/measures as primary outcome measures. Future trials may consider  
31  
32 299 other primary outcomes that are relevant to patients, such as pneumonia, acute respiratory  
33  
34 300 distress syndrome, multi-organ failure, and septic shock, among others.  
35  
36  
37  
38  
39 301 With respect to study design, our results showed a breakdown of 30% and 70% for RCTs and  
40  
41 302 observational studies, respectively. Future trials are needed for evaluating combination  
42  
43 303 therapies. Observational studies will remain pertinent in the evaluation of combination  
44  
45 304 therapies, especially when rich data becomes available with their use in practice. Our review  
46  
47 305 excluded qualitative studies, but we wish to emphasize the importance of these studies in  
48  
49 306 elucidating the experience of COVID-19 patients.  
50  
51  
52  
53 307 With respect to evidence synthesis, we identified a small number of meta-analyses conducted  
54  
55 308 without the associated systematic review and review protocol (n=13). This practice needs to  
56  
57 309 be scrutinized because of the associated high risk of bias in the results, which could be  
58  
59  
60

1  
2  
3 310 wrong, but appeared to be convincingly precise(21). Existing knowledge syntheses mostly  
4  
5 311 evaluated monotherapy; future evidence syntheses will need to include data from the  
6  
7 312 evaluation of combination therapy. The number of existing network meta-analyses was low  
8  
9  
10 313 (n=4); future network meta-analyses are needed to identify effective treatment given a  
11  
12 314 plethora of treatment options, as well as to identify effective component treatment options  
13  
14 315 addressing multiple aspects of COVID-19(22). Given the growing literature, there is a  
15  
16 316 definitive need for living knowledge synthesis, in which the synthesis is updated regularly as  
17  
18 317 new studies become available(23). The results suggest that monthly updates may become  
19  
20 318 necessary.

21  
22  
23  
24 319 With respect to the growing literature, the use of automation tools like CAL<sup>®</sup> for study  
25  
26 320 selection will become essential to ensure a highly sensitive yield of relevant studies,  
27  
28 321 responsive timelines for decision-making and reduced workload for reviewers. In this scoping  
29  
30 322 review, we used a continuous active learning approach that integrates machine learning with  
31  
32 323 feedback instructions from reviewers. This approach allowed the screening of approximately  
33  
34 324 290,000 titles/abstracts in about 40 person-hours over 2.3 weeks. We believe this approach is  
35  
36 325 indispensable for future reviews involving large body of literature. This approach called for  
37  
38 326 slight changes in our review conduct and reporting, of note the reported number of the  
39  
40 327 titles/abstracts excluded by the automation tool in the flowchart (see Figure 1).

41  
42  
43  
44 328 There are several limitations of this review. This is a scoping review, and as such, we did not  
45  
46 329 assess the risk of bias in the included studies and reviews. Initially, the review protocol called  
47  
48 330 for a borrowing strength of evidence approach, including studies evaluating treatment for  
49  
50 331 SARS and MERS. The initial literature search in May 2020 included electronic databases,  
51  
52 332 trial registries, Cochrane Library and other grey literature sources. Given the growing  
53  
54 333 literature on COVID-19 by May 2021, the current review was focused only on COVID-19  
55  
56 334 treatment, with relevant studies identified from MEDLINE, EMBASE and pre-print servers.  
57  
58  
59  
60

1  
2  
3 335 In this review, the evaluated treatment options appeared to attain a reasonable chance of  
4  
5 336 being more effective than their comparators, approximately 30% and 50% according to the  
6  
7 337 authors' conclusions from the included studies and reviews, respectively. However, we did  
8  
9 338 not extract outcome data and combined them to verify the authors' conclusions. To provide a  
10  
11 339 broad overview of the comparative effectiveness research on Covid-19 treatment, we  
12  
13 340 included reports from pre-print servers, but these reports had not gone through peer review.  
14  
15 341 Despite these limitations, the methods used in this review were carefully selected to address  
16  
17 342 the needs of our knowledge users from Health Canada and Public Health Agency of Canada.  
18  
19 343 In addition, we made the material from this scoping review available in an online data  
20  
21 344 repository as the data may be useful for conducting systematic reviews of specific therapies  
22  
23 345 or for updating the current review(24).  
24  
25  
26  
27  
28  
29

## 30 346 **CONCLUSIONS**

31 347 This scoping review characterized a growing body of comparative-effectiveness studies and  
32  
33 348 evidence syntheses evaluating hundreds of monotherapy and combination therapy options  
34  
35 349 addressing the multiple sequelae of COVID-19. The results suggest future studies in children,  
36  
37 350 elderly (e.g.,  $\geq 65$  years of age) and patients with mild symptoms, with additional data on  
38  
39 351 outpatient treatment, multi-mechanism therapy, harms and active comparators. The results  
40  
41 352 also suggest that future living evidence synthesis and network meta-analysis would provide  
42  
43 353 additional information for decision-makers on managing COVID-19.  
44  
45  
46  
47  
48  
49  
50  
51  
52  
53  
54  
55  
56  
57  
58  
59  
60

1  
2  
3 354 **DECLARATIONS**  
4

5  
6 355 **Ethics approval and consent to participate**  
7

8 356 Not applicable. This research is exempt from ethics approval because the work is carried out  
9  
10 357 on published documents.  
11

12  
13 358 **Consent for publication**  
14

15 359 Not applicable  
16

17  
18 360 **Availability of data and materials**  
19

20 361 Data sharing is not applicable to this article as no datasets were generated or analysed during  
21  
22 362 the current study.  
23

24  
25 363 **Competing interests**  
26

27 364 The authors have no competing interests to declare.  
28

29  
30 365 **Funding**  
31

32 366 This work was supported through the Drug Safety and Effectiveness Network funded by the  
33  
34 367 Canadian Institutes of Health Research [DMC-166263], the funders had no involvement in  
35  
36 368 the design, conduct, or publication of this study. SES is funded by a Tier 1 Canada Research  
37  
38 369 Chair in Knowledge Translation [17-0245-SUB] and the Mary Trimmer Chair in Geriatric  
40  
41 370 Medicine (award number is not applicable); ACT is funded by a Tier 2 Canada Research  
42  
43 371 Chair in Knowledge Synthesis [17-0126-AWA].  
44

45  
46 372 **Open Access**  
47

48 373 This is an Open Access article distributed in accordance with the Creative Commons  
49  
50 374 Attribution Non Commercial (CC BY-NC 4.0) license, which permits others to distribute,  
51  
52 375 remix, adapt, build upon this work non-commercially, and license their derivative works on  
53  
54 376 different terms, provided the original work is properly cited and the use is non-commercial.  
55  
56  
57 377 See: <http://creativecommons.org/licenses/by-nc/4.0/>  
58

59  
60 378 **Authors' contributions**



1  
2  
3 379 PR and BP analyzed the data, interpreted the results and drafted the original and revised  
4  
5 380 manuscript, respectively. ACT and SES conceived and designed the study, helped obtain  
6  
7 381 funding, interpreted the results and helped write sections of the manuscript. GVC and MRG  
8  
9 382 provided methodological and technical support and edited the manuscript. AR, ND, JA and  
10  
11 383 FY coordinated the review, screened citations and full-text articles, abstracted data, resolved  
12  
13 384 discrepancies and edited the manuscript. MK, MP and MM helped conceive the study,  
14  
15 385 provided methodological support and content expertise and edited the manuscript. RR and  
16  
17 386 MG provided methodological support, screened citations and full-text articles and assisted  
18  
19 387 with drafting the manuscript. CW, NR, EM and RW screened citations and full-text articles,  
20  
21 388 abstracted data and assisted with data analysis. All authors read and approved the final  
22  
23 389 manuscript.

## 24 390 **Acknowledgements**

25  
26 391 The authors would like to thank Jesse McGowan for her assistance in developing literature  
27  
28 392 searches, Alissa Epworth for her assistance executing searches and retrieving articles, and  
29  
30 393 Krystle Amog and Navjot Mann for their assistance in formatting this manuscript.

## 31 394 **Additional File**

32 395 **File Format:** Microsoft Word (.docx)

33 396 **Title of Data:** Additional File 1 (Appendices 1-6)

34 397 **Description of Data:** The appendices include the following additional information:

35 398 Appendix 1 – The Continuous Active Learning (CAL<sup>®</sup>) tool

36 399 Appendix 2 – EMBASE search strategy

37 400 Appendix 3 – List of drugs from Health Canada and Public Health Agency of Canada

38 401 Appendix 4 – List of included primary studies

39 402 Appendix 5 – List of included knowledge syntheses

40 403 Appendix 6 – Additional details for the Results section

1  
2  
3  
4  
5  
6  
7  
8  
9  
10  
11  
12  
13  
14  
15  
16  
17  
18  
19  
20  
21  
22  
23  
24  
25  
26  
27  
28  
29  
30  
31  
32  
33  
34  
35  
36  
37  
38  
39  
40  
41  
42  
43  
44  
45  
46  
47  
48  
49  
50  
51  
52  
53  
54  
55  
56  
57  
58  
59  
60

404 **FIGURE LEGEND**

405 Figure 1. Flow diagram of included studies

406 Study Flow Diagram

407 Figure 2. Timing of available online of included studies\*

408 Online timing chart of included studies

For peer review only

## TABLES

Table 1. Study, participant and outcome characteristics

| Study characteristics              | Total (n=616) | RCT (n=188)   | Non-RCT (n=428) |
|------------------------------------|---------------|---------------|-----------------|
| <b>Study design</b>                |               |               |                 |
| RCT                                | 188 (31%)     | 188           |                 |
| Retrospective cohort               | 304 (49%)     |               | 304 (71%)       |
| Prospective cohort                 | 70 (11%)      |               | 70 (16%)        |
| Case-control                       | 27 (4%)       |               | 27 (6%)         |
| Controlled clinical trial          | 23 (4%)       |               | 23 (5%)         |
| Controlled before-after            | 4 (1%)        |               | 4 (1%)          |
| <b>Study setting</b>               |               |               |                 |
| Acute care hospital                | 515 (84%)     | 145 (77%)     | 370 (86%)       |
| Intensive care unit                | 44 (7%)       | 4 (2%)        | 40 (9%)         |
| Community                          | 42 (7%)       | 34 (18%)      | 8 (2%)          |
| Community and hospital             | 6 (1%)        | 3 (2%)        | 3 (1%)          |
| Nursing home                       | 3 (0%)        | 0 (0%)        | 3 (1%)          |
| Not reported                       | 6 (1%)        | 2 (1%)        | 4 (1%)          |
| <b>Country</b>                     |               |               |                 |
| United States                      | 161 (26)      | 37 (20)       | 124 (29)        |
| China                              | 107 (17)      | 27 (14)       | 80 (19)         |
| Italy                              | 47 (8)        | 2 (1)         | 45 (11)         |
| Spain                              | 41 (7)        | 3 (2)         | 38 (9)          |
| France                             | 39 (6)        | 5 (3)         | 34 (8)          |
| India                              | 23 (4)        | 15 (8)        | 8 (2)           |
| Iran                               | 21 (3)        | 15 (8)        | 6 (1)           |
| United Kingdom                     | 21 (3)        | 19 (10)       | 2 (0)           |
| Brazil                             | 17 (3)        | 13 (7)        | 4 (1)           |
| Turkey                             | 12 (2)        | 1 (1)         | 11 (3)          |
| Mexico                             | 11 (2)        | 6 (3)         | 5 (1)           |
| Argentina                          | 10 (2)        | 7 (4)         | 3 (1)           |
| <b>Study duration</b>              |               |               |                 |
| Median duration in days (IQR)      | 28 (14, 30)   | 21.5 (14, 28) | 28 (20, 35)     |
| <b>Sample size</b>                 |               |               |                 |
| Median # participants (IQR)        | 169 (74, 475) | 120 (60, 394) | 194 (82, 592)   |
| <b>Study sponsor</b>               |               |               |                 |
| Public                             | 206 (33%)     | 78 (41%)      | 128 (30%)       |
| No funding                         | 165 (27%)     | 21 (11%)      | 144 (34%)       |
| Private                            | 63 (10%)      | 50 (27%)      | 13 (3%)         |
| Public & private                   | 18 (3%)       | 13 (7%)       | 5 (1%)          |
| Not reported                       | 164 (27%)     | 26 (14%)      | 138 (33%)       |
| <b>Participant characteristics</b> |               |               |                 |

| <b>Study characteristics</b>                           | <b>Total (n=616)</b> | <b>RCT (n=188)</b> | <b>Non-RCT (n=428)</b> |
|--------------------------------------------------------|----------------------|--------------------|------------------------|
| <b>Average age (years)</b>                             |                      |                    |                        |
| Median (range)                                         | 60 (6, 88)           | 56 (27, 77)        | 62 (6, 88)             |
| <b>Average percent of male participants</b>            |                      |                    |                        |
| Median (IQR)                                           | 61 (53, 69)          | 59 (50, 66)        | 62 (54, 70)            |
| <b>SARS-CoV-2 diagnosis</b>                            |                      |                    |                        |
| Polymerase chain reaction (PCR) test                   | 436 (71%)            | 146 (78%)          | 290 (68%)              |
| PCR and other*                                         | 105 (17%)            | 33 (18%)           | 72 (17%)               |
| Not specified                                          | 75 (12%)             | 9 (5%)             | 66 (15%)               |
| <b>Case severity*</b>                                  |                      |                    |                        |
| Severe                                                 | 163 (26%)            | 39 (21%)           | 124 (29%)              |
| Mild or moderate                                       | 46 (7%)              | 25 (13%)           | 21 (5%)                |
| Moderate or severe                                     | 33 (6%)              | 17 (9%)            | 16 (4%)                |
| Severe or critical                                     | 30 (5%)              | 7 (4%)             | 23 (5%)                |
| Moderate                                               | 24 (4%)              | 14 (8%)            | 10 (2%)                |
| Mild                                                   | 22 (3%)              | 16 (9%)            | 6 (1%)                 |
| Mild, moderate or severe                               | 14 (2%)              | 6 (3%)             | 8 (2%)                 |
| Mild, moderate, severe or critical                     | 8 (1%)               | 2 (1%)             | 6 (1%)                 |
| Moderate, severe or critical                           | 4 (1%)               | 1 (1%)             | 3 (1%)                 |
| <b>Not specified</b>                                   | 117 (19%)            | 34 (19%)           | 83 (19%)               |
| <b>Special age group**</b>                             |                      |                    |                        |
| <b>Elderly (e.g., ≥65 years of age)</b>                | 11 (2%)              | 2 (1%)             | 9 (2%)                 |
| <b>Children (e.g., &lt;16 years of age)</b>            | 2 (0%)               | 1 (1%)             | 1 (0%)                 |
| <b>Type of primary outcome</b>                         |                      |                    |                        |
| <b>Death/survival<sup>1</sup></b>                      | 198 (32%)            | 20 (11%)           | 178 (42%)              |
| <b>Clinical status/measures<sup>2</sup></b>            | 119 (19%)            | 71 (38%)           | 48 (11%)               |
| <b>SARS-CoV-2 virology status/measures<sup>3</sup></b> | 61 (10%)             | 29 (15%)           | 32 (7%)                |
| <b>Respiratory status/measures<sup>4</sup></b>         | 53 (9%)              | 19 (10%)           | 34 (8%)                |
| <b>Safety/adverse events<sup>5</sup></b>               | 43 (7%)              | 9 (5%)             | 34 (8%)                |
| <b>Composite outcome involving death<sup>6</sup></b>   | 39 (6%)              | 10 (5%)            | 29 (7%)                |
| <b>Resources measures<sup>7</sup></b>                  | 20 (3%)              | 6 (3%)             | 14 (3%)                |
| <b>Invasive mechanical ventilation</b>                 | 15 (2%)              | 4 (2%)             | 11 (3%)                |
| <b>Admission to intensive care unit</b>                | 11 (2%)              | 1 (1%)             | 10 (2%)                |

| Study characteristics                           | Total (n=616) | RCT (n=188) | Non-RCT (n=428) |
|-------------------------------------------------|---------------|-------------|-----------------|
| <b>Admission to acute care hospital</b>         | 9 (1%)        | 3 (2%)      | 6 (1%)          |
| <b>Inflammatory status/measures<sup>8</sup></b> | 9 (1%)        | 4 (2%)      | 5 (1%)          |
| Emergency room visit                            | 4 (1%)        | 2 (1%)      | 2 (0%)          |
| <b>Cardiology status/measures<sup>9</sup></b>   | 3 (1%)        | 1 (1%)      | 2 (1%)          |
| <b>Olfactory status/measures<sup>10</sup></b>   | 3 (0%)        | 2 (1%)      | 1 (0%)          |
| Hospital discharge                              | 2 (0%)        | 1 (0%)      | 1 (0%)          |
| <b>Other status/measures<sup>11</sup></b>       | 9 (1%)        | 2 (1%)      | 7 (2%)          |
| Not reported                                    | 18 (3%)       | 4 (2%)      | 14 (3%)         |
| <b>Number of effect outcomes</b>                |               |             |                 |
| Median # of outcomes (IQR)                      | 4 (2, 7)      | 6 (4, 9)    | 3 (2, 6)        |
| <b>Number of harm outcomes</b>                  |               |             |                 |
| Median # of outcomes (IQR)                      | 1 (0, 3)      | 2 (1, 5)    | 0 (0, 2)        |

Notes: IQR – interquartile range. \*Other diagnostic modality such as lung imaging or suspected Covid-19 cases. •Case severity according to the clinical spectrum of SARS-CoV-2 infection by the National Institute of Health(25) \*\*Age group as reported in the included studies. <sup>1</sup>Death/survival or time to death. <sup>2</sup>Clinical status/measures such as improvement/deterioration or time to such events. <sup>3</sup>SARS-CoV-2 virology status/measures such as viral load or duration to Polymerase Chain Reaction negative. <sup>3</sup>Respiratory status/measures such as whole lung lesion volumes or blood oxygen saturation. <sup>5</sup>Safety/adverse events such as other infections than SARS-CoV-2, acute kidney injury or drug tolerance. <sup>6</sup>Composite endpoints involving death such as death and invasive mechanical ventilation or death and admission to intensive care unit. <sup>7</sup>Resources measures such as length of hospital stay. <sup>8</sup>Inflammatory status/measures such as plasma levels of C-reactive protein, or changes in ROX index, the ratio of SpO<sub>2</sub>/FIO<sub>2</sub>. <sup>9</sup>Cardiology status/measures such as cardia endpoints with max high-sensitivity cardiac troponin level, and stroke. <sup>10</sup>Olfactory status/measures such as loss of smell and taste. <sup>11</sup>Other primary outcome such as time from Covid-19 symptoms onset to treatment or organ support-free days.

Table 2. Treatment options frequently evaluated in included studies

|                                                   |              |            |                |
|---------------------------------------------------|--------------|------------|----------------|
| <b>All individual treatments</b>                  | <b>Total</b> | <b>RCT</b> | <b>Non-RCT</b> |
| <b>Total</b>                                      | <b>827</b>   | <b>231</b> | <b>596</b>     |
| 1. Tocilizumab                                    | 87 (11%)     | 12 (5%)    | 75 (13%)       |
| 2. Hydroxychloroquine                             | 78 (9%)      | 22 (10%)   | 56 (9%)        |
| 3. Convalescent Plasma                            | 55 (7%)      | 15 (6%)    | 40 (7%)        |
| 4. Steroid                                        | 37 (4%)      | 1 (0%)     | 36 (6%)        |
| 5. Lopinavir/Ritonavir                            | 29 (4%)      | 5 (2%)     | 24 (4%)        |
| 6. Methylprednisolone                             | 26 (3%)      | 3 (1%)     | 23 (4%)        |
| 7. Remdesivir                                     | 25 (3%)      | 16 (7%)    | 9 (2%)         |
| 8. Enoxaparin                                     | 18 (2%)      | 1 (0%)     | 17 (3%)        |
| 9. Hydroxychloroquine/Azithromycin                | 18 (2%)      | 2 (1%)     | 16 (3%)        |
| 10. Anakinra                                      | 16 (2%)      | 2 (1%)     | 14 (2%)        |
| <b>Treatment type - Common single treatment</b>   | <b>Total</b> | <b>RCT</b> | <b>Non-RCT</b> |
| <b>All single treatments</b>                      | <b>711</b>   | <b>202</b> | <b>509</b>     |
| 1. NS-Immunosuppressant                           | 126 (18%)    | 27 (13%)   | 99 (19%)       |
| 2. Steroid                                        | 110 (15%)    | 15 (7%)    | 95 (19%)       |
| 3. Antiviral                                      | 97 (14%)     | 40 (20%)   | 57 (11%)       |
| 4. Antimalarial                                   | 87 (12%)     | 25 (12%)   | 62 (12%)       |
| 5. Anticoagulant                                  | 66 (5%)      | 5 (3%)     | 61 (12%)       |
| Anticoagulant-Therapeutic                         | 17 (2%)      | 2 (1%)     | 15 (3%)        |
| Anticoagulant-Prophylactic                        | 14 (2%)      | 0 (0%)     | 14 (3%)        |
| 6. Convalescent Plasma                            | 56 (8%)      | 16 (8%)    | 40 (8%)        |
| 7. Antibiotic                                     | 29 (4%)      | 7 (3%)     | 22 (4%)        |
| 8. Anti-Inflammatory                              | 20 (3%)      | 8 (4%)     | 12 (2%)        |
| 9. Interferon Therapy                             | 16 (2%)      | 7 (3%)     | 9 (2%)         |
| 10. Anti-parasitic                                | 14 (2%)      | 12 (6%)    | 2 (0%)         |
| 10. Immunomodulatory                              | 14 (2%)      | 4 (2%)     | 10 (2%)        |
| <b>Treatment type – Common combined treatment</b> |              |            |                |
| <b>All combined treatment option</b>              | <b>116</b>   | <b>29</b>  | <b>87</b>      |
| 1. Antimalarial/Antibiotic                        | 19 (16%)     | 2 (7%)     | 17 (20%)       |
| 2. Steroid/NS-Immunosuppressant                   | 10 (9%)      | 0 (0%)     | 10 (11%)       |
| 3. Antimalarial/Antiviral/Antiviral               | 8 (7%)       | 1 (3%)     | 7 (8%)         |
| 4. Antiviral/Antiviral                            | 5 (4%)       | 3 (10%)    | 2 (2%)         |
| 4. Antiviral/Interferon                           | 5 (4%)       | 0 (0%)     | 5 (6%)         |
| 5. Antimalarial/Antiviral                         | 4 (3%)       | 0 (0%)     | 4 (5%)         |
| 5. Antimalarial/Antiviral/Antibiotic              | 4 (3%)       | 4 (14%)    | 0 (0%)         |
| 5. Anti-parasitic/Antibiotic                      | 4 (3%)       | 3 (10%)    | 1 (1%)         |
| 5. Antiviral/Antiviral/Antiviral                  | 4 (3%)       | 0 (0%)     | 4 (5%)         |

|                                                    |        |         |        |
|----------------------------------------------------|--------|---------|--------|
| <b>5. Antiviral/Antiviral/Antiviral/Interferon</b> | 4 (3%) | 0 (0%)  | 4 (5%) |
| <b>5. Antiviral/NS-Immunosuppressant</b>           | 4 (3%) | 3 (10%) | 1 (1%) |
| <b>5. NS-Immunosuppressant/Steroid</b>             | 4 (3%) | 0 (0%)  | 4 (5%) |

Note: NS-immunosuppressant: non-steroidal immunosuppressant.

For peer review only

**Table 3. Evidence Synthesis characteristics**

|                                              | <b>All<br/>(n=299)</b> | <b>With protocol<br/>(n=88)</b> | <b>Without protocol<br/>(n=211)</b> |
|----------------------------------------------|------------------------|---------------------------------|-------------------------------------|
| <b>Review type</b>                           |                        |                                 |                                     |
| Systematic review with meta-analysis         | 189 (63%)              | 66 (75%)                        | 123 (58%)                           |
| Systematic review                            | 73 (24%)               | 15 (17%)                        | 58 (27%)                            |
| Meta-analysis                                | 12 (4%)                | 0 (0%)                          | 12 (6%)                             |
| Scoping review                               | 10 (3%)                | 3 (3%)                          | 7 (3%)                              |
| Rapid review                                 | 8 (3%)                 | 1 (1%)                          | 7 (3%)                              |
| Network meta-analysis                        | 2 (1%)                 | 1 (1%)                          | 1 (0%)                              |
| Rapid review with meta-analysis              | 2 (1%)                 | 1 (1%)                          | 1 (0%)                              |
| Systematic review with network meta-analysis | 2 (1%)                 | 0 (0%)                          | 2 (1%)                              |
| Overview of systematic reviews               | 1 (0%)                 | 1 (1%)                          | 0 (0%)                              |
| <b>Review abstract</b>                       |                        |                                 |                                     |
| Structured abstract                          | 159 (53%)              | 47 (53%)                        | 112 (53%)                           |
| Abstract with no structure                   | 140 (47%)              | 41 (47%)                        | 99 (47%)                            |
| <b>Eligibility criteria</b>                  |                        |                                 |                                     |
| Report eligibility criteria                  | 259 (87%)              | 86 (98%)                        | 173 (82%)                           |
| Eligibility criteria are unclear             | 40 (13%)               | 2 (2%)                          | 38 (18%)                            |
| <b>Include randomized controlled trials</b>  |                        |                                 |                                     |
| Include RCTs only                            | 51 (17%)               | 19 (22%)                        | 32 (15%)                            |
| Include different study designs              | 248 (83%)              | 69 (78%)                        | 179 (85%)                           |
| <b>Number of data sources</b>                |                        |                                 |                                     |
| Median (IQR)                                 | 5 (3, 6)               | 6 (4, 7)                        | 4 (3, 6)                            |
| <b>Number of included studies</b>            |                        |                                 |                                     |
| Median (IQR)                                 | 14 (7, 28)             | 17 (7, 38)                      | 14 (7, 25)                          |
| <b>Common country</b>                        |                        |                                 |                                     |
| 1. United States                             | 57 (19%)               | 13 (15%)                        | 44 (21%)                            |
| 2. China                                     | 40 (14%)               | 13 (15%)                        | 27 (13%)                            |
| 3. India                                     | 34 (11%)               | 12 (13%)                        | 22 (10%)                            |
| 4. Iran                                      | 18 (6%)                | 3 (3%)                          | 15 (7%)                             |
| 4. United Kingdom                            | 18 (6%)                | 3 (3%)                          | 15 (7%)                             |
| 5. Saudi Arabia                              | 13 (4%)                | 1 (1%)                          | 12 (6%)                             |
| 6. Canada                                    | 12 (4%)                | 5 (6%)                          | 7 (3%)                              |
| 7. Italy                                     | 12 (4%)                | 8 (9%)                          | 4 (2%)                              |
| 8. Indonesia                                 | 9 (3%)                 | 2 (2%)                          | 7 (3%)                              |
| 9. Malaysia                                  | 7 (2%)                 | 0 (0%)                          | 7 (3%)                              |
| 10. Egypt                                    | 5 (2%)                 | 2 (2%)                          | 3 (1%)                              |
| 10. France                                   | 5 (2%)                 | 3 (3%)                          | 2 (1%)                              |
| 10. Peru                                     | 5 (2%)                 | 1 (1%)                          | 4 (2%)                              |
| 10. Taiwan                                   | 5 (2%)                 | 1 (1%)                          | 4 (2%)                              |

Note: RCT: randomized controlled trial. IQR: inter-quartile range.



**Table 4. Treatment options evaluated in systematic reviews**

| <b>Treatment option</b>         | <b>Total<br/>(n=518)</b> | <b>With protocol<br/>(n=152)</b> | <b>Without protocol<br/>(n=366)</b> |
|---------------------------------|--------------------------|----------------------------------|-------------------------------------|
| Hydroxychloroquine              | 58 (11%)                 | 15 (10%)                         | 43 (12%)                            |
| Remdesivir                      | 39 (8%)                  | 11 (7%)                          | 28 (8%)                             |
| Tocilizumab                     | 35 (7%)                  | 10 (7%)                          | 25 (7%)                             |
| Corticosteroid                  | 35 (7%)                  | 10 (7%)                          | 25 (7%)                             |
| Convalescent Plasma             | 33 (6%)                  | 10 (7%)                          | 23 (6%)                             |
| Lopinavir-Ritonair              | 24 (5%)                  | 8 (5%)                           | 16 (4%)                             |
| Chloroquine                     | 19 (4%)                  | 6 (4%)                           | 13 (4%)                             |
| Hydroxychloroquine/Azithromycin | 14 (3%)                  | 1 (1%)                           | 13 (4%)                             |
| Antivirals                      | 12 (2%)                  | 4 (3%)                           | 8 (2%)                              |
| Anticoagulant                   | 11 (2%)                  | 2 (1%)                           | 9 (2%)                              |
| Azithromycin                    | 11 (2%)                  | 3 (2%)                           | 8 (2%)                              |
| Favipiravir                     | 10 (2%)                  | 1 (1%)                           | 9 (2%)                              |
| Hydroxychloroquine/Chloroquine  | 10 (2%)                  | 4 (3%)                           | 6 (2%)                              |
| Colchicine                      | 9 (2%)                   | 2 (1%)                           | 7 (2%)                              |
| Dexamethasone                   | 9 (2%)                   | 1 (1%)                           | 8 (2%)                              |
| Arbidol                         | 7 (1%)                   | 1 (1%)                           | 6 (2%)                              |
| Invermectin                     | 7 (1%)                   | 3 (2%)                           | 4 (1%)                              |
| Glucocorticoid                  | 7 (1%)                   | 3 (2%)                           | 4 (1%)                              |
| ACEI/ARB                        | 6 (1%)                   | 4 (3%)                           | 2 (1%)                              |
| Therapeutic Anticoagulant       | 5 (1%)                   | 2 (1%)                           | 3 (1%)                              |
| Prophylactic Anticoagulant      | 4 (1%)                   | 3 (2%)                           | 1 (0%)                              |
| Anakinra                        | 4 (1%)                   | 3 (2%)                           | 1 (0%)                              |
| Famotidine                      | 4 (1%)                   | 1 (1%)                           | 3 (1%)                              |
| JAK-Inhibitors                  | 4 (1%)                   | 2 (1%)                           | 2 (1%)                              |
| Sarilumab                       | 4 (1%)                   | 4 (3%)                           | 0 (0%)                              |

Note: JAK-inhibitors: Janus kinase (JAK) inhibitors. HCQ: Hydroxychloroquine.

ACEI/ARB: Angiotensin Converting Enzyme Inhibitors and Angiotensin-Receptor Blockers

**Table 5. Treatment evaluation according to authors' conclusion**

| <b>Studies evaluating treatment benefits/harms</b> | <b>All studies</b> | <b>RCT</b>           | <b>Non-RCT</b>          |
|----------------------------------------------------|--------------------|----------------------|-------------------------|
| # of evaluated treatment arms                      | 827                | 231                  | 596                     |
| Favor evaluated treatment                          | 413 (50%)          | 120 (52%)            | 293 (49%)               |
| Favor control                                      | 63 (8%)            | 15 (7%)              | 48 (8%)                 |
| Indeterminate/neutral                              | 258 (31%)          | 90 (39%)             | 168 (28%)               |
| <b>Reviews evaluating treatment benefits/harms</b> | <b>All reviews</b> | <b>With protocol</b> | <b>Without protocol</b> |
| # of evaluated treatment arms                      | 518                | 152                  | 366                     |
| Favor evaluated treatment                          | 185 (36%)          | 50 (33%)             | 135 (37%)               |
| Favor control                                      | 64 (12%)           | 18 (12%)             | 46 (13%)                |
| Indeterminate/neutral                              | 182 (35%)          | 68 (45%)             | 114 (31%)               |

## REFERENCES

1. Organization WH. Novel Coronavirus (2019-nCoV): situation report, 22: World Health Organization; 2020 [updated February 11, 2020; cited 2020 August 18]. Available from: [https://www.who.int/docs/default-source/coronaviruse/situation-reports/20200211-sitrep-22-ncov.pdf?sfvrsn=fb6d49b1\\_2](https://www.who.int/docs/default-source/coronaviruse/situation-reports/20200211-sitrep-22-ncov.pdf?sfvrsn=fb6d49b1_2).
2. Organization WH. Coronavirus disease 2019 (COVID-19) Situation Report – 101 2020 [updated April 30, 2020; cited 2020 August 18]. Available from: [https://www.who.int/docs/default-source/coronaviruse/situation-reports/20200430-sitrep-101-covid-19.pdf?sfvrsn=2ba4e093\\_2](https://www.who.int/docs/default-source/coronaviruse/situation-reports/20200430-sitrep-101-covid-19.pdf?sfvrsn=2ba4e093_2).
3. ClinicalTrials.gov [Internet]. Bethesda (MD): National Library of Medicine (US). 2000 Feb 29
4. PROSPERO - International prospective register of systematic reviews.
5. Ahmad A, Salsabil M, Oliver T. Mortality rates in matched cohort, pseudo-randomised and randomised trials of convalescent plasma given to COVID-19 patients. medRxiv. 2020.
6. Bhowmick S, Dang A, Vallish B, Dang S. Safety and Efficacy of Ivermectin and Doxycycline Monotherapy and in Combination in the Treatment of COVID-19: A Scoping Review. *Drug Saf.* 2021:1-10.
7. Liao G, Zheng K, Lalu MM, Fergusson DA, Allan DS. A scoping review of registered clinical trials of cellular therapy for COVID-19 and a Framework for Accelerated Synthesis of Trial Evidence—FAST evidence. *Transfus Med Rev.* 2020;34(3):165-71.
8. Mori H, Ohkawara H, Togawa R, Rikimaru M, Shibata Y, Ikezoe T. Diagnosis and treatment of disseminated intravascular coagulation in COVID-19 patients: a scoping review. *Int J Hematol.* 2021:1-10.
9. Tritschler T, Mathieu ME, Skeith L, Rodger M, Middeldorp S, Brighton T, et al. Anticoagulant interventions in hospitalized patients with COVID-19: A scoping review of randomized controlled trials and call for international collaboration. *J Thromb Haemos.* 2020;18(11):2958-67.
10. JBI Manual for Evidence Synthesis 2020 [cited 2020 August 18]. Available from: <https://synthesismanual.jbi.global>.
11. McGowan J, Sampson M, Salzwedel DM, Cogo E, Foerster V, Lefebvre C. PRESS Peer Review of Electronic Search Strategies: 2015 Guideline Statement. *J Clin Epidemiol.* 2016;75:40-6.
12. Tricco AC, Lillie E, Zarin W, O'Brien KK, Colquhoun H, Levac D, et al. PRISMA Extension for Scoping Reviews (PRISMA-ScR): Checklist and Explanation. *Ann Intern Med.* 2018;169(7):467-73.
13. Peters MD, Marnie C, Tricco AC, Pollock D, Munn Z, Alexander L, et al. Updated methodological guidance for the conduct of scoping reviews. *JBI Evid Synth.* 2020;18(10):2119-26.
14. Cormack GV, Grossman MR. Technology-Assisted Review in Empirical Medicine: Waterloo Participation in CLEF eHealth 2018 2018 [cited 2020 August 18]. Available from: [http://ceur-ws.org/Vol-2125/paper\\_89.pdf](http://ceur-ws.org/Vol-2125/paper_89.pdf).
15. Wishart DS, Feunang YD, Guo AC, Lo EJ, Marcu A, Grant JR, et al. DrugBank 5.0: a major update to the DrugBank database for 2018. *Nucleic Acids Res.* 2018;46(D1):D1074-D82.

16. Venkatesulu BP, Thoguluva Chandrasekar V, Giridhar P, Patel HK, Manteuffel J. The mechanistic rationale of drugs, primary endpoints, geographical distribution of clinical trials against severe acute respiratory syndrome-related coronavirus-2: A systematic review. *J Med Virol.* 2021;93(2):843-53.
17. Valerio Pascua F, Diaz O, Medina R, Contreras B, Mistroff J, Espinosa D, et al. A multi-mechanism approach reduces length of stay in the ICU for severe COVID-19 patients. *PLoS One.* 2021;16(1):e0245025.
18. Tricco AC, Tetzlaff J, Brehaut J, Moher D. Non-Cochrane vs. Cochrane reviews were twice as likely to have positive conclusion statements: cross-sectional study. *J Clin Epidemiol.* 2009;62(4):380-6. e1.
19. Monod M, Blenkinsop A, Xi X, Hebert D, Bershan S, Tietze S, et al. Age groups that sustain resurging COVID-19 epidemics in the United States. *Science.* 2021;371(6536):eabe8372.
20. Tran Kiem C, Bosetti P, Paireau J, Crepey P, Salje H, Lefrancq N, et al. SARS-CoV-2 transmission across age groups in France and implications for control. *Nat Commun.* 2021;12(1):1-12.
21. Boutron I, Page MJ, Higgins JPT, Altman DG, Lundh A, A H. Chapter 7: Considering bias and conflicts of interest among the included studies. In: Higgins JPT, Thomas J, Chandler J, Cumpston M, Li T, Page MJ, et al., editors. *Cochrane Handbook for Systematic Reviews of Interventions* version 6.2 (updated February 2021): Cochrane 2021; 2021.
22. Chaimani A, Caldwell DM, Li T, Higgins JP, Salanti G. Chapter 11: Undertaking network meta-analyses. *Cochrane Handbook for Systematic Reviews of Interventions.* 2019;6.
23. Thomas J, Askie L, Berlin J. Chapter 22: Prospective approaches to accumulating evidence: Higgins JPT, Thomas J, Chandler J, et al., *Cochrane Handbook for Systematic Reviews of Interventions.* version 6.0 (updated July 2019) Cochrane, 2019.
24. Akl EA, Meerpohl JJ, Elliott J, Kahale LA, Schünemann HJ, Agoritsas T, et al. Living systematic reviews: 4. Living guideline recommendations. *J Clin Epidemiol.* 2017;91:47-53.
25. National Institute of Health. Clinical Spectrum of SARS-CoV-2 Infection 2021 [Available from: <https://www.covid19treatmentguidelines.nih.gov/overview/clinical-spectrum/>].

**Figure 1. Flow diagram of included studies**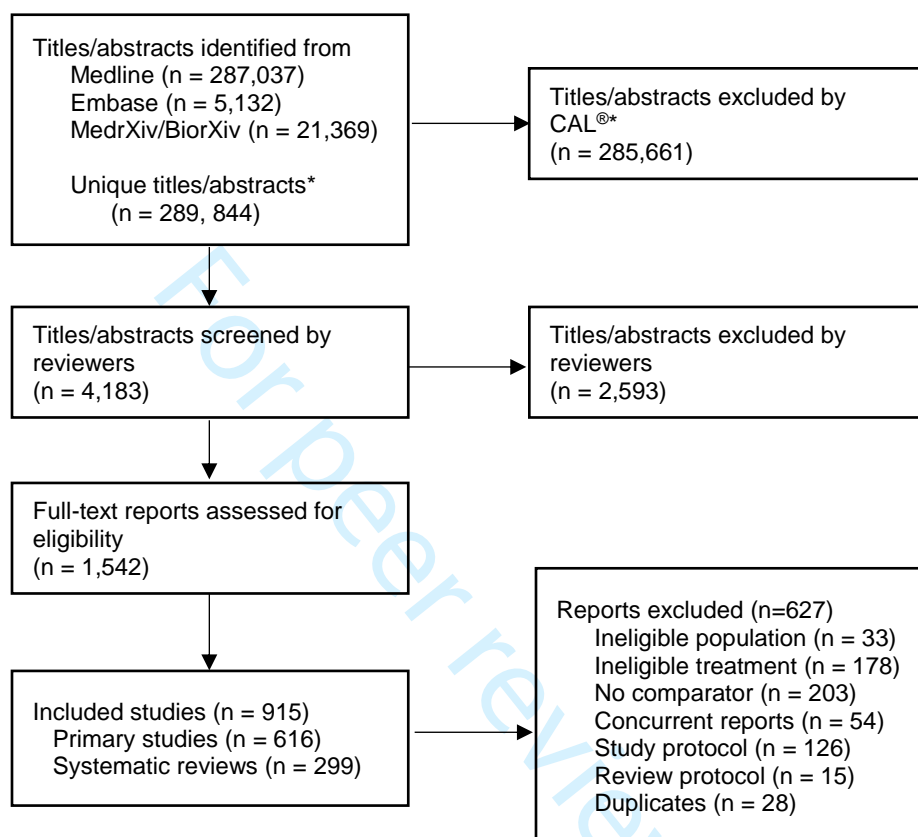

Notes: \*Estimated number of unique titles/abstracts based upon: Medline (Ovid) includes preprints on Covid-19 from Medrxiv and Biorxiv, and large overlapping records between Medline and Embase. The flowchart was modified from the PRISMA 2020 statement.<sup>25</sup>

**Figure 2. Timing of available online of included studies\***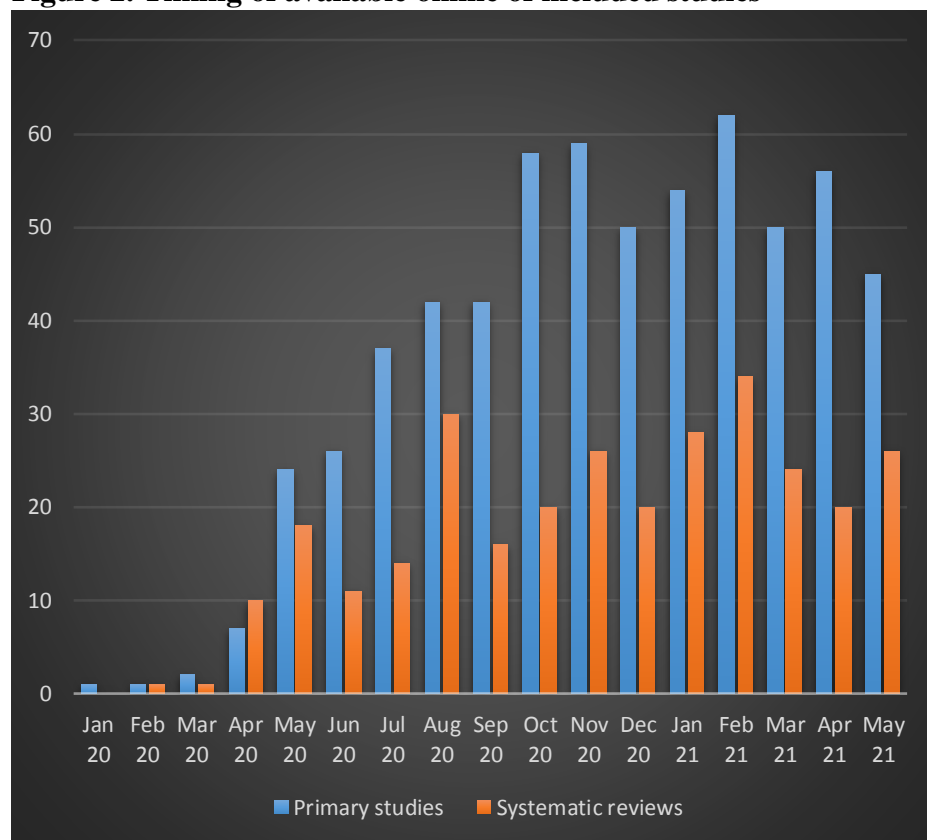

Notes: The numbers of primary studies and systematic reviews for May 21 are higher because the literature search ended at May 15, 2021.

**Comparative-effectiveness research of COVID-19 treatment: A rapid scoping review**

**Appendices**

**Contents**

Appendix 1. The Continuous Active Learning (CAL<sup>®</sup>) tool ..... 1

Appendix 2. EMBASE search strategy ..... 2

Appendix 3. List of drugs from Health Canada and Public Health Agency of Canada ..... 8

Appendix 4. List of included primary studies ..... 10

Appendix 5. List of included knowledge syntheses ..... 56

Appendix 6. Additional details for the Results section ..... 74

Figure A1. Word cloud of description of study participants ..... 74

Table A1. Country of primary study conduct ..... 75

Table A2. Treatment evaluated in primary studies ..... 77

Table A3. Treatment type of single treatment ..... 86

Table A4. Treatment type of combination treatment ..... 87

Table A5. Country of knowledge synthesis conduct ..... 89

Table A6. Treatment evaluated in knowledge syntheses ..... 90

**Appendix 1. The Continuous Active Learning (CAL<sup>®</sup>) tool**

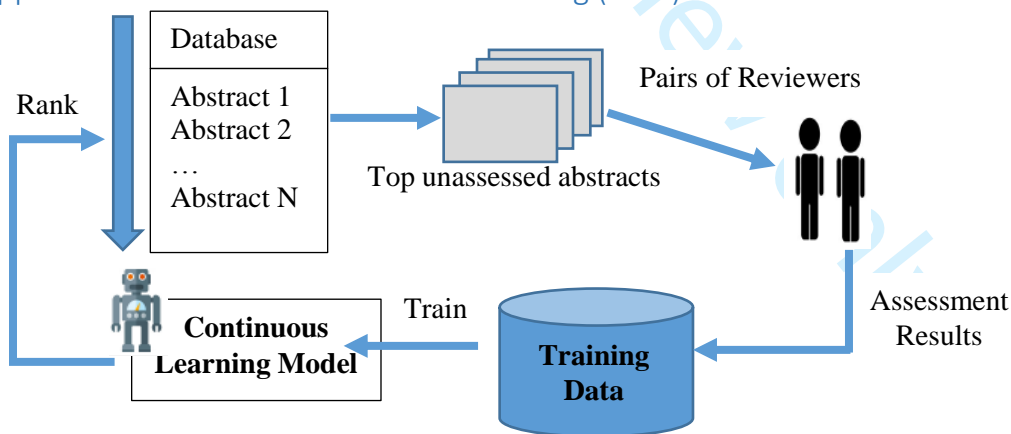

Figure. The algorithm of the CAL<sup>®</sup> tool

The above figure illustrates the algorithm in the CAL<sup>®</sup> tool. Text of the review question is used to start training the machine-learning model in the Continuous Active Learning (CAL) method. The CAL model predicts and quantifies the relevance of abstracts from a database. The abstracts are ranked in order of highest to lowest relevance. The top ranked abstracts are presented to a pair of human reviewers for relevance screening. The screening results are used to update the CAL model for better prediction, generating another batch of top ranked abstracts for screening in the next iteration of the feedback loop. The goal is to identify all relevant abstracts with minimum screening effort.

## Comparative-effectiveness research of COVID-19 treatment: A rapid scoping review

We selected the CAL<sup>®</sup> tool because it won multiple international competitions in high-recall information retrieval – the process of retrieving all relevant documents with minimal human effort (Table below)

Table. Summary of evidence on the use of the CAL<sup>®</sup> tool for knowledge synthesis conduct

| International Competition                                    | High-recall tasks                                | Key findings                                                                                                                                                                                                                                                                       |
|--------------------------------------------------------------|--------------------------------------------------|------------------------------------------------------------------------------------------------------------------------------------------------------------------------------------------------------------------------------------------------------------------------------------|
| Conference and Labs of the Evaluation Forum 2018 (1)         | 30 systematic reviews of diagnostic test studies | <i>Task 1:</i> Without any manual effort to construct literature search strategies, the CAL <sup>®</sup> tool was the most accurate with 97% recall (sensitivity). <i>Task 2:</i> For screening literature search results, CAL <sup>®</sup> was the most accurate with 99% recall. |
| Conference and Labs of the Evaluation Forum 2017 (2)         | 50 systematic reviews of diagnostic test studies | The CAL <sup>®</sup> tool was a top performer among the 14 tested with 97% to 100% recall at pre-defined stopping threshold.                                                                                                                                                       |
| Text Retrieval Conference Total Recall Tracks 2015/16 (3, 4) | 8 legal, clinical, news, email collections       | The CAL <sup>®</sup> tool attained an overall effectiveness not surpassed by any submitted method, manual or automatic.                                                                                                                                                            |

For archives that could be retrieved in their entirety (e.g., MEDLINE, pre-print servers), the CAL<sup>®</sup> tool applied broad relevant search terms using the following Posix command:

```
egrep -i 'coronav|corona vir|wuhan|hubei|huanan|[^a-z]ncov|cov2|cov.2|novel.cov|covid|sars-cov'
```

### References

1. Evangelos Kanoulas, Dan Li, Leif Azzopardi, et al. CLEF 2018 Technologically Assisted Reviews in Empirical Medicine Overview. 2018.
2. Kanoulas E, Li D, Azzopardi L, et al. CLEF 2017 technologically assisted reviews in empirical medicine overview. CEUR Workshop Proceedings, 2017.
3. Roegiest A, Cormack G, Grossman M, et al. TREC 2015 Total Recall track overview TREC. 2015.
4. Cormack GV, MR G. Multi-faceted recall of Continuous Active Learning for Technology-Assisted Review. SIGIR 2015, 2015.

### Appendix 2. EMBASE search strategy

#### Database:

Embase Classic+Embase <1947 to 2021 July 08>

| # | Query                                                                                                                                                           |
|---|-----------------------------------------------------------------------------------------------------------------------------------------------------------------|
| 1 | exp coronaviridae/ or exp Coronaviridae infection/ or exp Coronavirus infection/                                                                                |
| 2 | ((wuhan or hubei or huanan) and (severe acute respiratory or pneumonia* or virus*) and outbreak*).mp.                                                           |
| 3 | (coronavir* or "corona virus*" or "coronavirus pneumonia" or betacoronavir* or COVID or COVID-19).mp.                                                           |
| 4 | ("nCoV" or "cov 2" or cov2 or 2019ncov or 2019-nCoV or "2019 ncov" or "2019-ncov" or "2019 novel cov" or "2019 ncov disease*" or "2019 novel coronavirus*").mp. |
| 5 | "wuhan virus*".mp.                                                                                                                                              |





## Comparative-effectiveness research of COVID-19 treatment: A rapid scoping review

|                                                                                           |                                                                                                                                                                                                                                                                                                                                                                                                                                                                                                                                                                                                                                                                                                                                                                                                                                                                                                                                                                                                                                                                                                                                                      |
|-------------------------------------------------------------------------------------------|------------------------------------------------------------------------------------------------------------------------------------------------------------------------------------------------------------------------------------------------------------------------------------------------------------------------------------------------------------------------------------------------------------------------------------------------------------------------------------------------------------------------------------------------------------------------------------------------------------------------------------------------------------------------------------------------------------------------------------------------------------------------------------------------------------------------------------------------------------------------------------------------------------------------------------------------------------------------------------------------------------------------------------------------------------------------------------------------------------------------------------------------------|
| 1<br>2<br>3<br>4<br>5<br>6<br>7<br>8<br>9<br>10<br>11<br>12<br>13<br>14<br>15<br>16<br>17 | arequine or arthrochin or arthrochine or arthroquine or artrichin or artrichine or artriquine or avloclor or bemaphata or bemaphate or bemasulph or bipiquin or cadiquin or chemochin or chemochine or chingamine or chingaminum or chloraquine or chlorochin or chlorochine or chlorofoz or chloroquin or chloroquin* or cidanchin or "clo-kit junior" or clorichina or clorichine or cloriquine or clorochina or delagil or delagyl or dichinalex or diclokin or diquinalex or diroquine or emquin or genocin or gontochin or gontochine or gontoquine or heliopar or imagon or iroquine or klorokin or klorokine or klorokinfosfat or lagaquin or malaquin or malarex or malarivon or malaviron or maliaquine or maquine or mesylith or mexaquin or mirquin or nivachine or nivaquin* or roquine or quinachl or quingamine or repal or resochoen* or resochoin or resochoina or resochoine or resochoinon resoquina or resoquine or reumachlor or roquine or rp3377 or sanoquin or sanoquine or silbesan or siragan or sirajan or sn7618 or solprina or solprine or tresochin or tresochine or tresoquine or trochin or trochine or troquine).tw. |
| 18<br>19                                                                                  | 16 suramin/                                                                                                                                                                                                                                                                                                                                                                                                                                                                                                                                                                                                                                                                                                                                                                                                                                                                                                                                                                                                                                                                                                                                          |
| 20<br>21                                                                                  | 17 (Carriomycin or Suramin).tw.                                                                                                                                                                                                                                                                                                                                                                                                                                                                                                                                                                                                                                                                                                                                                                                                                                                                                                                                                                                                                                                                                                                      |
| 22<br>23<br>24                                                                            | 18 exp steroid/ or exp meprednisone/ or exp corticosteroid/ or fingolimod/ or leflunomide/ or thalidomide/                                                                                                                                                                                                                                                                                                                                                                                                                                                                                                                                                                                                                                                                                                                                                                                                                                                                                                                                                                                                                                           |
| 25<br>26<br>27                                                                            | 19 (steroid* or methylprednisone or meprednisone or Prednisolone or Fluprednisolone or Corticosteroid* or Fingolimod or Leflunomid* or Thalidomid*).tw.                                                                                                                                                                                                                                                                                                                                                                                                                                                                                                                                                                                                                                                                                                                                                                                                                                                                                                                                                                                              |
| 28<br>29                                                                                  | 20 ruxolitinib/                                                                                                                                                                                                                                                                                                                                                                                                                                                                                                                                                                                                                                                                                                                                                                                                                                                                                                                                                                                                                                                                                                                                      |
| 30<br>31                                                                                  | 21 (Jakotinib or Ruxolitinib).tw.                                                                                                                                                                                                                                                                                                                                                                                                                                                                                                                                                                                                                                                                                                                                                                                                                                                                                                                                                                                                                                                                                                                    |
| 32<br>33                                                                                  | 22 exp monoclonal antibody/                                                                                                                                                                                                                                                                                                                                                                                                                                                                                                                                                                                                                                                                                                                                                                                                                                                                                                                                                                                                                                                                                                                          |
| 34<br>35<br>36<br>37                                                                      | 23 (Ruxolitinib or Tocilizumab or Adalimumab or Camrelizumab or Eculizumab or Mepolizumab or "PD-1 mAb" or Tocilizumab or Adamumab or tozumab or meplazumab or monoclonal antibod*).tw.                                                                                                                                                                                                                                                                                                                                                                                                                                                                                                                                                                                                                                                                                                                                                                                                                                                                                                                                                              |
| 38<br>39<br>40                                                                            | 24 ("SARS-Cov-2 specific neutralizing antibod*" or "SARS-Cov specific neutralizing antibod*" or "MERS-Cov specific neutralizing antibod*" or "Anti C5a monoclonal antibod*").tw.                                                                                                                                                                                                                                                                                                                                                                                                                                                                                                                                                                                                                                                                                                                                                                                                                                                                                                                                                                     |
| 41<br>42<br>43<br>44                                                                      | 25 acetylcysteine/ or exp angiotensin receptor antagonist/ or exp angiotensin derivative/ or exp dipeptidyl carboxypeptidase inhibitor/ or citrate potassium/ or glycyrrhizic acid/ or dipyridamole/ or hydrogen peroxide/ or polyinosinic polycytidylic acid/ or thymosin/ or ascorbic acid/                                                                                                                                                                                                                                                                                                                                                                                                                                                                                                                                                                                                                                                                                                                                                                                                                                                        |
| 46<br>47<br>48<br>49<br>50<br>51                                                          | 26 (Acetylcysteine or Angiotensin or Angiotensin or "ACE inhibitor*" or ACE-2 or "Angiotensin II receptor blocker*" or ARBs or "potassium citrate" or Bromhexine or "Diammonium glycyrrhizinate" or Glycyrrhizic or Dipyridamole or Ebastine or "Hydrogen peroxide" or Pirfenidone or Polyinosinic-polycytidylic or "Polyinosinic-polycytidylic" or "Poly I-C" or "rhG-CSF" or Thymosin* or Tranilast or "Vitamin C" or "Ascorbic Acid*").tw.                                                                                                                                                                                                                                                                                                                                                                                                                                                                                                                                                                                                                                                                                                        |
| 52<br>53                                                                                  | 27 ("inhal*" adj2 gas*).tw.                                                                                                                                                                                                                                                                                                                                                                                                                                                                                                                                                                                                                                                                                                                                                                                                                                                                                                                                                                                                                                                                                                                          |
| 54<br>55<br>56                                                                            | 28 Cyclosporine/                                                                                                                                                                                                                                                                                                                                                                                                                                                                                                                                                                                                                                                                                                                                                                                                                                                                                                                                                                                                                                                                                                                                     |

## Comparative-effectiveness research of COVID-19 treatment: A rapid scoping review

|    |                                                                                                                                                                                                                                                                                                                                                                                                                                                                                                                                                                                                                                                                                                                                                                                                                                                                                                                                                                                                                                                                                                                                                                                                                                                                                                                                                                                                                                                                                                                   |
|----|-------------------------------------------------------------------------------------------------------------------------------------------------------------------------------------------------------------------------------------------------------------------------------------------------------------------------------------------------------------------------------------------------------------------------------------------------------------------------------------------------------------------------------------------------------------------------------------------------------------------------------------------------------------------------------------------------------------------------------------------------------------------------------------------------------------------------------------------------------------------------------------------------------------------------------------------------------------------------------------------------------------------------------------------------------------------------------------------------------------------------------------------------------------------------------------------------------------------------------------------------------------------------------------------------------------------------------------------------------------------------------------------------------------------------------------------------------------------------------------------------------------------|
| 29 | (Cyclosporin or cequa or "cgc 1072" or "cgc1072" or ciclomulsion or cyclasol or de076 or deximune or implanta or imusporin or neuro-stat or neurostat or opsisorin or "otx 101" or padciclo or papilock or "sp 14019" or verkazia).tw.                                                                                                                                                                                                                                                                                                                                                                                                                                                                                                                                                                                                                                                                                                                                                                                                                                                                                                                                                                                                                                                                                                                                                                                                                                                                            |
| 30 | Fenretinide/                                                                                                                                                                                                                                                                                                                                                                                                                                                                                                                                                                                                                                                                                                                                                                                                                                                                                                                                                                                                                                                                                                                                                                                                                                                                                                                                                                                                                                                                                                      |
| 31 | (fenretinide or "mcn r 1967" or "4 hydroxyphenylretinamide" or Ifendopril).tw.                                                                                                                                                                                                                                                                                                                                                                                                                                                                                                                                                                                                                                                                                                                                                                                                                                                                                                                                                                                                                                                                                                                                                                                                                                                                                                                                                                                                                                    |
| 32 | Dalteparin/ or enoxaparin/ or tinzaparin/ or fondaparinux/ or edoxaban/ or rivaroxaban/ or apixaban/ or betrixaban/ or heparin/ or danaparoid/ or warfarin/ or dabigatran.hw.                                                                                                                                                                                                                                                                                                                                                                                                                                                                                                                                                                                                                                                                                                                                                                                                                                                                                                                                                                                                                                                                                                                                                                                                                                                                                                                                     |
| 33 | (dalteparin or fragmin* or "low liquemin" or enoxaparin or clexan or clexane or inhixa or lexane or lovenox or neoparin or neoparin-nx or thorinane or tinzaparin or innohep or logiparin or fondaparinux or quixidar or dabigatran or edoxaban or lixiana or roteas or savaysa or rivaroxaban or xarelto or "bay 59 7939" or apixaban or eliques or eliquis or warfarin or adoisine or carfin or coumadan or coumadin* or marevan or panwarfarin or panwarfin or sofarin or warnerin or betrixaban or bevyxxa or dextience or heparin or Disebrin or hepalean or lipo-hepin or menaven or multiparin or nevparin or panheparin or panheprin or praecivenin or thrombareduct or thromboliquine or vetren or danaparoid or lomoparan or orgaran).tw.                                                                                                                                                                                                                                                                                                                                                                                                                                                                                                                                                                                                                                                                                                                                                               |
| 34 | (Azilsartan or candesartan or eprosartan or Irbesartan or telmisartan or valsartan or losartan or olmesartan).hw. or cobicistat/ or losartan/                                                                                                                                                                                                                                                                                                                                                                                                                                                                                                                                                                                                                                                                                                                                                                                                                                                                                                                                                                                                                                                                                                                                                                                                                                                                                                                                                                     |
| 35 | (Azilsartan or Edarbi or "tak 536" or tak536 or candesartan or amcandin or amlodipine or amlopres or camlostar or candam or candeamio or candezek or caramlo or framsyl or unisia or zenicamo or Atacand or eprosartan or epratenz or futuran or naviten or navixen or regulaten or "skf 108566" or "skf108566" or tevesten or tevetan or teveten or tevetenz or Irbesartan or irbertan or Avapro or telmisartan or approvel or aprovel or "arbez lr" or avapro or ifirmasta or irban or irbetan or iretensa or irovel or irvell or karvea or sabervel or Micardis or valsartan or Diovan* or Prexxartan or saval or losartan or Cozaar or entrizen or lavestra or lorista or Olmesartan or Benicar or sarten or entresto or sacubitril or valsartan or byvalson or neбиволол or A viptadil or Losartan or cozaar or cobicistat or tybost or actelsar or kinzal mono or kinzalmono or micardis or predxal or pritor or pritoral or semintra or telma-20 or tolura or angiosan or cordinate or dalzad ordiovan or diovane or kalpress or miten or nisis or prexxartan or provas or rixil or saval or tareg or tazea or troval or valpression or vals or valsocard or valtan or valtsu or alteis or belsar or benetor or benevas or benicar or cs866 or ixia or laresin or mencord or mesar or olartan or olmeblo or olmec or olmes or Olmesartan or olmetec or olpresor olsar or omesar or openvas or plaunac or rnh6270 or santini or sarten or tensar or tensiol or vivactra or votum or byvalson or cozaar).tw. |
| 36 | (benazepril or Captopril or Cilazapril or Enalapril or Fosinopril or Lisinopril or Perindopril Quinapril or Ramipril or Trandolapril).hw.                                                                                                                                                                                                                                                                                                                                                                                                                                                                                                                                                                                                                                                                                                                                                                                                                                                                                                                                                                                                                                                                                                                                                                                                                                                                                                                                                                         |
| 37 | (Benazepril or Lotensin or Captopril or Benace or boncordin or briem or brien or "cgs 148241" or "cgs 14824a" or "cgs148241" or "cgs14824a" or cibace or cibacen* or fortekor or lotensin or tenkuoren or zinadril or ace-bloc or acenorm or acepress or acepril or aceprilex or aceril or aceten or adocor or alopresin or altran or apuzin or asisten or capace or capocard or caposan or capoten* capotril or capril or captace or captensin or capti or captoflux or captohexal or captolane or captomax or capton or captopren or captoprilan or captoril or captral or cardiopril or cardipril or                                                                                                                                                                                                                                                                                                                                                                                                                                                                                                                                                                                                                                                                                                                                                                                                                                                                                                           |

## Comparative-effectiveness research of COVID-19 treatment: A rapid scoping review

|                                                                                                                |                                                                                                                                                                                                                                                                                                                                                                                                                                                                                                                                                                                                                                                                                                                                                                                                                                                                                                                                                                                                                                                                                                                                                                                                                                                                                                                                                                                                                                                                                                                                                      |
|----------------------------------------------------------------------------------------------------------------|------------------------------------------------------------------------------------------------------------------------------------------------------------------------------------------------------------------------------------------------------------------------------------------------------------------------------------------------------------------------------------------------------------------------------------------------------------------------------------------------------------------------------------------------------------------------------------------------------------------------------------------------------------------------------------------------------------------------------------------------------------------------------------------------------------------------------------------------------------------------------------------------------------------------------------------------------------------------------------------------------------------------------------------------------------------------------------------------------------------------------------------------------------------------------------------------------------------------------------------------------------------------------------------------------------------------------------------------------------------------------------------------------------------------------------------------------------------------------------------------------------------------------------------------------|
| 1<br>2<br>3<br>4<br>5<br>6<br>7<br>8<br>9<br>10<br>11                                                          | catona or catoplin or catopril or cesplon or cryopril or debax or dexacap or dextro captopril or ecapres or ecaten or epicordin or epsitron or farcopril or farmoten or hiperil or hypopress or hypotensor or insucar or iopril or isopresol or katopil or ketanine or keyerpril or lapril or locap or lopirin or lopril or medepres or midrat or minitent or nolectin or "oltens ge" or petacilon or praten or primace or rilcapton or ropril or smarten or tenofax or tensicap tensiomen or tensiomin or tensobon or tensoprel or tensoril or tenzib or topace or toprilem or typril-ace or vasosta or zapto or orkaptil or Cilazapril or dynorm or inhibace or inibace or initiss or inocar).tw.                                                                                                                                                                                                                                                                                                                                                                                                                                                                                                                                                                                                                                                                                                                                                                                                                                                  |
| 12<br>13<br>14<br>15<br>16<br>17<br>18<br>19<br>20<br>21<br>22<br>23<br>24<br>25<br>26<br>27<br>28             | (justor or vascece or Enalapril or Vasotec or bpnorm or dynacil or eliten or fosenopril or fosinil or fosinonorm or fosinopril or fosinorm or fosipres or fositen or fositens or fovas or fozitec or monopril or newace or sapril or sq28555 or staril or vasopril or acerbon or alapril or alfaken or carace or cipril or coric or dapril or fibsol or inopril or linopril or linvas or lipril or lisi abz orlisibeta or lisigamma or lisihexal or lisinopril dihydrate or lisipril or lisodur or lisopress or lisopril orlisoril or lispril or listril or lysinopril or "mk 0521" or "mk 521" or "mk 522" or "mk0521or mk521" or "mk522" or noperten or novatec or presiten or prinil or prinivil or qbrelis or sinopril or tensopril or tensyn or vivatec or zestomax or zestril or Monopri or Lisinopril or Prinivil or Zestril or Perindopril or Coversyl or Quinapril or Accupril or accuprin or accupro or accupron or acequin or acuitel or acuprel or acupril or asig or "ci906" or conan or ectren or korec or quinalapril or quinaten or quinazi or quinhexal or quinipril or Ramipril or acovil or altace or carasel or cardace or corpril or delix or "hoe 498" or hypren or hytren or lostapres or ramace or ramilich or triatec or tritace or unipril or vesdil or vivace or Altace or Trandolapril or Mavik or gopten or Odace or odric or udrik).tw.                                                                                                                                                                                |
| 29<br>30                                                                                                       | 39 Colistin/ or (Teicoplanin or Ivermectin or azithromycin).hw.                                                                                                                                                                                                                                                                                                                                                                                                                                                                                                                                                                                                                                                                                                                                                                                                                                                                                                                                                                                                                                                                                                                                                                                                                                                                                                                                                                                                                                                                                      |
| 31<br>32<br>33<br>34<br>35<br>36<br>37<br>38<br>39<br>40<br>41<br>42<br>43<br>44<br>45<br>46<br>47<br>48<br>49 | (Colistin or belcomycin or colimycin* or belcomycin or Colicort or colimycin or colistine or colomycin or coly mycin or colymycin or multimycin or polymyxin or Teicoplanin or planium or tagocid or talinac or tapocin or targocid or targoplanin or targosid or teichomycin or teichoplanin or teichoplanine or teicomid or teicopix or teiplamil or Planium or Tagocid or talinac or tapocin or targocid or targoplanin or targosid or teichomycin or teichomycin or teichoplanin* or teicomid or teicopix or teiplamil or Ivermectin or Avermectin or cardomec or diapec or efecti or epimekor or eqvalan or eqvalenor or ivermectina or ivermectol or ivexterm or ivomec or mectizan or "mk 933" or "mk933" or oramec or quanox or revectina or seguro or skllice or soolantra or stromectol or azithromycin or aruzilina or atizor or azadose or azasite or azatril or azenil or azibiot or azimin or azithral or azithromycin or azitrocin or azitromax azitromicin* or aziwok or azomyne or aztrin or azydrop or azyter or azithromycin or bazyt or "cp 62933" or "cp 62993" or "cp62933" or "cp62993" or erythromycin or Forcin or Inedol or infectoazit or "isv 401" or "isv401" or kromicin or macrozit or mezatrin or octavax or ordipha or ribotrex or sumamed or tobyl or tromix or trozocina or ultreon or vinzam or xithrone or "xz 450" or "xz450" or Zaret or Zarom or zetamax or zeto or zibramax or zifin or zimericina or zistic or zithromax or zithrox or zitinn or zitrim or zitrobifan or zitrocin or zitromax or zmax).tw. |
| 50<br>51<br>52                                                                                                 | 41 Tamoxifen.hw. or dasatinib/ or Epirubicin/ or Gemcitabine/ or Homoharringtonin/ or Imatinib/ or toremifene/ or Valrubicin/                                                                                                                                                                                                                                                                                                                                                                                                                                                                                                                                                                                                                                                                                                                                                                                                                                                                                                                                                                                                                                                                                                                                                                                                                                                                                                                                                                                                                        |
| 53<br>54<br>55<br>56                                                                                           | 42 (dasatinib or Ellence or Epirubicin* or epid or epifil or epiham or epilem or epirubicine or farmorrubicina or farmorubicin or pharmorubicin or Gemcitabine or difluorodeoxycytidine or Gemcite or gentro or gemzar or infugem or "ly188011" or Homoharringtonine or harringtonine                                                                                                                                                                                                                                                                                                                                                                                                                                                                                                                                                                                                                                                                                                                                                                                                                                                                                                                                                                                                                                                                                                                                                                                                                                                                |

## Comparative-effectiveness research of COVID-19 treatment: A rapid scoping review

|                                                                                  |                                                                                                                                                                                                                                                                                                                                                                                                                                                                                                                                                                                                                                                                                                                                                                                                                                                                                                                                                                                                                                   |
|----------------------------------------------------------------------------------|-----------------------------------------------------------------------------------------------------------------------------------------------------------------------------------------------------------------------------------------------------------------------------------------------------------------------------------------------------------------------------------------------------------------------------------------------------------------------------------------------------------------------------------------------------------------------------------------------------------------------------------------------------------------------------------------------------------------------------------------------------------------------------------------------------------------------------------------------------------------------------------------------------------------------------------------------------------------------------------------------------------------------------------|
| 1<br>2<br>3<br>4<br>5<br>6<br>7                                                  | or omacetaxine or ceftalonin or omapro or synribo or Imatinib or "cgp 57148" or "cgp57148b" or gleevac or gleevec or glivec or glivic or ruvisc or Tamoxifen or ebefen or kessar or tamoplac or tamoxasta or tamoxifene or toremifene or estrimex or fareston or fc1157a or Valrubicin or valstar or valtaxin).tw.                                                                                                                                                                                                                                                                                                                                                                                                                                                                                                                                                                                                                                                                                                                |
| 8<br>9<br>10<br>11<br>12<br>13                                                   | 43 Disulfiram/ or Emetine/ or Clomipramine/ or Loperamide/ or Caspofungin/ or Terconazole/ or Colchicine/ or Promethazine/ or Azelastine/ or Aprepitant/ or Chlorpromazine/ or Icatibant/ or Bepotastine/ or prostacyclin/ or Vapreotide/ or Conivaptan/ or Nitric oxide/ or (Perphenazine or Metformin).hw.                                                                                                                                                                                                                                                                                                                                                                                                                                                                                                                                                                                                                                                                                                                      |
| 14<br>15<br>16<br>17<br>18<br>19<br>20<br>21<br>22<br>23<br>24<br>25<br>26       | 44 (Disulfiram or antabus or Antabuse or esperal or disulfizam or Emetine or Emetin or Clomipramine or Anafranil or anafranilin or anafranyl or clomicalm or hydiphen or Loperamide or immodium or Caspofungin or Cancidas or Terconazole or fungistat or terazol or "r 42470or Colchicine" or colchysat or mitigare or "nsc 757" or Promethazine or allerfen or antiallersin or atosil or fenergan or hiberna or Phenergan or Pipolphen or Prothazine or Romergan or Sayomol or Azelastine or Astelin or "a5610 or afluon" or alerdual or alergodil or allergodrop or allergospray or allespray or allestin or astepro or azedil or azelamed or azelavision or azepe or azeptin or carelastin or corifina or "e 0659" or "e0659" or lasticom or lastin or lastinaz or loxin or oculastin or optivar or pollival or proallergodil or radethacin or radethazin or rhinolast or rinelaz or tebarat or visuzel or vividrin or vivispray or Aprepitant or cinvanti or emend or aprepitant or "1754030" or "mk 0869" or "ono7436").tw. |
| 27<br>28<br>29<br>30<br>31<br>32<br>33<br>34<br>35<br>36<br>37<br>38<br>39<br>40 | 45 (Perphenazine or decentan or etaperazine or ethaperazine or "sch 3940" or thilatazin or tranquisan or trifalon or trilafan or trilafon or trilifan or triliphan or Chlorpromazine or hibernal or contomin or largactil or megaphen or neurazine or plegomazin or promacid or promapar or propaphenin or solidon or sonazine or taroctil or "thor prom" or thorazine or vegetamin or zuledin or Icatibant or firazyr or Metformin or diabetosan or diabex or dianben or diformin or fluamine or flumamine or fortamet or glifage or gliguanid or glucoformin or gluconil or glucophage or glucophage-mite or glucostop or glukophage or glumetza or haurymellin or meguan or merckformin or metforal or metformax or metiguanide or riomet or risidon or siofor or Bepotastine or bepreve or talion or Epoprostenol or prostacyclin or caripul or cycloprostin or epoprostenol or flolan or Vapreotide or docrised or octastatin or Conivaptan or vapisol or "Nitric oxide" or inomax or noxivent).tw.                          |
| 41<br>42                                                                         | 46 (convalescence/ and plasma transfusion/) or (Convalesc* adj2 plasma).tw.                                                                                                                                                                                                                                                                                                                                                                                                                                                                                                                                                                                                                                                                                                                                                                                                                                                                                                                                                       |
| 43<br>44                                                                         | 47 Natural killer cell/ or exp mesenchymal stem cell/                                                                                                                                                                                                                                                                                                                                                                                                                                                                                                                                                                                                                                                                                                                                                                                                                                                                                                                                                                             |
| 45<br>46<br>47                                                                   | 48 ("Recombinant human ACE-2" or "APN0" or "Natural killer cell" or "natural killer cells" or "NK cell" or "NK cells" or mesenchymal).tw.                                                                                                                                                                                                                                                                                                                                                                                                                                                                                                                                                                                                                                                                                                                                                                                                                                                                                         |
| 48<br>49                                                                         | 49 Arbidol/ or Galidesivir/                                                                                                                                                                                                                                                                                                                                                                                                                                                                                                                                                                                                                                                                                                                                                                                                                                                                                                                                                                                                       |
| 50<br>51                                                                         | 50 (arbidol or Galidesivir or "immucillin A bcx4430" or "bcx 4430").tw.                                                                                                                                                                                                                                                                                                                                                                                                                                                                                                                                                                                                                                                                                                                                                                                                                                                                                                                                                           |
| 52<br>53                                                                         | 51 n methyl dextro aspartic acid receptor blocking agent/                                                                                                                                                                                                                                                                                                                                                                                                                                                                                                                                                                                                                                                                                                                                                                                                                                                                                                                                                                         |
| 54<br>55<br>56<br>57                                                             | 52 ("n methyl dextro aspartic acid receptor" or "n methyl d aspartate a" or " NMDA antagonist*" or " NMDA inhibitor*" or " NMDA block*" or " NMDA receptor*").tw.                                                                                                                                                                                                                                                                                                                                                                                                                                                                                                                                                                                                                                                                                                                                                                                                                                                                 |

## Comparative-effectiveness research of COVID-19 treatment: A rapid scoping review

|    |                                                                                                                                                                                                                                                                                                                                    |
|----|------------------------------------------------------------------------------------------------------------------------------------------------------------------------------------------------------------------------------------------------------------------------------------------------------------------------------------|
| 53 | or/7-52                                                                                                                                                                                                                                                                                                                            |
| 54 | 6 and 53                                                                                                                                                                                                                                                                                                                           |
| 55 | exp experimental organism/ or animal tissue/ or animal cell/ or exp animal disease/ or exp carnivore disease/ or exp bird/ or exp experimental animal welfare/ or exp animal husbandry/ or animal behavior/ or exp animal cell culture/ or exp mammalian disease/ or exp mammal/ or exp marine species/ or nonhuman/ or animal.hw. |
| 56 | 55 not human/                                                                                                                                                                                                                                                                                                                      |
| 57 | 54 not 56                                                                                                                                                                                                                                                                                                                          |
| 58 | limit 57 to dd=20210131-20210518                                                                                                                                                                                                                                                                                                   |
| 59 | limit 58 to yr="2021"                                                                                                                                                                                                                                                                                                              |

Search run on July 9, 2021 using the Ovid platform, Embase database. Search was limited by date range, from January 31, 2021 to May 18, 2021, and run in database to update an existing search from May 01, 2020 to January 31, 2021.

### Appendix 3. List of drugs from Health Canada and Public Health Agency of Canada

| Categories                            | Drug names/descriptions                                                                                                                                                                                                                                                                                                                                                                                                                                                                                                                                                                                                                                                                                                                                                                                                                     |
|---------------------------------------|---------------------------------------------------------------------------------------------------------------------------------------------------------------------------------------------------------------------------------------------------------------------------------------------------------------------------------------------------------------------------------------------------------------------------------------------------------------------------------------------------------------------------------------------------------------------------------------------------------------------------------------------------------------------------------------------------------------------------------------------------------------------------------------------------------------------------------------------|
| ACE Inhibitors                        | <ul style="list-style-type: none"> <li>Benazepril (Lotensin), Captopril (Capoten), Cilazapril (Inhibace), Enalapril (Vasotec), Fosinopril (Monopril), Lisinopril (Prinivil, Zestril), Perindopril (Coversyl), Quinapril (Accupril), Ramipril (Altace), Trandolapril (Mavik)</li> </ul>                                                                                                                                                                                                                                                                                                                                                                                                                                                                                                                                                      |
| Angiotensin II Receptor Blocker (ARB) | <ul style="list-style-type: none"> <li>Azilsartan (Edarbi), candesartan (Atacand), eprosartan (Teveten), irbesartan (Avapro), telmisartan (Micardis), valsartan (Diovan, Prexxartan), losartan (Cozaar), olmesartan (Benicar), entresto (sacubitril/valsartan), byvalson (nebivolol/valsartan),</li> </ul>                                                                                                                                                                                                                                                                                                                                                                                                                                                                                                                                  |
| Antibiotics/antiparasitic             | <ul style="list-style-type: none"> <li>Suramin, Carriomycin, Suramin sodium, Colistin, Teicoplanin, Ivermectin, azithromycin</li> </ul>                                                                                                                                                                                                                                                                                                                                                                                                                                                                                                                                                                                                                                                                                                     |
| Antibodies                            | <ul style="list-style-type: none"> <li>SARS-Cov-2 specific neutralizing antibodies</li> <li>Bevicizumab, Ruxolitinib, Tocilizumab, Adalimumab, Camrelizumab, Eculizumab, Mepolizumab, "PD-1 mAb", Tocilizumab, tozumab, abciximab (Reopro), adalimumab (Humira/Amjevita), alefacept (Amevive), alemtuzumab (Campath), basiliximab (Simulect), belimumab (Benlysta), bezlotoxumab (Zinplava), canakinumab (Ilaris), certolizumab (Cimzia), cetuximab (Erbix), daclizumab (Zenapax/Zinbryta), denosumab (Prolia/Xgeva), efalizumab (Raptiva), golimumab (Simponi), inflectra (Remicade), ipilimumab (Yervoy), ixekizumab (Taltz), natalizumab (Tysabri), nivolumab (Opdivo), olaratumab (Lartruvo), omalizumab (Xolair), palivizumab (Synagis), panitumumab (Vectibix), pembrolizumab (Keytruda), rituximab (Rituxan), tocilizumab</li> </ul> |

## Comparative-effectiveness research of COVID-19 treatment: A rapid scoping review

|                             |                                                                                                                                                                                                                                                                                                                                                                                                                                                                                                                                                                                                                                                                                                                                                                                                                                                                                                                                                                                                                                                                                                                                                                                                                                                                                                                                                                             |
|-----------------------------|-----------------------------------------------------------------------------------------------------------------------------------------------------------------------------------------------------------------------------------------------------------------------------------------------------------------------------------------------------------------------------------------------------------------------------------------------------------------------------------------------------------------------------------------------------------------------------------------------------------------------------------------------------------------------------------------------------------------------------------------------------------------------------------------------------------------------------------------------------------------------------------------------------------------------------------------------------------------------------------------------------------------------------------------------------------------------------------------------------------------------------------------------------------------------------------------------------------------------------------------------------------------------------------------------------------------------------------------------------------------------------|
|                             | (Actemra/ RoActemra), trastuzumab (Herceptin), secukinumab (Cosentyx), ustekinumab (Stelara), Meplazumab                                                                                                                                                                                                                                                                                                                                                                                                                                                                                                                                                                                                                                                                                                                                                                                                                                                                                                                                                                                                                                                                                                                                                                                                                                                                    |
| Anticancer/chemotherapy     | • Dasatinib, Epirubicin, Gemcitabine hydrochloride, Homoharringtonine, Imatinib mesylate, Tamoxifen, Toremifene, Valrubicin                                                                                                                                                                                                                                                                                                                                                                                                                                                                                                                                                                                                                                                                                                                                                                                                                                                                                                                                                                                                                                                                                                                                                                                                                                                 |
| Anticoagulants              | • dalteparin, enoxaparin, tinzaparin, fondaparinux heparin, dabigatran, edoxaban, rivaroxaban, apixaban, warfarin, betrixaban, heparin, danaparoid                                                                                                                                                                                                                                                                                                                                                                                                                                                                                                                                                                                                                                                                                                                                                                                                                                                                                                                                                                                                                                                                                                                                                                                                                          |
| Antimalarials               | • Amodiaquine, Basoquin, Camoquin, Flavoquine, Chloroquine, Resochin, Dawaquin, Lariago, Aarlen, Hydroxychloroquine, Hydroxy-chloroquine, Plaquenil, Hydroquin, Axemal, Dolquine, Quensyl, Quinoric, Imiquimod, Aldara, Vyloma., Zyclara, Primaquine, Jasoprim, Malirid, Neo-Quipenyl, Pimaquin, Pmq, Primachina, Primacin, Primaquina, Primaquine, Primaquine, Remaquin, Tafenoquine, Krinfatel, Kozenis, Arakoda, Krintafel, Pamaquine, Plasmochin, Plasmoquine, Plsamaguine, Neo-Quipenyl, Primachin, Dihydroartemisinin, mefloquine, Nitazoxanide, Nitrothiazole                                                                                                                                                                                                                                                                                                                                                                                                                                                                                                                                                                                                                                                                                                                                                                                                        |
| Antiviral – Direct acting   | <ul style="list-style-type: none"> <li>• Protease inhibitors: boceprevir, telaprevir, lopinavir, ritonavir, lopinavir/ritonavir (Kaletra), darunavir/cobicistat (Prezcobix), indinavir (Crixivan), saquinavir (Invirase)</li> <li>• Integrase inhibitors: raltegravir, elvitegravir, dolutegravir</li> <li>• Entry (fusion) inhibitors: maraviroc (celsentri)</li> <li>• Nucleoside reverse transcriptase inhibitors: abacavir, ziagen, emtricitabine, emtriva, lamivudine, epivir, tenofovir (Viread), zidovudine, azidothymidine, retrovir</li> <li>• Nonnucleoside reverse transcriptase inhibitors : , doravirine, pifeltro, efavirenz, sustiva, etravirine, intelence, nevirapine, viramune, rilpivirine, edurant</li> <li>• Acyclic nucleoside phosphonate analogues: cidofovir diphosphates</li> <li>• Acyclic guanosine analogues: acyclovir</li> <li>• Pyrophosphate analogues: foscarnet, fomivirsen</li> <li>• Oligonucleotides</li> <li>• Nucleotide analog inhibitor: sofosbuvir</li> <li>• Nucleoside inhibitor: ribavirin (Ibavir)</li> <li>• Matrix 2 protein inhibitors: amantadine</li> <li>• RNA polymerase inhibitors: Rimantadine</li> <li>• Neuraminidase inhibitors: oseltamivir (Tamiflu), peramivir (Rapivab), zanamivir (Relenza)</li> <li>• Antiretrovirals: ASC09, Azvudine, Danoprevir, Darunavir, Lopinavir, ritonavir, Remdesivir</li> </ul> |
| Antiviral – Other           | • Baloxavir, marboxil, EIDD-2801                                                                                                                                                                                                                                                                                                                                                                                                                                                                                                                                                                                                                                                                                                                                                                                                                                                                                                                                                                                                                                                                                                                                                                                                                                                                                                                                            |
| Antivirals – Broad spectrum | • Favipiravir, Triazavirin, Umifenovir (arbidol hydrochloride), Galidesivir                                                                                                                                                                                                                                                                                                                                                                                                                                                                                                                                                                                                                                                                                                                                                                                                                                                                                                                                                                                                                                                                                                                                                                                                                                                                                                 |

## Comparative-effectiveness research of COVID-19 treatment: A rapid scoping review

|                                                           |                                                                                                                                                                                                                                                                                                                                                                                                                                                                                                                                                                                                                                                                                                                                                                                                                                                                                                                                                                                                                                                                                                                                                  |
|-----------------------------------------------------------|--------------------------------------------------------------------------------------------------------------------------------------------------------------------------------------------------------------------------------------------------------------------------------------------------------------------------------------------------------------------------------------------------------------------------------------------------------------------------------------------------------------------------------------------------------------------------------------------------------------------------------------------------------------------------------------------------------------------------------------------------------------------------------------------------------------------------------------------------------------------------------------------------------------------------------------------------------------------------------------------------------------------------------------------------------------------------------------------------------------------------------------------------|
| Immune support/modulating                                 | <ul style="list-style-type: none"> <li>• Convalescent plasma</li> <li>• Recombinant human ACE-2: APN01</li> <li>• Natural killer (NK) cells</li> <li>• Mesenchymal stem cells</li> <li>• Interferons: Interferon-alpha, Interferon-beta, Interferon-gamma, interferon <math>\beta</math> – 1b (Betaseron/Extavia), interferon beta – 1a (Rebif)</li> <li>• Intravenous Immunoglobulin: Flebogamma DIF; Gamunex; Globulin-N; Globulin N; Intraglobin; Intraglobin F, Gammagard; Gamimmune; Gamimmune, Privigen; Sandoglobulin; Venoglobulin; Venoglobulin-I; Venoglobulin I; Venimmune; Iveegam; Alphaglobin; Endobulin; Gamimmune N; Gamimmune N; Gammonativ</li> </ul>                                                                                                                                                                                                                                                                                                                                                                                                                                                                          |
| Interleukin Inhibitors                                    | <ul style="list-style-type: none"> <li>• Interleukin (IL)-1 Inhibitor: Anakinra</li> <li>• Interleukin (IL)-6 Inhibitors: Sarilumab (Kevzara); Siltuximab</li> <li>• Anti-Tumor necrosis factor-alpha (anti-TNF-alpha)</li> <li>• Anti-Granulocyte-macrophage colony-stimulating factor (anti-GM-CSF)</li> </ul>                                                                                                                                                                                                                                                                                                                                                                                                                                                                                                                                                                                                                                                                                                                                                                                                                                 |
| Kinase Inhibitors                                         | <ul style="list-style-type: none"> <li>• Baricitinib, Acalabrutinib (Calquence), Fedratinib, Ruxolitinib, Jakotinib, Ruxolitinib, Sunitinib, Erlotinib</li> </ul>                                                                                                                                                                                                                                                                                                                                                                                                                                                                                                                                                                                                                                                                                                                                                                                                                                                                                                                                                                                |
| Nonspecific anti-inflammatory and immunosuppressive drugs | <ul style="list-style-type: none"> <li>• Fingolimod Hydrochloride, Leflunomide, Thalidomide, Methylprednisone, Prednisolone, Fluprednisolone, Corticosteroids, Cyclosporin A, Glycyrrhizic Acid/Glycyrrhizic</li> </ul>                                                                                                                                                                                                                                                                                                                                                                                                                                                                                                                                                                                                                                                                                                                                                                                                                                                                                                                          |
| Other                                                     | <ul style="list-style-type: none"> <li>• Disulfiram (acetaldehyde dehydrogenase inhibitor), Emetine (alkaloid emetic), Clomipramine (antidepressant), Loperamide (antidiarrheal), Caspofungin (antifungal), Terconazole (antifungal), Colchicine (anti-gout agent), Promethazine hydrochloride (antihistamine), Azelastine (antihistamine), Aprepitant (anti-nausea/antiemetic), Perphenazine (antipsychotic), Chlorpromazine hydrochloride (antipsychotic), Icatibant (Bradykinin B2 Receptor Antagonists), Metformin (diabetes), Bepotastine (histamine 1 antagonist), Epoprostenol (prostaglandin), Vapreotide (somatostatin), Conivaptan (vasopressin inhibitor), Nitric oxide (vasodilator), Acetylcysteine (prodrug), Potassium citrate (alkalinizer), Dipyridamole (vasodilator), Hydrogen peroxide, Cobicistat (Tybost), Bromhexine (mucolytic), Ebastine (H1 receptor agonist), Pirfenidone (antifibrotic), Polyinosinic-polycytidylic (Poly I-C), rhG-CSF, Thymosin, Tranilast, Ascorbic Acid, Aviptadil (neuropeptide), Ifendopril (NMDA inhibitor), fenretinide (synthetic retinoid), famotidine (H2 receptor antagonist)</li> </ul> |

### Appendix 4. List of included primary studies

1. Abaleke E, Abbas M, Abbasi S, Abbott A, Abdelaziz A, Abdelbadiee S, et al. Azithromycin in patients admitted to hospital with COVID-19 (RECOVERY): a randomised, controlled, open-label, platform trial. *The Lancet*. 2021;397(10274):605-12.
2. Abbaspour Kasgari H, Moradi S, Shabani AM, Babamahmoodi F, Davoudi Badabi AR, Davoudi L, et al. Evaluation of the efficacy of sofosbuvir plus daclatasvir in combination with ribavirin for hospitalized COVID-19 patients with moderate disease



**Comparative-effectiveness research of COVID-19 treatment: A rapid scoping review**

- 1  
2  
3 compared with standard care: a single-centre, randomized controlled trial. *Journal of*  
4 *Antimicrobial Chemotherapy*. 2020;75(11):3373-8.
- 5 3. Abd-Elsalam S, Esmail ES, Khalaf M, Abdo EF, Medhat MA, Abd El Ghafar MS, et  
6 al. Hydroxychloroquine in the treatment of COVID-19: a multicenter randomized  
7 controlled study. *The American Journal of Tropical Medicine and Hygiene*.  
8 2020;103(4):1635.
- 9 4. Abdulrahman A, AlSayed I, AlMadhi M, AlArayed J, Mohammed SJ, Sharif AK,  
10 Alansari K, AlAwadhi AI, AlQahtani M. The Efficacy and Safety of  
11 Hydroxychloroquine in Patients with COVID-19: A Multicenter National  
12 Retrospective Cohort. *Infect Dis Ther*. 2021 Mar;10(1):439-455..
- 13 5. Abolghasemi H, Eshghi P, Cheraghali AM, Fooladi AAI, Moghaddam FB,  
14 Imanizadeh S, et al. Clinical efficacy of convalescent plasma for treatment of  
15 COVID-19 infections: Results of a multicenter clinical study. *Transfusion and*  
16 *Apheresis Science*. 2020;59(5):102875.
- 17 6. Abuzakouk M, Saleh K, Algora M, Nusair A, Alameri J, Alshehhi F, et al.  
18 Convalescent Plasma Efficacy in Life-Threatening COVID-19 Patients Admitted to  
19 the ICU: A Retrospective Cohort Study. *Journal of clinical medicine*.  
20 2021;10(10):2113.
- 21 7. Agarwal A, Mukherjee A, Kumar G, Chatterjee P, Bhatnagar T, Malhotra P, et al.  
22 Page Convalescent plasma in the management of moderate COVID-19 in India: An  
23 open-label parallel-arm phase II multicentre randomized controlled trial (PLACID  
24 Trial).
- 25 8. Agusti A, Guillen E, Ayora A, Anton A, Aguilera C, Vidal X, et al. Efficacy and  
26 safety of hydroxychloroquine in healthcare professionals with mild SARS-CoV-2  
27 infection: Prospective, non-randomized trial. *Enfermedades Infecciosas Y*  
28 *Microbiología Clínica*. 2020.
- 29 9. ah Yoon H, Bartash R, Gendlina I, Rivera J, Nakouzi A, Bortz Iii RH, et al.  
30 Treatment of severe COVID-19 with convalescent plasma in Bronx, NYC. *JCI*  
31 *insight*. 2021;6(4).
- 32 10. Ahmed S, Karim MM, Ross AG, Hossain MS, Clemens JD, Sumiya MK, et al. A  
33 five-day course of ivermectin for the treatment of COVID-19 may reduce the duration  
34 of illness. *International Journal of Infectious Diseases*. 2021;103:214-6.
- 35 11. Alam MM, Mahmud S, Aggarwal S, Fathma S, Al Mahi N, Shibli MS, et al. Clinical  
36 Impact of the Early Use of Monoclonal Antibody LY-CoV555 (Bamlanivimab) on  
37 Mortality and Hospitalization Among Elderly Nursing Home Patients: A Multicenter  
38 Retrospective Study. *Cureus*. 2021;13(5).
- 39 12. Albani F, Fusina F, Giovannini A, Ferretti P, Granato A, Prezioso C, et al. Impact of  
40 azithromycin and/or hydroxychloroquine on hospital mortality in COVID-19. *Journal*  
41 *of clinical medicine*. 2020;9(9):2800.
- 42 13. Albani F, Fusina F, Granato E, Capotosto C, Ceracchi C, Gargaruti R, et al.  
43 Corticosteroid treatment has no effect on hospital mortality in COVID-19 patients.  
44 *Scientific reports*. 2021;11(1):1-6.
- 45 14. Albani F, Sepe L, Fusina F, Prezioso C, Baronio M, Caminiti F, et al.  
46 Thromboprophylaxis with enoxaparin is associated with a lower death rate in patients  
47 hospitalized with SARS-CoV-2 infection. *EClinicalMedicine*.  
48 2020;27:100562.
- 49  
50  
51  
52  
53  
54  
55  
56  
57  
58  
59  
60

**Comparative-effectiveness research of COVID-19 treatment: A rapid scoping review**

15. Albertini L, Soletchnik M, Razurel A, Cohen J, Bidegain F, Fauvelle F, et al. Observational study on off-label use of tocilizumab in patients with severe COVID-19. *European Journal of Hospital Pharmacy*. 2021;28(1):22-7.
16. Allahyari A, Seddigh-Shamsi M, Mahmoudi M, Jamehdar SA, Amini M, Mozdourian M, et al. Efficacy and safety of convalescent plasma therapy in severe COVID-19 patients with acute respiratory distress syndrome. *International Immunopharmacology*. 2021;93:107239.
17. Almas T, Ehtesham M, Khan AW, Khedro T, Hussain S, Kaneez M, et al. Safety and efficacy of low-dose corticosteroids in patients with non-severe Coronavirus disease 2019: A retrospective cohort study. *Cureus*. 2021;13(1).
18. Almazrou SH, Almalki ZS, Alanazi AS, Alqahtani AM, Alghamd SM. Comparing the impact of Hydroxychloroquine based regimens and standard treatment on COVID-19 patient outcomes: A retrospective cohort study. *Saudi Pharmaceutical Journal*. 2020;28(12):1877-82.
19. AlQahtani M, Abdulrahman A, Almadani A, Alali SY, Al Zamrooni AM, Hejab AH, et al. Randomized controlled trial of convalescent plasma therapy against standard therapy in patients with severe COVID-19 disease. *Scientific reports*. 2021;11(1):1-8.
20. AlQahtani M, Abdulrahman A, Almadani A, Alali SY, Al Zamrooni AM, Hejab AH, et al. Randomized controlled trial of convalescent plasma therapy against standard therapy in patients with severe COVID-19 disease. *Scientific reports*. 2021;11(1):1-8.
21. Alsharidah S, Ayed M, Ameen RM, Alhuraish F, Rouheldeen NA, Alshammari FR, et al. COVID-19 convalescent plasma treatment of moderate and severe cases of SARS-CoV-2 infection: a multicenter interventional study. *International Journal of Infectious Diseases*. 2021;103:439-46.
22. AlShehry N, Zaidi SZA, AlAskar A, Al Odayani A, Alotaibi JM, AlSagheir A, et al. Safety and efficacy of convalescent plasma for severe COVID-19: interim report of a multicenter phase II study from Saudi Arabia. *Saudi Journal of Medicine & Medical Sciences*. 2021;9(1):16.
23. AlShehry N, Zaidi SZA, AlAskar A, Al Odayani A, Alotaibi JM, AlSagheir A, et al. Safety and efficacy of convalescent plasma for severe COVID-19: interim report of a multicenter phase II study from Saudi Arabia. *Saudi Journal of Medicine & Medical Sciences*. 2021;9(1):16.
24. Altuntas F, Ata N, Yigenoglu TN, Bascı S, Dal MS, Korkmaz S, et al. Convalescent plasma therapy in patients with COVID-19. *Transfusion and Apheresis Science*. 2021;60(1):102955.
25. Alvarez-Mon M, Asúnsolo Á, Sanz J, Munoz B, Arranz-Caso JA, Novella Mena M, et al. Tocilizumab efficacy in COVID-19 patients is associated with respiratory severity-based stages. 2021.
26. Ammar M, Gu S, Jiang W, Zhao H, Ammar A, Johnson J, et al. 9: Evaluation of Aerosolized Epoprostenol in COVID-19 ARDS Patients. *Critical Care Medicine*. 2021;49(1):5.
27. An MH, Kim MS, Kim B-O, Kang SH, Kimn WJ, Park SK, et al. Treatment response to hydroxychloroquine and antibiotics for mild to moderate COVID-19: a retrospective cohort study from South Korea. *medRxiv*. 2020.
28. Angus DC, Derde L, Al-Beidh F, Annane D, Arabi Y, Beane A, et al. Effect of hydrocortisone on mortality and organ support in patients with severe COVID-19: the

**Comparative-effectiveness research of COVID-19 treatment: A rapid scoping review**

- 1  
2  
3 REMAP-CAP COVID-19 corticosteroid domain randomized clinical trial. *Jama*.  
4 2020;324(13):1317-29.
- 5 29. Annane D, Heming N, Grimaldi-Bensouda L, Frémeaux-Bacchi V, Vigan M, Roux  
6 A-L, et al. Eculizumab as an emergency treatment for adult patients with severe  
7 COVID-19 in the intensive care unit: a proof-of-concept study. *EClinicalMedicine*.  
8 2020;28:100590.
- 9 30. Annie FH, Sirbu C, Frazier KR, Broce M, Lucas Jr BD. Hydroxychloroquine in  
10 Hospitalized Patients with COVID- 19: Real- World Experience Assessing  
11 Mortality. *Pharmacotherapy: The Journal of Human Pharmacology and Drug*  
12 *Therapy*. 2020;40(11):1072-81.
- 13 31. Annweiler C, Hanotte B, de l'Eprevier CG, Sabatier J-M, Lafaie L, Célariet T.  
14 Vitamin D and survival in COVID-19 patients: a quasi-experimental study. *The*  
15 *Journal of steroid biochemistry and molecular biology*. 2020;204:105771.
- 16 32. Antonov V, Ignatova G, Pribytkova O, Sleptsova S, Strebkova E, Khudyakova E, et  
17 al. Experience of olokizumab use in COVID-19 patients. *Terapevticheskii arkhiv*.  
18 2020;92(12):148-54.
- 19 33. Anwar F, Kuriakose B, Khadija S, Hamad M, Satiregun M, Ali L, et al. 219:  
20 Mechanically Ventilated Patients With SARS-CoV-2 Infection: A Single-Institution  
21 Analysis. *Critical Care Medicine*. 2021;49(1):95.
- 22 34. Aomar-Millán IF, Salvatierra J, Torres-Parejo Ú, Faro-Miguez N, Callejas-Rubio JL,  
23 Ceballos-Torres Á, et al. Anakinra after treatment with corticosteroids alone or with  
24 tocilizumab in patients with severe COVID-19 pneumonia and moderate  
25 hyperinflammation. A retrospective cohort study. *Internal and emergency medicine*.  
26 2021;16(4):843-52.
- 27 35. Aomar-Millán IF, Salvatierra J, Torres-Parejo Ú, Nuñez-Nuñez M, Hernández-Quero  
28 J, Anguita-Santos F. Glucocorticoids alone versus tocilizumab alone or  
29 glucocorticoids plus tocilizumab in patients with severe SARS-CoV-2 pneumonia and  
30 mild inflammation. *Medicina Clínica (English Edition)*. 2021.
- 31 36. Arshad S, Kilgore P, Chaudhry ZS, Jacobsen G, Wang DD, Huitsing K, et al.  
32 Treatment with hydroxychloroquine, azithromycin, and combination in patients  
33 hospitalized with COVID-19. *International journal of infectious diseases*.  
34 2020;97:396-403.
- 35 37. Arslan Y, Yilmaz G, Dogan D, Hasirci M, Cetindogan H, Ocal N, et al. The  
36 effectiveness of early anticoagulant treatment in Covid-19 patients. *Phlebology*.  
37 2021;36(5):384-91.
- 38 38. Avendano-Sola C, Ramos-Martinez A, Munez-Rubio E, Ruiz-Antoran B, de Molina  
39 RM, Torres F, et al. Convalescent plasma for COVID-19: a multicenter, randomized  
40 clinical trial. *MedRxiv*. 2020.
- 41 39. Awasthi S, Wagner T, Venkatakrishnan A, Puranik A, Hurchik M, Agarwal V, et al.  
42 Plasma IL-6 levels following corticosteroid therapy as an indicator of ICU length of  
43 stay in critically ill COVID-19 patients. *Cell death discovery*. 2021;7(1):1-15.
- 44 40. Azmy V, Kaman K, Tang D, Zhao H, Cruz CD, Topal JE, et al. Cytokine Profiles  
45 Before and After Immune Modulation in Hospitalized Patients with COVID-19.  
46 *Journal of clinical immunology*. 2021;41(4):738-47.
- 47  
48  
49  
50  
51  
52  
53  
54  
55  
56  
57  
58  
59  
60

**Comparative-effectiveness research of COVID-19 treatment: A rapid scoping review**

- 1
- 2
- 3
- 4 41. Babalola OE, Bode CO, Ajayi AA, Alakaloko FM, Akase IE, Otrofanowei E, et al.
- 5 Ivermectin shows clinical benefits in mild to moderate Covid19 disease: A
- 6 randomised controlled double blind dose response study in Lagos. medRxiv. 2021.
- 7 42. Baghaei P, Dastan F, Marjani M, Moniri A, Abtahian Z, Ghadimi S, et al.
- 8 Combination therapy of IFN $\beta$ 1 with lopinavir–ritonavir, increases oxygenation,
- 9 survival and discharging of sever COVID-19 infected inpatients. International
- 10 Immunopharmacology. 2021;92:107329.
- 11 43. Bahl A, Johnson S, Chen N-W. Timing of corticosteroids impacts mortality in
- 12 hospitalized COVID-19 patients. Internal and emergency medicine. 2021:1-11.
- 13 44. Bajpai M, Maheshwari A, Chabra K, Kale P, Gupta A, Gupta E, et al. Efficacy of
- 14 convalescent plasma therapy compared to fresh frozen plasma in severely ill COVID-
- 15 19 patients: A pilot randomized controlled trial. medRxiv. 2020.
- 16 45. Balcells ME, Rojas L, Le Corre N, Martínez-Valdebenito C, Ceballos ME, Ferrés M,
- 17 et al. Early anti-SARS-CoV-2 convalescent plasma in patients admitted for COVID-
- 18 19: a randomized phase II clinical trial. medRxiv. 2020.
- 19 46. Balcells ME, Rojas L, Le Corre N, Martínez-Valdebenito C, Ceballos ME, Ferrés M,
- 20 et al. Early versus deferred anti-SARS-CoV-2 convalescent plasma in patients
- 21 admitted for COVID-19: A randomized phase II clinical trial. PLoS medicine.
- 22 2021;18(3):e1003415.
- 23 47. Balkhair A, Al-Zakwani I, Al Busaidi M, Al-Khirbash A, Al Mubaihsi S, BaTaher H,
- 24 et al. Anakinra in hospitalized patients with severe COVID-19 pneumonia requiring
- 25 oxygen therapy: results of a prospective, open-label, interventional study.
- 26 International Journal of Infectious Diseases. 2021;103:288-96.
- 27 48. Bandopadhyay P, D’Rozario R, Lahiri A, Sarif J, Ray Y, Paul SR, et al. Nature and
- 28 Dimensions of Systemic Hyperinflammation and its Attenuation by Convalescent
- 29 Plasma in Severe COVID-19. The Journal of infectious diseases. 2021;224(4):565-74.
- 30 49. Bani-Sadr F, Hentzien M, Pascard M, N’Guyen Y, Servettaz A, Andreoletti L, et al.
- 31 Corticosteroid therapy for patients with COVID-19 pneumonia: a before–after study.
- 32 International Journal of Antimicrobial Agents. 2020;56(2):106077.
- 33 50. Batirel A, Demirhan R, Eser N, Körlü E, Tezcan ME. Pulse steroid treatment for
- 34 hospitalized adults with COVID-19. Turkish journal of medical sciences.
- 35 2021;51(5):2248-55.
- 36 51. Beiel J, Tomashek K, Dodd L, Mehta A, Zingman B, Kalil A, et al. Remdesivir for
- 37 the Treatment of COVID-19—Final Report. N Engl J Med. 2020;383:1813-26.
- 38 52. Bernaola N, Mena R, Bernaola A, Carballo C, Lara A, Bielza C, et al. Observational
- 39 study of the efficiency of treatments in patients hospitalized with Covid-19 in Madrid.
- 40 medRxiv. 2020.
- 41 53. Bernardini A, Ciconte G, Negro G, Rondine R, Mecarocci V, Viva T, et al. Assessing
- 42 QT interval in COVID-19 patients: safety of hydroxychloroquine-azithromycin
- 43 combination regimen. International Journal of Cardiology. 2021;324:242-8.
- 44 54. Bhandari S, Rankawat G, Singh A. Tocilizumab: An Effective Therapy for Severely
- 45 and Critically Ill COVID-19 Patients. Indian Journal of Critical Care Medicine: Peer-
- 46 reviewed, Official Publication of Indian Society of Critical Care Medicine.
- 47 2021;25(3):260.
- 48
- 49
- 50
- 51
- 52
- 53
- 54
- 55
- 56
- 57
- 58
- 59
- 60

**Comparative-effectiveness research of COVID-19 treatment: A rapid scoping review**

- 1  
2  
3 55. Bian H, Zheng Z-H, Wei D, Zhang Z, Kang W-Z, Hao C-Q, et al. Meplazumab treats  
4 COVID-19 pneumonia: an open-labelled, concurrent controlled add-on clinical trial.  
5 MedRxiv. 2020.
- 6  
7 56. Bihariesingh R, Bansie R, Froberg J, Ramdhani N, Mangroo R, Bustamente D, et al.  
8 Mortality reduction in ICU-admitted COVID-19 patients in Suriname after treatment  
9 with convalescent plasma acquired via gravity filtration. medRxiv. 2021.
- 10  
11 57. Billett HH, Reyes-Gil M, Szymanski J, Ikemura K, Stahl LR, Lo Y, et al.  
12 Anticoagulation in COVID-19: effect of enoxaparin, heparin, and apixaban on  
13 mortality. *Thrombosis and haemostasis*. 2020;120(12):1691-9.
- 14  
15 58. Bodro M, Cofan F, Ríos J, Herrera S, Linares L, Marcos MA, et al. Use of Anti-  
16 Cytokine Therapy in Kidney Transplant Recipients with COVID-19. *Journal of*  
17 *clinical medicine*. 2021;10(8):1551.
- 18  
19 59. Bukhari SKHS, Asghar A, Perveen N, Hayat A, Mangat SA, Butt KR, et al. Efficacy  
20 of Ivermectin in COVID-19 Patients with Mild to Moderate Disease. medRxiv. 2021.
- 21  
22 60. Burdick H, Lam C, Mataraso S, Siefkas A, Braden G, Dellinger RP, et al. Is Machine  
23 Learning a Better Way to Identify COVID-19 Patients Who Might Benefit from  
24 Hydroxychloroquine Treatment?—The IDENTIFY Trial. *Journal of Clinical*  
25 *Medicine*. 2020;9(12):3834.
- 26  
27 61. Butler CC, Dorward J, Yu L-M, Gbinigie O, Hayward G, Saville BR, et al.  
28 Azithromycin for community treatment of suspected COVID-19 in people at  
29 increased risk of an adverse clinical course in the UK (PRINCIPLE): a randomised,  
30 controlled, open-label, adaptive platform trial. *The Lancet*. 2021;397(10279):1063-  
31 74.
- 32  
33 62. Byttebier G, Belmans L, Alexander M, Saxberg BE, De Spiegeleer B, De Spiegeleer  
34 A, et al. Hospital mortality in COVID-19 patients in Belgium treated with statins,  
35 ACE inhibitors and/or ARBs. *Human Vaccines & Immunotherapeutics*. 2021;1-10.
- 36  
37 63. Cadegiani FA, McCoy J, Wambier CG, Goren A. 5-Alpha-Reductase Inhibitors  
38 Reduce Remission Time of COVID-19: Results From a Randomized Double Blind  
39 Placebo Controlled Interventional Trial in 130 SARS-CoV-2 Positive Men. medRxiv.  
40 2020.
- 41  
42 64. Cadegiani FA, McCoy J, Wambier CG, Vaño-Galván S, Shapiro J, Tosti A, et al.  
43 Proxalutamide significantly accelerates viral clearance and reduces time to clinical  
44 remission in patients with mild to moderate COVID-19: Results from a randomized,  
45 double-blinded, placebo-controlled trial. *Cureus*. 2021;13(2).
- 46  
47 65. Caracciolo M, Correale P, Mangano C, Foti G, Falcone C, Macheda S, et al. Efficacy  
48 and Effect of Inhaled Adenosine Treatment in Hospitalized COVID-19 Patients.  
49 *Frontiers in immunology*. 2021;12:734.
- 50  
51 66. Carallo C, Pugliese F, Vettorato E, Tripolino C, Delle Donne L, Guarrera G, et al.  
52 Higher heparin dosages reduce thromboembolic complications in patients with  
53 COVID-19 pneumonia. *Journal of Investigative Medicine*. 2021;69(4):884-7.
- 54  
55 67. Cardillo G, Viggiano GV, Russo V, Mangiacapra S, Cavalli A, Castaldo G, et al.  
56 Antithrombotic and Anti-Inflammatory Effects of Fondaparinux and Enoxaparin in  
57 Hospitalized COVID-19 Patients: The FONDENOXAVID Study. *Journal of blood*  
58 *medicine*. 2021;12:69.

**Comparative-effectiveness research of COVID-19 treatment: A rapid scoping review**

- 1
  - 2
  - 3
  - 4
  - 5
  - 6
  - 7
  - 8
  - 9
  - 10
  - 11
  - 12
  - 13
  - 14
  - 15
  - 16
  - 17
  - 18
  - 19
  - 20
  - 21
  - 22
  - 23
  - 24
  - 25
  - 26
  - 27
  - 28
  - 29
  - 30
  - 31
  - 32
  - 33
  - 34
  - 35
  - 36
  - 37
  - 38
  - 39
  - 40
  - 41
  - 42
  - 43
  - 44
  - 45
  - 46
  - 47
  - 48
  - 49
  - 50
  - 51
  - 52
  - 53
  - 54
  - 55
  - 56
  - 57
  - 58
  - 59
  - 60
68. Carvalho V, Turon R, Goncalves B, Ceotto V, Kurtz P, Righy C. Effects of tocilizumab in critically ill patients with COVID-19: a quasi-experimental study. medRxiv. 2020.
69. Cegolon L, Einollahi B, Imanizadeh S, Rezapour M, Javanbakht M, Nikpouraghdam M, et al. On whether therapeutic plasma exchange is an effective cure for severe/critical COVID-19 pneumonia. medRxiv. 2021.
70. Chahla RE, Ruiz LM, Mena T, Brepe Y, Terranova P, Ortega ES, et al. IVERMECTIN REPROPOSING FOR COVID-19 TREATMENT OUTPATIENTS IN MILD STAGE IN PRIMARY HEALTH CARE CENTERS. medRxiv. 2021.
71. Chang D, Saleh M, Gabriels J, Ismail H, Goldner B, Willner J, et al. Inpatient use of ambulatory telemetry monitors for COVID-19 patients treated with hydroxychloroquine and/or azithromycin. *Journal of the American College of Cardiology*. 2020;75(23):2992-3.
72. Chen C, Huang J, Cheng Z, Wu J, Chen S, Zhang Y, et al. Favipiravir versus arbidol for COVID-19: a randomized clinical trial. MedRxiv. 2020.
73. Chen C-P, Lin Y-C, Chen T-C, Tseng T-Y, Wong H-L, Kuo C-Y, et al. A multicenter, randomized, open-label, controlled trial to evaluate the efficacy and tolerability of hydroxychloroquine and a retrospective study in adult patients with mild to moderate coronavirus disease 2019 (COVID-19). *PloS one*. 2020;15(12):e0242763.
74. Chen J, Liu D, Liu L, Liu P, Xu Q, Xia L, et al. A pilot study of hydroxychloroquine in treatment of patients with moderate COVID-19. *Journal of Zhejiang University (Medical Science)*. 2020;49(2):215-9.
75. Chen J, Xia L, Liu L, Xu Q, Ling Y, Huang D, et al., editors. Antiviral activity and safety of darunavir/cobicistat for the treatment of COVID-19. *Open forum infectious diseases*; 2020: Oxford University Press US.
76. Chen L, Zhang Z-y, Fu J-g, Feng Z-p, Zhang S-Z, Han Q-Y, et al. Efficacy and safety of chloroquine or hydroxychloroquine in moderate type of COVID-19: a prospective open-label randomized controlled study. MedRxiv. 2020.
77. Chen P, Nirula A, Heller B, Gottlieb RL, Boscia J, Morris J, et al. SARS-CoV-2 neutralizing antibody LY-CoV555 in outpatients with Covid-19. *New England Journal of Medicine*. 2021;384(3):229-37.
78. Chen Q, Song Y, Wang L, Zhang Y, Han L, Liu J, et al. Corticosteroids treatment in severe patients with COVID-19: a propensity score matching study. *Expert review of respiratory medicine*. 2021;15(4):543-52.
79. Chen W, Yao M, Fang Z, Lv X, Deng M, Wu Z. A study on clinical effect of Arbidol combined with adjuvant therapy on COVID- 19. *Journal of medical virology*. 2020;92(11):2702-8.
80. Chen Z, Hu J, Zhang Z, Jiang S, Han S, Yan D, et al. Efficacy of hydroxychloroquine in patients with COVID-19: results of a randomized clinical trial. medrxiv. 2020.
81. Chow JH, Khanna AK, Kethireddy S, Yamane D, Levine A, Jackson AM, et al. Aspirin use is associated with decreased mechanical ventilation, intensive care unit admission, and in-hospital mortality in hospitalized patients with coronavirus disease 2019. *Anesthesia & Analgesia*. 2021;132(4):930-41.

**Comparative-effectiveness research of COVID-19 treatment: A rapid scoping review**

- 1
  - 2
  - 3
  - 4
  - 5
  - 6
  - 7
  - 8
  - 9
  - 10
  - 11
  - 12
  - 13
  - 14
  - 15
  - 16
  - 17
  - 18
  - 19
  - 20
  - 21
  - 22
  - 23
  - 24
  - 25
  - 26
  - 27
  - 28
  - 29
  - 30
  - 31
  - 32
  - 33
  - 34
  - 35
  - 36
  - 37
  - 38
  - 39
  - 40
  - 41
  - 42
  - 43
  - 44
  - 45
  - 46
  - 47
  - 48
  - 49
  - 50
  - 51
  - 52
  - 53
  - 54
  - 55
  - 56
  - 57
  - 58
  - 59
  - 60
82. Chroboczek T, Lacoste M, Wackenheim C, Challan-Belval T, Amar B, Boisson T, et al. Beneficial effect of corticosteroids in severe COVID-19 pneumonia: a propensity score matching analysis. *MedRxiv*. 2020.
83. Consortium WST. Repurposed antiviral drugs for COVID-19—interim WHO SOLIDARITY trial results. *New England journal of medicine*. 2021;384(6):497-511.
84. Consortium WST. Repurposed antiviral drugs for COVID-19—interim WHO SOLIDARITY trial results. *New England journal of medicine*. 2021;384(6):497-511.
85. Corral L, Bahamonde A, delas Revillas FA, Gomez-Barquero J, Abadia-Otero J, Garcia-Ibarbia C, et al. GLUCOCOVID: A controlled trial of methylprednisolone in adults hospitalized with COVID-19 pneumonia. *MedRxiv*. 2020.
86. Courcelle R, Gaudry S, Serck N, Blonz G, Lascarrou J-B, Grimaldi D. Neuromuscular blocking agents (NMBA) for COVID-19 acute respiratory distress syndrome: a multicenter observational study. *Critical Care*. 2020;24(1):1-4.
87. Cremer PC, Abbate A, Hudock K, McWilliams C, Mehta J, Chang SY, et al. Mavrilimumab in patients with severe COVID-19 pneumonia and systemic hyperinflammation (MASH-COVID): an investigator initiated, multicentre, double-blind, randomised, placebo-controlled trial. *The Lancet Rheumatology*. 2021.
88. Cruz LR, Baladrón I, Rittoles A, Díaz PA, Valenzuela C, Santana R, et al. Treatment with an Anti-CK2 Synthetic Peptide Improves Clinical Response in Covid-19 Patients with Pneumonia. A Randomized and Controlled Clinical Trial. *ACS pharmacology & translational science*. 2020;4(1):206-12.
89. Dabbous HM, El-Sayed MH, El Assal G, Elghazaly H, Ebeid FF, Sherief AF, et al. Safety and efficacy of favipiravir versus hydroxychloroquine in management of COVID-19: A randomised controlled trial. *Scientific reports*. 2021;11(1):1-7.
90. de la Calle C, López-Medrano F, Pablos JL, Lora-Tamayo J, Maestro-de la Calle G, Sánchez-Fernández M, et al. Effectiveness of anakinra for tocilizumab-refractory severe COVID-19: A single-centre retrospective comparative study. *International Journal of Infectious Diseases*. 2021;105:319-25.
91. De Luca G, Cavalli G, Campochiaro C, Della Torre E, Angelillo P, Tomelleri A, et al. CO0001 MAVRILIMUMAB IMPROVES OUTCOMES IN SEVERE COVID-19 PNEUMONIA AND SYSTEMIC HYPER-INFLAMMATION. *BMJ Publishing Group Ltd*; 2020.
92. De Rossi N, Scarpazza C, Filippini C, Cordioli C, Rasia S, Mancinelli CR, et al. Early use of low dose tocilizumab in patients with COVID-19: A retrospective cohort study with a complete follow-up. *EClinicalMedicine*. 2020;25:100459.
93. Devereux SG, Giannopoulos G, Vrachatis DA, Siasos GD, Giotaki SG, Gargalianos P, et al. Effect of colchicine vs standard care on cardiac and inflammatory biomarkers and clinical outcomes in patients hospitalized with coronavirus disease 2019: the GRECCO-19 randomized clinical trial. *JAMA network open*. 2020;3(6):e2013136-e.
94. Della-Torre E, Lanzillotta M, Campochiaro C, Cavalli G, De Luca G, Tomelleri A, et al. Respiratory Impairment Predicts Response to IL-1 and IL-6 Blockade in COVID-19 Patients With Severe Pneumonia and Hyper-Inflammation. *Frontiers in Immunology*. 2021;12:1564.
95. Di Castelnuovo A, Costanzo S, Antinori A, Berselli N, Blandi L, Bruno R, et al. Use of hydroxychloroquine in hospitalised COVID-19 patients is associated with reduced

**Comparative-effectiveness research of COVID-19 treatment: A rapid scoping review**

- mortality: Findings from the observational multicentre Italian CORIST study. *European journal of internal medicine*. 2020;82:38-47.
96. Diaz RM, García MAA, Muñoz FJT, Perez LES, Gonzalez MM, Bermejo JAM, et al. Does timing matter on tocilizumab administration? Clinical, analytical and radiological outcomes in COVID-19. *European Journal of Hospital Pharmacy*. 2021.
97. Diaz RM, García MAA, Muñoz FJT, Perez LES, Gonzalez MM, Bermejo JAM, et al. Does timing matter on tocilizumab administration? Clinical, analytical and radiological outcomes in COVID-19. *European Journal of Hospital Pharmacy*. 2021.
98. Duarte M, Pelorosso F, Nicolosi LN, Salgado MV, Vetulli H, Aquieri A, et al. Telmisartan for treatment of Covid-19 patients: An open multicenter randomized clinical trial. *EClinicalMedicine*. 2021;37:100962.
99. Dubee V, Roy P-M, Vielle B, Parot-Schinkel E, Blanchet O, Darsonval A, et al. A placebo-controlled double blind trial of hydroxychloroquine in mild-to-moderate COVID-19. *medRxiv*. 2020.
100. Dupuis C, de Montmollin E, Buetti N, Goldgran-Toledano D, Reignier J, Schwebel C, et al. Impact of early corticosteroids on 60-day mortality in critically ill patients with COVID-19: A multicenter cohort study of the OUTCOMEREA network. *PloS one*. 2021;16(8):e0255644.
101. Eftekhar SP, Kazemi S, Barary M, Javanian M, Ebrahimpour S, Ziaei N. Hydroxychloroquine and azithromycin: As a double edge sword for COVID-19? *medRxiv*. 2021.
102. Faico-Filho KS, Conte DD, Luna LKS, Carvalho JMA, Perosa AHS, Bellei N. Effect of hydroxychloroquine on SARS-CoV-2 viral load in patients with COVID-19. *MedRxiv*. 2020.
103. Fang X, Mei Q, Yang T, Li L, Wang Y, Tong F, et al. Low-dose corticosteroid therapy does not delay viral clearance in patients with COVID-19. *The Journal of infection*. 2020;81(1):147.
104. Feld JJ, Kandel C, Biondi MJ, Kozak RA, Zahoor MA, Lemieux C, et al. Peginterferon lambda for the treatment of outpatients with COVID-19: a phase 2, placebo-controlled randomised trial. *The Lancet Respiratory Medicine*. 2021;9(5):498-510.
105. Ferguson J, Volk S, Vondracek T, Flanigan J, Chernaik A. Empiric therapeutic anticoagulation and mortality in critically ill patients with respiratory failure from SARS- CoV- 2: a retrospective cohort study. *The Journal of Clinical Pharmacology*. 2020;60(11):1411-5.
106. Fernandez-Caballero R, Arroyo VC, Herranz-Muñoz C, Henares-Lopez A. 4CPS-315 Evaluation of the effectiveness of early administration of tocilizumab in patients with COVID-19. *British Medical Journal Publishing Group*; 2021.
107. Fernandez-Cruz A, Ruiz-Antorán B, Munoz-Gomez A, Sancho-Lopez A, Mills-Sanchez P, Centeno-Soto GA, et al. Impact of glucocorticoid treatment in SARS-COV-2 infection mortality: a retrospective controlled cohort study. *medRxiv*. 2020.
108. Firozabad AR, Meybodi ZA, Mousavinasab SR, Sahebnaasagh A, Jelodar MG, Karimzadeh I, et al. Efficacy and safety of Levamisole treatment in clinical presentations of non-hospitalized patients with COVID-19: a double-blind, randomized, controlled trial. *BMC Infectious Diseases*. 2021;21(1):1-8.



**Comparative-effectiveness research of COVID-19 treatment: A rapid scoping review**

109. Fisher MJ, Raymundo LAM, Monteforte M, Taub EM, Go R. Tocilizumab in the treatment of critical COVID-19 pneumonia: a retrospective cohort study of mechanically ventilated patients. *International Journal of Infectious Diseases*. 2021;103:536-9.
110. Flisiak R, Jaroszewicz J, Rogalska M, Łapiński T, Berkan-Kawińska A, Bolewska B, et al. Tocilizumab improves the prognosis of COVID-19 in patients with high IL-6. *Journal of Clinical Medicine*. 2021;10(8):1583.
111. Flisiak R, Zarebska-Michaluk D, Berkan-Kawinska A, Tudrujek-Zdunek M, Rogalska M, Piekarska A, et al. Remdesivir-based therapy improved recovery of patients with COVID-19 in the SARSTer multicentre, real-world study. *medRxiv*. 2020.
112. Frago-so-Saavedra S, Núñez I, Audelo-Cruz BM, Arias-Martínez S, Manzur-Sandoval D, Quintero-Villegas A, et al. Pyridostigmine in adults with severe SARS-CoV-2 infection: the PISCO trial. *medRxiv*. 2021.
113. Franchini M, Glingani C, Morandi M, Corghi G, Cerzosimo S, Beduzzi G, et al. Safety and efficacy of convalescent plasma in elderly COVID-19 patients: The RESCUE trial. *Mayo Clinic Proceedings: Innovations, Quality & Outcomes*. 2021;5(2):403-12.
114. Franzetti M, Forastieri A, Borsa N, Pandolfo A, Molteni C, Borghesi L, et al. IL-1 Receptor Antagonist Anakinra in the Treatment of COVID-19 Acute Respiratory Distress Syndrome: A Retrospective, Observational Study. *The Journal of Immunology*. 2021;206(7):1569-75.
115. Freedberg DE, Conigliaro J, Wang TC, Tracey KJ, Callahan MV, Abrams JA, et al. Famotidine use is associated with improved clinical outcomes in hospitalized COVID-19 patients: a propensity score matched retrospective cohort study. *Gastroenterology*. 2020;159(3):1129-31. e3.
116. Fu W, Liu Y, Liu L, Hu H, Cheng X, Liu P, et al. An open-label, randomized trial of the combination of IFN- $\kappa$  plus TFF2 with standard care in the treatment of patients with moderate COVID-19. *EClinicalMedicine*. 2020;27:100547.
117. Fu W, Liu Y, Xia L, Li M, Song Z, Hu H, et al. A clinical pilot study on the safety and efficacy of aerosol inhalation treatment of IFN- $\kappa$  plus TFF2 in patients with moderate COVID-19. *EClinicalMedicine*. 2020;25:100478.
118. Furtado RH, Berwanger O, Fonseca HA, Corrêa TD, Ferraz LR, Lapa MG, et al. Azithromycin in addition to standard of care versus standard of care alone in the treatment of patients admitted to the hospital with severe COVID-19 in Brazil (COALITION II): a randomised clinical trial. *The Lancet*. 2020;396(10256):959-67.
119. Fusina F, Albani F, Granato E, Meloni A, Rozzini R, Sabatini T, et al. Effect of corticosteroids on mortality in hospitalized COVID-19 patients not receiving invasive mechanical ventilation. *Clinical Pharmacology & Therapeutics*. 2021.
120. Gagliardini R, Cozzi-Lepri A, Mariano A, Taglietti F, Vergori A, Abdeddaim A, et al. No Efficacy of the Combination of Lopinavir/Ritonavir Plus Hydroxychloroquine Versus Standard of Care in Patients Hospitalized With COVID-19: A Non-Randomized Comparison. *Frontiers in Pharmacology*. 2021;12:520.
121. Gallay L, Tran V-T, Perrodeau E, Vignier N, Mahevas M, Bisio F, et al. Fourteen-day survival among older adults with severe infection with severe acute respiratory

**Comparative-effectiveness research of COVID-19 treatment: A rapid scoping review**

- 1  
2  
3 syndrome coronavirus 2 treated with corticosteroid: a cohort study. *Clinical*  
4 *Microbiology and Infection*. 2021.
- 5 122. Gallay L, Tran V-T, Perrodeau E, Vignier N, Mahevas M, Bisio F, et al.  
6 Corticosteroids are associated with increased survival in elderly presenting severe  
7 SARS-Cov2 infection. *medRxiv*. 2020.
- 8 123. Galvez- Romero JL, Palmeros- Rojas O, Real- Ramírez FA, Sánchez- Romero S,  
9 Tome- Maxil R, Ramírez- Sandoval MP, et al. Cyclosporine A plus low- dose  
10 steroid treatment in COVID- 19 improves clinical outcomes in patients with  
11 moderate to severe disease: a pilot study. *Journal of internal medicine*.  
12 2021;289(6):906-20.
- 13 124. Gao D, Xu M, Wang G, Lv J, Ma X, Guo Y, et al. The efficiency and safety of high-  
14 dose vitamin C in patients with COVID-19: A retrospective cohort study. *Aging*  
15 *(Albany NY)*. 2021;13(5):7020.
- 16 125. Gao G, Wang A, Wang S, Qian F, Chen M, Yu F, et al. Brief report: retrospective  
17 evaluation on the efficacy of lopinavir/ritonavir and chloroquine to treat nonsevere  
18 COVID-19 patients. *Journal of acquired immune deficiency syndromes (1999)*.  
19 2020;85(2):239.
- 20 126. Gao X, Ma C, Ma Y, Wang X, Wei J, Feng T, et al. Clinical efficacy and safety of  
21 different antiviral regimens in patients with coronavirus disease 2019. *Zhonghua Wei*  
22 *Zhong Bing Ji Jiu Yi Xue*. 2020:1423-7.
- 23 127. Garibaldi BT, Wang K, Robinson ML, Zeger SL, Bandeen-Roche K, Wang M-C, et  
24 al. Comparison of Time to Clinical Improvement With vs Without Remdesivir  
25 Treatment in Hospitalized Patients With COVID-19. *JAMA network open*.  
26 2021;4(3):e213071-e.
- 27 128. Geleris J, Sun Y, Platt J, Zucker J, Baldwin M, Hripcsak G, et al. Observational study  
28 of hydroxychloroquine in hospitalized patients with Covid-19. *New England Journal*  
29 *of Medicine*. 2020;382(25):2411-8.
- 30 129. Generali D, Bosio G, Malberti F, Cuzzoli A, Testa S, Romanini L, et al.  
31 Canakinumab as treatment for COVID-19-related pneumonia: a prospective case-  
32 control study. *International Journal of Infectious Diseases*. 2021;104:433-40.
- 33 130. Geriak M, Haddad F, Kullar R, Greenwood KL, Habib M, Habib C, et al.  
34 Randomized Prospective Open Label Study Shows No Impact on Clinical Outcome  
35 of Adding Losartan to Hospitalized COVID-19 Patients with Mild Hypoxemia.  
36 *Infectious diseases and therapy*. 2021:1-8.
- 37 131. Ghandehari S, Matusov Y, Pepkowitz S, Stein D, Kaderi T, Narayanan D, et al.  
38 Progesterone in Addition to Standard of Care vs Standard of Care Alone in the  
39 Treatment of Men Hospitalized With Moderate to Severe Covid-19: A Randomized,  
40 Controlled Pilot Trial. *Chest*. 2021.
- 41 132. Gharebaghi N, Nejadrahim R, Mousavi SJ, Sadat-Ebrahimi S-R, Hajizadeh R. The  
42 use of intravenous immunoglobulin gamma for the treatment of severe coronavirus  
43 disease 2019: a randomized placebo-controlled double-blind clinical trial. *BMC*  
44 *infectious diseases*. 2020;20(1):1-8.
- 45 133. Giacomelli A, Pagani G, Ridolfo AL, Oreni L, Conti F, Pezzati L, et al. Early  
46 administration of lopinavir/ritonavir plus hydroxychloroquine does not alter the  
47 clinical course of SARS- CoV- 2 infection: a retrospective cohort study. *Journal of*  
48 *Medical Virology*. 2021;93(3):1421-7.
- 49  
50  
51  
52  
53  
54  
55  
56  
57  
58  
59  
60

**Comparative-effectiveness research of COVID-19 treatment: A rapid scoping review**

134. Gokhale Y, Mehta R, Kulkarni U, Karnik N, Gokhale S, Sundar U, et al. Tocilizumab improves survival in severe COVID-19 pneumonia with persistent hypoxia: a retrospective cohort study with follow-up from Mumbai, India. *BMC Infectious Diseases*. 2021;21(1):1-10.
135. Goldberg E, Zvi HB, Sheena L, Sofer S, Krause I, Sklan EH, et al. A real-life setting evaluation of the effect of remdesivir on viral load in COVID-19 patients admitted to a large tertiary centre in Israel. *Clinical Microbiology and Infection*. 2021;27(6):917.e1-. e4.
136. Goldman JD, Lye DC, Hui DS, Marks KM, Bruno R, Montejano R, et al. Remdesivir for 5 or 10 days in patients with severe Covid-19. *New England Journal of Medicine*. 2020;383(19):1827-37.
137. Gong W-J, Zhou T, Wu S-L, Ye J-L, Xu J-Q, Zeng F, et al. A retrospective analysis of clinical efficacy of ribavirin in adults hospitalized with severe COVID-19. *Journal of Infection and Chemotherapy*. 2021;27(6):876-81.
138. Gong Y, Guan L, Jin Z, Chen S, Xiang G, Gao B. Effects of methylprednisolone use on viral genomic nucleic acid negative conversion and CT imaging lesion absorption in COVID- 19 patients under 50 years old. *Journal of medical virology*. 2020;92(11):2551-5.
139. Gonzalez SE, Regairaz L, Salazar M, Ferrando N, Gonzalez V, Ramos PC, et al. Timing of Convalescent plasma administration and 28-day mortality for COVID-19 pneumonia. *medRxiv*. 2021.
140. Gonzalez-Ochoa AJ, Raffetto JD, Hernández AG, Zavala N, Gutiérrez O, Vargas A, et al. Sulodexide in the treatment of patients with early stages of COVID-19: a randomized controlled trial. *Thrombosis and haemostasis*. 2021.
141. Gonzalez-Ochoa AJ, Raffetto JD, Hernández AG, Zavala N, Gutiérrez O, Vargas A, et al. Sulodexide in the treatment of patients with early stages of COVID-19: a randomized controlled trial. *Thrombosis and haemostasis*. 2021.
142. Gordon AC, Mouncey PR, Al-Beidh F, Rowan KM, Nichol AD, Arabi YM, et al. Interleukin-6 receptor antagonists in critically ill patients with Covid-19. *The New England journal of medicine*. 2021.
143. Gorenstein SA, Castellano ML, Slone ES, Gillette B, Liu H, Alsamarraie C, et al. Hyperbaric oxygen therapy for COVID-19 patients with respiratory distress: treated cases versus propensity-matched controls. *Undersea Hyperb Med*. 2020:405-13.
144. Gottlieb RL, Nirula A, Chen P, Boscia J, Heller B, Morris J, et al. Effect of bamlanivimab as monotherapy or in combination with etesevimab on viral load in patients with mild to moderate COVID-19: a randomized clinical trial. *Jama*. 2021;325(7):632-44.
145. Grimaldi D, Aissaoui N, Blonz G, Carbutti G, Courcelle R, Gaudry S, et al. Characteristics and outcomes of acute respiratory distress syndrome related to COVID-19 in Belgian and French intensive care units according to antiviral strategies: the COVADIS multicentre observational study. *Annals of intensive care*. 2020;10(1):1-11.
146. Group A-TL-CS. A neutralizing monoclonal antibody for hospitalized patients with Covid-19. *New England Journal of Medicine*. 2021;384(10):905-14.
147. Group RC. Effect of hydroxychloroquine in hospitalized patients with Covid-19. *New England Journal of Medicine*. 2020;383(21):2030-40.

**Comparative-effectiveness research of COVID-19 treatment: A rapid scoping review**

148. Group RC. Tocilizumab in patients admitted to hospital with COVID-19 (RECOVERY): a randomised, controlled, open-label, platform trial. *Lancet* (London, England). 2021;397(10285):1637.
149. Group TRC. Dexamethasone in hospitalized patients with Covid-19—preliminary report. *The New England journal of medicine*. 2020.
150. Guaraldi G, Meschiari M, Cozzi-Lepri A, Milic J, Tonelli R, Menozzi M, et al. Tocilizumab in patients with severe COVID-19: a retrospective cohort study. *The Lancet Rheumatology*. 2020;2(8):e474-e84.
151. Gunay S, Caliskan S, Sigirli D, Sahin E. Ventricular repolarization indexes in patients treated with hydroxychloroquine-azithromycin combination for COVID-19. *Bratislavske Lekarske Listy*. 2020;121(11):817-21.
152. Guner R, Hasanoglu I, Kayaaslan B, Aypak A, Akinci E, Bodur H, et al. Comparing ICU admission rates of mild/moderate COVID-19 patients treated with hydroxychloroquine, favipiravir, and hydroxychloroquine plus favipiravir. *Journal of Infection and Public Health*. 2021;14(3):365-70.
153. Gunst JD, Staerke NB, Pahus MH, Kristensen LH, Bodilsen J, Lohse N, et al. Efficacy of the TMPRSS2 inhibitor camostat mesilate in patients hospitalized with Covid-19—a double-blind randomized controlled trial. *EClinicalMedicine*. 2021:100849.
154. Gupta S, Wang W, Hayek SS, Chan L, Mathews KS, Melamed ML, et al. Association between early treatment with tocilizumab and mortality among critically ill patients with COVID-19. *JAMA internal medicine*. 2021;181(1):41-51.
155. Häberle H, Magunia H, Lang P, Gloeckner H, Körner A, Koeppen M, et al. Mesenchymal stem cell therapy for severe COVID-19 ARDS. *Journal of Intensive Care Medicine*. 2021;36(6):681-8.
156. Hacibekiroğlu T, Kalpakci Y, Genç AC, Hacibekiroğlu İ, Sunu C, Saricaoğlu A, et al. Efficacy of convalescent plasma according to blood groups in COVID-19 patients. *Turkish Journal of Medical Sciences*. 2021;51(1):45-8.
157. Halaby R, Cuker A, Yui J, Matthews A, Ishaaya E, Traxler E, et al. Bleeding risk by intensity of anticoagulation in critically ill patients with COVID- 19: A retrospective cohort study. *Journal of Thrombosis and Haemostasis*. 2021.
158. Hanif A, Khan S, Mantri N, Hanif S, Saleh M, Alla Y, et al. Thrombotic complications and anticoagulation in COVID-19 pneumonia: a New York City hospital experience. *Annals of hematology*. 2020;99(10):2323-8.
159. Hao S-r, Yan R, Zhang S-y, Lian J-s, Cai H, Zhang X-l, et al. Interferon- $\alpha$ 2b spray inhalation did not shorten virus shedding time of SARS-CoV-2 in hospitalized patients: a preliminary matched case-control study. *Journal Of Zhejiang University-Science B*. 2020;21(8):628-36.
160. Hasan MJ, Rabbani R, Anam AM, Huq SMR. Additional baricitinib loading dose improves clinical outcome in COVID-19. *Open Medicine*. 2021;16(1):041-6.
161. Hasan MJ, Rabbani R, Anam AM, Huq SMR, Polash MMI, Nessa SST, et al. Impact of high dose of baricitinib in severe COVID-19 pneumonia: a prospective cohort study in Bangladesh. *BMC Infectious Diseases*. 2021;21(1):1-9.
162. Hashim HA, Maulood MF, Rasheed AM, Fatak DF, Kabah KK, Abdulmir AS. Controlled randomized clinical trial on using Ivermectin with Doxycycline for treating COVID-19 patients in Baghdad, Iraq. *MedRxiv*. 2020.

**Comparative-effectiveness research of COVID-19 treatment: A rapid scoping review**

163. Hatzl S, Posch F, Sareban N, Stradner M, Rosskopf K, Reisinger AC, et al. Convalescent plasma therapy and mortality in COVID-19 patients admitted to the ICU: a prospective observational study. *Annals of intensive care*. 2021;11(1):1-11.
164. Hayek ME, Mansour M, Ndetan H, Burkes Q, Corkern R, Dulli A, et al. Anti-Inflammatory treatment of COVID-19 pneumonia with tofacitinib alone or in combination with dexamethasone is safe and possibly superior to dexamethasone as a single agent in a predominantly African American cohort. *Mayo Clinic Proceedings: Innovations, Quality & Outcomes*. 2021.
165. Hazlett C, Wulf DA, Pasaniuc B, Arah OA, Erlandson KM, Montague BT. Credible learning of hydroxychloroquine and dexamethasone effects on COVID-19 mortality outside of randomized trials. *medRxiv*. 2020.
166. Helms J, Severac F, Merdji H, Schenck M, Clere-Jehl R, Baldacini M, et al. Higher anticoagulation targets and risk of thrombotic events in severe COVID-19 patients: bi-center cohort study. *Annals of Intensive Care*. 2021;11(1):1-8.
167. Hermine O, Mariette X, Tharaux P-L, Resche-Rigon M, Porcher R, Ravaud P, et al. Effect of tocilizumab vs usual care in adults hospitalized with COVID-19 and moderate or severe pneumonia: a randomized clinical trial. *JAMA internal medicine*. 2021;181(1):32-40.
168. Hernandez-Cardenas C, Thirion-Romero I, Rodríguez-Llamazares S, Rivera-Martinez NE, Meza-Meneses P, Remigio-Luna A, et al. Hydroxychloroquine for the treatment of severe respiratory infection by covid-19: a randomized controlled trial. *PloS one*. 2021;16(9):e0257238.
169. Herrero FS, Gimeno FP, García PO, Gómez CF, Mochón MDO, Deltoro MG. Methylprednisolone added to tocilizumab reduces mortality in SARS- CoV- 2 pneumonia: An observational study. *Journal of internal medicine*. 2020.
170. Hill JA, Menon MP, Dhanireddy S, Wurfel MM, Green M, Jain R, et al. Tocilizumab in hospitalized patients with COVID- 19: Clinical outcomes, inflammatory marker kinetics, and safety. *Journal of medical virology*. 2021;93(4):2270-80.
171. Hinks TS, Cureton L, Knight R, Wang A, Cane JL, Barber VS, et al. A randomised clinical trial of azithromycin versus standard care in ambulatory COVID-19—the ATOMIC2 trial. 2021.
172. Ho KS, Narasimhan B, Difabrizio L, Rogers L, Bose S, Li L, et al. Impact of corticosteroids in hospitalised COVID-19 patients. *BMJ open respiratory research*. 2021;8(1):e000766.
173. Hoertel N, Sánchez M, Vernet R, Beeker N, Neuraz A, Blanco C, et al. Association between hydroxyzine use and reduced mortality in patients hospitalized for coronavirus disease 2019: results from a multicenter observational study. *medRxiv*. 2020.
174. Hoertel N, Sánchez-Rico M, Gulbins E, Kornhuber J, Carpinteiro A, Abellán M, et al. Association between Psychotropic Medications Functionally Inhibiting Acid Sphingomyelinase and reduced risk of Intubation or Death among Individuals with Mental Disorder and Severe COVID-19: an Observational Study. *medRxiv*. 2021.
175. Hoertel N, Sánchez-Rico M, Gulbins E, Kornhuber J, Carpinteiro A, Lenze EJ, et al. Association between Functional Inhibitors of Acid Sphingomyelinase and Reduced Risk of Intubation or Death in Individuals Hospitalized for Severe COVID-19: results from an observational multicenter study. *medRxiv*. 2021.

**Comparative-effectiveness research of COVID-19 treatment: A rapid scoping review**

176. Hoertel N, Sánchez- Rico M, Vernet R, Beeker N, Neuraz A, Alvarado JM, et al. Dexamethasone use and mortality in hospitalized patients with coronavirus disease 2019: A multicentre retrospective observational study. *British journal of clinical pharmacology*. 2021.
177. Hoertel N, Sánchez-Rico M, Vernet R, Jannot A-S, Neuraz A, Blanco C, et al. Observational study of chlorpromazine in hospitalized patients with COVID-19. *Clinical drug investigation*. 2021;41(3):221-33.
178. Hoertel N, Sánchez-Rico M, Vernet R, Jannot A-S, Neuraz A, Blanco C, et al. Observational study of haloperidol in hospitalized patients with COVID-19. *PloS one*. 2021;16(2):e0247122.
179. Hong G, Patel M, Tusha J, Giri P, Al-Janabi L, Adusumilli RK, et al. Corticosteroid Treatment In Patients With Severe COVID-19 Pneumonia. *Chest*. 2020;158(4):A599.
180. Horby P, Campbell M, Spata E. Colchicine in patients admitted to hospital with COVID-19 (RECOVERY): a randomised, controlled, open-label, platform trial. *medRxiv*. 2021.05. 18.21257267.
181. Horby PW, Campbell M, Staplin N, Spata E, Emberson JR, Pessoa-Amorim G, et al. Tocilizumab in patients admitted to hospital with COVID-19 (RECOVERY): preliminary results of a randomised, controlled, open-label, platform trial. *Medrxiv*. 2021.
182. Horby PW, Estcourt L, Peto L, Emberson JR, Staplin N, Spata E, et al. Convalescent plasma in patients admitted to hospital with COVID-19 (RECOVERY): a randomised, controlled, open-label, platform trial. *medRxiv*. 2021.
183. Horby PW, Mafham M, Bell JL, Linsell L, Staplin N, Emberson J, et al. Lopinavir–ritonavir in patients admitted to hospital with COVID-19 (RECOVERY): a randomised, controlled, open-label, platform trial. *The Lancet*. 2020;396(10259):1345-52.
184. Horby PW, Roddick A, Spata E, Staplin N, Emberson JR, Pessoa-Amorim G, et al. Azithromycin in hospitalised patients with COVID-19 (RECOVERY): a randomised, controlled, open-label, platform trial. *medRxiv*. 2020.
185. Hraiech S, Bourenne J, Kuteifan K, Helms J, Carvelli J, Gainnier M, et al. Lack of viral clearance by the combination of hydroxychloroquine and azithromycin or lopinavir and ritonavir in SARS-CoV-2-related acute respiratory distress syndrome. *Annals of intensive care*. 2020;10:1-3.
186. Hu K, Wang M, Zhao Y, Zhang Y, Wang T, Zheng Z, et al. A small-scale medication of leflunomide as a treatment of COVID-19 in an open-label blank-controlled clinical trial. *Virologica Sinica*. 2020;35(6):725-33.
187. Hu Y, Wang T, Hu Z, Wang X, Zhang Z, Li L, et al. Clinical efficacy of glucocorticoid on the treatment of patients with COVID-19 pneumonia: A single-center experience. *Biomedicine & Pharmacotherapy*. 2020;130:110529.
188. Huang C, Fei L, Li W, Xu W, Xie X, Li Q, et al. Efficacy evaluation of intravenous immunoglobulin in non-severe patients with COVID-19: a retrospective cohort study based on propensity score matching. *International Journal of Infectious Diseases*. 2021;105:525-31.
189. Huang CL, Fei L, Xu W, Li W, Xie XD, Li Q, et al. Efficacy Evaluation of Thymosin Alpha 1 in Non-severe Patients With COVID-19: A Retrospective Cohort Study Based on Propensity Score Matching. *Frontiers in Medicine*. 2021;8:436.

**Comparative-effectiveness research of COVID-19 treatment: A rapid scoping review**

190. Huang E, Isonaka S, Yang H, Salce E, Rosales E, Jordan SC. Tocilizumab treatment in critically ill patients with COVID-19: A retrospective observational study. *International Journal of Infectious Diseases*. 2021;105:245-51.
191. Huang HD, Jneid H, Aziz M, Ravi V, Sharma PS, Larsen T, et al. Safety and effectiveness of hydroxychloroquine and azithromycin combination therapy for treatment of hospitalized patients with COVID-19: a Propensity-Matched study. *Cardiology and therapy*. 2020;9(2):523-34.
192. Huang R, Zhu C, Wang J, Xue L, Li C, Yan X, et al. Corticosteroid therapy is associated with the delay of SARS-CoV-2 clearance in COVID-19 patients. *European journal of pharmacology*. 2020;889:173556.
193. Huang Y-Q, Tang S-Q, Xu X-L, Zeng Y-M, He X-Q, Li Y, et al. No statistically apparent difference in antiviral effectiveness observed among ribavirin plus interferon-alpha, lopinavir/ritonavir plus interferon-alpha, and ribavirin plus lopinavir/ritonavir plus interferon-alpha in patients with mild to moderate coronavirus disease 2019: results of a randomized, open-labeled prospective study. *Frontiers in pharmacology*. 2020;11:1071.
194. Huet T, Beaussier H, Voisin O, Jouveshomme S, Dauriat G, Lazareth I, et al. Anakinra for severe forms of COVID-19: a cohort study. *The Lancet Rheumatology*. 2020;2(7):e393-e400.
195. Hung IF-N, Lung K-C, Tso EY-K, Liu R, Chung TW-H, Chu M-Y, et al. Triple combination of interferon beta-1b, lopinavir-ritonavir, and ribavirin in the treatment of patients admitted to hospital with COVID-19: an open-label, randomised, phase 2 trial. *The Lancet*. 2020;395(10238):1695-704.
196. Husby A, Pottegaard A, Hviid AP. Inhaled corticosteroid use in COVID-19. *medRxiv*. 2020.
197. Iglesias-Julián E, López-Veloso M, de-la-Torre-Ferrera N, Barraza-Vengoechea JC, Delgado-López PD, Colazo-Burlato M, et al. High dose subcutaneous Anakinra to treat acute respiratory distress syndrome secondary to cytokine storm syndrome among severely ill COVID-19 patients. *Journal of Autoimmunity*. 2020;115:102537.
198. Ignatius EH, Wang K, Karaba A, Robinson M, Avery RK, Blair P, et al., editors. Tocilizumab for the treatment of COVID-19 among hospitalized patients: a matched retrospective cohort analysis. *Open Forum Infectious Diseases*; 2021: Oxford University Press US.
199. Ilgın BU, Koyuncu İMA, Kızıltunç E. Effect of triple antimicrobial therapy on electrocardiography parameters in patients with mild-to-moderate coronavirus disease 2019. *Anatolian Journal of Cardiology*. 2021;25(3):184.
200. Ionescu F, Grasso-Knight G, Castillo E, Naeem E, Petrescu I, Imam Z, et al. Therapeutic anticoagulation delays death in COVID-19 patients: cross-sectional analysis of a prospective cohort. *TH Open*. 2020;4(03):e263-e70.
201. Ionescu F, Jaiyesimi I, Petrescu I, Lawler PR, Castillo E, Munoz- Maldonado Y, et al. Association of anticoagulation dose and survival in hospitalized COVID- 19 patients: A retrospective propensity score- weighted analysis. *European journal of haematology*. 2021;106(2):165-74.
202. Ip A, Ahn J, Zhou Y, Goy AH, Hansen E, Pecora AL, et al. Hydroxychloroquine in the treatment of outpatients with mildly symptomatic COVID-19: a multi-center observational study. *BMC infectious diseases*. 2021;21(1):1-12.

**Comparative-effectiveness research of COVID-19 treatment: A rapid scoping review**

203. Ip A, Berry DA, Hansen E, Goy AH, Pecora AL, Sinclair BA, et al. Hydroxychloroquine and tocilizumab therapy in COVID-19 patients—an observational study. *PloS one*. 2020;15(8):e0237693.
204. Ivashchenko AA, Dmitriev KA, Vostokova NV, Azarova VN, Blinow AA, Egorova AN, et al. AVIFAVIR for treatment of patients with moderate COVID-19: interim results of a phase II/III multicenter randomized clinical trial. *medRxiv*. 2020.
205. Jagannathan P, Andrews JR, Bonilla H, Hedlin H, Jacobson KB, Balasubramanian V, et al. Peginterferon Lambda-1a for treatment of outpatients with uncomplicated COVID-19: a randomized placebo-controlled trial. *Nature communications*. 2021;12(1):1-10.
206. Jarrett MP, Licht WB, Bock K, Brown Z, Hirsch JS, Coppa K, et al. Early Experience With Neutralizing Monoclonal Antibody Therapy For COVID-19. *medRxiv*. 2021.
207. Jeronimo CMP, Farias MEL, Val FFA, Sampaio VS, Alexandre MAA, Melo GC, et al. Methylprednisolone as adjunctive therapy for patients hospitalized with COVID-19 (Metcovid): a randomised, double-blind, phase IIb, placebo-controlled trial. 2020.
208. Ji J, Wu M, Zhong L, Liu Z, Wang C, Shao Z, et al. Early, low-dose, short-term methylprednisolone decreased the mortality in critical COVID-19 patients: A multicenter retrospective cohort study. *Journal of Infection*. 2021;82(4):84-123.
209. Ji J, Zhang J, Shao Z, Xie Q, Zhong L, Liu Z. Glucocorticoid therapy does not delay viral clearance in COVID-19 patients. *Critical Care*. 2020;24(1):1-4.
210. Jiang W, Li W, Xiong L, Wu Q, Wu J, He B, et al. Clinical efficacy of convalescent plasma therapy on treating COVID-19 patients: Evidence from matched study and a meta-analysis. *Clinical and translational medicine*. 2020;10(8).
211. Jie X, Hongmei Y, Ping F, Kuikui Z, Bohan Y, Rui M. Beneficial effect of Arbidol in the management of COVID-19 infection. *Aging (Albany NY)*. 2021;13(7):9253.
212. Jiménez-Soto R, Aguilar-Soto M, Demichelis R. The impact of different prophylactic anticoagulation doses on the outcomes of patients with COVID-19. *Blood*. 2020;136:17.
213. Jonmarker S, Hollenberg J, Dahlberg M, Stackelberg O, Litorell J, Everhov ÅH, et al. Dosing of thromboprophylaxis and mortality in critically ill COVID-19 patients. *Critical Care*. 2020;24(1):1-10.
214. Jonmarker S, Hollenberg J, Dahlberg M, Stackelberg O, Litorell J, Everhov ÅH, et al. Dosing of thromboprophylaxis and mortality in critically ill COVID-19 patients. *Critical Care*. 2020;24(1):1-10.
215. Joyner MJ, Senefeld JW, Klassen SA, Mills JR, Johnson PW, Theel ES, et al. Effect of convalescent plasma on mortality among hospitalized patients with COVID-19: initial three-month experience. *medrxiv*. 2020.
216. Kalil AC, Patterson TF, Mehta AK, Tomashek KM, Wolfe CR, Ghazaryan V, et al. Baricitinib plus remdesivir for hospitalized adults with Covid-19. *New England Journal of Medicine*. 2021;384(9):795-807.
217. Kalligeros M, Shehadeh F, Atalla E, Mylona EK, Aung S, Pandita A, et al. Hydroxychloroquine use in hospitalised patients with COVID-19: an observational matched cohort study. *Journal of global antimicrobial resistance*. 2020;22:842-4.
218. Kalligeros M, Tashima KT, Mylona EK, Rybak N, Flanigan TP, Farmakiotis D, et al., editors. Remdesivir use compared with supportive care in hospitalized patients with



**Comparative-effectiveness research of COVID-19 treatment: A rapid scoping review**

- severe COVID-19: a single-center experience. *Open forum infectious diseases*; 2020: Oxford University Press US.
219. Kaminski MA, Sunny S, Balabayova K, Kaur A, Gupta A, Abdallah M, et al. Tocilizumab therapy for COVID-19: A comparison of subcutaneous and intravenous therapies. *International Journal of Infectious Diseases*. 2020;101:59-64.
220. Kamran SM, Mirza Z-e-H, Naseem A, Liaqat J, Fazal I, Alamgir W, et al. Therapeutic plasma exchange for coronavirus disease-2019 triggered cytokine release syndrome; a retrospective propensity matched control study. *PloS one*. 2021;16(1):e0244853.
221. Kamran SM, Moeed HA, Zill-e-Humayun Mirza AN, Azam R, Ullah N, Saeed F, et al. Clearing the fog: Is hydroxychloroquine effective in reducing coronavirus disease-2019 progression? A randomized controlled trial. *Cureus*. 2021;13(3).
222. Karolyi M, Pawelka E, Mader T, Omid S, Kelani H, Ely S, et al. Hydroxychloroquine versus lopinavir/ritonavir in severe COVID-19 patients. *Wiener Klinische Wochenschrift*. 2021;133(7):284-91.
223. Katia F, Myriam DP, Ucciferri C, Auricchio A, Di Nicola M, Marchioni M, et al. Efficacy of canakinumab in mild or severe COVID-19 pneumonia. *Immunity, Inflammation and Disease*. 2021;9(2):399-405.
224. Kaushal S, Khan A, Deatrck K, Ng DK, Snyder A, Shah A, et al. Intravenous Mesenchymal Stem Cells in Extracorporeal Oxygenation Patients with Severe COVID-19 Acute Respiratory Distress Syndrome. *medRxiv*. 2020.
225. Keller MJ, Kitsis EA, Arora S, Chen J-T, Agarwal S, Ross MJ, et al. Effect of systemic glucocorticoids on mortality or mechanical ventilation in patients with COVID-19. *Journal of hospital medicine*. 2020;15(8):489.
226. Kelly M, O'Connor R, Townsend L, Coghlan M, Relihan E, Moriarty M, et al. Clinical outcomes and adverse events in patients hospitalised with COVID-19, treated with off-label hydroxychloroquine and azithromycin. *British journal of clinical pharmacology*. 2021;87(3):1150-4.
227. Kewan T, Covut F, Al-Jaghbeer MJ, Rose L, Gopalakrishna K, Akbik B. Tocilizumab for treatment of patients with severe COVID-19: A retrospective cohort study. *EClinicalMedicine*. 2020;24:100418.
228. Khamis F, Al Naabi H, Al Lawati A, Ambusaidi Z, Al Sharji M, Al Barwani U, et al. Randomized controlled open label trial on the use of favipiravir combined with inhaled interferon beta-1b in hospitalized patients with moderate to severe COVID-19 pneumonia. *International Journal of Infectious Diseases*. 2021;102:538-43.
229. Khamis F, Memish Z, Al Bahrani M, Al Nummani H, Al Raisi D, Al Dowaiqi S, et al. The Role of Convalescent Plasma and Tocilizumab in the Management of COVID-19 Infection: A Cohort of 110 Patients from a Tertiary Care Hospital in Oman. *Journal of Epidemiology and Global Health*. 2021;11(2):216-23.
230. Khoo SH, FitzGerald R, Fletcher T, Ewings S, Jaki T, Lyon R, et al. Optimal dose and safety of molnupiravir in patients with early SARS-CoV-2: a phase 1, dose-escalating, randomised controlled study. *medRxiv*. 2021.
231. Kim EJ, Choi SH, Park JS, Kwon YS, Lee J, Kim Y, et al. Use of darunavir-cobicistat as a treatment option for critically ill patients with SARS-CoV-2 infection. *Yonsei Medical Journal*. 2020;61(9):826.

**Comparative-effectiveness research of COVID-19 treatment: A rapid scoping review**

- 1  
2  
3  
4  
5  
6  
7  
8  
9  
10  
11  
12  
13  
14  
15  
16  
17  
18  
19  
20  
21  
22  
23  
24  
25  
26  
27  
28  
29  
30  
31  
32  
33  
34  
35  
36  
37  
38  
39  
40  
41  
42  
43  
44  
45  
46  
47  
48  
49  
50  
51  
52  
53  
54  
55  
56  
57  
58  
59  
60
232. Kim J-W, Kim EJ, Kwon HH, Jung CY, Kim KC, Choe J-Y, et al. Lopinavir-ritonavir versus hydroxychloroquine for viral clearance and clinical improvement in patients with mild to moderate coronavirus disease 2019. *The Korean journal of internal medicine*. 2021;36(Suppl 1):S253.
233. Kimmig LM, Wu D, Gold M, Pettit NN, Pitrak D, Mueller J, et al. Il-6 inhibition in critically ill COVID-19 patients is associated with increased secondary infections. *Frontiers in medicine*. 2020;7:689.
234. Kimmig LM, Wu D, Gold M, Pettit NN, Pitrak D, Mueller J, et al. Il-6 inhibition in critically ill COVID-19 patients is associated with increased secondary infections. *Frontiers in medicine*. 2020;7:689.
235. Kirkup C, Pawlowski C, Puranik A, Conrad I, O'Horo JC, Gomaa D, et al. Healthcare disparities among anticoagulation therapies for severe COVID-19 patients in the multi-site VIRUS registry. *Journal of medical virology*. 2021;93(7):4303-18.
236. Klapholz M, Pentakota SR, Zertuche J-P, McKenna M, Roque W, Forsberg M, et al., editors. *Matched Cohort Study of Convalescent COVID-19 Plasma Treatment in Severely or Life Threateningly Ill COVID-19 Patients*. Open Forum Infectious Diseases; 2021: Oxford University Press US.
237. Klein MN, Wang EW, Zimand P, Beauchamp H, Donis C, Ward MD, et al. Kinetics of SARS-CoV-2 antibody responses pre-COVID-19 and post-COVID-19 convalescent plasma transfusion in patients with severe respiratory failure: an observational case-control study. *Journal of clinical pathology*. 2021.
238. Klopfenstein T, Zayet S, Lohse A, Balblanc J-C, Badie J, Royer P-Y, et al. Tocilizumab therapy reduced intensive care unit admissions and/or mortality in COVID-19 patients. *Medecine et maladies infectieuses*. 2020;50(5):397-400.
239. Klopfenstein T, Zayet S, Lohse A, Selles P, Zahra H, Toko L, et al. Impact of tocilizumab on mortality and/or invasive mechanical ventilation requirement in a cohort of 206 COVID-19 patients. *International Journal of Infectious Diseases*. 2020;99:491-5.
240. Kocayigit H, Demir G, Karacan A, Süner KÖ, Tomak Y, Yaylacı S, et al. Effects on mortality of early vs late administration of convalescent plasma in the treatment of Covid-19. *Transfusion and Apheresis Science*. 2021:103148.
241. Kocayigit H, Özmen Süner K, Tomak Y, Demir G, Yaylacı S, Dheir H, et al. Observational study of the effects of Favipiravir vs Lopinavir/Ritonavir on clinical outcomes in critically ill patients with COVID-19. *Journal of Clinical Pharmacy and Therapeutics*. 2021;46(2):454-9.
242. Koerper S, Weiss M, Zickler D, Wiesmann T, Zacharowski K, Corman VM, et al. High Dose Convalescent Plasma in COVID-19: Results from the randomized Trial CAPSID. *medRxiv*. 2021.
243. Komissarov A, Molodtsov I, Ivanova O, Maryukhnich E, Kudryavtseva S, Mazus A, et al. High SARS-CoV-2 load in the nasopharynx of patients with a mild form of COVID-19 is associated with clinical deterioration regardless of the hydroxychloroquine administration. *PloS one*. 2021;16(1):e0246396.
244. Kooistra EJ, Waalders NJ, Grondman I, Janssen NA, de Nooijer AH, Netea MG, et al. Anakinra treatment in critically ill COVID-19 patients: a prospective cohort study. *Critical care*. 2020;24(1):1-12.

**Comparative-effectiveness research of COVID-19 treatment: A rapid scoping review**

245. Kumar RN, Wu E-L, Stosor V, Moore WJ, Achenbach C, Ison MG, et al. Real-world experience of bamlanivimab for COVID-19: a case-control study. *Clinical Infectious Diseases: an Official Publication of the Infectious Diseases Society of America*. 2021.
246. Kumar S, De Souza R, Nadkar M, Guleria R, Trikha A, Joshi SR, et al. A two-arm, randomized, controlled, multi-centric, open-label phase-2 study to evaluate the efficacy and safety of Itolizumab in moderate to severe ARDS patients due to COVID-19. *Expert opinion on biological therapy*. 2021;21(5):675-86.
247. Kumari P, Dembra S, Dembra P, Bhawna F, Gul A, Ali B, et al. The role of vitamin C as adjuvant therapy in COVID-19. *Cureus*. 2020;12(11).
248. Kurd R, Ben-Chetrit E, Karameh H, Bar-Meir M. Compassionate Use of Opaganib For Patients with Severe COVID-19. *medRxiv*. 2020.
249. Kyriazopoulou E, Panagopoulos P, Metallidis S, Dalekos GN, Poulakou G, Gatselis N, et al. Anakinra to prevent respiratory failure in COVID-19. *medRxiv*. 2020.
250. Kyriazopoulou E, Poulakou G, Milionis H, Metallidis S, Adamis G, Tsiakos K, et al. Early Anakinra Treatment for COVID-19 Guided by Urokinase Plasminogen Receptor. *medRxiv*. 2021.
251. Lagier J-C, Million M, Gautret P, Colson P, Cortaredona S, Giraud-Gatineau A, et al. Outcomes of 3,737 COVID-19 patients treated with hydroxychloroquine/azithromycin and other regimens in Marseille, France: A retrospective analysis. *Travel medicine and infectious disease*. 2020;36:101791.
252. Lam C, Siefkas A, Zelin NS, Barnes G, Dellinger RP, Vincent J-L, et al. Machine Learning as a Precision-Medicine Approach to Prescribing COVID-19 Pharmacotherapy with Remdesivir or Corticosteroids. *Clinical therapeutics*. 2021.
253. Lamback EB, Oliveira MAd, Haddad AF, Vieira AFM, Ferreira AL, Maia TdS, et al. Hydroxychloroquine with azithromycin in patients hospitalized for mild and moderate COVID-19. *Brazilian Journal of Infectious Diseases*. 2021;25.
254. Lambermont B, Ernst M, Demaret P, Boccar S, Gurdebeke C, Cedric VB, et al. Predictors of Mortality and Effect of Drug Therapies in Mechanically Ventilated Patients With Coronavirus Disease 2019: A Multicenter Cohort Study. *Critical care explorations*. 2020;2(12).
255. Lammers A, Brohet R, Theunissen R, Koster C, Rood R, Verhagen D, et al. Early hydroxychloroquine but not chloroquine use reduces ICU admission in COVID-19 patients. *International Journal of Infectious Diseases*. 2020;101:283-9.
256. Lan X, Shao C, Zeng X, Wu Z, Xu Y. Lopinavir-ritonavir alone or combined with arbidol in the treatment of 73 hospitalized patients with COVID-19: a pilot retrospective study. *MedRxiv*. 2020.
257. Landewé RB, Ramiro S, Mostard RL. COVID-19-induced hyperinflammation, immunosuppression, recovery and survival: how causal inference may help draw robust conclusions. *RMD open*. 2021;7(1):e001638.
258. Langer-Gould A, Smith JB, Gonzales EG, Castillo RD, Figueroa JG, Ramanathan A, et al. Early identification of COVID-19 cytokine storm and treatment with anakinra or tocilizumab. *International Journal of Infectious Diseases*. 2020;99:291-7.
259. Lanzoni G, Linetsky E, Correa D, Messinger Cayetano S, Alvarez RA, Kouroupis D, et al. Umbilical cord mesenchymal stem cells for COVID-19 acute respiratory distress syndrome: A double-blind, phase 1/2a, randomized controlled trial. *Stem cells translational medicine*. 2021;10(5):660-73.

**Comparative-effectiveness research of COVID-19 treatment: A rapid scoping review**

- 1  
2  
3 260. Lattman E, Bhalerao P, ShashiBhushan B, Nargundkar N, Lattmann P, Balaram P.  
4 Randomized, Comparative, Clinical Trial to Evaluate Efficacy and Safety of PNB001  
5 in Moderate COVID-19 Patients. medRxiv. 2021.
- 6  
7 261. Lauriola M, Pani A, Ippoliti G, Mortara A, Milighetti S, Mazen M, et al. Effect of  
8 Combination Therapy of Hydroxychloroquine and Azithromycin on Mortality in  
9 Patients With COVID- 19. *Clinical and translational science*. 2020;13(6):1071-6.
- 10  
11 262. Lavinio A, Ercole A, Battaglini D, Magnoni S, Badenes R, Taccone FS, et al. Safety  
12 profile of enhanced thromboprophylaxis strategies for critically ill COVID-19  
13 patients during the first wave of the pandemic: observational report from 28 European  
14 intensive care units. *Critical Care*. 2021;25(1):1-10.
- 15  
16 263. Lawler PR, Goligher EC, Berger JS, Neal MD, McVerry BJ, Nicolau JC, et al.  
17 Therapeutic anticoagulation in non-critically ill patients with COVID-19. medRxiv.  
18 2021.
- 19  
20 264. Lecronier M, Beurton A, Burrel S, Haudebourg L, Deleris R, Le Marec J, et al.  
21 Comparison of hydroxychloroquine, lopinavir/ritonavir, and standard of care in  
22 critically ill patients with SARS-CoV-2 pneumonia: an opportunistic retrospective  
23 analysis. *Critical Care*. 2020;24(1):1-9.
- 24  
25 265. Lee HW, Park J, Lee J-K, Park TY, Heo EY. The effect of the timing of  
26 dexamethasone administration in patients with COVID-19 pneumonia. *Tuberculosis  
27 and respiratory diseases*. 2021.
- 28  
29 266. Lemos ACB, do Espírito Santo DA, Salvetti MC, Gilio RN, Agra LB, Pazin-Filho A,  
30 et al. Therapeutic versus prophylactic anticoagulation for severe COVID-19: A  
31 randomized phase II clinical trial (HESACOVID). *Thrombosis research*.  
32 2020;196:359-66.
- 33  
34 267. Lenze EJ, Mattar C, Zorumski CF, Stevens A, Schweiger J, Nicol GE, et al.  
35 Flvoxamine vs placebo and clinical deterioration in outpatients with symptomatic  
36 COVID-19: a randomized clinical trial. *Jama*. 2020;324(22):2292-300.
- 37  
38 268. Lescure F-X, Honda H, Fowler RA, Lazar JS, Shi G, Wung P, et al. Sarilumab  
39 treatment of hospitalised patients with severe or critical COVID-19: a multinational,  
40 randomised, adaptive, phase 3, double-blind, placebo-controlled trial. medRxiv. 2021.
- 41  
42 269. Lewis TC, Adhikari S, Tatapudi V, Holub M, Kunichoff D, Troxel AB, et al. A  
43 propensity-matched cohort study of tocilizumab in patients with coronavirus disease  
44 2019. *Critical care explorations*. 2020;2(11).
- 45  
46 270. Li C, Luo F, Liu C, Xiong N, Xu Z, Zhang W, et al. Effect of a genetically  
47 engineered interferon-alpha versus traditional interferon-alpha in the treatment of  
48 moderate-to-severe COVID-19: a randomised clinical trial. *Annals of medicine*.  
49 2021;53(1):391-401.
- 50  
51 271. Li G, Yuan M, Li H, Deng C, Wang Q, Tang Y, et al. Safety and efficacy of  
52 artemisinin-piperazine for treatment of COVID-19: an open-label, non-randomised  
53 and controlled trial. *International journal of antimicrobial agents*. 2021;57(1):106216.
- 54  
55 272. Li H, Xiong N, Li C, Gong Y, Liu L, Yang H, et al. Efficacy of ribavirin and  
56 interferon- $\alpha$  therapy for hospitalized patients with COVID-19: A multicenter,  
57 retrospective cohort study. *International Journal of Infectious Diseases*.  
58 2021;104:641-8.
- 59  
60

**Comparative-effectiveness research of COVID-19 treatment: A rapid scoping review**

- 1  
2  
3 273. Li L, Zhang W, Hu Y, Tong X, Zheng S, Yang J, et al. Effect of convalescent plasma  
4 therapy on time to clinical improvement in patients with severe and life-threatening  
5 COVID-19: a randomized clinical trial. *Jama*. 2020;324(5):460-70.  
6  
7 274. Li M, Gitarts S, Nyabera A, Kondaveeti R, Hammudeh Y, Gonzalez C, et al.  
8 Continuous Infusion Low-Dose Unfractionated Heparin for the Management of  
9 Hypercoagulability Associated With COVID-19. *Journal of Pharmacy Practice*.  
10 2020:0897190020966207.  
11  
12 275. Li M, Yoo EJ, Baram M, McArthur M, Skeehan C, Awsare B, et al. Tocilizumab in  
13 the Management of COVID-19: A Preliminary Report. *The American Journal of the*  
14 *Medical Sciences*. 2021;361(2):208-15.  
15  
16 276. Li M, Yu T, Zhu J, Wang Y, Yang Y, Zhao K, et al. Comparison of the antiviral  
17 effect of Arbidol and Chloroquine in treating COVID-19. *Annals of Palliative*  
18 *Medicine*. 2021;10(3):3307-12.  
19  
20 277. Li P, Lu Z, Li Q, Wang Z, Guo Y, Cai C, et al. Administration Timing and Efficacy  
21 of Tocilizumab in Patients With COVID-19 and Elevated IL-6. *Frontiers in*  
22 *Molecular Biosciences*. 2021;8.  
23  
24 278. Li Q, Li W, Jin Y, Xu W, Huang C, Li L, et al. Efficacy evaluation of early, low-  
25 dose, short-term corticosteroids in adults hospitalized with non-severe COVID-19  
26 pneumonia: a retrospective cohort study. *Infectious diseases and therapy*.  
27 2020;9(4):823-36.  
28  
29 279. Li T, Sun L, Zhang W, Zheng C, Jiang C, Chen M, et al. Bromhexine hydrochloride  
30 tablets for the treatment of moderate COVID- 19: an open- label randomized  
31 controlled pilot study. *Clinical and translational science*. 2020;13(6):1096-102.  
32  
33 280. Li X, Liu L, Yang Y, Yang X, Wang C, Li Y, et al. Gender-associated difference  
34 following COVID-19 virus infection: Implications for thymosin alpha-1 therapy.  
35 *International Immunopharmacology*. 2021;90:107022.  
36  
37 281. Li Y, Li J, Ke J, Jiao N, Zhu L, Shen L, et al. Adverse outcomes associated with  
38 corticosteroid use in critical COVID-19: a retrospective multicenter cohort study.  
39 *Frontiers in medicine*. 2021;8.  
40  
41 282. Li Y, Meng Q, Rao X, Wang B, Zhang X, Dong F, et al. Corticosteroid therapy in  
42 critically ill patients with COVID-19: a multicenter, retrospective study. *Critical*  
43 *Care*. 2020;24(1):1-10.  
44  
45 283. Li Y, Xie Z, Lin W, Cai W, Wen C, Guan Y, et al. Efficacy and safety of  
46 lopinavir/ritonavir or arbidol in adult patients with mild/moderate COVID-19: an  
47 exploratory randomized controlled trial. *Med*. 2020;1(1):105-13. e4.  
48  
49 284. Li Y, Zhou X, Li T, Chan S, Yu Y, Ai J-W, et al. Corticosteroid prevents COVID-19  
50 progression within its therapeutic window: a multicentre, proof-of-concept,  
51 observational study. *Emerging microbes & infections*. 2020;9(1):1869-77.  
52  
53 285. Lian N, Xie H, Lin S, Huang J, Zhao J, Lin Q. Umifenovir treatment is not associated  
54 with improved outcomes in patients with coronavirus disease 2019: a retrospective  
55 study. *Clinical Microbiology and Infection*. 2020;26(7):917-21.  
56  
57 286. Liang M-y, Chen P, He M, Tang J, Li H, He X-l, et al. Corticosteroids treatment of  
58 patients with coronavirus disease 2019: a propensity score matching study. *Current*  
59 *medical science*. 2021;41(1):24-30.  
60  
287. Libster R, Marc GP, Wappner D, Coviello S, Bianchi A, Braem V, et al. Prevention  
of severe COVID-19 in the elderly by early high-titer plasma. *MedRxiv*. 2020.

**Comparative-effectiveness research of COVID-19 treatment: A rapid scoping review**

288. Libster R, Pérez Marc G, Wappner D, Coviello S, Bianchi A, Braem V, et al. Early high-titer plasma therapy to prevent severe Covid-19 in older adults. *New England Journal of Medicine*. 2021;384(7):610-8.
289. Liesenborghs L, Spriet I, Jochmans D, Belmans A, Gyselinck I, Teuwen L-A, et al. Itraconazole for COVID-19: preclinical studies and a proof-of-concept randomized clinical trial. *EBioMedicine*. 2021;66:103288.
290. Lima-Morales R, Méndez-Hernández P, Flores YN, Osorno-Romero P, Sancho-Hernández CR, Cuecuecha-Ruggerio E, et al. Effectiveness of a multidrug therapy consisting of Ivermectin, Azithromycin, Montelukast, and Acetylsalicylic acid to prevent hospitalization and death among ambulatory COVID-19 cases in Tlaxcala, Mexico. *International Journal of Infectious Diseases*. 2021;105:598-605.
291. Liu J, Hua M, Du C, Pu L, Xiang P, Li C, et al. The dual role of anti-viral therapy in the treatment of Coronavirus disease 2019. *European Review for Medical and Pharmacological Sciences*. 2020;24(22):11939-44.
292. Liu J, Zhang S, Dong X, Li Z, Xu Q, Feng H, et al. Corticosteroid treatment in severe COVID-19 patients with acute respiratory distress syndrome. *Journal of Clinical Investigation*. 2020;130(12):6417-28.
293. Liu Q, Huang N, Li A, Zhou Y, Liang L, Song X, et al. Effect of low-dose aspirin on mortality and viral duration of the hospitalized adults with COVID-19. *Medicine*. 2021;100(6).
294. Liu ST, Lin H-M, Baine I, Wajnberg A, Gumprecht JP, Rahman F, et al. Convalescent plasma treatment of severe COVID-19: a propensity score-matched control study. *Nature medicine*. 2020;26(11):1708-13.
295. Liu ST, Lin H-M, Baine I, Wajnberg A, Gumprecht JP, Rahman F, et al. Convalescent plasma treatment of severe COVID-19: a propensity score-matched control study. *Nature medicine*. 2020;26(11):1708-13.
296. Liu Y, Pang Y, Hu Z, Wu M, Wang C, Feng Z, et al. Thymosin alpha 1 (Tα1) reduces the mortality of severe COVID-19 by restoration of lymphocytopenia and reversion of exhausted T cells. *Clinical Infectious Diseases*. 2020.
297. Liu Z, Li X, Fan G, Zhou F, Wang Y, Huang L, et al. Low-to-moderate dose corticosteroids treatment in hospitalized adults with COVID-19. *Clinical Microbiology and Infection*. 2021;27(1):112-7.
298. Lofgren SM, Nicol MR, Bangdiwala AS, Pastick KA, Okafor EC, Skipper CP, et al., editors. Safety of hydroxychloroquine among outpatient clinical trial participants for COVID-19. *Open forum infectious diseases*; 2020: Oxford University Press US.
299. Lofgren SM, Nicol MR, Bangdiwala AS, Pastick KA, Okafor EC, Skipper CP, et al., editors. Safety of hydroxychloroquine among outpatient clinical trial participants for COVID-19. *Open forum infectious diseases*; 2020: Oxford University Press US.
300. Lopardo G, Belloso WH, Nannini E, Colonna M, Sanguineti S, Zylberman V, et al. RBD-specific polyclonal F(ab')<sub>2</sub> fragments of equine antibodies in patients with moderate to severe COVID-19 disease: A randomized, multicenter, double-blind, placebo-controlled, adaptive phase 2/3 clinical trial. *EClinicalMedicine*. 2021;34:100843.
301. Lopes MI, Bonjorno LP, Giannini MC, Amaral NB, Menezes PI, Dib SM, et al. Beneficial effects of colchicine for moderate to severe COVID-19: a randomised, double-blinded, placebo-controlled clinical trial. *RMD open*. 2021;7(1):e001455.

**Comparative-effectiveness research of COVID-19 treatment: A rapid scoping review**

- 1  
2  
3 302. Lopes MIF, Bonjorno LP, Giannini MC, Amaral NB, Benatti MN, Rezek UC, et al. Beneficial effects of colchicine for moderate to severe COVID-19: an interim  
4 analysis of a randomized, double-blinded, placebo controlled clinical trial. MedRxiv.  
5 2020.  
6  
7 303. Lopez A, Duclos G, Pastene B, Bezulier K, Guilhaumou R, Solas C, et al. Effects of  
8 hydroxychloroquine on Covid-19 in intensive care unit patients: preliminary results.  
9 International journal of antimicrobial agents. 2020;56(5):106136.  
10  
11 304. López-Medina E, López P, Hurtado IC, Dávalos DM, Ramirez O, Martínez E, et al.  
12 Effect of ivermectin on time to resolution of symptoms among adults with mild  
13 COVID-19: a randomized clinical trial. Jama. 2021;325(14):1426-35.  
14  
15 305. López-Medrano F, Asín MAP-J, Fernández-Ruiz M, Carretero O, Lalueza A, de la  
16 Calle GM, et al. Combination therapy with tocilizumab and corticosteroids for aged  
17 patients with severe COVID-19 pneumonia: a single-center retrospective study.  
18 International Journal of Infectious Diseases. 2021;105:487-94.  
19  
20 306. López-Medrano F, Asín MAP-J, Fernández-Ruiz M, Carretero O, Lalueza A, de la  
21 Calle GM, et al. Combination therapy with tocilizumab and corticosteroids for aged  
22 patients with severe COVID-19 pneumonia: a single-center retrospective study.  
23 International Journal of Infectious Diseases. 2021;105:487-94.  
24  
25 307. Lotfy SM, Abbas A, Shouman W. Use of Hydroxychloroquine in patients with  
26 COVID-19: a retrospective observational study. Turkish Thoracic Journal.  
27 2021;22(1):62.  
28  
29 308. Lou Y, Liu L, Yao H, Hu X, Su J, Xu K, et al. Clinical outcomes and plasma  
30 concentrations of baloxavir marboxil and favipiravir in COVID-19 patients: an  
31 exploratory randomized, controlled trial. European Journal of Pharmaceutical  
32 Sciences. 2021;157:105631.  
33  
34 309. Lu J, Zhou A, Zhang X, Xu H, Wang X, Ye Q, et al. Safety and efficacy of oral  
35 lopinavir/ritonavir in pediatric patients with coronavirus disease: a nationwide  
36 comparative analysis. Eur Rev Med Pharmacol Sci. 2021;25(1):549-55.  
37  
38 310. Lu X, Chen T, Wang Y, Wang J, Yan F. Adjuvant corticosteroid therapy for critically  
39 ill patients with COVID-19. Critical Care. 2020;24:1-4.  
40  
41 311. Lu Y, Liu F, Tong G, Qiu F, Song P, Wang X, et al. Clinical evidence of an  
42 interferon–glucocorticoid therapeutic synergy in COVID-19. Signal transduction and  
43 targeted therapy. 2021;6(1):1-11.  
44  
45 312. Luis B-M, Miguel M-B, Pedro D-L, David I-P, Itziar A, Ana G-H, et al. Benefits of  
46 early aggressive immunomodulatory therapy (tocilizumab and methylprednisolone) in  
47 COVID-19: single center cohort study of 685 patients. Journal of translational  
48 autoimmunity. 2021:100086.  
49  
50 313. Luis B-M, Miguel M-B, Pedro D-L, David I-P, Itziar A, Ana G-H, et al. Benefits of  
51 early aggressive immunomodulatory therapy (tocilizumab and methylprednisolone) in  
52 COVID-19: single center cohort study of 685 patients. Journal of translational  
53 autoimmunity. 2021:100086.  
54  
55 314. Lyngbakken MN, Berdal J-E, Eskesen A, Kvale D, Olsen IC, Rueegg CS, et al. A  
56 pragmatic randomized controlled trial reports lack of efficacy of hydroxychloroquine  
57 on coronavirus disease 2019 viral kinetics. Nature communications. 2020;11(1):1-6.  
58  
59  
60

**Comparative-effectiveness research of COVID-19 treatment: A rapid scoping review**

- 1  
2  
3 315. Lynn L, Reyes JA, Hawkins K, Panda A, Linville L, Aldhahri W, et al. The effect of  
4 anticoagulation on clinical outcomes in novel Coronavirus (COVID-19) pneumonia  
5 in a US cohort. *Thrombosis research*. 2021;197:65-8.
- 6  
7 316. Ma Q, Qi D, Deng X, Yuan G, Tian W, Cui Y, et al. Corticosteroid therapy for  
8 patients with severe novel Coronavirus disease 2019. *Eur Rev Med Pharmacol Sci*.  
9 2020;8194-201.
- 10  
11 317. Ma Y, Zeng H, Zhan Z, Lu H, Zeng Z, He C, et al. Corticosteroid use in the treatment  
12 of COVID-19: a multicenter retrospective study in hunan, China. *Frontiers in*  
13 *pharmacology*. 2020;11:1198.
- 14  
15 318. Magagnoli J, Narendran S, Pereira F, Cummings TH, Hardin JW, Sutton SS, et al.  
16 Outcomes of hydroxychloroquine usage in United States veterans hospitalized with  
17 Covid-19. *Med*. 2020;1(1):114-27. e3.
- 18  
19 319. Mahajan L, AP Singh G. Clinical outcomes of using remdesivir in patients with  
20 moderate to severe COVID-19: A prospective randomised study. *Indian Journal of*  
21 *Anaesthesia*. 2021;65(Suppl 1):S41.
- 22  
23 320. Mahapatra S, Rattan R, Mohanty C. Convalescent Plasma Therapy in the  
24 management of COVID-19 patients-The newer dimensions. *Transfusion Clinique et*  
25 *Biologique*. 2021.
- 26  
27 321. Mahévas M, Tran V-T, Roumier M, Chabrol A, Paule R, Guillaud C, et al. Clinical  
28 efficacy of hydroxychloroquine in patients with covid-19 pneumonia who require  
29 oxygen: observational comparative study using routine care data. *Bmj*. 2020;369.
- 30  
31 322. Mahmud R, Rahman MM, Alam I, Ahmed KGU, Kabir AH, Sayeed SJB, et al.  
32 Ivermectin in combination with doxycycline for treating COVID-19 symptoms: a  
33 randomized trial. *Journal of International Medical Research*.  
34 2021;49(5):03000605211013550.
- 35  
36 323. Majmundar M, Kansara T, Lenik JM, Park H, Ghosh K, Doshi R, et al. Efficacy of  
37 corticosteroids in non-intensive care unit patients with COVID-19 pneumonia from  
38 the New York Metropolitan region. *PloS one*. 2020;15(9):e0238827.
- 39  
40 324. Maldonado V, Hernandez-Ramírez C, Oliva-Pérez EA, Sánchez-Martínez CO,  
41 Pimentel-González JF, Molina-Sánchez JR, et al. Pentoxifylline decreases serum  
42 LDH levels and increases lymphocyte count in COVID-19 patients: results from an  
43 external pilot study. *International Immunopharmacology*. 2021;90:107209.
- 44  
45 325. Mallat J, Hamed F, Maher Balkis MAM, Mooty M, Malik A, Nusair A, et al.  
46 Hydroxychloroquine is associated with slower viral clearance in clinical COVID-19  
47 patients with mild to moderate disease. *Medicine*. 2020;99(52).
- 48  
49 326. Mancilla-Galindo J, García-Méndez JÓ, Márquez-Sánchez J, Reyes-Casarrubias RE,  
50 Aguirre-Aguilar E, Rocha-González HI, et al. All-cause mortality among patients  
51 treated with repurposed antivirals and antibiotics for COVID-19 in Mexico City: A  
52 real-world observational study. *EXCLI journal*. 2021;20:199.
- 53  
54 327. Manenti L, Maggiore U, Fiaccadori E, Meschi T, Antoni AD, Nouvenne A, et al.  
55 Reduced mortality in COVID-19 patients treated with colchicine: Results from a  
56 retrospective, observational study. *PloS one*. 2021;16(3):e0248276.
- 57  
58 328. Manosuthi W, Jeungsmarn S, Okada P, Suwanvattana P, Wongboot W, Thawornwan  
59 U, et al. Nasopharyngeal SARS-CoV-2 Viral Load Response among COVID-19  
60 Patients Receiving Favipiravir. *Japanese Journal of Infectious Diseases*. 2021:JJID.  
2020.827.



**Comparative-effectiveness research of COVID-19 treatment: A rapid scoping review**

- 1  
2  
3 329. Mansour E, Palma AC, Ulaf RG, Ribeiro LC, Bernardes AF, Nunes TA, et al. Safety  
4 and Outcomes Associated with the Pharmacological Inhibition of the Kinin–  
5 Kallikrein System in Severe COVID-19. *Viruses*. 2021;13(2):309.  
6  
7 330. Marconi VC, Ramanan AV, de Bono S, Kartman CE, Krishnan V, Liao R, et al.  
8 Baricitinib plus standard of care for hospitalized adults with COVID-19. *medRxiv*.  
9 2021.  
10  
11 331. Mareev VY, Orlova YA, Pavlikova E, Matskeplishvili S, Krasnova T, Malahov P, et  
12 al. Steroid pulse-therapy in patients With coronAvirus Pneumonia (COVID-19),  
13 sYstemic inFLammation And Risk of vEnous thRombosis and thromboembolism  
14 (WAYFARER Study). *Kardiologiya*. 2020;60(6):15-29.  
15  
16 332. Mareev VY, Orlova YA, Plisyk A, Pavlikova E, Matskeplishvili S, Akopyan Z, et al.  
17 Results of open-label non-randomized comparative clinical trial: “Bromhexine and  
18 spironolactone for coronavirus infection requiring hospitalization (BISCUIT).  
19 *Kardiologiya*. 2020;60(11):4-15.  
20  
21 333. Martinelli I, Ciavarella A, Abbattista M, Aliberti S, De Zan V, Folli C, et al.  
22 Increasing dosages of low-molecular-weight heparin in hospitalized patients with  
23 Covid-19. *Internal and emergency medicine*. 2021:1-7.  
24  
25 334. Martínez-Sanz J, Muriel A, Ron R, Herrera S, Pérez-Molina JA, Moreno S, et al.  
26 Effects of tocilizumab on mortality in hospitalized patients with COVID-19: a  
27 multicentre cohort study. *Clinical Microbiology and Infection*. 2021;27(2):238-43.  
28  
29 335. Martínez-Sanz J, Muriel A, Ron R, Herrera S, Pérez-Molina JA, Moreno S, et al.  
30 Effects of tocilizumab on mortality in hospitalized patients with COVID-19: a  
31 multicentre cohort study. *Clinical Microbiology and Infection*. 2021;27(2):238-43.  
32  
33 336. Martínez-Urbistondo D, Costa Segovia R, Suárez del Villar Carrero R, Risco Risco  
34 C, Villares Fernández P. Early combination of tocilizumab and corticosteroids: An  
35 upgrade in anti-inflammatory Therapy for severe coronavirus disease (COVID).  
36 *Clinical Infectious Diseases*. 2021;72(9):1682-3.  
37  
38 337. Masiá M, Fernández-González M, Padilla S, Ortega P, García JA, Agulló V, et al.  
39 Impact of interleukin-6 blockade with tocilizumab on SARS-CoV-2 viral kinetics and  
40 antibody responses in patients with COVID-19: A prospective cohort study.  
41 *EBioMedicine*. 2020;60:102999.  
42  
43 338. Mather JF, Seip RL, McKay RG. Impact of famotidine use on clinical outcomes of  
44 hospitalized patients with COVID-19. *The American journal of gastroenterology*.  
45 2020.  
46  
47 339. Mazloomzadeh S, Khaleghparast S, Ghadrdooost B, Mousavizadeh M, Baay MR,  
48 Noohi F, et al. Effect of intermediate-dose vs standard-dose prophylactic  
49 anticoagulation on thrombotic events, extracorporeal membrane oxygenation  
50 treatment, or mortality among patients with COVID-19 admitted to the intensive care  
51 unit: the INSPIRATION randomized clinical trial. *Jama*. 2021;325(16):1620-30.  
52  
53 340. Mehboob R, Ahmad F, Qayyum A, Rana MA, Gilani SA, Tariq MA, et al. Aprepitant  
54 as a combinant with Dexamethasone reduces the inflammation via Neurokinin 1  
55 Receptor Antagonism in severe to critical Covid-19 patients and potentiates  
56 respiratory recovery: A novel therapeutic approach. *medRxiv*. 2020.  
57  
58 341. Mehta M, Purpura LJ, McConville TH, Neidell MJ, Anderson MR, Bernstein EJ, et  
59 al. What about tocilizumab? A retrospective study from a NYC Hospital during the  
60 COVID-19 outbreak. *PloS one*. 2021;16(4):e0249349.

**Comparative-effectiveness research of COVID-19 treatment: A rapid scoping review**

- 1  
2  
3 342. Mehta RM, Bansal S, Bysani S, Kalpakam H. A shorter symptom onset to remdesivir  
4 treatment (SORT) interval is associated with a lower mortality in moderate-to-severe  
5 COVID-19: A real-world analysis. *International Journal of Infectious Diseases*.  
6 2021;106:71-7.  
7  
8 343. Mehta RM, Bansal S, Bysani S, Kalpakam H. A shorter symptom onset to remdesivir  
9 treatment (SORT) interval is associated with a lower mortality in moderate-to-severe  
10 COVID-19: A real-world analysis. *International Journal of Infectious Diseases*.  
11 2021;106:71-7.  
12  
13 344. Meizlish ML, Goshua G, Liu Y, Fine R, Amin K, Chang E, et al. Intermediate- dose  
14 anticoagulation, aspirin, and in- hospital mortality in COVID- 19: A propensity  
15 score- matched analysis. *American journal of hematology*. 2021;96(4):471-9.  
16  
17 345. Memel ZN, Lee JJ, Foulkes AS, Chung RT, Thaweethai T, Bloom PP. Statins Are  
18 Associated with Improved 28-day Mortality in Patients Hospitalized with SARS-  
19 CoV-2 Infection. *medRxiv*. 2021.  
20  
21 346. Memel ZN, Lee JJ, Foulkes AS, Chung RT, Thaweethai T, Bloom PP. Statins Are  
22 Associated with Improved 28-day Mortality in Patients Hospitalized with SARS-  
23 CoV-2 Infection. *medRxiv*. 2021.  
24  
25 347. Méndez-Flores S, Priego-Ranero Á, Azamar-Llamas D, Olvera-Prado H, Rivas-  
26 Redondo KI, Ochoa-Hein E, et al. Effect of polymerized type I collagen in  
27 hyperinflammation of adult outpatients with symptomatic COVID-19: a double blind,  
28 randomised, placebo-controlled clinical trial. *medRxiv*. 2021.  
29  
30 348. Meng F, Xu R, Wang S, Xu Z, Zhang C, Li Y, et al. Human umbilical cord-derived  
31 mesenchymal stem cell therapy in patients with COVID-19: a phase 1 clinical trial.  
32 *Signal transduction and targeted therapy*. 2020;5(1):1-7.  
33  
34 349. Mennuni MG, Renda G, Grisafi L, Rognoni A, Colombo C, Lio V, et al. Clinical  
35 outcome with different doses of low-molecular-weight heparin in patients  
36 hospitalized for COVID-19. *Journal of Thrombosis and Thrombolysis*. 2021:1-9.  
37  
38 350. Menzella F, Fontana M, Salvarani C, Massari M, Ruggiero P, Scelfo C, et al. Efficacy  
39 of tocilizumab in patients with COVID-19 ARDS undergoing noninvasive  
40 ventilation. *Critical Care*. 2020;24(1):1-9.  
41  
42 351. Mercurio NJ, Yen CF, Shim DJ, Maher TR, McCoy CM, Zimetbaum PJ, et al. Risk of  
43 QT interval prolongation associated with use of hydroxychloroquine with or without  
44 concomitant azithromycin among hospitalized patients testing positive for  
45 coronavirus disease 2019 (COVID-19). *JAMA cardiology*. 2020;5(9):1036-41.  
46  
47 352. Mesina FZ, Mangahas CG, Gatchalian EM, Ramos MSA, Torres RP. Use of  
48 Convalescent Plasma Therapy among Hospitalized Coronavirus Disease 2019  
49 (COVID-19) Patients: A Single-Center Experience. *medRxiv*. 2021.  
50  
51 353. Mikulska M, Nicolini LA, Signori A, Di Biagio A, Sepulcri C, Russo C, et al.  
52 Tocilizumab and steroid treatment in patients with COVID-19 pneumonia. *Plos one*.  
53 2020;15(8):e0237831.  
54  
55 354. Miller J, Bruen C, Schnaus M, Zhang J, Ali S, Lind A, et al. Auxora versus standard  
56 of care for the treatment of severe or critical COVID-19 pneumonia: results from a  
57 randomized controlled trial. *Critical Care*. 2020;24(1):1-9.  
58  
59 355. Milzman D, Waud K, Sommers D. 308: Army Medical PPE for COVID-19  
60 Pandemic: Javits, New York City: 1200 Patients, 170 Providers, 0 Cases. *Critical  
Care Medicine*. 2021;49(1):141.

**Comparative-effectiveness research of COVID-19 treatment: A rapid scoping review**

356. Mitjà O, Corbacho-Monné M, Ubals M, Tebe C, Peñafiel J, Tobias A, et al. Hydroxychloroquine for early treatment of adults with mild Covid-19: a randomized-controlled trial. *Clinical Infectious Diseases*. 2020.
357. Moll M, Zon RL, Sylvester KW, Rimsans J, Chen EC, Ghosh AJ, et al. Intermediate versus standard dose heparin prophylaxis in COVID-19 ICU patients: A propensity score-matched analysis. *Thrombosis Research*. 2021;203:57-60.
358. Monedero P, Gea A, Castro P, Candela-Toha AM, Hernández-Sanz ML, Arruti E, et al. Early corticosteroids are associated with lower mortality in critically ill patients with COVID-19: a cohort study. *Critical Care*. 2021;25(1):1-13.
359. Moni M, Madathil T, Sathyapalan D, Menon V, Gutjahr G, Edathadathil F, et al. A Feasibility Trial to Evaluate the Composite Efficacy of Inhaled Nitric Oxide in the Treatment of Covid 19 Pneumonia: Impact on Viral Load and Clinical Outcomes. *medRxiv*. 2021.
360. Monk PD, Marsden RJ, Tear VJ, Brookes J, Batten TN, Mankowski M, et al. Safety and efficacy of inhaled nebulised interferon beta-1a (SNG001) for treatment of SARS-CoV-2 infection: a randomised, double-blind, placebo-controlled, phase 2 trial. *The Lancet Respiratory Medicine*. 2021;9(2):196-206.
361. Monreal E, de la Maza SS, Natera-Villalba E, Beltrán-Corbellini Á, Rodríguez-Jorge F, Fernández-Velasco JI, et al. High versus standard doses of corticosteroids in severe COVID-19: a retrospective cohort study. *European Journal of Clinical Microbiology & Infectious Diseases*. 2021;40(4):761-9.
362. Moreno-García E, Rico V, Albiach L, Agüero D, Ambrosioni J, Bodro M, et al. Tocilizumab reduces the risk of ICU admission and mortality in patients with SARS-CoV-2 infection. *Revista Española de Quimioterapia*. 2021;34(3):238.
363. Moschini L, Loffi M, Regazzoni V, Di Tano G, Gherbesi E, Danzi GB. Effects on QT interval of hydroxychloroquine associated with ritonavir/darunavir or azithromycin in patients with SARS-CoV-2 infection. *Heart and vessels*. 2021;36(1):115-20.
364. Motta JK, Ogunnaiké RO, Shah R, Stroever S, Cedeño HV, Thapa SK, et al. Clinical Outcomes With the Use of Prophylactic Versus Therapeutic Anticoagulation in Coronavirus Disease 2019. *Critical Care Explorations*. 2020;2(12).
365. Mughal MS, Kaur I, Kakadia M, Wang C, Alhashemi R, Salloum R, et al. Is there any additional benefit of multiple doses of tocilizumab in COVID-19 patients? *Cureus*. 2020;12(12).
366. Murai IH, Fernandes AL, Sales LP, Pinto AJ, Goessler KF, Duran CS, et al. Effect of Vitamin D3 Supplementation vs Placebo on Hospital Length of Stay in Patients with Severe COVID-19: A Multicenter, Double-blind, Randomized Controlled Trial. *medRxiv*. 2020.
367. Murai IH, Fernandes AL, Sales LP, Pinto AJ, Goessler KF, Duran CS, et al. Effect of a single high dose of vitamin D3 on hospital length of stay in patients with moderate to severe COVID-19: a randomized clinical trial. *Jama*. 2021;325(11):1053-60.
368. Nadkarni GN, Lala A, Bagiella E, Chang HL, Moreno PR, Pujadas E, et al. Anticoagulation, bleeding, mortality, and pathology in hospitalized patients with COVID-19. *Journal of the American College of Cardiology*. 2020;76(16):1815-26.
369. Narain S, Stefanov DG, Chau AS, Weber AG, Marder G, Kaplan B, et al. Comparative survival analysis of immunomodulatory therapy for COVID-19 'cytokine storm': A retrospective observational cohort study. *Northwell COVID-19 Research*

**Comparative-effectiveness research of COVID-19 treatment: A rapid scoping review**

- Consortium, Comparative Survival Analysis of Immunomodulatory Therapy for COVID-19 'Cytokine Storm': A Retrospective Observational Cohort Study (6/9/2020). 2020.
370. Narain S, Stefanov DG, Chau AS, Weber AG, Marder G, Kaplan B, et al. Comparative survival analysis of immunomodulatory therapy for coronavirus disease 2019 cytokine storm. *Chest*. 2021;159(3):933-48.
371. Negrut N, Codrean A, Hodisan I, Bungau S, Tit DM, Marin R, et al. Efficiency of antiviral treatment in COVID- 19. *Experimental and Therapeutic Medicine*. 2021;21(6):1-7.
372. Nelson BC, Laracy J, Shoucri S, Dietz D, Zucker J, Patel N, et al. Clinical outcomes associated with methylprednisolone in mechanically ventilated patients with COVID-19. *Clinical Infectious Diseases*. 2021;72(9):e367-e72.
373. Niwas R, Garg M, lakshmi Nag V, Bhatia PK, Dutt N, Chauhan N, et al. Clinical outcome, viral response and safety profile of chloroquine in COVID-19 patients—initial experience. *Advances in respiratory medicine*. 2020;88(6):515-9.
374. Nojomi M, Yassin Z, Keyvani H, Makiani MJ, Roham M, Laali A, et al. Effect of Arbidol (Umifenovir) on COVID-19: a randomized controlled trial. *BMC infectious diseases*. 2020;20(1):1-10.
375. Nourian A, Khalili H, Ahmadinejad Z, Kouchak HE, Jafari S, Manshadi SAD, et al. Efficacy and safety of sofosbuvir/ledipasvir in treatment of patients with COVID-19; A randomized clinical trial. *Acta Bio Medica: Atenei Parmensis*. 2020;91(4).
376. Obata R, Maeda T, Do DR, Kuno T. Increased secondary infection in COVID-19 patients treated with steroids in New York City. *Japanese journal of infectious diseases*. 2020;10.
377. O'Donnell MR, Grinsztejn B, Cummings MJ, Justman JE, Lamb MR, Eckhardt CM, et al. A randomized double-blind controlled trial of convalescent plasma in adults with severe COVID-19. *The Journal of Clinical Investigation*. 2021.
378. Okoh AK, Bishburg E, Grinberg S, Nagarakanti S. Tocilizumab use in COVID- 19-associated pneumonia. *Journal of medical virology*. 2021;93(2):1023-8.
379. Okumuş N, Demirtürk N, Çetinkaya RA, Güner R, Avcı İY, Orhan S, et al. Evaluation of the effectiveness and safety of adding ivermectin to treatment in severe COVID-19 patients. *BMC infectious diseases*. 2021;21(1):1-11.
380. Olender SA, Perez KK, Go AS, Balani B, Price-Haywood EG, Shah NS, et al. Remdesivir for severe COVID-19 versus a cohort receiving standard of care. *Clinical Infectious Diseases*. 2020.
381. Omrani AS, Pathan SA, Thomas SA, Harris TR, Coyle PV, Thomas CE, et al. Randomized double-blinded placebo-controlled trial of hydroxychloroquine with or without azithromycin for virologic cure of non-severe Covid-19. *EClinicalMedicine*. 2020;29:100645.
382. Omrani AS, Zaqout A, Baiou A, Daghfal J, Elkum N, Alattar RA, et al. Convalescent plasma for the treatment of patients with severe coronavirus disease 2019: a preliminary report. *Journal of Medical Virology*. 2021;93(3):1678-86.
383. Ong SWX, Tan WYT, Chan YH, Fong SW, Renia L, Ng LF, et al. Safety and potential efficacy of cyclooxygenase- 2 inhibitors in coronavirus disease 2019. *Clinical & translational immunology*. 2020;9(7):e1159.

**Comparative-effectiveness research of COVID-19 treatment: A rapid scoping review**

- 1  
2  
3 384. Ooi ST, Parthasarathy P, Lin Y, Nallakaruppan V, Ng S, Tan TC, et al. Adjunctive  
4 Corticosteroids for COVID-19: A Retrospective Cohort Study. medRxiv. 2020.  
5 385. Ooi ST, Parthasarathy P, Lin Y, Nallakaruppan VDO, Ng S, Tan TC, et al., editors.  
6 Antivirals With Adjunctive Corticosteroids Prevent Clinical Progression of Early  
7 Coronavirus 2019 Pneumonia: A Retrospective Cohort Study. Open Forum Infectious  
8 Diseases; 2020: Oxford University Press US.  
9 386. Owen RR, Qizilbash N, Diaz SV, Vazquez JMC, Pocock SJ. Making sense of non-  
10 randomized comparative treatment studies in times of Covid-19: A case study of  
11 tocilizumab. medRxiv. 2021.  
12 387. Paccoud O, Tubach F, Baptiste A, Bleibtreu A, Hajage D, Monsel G, et al.  
13 Compassionate use of hydroxychloroquine in clinical practice for patients with mild  
14 to severe Covid-19 in a French university hospital. Clinical Infectious Diseases. 2020.  
15 388. Padilla R, Arquette J, Mai Y, Singh G, Galang K, Liang E. Clinical Outcomes of  
16 COVID-19 Patients Treated with Convalescent Plasma or Remdesivir Alone and in  
17 Combination at a Community Hospital in California's Central Valley. Journal of  
18 Pharmacy & Pharmaceutical Sciences. 2021;24:210-9.  
19 389. Padmanabhan U, Mukherjee S, Borse R, Joshi S, Deshmukh R. Phase II Clinical trial  
20 for Evaluation of BCG as potential therapy for COVID-19. medRxiv. 2020.  
21 390. Panagopoulos P, Petrakis V, Panopoulou M, Trypsianis G, Penlioglou T,  
22 Pnevmatikos I, et al. Lopinavir/ritonavir as a third agent in the antiviral regimen for  
23 SARS-CoV-2 infection. Journal of Chemotherapy. 2021;33(3):193-7.  
24 391. Pandit A, Bhalani N, Bhushan BS, Koradia P, Gargiya S, Bhomia V, et al. Efficacy  
25 and safety of pegylated interferon alfa-2b in moderate COVID-19: A phase II,  
26 randomized, controlled, open-label study. International Journal of Infectious  
27 Diseases. 2021;105:516-21.  
28 392. Pang J, Xu F, Aondio G, Li Y, Fumagalli A, Lu M, et al. Efficacy and tolerability of  
29 bevacizumab in patients with severe Covid-19. Nature communications.  
30 2021;12(1):1-10.  
31 393. Paolisso P, Bergamaschi L, D'Angelo EC, Donati F, Giannella M, Tedeschi S, et al.  
32 Preliminary experience with low molecular weight heparin strategy in COVID-19  
33 patients. Frontiers in pharmacology. 2020;11:1124.  
34 394. Papamanoli A, Yoo J, Grewal P, Predun W, Hotelling J, Jacob R, et al. High- dose  
35 methylprednisolone in nonintubated patients with severe COVID- 19 pneumonia.  
36 European journal of clinical investigation. 2021;51(2):e13458.  
37 395. Pappa V, Bouchla A, Terpos E, Thomopoulos TP, Rosati M, Stellas D, et al. A Phase  
38 II Study on the Use of Convalescent Plasma for the Treatment of Severe COVID-19-  
39 A Propensity Score-Matched Control Analysis. Microorganisms. 2021;9(4):806.  
40 396. Pareja JFP, García-Caballero R, Rangel LS, Vázquez-Ronda MA, Franco SR,  
41 Jiménez GN, et al. Effectiveness of glucocorticoids in patients hospitalized for severe  
42 SARS-CoV-2 pneumonia. Medicina Clínica (English Edition). 2021;156(5):221-8.  
43 397. Pasquini Z, Montalti R, Temperoni C, Canovari B, Mancini M, Tempesta M, et al.  
44 Effectiveness of remdesivir in patients with COVID-19 under mechanical ventilation  
45 in an Italian ICU. Journal of Antimicrobial Chemotherapy. 2020;75(11):3359-65.  
46 398. Patel J, Beishuizen A, Ruiz XB, Boughanmi H, Cahn A, Criner GJ, et al. A  
47 Randomized Trial of Otilimab in Severe COVID-19 Pneumonia (OSCAR). medRxiv.  
48 2021.  
49  
50  
51  
52  
53  
54  
55  
56  
57  
58  
59  
60

**Comparative-effectiveness research of COVID-19 treatment: A rapid scoping review**

- 1  
2  
3 399. Patel NG, Bhasin A, Feinglass JM, Belknap SM, Angarone MP, Cohen ER, et al. Clinical outcomes of hospitalized patients with COVID-19 on therapeutic  
4 anticoagulants. medRxiv. 2020.  
5  
6 400. Patel O, Chinni V, El- Khoury J, Perera M, Neto AS, McDonald C, et al. A pilot  
7 double- blind safety and feasibility randomized controlled trial of high- dose  
8 intravenous zinc in hospitalized COVID- 19 patients. Journal of medical virology.  
9 2021;93(5):3261-7.  
10  
11 401. Pavoni V, Gianesello L, Pazzi M, Stera C, Meconi T, Frigieri FC. Venous  
12 thromboembolism and bleeding in critically ill COVID-19 patients treated with  
13 higher than standard low molecular weight heparin doses and aspirin: a call to action.  
14 Thrombosis research. 2020;196:313-7.  
15  
16 402. Pawlowski C, Venkatakrishnan A, Kirkup C, Berner G, Puranik A, O'Horo JC, et al.  
17 Enoxaparin is associated with lower rates of mortality than unfractionated Heparin in  
18 hospitalized COVID-19 patients. EClinicalMedicine. 2021;33:100774.  
19  
20 403. Pedretti Z, Powell B, Hedrick T, Murray B, Fischer W. 197: Characterization of  
21 Cytokine Expression in Critically Ill Patients With COVID-19. Critical Care  
22 Medicine. 2021;49(1):84.  
23  
24 404. Pereda R, González D, Rivero HB, Rivero JC, Pérez A, Lopez LDR, et al.  
25 Therapeutic effectiveness of interferon alpha 2b treatment for COVID-19 patient  
26 recovery. Journal of Interferon & Cytokine Research. 2020;40(12):578-88.  
27  
28 405. Pereda R, González D, Rivero HB, Rivero JC, Pérez A, López LDR, et al.  
29 Therapeutic effectiveness of interferon- $\alpha$ 2b against COVID-19: the Cuban  
30 experience. Journal of Interferon & Cytokine Research. 2020;40(9):438-42.  
31  
32 406. Pereira MR, Aversa MM, Farr MA, Miko BA, Aaron JG, Mohan S, et al.  
33 Tocilizumab for severe COVID- 19 in solid organ transplant recipients: a matched  
34 cohort study. American Journal of Transplantation. 2020;20(11):3198-205.  
35  
36 407. Perlin DS, Neil GA, Anderson C, Zafir-Lavie I, Roadcap L, Raines S, et al. CERC-  
37 002, a human anti-LIGHT mAb reduces respiratory failure and death in hospitalized  
38 COVID-19 ARDS patients. medRxiv. 2021.  
39  
40 408. Pesavento R, Ceccato D, Pasquetto G, Monticelli J, Leone L, Frigo A, et al. The  
41 hazard of (sub) therapeutic doses of anticoagulants in non- critically ill patients with  
42 Covid- 19: the Padua province experience. Journal of Thrombosis and Haemostasis.  
43 2020;18(10):2629-35.  
44  
45 409. Peters EJ, Collard D, Van Assen S, Beudel M, Bomers MK, Buijs J, et al. Outcomes  
46 of persons with coronavirus disease 2019 in hospitals with and without standard  
47 treatment with (hydroxy) chloroquine. Clinical Microbiology and Infection.  
48 2021;27(2):264-8.  
49  
50 410. Petrak RM, Skorodin NC, Van Hise NW, Fliegelman RM, Pinsky J, Didwania V, et  
51 al. Tocilizumab as a therapeutic agent for critically ill patients infected with SARS-  
52 CoV- 2. Clinical and Translational Science. 2020.  
53  
54 411. Pettit NN, Nguyen CT, Mutlu GM, Wu D, Kimmig L, Pitrak D, et al. Late onset  
55 infectious complications and safety of tocilizumab in the management of COVID-  
56 19. Journal of Medical Virology. 2021;93(3):1459-64.  
57  
58 412. Piniella-Ruiz E, Bellver-Álvarez MT, Mestre-Gómez B, Escolano-Fernández B,  
59 Vinat-Prado S, Cabezas-Olea R, et al. Impact of systemic corticosteroids on mortality

**Comparative-effectiveness research of COVID-19 treatment: A rapid scoping review**

- in older adults with critical COVID-19 pneumonia. *The Journals of Gerontology: Series A*. 2021.
413. Pisano E, Bonino C, Arena A, Montanari G, Cerbone F, Umbrello M, et al. Effect of different corticosteroid regimens on the outcome of patients with severe COVID-19-related acute respiratory failure. *Intensive Care Medicine Experimental*. 2020.
414. Piva S, DiBlasi RM, Slee AE, Jobe AH, Roccaro AM, Filippini M, et al. Surfactant therapy for COVID-19 related ARDS: a retrospective case-control pilot study. *Respiratory research*. 2021;22(1):1-8.
415. Plaze M, Attali D, Petit AC, Blatzer M, Simon-Loriere E, Vinckier F, Cachia A, Chrétien F, Gaillard R. Repurposing chlorpromazine to treat COVID-19: The reCoVery study. *Encephale*. 2020;46(3):169-172.
416. Pontali E, Volpi S, Signori A, Antonucci G, Castellaneta M, Buzzi D, et al. Efficacy of early anti-inflammatory treatment with high doses of intravenous anakinra with or without glucocorticoids in patients with severe COVID-19 pneumonia. *Journal of Allergy and Clinical Immunology*. 2021;147(4):1217-25.
417. Potere N, Di Nisio M, Cibelli D, Scurti R, Frattari A, Porreca E, et al. Interleukin-6 receptor blockade with subcutaneous tocilizumab in severe COVID-19 pneumonia and hyperinflammation: a case-control study. *Annals of the Rheumatic Diseases*. 2021;80(2):1-2.
418. Potere N, Di Nisio M, Rizzo G, La Vella M, Polilli E, Agostinone A, et al. Low-dose subcutaneous tocilizumab to prevent disease progression in patients with moderate COVID-19 pneumonia and hyperinflammation. *International Journal of Infectious Diseases*. 2020;100:421-4.
419. Pott-Junior H, Paoliello MMB, Miguel AdQC, da Cunha AF, de Melo Freire CC, Neves FF, et al. Use of ivermectin in the treatment of Covid-19: A pilot trial. *Toxicology Reports*. 2021;8:505-10.
420. Pouladzadeh M, Safdarian M, Eshghi P, Abolghasemi H, Sheibani B, Choghakabodi PM, et al. A randomized clinical trial evaluating the immunomodulatory effect of convalescent plasma on COVID-19-related cytokine storm. *Internal and emergency medicine*. 2021:1-11.
421. Prandoni P, Cattelan AM, Carrozzi L, Leone L, Filippi L, De Gaudenzi E, et al. The hazard of fondaparinux in non-critically ill patients with COVID-19: Retrospective controlled study versus enoxaparin. *Thrombosis Research*. 2020;196:395-7.
422. Qu J, Li GH, Wang JJ, He GF, Huang JJ, Chen Y, et al. Comparative effectiveness of Lopinavir/Ritonavir- based regimens in COVID- 19. *Clinical and Experimental Pharmacology and Physiology*. 2021;48(2):203-10.
423. Rachman BE, Miatmoko A, Lardo S, Purnama YI, Laely M, Rochmad I, et al. A Randomized, Double-Blind, Multicenter Clinical Study Comparing the Efficacy and Safety of a Drug Combination of Lopinavir/Ritonavir-Azithromycin, Lopinavir/Ritonavir-Doxycycline, and Azithromycin-Hydroxychloroquine for Patients Diagnosed with Mild to Moderate COVID-19 Infections. *Biochemistry research international*. 2021;2021.
424. Rahman O, Trigonis RA, Craft MK, Kruer RM, Miller EM, Terry CL, et al. Corticosteroid Use in Severely Hypoxemic COVID-19 Patients: An observational cohort analysis of dosing patterns and outcomes in the early phase of the pandemic. *Medrxiv*. 2020.

**Comparative-effectiveness research of COVID-19 treatment: A rapid scoping review**

- 1  
2  
3 425. Rahmani H, Davoudi-Monfared E, Nourian A, Khalili H, Hajizadeh N, Jalalabadi  
4 NZ, et al. Interferon  $\beta$ -1b in treatment of severe COVID-19: a randomized clinical  
5 trial. *International immunopharmacology*. 2020;88:106903.  
6  
7 426. Rainwater-Lovett K, Redd JT, Stewart MA, Calles NE, Cuff T, Fang M, et al. Real-  
8 world Effect of Monoclonal Antibody Treatment in COVID-19 Patients in a Diverse  
9 Population in the United States. *medRxiv*. 2021.  
10  
11 427. Rajendram P, Sacha GL, Mehkri O, Wang X, Han X, Vachharajani V, et al.  
12 Tocilizumab in coronavirus disease 2019-related critical illness: a propensity matched  
13 analysis. *Critical care explorations*. 2021;3(1).  
14  
15 428. Rajter JC, Sherman MS, Fatteh N, Vogel F, Sacks J, Rajter J-J. Use of ivermectin is  
16 associated with lower mortality in hospitalized patients with coronavirus disease  
17 2019: the ivermectin in COVID nineteen study. *Chest*. 2021;159(1):85-92.  
18  
19 429. Ramakrishnan S, Nicolau DV, Langford B, Mahdi M, Jeffers H, Mwasuku C, et al.  
20 Inhaled budesonide in the treatment of early COVID-19 illness: a randomised  
21 controlled trial. 2021.  
22  
23 430. Ramakrishnan S, Nicolau Jr DV, Langford B, Mahdi M, Jeffers H, Mwasuku C, et al.  
24 Inhaled budesonide in the treatment of early COVID-19 (STOIC): a phase 2, open-  
25 label, randomised controlled trial. *The Lancet Respiratory Medicine*. 2021.  
26  
27 431. Raman R, Bhagwan Barge V, Anil Kumar D, Dandu H, Rakesh Kartha R, Bafna V, et  
28 al. A Phase II Safety and Efficacy Study on Prognosis of Moderate Pneumonia in  
29 Coronavirus Disease 2019 Patients With Regular Intravenous Immunoglobulin  
30 Therapy. *The Journal of Infectious Diseases*. 2021;223(9):1538-43.  
31  
32 432. Ramireddy A, Chugh H, Reinier K, Ebinger J, Park E, Thompson M, et al.  
33 Experience with hydroxychloroquine and azithromycin in the coronavirus disease  
34 2019 pandemic: implications for QT interval monitoring. *Journal of the American*  
35 *Heart Association*. 2020;9(12):e017144.  
36  
37 433. Ramiro S, Mostard RL, Magro-Checa C, Van Dongen CM, Dormans T, Buijs J, et al.  
38 Historically controlled comparison of glucocorticoids with or without tocilizumab  
39 versus supportive care only in patients with COVID-19-associated cytokine storm  
40 syndrome: results of the CHIC study. *Annals of the rheumatic diseases*.  
41 2020;79(9):1143-51.  
42  
43 434. Rana MA, Hashmi M, Qayyum A, Pervaiz R, Saleem M, Munir MF, et al.  
44 Comparison of efficacy of dexamethasone and methylprednisolone in improving  
45 PaO<sub>2</sub>/FiO<sub>2</sub> ratio among COVID-19 patients. *Cureus*. 2020;12(10).  
46  
47 435. Rangel LK, Shah P, Sicco KL, Caplan AS, Femia A. Chronic hydroxychloroquine  
48 therapy and COVID-19 outcomes: A retrospective case-control analysis. *Journal of*  
49 *the American Academy of Dermatology*. 2021;84(6):1769-72.  
50  
51 436. Ranjbar K, Moghadami M, Mirahmadizadeh A, Fallahi MJ, Khaloo V, Shahriarirad  
52 R, et al. Methylprednisolone or dexamethasone, which one is superior corticosteroid  
53 in the treatment of hospitalized COVID-19 patients: a triple-blinded randomized  
54 controlled trial. *BMC infectious diseases*. 2021;21(1):1-8.  
55  
56 437. Rashad A, Mousa S, Nafady-Hego H, Nafady A, Elgendy H. Short term survival of  
57 critically ill COVID-19 Egyptian patients on assisted ventilation treated by either  
58 Dexamethasone or Tocilizumab. *Scientific Reports*. 2021;11(1):1-7.  
59  
60 438. Rasheed AM, Fatak DF, Hashim HA, Maulood MF, Kabah KK, Abdulmir AS. The  
therapeutic potential of convalescent plasma therapy on treating critically-ill COVID-



**Comparative-effectiveness research of COVID-19 treatment: A rapid scoping review**

- 19 patients residing in respiratory care units in hospitals in Baghdad, Iraq. medRxiv. 2020.
439. Rashid RA, Zgair A, Al-Ani RM. Effect of nasal corticosteroid in the treatment of anosmia due to COVID-19: A randomised double-blind placebo-controlled study. *American Journal of Otolaryngology*. 2021;42(5):103033.
440. Rastogi A, Bhansali A, Khare N, Suri V, Yaddanapudi N, Sachdeva N, et al. Short term, high-dose vitamin D supplementation for COVID-19 disease: a randomised, placebo-controlled, study (SHADE study). *Postgraduate medical journal*. 2020.
441. Réa-Neto Á, Bernardelli RS, Câmara BMD, Reese FB, Queiroga MVO, Oliveira MC. An open-label randomized controlled trial evaluating the efficacy of chloroquine/hydroxychloroquine in severe COVID-19 patients. *Scientific reports*. 2021;11(1):1-10.
442. Reis G, Silva EAdSM, Silva DCM, Thabane L, Singh G, Park JJ, et al. Effect of Early Treatment With Hydroxychloroquine or Lopinavir and Ritonavir on Risk of Hospitalization Among Patients With COVID-19: The TOGETHER Randomized Clinical Trial. *JAMA network open*. 2021;4(4):e216468-e.
443. Ren L, Xu W, Overton JL, Yu S, Chiamvimonvat N, Thai PN. Assessment of Hydroxychloroquine and Chloroquine Safety Profiles-A Systematic Review and Meta-Analysis. *MedRxiv*. 2020.
444. Rentsch CT, Beckman JA, Tomlinson L, Gellad WF, Alcorn C, Kidwai-Khan F, et al. Early initiation of prophylactic anticoagulation for prevention of coronavirus disease 2019 mortality in patients admitted to hospital in the United States: cohort study. *BMJ*. 2021;372.
445. Rocco PR, Silva PL, Cruz FF, Melo-Junior MAC, Tierno PF, Moura MA, et al. Early use of nitazoxanide in mild Covid-19 disease: randomised, placebo-controlled trial. *European Respiratory Journal*. 2021;58(1).
446. Rodríguez-Baño J, Pachón J, Carratalà J, Ryan P, Jarrín I, Yllescas M, et al. Treatment with tocilizumab or corticosteroids for COVID-19 patients with hyperinflammatory state: a multicentre cohort study (SAM-COVID-19). *Clinical Microbiology and Infection*. 2021;27(2):244-52.
447. Rodriguez-Garcia JL, Sanchez-Nievas G, Arevalo-Serrano J, Garcia-Gomez C, Jimenez-Vizuite JM, Martinez-Alfaro E. Baricitinib improves respiratory function in patients treated with corticosteroids for SARS-CoV-2 pneumonia: an observational cohort study. *Rheumatology*. 2021;60(1):399-407.
448. Rodríguez-Molinero A, Pérez-López C, Gálvez-Barrón C, Miñarro A, Gullello EAR, Pérez IC, et al. Association between high-dose steroid therapy, respiratory function, and time to discharge in patients with COVID-19: Cohort study. *Medicina Clínica (English Edition)*. 2021;156(1):7-12.
449. Rodríguez-Molinero A, Pérez-López C, Gálvez-Barrón C, Miñarro A, Macho O, López GF, et al. Observational study of azithromycin in hospitalized patients with COVID-19. *PloS one*. 2020;15(9):e0238681.
450. Rodríguez-Molinero A, Pérez-López C, Gálvez-Barrón C, Miñarro A, Macho O, López GF, et al. Matched cohort study on the efficacy of tocilizumab in patients with COVID-19. *One Health*. 2021;12:100214.

**Comparative-effectiveness research of COVID-19 treatment: A rapid scoping review**

- 1  
2  
3 451. Rogers R, Shehadeh F, Mylona EK, Rich J, Neill M, Touzard-Romo F, et al.  
4 Convalescent Plasma for Patients With Severe Coronavirus Disease 2019 (COVID-  
5 19): A Matched Cohort Study. *Clinical Infectious Diseases*. 2021;73(1):e208-e14.
- 6 452. Rojas-Marte G, Khalid M, Mukhtar O, Hashmi AT, Waheed MA, Ehrlich S, et al.  
7 Outcomes in patients with severe COVID-19 disease treated with tocilizumab: a  
8 case–controlled study. *QJM: An International Journal of Medicine*. 2020;113(8):546-  
9 50.
- 10 453. Roomi S, Ullah W, Ahmed F, Farooq S, Sadiq U, Chohan A, et al. Efficacy of  
11 hydroxychloroquine and tocilizumab in patients with COVID-19: single-center  
12 retrospective chart review. *Journal of medical Internet research*. 2020;22(9):e21758.
- 13 454. Roozbeh F, Saeedi M, Alizadeh-Navaei R, Hedayatizadeh-Omran A, Merat S,  
14 Wentzel H, et al. Sofosbuvir and daclatasvir for the treatment of COVID-19  
15 outpatients: a double-blind, randomized controlled trial. *Journal of Antimicrobial  
16 Chemotherapy*. 2021;76(3):753-7.
- 17 455. Rosas IO, Bräu N, Waters M, Go RC, Hunter BD, Bhagani S, et al. Tocilizumab in  
18 hospitalized patients with severe Covid-19 pneumonia. *New England Journal of  
19 Medicine*. 2021;384(16):1503-16.
- 20 456. Rosas J, Liaño FP, Cantó ML, Barea JMC, Beser AR, Rabasa JTA, et al. Experience  
21 with the use of Baricitinib and tocilizumab monotherapy or combined, in patients  
22 with interstitial pneumonia secondary to coronavirus COVID19: a real-world study.  
23 *Reumatologia clinica*. 2020.
- 24 457. Rosenberg ES, Dufort EM, Udo T, Wilberschied LA, Kumar J, Tesoriero J, et al.  
25 Association of treatment with hydroxychloroquine or azithromycin with in-hospital  
26 mortality in patients with COVID-19 in New York State. *Jama*. 2020;323(24):2493-  
27 502.
- 28 458. Rossi B, Nguyen LS, Zimmermann P, Boucenna F, Dubret L, Baucher L, et al. Effect  
29 of tocilizumab in hospitalized patients with severe COVID-19 pneumonia: a case-  
30 control cohort study. *Pharmaceuticals*. 2020;13(10):317.
- 31 459. Rossotti R, Travi G, Ughi N, Corradin M, Baiguera C, Fumagalli R, et al. Safety and  
32 efficacy of anti-il6-receptor tocilizumab use in severe and critical patients affected by  
33 coronavirus disease 2019: a comparative analysis. *Journal of Infection*.  
34 2020;81(4):e11-e7.
- 35 460. Roumier M, Paule R, Vallée A, Rohmer J, Ballester M, Brun A-L, et al. Tocilizumab  
36 for severe worsening COVID-19 pneumonia: a propensity score analysis. *Journal of  
37 clinical immunology*. 2021;41(2):303-14.
- 38 461. Roy R, Pattadar C, Raj R, Agarwal N, Biswas B, Majhi PK, et al. Ivermectin as a  
39 potential treatment for mild to moderate COVID-19—a double blind randomized  
40 placebo-controlled trial. *MedRxiv*. 2021.
- 41 462. Roy-Vallejo E, Purificacion AS, Pena JDT, Moreno BS, Arnalich F, Blanco MJG, et al.  
42 Effect of in-hospital treatment with angiotensin-converting enzyme inhibitors and  
43 angiotensin II receptor blockers on mortality and complications in patients  
44 hospitalized for COVID-19: a large Spanish cohort study. *medRxiv*. 2021.
- 45 463. Ruan X, Lu X, Wang K, Zhang B, Wang J, Li Y, et al. Liver injury after antiviral  
46 treatment of critically ill patients with COVID-19: a single-centered retrospective  
47 cohort study. *Ann Palliat Med*. 2021:2429-38.
- 48  
49  
50  
51  
52  
53  
54  
55  
56  
57  
58  
59  
60

**Comparative-effectiveness research of COVID-19 treatment: A rapid scoping review**

- 1  
2  
3 464. Ruiz-Antorán B, Sancho-López A, Torres F, Moreno-Torres V, de Pablo-López I,  
4 García-López P, et al. Combination of tocilizumab and steroids to improve mortality  
5 in patients with severe COVID-19 infection: a Spanish, multicenter, cohort study.  
6 *Infectious diseases and therapy*. 2021;10(1):347-62.
- 7  
8 465. Ruiz-Irastorza G, Pijoan J-I, Bereciartua E, Dunder S, Dominguez J, Garcia-Escudero  
9 P, et al. Second week methyl-prednisolone pulses improve prognosis in patients with  
10 severe coronavirus disease 2019 pneumonia: An observational comparative study  
11 using routine care data. *PloS one*. 2020;15(9):e0239401.
- 12  
13 466. Russo V, Bottino R, D'Andrea A, Silverio A, Di Maio M, Golino P, et al. Chronic  
14 Oral Anticoagulation and Clinical Outcome in Hospitalized COVID-19 Patients.  
15 *Cardiovascular drugs and therapy*. 2021:1-8.
- 16  
17 467. Russo V, Cardillo G, Viggiano GV, Mangiacapra S, Cavalli A, Fontanella A, et al.  
18 Fondaparinux use in patients with COVID-19: a preliminary multicenter real-world  
19 experience. *Journal of Cardiovascular Pharmacology*. 2020;76(4):369-71.
- 20  
21 468. Sadeghi A, Ali Asgari A, Norouzi A, Kheiri Z, Anushirvani A, Montazeri M, et al.  
22 Sofosbuvir and daclatasvir compared with standard of care in the treatment of patients  
23 admitted to hospital with moderate or severe coronavirus infection (COVID-19): a  
24 randomized controlled trial. *Journal of Antimicrobial Chemotherapy*.  
25 2020;75(11):3379-85.
- 26  
27 469. Saggi SJ, Nath S, Culas R, Chittalae S, Burza A, Srinivasan M, et al. Early  
28 Experience With Methylprednisolone on SARS-CoV-2 Infection in the African  
29 American Population, a Retrospective Analysis. *Clinical Medicine Insights:  
30 Circulatory, Respiratory and Pulmonary Medicine*. 2020;14:1179548420980699.
- 31  
32 470. Sakoulas G, Geriak M, Kullar R, Greenwood K, Habib M, Vyas A, et al. Intravenous  
33 Immunoglobulin (IVIG) significantly reduces respiratory morbidity in COVID-19  
34 pneumonia: a prospective randomized trial. *medRxiv*. 2020.
- 35  
36 471. Sakoulas G, Geriak M, Kullar R, Greenwood KL, Habib M, Vyas A, et al.  
37 Intravenous immunoglobulin plus methylprednisolone mitigate respiratory morbidity  
38 in coronavirus disease 2019. *Critical care explorations*. 2020;2(11).
- 39  
40 472. Salama C, Han J, Yau L, Reiss WG, Kramer B, Neidhart JD, et al. Tocilizumab in  
41 patients hospitalized with Covid-19 pneumonia. *New England Journal of Medicine*.  
42 2021;384(1):20-30.
- 43  
44 473. Salazar E, Christensen PA, Graviss EA, Nguyen DT, Castillo B, Chen J, et al.  
45 Treatment of coronavirus disease 2019 patients with convalescent plasma reveals a  
46 signal of significantly decreased mortality. *The American journal of pathology*.  
47 2020;190(11):2290-303.
- 48  
49 474. Salazar MR, González SE, Regairaz L, Ferrando NS, González Martínez VV, Carrera  
50 Ramos PM, et al. Risk factors for COVID-19 mortality: The effect of convalescent  
51 plasma administration. *Plos one*. 2021;16(4):e0250386.
- 52  
53 475. Saleemi SA, Alrajhi A, Alhajji M, Alfattani A, Albaiz F. Time to negative PCR from  
54 symptom onset in COVID-19 patients on Hydroxychloroquine and Azithromycin-A  
55 real world experience. *MedRxiv*. 2020.
- 56  
57 476. Saleh M, Gabriels J, Chang D, Soo Kim B, Mansoor A, Mahmood E, et al. Effect of  
58 chloroquine, hydroxychloroquine, and azithromycin on the corrected QT interval in  
59 patients with SARS-CoV-2 infection. *Circulation: Arrhythmia and Electrophysiology*.  
60 2020;13(6):e008662.

**Comparative-effectiveness research of COVID-19 treatment: A rapid scoping review**

- 1
- 2
- 3
- 4 477. Salton F, Confalonieri P, Meduri GU, Santus P, Harari S, Scala R, et al., editors. Prolonged low-dose methylprednisolone in patients with severe COVID-19 pneumonia. *Open forum infectious diseases*; 2020: Oxford University Press US.
- 5
- 6 478. Salvarani C, Dolci G, Massari M, Merlo DF, Cavuto S, Savoldi L, et al. Effect of tocilizumab vs standard care on clinical worsening in patients hospitalized with COVID-19 pneumonia: a randomized clinical trial. *JAMA internal medicine*. 2021;181(1):24-31.
- 7
- 8
- 9
- 10
- 11 479. Salvati L, Occhipinti M, Gori L, Ciani L, Mazzoni A, Maggi L, et al. Pulmonary vascular improvement in severe COVID-19 patients treated with tocilizumab. *Immunology Letters*. 2020;228:122-8.
- 12
- 13
- 14 480. Sammartino D, Jafri F, Cook B, La L, Kim H, Cardasis J, et al. Predictors for inpatient mortality during the first wave of the SARS-CoV-2 pandemic: A retrospective analysis. *PloS one*. 2021;16(5):e0251262.
- 15
- 16
- 17 481. Sandhu T, Tieng A, Chilimuri S, Franchin G. A case control study to evaluate the impact of colchicine on patients admitted to the hospital with moderate to severe COVID-19 infection. *Canadian Journal of Infectious Diseases and Medical Microbiology*. 2020;2020.
- 18
- 19
- 20
- 21
- 22 482. Sands K, Wenzel R, McLean L, Korwek K, Roach J, Miller K, et al. No clinical benefit in mortality associated with hydroxychloroquine treatment in patients with COVID-19. *International Journal of Infectious Diseases*. 2021;104:34-40.
- 23
- 24
- 25 483. Santoro F, Núñez-Gil IJ, Viana-Llamas MC, Maroun Eid C, Romero R, Fernández Rozas I, et al. Anticoagulation Therapy in Patients With Coronavirus Disease 2019: Results From a Multicenter International Prospective Registry (Health Outcome Predictive Evaluation for Corona Virus Disease 2019 [HOPE-COVID19]). *Critical Care Medicine*. 2021;49(6):e624-e33.
- 26
- 27
- 28
- 29
- 30
- 31 484. Sarayani A, Cicali B, Henriksen CH, Brown JD. Safety signals for QT prolongation or Torsades de Pointes associated with azithromycin with or without chloroquine or hydroxychloroquine. *Research in Social and Administrative Pharmacy*. 2021;17(2):483-6.
- 32
- 33
- 34 485. Sayed AM, Khalaf AM, Abdelrahim ME, Elgendy MO. Repurposing of some anti-infective drugs for COVID- 19 treatment: A surveillance study supported by an in silico investigation. *International Journal of Clinical Practice*. 2021;75(4):e13877.
- 35
- 36
- 37 486. Sbidian E, Josse J, Lemaitre G, Mayer I, Bernaux M, Gramfort A, et al. Hydroxychloroquine with or without azithromycin and in-hospital mortality or discharge in patients hospitalized for COVID-19 infection: a cohort study of 4,642 in-patients in France. *MedRxiv*. 2020.
- 38
- 39
- 40
- 41 487. Scarsi M, Piantoni S, Colombo E, Airó P, Richini D, Miclini M, et al. Association between treatment with colchicine and improved survival in a single-centre cohort of adult hospitalised patients with COVID-19 pneumonia and acute respiratory distress syndrome. *Annals of the rheumatic diseases*. 2020;79(10):1286-9.
- 42
- 43
- 44
- 45 488. Schneider J, Jaenigen B, Wagner D, Rieg S, Hornuss D, Biever PM, et al. Therapy with lopinavir/ritonavir and hydroxychloroquine is associated with acute kidney injury in COVID-19 patients. *Plos one*. 2021;16(5):e0249760.
- 46
- 47
- 48
- 49
- 50 489. Schooling C, Yeung SA, Kwok M, Zhao J. Genetic validation of the use of tocilizumab, statins and dexamethasone in COVID-19. *medRxiv*. 2020.
- 51
- 52
- 53
- 54
- 55
- 56
- 57
- 58
- 59
- 60

**Comparative-effectiveness research of COVID-19 treatment: A rapid scoping review**

- 1  
2  
3  
4  
5  
6  
7  
8  
9  
10  
11  
12  
13  
14  
15  
16  
17  
18  
19  
20  
21  
22  
23  
24  
25  
26  
27  
28  
29  
30  
31  
32  
33  
34  
35  
36  
37  
38  
39  
40  
41  
42  
43  
44  
45  
46  
47  
48  
49  
50  
51  
52  
53  
54  
55  
56  
57  
58  
59  
60
490. Sekhavati E, Jafari F, SeyedAlinaghi S, Jamalimoghadamsiahkali S, Sadr S, Tabarestani M, et al. Safety and effectiveness of azithromycin in patients with COVID-19: an open-label randomised trial. *International journal of antimicrobial agents*. 2020;56(4):106143.
491. Self WH, Semler MW, Leither LM, Casey JD, Angus DC, Brower RG, et al. Effect of hydroxychloroquine on clinical status at 14 days in hospitalized patients with COVID-19: a randomized clinical trial. *Jama*. 2020;324(21):2165-76.
492. Sevilla-Castillo F, Roque-Reyes OJ, Romero-Lechuga F, Gómez-Núñez MF, Castillo-López M, Medina-Santos D, et al. Both Chloroquine and Lopinavir/Ritonavir Are Ineffective for COVID-19 Treatment and Combined Worsen the Pathology: A Single-Center Experience with Severely Ill Patients. *BioMed Research International*. 2021;2021.
493. Seyhan AU, Doganay F, Yilmaz E, Topal NP, Ak R. Investigation of QT prolongation with hydroxychloroquine and azithromycin for the treatment of COVID-19. *Journal of the College of Physicians and Surgeons Pakistan*. 2020;30(10S1):S153-S.
494. Shao Z, Feng Y, Zhong L, Xie Q, Lei M, Liu Z, et al. Clinical efficacy of intravenous immunoglobulin therapy in critical ill patients with COVID- 19: a multicenter retrospective cohort study. *Clinical & translational immunology*. 2020;9(10):e1192.
495. Shen L, Qiu L, Liu D, Wang L, Huang H, Ge H, et al. The association of low molecular weight heparin use and in-hospital mortality among patients hospitalized with COVID-19. *Cardiovascular Drugs and Therapy*. 2021:1-8.
496. Shenoy AG, Hettinger AZ, Fernandez SJ, Blumenthal J, Baez V. Early mortality benefit with COVID- 19 convalescent plasma: a matched control study. *British journal of haematology*. 2021;192(4):706-13.
497. Shi C, Wang C, Wang H, Yang C, Cai F, Zeng F, et al. The potential of low molecular weight heparin to mitigate cytokine storm in severe COVID- 19 patients: a retrospective cohort study. *Clinical and translational science*. 2020;13(6):1087-95.
498. Shi L, Huang H, Lu X, Yan X, Jiang X, Xu R, et al. Effect of human umbilical cord-derived mesenchymal stem cells on lung damage in severe COVID-19 patients: a randomized, double-blind, placebo-controlled phase 2 trial. *Signal transduction and targeted therapy*. 2021;6(1):1-9.
499. Shi L, Huang H, Lu X, Yan X, Jiang X, Xu R, et al. Effect of human umbilical cord-derived mesenchymal stem cells on lung damage in severe COVID-19 patients: a randomized, double-blind, placebo-controlled phase 2 trial. *Signal transduction and targeted therapy*. 2021;6(1):1-9.
500. Shoaibi A, Fortin SP, Weinstein R, Berlin JA, Ryan P. Comparative effectiveness of famotidine in hospitalized COVID-19 patients. *Official journal of the American College of Gastroenterology | ACG*. 2021;116(4):692-9.
501. Shu L, Niu C, Li R, Huang T, Wang Y, Huang M, et al. Treatment of severe COVID-19 with human umbilical cord mesenchymal stem cells. *Stem cell research & therapy*. 2020;11(1):1-11.
502. Siami Z, Aghajanian S, Mansouri S, Mokhames Z, Pakzad R, Kabir K, et al. Effect of Ammonium Chloride in addition to standard of care in outpatients and hospitalized COVID-19 patients: a randomized clinical trial. *International Journal of Infectious Diseases*. 2021;108:306-8.

**Comparative-effectiveness research of COVID-19 treatment: A rapid scoping review**

- 1
- 2
- 3 503. Silva M, Espejo A, Pereyra ML, Lynch M, Thompson M, Taconelli H, et al. Efficacy
- 4 of Nitazoxanide in reducing the viral load in COVID-19 patients. Randomized,
- 5 placebo-controlled, single-blinded, parallel group, pilot study. medRxiv. 2021.
- 6 504. Simonovich VA, Burgos Pratz LD, Scibona P, Beruto MV, Vallone MG, Vázquez C,
- 7 et al. A randomized trial of convalescent plasma in Covid-19 severe pneumonia. *New*
- 8 *England Journal of Medicine*. 2021;384(7):619-29.
- 9 505. Singh AK, Singh A, Singh R, Misra A. Remdesivir in COVID-19: a critical review of
- 10 pharmacology, pre-clinical and clinical studies. *Diabetes & Metabolic Syndrome:*
- 11 *Clinical Research & Reviews*. 2020;14(4):641-8.
- 12 506. Singh S, John T, Kumar P, Quadery SR. The impact of high dose oral cotrimoxazole
- 13 in patients with COVID-19 with hypoxic respiratory failure requiring non-invasive
- 14 ventilation: A Case Control Study. medRxiv. 2021.
- 15 507. Singh S, Khan A, Chowdhry M, Chatterjee A. Outcomes of hydroxychloroquine
- 16 treatment among hospitalized COVID-19 patients in the United States-real-world
- 17 evidence from a federated electronic medical record network. *MedRxiv*. 2020.
- 18 508. Sinha P, Jafarzadeh SR, Assoumou SA, Bielick CG, Carpenter B, Garg S, et al. The
- 19 effect of IL-6 inhibitors on mortality among hospitalized COVID-19 patients: a
- 20 multicenter study. *The Journal of infectious diseases*. 2021;223(4):581-8.
- 21 509. Sinha P, Mostaghim A, Bielick CG, McLaughlin A, Hamer DH, Wetzler LM, et al.
- 22 Early administration of interleukin-6 inhibitors for patients with severe COVID-19
- 23 disease is associated with decreased intubation, reduced mortality, and increased
- 24 discharge. *International Journal of Infectious Diseases*. 2020;99:28-33.
- 25 510. Sinkeler F, Berger F, Muntinga H, Jansen M. The risk of QTc-interval prolongation
- 26 in COVID-19 patients treated with chloroquine. *Netherlands Heart Journal*.
- 27 2020;28(7):418-23.
- 28 511. Sivaloganathan H, Ladikou EE, Chevassut T. COVID- 19 mortality in patients on
- 29 anticoagulants and antiplatelet agents. *British journal of haematology*. 2020.
- 30 512. Sivapalasingam S, Lederer D, Bhore R, Hajizadeh N, Criner G, Hossain R, et al. A
- 31 Randomized Placebo-Controlled Trial of Sarilumab in Hospitalized Patients with
- 32 Covid-19. medRxiv. 2021.
- 33 513. Skipper CP, Pastick KA, Engen NW, Bangdiwala AS, Abassi M, Lofgren SM, et al.
- 34 Hydroxychloroquine in nonhospitalized adults with early COVID-19: a randomized
- 35 trial. *Annals of internal medicine*. 2020;173(8):623-31.
- 36 514. Soin AS, Kumar K, Choudhary NS, Sharma P, Mehta Y, Kataria S, et al. Tocilizumab
- 37 plus standard care versus standard care in patients in India with moderate to severe
- 38 COVID-19-associated cytokine release syndrome (COVINTOC): an open-label,
- 39 multicentre, randomised, controlled, phase 3 trial. *The Lancet Respiratory Medicine*.
- 40 2021;9(5):511-21.
- 41 515. Solaymani-Dodaran M, Ghanei M, Bagheri M, Qazvini A, Vahedi E, Saadat SH, et
- 42 al. Safety and efficacy of Favipiravir in moderate to severe SARS-CoV-2 pneumonia.
- 43 *International Immunopharmacology*. 2021;95:107522.
- 44 516. Somers EC, Eschenauer GA, Troost JP, Golob JL, Gandhi TN, Wang L, et al.
- 45 Tocilizumab for treatment of mechanically ventilated patients with COVID-19.
- 46 *Clinical Infectious Diseases*. 2021;73(2):e445-e54.
- 47
- 48
- 49
- 50
- 51
- 52
- 53
- 54
- 55
- 56
- 57
- 58
- 59
- 60

**Comparative-effectiveness research of COVID-19 treatment: A rapid scoping review**

- 1 517. Sostin OV, Rajapakse P, Cruser B, Wakefield D, Cruser D, Petrini J. A matched  
2 cohort study of convalescent plasma therapy for COVID- 19. *Journal of clinical*  
3 *apheresis*. 2021.
- 4 518. Soto-Becerra P, Culquichicón C, Hurtado-Roca Y, Araujo-Castillo RV. Real-world  
5 effectiveness of hydroxychloroquine, azithromycin, and ivermectin among  
6 hospitalized COVID-19 patients: results of a target trial emulation using  
7 observational data from a nationwide healthcare system in Peru. *Azithromycin, and*  
8 *Ivermectin Among Hospitalized COVID-19 Patients: Results of a Target Trial*  
9 *Emulation Using Observational Data from a Nationwide Healthcare System in Peru*.  
10 2020.
- 11 519. Spagnuolo V, Guffanti M, Galli L, Poli A, Querini PR, Ripa M, et al. Viral clearance  
12 after early corticosteroid treatment in patients with moderate or severe covid-19.  
13 *Scientific Reports*. 2020;10(1):1-7.
- 14 520. Spinner CD, Gottlieb RL, Criner GJ, López JRA, Cattelan AM, Viladomiu AS, et al.  
15 Effect of remdesivir vs standard care on clinical status at 11 days in patients with  
16 moderate COVID-19: a randomized clinical trial. *Jama*. 2020;324(11):1048-57.
- 17 521. Spinner CD, Gottlieb RL, Criner GJ, López JRA, Cattelan AM, Viladomiu AS, et al.  
18 Effect of remdesivir vs standard care on clinical status at 11 days in patients with  
19 moderate COVID-19: a randomized clinical trial. *Jama*. 2020;324(11):1048-57.
- 20 522. Stanevich OV, Fomina DS, Bakulin IG, Galeev SI, Bakin EA, Belash VA, et al.  
21 Ruxolitinib Versus Dexamethasone in Hospitalized Adults With COVID-19:  
22 Multicenter Matched Cohort Study. 2021.
- 23 523. Stewart M, Rodriguez-Watson C, Albayrak A, Asubonteng J, Belli A, Brown T, et al.  
24 COVID-19 Evidence Accelerator: A parallel analysis to describe the use of  
25 Hydroxychloroquine with or without Azithromycin among hospitalized COVID-19  
26 patients. *Plos one*. 2021;16(3):e0248128.
- 27 524. Stone JH, Frigault MJ, Serling-Boyd NJ, Fernandes AD, Harvey L, Foulkes AS, et al.  
28 Efficacy of tocilizumab in patients hospitalized with Covid-19. *New England Journal*  
29 *of Medicine*. 2020;383(24):2333-44.
- 30 525. Strohbehn GW, Heiss BL, Rouhani SJ, Trujillo JA, Yu J, Kacew AJ, et al.  
31 COVIDOSE: Low-dose tocilizumab in the treatment of Covid-19. *medRxiv*. 2020.
- 32 526. Sturek JM, Thomas TA, Gorham JD, Sheppard CA, Raymond AE, De Guex KP, et  
33 al. Convalescent plasma for preventing critical illness in COVID-19: A phase 2 trial  
34 and immune profile. *medRxiv*. 2021.
- 35 527. Su Y, Ling Y, Ma Y, Tao L, Miao Q, Shi Q, et al. Efficacy of early  
36 hydroxychloroquine treatment in preventing COVID-19 pneumonia aggravation, the  
37 experience from Shanghai, China. *Bioscience trends*. 2020;14(6):408-14.
- 38 528. Sulaiman T, Mohana A, Alawdah L, Mahmoud N, Hassanein M, Wani T, et al. The  
39 effect of early hydroxychloroquine-based therapy in COVID-19 patients in  
40 ambulatory care settings: a nationwide prospective cohort study. *medRxiv*. 2020.
- 41 529. Sun Q, Xie J, Zheng R, Li X, Chen H, Tong Z, et al. The effect of thymosin  $\alpha$ 1 on  
42 mortality of critical COVID-19 patients: A multicenter retrospective study.  
43 *International Immunopharmacology*. 2021;90:107143.
- 44 530. Tabarsi P, Barati S, Jamaati H, Haseli S, Marjani M, Moniri A, et al. Evaluating the  
45 effects of intravenous immunoglobulin (IVIg) on the management of severe COVID-  
46  
47  
48  
49  
50  
51  
52  
53  
54  
55  
56  
57  
58  
59  
60

**Comparative-effectiveness research of COVID-19 treatment: A rapid scoping review**

- 19 cases: a randomized controlled trial. *International immunopharmacology*. 2021;90:107205.
531. Taccone FS, Gevenois PA, Peluso L, Pletchette Z, Lheureux O, Brasseur A, et al. Higher intensity thromboprophylaxis regimens and pulmonary embolism in critically ill coronavirus disease 2019 patients. *Critical care medicine*. 2020.
532. Tacquard C, Mansour A, Godon A, Godet J, Poissy J, Garrigue D, et al. Impact of high-dose prophylactic anticoagulation in critically ill patients with coronavirus disease 2019 pneumonia. *Chest*. 2021.
533. Tan CW, Ho LP, Kalimuddin S, Cherng BPZ, Teh YE, Thien SY, Wong HM, Tern PJW, Chandran M, Chay JWM, Nagarajan C, Sultana R, Low JGH, Ng HJ. Cohort study to evaluate the effect of vitamin D, magnesium, and vitamin B12 in combination on progression to severe outcomes in older patients with coronavirus (COVID-19). *Nutrition*. 2020;79-80:111017.
534. Tang W, Cao Z, Han M, Wang Z, Chen J, Sun W, et al. Hydroxychloroquine in patients with mainly mild to moderate coronavirus disease 2019: open label, randomised controlled trial. *bmj*. 2020;369.
535. Tang X, Feng Y-M, Ni J-X, Zhang J-Y, Liu L-M, Hu K, et al. Early use of corticosteroid may prolong SARS-CoV-2 shedding in non-intensive care unit patients with COVID-19 pneumonia: a multicenter, single-blind, randomized control trial. *Respiration*. 2021;100(2):116-26.
536. Temesgen Z, Assi M, Shweta F, Vergidis P, Rizza SA, Bauer PR, et al., editors. GM-CSF neutralization with lenzilumab in severe COVID-19 pneumonia: a case-cohort study. *Mayo Clinic Proceedings*; 2020: Elsevier.
537. Temesgen Z, Burger CD, Baker J, Polk C, Libertin C, Kelley C, et al. Lenzilumab Efficacy And Safety In Newly Hospitalized Covid-19 Subjects: Results From The Live-Air Phase 3 Randomized Double-Blind Placebo-Controlled Trial. *medRxiv*. 2021.
538. Thakar A, Panda S, Sakthivel P, Brijwal M, Dhakad S, Choudekar A, et al. Chloroquine nasal drops in asymptomatic & mild COVID-19: An exploratory randomized clinical trial. *The Indian journal of medical research*. 2021;153(1-2):151.
539. Tharoux P-L, Pialoux G, Pavot A, Mariette X, Hermine O, Resche-Rigon M, et al. Effect of anakinra versus usual care in adults in hospital with COVID-19 and mild-to-moderate pneumonia (CORIMUNO-ANA-1): a randomised controlled trial. *The Lancet Respiratory Medicine*. 2021;9(3):295-304.
540. Thomas S, Patel D, Bittel B, Wolski K, Wang Q, Kumar A, et al. Effect of high-dose zinc and ascorbic acid supplementation vs usual care on symptom length and reduction among ambulatory patients with SARS-CoV-2 infection: the COVID A to Z randomized clinical trial. *JAMA network open*. 2021;4(2):e210369-e.
541. Thomas S, Patel D, Bittel B, Wolski K, Wang Q, Kumar A, et al. Effect of high-dose zinc and ascorbic acid supplementation vs usual care on symptom length and reduction among ambulatory patients with SARS-CoV-2 infection: the COVID A to Z randomized clinical trial. *JAMA network open*. 2021;4(2):e210369-e.
542. Thompson MA, Henderson JP, Shah PK, Rubinstein SM, Joyner MJ, Choueiri TK, et al. Convalescent plasma and improved survival in patients with hematologic malignancies and COVID-19. *medRxiv*. 2021.



**Comparative-effectiveness research of COVID-19 treatment: A rapid scoping review**

- 1  
2  
3 543. Tian J, Zhang M, Jin M, Zhang F, Chu Q, Wang X, et al. Repurposed tocilizumab in  
4 patients with severe COVID-19. *The Journal of Immunology*. 2021;206(3):599-606.  
5 544. Tolouian R, Mulla ZD, Jamaati H, Babamahmoodi A, Marjani M, Eskandari R, et al.  
6 Effect of bromhexine in hospitalized patients with COVID-19. *Journal of*  
7 *Investigative Medicine*. 2021.  
8 545. Tomazini BM, Maia IS, Cavalcanti AB, Berwanger O, Rosa RG, Veiga VC, et al.  
9 Effect of dexamethasone on days alive and ventilator-free in patients with moderate  
10 or severe acute respiratory distress syndrome and COVID-19: the CoDEX  
11 randomized clinical trial. *Jama*. 2020;324(13):1307-16.  
12 546. Tong S, Su Y, Yu Y, Wu C, Chen J, Wang S, et al. Ribavirin therapy for severe  
13 COVID-19: a retrospective cohort study. *International journal of antimicrobial*  
14 *agents*. 2020;56(3):106114.  
15 547. Tortajada C, Colomer E, Andreu- Ballester JC, Esparcia A, Oltra C, Flores J.  
16 Corticosteroids for COVID- 19 patients requiring oxygen support? Yes, but not for  
17 everyone: Effect of corticosteroids on mortality and intensive care unit admission in  
18 patients with COVID- 19 according to patients' oxygen requirements. *Journal of*  
19 *Medical Virology*. 2021;93(3):1817-23.  
20 548. Touafchia A, Bagheri H, Carrié D, Durrieu G, Sommet A, Chouchana L, et al.  
21 Serious bradycardia and remdesivir for coronavirus 2019 (COVID-19): a new safety  
22 concerns. *Clinical Microbiology and Infection*. 2021;27(5):791. e5-. e8.  
23 549. Tran V-T, Mahévas M, Bani-Sadr F, Robineau O, Perpoint T, Perrodeau E, et al.  
24 Corticosteroids in patients hospitalized for COVID-19 pneumonia who require  
25 oxygen: observational comparative study using routine care data. *Clinical*  
26 *Microbiology and Infection*. 2021;27(4):603-10.  
27 550. Tran V-T, Mahevas M, Sadr FB, Robineau O, Perpoint T, Perrodeau E, et al.  
28 Association between corticosteroids and intubation or death among patients with  
29 COVID-19 pneumonia in non-ICU settings: an observational study using of real-  
30 world data from 51 hospitals in France and Luxembourg. *medRxiv*. 2020.  
31 551. Trinh M, Chang DR, Govindarajulu US, Kane E, Fuster V, Kohli-Seth R, et al.  
32 Therapeutic anticoagulation is associated with decreased mortality in mechanically  
33 ventilated COVID-19 patients. *medRxiv*. 2020.  
34 552. Tsai A, Diawara O, Nahass RG, Brunetti L. Impact of tocilizumab administration on  
35 mortality in severe COVID-19. *Scientific reports*. 2020;10(1):1-7.  
36 553. Tsiakos K, Tsakiris A, Tsibris G, Voutsinas P, Panagopoulos P, Kosmidou M, et al.  
37 Oral clarithromycin in COVID-19 of moderate severity: the ACHIEVE open-label  
38 trial using concurrent matched comparators. *medRxiv*. 2020.  
39 554. Tworek A, Jaroń K, Uszyńska-Kałuża B, Rydzewski A, Gil R, Deptała A, et al.  
40 Convalescent plasma treatment is associated with lower mortality and better  
41 outcomes in high-risk COVID-19 patients—propensity-score matched case-control  
42 study. *International Journal of Infectious Diseases*. 2021;105:209-15.  
43 555. Udawadia ZF, Singh P, Barkate H, Patil S, Rangwala S, Pendse A, et al. Efficacy and  
44 safety of favipiravir, an oral RNA-dependent RNA polymerase inhibitor, in mild-to-  
45 moderate COVID-19: A randomized, comparative, open-label, multicenter, phase 3  
46 clinical trial. *International Journal of Infectious Diseases*. 2021;103:62-71.  
47 556. Ulrich RJ, Troxel AB, Carmody E, Eapen J, Bäcker M, DeHovitz JA, et al., editors.  
48 Treating COVID-19 with hydroxychloroquine (TEACH): a multicenter, double-blind  
49  
50  
51  
52  
53  
54  
55  
56  
57  
58  
59  
60

**Comparative-effectiveness research of COVID-19 treatment: A rapid scoping review**

- randomized controlled trial in hospitalized patients. *Open forum infectious diseases*; 2020: Oxford University Press US.
557. Vahedi E, Ghanei M, Ghazvini A, Azadi H, Izadi M, Panahi Y, et al. The clinical value of two combination regimens in the Management of Patients Suffering from Covid-19 pneumonia: a single centered, retrospective, observational study. *DARU Journal of Pharmaceutical Sciences*. 2020;28(2):507-16.
558. Vaira LA, Hopkins C, Petrocelli M, Lechien JR, Cutrupi S, Salzano G, et al. Efficacy of corticosteroid therapy in the treatment of long-lasting olfactory disorders in COVID-19 patients. *Rhinology*. 2020.
559. Valerio Pascua F, Diaz O, Medina R, Contreras B, Mistroff J, Espinosa D, et al. A multi-mechanism approach reduces length of stay in the ICU for severe COVID-19 patients. *PloS one*. 2021;16(1):e0245025.
560. Van den Eynde E, Gasch O, Oliva J, Prieto E, Calzado S, Gomila A, et al. Corticosteroids and tocilizumab reduce in-hospital mortality in severe COVID-19 pneumonia: a retrospective study in a Spanish hospital. *Infectious Diseases*. 2021;53(4):291-302.
561. Vasylyeva O, Chen T, Hanna J. Remdesivir for COVID-19: match-population analysis with compassionate use of Remdesivir for severe COVID-19. *medRxiv*. 2020.
562. Veiga VC, Prats JA, Farias DL, Rosa RG, Dourado LK, Zampieri FG, et al. Effect of tocilizumab on clinical outcomes at 15 days in patients with severe or critical coronavirus disease 2019: randomised controlled trial. *Bmj*. 2021;372.
563. Vernaz-Hegi N, Agoritsas T, Calmy A, Gayet-Ageron A, Gold G, Perrier A, et al. Early experimental COVID-19 therapies: associations with length of hospital stay, mortality and related costs. *Swiss Medical Weekly*. 2020;150:w20446.
564. Vlaar AP, de Bruin S, Busch M, Timmermans SA, van Zeggeren IE, Koning R, et al. Anti-C5a antibody IFX-1 (vilobelimab) treatment versus best supportive care for patients with severe COVID-19 (PANAMO): an exploratory, open-label, phase 2 randomised controlled trial. *The Lancet Rheumatology*. 2020;2(12):e764-e73.
565. Wadud N, Ahmed N, Shergil MM, Khan M, Krishna MG, Gilani A, et al. Improved survival outcome in SARs-CoV-2 (COVID-19) acute respiratory distress syndrome patients with tocilizumab administration. *medRxiv*. 2020.
566. Wadud N, Ahmed N, Shergill M, Khan M, Krishna M, Gilani A, et al. 151: Does Tocilizumab Improve Survival Outcome in COVID-19 Acute Respiratory Distress Syndrome Patients? *Critical Care Medicine*. 2021;49(1):61.
567. Wall GC, Smith HL, Trump MW, Mohr JD, DuMontier SP, Sabates BL, et al. Pentoxifylline or theophylline use in hospitalized COVID- 19 patients requiring oxygen support. *The Clinical Respiratory Journal*. 2021.
568. Wang B, Li D, Liu T, Wang H, Luo F, Liu Y. Subcutaneous injection of IFN alpha-2b for COVID-19: an observational study. *BMC infectious diseases*. 2020;20(1):1-6.
569. Wang D, Fu B, Peng Z, Yang D, Han M, Li M, et al. Tocilizumab in patients with moderate or severe COVID-19: a randomized, controlled, open-label, multicenter trial. *Frontiers of medicine*. 2021:1-9.
570. Wang M, Zhao Y, Hu W, Zhao D, Zhang Y, Wang T, et al. Treatment of COVID-19 Patients with Prolonged Post-Symptomatic Viral Shedding with Leflunomide--a

**Comparative-effectiveness research of COVID-19 treatment: A rapid scoping review**

- 1  
2  
3  
4  
5  
6  
7  
8  
9  
10  
11  
12  
13  
14  
15  
16  
17  
18  
19  
20  
21  
22  
23  
24  
25  
26  
27  
28  
29  
30  
31  
32  
33  
34  
35  
36  
37  
38  
39  
40  
41  
42  
43  
44  
45  
46  
47  
48  
49  
50  
51  
52  
53  
54  
55  
56  
57  
58  
59  
60
- Single-Center, Randomized, Controlled Clinical Trial. *Clinical Infectious Diseases: An Official Publication of the Infectious Diseases Society of America*. 2020.
571. Wang Q, Guo H, Li Y, Jian X, Hou X, Zhong N, et al. Efficacy and safety of leflunomide for refractory COVID-19: an open-label controlled study. *MedRxiv*. 2020.
572. Wang W, Zhao X, Wei W, Fan W, Gao K, He S, et al. Angiotensin-converting enzyme inhibitors (ACEI) or angiotensin receptor blockers (ARBs) may be safe for COVID-19 patients. *BMC infectious diseases*. 2021;21(1):1-8.
573. Wang X, Xie P, Sun G, Zhao M, Deng Z, Zhou Y, et al. A systematic review and meta-analysis of the efficacy and safety of arbidol in the treatment of coronavirus disease 2019. *Medicine*. 2020;99(30).
574. Wang Y, Jiang W, He Q, Wang C, Wang B, Zhou P, et al. Early, low-dose and short-term application of corticosteroid treatment in patients with severe COVID-19 pneumonia: single-center experience from Wuhan, China. *MedRxiv*. 2020.
575. Wang Y, Zhang D, Du G, Du R, Zhao J, Jin Y, et al. Remdesivir in adults with severe COVID-19: a randomised, double-blind, placebo-controlled, multicentre trial. *The lancet*. 2020;395(10236):1569-78.
576. Webb BJ, Buckel W, Vento T, Butler AM, Grisel N, Brown SM, et al. Real-World Effectiveness and Tolerability of Monoclonal Antibodies for Ambulatory Patients with Early COVID-19. *medRxiv*. 2021.
577. Weinreich DM, Sivapalasingam S, Norton T, Ali S, Gao H, Bhore R, et al. REGN-COV2, a neutralizing antibody cocktail, in outpatients with Covid-19. *New England Journal of Medicine*. 2021;384(3):238-51.
578. Wong CK, Wan EY, Luo S, Ding Y, Lau EH, Ling P, et al. Clinical outcomes of different therapeutic options for COVID-19 in two Chinese case cohorts: A propensity-score analysis. *EClinicalMedicine*. 2021;32:100743.
579. Wu C, Hou D, Du C, Cai Y, Zheng J, Xu J, et al. Corticosteroid therapy for coronavirus disease 2019-related acute respiratory distress syndrome: a cohort study with propensity score analysis. *Critical Care*. 2020;24(1):1-10.
580. Wu J, Huang J, Zhu G, Liu Y, Xiao H, Zhou Q, et al. Systemic corticosteroids and mortality in severe and critical COVID-19 patients in Wuhan, China. *The Journal of Clinical Endocrinology & Metabolism*. 2020;105(12):e4230-e9.
581. Wu M, Ji J-J, Zhong L, Shao Z-Y, Xie Q-F, Liu Z-Y, et al. Thymosin  $\alpha$ 1 therapy in critically ill patients with COVID-19: a multicenter retrospective cohort study. *International immunopharmacology*. 2020;88:106873.
582. Wu X, Yu K, Wang Y, Xu W, Ma H, Hou Y, et al. Efficacy and safety of triazavirin therapy for coronavirus disease 2019: a pilot randomized controlled trial. *Engineering*. 2020;6(10):1185-91.
583. Xia X, Li K, Wu L, Wang Z, Zhu M, Huang B, et al. Improved Clinical Symptoms and Mortality on Severe/Critical COVID-19 Patients Utilizing Convalescent Plasma Transfusion. *Blood*. 2020.
584. Xu P, Huang J, Fan Z, Huang W, Qi M, Lin X, et al. Arbidol/IFN- $\alpha$ 2b therapy for patients with corona virus disease 2019: a retrospective multicenter cohort study. *Microbes and infection*. 2020;22(4-5):200-5.
585. Xu X, Jiang W, Chen L, Xu Z, Zhang Q, Zhu M, et al. Evaluation of the safety and efficacy of using human menstrual blood- derived mesenchymal stromal cells in

**Comparative-effectiveness research of COVID-19 treatment: A rapid scoping review**

- 1  
2  
3 treating severe and critically ill COVID- 19 patients: An exploratory clinical trial.  
4 Clinical and translational medicine. 2021;11(2):e297.
- 5 586. Xue H, Liu Y, Luo P, Liu X, Qiu L, Liu D, et al. Hydroxychloroquine treatment in  
6 COVID- 19: A descriptive observational analysis of 30 cases from a single center in  
7 Wuhan, China. *Journal of Medical Virology*. 2020;92(11):2523-7.
- 8 587. Yadegarinia D, Tehrani S, Abolghasemi S, Zarghi A, Sali S, Zolfaghari F. Evaluation  
9 of the efficacy of arbidol in comparison with the standard treatment regimen of  
10 hospitalized patients with Covid-19: a randomized clinical trial. *Archives of Clinical  
11 Infectious Diseases*. 2020;15(5).
- 12 588. Yan D, Liu X-Y, Zhu Y-n, Huang L, Dan B-t, Zhang G-j, et al. Factors associated  
13 with prolonged viral shedding and impact of lopinavir/ritonavir treatment in  
14 hospitalised non-critically ill patients with SARS-CoV-2 infection. *European  
15 Respiratory Journal*. 2020;56(1).
- 16 589. Ye X, Luo Y, Xia S, Sun Q, Ding J, Zhou Y, et al. Clinical efficacy of  
17 lopinavir/ritonavir in the treatment of Coronavirus disease 2019. *Eur Rev Med  
18 Pharmacol Sci*. 2020;24(6):3390-6.
- 19 590. Yormaz B, Ergün D, Tülek B, Ergün R, Arslan U, Kanat F. Impact of low molecular  
20 weight heparin administration on the clinical course of the COVID-19 disease.  
21 *Turkish journal of medical sciences*. 2021;51(1):28-38.
- 22 591. You X, Wu C-h, Fu Y-n, He Z, Huang P-f, Chen G-p, et al. The use of  
23 methylprednisolone in COVID-19 patients: A propensity score matched retrospective  
24 cohort study. *PloS one*. 2020;15(12):e0244128.
- 25 592. Yu B, Gutierrez VP, Carlos A, Hoge G, Pillai A, Kelly JD, et al. Empiric use of  
26 anticoagulation in hospitalized patients with COVID-19: a propensity score-matched  
27 study of risks and benefits. *Biomarker research*. 2021;9(1):1-11.
- 28 593. Yu B, Li C, Chen P, Zhou N, Wang L, Li J, et al. Low dose of hydroxychloroquine  
29 reduces fatality of critically ill patients with COVID-19. *Science China Life Sciences*.  
30 2020;63(10):1515-21.
- 31 594. Yu J, Lu X, Tong L, Shi X, Ma J, Lv F, et al. Interferon-  $\alpha$ - 2b Aerosol Inhalation is  
32 Associated with Improved Clinical Outcomes in Patients with Coronavirus Disease-  
33 2019. *British Journal of Clinical Pharmacology*. 2021.
- 34 595. Yu T, Tian C, Chu S, Zhou H, Zhang Z, Luo S, et al. COVID- 19 patients benefit  
35 from early antiviral treatment: A comparative, retrospective study. *Journal of Medical  
36 Virology*. 2020;92(11):2675-83.
- 37 596. Yuan M, Xu X, Xia D, Tao Z, Yin W, Tan W, et al. Effects of corticosteroid  
38 treatment for non-severe COVID-19 pneumonia: a propensity score-based analysis.  
39 *Shock*. 2020;54(5):638-43.
- 40 597. Zambrano GMT, Rivero RA, Valverde CV, Carmenate YV. Features and outcomes  
41 of secondary sepsis and urinary tract infections in COVID-19 patients treated with  
42 stem cell nebulization. *medRxiv*. 2020.
- 43 598. Zambrano GMT, Valverde CAV, Hernandez AB, Hadi LA, Rivero RA, Carmenate  
44 YV. Renal Involvement in Patients with COVID-19 Pneumonia and Outcomes After  
45 Stem Cell Nebulization. *medRxiv*. 2020.
- 46 599. Zantah M, Castillo ED, Gangemi AJ, Patel M, Chowdhury J, Verga S, et al. Anakinra  
47 and intravenous IgG versus tocilizumab in the treatment of COVID-19 pneumonia.  
48 *medRxiv*. 2020.
- 49  
50  
51  
52  
53  
54  
55  
56  
57  
58  
59  
60

**Comparative-effectiveness research of COVID-19 treatment: A rapid scoping review**

600. Zarychanski R, Investigators A. Therapeutic anticoagulation in critically ill patients with Covid-19—preliminary report. medRxiv. 2021.
601. Zha L, Li S, Pan L, Tefsen B, Li Y, French N, et al. Corticosteroid treatment of patients with coronavirus disease 2019 (COVID- 19). *Medical Journal of Australia*. 2020;212(9):416-20.
602. Zha L, Li S, Pan L, Tefsen B, Li Y, French N, et al. Corticosteroid treatment of patients with coronavirus disease 2019 (COVID- 19). *Medical Journal of Australia*. 2020;212(9):416-20.
603. Zhang C, Jin H, Wen Y, Yin G. A systematic review and network meta-analysis for COVID-19 treatments. *MedRxiv*. 2020.
604. Zhang X-J, Qin J-J, Cheng X, Shen L, Zhao Y-C, Yuan Y, et al. In-hospital use of statins is associated with a reduced risk of mortality among individuals with COVID-19. *Cell metabolism*. 2020;32(2):176-87. e4.
605. Zhao B, Liu M, Liu P, Peng Y, Huang J, Li M, et al. High Dose Intravenous Vitamin C for Preventing The Disease Aggravation of Moderate COVID-19 Pneumonia. A Retrospective Propensity Matched Before-After Study. *Frontiers in pharmacology*. 2021;12:519.
606. Zhao H, Zhang C, Zhu Q, Chen X, Chen G, Sun W, et al. Favipiravir in the treatment of patients with SARS-CoV-2 RNA recurrent positive after discharge: A multicenter, open-label, randomized trial. *International immunopharmacology*. 2021;97:107702.
607. Zhao H, Zhu Q, Zhang C, Li J, Wei M, Qin Y, et al. Tocilizumab combined with favipiravir in the treatment of COVID-19: A multicenter trial in a small sample size. *Biomedicine & Pharmacotherapy*. 2021;133:110825.
608. Zheng F, Zhou Y, Zhou Z, Ye F, Huang B, Huang Y, et al. SARS-CoV-2 clearance in COVID-19 patients with Novaferon treatment: A randomized, open-label, parallel-group trial. *International Journal of Infectious Diseases*. 2020;99:84-91.
609. Zheng K-L, Xu Y, Guo Y-F, Diao L, Kong X-Y, Wan X-J, et al. Efficacy and safety of tocilizumab in COVID-19 patients. *Aging (Albany NY)*. 2020;12(19):18878.
610. Zhu M-E, Wang Q, Zhou S, Wang B, Ke L, He P. Recombinant interleukin-2 stimulates lymphocyte recovery in patients with severe COVID-19. *Experimental and Therapeutic Medicine*. 2021;21(3):1-.

**Comparative-effectiveness research of COVID-19 treatment: A rapid scoping review**

## Appendix 5. List of included knowledge syntheses.

1. Abdelrahman, Z., et al., Evaluation of the current therapeutic approaches for COVID-19: a systematic review and a meta-analysis. *Frontiers in pharmacology*, 2021. 12: p. 30.
2. Abdulrahman, B., et al., Tocilizumab Effect in COVID-19 Hospitalized Patients: A Systematic Review and Meta-Analysis of Randomized Control Trials. *medRxiv*, 2021.
3. Abeldaño Zuñiga, R.A., et al., Clinical effectiveness of drugs in hospitalized patients with COVID-19: a systematic review and meta-analysis. *Therapeutic advances in respiratory disease*, 2021. 15: p. 17534666211007214.
4. Abubakar, A.R., et al., Systematic review on the therapeutic options for COVID-19: clinical evidence of drug efficacy and implications. *Infection and drug resistance*, 2020. 13: p. 4673.
5. Agstam, S., et al., Hydroxychloroquine and QTc prolongation in patients with COVID-19: a systematic review and meta-analysis. *Indian Pacing and Electrophysiology Journal*, 2021. 21(1): p. 36-43.
6. Ahmad, A., M. Salsabil, and T. Oliver, Mortality rates in matched cohort, pseudo-randomised and randomised trials of convalescent plasma given to COVID-19 patients. *medRxiv*, 2020.
7. Alexander, P.E., et al., Remdesivir use in patients with coronavirus COVID-19 disease: a systematic review and meta-analysis. *MedRxiv*, 2020.
8. Alhumaid, S., et al., Efficacy and safety of lopinavir/ritonavir for treatment of COVID-19: a systematic review and meta-analysis. *Tropical medicine and infectious disease*, 2020. 5(4): p. 180.
9. Ali, S., et al., Differential effect of corticosteroid treatment on Influenza, SARS, MERS, and SARS-CoV-2 patients: A meta-analysis and systematic review. *medRxiv*, 2021.
10. Alzghari, S.K. and V.S. Acuña, Supportive treatment with tocilizumab for COVID-19: a systematic review. *Journal of Clinical Virology*, 2020. 127: p. 104380.
11. Amani, B., A. Khanijahani, and B. Amani, Hydroxychloroquine plus standard of care compared with standard of care alone in COVID-19: a meta-analysis of randomized controlled trials. *Scientific Reports*, 2021. 11(1): p. 1-10.
12. Antwi- Amoabeng, D., et al., Clinical outcomes in COVID- 19 patients treated with tocilizumab: An individual patient data systematic review. *Journal of medical virology*, 2020. 92(11): p. 2516-2522.
13. Aviani, J.K., et al., Current views on the potentials of convalescent plasma therapy (CPT) as Coronavirus disease 2019 (COVID- 19) treatment: A systematic review and meta- analysis based on recent studies and previous respiratory pandemics. *Reviews in medical virology*, 2021.
14. Axfors, C., et al., Mortality outcomes with hydroxychloroquine and chloroquine in COVID-19 from an international collaborative meta-analysis of randomized trials. *Nature communications*, 2021. 12(1): p. 1-13.
15. Aziz, M., et al., Efficacy of tocilizumab in COVID- 19: a systematic review and meta- analysis. *Journal of Medical Virology*, 2021. 93(3): p. 1620-1630.

**Comparative-effectiveness research of COVID-19 treatment: A rapid scoping review**

16. Bakhtawar, N., M. Usman, and M.M.U. Khan, Convalescent plasma therapy and its effects on COVID-19 patient outcomes: a systematic review of current literature. *Cureus*, 2020. 12(8).
17. Baladia, E., et al., Vitamin C for COVID-19: A living systematic review. *Medwave*, 2020. 20(6).
18. Bansal, V., et al., Mortality benefit of remdesivir in COVID-19: a systematic review and meta-analysis. *Frontiers in medicine*, 2020. 7.
19. Barboza, J.J., et al., Assessment and management of asymptomatic COVID-19 infection: A Systematic Review. *Travel medicine and infectious disease*, 2021: p. 102058.
20. Barkas, F., et al., Anakinra in hospitalized non-intubated patients with coronavirus disease 2019: a systematic review and meta-analysis. *Rheumatology (Oxford, England)*, 2021.
21. Baroutjian, A., et al., SARS-CoV-2 pharmacologic therapies and their safety/effectiveness according to level of evidence. *The American Journal of Emergency Medicine*, 2020.
22. Barreira, D.F., et al., Assessment of the safety and therapeutic benefits of convalescent plasma in COVID-19 treatment: a systematic review and meta-analysis. *Frontiers in medicine*, 2021. 8.
23. Barzkar, F., et al., Efficacy and safety of chloroquine and hydroxychloroquine for COVID-19: A comprehensive evidence synthesis of clinical, animal, and in vitro studies. *Medical Journal of the Islamic Republic of Iran*, 2020. 34: p. 171.
24. Bassatne, A., et al., The link between COVID-19 and Vitamin D (VIVID): a systematic review and meta-analysis. *Metabolism*, 2021: p. 154753.
25. Bhattacharyya, A., et al., Safety and efficacy of lopinavir/ritonavir combination in COVID-19: A systematic review, meta-analysis, and meta-regression analysis. *Indian journal of pharmacology*, 2020. 52(4): p. 313.
26. Bhowmick, S., et al., Safety and Efficacy of Ivermectin and Doxycycline Monotherapy and in Combination in the Treatment of COVID-19: A Scoping Review. *Drug safety*, 2021: p. 1-10.
27. Bignardi, P.R., et al., Use of hydroxychloroquine and chloroquine in patients with COVID-19: a meta-analysis of randomized clinical trials. *Pathogens and global health*, 2021. 115(3): p. 139-150.
28. Bokharee, N., et al., Pharmacological interventions for COVID-19: a systematic review of observational studies and clinical trials. *Expert Review of Anti-infective Therapy*, 2021(just-accepted).
29. Boregowda, U., et al., Addition of tocilizumab to the standard of care reduces mortality in severe COVID-19: a systematic review and meta-analysis. *Frontiers in medicine*, 2020. 7.
30. Budhathoki, P., et al., Is Hydroxychloroquine with Azithromycin a Good Combination in COVID-19 Compared to Hydroxychloroquine Alone from Cardiac Perspective? A Systematic Review and Meta-Analysis. *Journal of Nepal Health Research Council*, 2021. 19(1): p. 1-9.
31. Budhathoki, P., et al., Corticosteroids in COVID-19: Is it rational? A Systematic review and meta-analysis. *SN comprehensive clinical medicine*, 2020: p. 1-21.

**Comparative-effectiveness research of COVID-19 treatment: A rapid scoping review**

32. Cano, E.J., et al., Impact of corticosteroids in coronavirus disease 2019 outcomes: systematic review and meta-analysis. *Chest*, 2021. 159(3): p. 1019-1040.
33. Cantini, F., et al., Immune therapy, or antiviral therapy, or both for COVID-19: a systematic review. *Drugs*, 2020: p. 1-18.
34. Castañeda-Sabogal, A., et al., Outcomes of Ivermectin in the treatment of COVID-19: a systematic review and meta-analysis. *medRxiv*, 2021.
35. Celotto, S., et al., An umbrella review of systematic reviews with meta-analyses evaluating positive and negative outcomes of hydroxychloroquine and chloroquine therapy. *International Journal of Infectious Diseases*, 2020.
36. Chacko, J., G. Brar, and R. Premkumar, Hydroxychloroquine in COVID-19: an updated systematic review and meta-analysis. *Medrxiv*, 2020.
37. Chandrasekar, V.T., et al., A Systematic Review and Meta-analysis of Therapeutic options against SARS-CoV-2. *medRxiv*, 2020.
38. Chaudhuri, D., et al., Corticosteroids in COVID-19 and non-COVID-19 ARDS: a systematic review and meta-analysis. *Intensive care medicine*, 2021: p. 1-17.
39. Chen, C., et al., Safety of hydroxychloroquine in COVID-19 and other diseases: a systematic review and meta-analysis of 53 randomized trials. *European journal of clinical pharmacology*, 2021. 77(1): p. 13-24.
40. Chen, C.-x., et al., JAK-inhibitors for coronavirus disease-2019 (COVID-19): a meta-analysis. *Leukemia*, 2021: p. 1-5.
41. Chenchula, S., A. Ray, and B. Sadasivam, Famotidine Repurposing for Novel Corona Virus Disease of 2019: A Systematic Review. *Drug research*, 2021.
42. Cheng, W., et al., Efficacy and safety of corticosteroid treatment in patients with COVID-19: a systematic review and meta-analysis. *Frontiers in pharmacology*, 2020. 11: p. 1378.
43. Chiu, L., et al., Colchicine use in patients with COVID-19: A systematic review and meta-analysis. *MedRxiv*, 2021.
44. Chiu, L., et al., Effect of famotidine on hospitalized patients with COVID-19: A systematic review and meta-analysis. *PloS one*, 2021. 16(11): p. e0259514.
45. Chivese, T., et al., A meta-review of systematic reviews and an updated meta-analysis on the efficacy of chloroquine and hydroxychloroquine in treating COVID19 infection. *medRxiv*, 2020: p. 2020.07. 28.20164012.
46. Choudhuri, A.H., et al., The efficacy and safety of hydroxychloroquine (HCQ) in treatment of COVID19—a systematic review and meta-analysis. *Indian Journal of Medical Microbiology*, 2021.
47. Choupoo, N.S., et al., Evaluating the Efficacy and Safety of the Existing Repurposed Pharmacological Agents for Treating COVID-19: A Meta-analysis and Systematic Review of Clinical Trials. *Indian Journal of Critical Care Medicine: Peer-reviewed, Official Publication of Indian Society of Critical Care Medicine*, 2020. 24(11): p. 1106.
48. Cioca, G., et al., Immunosuppression drugs seize the overacting immune system by preventing the cytokine storm in covid-19 symptoms. *Systematic Reviews in Pharmacy*, 2021. 12(2).
49. Coomes, E.A. and H. Haghbayan, Interleukin- 6 in COVID- 19: a systematic review and meta- analysis. *Reviews in medical virology*, 2020. 30(6): p. 1-9.



**Comparative-effectiveness research of COVID-19 treatment: A rapid scoping review**

- 1
  - 2
  - 3
  - 4
  - 5
  - 6
  - 7
  - 8
  - 9
  - 10
  - 11
  - 12
  - 13
  - 14
  - 15
  - 16
  - 17
  - 18
  - 19
  - 20
  - 21
  - 22
  - 23
  - 24
  - 25
  - 26
  - 27
  - 28
  - 29
  - 30
  - 31
  - 32
  - 33
  - 34
  - 35
  - 36
  - 37
  - 38
  - 39
  - 40
  - 41
  - 42
  - 43
  - 44
  - 45
  - 46
  - 47
  - 48
  - 49
  - 50
  - 51
  - 52
  - 53
  - 54
  - 55
  - 56
  - 57
  - 58
  - 59
  - 60
  - 61
  - 62
  - 63
  - 64
  - 65
50. Cordeiro, L.P., et al., Perspectives on glucocorticoid treatment for COVID-19: a systematic review. *Pharmacological Reports*, 2021: p. 1-8.
51. Cortegiani, A., et al., Rationale and evidence on the use of tocilizumab in COVID-19: a systematic review. *Pulmonology*, 2021. 27(1): p. 52-66.
52. Cortegiani, A., et al., Update I. A systematic review on the efficacy and safety of chloroquine/hydroxychloroquine for COVID-19. *Journal of critical care*, 2020.
53. Das, R.R., et al., Efficacy and safety of anti-malarial drugs (chloroquine and hydroxychloroquine) in treatment of COVID-19 infection: a systematic review and meta-analysis. *Frontiers in medicine*, 2020. 7: p. 482.
54. Del Pozo, J.S.-G., et al., A systematic review on the efficacy and safety of IL-6 modulatory drugs in the treatment of COVID-19 patients. *Eur Rev Med Pharmacol Sci*, 2020. 24(13): p. 7475-7484.
55. Di Castelnuovo, A., et al., Low dose hydroxychloroquine is associated with lower mortality in COVID-19: a meta-analysis of 26 studies and 44,521 patients. *medRxiv*, 2020.
56. Diallo, A., et al., An updated systematic review and network meta-analysis of 25 randomized trials assessing the efficacy and safety of treatments in COVID-19 disease. *Journal of Public Health Research*, 2021. 10(1).
57. Diaz- Arocutipa, C., A. Brañez- Condorena, and A.V. Hernandez, QTc prolongation in COVID- 19 patients treated with hydroxychloroquine, chloroquine, azithromycin, or lopinavir/ritonavir: A systematic review and meta- analysis. *Pharmacoepidemiology and Drug Safety*, 2021. 30(6): p. 694-706.
58. Dong, Y., et al., Current COVID-19 treatments: Rapid review of the literature. *Journal of global health*, 2021. 11.
59. Ebina-Shibuya, R., et al., Hydroxychloroquine and chloroquine for treatment of coronavirus disease 19 (COVID-19): a systematic review and meta-analysis of randomized and non-randomized controlled trials. *Journal of Thoracic Disease*, 2021. 13(1): p. 202.
60. Elavarasi, A., et al., Chloroquine and hydroxychloroquine for the treatment of COVID-19: a systematic review and meta-analysis. *Journal of general internal medicine*, 2020: p. 1-7.
61. Elavarasi, A., et al., Anti-interleukin-6 therapies for Covid-19: A systematic review, critical appraisal and meta-analysis. *The National Medical Journal of India*, 2020. 33(3): p. 152.
62. Eljaaly, K., et al., Hydroxychloroquine safety: A meta-analysis of randomized controlled trials. *Travel medicine and infectious disease*, 2020. 36: p. 101812.
63. Elsawah, H.K., et al., Efficacy and safety of remdesivir in hospitalized Covid- 19 patients: systematic review and meta- analysis including network meta- analysis. *Reviews in medical virology*, 2021. 31(4): p. e2187.
64. Elsawah, H.K., et al., Hydroxychloroquine for treatment of nonsevere COVID- 19 patients: Systematic review and meta- analysis of controlled clinical trials. *Journal of medical virology*, 2021. 93(3): p. 1265-1275.
65. Eze, P., et al., Efficacy and safety of chloroquine and hydroxychloroquine for treatment of COVID-19 patients-a systematic review and meta-analysis of randomized controlled trials. *American journal of cardiovascular disease*, 2021. 11(1): p. 93.

**Comparative-effectiveness research of COVID-19 treatment: A rapid scoping review**

66. Fajgenbaum, D.C., et al., Treatments administered to the first 9152 reported cases of COVID-19: a systematic review. *Infectious diseases and therapy*, 2020. 9: p. 435-449.
67. Fiolet, T., et al., Effect of hydroxychloroquine with or without azithromycin on the mortality of coronavirus disease 2019 (COVID-19) patients: a systematic review and meta-analysis. *Clinical microbiology and infection*, 2021. 27(1): p. 19-27.
68. Flumignan, R.L., et al., Prophylactic anticoagulants for people hospitalised with COVID- 19. *Cochrane Database of Systematic Reviews*, 2020(10).
69. Ford, N., et al., Systematic review of the efficacy and safety of antiretroviral drugs against SARS, MERS or COVID- 19: initial assessment. *Journal of the International AIDS Society*, 2020. 23(4): p. e25489.
70. Gbinigie, K. and K. Frie, Should azithromycin be used to treat COVID-19? A rapid review. *BJGP open*, 2020. 4(2).
71. Gbinigie, K. and K. Frie, Should chloroquine and hydroxychloroquine be used to treat COVID-19? A rapid review. *BJGP open*, 2020. 4(2).
72. Ghazy, R.M., et al., A systematic review and meta-analysis on chloroquine and hydroxychloroquine as monotherapy or combined with azithromycin in COVID-19 treatment. *Scientific reports*, 2020. 10(1): p. 1-18.
73. Ghazy, R.M., et al., Effectiveness and Safety of Chloroquine or Hydroxychloroquine as a mono-therapy or in combination with Azithromycin in the treatment of COVID-19 patients: Systematic Review and Meta-Analysis. *medRxiv*, 2020.
74. Ghosn, L., et al., Interleukin- 6 blocking agents for treating COVID- 19: a living systematic review. *Cochrane Database of Systematic Reviews*, 2021(3).
75. Gupta, I., et al., 144: Clinical Outcomes of Remdesivir in COVID-19: A Systematic Review and Meta-Analysis. *Critical Care Medicine*, 2021. 49(1): p. 57.
76. Halpin, D.M., D. Singh, and R.M. Hadfield, Inhaled corticosteroids and COVID-19: a systematic review and clinical perspective. *European Respiratory Journal*, 2020. 55(5).
77. Han, Q., et al., Current evidence of interleukin-6 signaling inhibitors in patients with COVID-19: a systematic review and meta-analysis. *Frontiers in pharmacology*, 2020. 11: p. 2119.
78. Hariyanto, T.I., et al., Colchicine treatment can improve outcomes of coronavirus disease 2019 (COVID- 19): a systematic review and meta- analysis. *Clinical and Experimental Pharmacology and Physiology*, 2021. 48(6): p. 823-830.
79. Hariyanto, T.I., W. Hardyson, and A. Kurniawan, Efficacy and safety of tocilizumab for coronavirus disease 2019 (Covid-19) patients: a systematic review and meta-analysis. *Drug Research*, 2021.
80. Hasan, S.S., et al., Mortality in COVID-19 patients with acute respiratory distress syndrome and corticosteroids use: a systematic review and meta-analysis. *Expert review of respiratory medicine*, 2020. 14(11): p. 1149-1163.
81. Hasan, S.S., et al., Does methylprednisolone reduce the mortality risk in hospitalized COVID-19 patients? A meta-analysis of randomized control trials. *Expert review of respiratory medicine*, 2021(just-accepted).
82. Hasan, S.S., et al., Venous thromboembolism in critically ill COVID-19 patients receiving prophylactic or therapeutic anticoagulation: a systematic review and meta-analysis. *Journal of thrombosis and thrombolysis*, 2020. 50(4): p. 814-821.

**Comparative-effectiveness research of COVID-19 treatment: A rapid scoping review**

- 1
- 2
- 3
- 4 83. Hassanipour, S., et al., The efficacy and safety of Favipiravir in treatment of COVID-
- 5 19: A systematic review and meta-analysis of clinical trials. *Scientific reports*, 2021.
- 6 11(1): p. 1-11.
- 7 84. Hernandez, A.V., et al., Hydroxychloroquine or chloroquine for treatment or
- 8 prophylaxis of COVID-19: a living systematic review. *Annals of internal medicine*,
- 9 2020. 173(4): p. 287-296.
- 10 85. Hill, T., et al., Comprehensive Systematic Review to Identify putative COVID-19
- 11 Treatments: Roles for Immunomodulator and Antiviral Treatments. *medRxiv*, 2020.
- 12 86. Ho, T.-C., et al., Chloroquine and Hydroxychloroquine: Efficacy in the Treatment of
- 13 the COVID-19. *Pathogens*, 2021. 10(2): p. 217.
- 14 87. Hong, T.S., et al., Impact of Hydroxychloroquine on Mortality in Hospitalized
- 15 Patients with COVID-19: Systematic Review and Meta-Analysis. *Pharmacy*, 2020.
- 16 8(4): p. 208.
- 17 88. Huang, D., et al., Efficacy and safety of umifenovir for coronavirus disease 2019
- 18 (COVID- 19): A systematic review and meta- analysis. *Journal of medical virology*,
- 19 2021. 93(1): p. 481-490.
- 20 89. Hussain, N., et al., A Meta-Analysis on the Effects of Hydroxychloroquine on
- 21 COVID-19. *Cureus*, 2020. 12(8).
- 22 90. Hussain, N., et al., The effect of antivirals on COVID-19: A systematic review.
- 23 *Expert Review of Anti-infective Therapy*, 2021. 19(4): p. 473-486.
- 24 91. Hussain, S., et al., Efficacy of Tocilizumab in Covid 19: A metanalysis of case series
- 25 studies. 2020.
- 26 92. Ibekwe, T., P. Ibekwe, and E.A. Orimadegun, Third force in the treatment of COVID-
- 27 19: A systematic review and meta-analysis. *Annals of Medicine and Surgery*, 2021: p.
- 28 102218.
- 29 93. Jiang, W., et al., Clinical efficacy of convalescent plasma therapy on treating
- 30 COVID- 19 patients: Evidence from matched study and a meta- analysis. *Clinical*
- 31 *and translational medicine*, 2020. 10(8).
- 32 94. Jiang, Y., et al., Effectiveness of remdesivir for the treatment of hospitalized Covid-
- 33 19 persons: a network meta- analysis. *Journal of medical virology*, 2021. 93(2): p.
- 34 1171-1174.
- 35 95. Joseph, B.A., et al., Efficacy and safety of lopinavir/ritonavir in the treatment of
- 36 COVID-19: A systematic review. *Expert review of anti-infective therapy*, 2021.
- 37 19(6): p. 679-687.
- 38 96. Julia del Amo, M., Systematic review and meta-analysis of randomized trials of.
- 39 2021.
- 40 97. Juul, S., et al., Interventions for treatment of COVID-19: of a living systematic
- 41 review with meta-analyses and trial sequential analyses (The LIVING Project). *PloS*
- 42 *one*, 2021. 16(3): p. e0248132.
- 43 98. Kaka, A.S., et al., Major update: remdesivir for adults with COVID-19: a living
- 44 systematic review and meta-analysis for the American College of Physicians Practice
- 45 Points. *Annals of internal medicine*, 2021. 174(5): p. 663-672.
- 46 99. Kalfas, S., et al., The therapeutic potential of ivermectin for COVID-19: A review of
- 47 mechanisms and evidence. *medRxiv*, 2020.
- 48
- 49
- 50
- 51
- 52
- 53
- 54
- 55
- 56
- 57
- 58
- 59
- 60

**Comparative-effectiveness research of COVID-19 treatment: A rapid scoping review**

100. Kamel, A.M., et al., Anticoagulation outcomes in hospitalized Covid- 19 patients: A systematic review and meta- analysis of case- control and cohort studies. *Reviews in medical virology*, 2021. 31(3): p. e2180.
101. Karale, S., et al., A Meta-analysis of Mortality, Need for ICU admission, Use of Mechanical Ventilation and Adverse Effects with Ivermectin Use in COVID-19 Patients. *medRxiv*, 2021.
102. Kashour, Z., et al., Mortality, viral clearance, and other clinical outcomes of hydroxychloroquine in COVID- 19 Patients: A Systematic Review and Meta-Analysis of Randomized Controlled Trials. *Clinical and Translational Science*, 2021.
103. Kashour, Z., et al., Efficacy of chloroquine or hydroxychloroquine in COVID-19 patients: a systematic review and meta-analysis. *Journal of Antimicrobial Chemotherapy*, 2021. 76(1): p. 30-42.
104. Kaye, A.G. and R. Siegel, The efficacy of IL-6 inhibitor Tocilizumab in reducing severe COVID-19 mortality: a systematic review. *PeerJ*, 2020. 8: p. e10322.
105. Khalili, M., et al., Therapeutic interventions for COVID-19: a living overview of reviews. *Therapeutic Advances in Respiratory Disease*, 2020. 14: p. 1753466620976021.
106. Khan, F.A., et al., Systematic review and meta-analysis of anakinra, sarilumab, siltuximab and tocilizumab for COVID-19. *Thorax*, 2021.
107. Khan, S., et al., The trade-off dilemma in pharmacotherapy of COVID-19: systematic review, meta-analysis, and implications. *Expert Opinion on Pharmacotherapy*, 2020. 21(15): p. 1821-1849.
108. Khodashahi, R., et al., Effectiveness of antiviral and immunomodulatory agents in the treatment of covid-19: A systematic review. *Current Respiratory Medicine Reviews*, 2020. 16(3): p. 165-183.
109. Kim, M.S., et al., Comparative efficacy and safety of pharmacological interventions for the treatment of COVID-19: A systematic review and network meta-analysis. *PLoS medicine*, 2020. 17(12): p. e1003501.
110. Klassen, S.A., et al. The effect of convalescent plasma therapy on COVID-19 patient mortality: systematic review and Meta-analysis. in *Mayo Clinic Proceedings*. 2021. Elsevier.
111. Kotak, S., et al., Use of tocilizumab in COVID-19: a systematic review and meta-analysis of current evidence. *Cureus*, 2020. 12(10).
112. Kotecha, P., et al., Repurposing of drugs for Covid-19: a systematic review and meta-analysis. *MedRxiv*, 2020.
113. Kow, C.S., M. Aldeyab, and S.S. Hasan, Effect of remdesivir on mortality in patients with COVID- 19: A meta- analysis of randomized control trials. *Journal of Medical Virology*, 2021. 93(4): p. 1860-1861.
114. Kow, C.S., I.A.S. Burud, and S.S. Hasan. Use of Famotidine and Risk of Severe Course of Illness in Patients With COVID-19: A Meta-analysis. in *Mayo Clinic Proceedings*. 2021. Elsevier.
115. Kow, C.S. and S.S. Hasan, Meta-analysis of effect of statins in patients with COVID-19. *American Journal of Cardiology*, 2020. 134: p. 153-155.
116. Kow, C.S. and S.S. Hasan, A meta-analysis on the preadmission use of DPP-4 inhibitors and risk of a fatal or severe course of illness in patients with COVID-19. *Therapie*, 2020.

**Comparative-effectiveness research of COVID-19 treatment: A rapid scoping review**

117. Kow, C.S. and S.S. Hasan, Preadmission use of inhaled corticosteroids and risk of fatal or severe COVID-19: a meta-analysis. *Journal of Asthma*, 2021: p. 1-4.
118. Kumar, J., et al., Efficacy and safety of hydroxychloroquine/chloroquine against SARS-CoV-2 infection: a systematic review and meta-analysis. *Journal of Infection and Chemotherapy*, 2021.
119. Kyriazopoulou, E., et al., Effect of anakinra on mortality in COVID-19: a patient level meta-analysis. *medRxiv*, 2021.
120. Lai, C.-C., et al., Clinical efficacy and safety of remdesivir in patients with COVID-19: a systematic review and network meta-analysis of randomized controlled trials. *Journal of Antimicrobial Chemotherapy*, 2021.
121. Lan, S.-H., et al., Tocilizumab for severe COVID-19: a systematic review and meta-analysis. *International journal of antimicrobial agents*, 2020. 56(3): p. 106103.
122. Lazaridis, D., et al., The Impact of Anticoagulation on COVID-19 (SARS CoV-2) Patient Outcomes: A Systematic Review. *Journal of Pharmacy Practice*, 2021: p. 08971900211015055.
123. Lee, K.H., et al., Efficacy of corticosteroids in patients with SARS, MERS and COVID-19: a systematic review and meta-analysis. *Journal of clinical medicine*, 2020. 9(8): p. 2392.
124. Lepere, P., et al., COVID-19: Can early home treatment with Azithromycin alone or with Zinc help prevent hospitalisation, death, and long-COVID-19? A review. *medRxiv*, 2021: p. 2020.12. 29.20248975.
125. Li, H., et al., Impact of corticosteroid therapy on outcomes of persons with SARS-CoV-2, SARS-CoV, or MERS-CoV infection: a systematic review and meta-analysis. *Leukemia*, 2020. 34(6): p. 1503-1511.
126. Li, J., et al., Comparison of associations between glucocorticoids treatment and mortality in COVID-19 patients and SARS patients: a systematic review and meta-analysis. *Shock*, 2021.
127. Li, Y. and W. He, Comparative Efficacy and Safety of Current Drugs against COVID-19: a Systematic Review and Net-work Meta Analysis. *medRxiv*, 2020.
128. Liao, G., et al., A scoping review of registered clinical trials of cellular therapy for COVID-19 and a Framework for Accelerated Synthesis of Trial Evidence—FAST evidence. *Transfusion medicine reviews*, 2020. 34(3): p. 165-171.
129. Lima, W.G., et al., The potential of drug repositioning as a short-term strategy for the control and treatment of COVID-19 (SARS-CoV-2): a systematic review. *Archives of virology*, 2020. 165(8): p. 1729-1737.
130. Lin, W.-T., et al., The effect of tocilizumab on COVID-19 patient mortality: A systematic review and meta-analysis of randomized controlled trials. *International immunopharmacology*, 2021: p. 107602.
131. Liu, W., et al., Efficacy and safety of antiviral treatment for COVID-19 from evidence in studies of SARS-CoV-2 and other acute viral infections: a systematic review and meta-analysis. *Cmaj*, 2020. 192(27): p. E734-E744.
132. Lou, L., et al., The efficacy and safety of remdesivir in the treatment of patients with COVID-19: a systematic review and meta-analysis. *medRxiv*, 2021.
133. Lu, S., et al., Effectiveness and safety of glucocorticoids to treat COVID-19: a rapid review and meta-analysis. *Annals of translational medicine*, 2020. 8(10).

**Comparative-effectiveness research of COVID-19 treatment: A rapid scoping review**

134. Lu, Y.-f., et al., A meta-analysis of the incidence of venous thromboembolic events and impact of anticoagulation on mortality in patients with COVID-19. *International journal of infectious diseases*, 2020. 100: p. 34-41.
135. Ma, S., et al., Efficacy and safety of systematic corticosteroids among severe COVID-19 patients: a systematic review and meta-analysis of randomized controlled trials. *Signal transduction and targeted therapy*, 2021. 6(1): p. 1-7.
136. Mackey, K., et al., Risks and impact of angiotensin-converting enzyme inhibitors or angiotensin-receptor blockers on SARS-CoV-2 infection in adults: a living systematic review. *Annals of internal medicine*, 2020. 173(3): p. 195-203.
137. Mahendiratta, S., et al., Stem cell therapy in COVID-19: Pooled evidence from SARS-CoV-2, SARS-CoV, MERS-CoV and ARDS: A systematic review. *Biomedicine & Pharmacotherapy*, 2021: p. 111300.
138. Mahmud, S., et al., 140: Efficacy and Safety of Tocilizumab in Hospitalized COVID-19 Patients: A Systematic Review. *Critical Care Medicine*, 2021. 49(1): p. 55.
139. Malaty, M., et al., Incidence and treatment of arrhythmias secondary to coronavirus infection in humans: a systematic review. *European Journal of Clinical Investigation*, 2021. 51(2): p. e13428.
140. Maldonado, E., D. Tao, and K. Mackey, Antithrombotic therapies in COVID-19 disease: a systematic review. *Journal of general internal medicine*, 2020: p. 1-9.
141. Malgie, J., J.W. Schoones, and B.G. Pijls, Decreased mortality in coronavirus disease 2019 patients treated with tocilizumab: a rapid systematic review and meta-analysis of observational studies. *Clinical Infectious Diseases*, 2021. 72(11): p. e742-e749.
142. Mansourabadi, A.H., et al., The immune system as a target for therapy of SARS-CoV-2: a systematic review of the current immunotherapies for COVID-19. *Life sciences*, 2020: p. 118185.
143. Maraolo, A.E. and A. Grossi, Safety of hydroxychloroquine for treatment or prevention of SARS-CoV-2 infection: A rapid systematic review and meta-analysis of randomized clinical trials. *Immunity, inflammation and disease*, 2021. 9(1): p. 31-36.
144. Mareev, V.Y., et al., Steroid pulse-therapy in patients With coronAvirus Pneumonia (COVID-19), sYstemic inFLammation And Risk of vEnous thRombosis and thromboembolism (WAYFARER Study). *Kardiologija*, 2020. 60(6): p. 15-29.
145. Matli, K., et al., Role of combining anticoagulant and antiplatelet agents in COVID-19 treatment: a rapid review. *Open heart*, 2021. 8(1): p. e001628.
146. Mehra, I., et al., 146: Controversial Role of Corticosteroids on Mortality in COVID-19: Systematic Review and Meta-Analysis. *Critical Care Medicine*, 2021. 49(1): p. 58.
147. Meyerowitz, E.A., et al., Immunomodulation as Treatment for Severe Coronavirus Disease 2019: A Systematic Review of Current Modalities and Future Directions. *Clinical Infectious Diseases*, 2021. 72(12): p. e1130-e1143.
148. Meza, N., et al., Angiotensin-converting-enzyme inhibitors and angiotensin II receptor blockers for COVID-19: A living systematic review of randomized clinical trials. *Medwave*, 2021. 21(02).
149. Million, M., et al., Clinical efficacy of chloroquine derivatives in COVID-19 infection: comparative meta-analysis between the big data and the real world. *New microbes and new infections*, 2020. 38: p. 100709.

**Comparative-effectiveness research of COVID-19 treatment: A rapid scoping review**

150. Misra, S., et al., Efficacy of various treatment modalities for nCoV- 2019: A systematic review and meta- analysis. *European Journal of Clinical Investigation*, 2020. 50(11): p. e13383.
151. Misra, S., et al., Effect of various treatment modalities on the novel coronavirus (nCoV-2019) infection in humans: a systematic review & meta-analysis. *medRxiv*, 2020.
152. Mohanty, R.R., et al., Repurposing Colchicine for the management of COVID-19: A systematic review and meta-analysis. *medRxiv*, 2021.
153. Moonla, C., et al., Anticoagulation and in-hospital mortality from coronavirus disease 2019: a systematic review and meta-analysis. *Clinical and Applied Thrombosis/Hemostasis*, 2021. 27: p. 10760296211008999.
154. Mori, H., et al., Diagnosis and treatment of disseminated intravascular coagulation in COVID-19 patients: a scoping review. *International Journal of Hematology*, 2021: p. 1-10.
155. Munir, M.A., et al., Effectiveness of the Use of Dexamethasone in Treatment of Coronavirus Infections: A Systematic Review. *Open Access Macedonian Journal of Medical Sciences*, 2020. 8(T1): p. 518-521.
156. Musa, A., et al., Remdesivir for the Treatment of COVID-19: A Systematic Review of the Literature. *Western Journal of Emergency Medicine*, 2020. 21(4): p. 737.
157. Nakhband, A., A. Fakhari, and H. Azizi, Interferon-beta offers promising avenues to COVID-19 treatment: a systematic review and meta-analysis of clinical trial studies. *Naunyn-schmiedeberg's Archives of Pharmacology*, 2021: p. 1-10.
158. Nasir, M., et al., Use of Remdesivir in the Management of COVID-19: A Systematic Review on Current Evidences. *Mymensingh medical journal: MMJ*, 2020. 29(2): p. 481-487.
159. Nikniaz, L., et al., The impact of vitamin D supplementation on mortality rate and clinical outcomes of COVID-19 patients: A systematic review and meta-analysis. *MedRxiv*, 2021.
160. Okoli, G.N., et al., Remdesivir for coronavirus disease 2019 (COVID-19): a systematic review with meta-analysis and trial sequential analysis of randomized controlled trials. *Infectious Diseases*, 2021: p. 1-9.
161. Onorato, D., et al. Protective effects of statins administration in European and North American patients infected with COVID-19: a meta-analysis. in *Seminars in Thrombosis and Hemostasis*. 2021. Thieme Medical Publishers, Inc.
162. Oscanoa, T.J., et al., Frequency of long QT in patients with SARS-CoV-2 infection treated with hydroxychloroquine: a meta-analysis. *International journal of antimicrobial agents*, 2020. 56(6): p. 106212.
163. Padhy, B.M., et al., Therapeutic potential of ivermectin as add on treatment in COVID 19: A systematic review and meta-analysis: Ivermectin in COVID-19: A meta-analysis. *Journal of Pharmacy & Pharmaceutical Sciences*, 2020. 23: p. 462-469.
164. Parisi, R., et al. Different Anticoagulant Regimens, Mortality, and Bleeding in Hospitalized Patients with COVID-19: A Systematic Review and an Updated Meta-Analysis. in *Seminars in Thrombosis and Hemostasis*. 2021. Thieme Medical Publishers, Inc.

**Comparative-effectiveness research of COVID-19 treatment: A rapid scoping review**

165. Pasin, L., et al., Anakinra for patients with COVID-19: a meta-analysis of non-randomized cohort studies. *European journal of internal medicine*, 2021. 86: p. 34-40.
166. Pasin, L., et al., Corticosteroids for patients with coronavirus disease 2019 (COVID-19) with different disease severity: a meta-analysis of randomized clinical trials. *Journal of cardiothoracic and vascular anesthesia*, 2021. 35(2): p. 578-584.
167. Patel, T.K., et al., Does adding of hydroxychloroquine to the standard care provide any benefit in reducing the mortality among COVID-19 patients?: a systematic review. *Journal of Neuroimmune Pharmacology*, 2020. 15: p. 350-358.
168. Patell, R., et al., Pharmacologic thromboprophylaxis and thrombosis in hospitalized patients with COVID-19: a pooled analysis. *Thrombosis and haemostasis*, 2021. 121(01): p. 076-085.
169. Pathak, S.K., et al., No benefit of hydroxychloroquine in COVID-19: results of systematic review and meta-analysis of randomized controlled trials". *Diabetes & Metabolic Syndrome: Clinical Research & Reviews*, 2020. 14(6): p. 1673-1680.
170. Pei, L., et al., Antiviral agents, glucocorticoids, antibiotics, and intravenous immunoglobulin usage in 1142 patients with coronavirus disease 2019: a systematic review and meta-analysis. *Polish archives of internal medicine*, 2020.
171. Peng, H.T., S.G. Rhind, and A. Beckett, Convalescent Plasma for the Prevention and Treatment of COVID-19: A Systematic Review and Quantitative Analysis. *JMIR public health and surveillance*, 2021. 7(4): p. e25500.
172. Permana, H., et al., In-hospital use of statins is associated with a reduced risk of mortality in coronavirus-2019 (COVID-19): systematic review and meta-analysis. *Pharmacological Reports*, 2021: p. 1-12.
173. Perveen, R., et al., Systematic review on current antiviral therapy in COVID-19 pandemic. *The Medical Journal of Malaysia*, 2020. 75(6): p. 710-716.
174. Piechotta, V., et al., Convalescent plasma or hyperimmune immunoglobulin for people with COVID- 19: a living systematic review. *Cochrane Database of Systematic Reviews*, 2021(5).
175. Pimenoff, V.N., M. Elfstrom, and J. Dillner, A systematic review of convalescent plasma treatment for COVID19. *medRxiv*, 2020.
176. Pimentel, J., et al., Clinical studies assessing the efficacy, effectiveness and safety of remdesivir in management of COVID- 19: A scoping review. *British journal of clinical pharmacology*, 2021. 87(7): p. 2663-2684.
177. Piscoya, A., et al., Efficacy and harms of remdesivir for the treatment of COVID-19: a systematic review and meta-analysis. *PloS one*, 2020. 15(12): p. e0243705.
178. Prakash, A., et al., Systematic review and meta-analysis of effectiveness and safety of favipiravir in the management of novel coronavirus (COVID-19) patients. *Indian Journal of Pharmacology*, 2020. 52(5): p. 414.
179. Prodromos, C.C., T. Rumschlag, and T. Perchyk, Hydroxychloroquine is protective to the heart, not harmful: a systematic review. *New microbes and new infections*, 2020. 37: p. 100747.
180. Putman, M., et al., Antirheumatic disease therapies for the treatment of covid- 19: a systematic review and meta- analysis. *Arthritis & Rheumatology*, 2021. 73(1): p. 36-47.
181. Qiu, R., et al., The therapeutic effect and safety of the drugs for COVID-19: a systematic review and meta-analysis. *Medicine*, 2021. 100(16).



**Comparative-effectiveness research of COVID-19 treatment: A rapid scoping review**

182. Qu, W., et al., Cell- based therapy to reduce mortality from COVID- 19: Systematic review and meta- analysis of human studies on acute respiratory distress syndrome. *Stem Cells Translational Medicine*, 2020. 9(9): p. 1007-1022.
183. Rada, G., J. Corbalán, and P. Rojas, Cell-based therapies for COVID-19: A living systematic review. *medRxiv*, 2020.
184. Rajendran, K., et al., Convalescent plasma transfusion for the treatment of COVID-19: Systematic review. *Journal of medical virology*, 2020. 92(9): p. 1475-1483.
185. Raju, R., V. Prajith, and P.S. Biatris, Therapeutic role of corticosteroids in COVID-19: a systematic review of registered clinical trials. *Future Journal of Pharmaceutical Sciences*, 2021. 7(1): p. 1-18.
186. Rakedzon, S., et al., Hydroxychloroquine and coronavirus disease 2019: a systematic review of a scientific failure. *Rambam Maimonides Medical Journal*, 2020. 11(3).
187. Rakhmat, I.I., et al., Dipeptidyl peptidase-4 (DPP-4) inhibitor and mortality in coronavirus disease 2019 (COVID-19)—A systematic review, meta-analysis, and meta-regression. *Diabetes & Metabolic Syndrome: Clinical Research & Reviews*, 2021.
188. Razmi, M., et al., Immunomodulatory-based therapy as a potential promising treatment strategy against severe COVID-19 patients: A systematic review. *International immunopharmacology*, 2020. 88: p. 106942.
189. Ren, L., et al., Assessment of Chloroquine and Hydroxychloroquine Safety Profiles: A Systematic Review and Meta-Analysis. *Frontiers in pharmacology*, 2020. 11.
190. Rezaei, S., et al., Efficacy and safety of Tocilizumab in severe and critical COVID-19: A Systematic Review and Meta-Analysis. *Expert review of clinical immunology*, 2021. 17(5): p. 499-511.
191. Rezagholizadeh, A., et al., Remdesivir for treatment of COVID-19; an updated systematic review and meta-analysis. *European journal of pharmacology*, 2021: p. 173926.
192. Robinson, R., et al., Impact of systemic corticosteroids on hospitalized patients with COVID-19: January 2021 Meta-analysis of randomized controlled trials. *medRxiv*, 2021.
193. Rodrigo, C., S.D. Fernando, and S. Rajapakse, Clinical evidence for repurposing chloroquine and hydroxychloroquine as antiviral agents: a systematic review. *Clinical Microbiology and Infection*, 2020. 26(8): p. 979-987.
194. Rodriguez-Guerra, M., P. Jadhav, and T.J. Vittorio, Current treatment in COVID-19 disease: a rapid review. *Drugs in Context*, 2021. 10.
195. Roshanshad, A., et al., Remdesivir efficacy in coronavirus disease 2019 (COVID-19): A systematic review. *medRxiv*, 2020.
196. Rubio-Rivas, M., et al., Beneficial and harmful outcomes of tocilizumab in severe COVID-19: a systematic review and meta-analysis. *medRxiv*, 2020.
197. Salah, H.M. and J.L. Mehta, Meta-Analysis of the Effect of Aspirin on Mortality in COVID-19. *American Journal of Cardiology*, 2021. 142: p. 158-159.
198. Salah, H.M. and J.L. Mehta, Meta-analysis of the Effect of Colchicine on Mortality and Mechanical Ventilation in COVID-19. *American Journal of Cardiology*, 2021. 145: p. 170-172.
199. Salah, H.M., et al., The effect of anticoagulation use on mortality in COVID-19 infection. *American Journal of Cardiology*, 2020. 134: p. 155-157.

**Comparative-effectiveness research of COVID-19 treatment: A rapid scoping review**

200. Sarfraz, A., et al., Randomized controlled trials of remdesivir in hospitalized coronavirus disease 2019 patients: A meta-analysis. *Turkish Journal of Emergency Medicine*, 2021. 21(2): p. 43.
201. Sarfraz, A., et al., Randomized Controlled Trials of Remdesivir in Hospitalized COVID-19 Patients: A Systematic Review and Meta-Analysis. *medRxiv*, 2020.
202. Sarfraz, A., et al., Tocilizumab and COVID-19: a meta-analysis of 2120 patients with severe disease and implications for clinical trial methodologies. *Turkish journal of medical sciences*, 2021. 51(3): p. 890-897.
203. Sarkar, S., P. Khanna, and K.D. Soni, Are the steroids a blanket solution for COVID- 19? A systematic review and meta- analysis. *Journal of Medical Virology*, 2021. 93(3): p. 1538-1547.
204. Sarkar, S., K.D. Soni, and P. Khanna, Convalescent plasma is a clutch at straws in COVID- 19 management! A systematic review and meta- analysis. *Journal of medical virology*, 2021. 93(2): p. 1111-1118.
205. Sarma, P., et al., Efficacy and safety of steroid therapy in COVID-19: A rapid systematic review and Meta-analysis. *Indian Journal of Pharmacology*, 2020. 52(6): p. 535.
206. Sarma, P., et al., Virological and clinical cure in COVID- 19 patients treated with hydroxychloroquine: a systematic review and meta- analysis. *Journal of medical virology*, 2020. 92(7): p. 776-785.
207. Schoot, T.S., et al., Immunosuppressive drugs and COVID-19: a review. *Frontiers in pharmacology*, 2020. 11: p. 1333.
208. Seirafianpour, F., et al., Treatment of COVID- 19 with pentoxifylline: Could it be a potential adjuvant therapy? *Dermatologic Therapy*, 2020. 33(4): p. e13733.
209. Selvaraj, V., et al., Tocilizumab in hospitalized patients with COVID-19: A meta analysis of randomized controlled trials. *Lung*, 2021: p. 1-10.
210. Sethia, R., et al., Efficacy of famotidine for COVID-19: a systematic review and meta-analysis. *medRxiv*, 2020.
211. Setyawat, T. and A.S. Nugraha, Effectiveness of Dexamethasone for Acute Respiratory Distress Syndrome (ARDS) due to Coronavirus: A Systematic Review. *European Journal of Molecular & Clinical Medicine*, 2020. 7(8): p. 206-211.
212. Shah, S., et al., Effects of Hydroxychloroquine With or Without Azithromycin on QT Interval in COVID-19: A Systematic Review. *Electrophysiology Collaborative Consortium for Meta-analysis—Electram Investigators. American Journal of Therapeutics*, 2021.
213. Shamshirian, A., et al., The role of hydroxychloroquine in COVID-19 treatment: a systematic review and meta-analysis. *Ann Acad Med Singap*, 2020. 49: p. 789-800.
214. Shao, S., et al., Effect of convalescent blood products for patients with severe acute respiratory infections of viral etiology: a systematic review and meta-analysis. *International Journal of Infectious Diseases*, 2021. 102: p. 397-411.
215. Shi, Q., et al., Potential effectiveness and safety of antiviral agents in children with coronavirus disease 2019: a rapid review and meta-analysis. *Annals of translational medicine*, 2020. 8(10).
216. Shrestha, D.B., et al., Favipiravir versus other antiviral or standard of care for COVID-19 treatment: a rapid systematic review and meta-analysis. *Virology journal*, 2020. 17(1): p. 1-15.

**Comparative-effectiveness research of COVID-19 treatment: A rapid scoping review**

217. Shrestha, D.B., et al., Remdesivir: a potential game-changer or just a myth? A systematic review and meta-analysis. *Life sciences*, 2021. 264: p. 118663.
218. Shuto, H., et al., A systematic review of corticosteroid treatment for noncritically ill patients with COVID-19. *Scientific reports*, 2020. 10(1): p. 1-8.
219. Siemieniuk, R.A., et al., Drug treatments for covid-19: living systematic review and network meta-analysis. *Bmj*, 2020. 370.
220. Simmons, B., et al., Sofosbuvir/daclatasvir regimens for the treatment of COVID-19: an individual patient data meta-analysis. *Journal of Antimicrobial Chemotherapy*, 2021. 76(2): p. 286-291.
221. Singh, A.K., et al., Role of corticosteroid in the management of COVID-19: A systemic review and a Clinician's perspective. *Diabetes & Metabolic Syndrome: Clinical Research & Reviews*, 2020. 14(5): p. 971-978.
222. Singh, A.K., et al., Remdesivir in COVID-19: a critical review of pharmacology, pre-clinical and clinical studies. *Diabetes & Metabolic Syndrome: Clinical Research & Reviews*, 2020. 14(4): p. 641-648.
223. Singh, A.K., et al., Hydroxychloroquine in patients with COVID-19: A Systematic Review and meta-analysis. *Diabetes & Metabolic Syndrome: Clinical Research & Reviews*, 2020. 14(4): p. 589-596.
224. Singh, B., et al., Chloroquine or hydroxychloroquine for prevention and treatment of COVID-19. *The Cochrane database of systematic reviews*, 2020. 2020(4).
225. Singh, S. and T.J. Moore, Efficacy and Safety of Hydroxychloroquine and Chloroquine for COVID-19: A systematic review. *medRxiv*, 2020.
226. Siordia, J.A., et al., Systematic and statistical review of coronavirus disease 19 treatment trials. *SN Comprehensive Clinical Medicine*, 2020: p. 1-12.
227. Sridharan, G.K., et al., Venous thromboembolism in hospitalized COVID-19 patients. *American Journal of Therapeutics*, 2020. 27(6): p. e599-e610.
228. Stack, M., et al., BTK inhibitors for Severe Acute Respiratory Syndrome Coronavirus 2 (SARS-CoV-2): A Systematic Review. *Research Square*, 2021: p. rs. 3. rs-319342.
229. Sterne, J.A., et al., Association between administration of systemic corticosteroids and mortality among critically ill patients with COVID-19: a meta-analysis. *Jama*, 2020. 324(13): p. 1330-1341.
230. Sun, C., et al., Does Famotidine reduce the risk of progression to severe disease, death, and intubation for COVID-19 patients? A systemic review and meta-analysis. *Digestive diseases and sciences*, 2021: p. 1-9.
231. Sun, M., et al., A potentially effective treatment for COVID-19: A systematic review and meta-analysis of convalescent plasma therapy in treating severe infectious disease. *International Journal of Infectious Diseases*, 2020. 98: p. 334-346.
232. Taher, M., N. Tik, and D. Susanti, Drugs intervention study in COVID-19 management. *Drug Metabolism and Personalized Therapy*, 2021. 36(2): p. 87-98.
233. Takla, M. and K. Jeevaratnam, Chloroquine, hydroxychloroquine, and COVID-19: systematic review and narrative synthesis of efficacy and safety. *Saudi Pharmaceutical Journal*, 2020.
234. Talaie, H., et al., Is there any potential management against COVID-19? A systematic review and meta-analysis. *DARU Journal of Pharmaceutical Sciences*, 2020: p. 1-13.
235. Talasaz, A.H., et al., Lipid-Modulating Agents for Prevention or Treatment of COVID-19 in Randomized Trials. *medRxiv*, 2021.

**Comparative-effectiveness research of COVID-19 treatment: A rapid scoping review**

236. Tharmarajah, E., et al., IL-6 inhibition in the treatment of COVID-19: A meta-analysis and meta-regression. *Journal of Infection*, 2021. 82(5): p. 178-185.
237. Thibault, F., et al., Hydroxychloroquine and mortality risk of patients with COVID-19: a systematic review and meta-analysis of human comparative studies. *medRxiv*, 2020.
238. Thoguluva Chandrasekar, V., et al., Systematic review and meta-analysis of effectiveness of treatment options against SARS-CoV-2 infection. *Journal of medical virology*, 2021. 93(2): p. 775-785.
239. Tlayjeh, H., et al., Efficacy of Corticosteroids in COVID-19 Patients: A Systematic Review and Meta-Analysis. *medRxiv*, 2020.
240. Tlayjeh, H., et al., Association of corticosteroids use and outcomes in COVID-19 patients: A systematic review and meta-analysis. *Journal of infection and public health*, 2020.
241. Tleyjeh, I.M., et al., Cardiac toxicity of chloroquine or hydroxychloroquine in patients with COVID-19: a systematic review and meta-regression analysis. *Mayo Clinic Proceedings: Innovations, Quality & Outcomes*, 2021. 5(1): p. 137-150.
242. Tleyjeh, I.M., et al., Efficacy and safety of tocilizumab in COVID-19 patients: a living systematic review and meta-analysis. *Clinical Microbiology and Infection*, 2021. 27(2): p. 215-227.
243. Torres, Z.A., et al., Safety and Efficacy of Antiviral Drugs for the Treatment of Patients with SARS-CoV-2 Infection: A Systematic Review and Meta-analyses. *medRxiv*, 2020.
244. Tritschler, T., et al., Anticoagulant interventions in hospitalized patients with COVID-19: A scoping review of randomized controlled trials and call for international collaboration. *Journal of thrombosis and haemostasis*, 2020. 18(11): p. 2958-2967.
245. Uaprasert, N., et al., Systemic coagulopathy in hospitalized patients with coronavirus disease 2019: A systematic review and meta-analysis. *Clinical and Applied Thrombosis/Hemostasis*, 2021. 27: p. 1076029620987629.
246. Ullah, W., et al., Safety and efficacy of hydroxychloroquine in COVID-19: a systematic review and meta-analysis. *Journal of clinical medicine research*, 2020. 12(8): p. 483.
247. Valk, S.J., et al., Convalescent plasma or hyperimmune immunoglobulin for people with COVID-19: a rapid review. *Cochrane Database of Systematic Reviews*, 2020(5).
248. van Paassen, J., et al., Corticosteroid use in COVID-19 patients: a systematic review and meta-analysis on clinical outcomes. *Critical Care*, 2020. 24(1): p. 1-22.
249. Vargas, M., G. Servillo, and S. Einav, Lopinavir/ritonavir for the treatment of SARS, MERS and COVID-19: a systematic review. *Eur Rev Med Pharmacol Sci*, 2020. 24(16): p. 8592-605.
250. Vegivinti, C.T.R., et al., Remdesivir therapy in patients with COVID-19: A systematic review and meta-analysis of randomized controlled trials. *Annals of Medicine and Surgery*, 2021.
251. Venkatesulu, B.P., et al., The mechanistic rationale of drugs, primary endpoints, geographical distribution of clinical trials against severe acute respiratory syndrome-

**Comparative-effectiveness research of COVID-19 treatment: A rapid scoping review**

- related coronavirus- 2: A systematic review. *Journal of medical virology*, 2021. 93(2): p. 843-853.
252. Verdugo-Paiva, F., et al., Remdesivir for the treatment of COVID-19: a living systematic review. *medRxiv*, 2020.
253. Veronese, N., et al., Use of corticosteroids in coronavirus disease 2019 pneumonia: a systematic review of the literature. *Frontiers in medicine*, 2020. 7: p. 170.
254. Viswanatha, G.L., C.K.A. Male, and H. Shylaja, Efficacy and safety of tocilizumab in the management of COVID-19: A systematic review and meta-analysis of observational studies. *medRxiv*, 2021.
255. Vrachatis, D.A., et al., Impact of colchicine on mortality in patients with COVID-19. A meta-analysis. *Hellenic Journal of Cardiology*, 2021.
256. Wadaa-Allah, A., et al., Efficacy of the current investigational drugs for the treatment of COVID-19: a scoping review. *Annals of medicine*, 2021. 53(1): p. 318-334.
257. Walz, L., et al., Janus kinase-inhibitor and type I interferon ability to produce favorable clinical outcomes in COVID-19 patients: a systematic review and meta-analysis. *MedRxiv*, 2020.
258. Walz, L., et al., JAK-inhibitor and type I interferon ability to produce favorable clinical outcomes in COVID-19 patients: a systematic review and meta-analysis. *BMC infectious diseases*, 2021. 21(1): p. 1-10.
259. Wang, D., et al., Tocilizumab in patients with moderate or severe COVID-19: a randomized, controlled, open-label, multicenter trial. *Frontiers of medicine*, 2021: p. 1-9.
260. Wang, M., et al., Evaluation of current medical approaches for COVID-19: a systematic review and meta-analysis. *BMJ Supportive & Palliative Care*, 2021. 11(1): p. 45-52.
261. Wang, Y., et al., Effect of antiplatelet treatments on patients with COVID-19 infection: A systematic review and meta-analysis. *The American journal of emergency medicine*, 2021.
262. Wang, Y., et al., Convalescent plasma may be a possible treatment for COVID-19: a systematic review. *International immunopharmacology*, 2021. 91: p. 107262.
263. Welte, T., et al., Current evidence for COVID-19 therapies: a systematic literature review. *European Respiratory Review*, 2021. 30(159).
264. Wenjing, L., et al., Safety and efficacy of convalescent plasma therapy in severely and critically ill patients with COVID-19: a systematic review with meta-analysis. *Aging (Albany NY)*, 2021. 13(1): p. 1498.
265. Wijaya, I., R. Andhika, and I. Huang, The use of therapeutic-dose anticoagulation and its effect on mortality in patients with COVID-19: a systematic review. *Clinical and Applied Thrombosis/Hemostasis*, 2020. 26: p. 1076029620960797.
266. Wijaya, I., et al., The use of Janus Kinase inhibitors in hospitalized patients with COVID-19: Systematic review and meta-analysis. *Clinical epidemiology and global health*, 2021: p. 100755.
267. Wilt, T.J., et al., Remdesivir for adults with COVID-19: a living systematic review for American College of Physicians practice points. *Annals of internal medicine*, 2021. 174(2): p. 209-220.
268. Wooding, D.J. and H. Bach, Treatment of COVID-19 with convalescent plasma: lessons from past coronavirus outbreaks. *Clinical Microbiology and Infection*, 2020.

**Comparative-effectiveness research of COVID-19 treatment: A rapid scoping review**

269. Wu, L., et al., Comprehensive evaluation of the efficacy and safety of LPV/r drugs in the treatment of SARS and MERS to provide potential treatment options for COVID-19. *Aging (Albany NY)*, 2021. 13(8): p. 10833.
270. Xu, J., et al., The effect of prior ACEI/ARB treatment on COVID-19 susceptibility and outcome: a systematic review and meta-analysis. *Clinical Infectious Diseases*, 2020.
271. Yamaji, N., et al., Current Evidence of the Pharmacological Treatments for Novel Coronavirus Disease 2019 (COVID-19) A Scoping Review. *medRxiv*, 2020.
272. Yang, J.-W., et al., Corticosteroid administration for viral pneumonia: COVID-19 and beyond. *Clinical Microbiology and Infection*, 2020. 26(9): p. 1171-1177.
273. Yang, T.-H., et al., Systematic review and meta-analysis of the effectiveness and safety of hydroxychloroquine in treating COVID-19 patients. *Journal of the Chinese Medical Association*, 2021. 84(2): p. 233-241.
274. Yang, Z., et al., The effect of corticosteroid treatment on patients with coronavirus infection: a systematic review and meta-analysis. *Journal of Infection*, 2020. 81(1): p. e13-e20.
275. Ye, Z., et al., Efficacy and safety of corticosteroids in COVID-19 based on evidence for COVID-19, other coronavirus infections, influenza, community-acquired pneumonia and acute respiratory distress syndrome: a systematic review and meta-analysis. *Cmaj*, 2020. 192(27): p. E756-E767.
276. Yokoyama, Y., et al., Effect of remdesivir on patients with COVID-19: A network meta-analysis of randomized control trials. *Virus research*, 2020. 288: p. 198137.
277. Yousefifard, M., et al., Corticosteroids on the management of coronavirus disease 2019 (COVID-19): a systemic review and meta-analysis. *Iranian Journal of Public Health*, 2020. 49(8): p. 1411.
278. Yousefifard, M., et al., Antiviral therapy in management of COVID-19: a systematic review on current evidence. *Archives of academic emergency medicine*, 2020. 8(1).
279. Yousefifard, M., et al., Non-steroidal anti-inflammatory drugs in management of COVID-19; a systematic review on current evidence. *International Journal of Clinical Practice*, 2020. 74(9): p. e13557.
280. Zaffanello, M., et al., The use of convalescent plasma for pediatric patients with SARS-CoV-2: A systematic literature review. *Transfusion and Apheresis Science*, 2020: p. 103043.
281. Zang, Y., et al., Hydroxychloroquine use and progression or prognosis of COVID-19: a systematic review and meta-analysis. *Naunyn-Schmiedeberg's archives of pharmacology*, 2021. 394(4): p. 775-782.
282. Zeng, J., et al., What convalescent plasma in treating severe acute respiratory infections of viral aetiology can hint for COVID-19? Evidence from a meta-analysis. *Transfusion Clinique et Biologique*, 2021.
283. Zhan, Y., et al., Efficacy of corticosteroid in patients with COVID-19: A multi-center retrospective study and meta-analysis. *Journal of Medical Virology*, 2021. 93(7): p. 4292-4302.
284. Zhang, C., et al., A systematic review and network meta-analysis for COVID-19 treatments. *MedRxiv*, 2020.
285. Zhang, J., et al., Effectiveness of intravenous immunoglobulin for children with severe COVID-19: a rapid review. *Annals of translational medicine*, 2020. 8(10).

**Comparative-effectiveness research of COVID-19 treatment: A rapid scoping review**

- 1  
2  
3 286. Zhang, X., et al., Convalescent plasma in the treatment of severe covid-19: A  
4 systematic review and meta-analysis. Iranian Journal of Public Health, 2020. 49(11):  
5 p. 2022.  
6  
7 287. Zhao, M., et al., Tocilizumab for treating COVID-19: a systemic review and meta-  
8 analysis of retrospective studies. European journal of clinical pharmacology, 2021.  
9 77(3): p. 311-319.  
10  
11 288. Zhong, H., et al., Efficacy and safety of current therapeutic options for COVID-19-  
12 lessons to be learnt from SARS and MERS epidemic: A systematic review and meta-  
13 analysis. Pharmacological research, 2020. 157: p. 104872.  
14  
15 289. Zuniga, R.A.A., et al., Clinical effectiveness of convalescent plasma in hospitalized  
16 patients with COVID-19: a systematic review and meta-analysis. medRxiv, 2021.  
17  
18  
19  
20  
21  
22  
23  
24  
25  
26  
27  
28  
29  
30  
31  
32  
33  
34  
35  
36  
37  
38  
39  
40  
41  
42  
43  
44  
45  
46  
47  
48  
49  
50  
51  
52  
53  
54  
55  
56  
57  
58  
59  
60

# Comparative-effectiveness research of COVID-19 treatment: A rapid scoping review

## Appendix 6. Additional details for the Results section

Figure A1. Word cloud of description of study participants

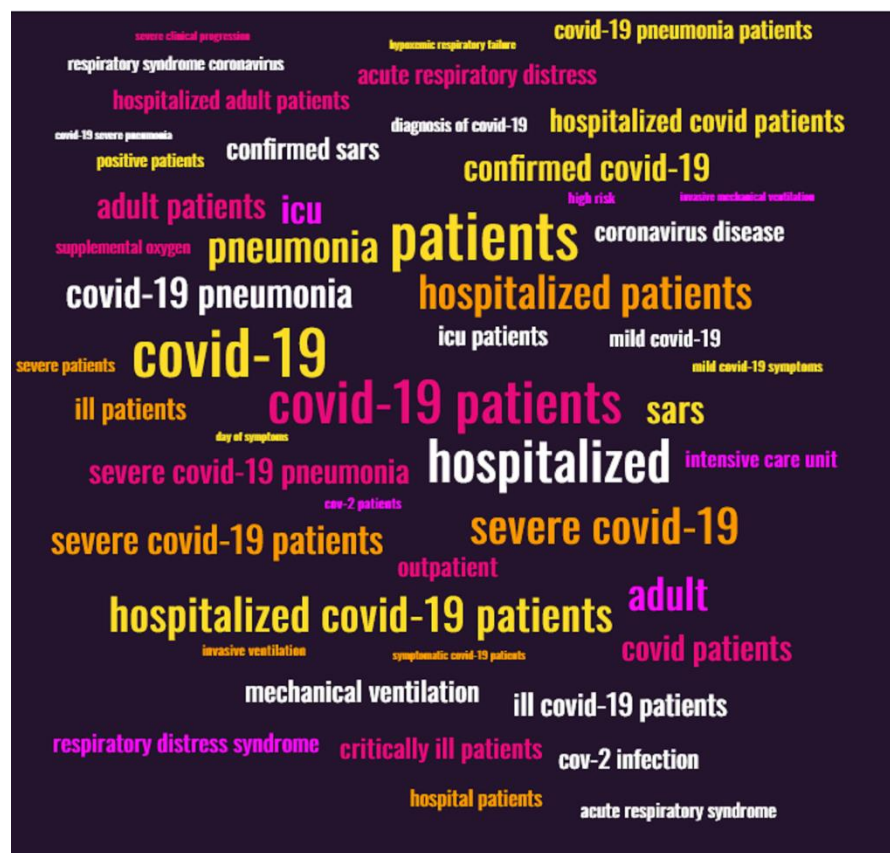



## Comparative-effectiveness research of COVID-19 treatment: A rapid scoping review

Table A1. Country of primary study conduct

| Country              | Total      | RCT        | Non-RCT    |
|----------------------|------------|------------|------------|
| <b>Total</b>         | <b>616</b> | <b>188</b> | <b>428</b> |
| USA                  | 161 (26)   | 37 (20)    | 124 (29)   |
| China                | 107 (17)   | 27 (14)    | 80 (19)    |
| Italy                | 47 (8)     | 2 (1)      | 45 (11)    |
| Spain                | 41 (7)     | 3 (2)      | 38 (9)     |
| France               | 39 (6)     | 5 (3)      | 34 (8)     |
| India                | 23 (4)     | 15 (8)     | 8 (2)      |
| Iran                 | 21 (3)     | 15 (8)     | 6 (1)      |
| United Kingdom       | 21 (3)     | 19 (10)    | 2 (0)      |
| Brazil               | 17 (3)     | 13 (7)     | 4 (1)      |
| Turkey               | 12 (2)     | 1 (1)      | 11 (3)     |
| Mexico               | 11 (2)     | 6 (3)      | 5 (1)      |
| Argentina            | 10 (2)     | 7 (4)      | 3 (1)      |
| The Netherlands      | 8 (1)      | 2 (1)      | 6 (1)      |
| Greece               | 6 (1)      | 2 (1)      | 4 (1)      |
| Pakistan             | 6 (1)      | 4 (2)      | 2 (0)      |
| Russia               | 6 (1)      | 1 (1)      | 5 (1)      |
| Belgium              | 5 (1)      | 1 (1)      | 4 (1)      |
| Egypt                | 5 (1)      | 4 (2)      | 1 (0)      |
| Saudi Arabia         | 5 (1)      | 0 (0)      | 5 (1)      |
| Bangladesh           | 4 (1)      | 2 (1)      | 2 (0)      |
| Singapore            | 4 (1)      | 0 (0)      | 4 (1)      |
| South Korea          | 4 (1)      | 0 (0)      | 4 (1)      |
| Bahrain              | 3 (0)      | 2 (1)      | 1 (0)      |
| Canada               | 3 (0)      | 3 (2)      | 0 (0)      |
| Denmark              | 3 (0)      | 2 (1)      | 1 (0)      |
| Germany              | 3 (0)      | 1 (1)      | 2 (0)      |
| Iraq                 | 3 (0)      | 2 (1)      | 1 (0)      |
| Oman                 | 3 (0)      | 1 (1)      | 2 (0)      |
| Poland               | 3 (0)      | 0 (0)      | 3 (1)      |
| United Arab Emirates | 3 (0)      | 0 (0)      | 3 (1)      |
| Austria              | 2 (0)      | 0 (0)      | 2 (0)      |
| Chile                | 2 (0)      | 2 (1)      | 0 (0)      |
| Cuba                 | 2 (0)      | 1 (1)      | 1 (0)      |
| Ireland              | 2 (0)      | 0 (0)      | 2 (0)      |
| Israel               | 2 (0)      | 0 (0)      | 2 (0)      |
| Qatar                | 2 (0)      | 1 (1)      | 1 (0)      |
| Sweden               | 2 (0)      | 0 (0)      | 2 (0)      |
| Australia            | 1 (0)      | 1 (1)      | 0 (0)      |
| Columbia             | 1 (0)      | 1 (1)      | 0 (0)      |
| Hong Kong            | 1 (0)      | 0 (0)      | 1 (0)      |
| Indonesia            | 1 (0)      | 1 (1)      | 0 (0)      |
| Kuwait               | 1 (0)      | 0 (0)      | 1 (0)      |
| Nigeria              | 1 (0)      | 1 (1)      | 0 (0)      |

## Comparative-effectiveness research of COVID-19 treatment: A rapid scoping review

| Country            | Total      | RCT        | Non-RCT    |
|--------------------|------------|------------|------------|
| <b>Total</b>       | <b>616</b> | <b>188</b> | <b>428</b> |
| Norway             | 1 (0)      | 1 (1)      | 0 (0)      |
| Peru               | 1 (0)      | 0 (0)      | 1 (0)      |
| Philippines        | 1 (0)      | 0 (0)      | 1 (0)      |
| Romania            | 1 (0)      | 0 (0)      | 1 (0)      |
| Suriname           | 1 (0)      | 0 (0)      | 1 (0)      |
| Switzerland        | 1 (0)      | 0 (0)      | 1 (0)      |
| Taiwan             | 1 (0)      | 1 (1)      | 0 (0)      |
| Thailand           | 1 (0)      | 0 (0)      | 1 (0)      |
| WHO - 30 countries | 1 (0)      | 1 (1)      | 0 (0)      |

Notes: Values are numbers of primary studies and related percentages.

## Comparative-effectiveness research of COVID-19 treatment: A rapid scoping review

Table A2. Treatment evaluated in primary studies

|                                 | <b>Total</b> | <b>RCT</b> | <b>Non-RCT</b> |
|---------------------------------|--------------|------------|----------------|
| <b>Total</b>                    | <b>630</b>   | <b>190</b> | <b>440</b>     |
| Tocilizumab                     | 87 (14%)     | 12 (6%)    | 75 (17%)       |
| Hydroxychloroquine              | 78 (12%)     | 22 (12%)   | 56 (13%)       |
| Convalescent Plasma             | 55 (9%)      | 15 (8%)    | 40 (9%)        |
| Steroid                         | 37 (6%)      | 1 (1%)     | 36 (8%)        |
| Lopinavir/Ritonavir             | 29 (5%)      | 5 (3%)     | 24 (5%)        |
| Methylprednisolone              | 26 (4%)      | 3 (2%)     | 23 (5%)        |
| Remdesivir                      | 25 (4%)      | 16 (8%)    | 9 (2%)         |
| Enoxaparin                      | 18 (3%)      | 1 (1%)     | 17 (4%)        |
| Hydroxychloroquine/Azithromycin | 18 (3%)      | 2 (1%)     | 16 (4%)        |
| Anakinra                        | 16 (3%)      | 2 (1%)     | 14 (3%)        |
| Dexamethasone                   | 16 (3%)      | 4 (2%)     | 12 (3%)        |
| Anticoagulant-Therapeutic       | 15 (2%)      | 2 (1%)     | 13 (3%)        |
| Azithromycin                    | 15 (2%)      | 6 (3%)     | 9 (2%)         |
| Anticoagulant-Prophylactic      | 11 (2%)      | 0 (0%)     | 11 (3%)        |
| Ivermectin                      | 11 (2%)      | 9 (5%)     | 2 (0%)         |
| Heparin                         | 9 (1%)       | 0 (0%)     | 9 (2%)         |
| Favipiravir                     | 8 (1%)       | 6 (3%)     | 2 (0%)         |
| Sarilumab                       | 8 (1%)       | 7 (4%)     | 1 (0%)         |
| Colchicine                      | 7 (1%)       | 4 (2%)     | 3 (1%)         |
| Glucocorticoids                 | 7 (1%)       | 0 (0%)     | 7 (2%)         |
| Bamlanivimab                    | 6 (1%)       | 4 (2%)     | 2 (0%)         |
| Chloroquine                     | 6 (1%)       | 2 (1%)     | 4 (1%)         |
| Intravenous Immunoglobulin      | 6 (1%)       | 4 (2%)     | 2 (0%)         |
| Mesenchymal Stem Cells          | 6 (1%)       | 4 (2%)     | 2 (0%)         |
| Steroid                         | 6 (1%)       | 0 (0%)     | 6 (1%)         |
| Thymosin-Alpha1                 | 6 (1%)       | 1 (1%)     | 5 (1%)         |

**Comparative-effectiveness research of COVID-19 treatment: A rapid scoping review**

|                                        | <b>Total</b> | <b>RCT</b> | <b>Non-RCT</b> |
|----------------------------------------|--------------|------------|----------------|
| <b>Total</b>                           | <b>630</b>   | <b>190</b> | <b>440</b>     |
| Vitamin C                              | 6 (1%)       | 4 (2%)     | 2 (0%)         |
| Antiviral                              | 5 (1%)       | 0 (0%)     | 5 (1%)         |
| Arbidol                                | 5 (1%)       | 2 (1%)     | 3 (1%)         |
| Aspirin                                | 5 (1%)       | 0 (0%)     | 5 (1%)         |
| Interferon                             | 5 (1%)       | 3 (2%)     | 2 (0%)         |
| Prednisone                             | 5 (1%)       | 1 (1%)     | 4 (1%)         |
| Statins                                | 5 (1%)       | 0 (0%)     | 5 (1%)         |
| Antibiotic                             | 4 (1%)       | 0 (0%)     | 4 (1%)         |
| Anticoagulant                          | 4 (1%)       | 0 (0%)     | 4 (1%)         |
| Hydrocortisone                         | 4 (1%)       | 2 (1%)     | 2 (0%)         |
| Lopinavir/Ritonavir/Hydroxychloroquine | 4 (1%)       | 0 (0%)     | 4 (1%)         |
| Ribavirin                              | 4 (1%)       | 0 (0%)     | 4 (1%)         |
| Therapeutic Plasma Exchange            | 4 (1%)       | 0 (0%)     | 4 (1%)         |
| Vitamin D                              | 4 (1%)       | 3 (2%)     | 1 (0%)         |
| Acei Arb                               | 3 (0%)       | 0 (0%)     | 3 (1%)         |
| Baricitinib                            | 3 (0%)       | 1 (1%)     | 2 (0%)         |
| Casirivimab/Imdevimab                  | 3 (0%)       | 2 (1%)     | 1 (0%)         |
| Famotidine                             | 3 (0%)       | 0 (0%)     | 3 (1%)         |
| Interferon-Alpha-2b                    | 3 (0%)       | 0 (0%)     | 3 (1%)         |
| Interferon Alpha-2b                    | 3 (0%)       | 1 (1%)     | 2 (0%)         |
| Lenzilumab                             | 3 (0%)       | 2 (1%)     | 1 (0%)         |
| Lopinavir/Ritonavir/Interferon-Alpha   | 3 (0%)       | 0 (0%)     | 3 (1%)         |
| Neutralizing Antibody                  | 3 (0%)       | 1 (1%)     | 2 (0%)         |
| Zinc Iv                                | 3 (0%)       | 3 (2%)     | 0 (0%)         |
| Acei Arb Statin                        | 2 (0%)       | 0 (0%)     | 2 (0%)         |
| Avifavir                               | 2 (0%)       | 2 (1%)     | 0 (0%)         |

## Comparative-effectiveness research of COVID-19 treatment: A rapid scoping review

|                                                  | <b>Total</b> | <b>RCT</b> | <b>Non-RCT</b> |
|--------------------------------------------------|--------------|------------|----------------|
| <b>Total</b>                                     | <b>630</b>   | <b>190</b> | <b>440</b>     |
| Canakinumab                                      | 2 (0%)       | 0 (0%)     | 2 (0%)         |
| Ceftriaxone                                      | 2 (0%)       | 0 (0%)     | 2 (0%)         |
| Chlorpromazine                                   | 2 (0%)       | 0 (0%)     | 2 (0%)         |
| Corticosteroids/Tocilizumab                      | 2 (0%)       | 0 (0%)     | 2 (0%)         |
| Darunavir/Cobicistat                             | 2 (0%)       | 1 (1%)     | 1 (0%)         |
| Fondaparinux                                     | 2 (0%)       | 0 (0%)     | 2 (0%)         |
| Functional Inhibition Of Acid Sphingomyelinase   | 2 (0%)       | 0 (0%)     | 2 (0%)         |
| Haloperidol                                      | 2 (0%)       | 0 (0%)     | 2 (0%)         |
| Heparin-Prophylaxis                              | 2 (0%)       | 0 (0%)     | 2 (0%)         |
| Inhaled Budesonide                               | 2 (0%)       | 2 (1%)     | 0 (0%)         |
| Interferon Beta-1b                               | 2 (0%)       | 0 (0%)     | 2 (0%)         |
| Interferon Kappa/Trefoil Factor 2                | 2 (0%)       | 2 (1%)     | 0 (0%)         |
| Interferon Lambda-1a                             | 2 (0%)       | 2 (1%)     | 0 (0%)         |
| Interlukin-6 Inhibitors                          | 2 (0%)       | 0 (0%)     | 2 (0%)         |
| Itolizumab                                       | 2 (0%)       | 2 (1%)     | 0 (0%)         |
| Ivermectin/Doxycycline                           | 2 (0%)       | 2 (1%)     | 0 (0%)         |
| Leflunomide                                      | 2 (0%)       | 0 (0%)     | 2 (0%)         |
| Lopinavir                                        | 2 (0%)       | 2 (1%)     | 0 (0%)         |
| Lopinavir/Ritonavir/Azithromycine                | 2 (0%)       | 2 (1%)     | 0 (0%)         |
| Lopinavir/Ritonavir/Doxycycline                  | 2 (0%)       | 2 (1%)     | 0 (0%)         |
| Lopinavir/Ritonavir/Ribavirin/Interferon Beta-1b | 2 (0%)       | 1 (1%)     | 1 (0%)         |
| Mavrilimumab                                     | 2 (0%)       | 1 (1%)     | 1 (0%)         |
| Methylprednisolone/Tocilizumab                   | 2 (0%)       | 0 (0%)     | 2 (0%)         |
| Neuromuscular Blocking Agents                    | 2 (0%)       | 0 (0%)     | 2 (0%)         |
| Nitazoxanide                                     | 2 (0%)       | 2 (1%)     | 0 (0%)         |
| Oseltamivir                                      | 2 (0%)       | 0 (0%)     | 2 (0%)         |

## Comparative-effectiveness research of COVID-19 treatment: A rapid scoping review

|                                                        | <b>Total</b> | <b>RCT</b> | <b>Non-RCT</b> |
|--------------------------------------------------------|--------------|------------|----------------|
| <b>Total</b>                                           | <b>630</b>   | <b>190</b> | <b>440</b>     |
| Prednisolone                                           | 2 (0%)       | 0 (0%)     | 2 (0%)         |
| Ribavirin/Interferon-Alpha                             | 2 (0%)       | 0 (0%)     | 2 (0%)         |
| Statin                                                 | 2 (0%)       | 0 (0%)     | 2 (0%)         |
| Stem Cell Nebulization                                 | 2 (0%)       | 0 (0%)     | 2 (0%)         |
| Steroid-Pulse                                          | 2 (0%)       | 0 (0%)     | 2 (0%)         |
| Tocilizumab/Methylprednisolone                         | 2 (0%)       | 0 (0%)     | 2 (0%)         |
| Tocilizumab/Steroid                                    | 2 (0%)       | 0 (0%)     | 2 (0%)         |
| Umifenovir                                             | 2 (0%)       | 0 (0%)     | 2 (0%)         |
| Vitamin C/Zinc                                         | 2 (0%)       | 2 (1%)     | 0 (0%)         |
| Acyclovir                                              | 1 (0%)       | 0 (0%)     | 1 (0%)         |
| Amantadine                                             | 1 (0%)       | 0 (0%)     | 1 (0%)         |
| Amoxicillin                                            | 1 (0%)       | 0 (0%)     | 1 (0%)         |
| Anakinra/Intravenous Immunoglobulin                    | 1 (0%)       | 0 (0%)     | 1 (0%)         |
| Anakinra/Methylprednisolone                            | 1 (0%)       | 0 (0%)     | 1 (0%)         |
| Antiviral/Antiviral/Antibiotics                        | 1 (0%)       | 0 (0%)     | 1 (0%)         |
| Apixaban-Prophylaxis                                   | 1 (0%)       | 0 (0%)     | 1 (0%)         |
| Apixaban-Therapeutic                                   | 1 (0%)       | 0 (0%)     | 1 (0%)         |
| Aprepitant                                             | 1 (0%)       | 1 (1%)     | 0 (0%)         |
| Arbidol/Hydroxychloroquine/Lopinavir/Ritonavir         | 1 (0%)       | 0 (0%)     | 1 (0%)         |
| Artemisinin-Piperaquine                                | 1 (0%)       | 0 (0%)     | 1 (0%)         |
| Auxora                                                 | 1 (0%)       | 1 (1%)     | 0 (0%)         |
| Azithromycin/Hydroxychloroquine                        | 1 (0%)       | 0 (0%)     | 1 (0%)         |
| Azithromycin/Prednisolone/Naproxen/Lopinavir/Ritonavir | 1 (0%)       | 0 (0%)     | 1 (0%)         |
| Azvudine                                               | 1 (0%)       | 1 (1%)     | 0 (0%)         |
| Bacillus Calmette–Guérin Vaccine                       | 1 (0%)       | 1 (1%)     | 0 (0%)         |
| Baloxavir Marboxil                                     | 1 (0%)       | 1 (1%)     | 0 (0%)         |

## Comparative-effectiveness research of COVID-19 treatment: A rapid scoping review

|                                                     | <b>Total</b> | <b>RCT</b> | <b>Non-RCT</b> |
|-----------------------------------------------------|--------------|------------|----------------|
| <b>Total</b>                                        | <b>630</b>   | <b>190</b> | <b>440</b>     |
| Bamlanivimab/Etesevimab                             | 1 (0%)       | 1 (1%)     | 0 (0%)         |
| Baricitinib/Remdesivir                              | 1 (0%)       | 1 (1%)     | 0 (0%)         |
| Berinerit                                           | 1 (0%)       | 0 (0%)     | 1 (0%)         |
| Betamethasone                                       | 1 (0%)       | 1 (1%)     | 0 (0%)         |
| Bevacizumab                                         | 1 (0%)       | 0 (0%)     | 1 (0%)         |
| Bromhexine/Hydrochloride                            | 1 (0%)       | 1 (1%)     | 0 (0%)         |
| Bromhexine/Hydrochloride/Antiviral                  | 1 (0%)       | 1 (1%)     | 0 (0%)         |
| Bromhexine/Spirolactone                             | 1 (0%)       | 0 (0%)     | 1 (0%)         |
| Camostat Mesilate                                   | 1 (0%)       | 1 (1%)     | 0 (0%)         |
| Cerc-002                                            | 1 (0%)       | 1 (1%)     | 0 (0%)         |
| Choloroquine                                        | 1 (0%)       | 1 (1%)     | 0 (0%)         |
| Cigb-325                                            | 1 (0%)       | 1 (1%)     | 0 (0%)         |
| Clarithromycin                                      | 1 (0%)       | 0 (0%)     | 1 (0%)         |
| Corticosteroid/Tocilizumab                          | 1 (0%)       | 0 (0%)     | 1 (0%)         |
| Corticosteroid/Lopinavir/Ritonavir/Interferon Alpha | 1 (0%)       | 0 (0%)     | 1 (0%)         |
| Corticosteroid/Ns-Immunosuppresant                  | 1 (0%)       | 0 (0%)     | 1 (0%)         |
| Corticosteroids/Anakinra                            | 1 (0%)       | 0 (0%)     | 1 (0%)         |
| Corticosteroids/Baricitinib                         | 1 (0%)       | 0 (0%)     | 1 (0%)         |
| Cotrimoxazole                                       | 1 (0%)       | 0 (0%)     | 1 (0%)         |
| Cyclooxygenase-2                                    | 1 (0%)       | 0 (0%)     | 1 (0%)         |
| Cyclosporine A                                      | 1 (0%)       | 0 (0%)     | 1 (0%)         |
| Dexamethasone/Tofacitinib                           | 1 (0%)       | 0 (0%)     | 1 (0%)         |
| Diphenhydramine/Ammonium Chloride                   | 1 (0%)       | 1 (1%)     | 0 (0%)         |
| Doxycycline                                         | 1 (0%)       | 1 (1%)     | 0 (0%)         |
| Dutasteride                                         | 1 (0%)       | 1 (1%)     | 0 (0%)         |
| Eculizumab                                          | 1 (0%)       | 0 (0%)     | 1 (0%)         |

**Comparative-effectiveness research of COVID-19 treatment: A rapid scoping review**

|                                                                                           | <b>Total</b> | <b>RCT</b> | <b>Non-RCT</b> |
|-------------------------------------------------------------------------------------------|--------------|------------|----------------|
| <b>Total</b>                                                                              | <b>630</b>   | <b>190</b> | <b>440</b>     |
| Epoprostenol - Aerosolized                                                                | 1 (0%)       | 0 (0%)     | 1 (0%)         |
| Equine Polyclonal Antibodies                                                              | 1 (0%)       | 1 (1%)     | 0 (0%)         |
| Favipiravir/Chloroquine Hydroxychloroquine/Lopinavir/<br>Ritonavir Or Darunavir/Ritonavir | 1 (0%)       | 0 (0%)     | 1 (0%)         |
| Favipiravir/Chloroquine Hydroxychloroquine/Lopinavir/<br>Ritonavir Darunavir/Ritonavir    | 1 (0%)       | 0 (0%)     | 1 (0%)         |
| Favipiravir/Interferon Beta-1b                                                            | 1 (0%)       | 1 (1%)     | 0 (0%)         |
| Firazyr                                                                                   | 1 (0%)       | 0 (0%)     | 1 (0%)         |
| Flash Frozen Plasma                                                                       | 1 (0%)       | 1 (1%)     | 0 (0%)         |
| Fluticasone Spray/Triamcinolone                                                           | 1 (0%)       | 0 (0%)     | 1 (0%)         |
| Fluvoxamine                                                                               | 1 (0%)       | 1 (1%)     | 0 (0%)         |
| Glucocorticoids/Interferon                                                                | 1 (0%)       | 0 (0%)     | 1 (0%)         |
| Hydroxychloroquine Or Chloroquine                                                         | 1 (0%)       | 0 (0%)     | 1 (0%)         |
| Hydroxychloroquine/Lopinavir/Ritonavir                                                    | 1 (0%)       | 0 (0%)     | 1 (0%)         |
| Hydroxychloroquine/Lopinavir/Ritonavir/Azithromycin                                       | 1 (0%)       | 1 (1%)     | 0 (0%)         |
| Hydroxychloroquine/Favipiravir                                                            | 1 (0%)       | 0 (0%)     | 1 (0%)         |
| Hydroxychloroquine/Lopinavir/Ritonavir                                                    | 1 (0%)       | 0 (0%)     | 1 (0%)         |
| Hydroxyzine                                                                               | 1 (0%)       | 0 (0%)     | 1 (0%)         |
| Inhaled Adenosine                                                                         | 1 (0%)       | 0 (0%)     | 1 (0%)         |
| Inhaled Corticosteroid                                                                    | 1 (0%)       | 0 (0%)     | 1 (0%)         |
| Inhaled Nitric Oxide                                                                      | 1 (0%)       | 1 (1%)     | 0 (0%)         |
| Interferon-B 1a/Lopinavir/Ritonavir                                                       | 1 (0%)       | 0 (0%)     | 1 (0%)         |
| Interferon Alpha-2b/Arbidol                                                               | 1 (0%)       | 0 (0%)     | 1 (0%)         |
| Interferon Alpha-2b/Lopinavir/Ritonavir                                                   | 1 (0%)       | 0 (0%)     | 1 (0%)         |
| Interferon Beta-1a                                                                        | 1 (0%)       | 1 (1%)     | 0 (0%)         |
| Itraconazole                                                                              | 1 (0%)       | 1 (1%)     | 0 (0%)         |
| Ivermectin/Azithromycin                                                                   | 1 (0%)       | 0 (0%)     | 1 (0%)         |



## Comparative-effectiveness research of COVID-19 treatment: A rapid scoping review

|                                                                   | <b>Total</b> | <b>RCT</b> | <b>Non-RCT</b> |
|-------------------------------------------------------------------|--------------|------------|----------------|
| <b>Total</b>                                                      | <b>630</b>   | <b>190</b> | <b>440</b>     |
| Leflunomide/Interferon Alpha 2a                                   | 1 (0%)       | 1 (1%)     | 0 (0%)         |
| Levamisole                                                        | 1 (0%)       | 1 (1%)     | 0 (0%)         |
| Levofloxacin                                                      | 1 (0%)       | 0 (0%)     | 1 (0%)         |
| Linezolid                                                         | 1 (0%)       | 0 (0%)     | 1 (0%)         |
| Lopinavir/Hydroxychloroquine                                      | 1 (0%)       | 0 (0%)     | 1 (0%)         |
| Lopinavir/Ritonavir Or Hydroxychloroquine+Prednisone              | 1 (0%)       | 0 (0%)     | 1 (0%)         |
| Lopinavir/Ritonavir/Arbidol                                       | 1 (0%)       | 0 (0%)     | 1 (0%)         |
| Lopinavir/Ritonavir/Chloroquine                                   | 1 (0%)       | 0 (0%)     | 1 (0%)         |
| Lopinavir/Ritonavir/Interferon                                    | 1 (0%)       | 0 (0%)     | 1 (0%)         |
| Lopinavir/Ritonavir/Interferon-Alpha/Abidor Ribavirin Chloroquine | 1 (0%)       | 0 (0%)     | 1 (0%)         |
| Lopinavir/Ritonavir/Interferon Beta-2b                            | 1 (0%)       | 0 (0%)     | 1 (0%)         |
| Lopinavir/Ritonavir/Interferon/Arbidol                            | 1 (0%)       | 0 (0%)     | 1 (0%)         |
| Lopinavir/Ritonavir/Novaféron                                     | 1 (0%)       | 0 (0%)     | 1 (0%)         |
| Lopinavir/Ritonavir/Novaféron/Interferon                          | 1 (0%)       | 0 (0%)     | 1 (0%)         |
| Losartan                                                          | 1 (0%)       | 1 (1%)     | 0 (0%)         |
| Meplazumab                                                        | 1 (0%)       | 0 (0%)     | 1 (0%)         |
| Meropenem                                                         | 1 (0%)       | 0 (0%)     | 1 (0%)         |
| Mesenchymal Stromal Cells                                         | 1 (0%)       | 0 (0%)     | 1 (0%)         |
| Methylprednisolone/Dexamethasone                                  | 1 (0%)       | 0 (0%)     | 1 (0%)         |
| Methylprednisolone/Ivig                                           | 1 (0%)       | 1 (1%)     | 0 (0%)         |
| Multi-Mechanism Approach                                          | 1 (0%)       | 0 (0%)     | 1 (0%)         |
| Nebulised Interferon Beta-1a                                      | 1 (0%)       | 1 (1%)     | 0 (0%)         |
| Nitazoxanide/Azithromycin                                         | 1 (0%)       | 1 (1%)     | 0 (0%)         |
| Nitazoxanide/Doxycycline                                          | 1 (0%)       | 1 (1%)     | 0 (0%)         |
| Olokizumab                                                        | 1 (0%)       | 0 (0%)     | 1 (0%)         |

**Comparative-effectiveness research of COVID-19 treatment: A rapid scoping review**

|                                                          | <b>Total</b> | <b>RCT</b> | <b>Non-RCT</b> |
|----------------------------------------------------------|--------------|------------|----------------|
| <b>Total</b>                                             | <b>630</b>   | <b>190</b> | <b>440</b>     |
| Opaganib                                                 | 1 (0%)       | 0 (0%)     | 1 (0%)         |
| Otilimab                                                 | 1 (0%)       | 1 (1%)     | 0 (0%)         |
| Pentoxifylline                                           | 1 (0%)       | 1 (1%)     | 0 (0%)         |
| Pipamperone And Citalopram                               | 1 (0%)       | 1 (1%)     | 0 (0%)         |
| Piperacillin                                             | 1 (0%)       | 0 (0%)     | 1 (0%)         |
| Polymerized-Collagen                                     | 1 (0%)       | 1 (1%)     | 0 (0%)         |
| Poractant Alfa                                           | 1 (0%)       | 0 (0%)     | 1 (0%)         |
| Progesterone                                             | 1 (0%)       | 1 (1%)     | 0 (0%)         |
| Prophylactic Anticoagulant                               | 1 (0%)       | 0 (0%)     | 1 (0%)         |
| Proxalutamide                                            | 1 (0%)       | 1 (1%)     | 0 (0%)         |
| Pyridostigmine                                           | 1 (0%)       | 1 (1%)     | 0 (0%)         |
| Recombinant Interleukin-2                                | 1 (0%)       | 0 (0%)     | 1 (0%)         |
| Remdesivir/Corticosteroid                                | 1 (0%)       | 0 (0%)     | 1 (0%)         |
| Ribavirin/Lopinavir/Ritonavir/Interferon-Alpha           | 1 (0%)       | 0 (0%)     | 1 (0%)         |
| Ribavirin/Arbidol/Hydroxichloroquine/Lopinavir/Ritonavir | 1 (0%)       | 0 (0%)     | 1 (0%)         |
| Ribavirin/Hydroxichloroquine/Lopinavir/Ritonavir         | 1 (0%)       | 0 (0%)     | 1 (0%)         |
| Rimantadine                                              | 1 (0%)       | 0 (0%)     | 1 (0%)         |
| Ruxolitinib                                              | 1 (0%)       | 0 (0%)     | 1 (0%)         |
| Sofosbuvir/Daclatasvir                                   | 1 (0%)       | 1 (1%)     | 0 (0%)         |
| Sofosbuvir/Daclatasvir/Hydroxychloroquine                | 1 (0%)       | 1 (1%)     | 0 (0%)         |
| Sofosbuvir/Ledipasvir                                    | 1 (0%)       | 1 (1%)     | 0 (0%)         |
| Soludexide                                               | 1 (0%)       | 1 (1%)     | 0 (0%)         |
| Sulodexide                                               | 1 (0%)       | 1 (1%)     | 0 (0%)         |
| Telmisartan                                              | 1 (0%)       | 1 (1%)     | 0 (0%)         |
| Theophylline/Pentoxifylline                              | 1 (0%)       | 0 (0%)     | 1 (0%)         |
| Tocilizumab/Convalescent Plasma                          | 1 (0%)       | 0 (0%)     | 1 (0%)         |

## Comparative-effectiveness research of COVID-19 treatment: A rapid scoping review

|                                           | <b>Total</b> | <b>RCT</b> | <b>Non-RCT</b> |
|-------------------------------------------|--------------|------------|----------------|
| <b>Total</b>                              | <b>630</b>   | <b>190</b> | <b>440</b>     |
| Tocilizumab/Favipiravir                   | 1 (0%)       | 1 (1%)     | 0 (0%)         |
| Tocilizumab/Steroids/Anakinra/Baricitinib | 1 (0%)       | 0 (0%)     | 1 (0%)         |
| Triazavirin                               | 1 (0%)       | 1 (1%)     | 0 (0%)         |
| Vermeclin/Doxycycline                     | 1 (0%)       | 1 (1%)     | 0 (0%)         |
| Vilobelimab                               | 1 (0%)       | 1 (1%)     | 0 (0%)         |
| Vitamin D/Magnesium/Vitamin B12           | 1 (0%)       | 0 (0%)     | 1 (0%)         |
| Vitamins/Dietary Supplements              | 1 (0%)       | 0 (0%)     | 1 (0%)         |
| Zanamivir                                 | 1 (0%)       | 0 (0%)     | 1 (0%)         |

## Comparative-effectiveness research of COVID-19 treatment: A rapid scoping review

Table A3. Treatment type of single treatment

|                                 | <b>Total</b> | <b>RCT</b> | <b>Non-RCT</b> |
|---------------------------------|--------------|------------|----------------|
| <b>Total</b>                    | <b>711</b>   | <b>202</b> | <b>509</b>     |
| Non-Steroidal Immunosuppressant | 126 (18%)    | 27 (13%)   | 99 (19%)       |
| Steroid                         | 110 (15%)    | 15 (7%)    | 95 (19%)       |
| Antiviral                       | 97 (14%)     | 40 (20%)   | 57 (11%)       |
| Antimalaria                     | 87 (12%)     | 25 (12%)   | 62 (12%)       |
| Anticoagulant                   | 66 (5%)      | 5 (3%)     | 61 (12%)       |
| Anticoagulant-Therapeutic       | 17 (2%)      | 2 (1%)     | 15 (3%)        |
| Anticoagulant-Prophylactic      | 14 (2%)      | 0 (0%)     | 14 (3%)        |
| Convalescent Plasma             | 56 (8%)      | 16 (8%)    | 40 (8%)        |
| Antibiotic                      | 29 (4%)      | 7 (3%)     | 22 (4%)        |
| Anti- Inflammatory              | 20 (3%)      | 8 (4%)     | 12 (2%)        |
| Interferon Therapy              | 16 (2%)      | 7 (3%)     | 9 (2%)         |
| Antiparasitic                   | 14 (2%)      | 12 (6%)    | 2 (0%)         |
| Immunomodulator                 | 14 (2%)      | 4 (2%)     | 10 (2%)        |
| Neutralizing Antibodies         | 13 (2%)      | 7 (3%)     | 6 (1%)         |
| Mesenchymal Stem Cells          | 9 (1%)       | 4 (2%)     | 5 (1%)         |
| Statin                          | 7 (1%)       | 0 (0%)     | 7 (1%)         |
| Intravenous Immunoglobulin      | 6 (1%)       | 4 (2%)     | 2 (0%)         |
| Vitamin C                       | 6 (1%)       | 4 (2%)     | 2 (0%)         |
| Antihistamine                   | 4 (1%)       | 0 (0%)     | 4 (1%)         |
| Antipsychotic                   | 4 (1%)       | 0 (0%)     | 4 (1%)         |
| Vitamin D                       | 4 (1%)       | 3 (1%)     | 1 (0%)         |

## Comparative-effectiveness research of COVID-19 treatment: A rapid scoping review

Table A4. Treatment type of combination treatment

|                                                          | <b>Total</b> | <b>RCT</b> | <b>Non-RCT</b> |
|----------------------------------------------------------|--------------|------------|----------------|
| <b>Total</b>                                             | <b>116</b>   | <b>29</b>  | <b>87</b>      |
| Antimalaria/Antibiotic                                   | 19 (16%)     | 2 (7%)     | 17 (20%)       |
| Steroid/NS-Immunosuppressant                             | 10 (9%)      | 0 (0%)     | 10 (11%)       |
| Antimalaria/Antiviral/Antiviral                          | 8 (7%)       | 1 (3%)     | 7 (8%)         |
| Antiviral/Antiviral                                      | 5 (4%)       | 3 (10%)    | 2 (2%)         |
| Antiviral/Interferon                                     | 5 (4%)       | 0 (0%)     | 5 (6%)         |
| Antimalaria/Antiviral                                    | 4 (3%)       | 0 (0%)     | 4 (5%)         |
| Antimalaria/Antiviral/Antibiotic                         | 4 (3%)       | 4 (14%)    | 0 (0%)         |
| Antiparasitic/Antibiotic                                 | 4 (3%)       | 3 (10%)    | 1 (1%)         |
| Antiviral/Antiviral/Antiviral                            | 4 (3%)       | 0 (0%)     | 4 (5%)         |
| Antiviral/Antiviral/Antiviral/Interferon                 | 4 (3%)       | 0 (0%)     | 4 (5%)         |
| Antiviral/NS-Immunosuppressant                           | 4 (3%)       | 3 (10%)    | 1 (1%)         |
| NS-Immunosuppressant/Steroid                             | 4 (3%)       | 0 (0%)     | 4 (5%)         |
| ACEI/ARB                                                 | 3 (3%)       | 0 (0%)     | 3 (3%)         |
| Antiviral/Antibiotic                                     | 3 (3%)       | 2 (7%)     | 1 (1%)         |
| Antiviral/Antiviral/Interferon                           | 3 (3%)       | 1 (3%)     | 2 (2%)         |
| ACEI/ARB/Statin                                          | 2 (2%)       | 0 (0%)     | 2 (2%)         |
| Antimalaria/Antiviral/NS-Immunosuppressant               | 2 (2%)       | 0 (0%)     | 2 (2%)         |
| Antiviral/Anti-Inflammatory                              | 2 (2%)       | 2 (7%)     | 0 (0%)         |
| Steroid/Steroid                                          | 2 (2%)       | 0 (0%)     | 2 (2%)         |
| Vitamin C/Zinc                                           | 2 (2%)       | 2 (7%)     | 0 (0%)         |
| Anticoagulant/Ns-Immunosuppressant                       | 1 (1%)       | 0 (0%)     | 1 (1%)         |
| Antihistamine/Disinfectant                               | 1 (1%)       | 1 (3%)     | 0 (0%)         |
| Antimalaria/Mucolytic                                    | 2 (2%)       | 1 (3%)     | 1 (1%)         |
| Antimalaria/Antiviral/Antiviral/Antibiotic               | 1 (1%)       | 1 (3%)     | 0 (0%)         |
| Antimalaria/Antiviral/Antiviral/Antiviral                | 1 (1%)       | 0 (0%)     | 1 (1%)         |
| Antimalaria/Antiviral/Antiviral/Interferon               | 1 (1%)       | 0 (0%)     | 1 (1%)         |
| Antimalaria/Antiviral/Mucolytic                          | 1 (1%)       | 1 (3%)     | 0 (0%)         |
| Antiviral/Antiviral/Antibiotic/Anti-Inflammatory/Steroid | 1 (1%)       | 0 (0%)     | 1 (1%)         |
| Antiviral/Antiviral/Antimalaria/Steroid                  | 1 (1%)       | 0 (0%)     | 1 (1%)         |
| Antiviral/Immunomodulator                                | 1 (1%)       | 1 (3%)     | 0 (0%)         |
| Antiviral/Interferon/Steroid                             | 1 (1%)       | 0 (0%)     | 1 (1%)         |
| Antiviral/Steroid                                        | 1 (1%)       | 0 (0%)     | 1 (1%)         |
| Bronchodilator/Hemorrhologic Agent                       | 1 (1%)       | 0 (0%)     | 1 (1%)         |
| Mucolytic/Diuretic                                       | 1 (1%)       | 0 (0%)     | 1 (1%)         |
| NS-Immunosuppressant/Convalescent Plasma                 | 1 (1%)       | 0 (0%)     | 1 (1%)         |
| NS-Immunosuppressants/IVIG                               | 1 (1%)       | 0 (0%)     | 1 (1%)         |
| Steroid/Anti-Inflammatory                                | 1 (1%)       | 0 (0%)     | 1 (1%)         |
| Steroid/Interferon                                       | 1 (1%)       | 0 (0%)     | 1 (1%)         |
| Steroid/IVIG                                             | 1 (1%)       | 1 (3%)     | 0 (0%)         |
| Vitamin D/Magnesium/Vitamin B12                          | 1 (1%)       | 0 (0%)     | 1 (1%)         |

**Comparative-effectiveness research of COVID-19 treatment: A rapid scoping review**

|                              | <b>Total</b> | <b>RCT</b> | <b>Non-RCT</b> |
|------------------------------|--------------|------------|----------------|
| <b>Total</b>                 | <b>116</b>   | <b>29</b>  | <b>87</b>      |
| Vitamins/Dietary Supplements | 1 (1%)       | 0 (0%)     | 1 (1%)         |

Note: NS-immunosuppressant: non-steroidal immunosuppressant. ACEI/ARB: angiotensin-converting enzyme (ACE) inhibitor and an angiotensin receptor blocker (ARB). IVIG: Intravenous immune globulin.

For peer review only

## Comparative-effectiveness research of COVID-19 treatment: A rapid scoping review

Table A5. Country of knowledge synthesis conduct

|                 | <b>Total (n = 299)</b> | <b>With protocol (n = 88)</b> | <b>Without protocol (n = 211)</b> |
|-----------------|------------------------|-------------------------------|-----------------------------------|
| United States   | 57 (19%)               | 13 (15%)                      | 44 (21%)                          |
| China           | 40 (13%)               | 13 (15%)                      | 27 (13%)                          |
| India           | 34 (11%)               | 12 (14%)                      | 22 (10%)                          |
| Iran            | 18 (6%)                | 3 (3%)                        | 15 (7%)                           |
| United Kingdom  | 18 (6%)                | 3 (3%)                        | 15 (7%)                           |
| Saudi Arabia    | 13 (4%)                | 1 (1%)                        | 12 (6%)                           |
| Canada          | 12 (4%)                | 5 (6%)                        | 7 (3%)                            |
| Italy           | 12 (4%)                | 8 (9%)                        | 4 (2%)                            |
| Indonesia       | 9 (3%)                 | 2 (2%)                        | 7 (3%)                            |
| Malaysia        | 7 (2%)                 | 0 (0%)                        | 7 (3%)                            |
| Egypt           | 5 (2%)                 | 2 (2%)                        | 3 (1%)                            |
| France          | 5 (2%)                 | 3 (3%)                        | 2 (1%)                            |
| Peru            | 5 (2%)                 | 1 (1%)                        | 4 (2%)                            |
| Taiwan          | 5 (2%)                 | 1 (1%)                        | 4 (2%)                            |
| Australia       | 4 (1%)                 | 1 (1%)                        | 3 (1%)                            |
| Brazil          | 4 (1%)                 | 1 (1%)                        | 3 (1%)                            |
| Chile           | 4 (1%)                 | 4 (5%)                        | 0 (0%)                            |
| Japan           | 4 (1%)                 | 2 (2%)                        | 2 (1%)                            |
| Nepal           | 4 (1%)                 | 0 (0%)                        | 4 (2%)                            |
| Spain           | 4 (1%)                 | 1 (1%)                        | 3 (1%)                            |
| Bangladesh      | 3 (1%)                 | 0 (0%)                        | 3 (1%)                            |
| Greece          | 3 (1%)                 | 1 (1%)                        | 2 (1%)                            |
| Korea           | 3 (1%)                 | 1 (1%)                        | 2 (1%)                            |
| Pakistan        | 3 (1%)                 | 0 (0%)                        | 3 (1%)                            |
| The Netherlands | 3 (1%)                 | 1 (1%)                        | 2 (1%)                            |
| Denmark         | 2 (1%)                 | 1 (1%)                        | 1 (0%)                            |
| Germany         | 2 (1%)                 | 2 (2%)                        | 0 (0%)                            |
| Israel          | 2 (1%)                 | 1 (1%)                        | 1 (0%)                            |
| Lebanon         | 2 (1%)                 | 0 (0%)                        | 2 (1%)                            |
| Mexico          | 2 (1%)                 | 2 (2%)                        | 0 (0%)                            |
| Thailand        | 2 (1%)                 | 2 (2%)                        | 0 (0%)                            |
| Switzerland     | 1 (0%)                 | 0 (0%)                        | 1 (0%)                            |
| Tunisia         | 1 (0%)                 | 0 (0%)                        | 1 (0%)                            |
| Nigeria         | 1 (0%)                 | 1 (1%)                        | 0 (0%)                            |
| Portugal        | 1 (0%)                 | 0 (0%)                        | 1 (0%)                            |
| Qatar           | 1 (0%)                 | 0 (0%)                        | 1 (0%)                            |
| Romania         | 1 (0%)                 | 0 (0%)                        | 1 (0%)                            |
| Sweden          | 1 (0%)                 | 0 (0%)                        | 1 (0%)                            |
| Turkey          | 1 (0%)                 | 0 (0%)                        | 1 (0%)                            |

## Comparative-effectiveness research of COVID-19 treatment: A rapid scoping review

Table A6. Treatment evaluated in knowledge syntheses

|                                       | <b>Total (n = 518)</b> | <b>With Protocol (n = 152)</b> | <b>Without Protocol (n = 366)</b> |
|---------------------------------------|------------------------|--------------------------------|-----------------------------------|
| Hydroxychloroquine                    | 58 (11%)               | 15 (10%)                       | 43 (12%)                          |
| Remdesivir                            | 39 (8%)                | 11 (7%)                        | 28 (8%)                           |
| Tocilizumab                           | 35 (7%)                | 10 (7%)                        | 25 (7%)                           |
| Corticosteroid                        | 35 (7%)                | 10 (7%)                        | 25 (7%)                           |
| Convalescent Plasma                   | 33 (6%)                | 10 (7%)                        | 23 (6%)                           |
| Lopinavir-Ritonair                    | 24 (5%)                | 8 (5%)                         | 16 (4%)                           |
| Chloroquine                           | 19 (4%)                | 6 (4%)                         | 13 (4%)                           |
| Hydroxychloroquine/Azithromycin       | 14 (3%)                | 1 (1%)                         | 13 (4%)                           |
| Antivirals                            | 12 (2%)                | 4 (3%)                         | 8 (2%)                            |
| Anticoagulant                         | 11 (2%)                | 2 (1%)                         | 9 (2%)                            |
| Azithromycin                          | 11 (2%)                | 3 (2%)                         | 8 (2%)                            |
| Favipiravir                           | 10 (2%)                | 1 (1%)                         | 9 (2%)                            |
| Hydroxychloroquine/Chloroquine        | 10 (2%)                | 4 (3%)                         | 6 (2%)                            |
| Colchicine                            | 9 (2%)                 | 2 (1%)                         | 7 (2%)                            |
| Dexamethasone                         | 9 (2%)                 | 1 (1%)                         | 8 (2%)                            |
| Arbidol                               | 7 (1%)                 | 1 (1%)                         | 6 (2%)                            |
| Invermectin                           | 7 (1%)                 | 3 (2%)                         | 4 (1%)                            |
| Glucocorticoid                        | 7 (1%)                 | 3 (2%)                         | 4 (1%)                            |
| Acei/Arb                              | 6 (1%)                 | 4 (3%)                         | 2 (1%)                            |
| Therapeutic Anticoagulant             | 5 (1%)                 | 2 (1%)                         | 3 (1%)                            |
| Prophylactic Anticoagulant            | 4 (1%)                 | 3 (2%)                         | 1 (0%)                            |
| Anakinra                              | 4 (1%)                 | 3 (2%)                         | 1 (0%)                            |
| Famotidine                            | 4 (1%)                 | 1 (1%)                         | 3 (1%)                            |
| Jak-Inhibitors                        | 4 (1%)                 | 2 (1%)                         | 2 (1%)                            |
| Sarilumab                             | 4 (1%)                 | 4 (3%)                         | 0 (0%)                            |
| Antibiotics                           | 3 (1%)                 | 1 (1%)                         | 2 (1%)                            |
| Antimalaria                           | 3 (1%)                 | 1 (1%)                         | 2 (1%)                            |
| Chloroquine/Hcq/Azithromycin          | 3 (1%)                 | 3 (2%)                         | 0 (0%)                            |
| Immunomodulation Treatment            | 3 (1%)                 | 1 (1%)                         | 2 (1%)                            |
| Interferon-Beta                       | 3 (1%)                 | 1 (1%)                         | 2 (1%)                            |
| Intravenous Immunoglobulin            | 3 (1%)                 | 1 (1%)                         | 2 (1%)                            |
| Methylprednisolone                    | 3 (1%)                 | 0 (0%)                         | 3 (1%)                            |
| Statins                               | 3 (1%)                 | 0 (0%)                         | 3 (1%)                            |
| Umifenovir                            | 3 (1%)                 | 0 (0%)                         | 3 (1%)                            |
| Vitamin D                             | 3 (1%)                 | 1 (1%)                         | 2 (1%)                            |
| Antiplatelets                         | 2 (0%)                 | 1 (1%)                         | 1 (0%)                            |
| Antivirals/Antibiotics                | 2 (0%)                 | 2 (1%)                         | 0 (0%)                            |
| Baloxavir Marboxil                    | 2 (0%)                 | 0 (0%)                         | 2 (1%)                            |
| Bromhexine                            | 2 (0%)                 | 1 (1%)                         | 1 (0%)                            |
| Cell-Based Therapies                  | 2 (0%)                 | 1 (1%)                         | 1 (0%)                            |
| Chloroquine/Azithromycin              | 2 (0%)                 | 0 (0%)                         | 2 (1%)                            |
| Corticosteroids/Iv Immunoglobulin/ Or |                        |                                |                                   |
| Siltuximab/Tocilizumab                | 2 (0%)                 | 1 (1%)                         | 1 (0%)                            |
| Hydrocortisone                        | 2 (0%)                 | 0 (0%)                         | 2 (1%)                            |
| Hyperimmune Immunoglobulin            | 2 (0%)                 | 1 (1%)                         | 1 (0%)                            |
| Immunoglobins                         | 2 (0%)                 | 0 (0%)                         | 2 (1%)                            |



## Comparative-effectiveness research of COVID-19 treatment: A rapid scoping review

|                                                                          | <b>Total (n = 518)</b> | <b>With Protocol (n = 152)</b> | <b>Without Protocol (n = 366)</b> |
|--------------------------------------------------------------------------|------------------------|--------------------------------|-----------------------------------|
| Interferon-Beta-1a                                                       | 2 (0%)                 | 1 (1%)                         | 1 (0%)                            |
| Interleukin- 6 Inhibitors                                                | 2 (0%)                 | 0 (0%)                         | 2 (1%)                            |
| Mesenchymal Stem Cells                                                   | 2 (0%)                 | 1 (1%)                         | 1 (0%)                            |
| Ruxolitinib                                                              | 2 (0%)                 | 0 (0%)                         | 2 (1%)                            |
| Tocilizumab/Sarilumab                                                    | 2 (0%)                 | 0 (0%)                         | 2 (1%)                            |
| Acalabrutinib                                                            | 1 (0%)                 | 0 (0%)                         | 1 (0%)                            |
| All Pharmacologicals                                                     | 1 (0%)                 | 1 (1%)                         | 0 (0%)                            |
| Anticoagulant Therapeutic                                                | 1 (0%)                 | 1 (1%)                         | 0 (0%)                            |
| Antiinflammatories                                                       | 1 (0%)                 | 0 (0%)                         | 1 (0%)                            |
| Antiretroviral                                                           | 1 (0%)                 | 0 (0%)                         | 1 (0%)                            |
| Antirheumatic                                                            | 1 (0%)                 | 1 (1%)                         | 0 (0%)                            |
| Antitumor                                                                | 1 (0%)                 | 0 (0%)                         | 1 (0%)                            |
| Arbidol/Lopinavir+Ritonavir                                              | 1 (0%)                 | 0 (0%)                         | 1 (0%)                            |
| Aspirin                                                                  | 1 (0%)                 | 0 (0%)                         | 1 (0%)                            |
| Azithromycin/Hcq                                                         | 1 (0%)                 | 0 (0%)                         | 1 (0%)                            |
| Azithromycin/Zinc                                                        | 1 (0%)                 | 0 (0%)                         | 1 (0%)                            |
| Calcifediol                                                              | 1 (0%)                 | 0 (0%)                         | 1 (0%)                            |
| Clazakisumab                                                             | 1 (0%)                 | 1 (1%)                         | 0 (0%)                            |
| Convalescent Plasma Or Hyperimmune Plasma                                | 1 (0%)                 | 0 (0%)                         | 1 (0%)                            |
| Corticosteroid/Antivirals                                                | 1 (0%)                 | 0 (0%)                         | 1 (0%)                            |
| Corticosteroids/ Tocilizumab/Anakinra/Ivig                               | 1 (0%)                 | 0 (0%)                         | 1 (0%)                            |
| Cytokine Therapy                                                         | 1 (0%)                 | 0 (0%)                         | 1 (0%)                            |
| Dpp-4 Inhibitor                                                          | 1 (0%)                 | 1 (1%)                         | 0 (0%)                            |
| Favipiravir/ Baloxavir Marboxil                                          | 1 (0%)                 | 0 (0%)                         | 1 (0%)                            |
| Favipiravir/Other Antivirals                                             | 1 (0%)                 | 0 (0%)                         | 1 (0%)                            |
| Galidesivir/Sofosbuvir/Ribavirin                                         | 1 (0%)                 | 0 (0%)                         | 1 (0%)                            |
| Hydroxychloroquine/Antibiotics                                           | 1 (0%)                 | 0 (0%)                         | 1 (0%)                            |
| Hydroxychloroquine/Azithromycin/Ribavirin/Interfe<br>ron/Interferon Alfa | 1 (0%)                 | 0 (0%)                         | 1 (0%)                            |
| Hydroxychloroquine/Chloroquine/Azithromycin                              | 1 (0%)                 | 0 (0%)                         | 1 (0%)                            |
| Hydroxychloroquine/Chloroquine/Azithromycin/Or<br>Lopinavir/Ritonavir    | 1 (0%)                 | 1 (1%)                         | 0 (0%)                            |
| Hydroxychloroquine/Lopinavir-Ritonair                                    | 1 (0%)                 | 0 (0%)                         | 1 (0%)                            |
| Hydroxychloroquine/Ribavirin/Interferon/Interferon<br>Alfa               | 1 (0%)                 | 0 (0%)                         | 1 (0%)                            |
| Hyrdocortisone                                                           | 1 (0%)                 | 0 (0%)                         | 1 (0%)                            |
| Ibrutinib                                                                | 1 (0%)                 | 0 (0%)                         | 1 (0%)                            |
| Ifn B-1b/ Immunomodulatory/Antivirals                                    | 1 (0%)                 | 0 (0%)                         | 1 (0%)                            |
| Immune Modulation Drugs                                                  | 1 (0%)                 | 0 (0%)                         | 1 (0%)                            |
| Immune Therapy/Or Antiviral Therapy/Or Both                              | 1 (0%)                 | 0 (0%)                         | 1 (0%)                            |
| Immunoglobulin                                                           | 1 (0%)                 | 0 (0%)                         | 1 (0%)                            |
| Immunomodulation/Hcq/Cq                                                  | 1 (0%)                 | 0 (0%)                         | 1 (0%)                            |
| Prophylaxis Coagulant                                                    | 1 (0%)                 | 1 (1%)                         | 0 (0%)                            |
| Interferon-Beta/Rbv                                                      | 1 (0%)                 | 0 (0%)                         | 1 (0%)                            |
| Interferon Alpha-2b                                                      | 1 (0%)                 | 0 (0%)                         | 1 (0%)                            |
| Interferons                                                              | 1 (0%)                 | 0 (0%)                         | 1 (0%)                            |
| Interleukin-6 Inhibitors                                                 | 1 (0%)                 | 1 (1%)                         | 0 (0%)                            |
| Interleukin-6/Tocilizumab                                                | 1 (0%)                 | 1 (1%)                         | 0 (0%)                            |

## Comparative-effectiveness research of COVID-19 treatment: A rapid scoping review

|                                                                | <b>Total (n = 518)</b> | <b>With Protocol (n = 152)</b> | <b>Without Protocol (n = 366)</b> |
|----------------------------------------------------------------|------------------------|--------------------------------|-----------------------------------|
| Intravenous Steroids                                           | 1 (0%)                 | 0 (0%)                         | 1 (0%)                            |
| Jak-Inhibitor/Type I Interferon                                | 1 (0%)                 | 0 (0%)                         | 1 (0%)                            |
| Levilimab                                                      | 1 (0%)                 | 1 (1%)                         | 0 (0%)                            |
| Lopinavir                                                      | 1 (0%)                 | 1 (1%)                         | 0 (0%)                            |
| Lopinavir-Ritonair/Arbidol                                     | 1 (0%)                 | 0 (0%)                         | 1 (0%)                            |
| Lopinavir-Ritonair/Azithromycin                                | 1 (0%)                 | 0 (0%)                         | 1 (0%)                            |
| Lopinavir-Ritonair/Remdesivir                                  | 1 (0%)                 | 0 (0%)                         | 1 (0%)                            |
| Lopinavir-Ritonair/Ribavirin/Interferon Beta                   | 1 (0%)                 | 0 (0%)                         | 1 (0%)                            |
| Meplazumab                                                     | 1 (0%)                 | 0 (0%)                         | 1 (0%)                            |
| Methylprednisone                                               | 1 (0%)                 | 0 (0%)                         | 1 (0%)                            |
| Neutralizing Antibody                                          | 1 (0%)                 | 0 (0%)                         | 1 (0%)                            |
| Nsaids                                                         | 1 (0%)                 | 0 (0%)                         | 1 (0%)                            |
| Olokizumab                                                     | 1 (0%)                 | 1 (1%)                         | 0 (0%)                            |
| Oseltamivir/Lopinavir/Ritonavir/Arbidol/Ribavirin/Sfjdc/ Other | 1 (0%)                 | 0 (0%)                         | 1 (0%)                            |
| Pentoxifylline                                                 | 1 (0%)                 | 0 (0%)                         | 1 (0%)                            |
| Recombinant Human Gcsf                                         | 1 (0%)                 | 0 (0%)                         | 1 (0%)                            |
| Renal Replacement Therapy/ Glucocorticoids                     | 1 (0%)                 | 0 (0%)                         | 1 (0%)                            |
| Repurposed Pharmacological Agents                              | 1 (0%)                 | 1 (1%)                         | 0 (0%)                            |
| Ribavirin                                                      | 1 (0%)                 | 1 (1%)                         | 0 (0%)                            |
| Rna-Dependent Rna Polymerase                                   | 1 (0%)                 | 0 (0%)                         | 1 (0%)                            |
| Sofosbuvir/Daclatasvir                                         | 1 (0%)                 | 0 (0%)                         | 1 (0%)                            |
| Stem Cell Therapy                                              | 1 (0%)                 | 0 (0%)                         | 1 (0%)                            |
| Sulodexide                                                     | 1 (0%)                 | 0 (0%)                         | 1 (0%)                            |
| Type I Interferons                                             | 1 (0%)                 | 0 (0%)                         | 1 (0%)                            |
| Vitamin C                                                      | 1 (0%)                 | 0 (0%)                         | 1 (0%)                            |

Note: NS-immunosuppressant: non-steroidal immunosuppressant. ACEI/ARB: angiotensin-converting enzyme (ACE) inhibitor and an angiotensin receptor blocker (ARB). IVIG: Intravenous immune globulin.

## PRISMA ScR checklist

| SECTION                                  | ITEM | PRISMA-ScR CHECKLIST ITEM                                                                                                                                                                                                                                                                                  | REPORTED ON PAGE # |
|------------------------------------------|------|------------------------------------------------------------------------------------------------------------------------------------------------------------------------------------------------------------------------------------------------------------------------------------------------------------|--------------------|
| <b>TITLE</b>                             |      |                                                                                                                                                                                                                                                                                                            |                    |
| <b>Title</b>                             | 1    | Identify the report as a scoping review.                                                                                                                                                                                                                                                                   | 1                  |
| <b>ABSTRACT</b>                          |      |                                                                                                                                                                                                                                                                                                            |                    |
| <b>Structured summary</b>                | 2    | Provide a structured summary that includes (as applicable): background, objectives, eligibility criteria, sources of evidence, charting methods, results, and conclusions that relate to the review questions and objectives.                                                                              | 3-4                |
| <b>INTRODUCTION</b>                      |      |                                                                                                                                                                                                                                                                                                            |                    |
| <b>Rationale</b>                         | 3    | Describe the rationale for the review in the context of what is already known. Explain why the review questions/objectives lend themselves to a scoping review approach.                                                                                                                                   | 6                  |
| <b>Objectives</b>                        | 4    | Provide an explicit statement of the questions and objectives being addressed with reference to their key elements (e.g., population or participants, concepts, and context) or other relevant key elements used to conceptualize the review questions and/or objectives.                                  | 6                  |
| <b>METHODS</b>                           |      |                                                                                                                                                                                                                                                                                                            |                    |
| <b>Protocol and registration</b>         | 5    | Indicate whether a review protocol exists; state if and where it can be accessed (e.g., a Web address); and if available, provide registration information, including the registration number.                                                                                                             | 6                  |
| <b>Eligibility criteria</b>              | 6    | Specify characteristics of the sources of evidence used as eligibility criteria (e.g., years considered, language, and publication status), and provide a rationale.                                                                                                                                       | 7-8                |
| <b>Information sources*</b>              | 7    | Describe all information sources in the search (e.g., databases with dates of coverage and contact with authors to identify additional sources), as well as the date the most recent search was executed.                                                                                                  | 7                  |
| <b>Search</b>                            | 8    | Present the full electronic search strategy for at least 1 database, including any limits used, such that it could be repeated.                                                                                                                                                                            | 7, Appendix 2      |
| <b>Selection of sources of evidence†</b> | 9    | State the process for selecting sources of evidence (i.e., screening and eligibility) included in the scoping review.                                                                                                                                                                                      | 8                  |
| <b>Data charting process‡</b>            | 10   | Describe the methods of charting data from the included sources of evidence (e.g., calibrated forms or forms that have been tested by the team before their use, and whether data charting was done independently or in duplicate) and any processes for obtaining and confirming data from investigators. | 8-9                |
| <b>Data items</b>                        | 11   | List and define all variables for which data were sought and any assumptions and simplifications made.                                                                                                                                                                                                     | 9                  |

|                                                                          |    |                                                                                                                                                                                                       |                            |
|--------------------------------------------------------------------------|----|-------------------------------------------------------------------------------------------------------------------------------------------------------------------------------------------------------|----------------------------|
| <b>Critical appraisal of individual sources of evidence</b> <sup>§</sup> | 12 | If done, provide a rationale for conducting a critical appraisal of included sources of evidence; describe the methods used and how this information was used in any data synthesis (if appropriate). | N/A                        |
| <b>Synthesis of results</b>                                              | 13 | Describe the methods of handling and summarizing the data that were charted.                                                                                                                          | 9                          |
| <b>RESULTS</b>                                                           |    |                                                                                                                                                                                                       |                            |
| <b>Selection of sources of evidence</b>                                  | 14 | Give numbers of sources of evidence screened, assessed for eligibility, and included in the review, with reasons for exclusions at each stage, ideally using a flow diagram.                          | 9-10, Figure 1, Appendix 4 |
| <b>Characteristics of sources of evidence</b>                            | 15 | For each source of evidence, present characteristics for which data were charted and provide the citations.                                                                                           | 10-11, Table 1, Appendix 3 |
| <b>Critical appraisal within sources of evidence</b>                     | 16 | If done, present data on critical appraisal of included sources of evidence (see item 12).                                                                                                            | N/A                        |
| <b>Results of individual sources of evidence</b>                         | 17 | For each included source of evidence, present the relevant data that were charted that relate to the review questions and objectives.                                                                 | 11-12, Table 2, Appendix 5 |
| <b>Synthesis of results</b>                                              | 18 | Summarize and/or present the charting results as they relate to the review questions and objectives.                                                                                                  | 11-12, Table 5             |
| <b>DISCUSSION</b>                                                        |    |                                                                                                                                                                                                       |                            |
| <b>Summary of evidence</b>                                               | 19 | Summarize the main results (including an overview of concepts, themes, and types of evidence available), link to the review questions and objectives, and consider the relevance to key groups.       | 12-15, Table 5             |
| <b>Limitations</b>                                                       | 20 | Discuss the limitations of the scoping review process.                                                                                                                                                | 15-16                      |
| <b>Conclusions</b>                                                       | 21 | Provide a general interpretation of the results with respect to the review questions and objectives, as well as potential implications and/or next steps.                                             | 16                         |
| <b>FUNDING</b>                                                           |    |                                                                                                                                                                                                       |                            |
| <b>Funding</b>                                                           | 22 | Describe sources of funding for the included sources of evidence, as well as sources of funding for the scoping review. Describe the role of the funders of the scoping review.                       | 17                         |

JBI = Joanna Briggs Institute; PRISMA-ScR = Preferred Reporting Items for Systematic reviews and Meta-Analyses extension for Scoping Reviews.

\* Where sources of evidence (see second footnote) are compiled from, such as bibliographic databases, social media platforms, and Web sites.

† A more inclusive/heterogeneous term used to account for the different types of evidence or data sources (e.g., quantitative and/or qualitative research, expert opinion, and policy documents) that may be eligible in a scoping review as opposed to only studies. This is not to be confused with information sources (see first footnote).

‡ The frameworks by Arksey and O'Malley (6) and Levac and colleagues (7) and the JBI guidance (4, 5) refer to the process of data extraction in a scoping review as data charting.

§ The process of systematically examining research evidence to assess its validity, results, and relevance before using it to inform a decision. This term is used for items 12 and 19 instead of "risk of bias" (which is more applicable to systematic reviews of interventions) to include and acknowledge the various sources of evidence that may be used in a scoping review (e.g., quantitative and/or qualitative research, expert opinion, and policy document).
