# Supplementary material for: Comparative-effectiveness research of COVID-19 treatment: a rapid scoping review
Source: PubMed Central journal article supplement — BMJ Open. 2022 Jun 3;12(6):e045115. doi: 10.1136/bmjopen-2020-045115 (PMC9170799; doi:10.1136/bmjopen-2020-045115), 2022-06-03
Supplement: bmjopen-2020-045115supp001.pdf [file bmjopen-2020-045115supp001.pdf]

## Comparative-effectiveness research of COVID-19 treatment: A rapid scoping review

### Appendices

#### Contents

|                                                                                       |    |
|---------------------------------------------------------------------------------------|----|
| Appendix 1. The Continuous Active Learning (CAL <sup>®</sup> ) tool .....             | 1  |
| Appendix 2. EMBASE search strategy .....                                              | 2  |
| Appendix 3. List of drugs from Health Canada and Public Health Agency of Canada ..... | 8  |
| Appendix 4. List of included primary studies .....                                    | 10 |
| Appendix 5. List of included knowledge syntheses .....                                | 56 |
| Appendix 6. Additional details for the Results section .....                          | 74 |
| Figure A1. Word cloud of description of study participants .....                      | 74 |
| Table A1. Country of primary study conduct .....                                      | 75 |
| Table A2. Treatment evaluated in primary studies .....                                | 77 |
| Table A3. Treatment type of single treatment .....                                    | 86 |
| Table A4. Treatment type of combination treatment .....                               | 87 |
| Table A5. Country of knowledge synthesis conduct .....                                | 89 |
| Table A6. Treatment evaluated in knowledge syntheses .....                            | 90 |

#### Appendix 1. The Continuous Active Learning (CAL<sup>®</sup>) tool

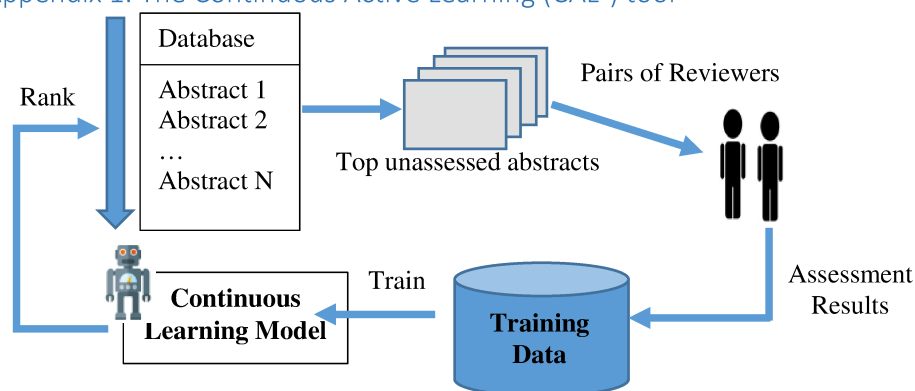

Figure. The algorithm of the CAL<sup>®</sup> tool

The above figure illustrates the algorithm in the CAL<sup>®</sup> tool. Text of the review question is used to start training the machine-learning model in the Continuous Active Learning (CAL) method. The CAL model predicts and quantifies the relevance of abstracts from a database. The abstracts are ranked in order of highest to lowest relevance. The top ranked abstracts are presented to a pair of human reviewers for relevance screening. The screening results are used to update the CAL model for better prediction, generating another batch of top ranked abstracts for screening in the next iteration of the feedback loop. The goal is to identify all relevant abstracts with minimum screening effort.

## Comparative-effectiveness research of COVID-19 treatment: A rapid scoping review

We selected the CAL<sup>®</sup> tool because it won multiple international competitions in high-recall information retrieval – the process of retrieving all relevant documents with minimal human effort (Table below)

Table. Summary of evidence on the use of the CAL<sup>®</sup> tool for knowledge synthesis conduct

| International Competition                                    | High-recall tasks                                | Key findings                                                                                                                                                                                                                                                                       |
|--------------------------------------------------------------|--------------------------------------------------|------------------------------------------------------------------------------------------------------------------------------------------------------------------------------------------------------------------------------------------------------------------------------------|
| Conference and Labs of the Evaluation Forum 2018 (1)         | 30 systematic reviews of diagnostic test studies | <i>Task 1:</i> Without any manual effort to construct literature search strategies, the CAL <sup>®</sup> tool was the most accurate with 97% recall (sensitivity). <i>Task 2:</i> For screening literature search results, CAL <sup>®</sup> was the most accurate with 99% recall. |
| Conference and Labs of the Evaluation Forum 2017 (2)         | 50 systematic reviews of diagnostic test studies | The CAL <sup>®</sup> tool was a top performer among the 14 tested with 97% to 100% recall at pre-defined stopping threshold.                                                                                                                                                       |
| Text Retrieval Conference Total Recall Tracks 2015/16 (3, 4) | 8 legal, clinical, news, email collections       | The CAL <sup>®</sup> tool attained an overall effectiveness not surpassed by any submitted method, manual or automatic.                                                                                                                                                            |

For archives that could be retrieved in their entirety (e.g., MEDLINE, pre-print servers), the CAL<sup>®</sup> tool applied broad relevant search terms using the following Posix command:

```
egrep -i 'coronav|corona vir|wuhan|hubei|huanan|[^a-z]ncov|cov2|cov.2|novel.cov|covid|sars-cov'
```

### References

1. Evangelos Kanoulas, Dan Li, Leif Azzopardi, et al. CLEF 2018 Technologically Assisted Reviews in Empirical Medicine Overview. 2018.
2. Kanoulas E, Li D, Azzopardi L, et al. CLEF 2017 technologically assisted reviews in empirical medicine overview. CEUR Workshop Proceedings, 2017.
3. Roegiest A, Cormack G, Grossman M, et al. TREC 2015 Total Recall track overview TREC. 2015.
4. Cormack GV, MR G. Multi-faceted recall of Continuous Active Learning for Technology-Assisted Review. SIGIR 2015, 2015.

### Appendix 2. EMBASE search strategy

#### Database:

Embase Classic+Embase <1947 to 2021 July 08>

| # | Query                                                                                                                                                           |
|---|-----------------------------------------------------------------------------------------------------------------------------------------------------------------|
| 1 | exp coronaviridae/ or exp Coronaviridae infection/ or exp Coronavirus infection/                                                                                |
| 2 | ((wuhan or hubei or huanan) and (severe acute respiratory or pneumonia* or virus*) and outbreak*).mp.                                                           |
| 3 | (coronavir* or "corona virus*" or "coronavirus pneumonia" or betacoronavir* or COVID or COVID-19).mp.                                                           |
| 4 | ("nCoV" or "cov 2" or cov2 or 2019ncov or 2019-nCoV or "2019 ncov" or "2019-ncov" or "2019 novel cov" or "2019 ncov disease*" or "2019 novel coronavirus*").mp. |
| 5 | "wuhan virus*".mp.                                                                                                                                              |

### Comparative-effectiveness research of COVID-19 treatment: A rapid scoping review

|    |                                                                                                                                                                                                                                                                                                                                                                                                                                                                                                                                                                                                                                                                                                                                                                                                                                                                                                                                                                                                                                                                                                                                                                                                                 |
|----|-----------------------------------------------------------------------------------------------------------------------------------------------------------------------------------------------------------------------------------------------------------------------------------------------------------------------------------------------------------------------------------------------------------------------------------------------------------------------------------------------------------------------------------------------------------------------------------------------------------------------------------------------------------------------------------------------------------------------------------------------------------------------------------------------------------------------------------------------------------------------------------------------------------------------------------------------------------------------------------------------------------------------------------------------------------------------------------------------------------------------------------------------------------------------------------------------------------------|
| 6  | or/1-5                                                                                                                                                                                                                                                                                                                                                                                                                                                                                                                                                                                                                                                                                                                                                                                                                                                                                                                                                                                                                                                                                                                                                                                                          |
| 7  | exp Interferons/ or interleukin-2/ or exp Immunoglobulin/ or anakinra/ or Sarilumab/ or Siltuximab/ or tumor necrosis factor/ or granulocyte macrophage colony stimulating factor/ or beta 1a interferon/ or interferon beta serine/                                                                                                                                                                                                                                                                                                                                                                                                                                                                                                                                                                                                                                                                                                                                                                                                                                                                                                                                                                            |
| 8  | (interferon* or "Interferon-alpha" or "Interferon-beta" or "avonex" or "interferon beta-1a" or "Betaseron" or "Extavia" or "betaferon" or "beneseron" or "beta 1-b interferon" or "recombinant interferon beta-1b" or "Rebif" or "Interferon-gamma" or immunoglobulin* or "immuno globulin*" or "immune-globulin*" or anakinra or kineret or Sarilumab or kevsara or regn88 or sar153191 or Siltuximab or sylvant or cnto328 or "cnto 328" or "tumor necrosis factor*" or "tumor necrosis serum*" or cachectin or cachetin or "anti-TNF-alpha" or "TNF alfa" or "TNF alpha" or anti-granulocyte macrophage or anti-GM-CSF or "GM CSF" or gmcsf or Flebogamma or Gamunex or "Globulin-N" or "Globulin N" or Intraglobin Gammagard or Gamimune or Gamimmune or Privigen or Sandoglobulin or Venoglobulin or "Venoglobulin-I" or "Venoglobulin I" or Venimmune or Iveegam or Alphaglobin or Endobulin or "Gamimune N" or "Gamimmune N" or Gammonativ or beriglobin or biggam or carimune or cuvitrु or gammagen or gammplex or gamunex or hizentra or kiovig or norga or panzyga or sandoglobulin* or subcuvia or venogamma or vigan or interleukin-2 or interleukin).tw.                                          |
| 9  | umifenovir/ or riamilovir/ or favipiravir/ or sofosbuvir/ or Arbidol/ or Galidesivir/                                                                                                                                                                                                                                                                                                                                                                                                                                                                                                                                                                                                                                                                                                                                                                                                                                                                                                                                                                                                                                                                                                                           |
| 10 | (Favipiravir or Triazavirin or Umifenovir or riamilovir or sofosbuvir or sofosbuvir or sovaldi or psi7851 or psi7976 or psi7977 or "EIDD-2801" or "EIDD 2801" or arbidol or Galidesivir or "immucillin A bcx4430" or "bcx 4430").tw.                                                                                                                                                                                                                                                                                                                                                                                                                                                                                                                                                                                                                                                                                                                                                                                                                                                                                                                                                                            |
| 11 | Darunavir/ or Lopinavir/ or Ritonavir/ or danoprevir/ or remdesivir/                                                                                                                                                                                                                                                                                                                                                                                                                                                                                                                                                                                                                                                                                                                                                                                                                                                                                                                                                                                                                                                                                                                                            |
| 12 | (ASC09 or Azvudine or Danoprevir or Darunavir or Lopinavir or ritonavir or Remdesivir or "gs 5734" or "gs5734" or prezista or "tmc 114" or tmc114 or "uic 94017" or uic94017 or abt378 or norvir).tw.                                                                                                                                                                                                                                                                                                                                                                                                                                                                                                                                                                                                                                                                                                                                                                                                                                                                                                                                                                                                           |
| 13 | baloxavir marboxil/ or baloxavir marboxil.tw.                                                                                                                                                                                                                                                                                                                                                                                                                                                                                                                                                                                                                                                                                                                                                                                                                                                                                                                                                                                                                                                                                                                                                                   |
| 14 | exp antimalarial agent/ or exp quinoline derivative/                                                                                                                                                                                                                                                                                                                                                                                                                                                                                                                                                                                                                                                                                                                                                                                                                                                                                                                                                                                                                                                                                                                                                            |
| 15 | (Amodiaquine or Basoquin or Camoquin or Flavoquine or Chloroquine or Resochin or Dawaquin or Lariago or Aarlen or Hydroxychloroquine or Hydroxy-chloroquine or chloroquinol or hydrochloroquine or hydrocloroquine or oxychloroquine or quensyl or "sn 8137" or ercoquin or Plaquenil or Hydroquin or Axemal or Dolquine or Quensyl or Quinoric or Imiquimiod or Aldara or Vyloma or Zyclara or Primaquine or Jasoprim or Malirid or Neo-Quipenyl or Pimaquin or Pmq or Primachina or Primacin or Primaquina or Primaquine or Primaquine or Remaquin or Tafenoquine or Krinfatel or Kozenis or Arakoda or Krintafel or Pamaquine or Plasmochin or Plasmoquine or Plsamaguine or Neo-Quipenyl or Primachin or Dihydroartemisinin or Mefloquine or lariam or laricam or mefliam or mephaquin* or tropicur or Nitazoxanide or Alinia or colufase or daxon or heliton or "salicylamide acetate" or nodik or "ph 5776" or ph5776 or ambilhar or "ba 32644" or ba32644 or "ciba 32644 ba" or "ciba 32644ba" or ciba32644ba or niradazol* or nitrothiamidazol* or nitrothiazole or "nsc 136947" or nsc136947 or yarocen or Nitrothiazole or Amokin or amokine or anoclor or aralan or aralen or arechin or arechine or |

### Comparative-effectiveness research of COVID-19 treatment: A rapid scoping review

|    |                                                                                                                                                                                                                                                                                                                                                                                                                                                                                                                                                                                                                                                                                                                                                                                                                                                                                                                                                                                                                                                                                                                                                |
|----|------------------------------------------------------------------------------------------------------------------------------------------------------------------------------------------------------------------------------------------------------------------------------------------------------------------------------------------------------------------------------------------------------------------------------------------------------------------------------------------------------------------------------------------------------------------------------------------------------------------------------------------------------------------------------------------------------------------------------------------------------------------------------------------------------------------------------------------------------------------------------------------------------------------------------------------------------------------------------------------------------------------------------------------------------------------------------------------------------------------------------------------------|
|    | arequine or arthrochin or arthrochine or arthroquine or artrichin or artrichine or artriquine or avloclor or bemaphata or bemaphate or bemasulph or bipiquin or cadiquin or chemochin or chemochine or chingamine or chingaminum or chloraquine or chlorochin or chlorochine or chlorofoz or chloroquin or chloroquin* or cidanchin or "clo-kit junior" or clorichina or clorichine or cloriquine or clorochina or delagil or delagyl or dichinalex or diclokin or diquinalex or diroquine or emquin or genocin or gontochin or gontochine or gontoquine or heliopar or imagon or iroquine or klorokin or klorokine or klorokinofosfat or lagaquin or malaquin or malarex or malarivon or malaviron or maliaquine or maquine or mesylith or mexaquin or mirquin or nivachine or nivaquin* or roquine or quinachl or quingamine or repal or resochen* or resochein or resoचना or resochine or resoचिनon resoquina or resoquine or reumachlor or roquine or rp3377 or sanoquin or sanoquine or silbesan or siragan or sirajan or sn7618 or solprina or solprine or tresochin or tresochine or tresoquine or trochin or trochine or troquine).tw. |
| 16 | suramin/                                                                                                                                                                                                                                                                                                                                                                                                                                                                                                                                                                                                                                                                                                                                                                                                                                                                                                                                                                                                                                                                                                                                       |
| 17 | (Carriomycin or Suramin).tw.                                                                                                                                                                                                                                                                                                                                                                                                                                                                                                                                                                                                                                                                                                                                                                                                                                                                                                                                                                                                                                                                                                                   |
| 18 | exp steroid/ or exp meprednisone/ or exp corticosteroid/ or fingolimod/ or leflunomide/ or thalidomide/                                                                                                                                                                                                                                                                                                                                                                                                                                                                                                                                                                                                                                                                                                                                                                                                                                                                                                                                                                                                                                        |
| 19 | (steroid* or methylprednisone or meprednisone or Prednisolone or Fluprednisolone or Corticosteroid* or Fingolimod or Leflunomid* or Thalidomid*).tw.                                                                                                                                                                                                                                                                                                                                                                                                                                                                                                                                                                                                                                                                                                                                                                                                                                                                                                                                                                                           |
| 20 | ruxolitinib/                                                                                                                                                                                                                                                                                                                                                                                                                                                                                                                                                                                                                                                                                                                                                                                                                                                                                                                                                                                                                                                                                                                                   |
| 21 | (Jakotinib or Ruxolitinib).tw.                                                                                                                                                                                                                                                                                                                                                                                                                                                                                                                                                                                                                                                                                                                                                                                                                                                                                                                                                                                                                                                                                                                 |
| 22 | exp monoclonal antibody/                                                                                                                                                                                                                                                                                                                                                                                                                                                                                                                                                                                                                                                                                                                                                                                                                                                                                                                                                                                                                                                                                                                       |
| 23 | (Ruxolitinib or Tocilizumab or Adalimumab or Camrelizumab or Eculizumab or Mepolizumab or "PD-1 mAb" or Tocilizumab or Adamumab or tozumab or meplazumab or monoclonal antibod*).tw.                                                                                                                                                                                                                                                                                                                                                                                                                                                                                                                                                                                                                                                                                                                                                                                                                                                                                                                                                           |
| 24 | ("SARS-Cov-2 specific neutralizing antibod*" or "SARS-Cov specific neutralizing antibod*" or "MERS-Cov specific neutralizing antibod*" or "Anti C5a monoclonal antibod*").tw.                                                                                                                                                                                                                                                                                                                                                                                                                                                                                                                                                                                                                                                                                                                                                                                                                                                                                                                                                                  |
| 25 | acetylcysteine/ or exp angiotensin receptor antagonist/ or exp angiotensin derivative/ or exp dipeptidyl carboxypeptidase inhibitor/ or citrate potassium/ or glycyrrhizic acid/ or dipyridamole/ or hydrogen peroxide/ or polyinosinic polycytidylic acid/ or thymosin/ or ascorbic acid/                                                                                                                                                                                                                                                                                                                                                                                                                                                                                                                                                                                                                                                                                                                                                                                                                                                     |
| 26 | (Acetylcysteine or Angiotensin or Angiotensin or "ACE inhibitor*" or ACE-2 or "Angiotensin II receptor blocker*" or ARBs or "potassium citrate" or Bromhexine or "Diammonium glycyrrhizinate" or Glycyrrhizic or Dipyridamole or Ebastine or "Hydrogen peroxide" or Pirfenidone or Polyinosinic-polycytidylic or "Polyinosinic-polycytidylic" or "Poly I-C" or "rhG-CSF" or Thymosin* or Tranilast or "Vitamin C" or "Ascorbic Acid*").tw.                                                                                                                                                                                                                                                                                                                                                                                                                                                                                                                                                                                                                                                                                                     |
| 27 | ("inhal*" adj2 gas*).tw.                                                                                                                                                                                                                                                                                                                                                                                                                                                                                                                                                                                                                                                                                                                                                                                                                                                                                                                                                                                                                                                                                                                       |
| 28 | Cyclosporine/                                                                                                                                                                                                                                                                                                                                                                                                                                                                                                                                                                                                                                                                                                                                                                                                                                                                                                                                                                                                                                                                                                                                  |

**Comparative-effectiveness research of COVID-19 treatment: A rapid scoping review**

|    |                                                                                                                                                                                                                                                                                                                                                                                                                                                                                                                                                                                                                                                                                                                                                                                                                                                                                                                                                                                                                                                                                                                                                                                                                                                                                                                                                                                                                                                                                                                    |
|----|--------------------------------------------------------------------------------------------------------------------------------------------------------------------------------------------------------------------------------------------------------------------------------------------------------------------------------------------------------------------------------------------------------------------------------------------------------------------------------------------------------------------------------------------------------------------------------------------------------------------------------------------------------------------------------------------------------------------------------------------------------------------------------------------------------------------------------------------------------------------------------------------------------------------------------------------------------------------------------------------------------------------------------------------------------------------------------------------------------------------------------------------------------------------------------------------------------------------------------------------------------------------------------------------------------------------------------------------------------------------------------------------------------------------------------------------------------------------------------------------------------------------|
| 29 | (Cyclosporin or cequa or "cgc 1072" or "cgc1072" or ciclomulsion or cyclasol or de076 or deximune or implanta or imusporin or neuro-stat or neurostat or opsisorin or "otx 101" or padciclo or papilock or "sp 14019" or verkazia).tw.                                                                                                                                                                                                                                                                                                                                                                                                                                                                                                                                                                                                                                                                                                                                                                                                                                                                                                                                                                                                                                                                                                                                                                                                                                                                             |
| 30 | Fenretinide/                                                                                                                                                                                                                                                                                                                                                                                                                                                                                                                                                                                                                                                                                                                                                                                                                                                                                                                                                                                                                                                                                                                                                                                                                                                                                                                                                                                                                                                                                                       |
| 31 | (fenretinide or "mcn r 1967" or "4 hydroxyphenylretinamide" or Ifendopril).tw.                                                                                                                                                                                                                                                                                                                                                                                                                                                                                                                                                                                                                                                                                                                                                                                                                                                                                                                                                                                                                                                                                                                                                                                                                                                                                                                                                                                                                                     |
| 32 | Dalteparin/ or enoxaparin/ or tinzaparin/ or fondaparinux/ or edoxaban/ or rivaroxaban/ or apixaban/ or betrixaban/ or heparin/ or danaparoid/ or warfarin/ or dabigatran.hw.                                                                                                                                                                                                                                                                                                                                                                                                                                                                                                                                                                                                                                                                                                                                                                                                                                                                                                                                                                                                                                                                                                                                                                                                                                                                                                                                      |
| 33 | (dalteparin or fragmin* or "low liquemin" or enoxaparin or clexan or clexane or inhixa or lexane or lovenox or neoparin or neoparin-nx or thorinane or tinzaparin or innohep or logiparin or fondaparinux or quixidar or dabigatran or edoxaban or lixiana or roteas or savaysa or rivaroxaban or xarelto or "bay 59 7939" or apixaban or eliques or eliquis or warfarin or adoisine or carfin or coumadan or coumadin* or marevan or panwarfarin or panwarfin or sofarin or warnerin or betrixaban or bevyxxa or dexxience or heparin or Disebrin or hepalean or lipo-hepin or menaven or multiparin or nevparin or panheparin or panheprin or praecivenin or thrombareduct or thromboliquine or vetren or danaparoid or lomoparan or orgaran).tw.                                                                                                                                                                                                                                                                                                                                                                                                                                                                                                                                                                                                                                                                                                                                                                |
| 34 | (Azilsartan or candesartan or eprosartan or Irbesartan or telmisartan or valsartan or losartan or olmesartan).hw. or cobicistat/ or losartan/                                                                                                                                                                                                                                                                                                                                                                                                                                                                                                                                                                                                                                                                                                                                                                                                                                                                                                                                                                                                                                                                                                                                                                                                                                                                                                                                                                      |
| 35 | (Azilsartan or Edarbi or "tak 536" or tak536 or candesartan or amcandin or amlodipine or amlopres or camlostar or candam or candeamio or candezek or caramlo or framsyl or unisia or zenicamo or Atacand or eprosartan or epratenz or futuran or naviten or navixen or regulaten or "skf 108566" or "skf108566" or tevesten or tevetan or teveten or tevetenz or Irbesartan or irbertan or Avapro or telmisartan or approvel or aprovel or "arbez lr" or avapro or ifirmasta or irban or irbetan or iretensa or irovel or irvell or karvea or saberverl or Micardis or valsartan or Diovan* or Prexxartan or saval or losartan or Cozaar or entrizen or lavestra or lorista or Olmesartan or Benicar or sarten or entresto or sacubitril or valsartan or byvalson or nebivolol or Aviptadil or Losartan or cozaar or cobicistat or tybost or actelsar or kinzal mono or kinzalmono or micardis or predxal or pritor or pritoral or semintra or telma-20 or tolura or angiosan or cordinate or dalzad ordiovan or diovine or kalpress or miten or nisis or prexxartan or provas or rixil or saval or tareg or tazea or troval or valpression or vals or valsocard or valtan or valtsu or alteis or belsar or benetor or benevas or benicar or cs866 or ixia or laresin or mencord or mesar or olartan or olmeblo or olmec or olmes or Olmesartan or olmetec or olupresor olsar or omesar or openvas or plaunac or rnh6270 or santini or sarten or tensar or tensiol or vivactra or votum or byvalson or cozaar).tw. |
| 36 | (benazepril or Captopril or Cilazapril or Enalapril or Fosinopril or Lisinopril or Perindopril Quinapril or Ramipril or Trandolapril).hw.                                                                                                                                                                                                                                                                                                                                                                                                                                                                                                                                                                                                                                                                                                                                                                                                                                                                                                                                                                                                                                                                                                                                                                                                                                                                                                                                                                          |
| 37 | (Benazepril or Lotensin or Captopril or Benace or boncordin or briem or brien or "cgs 148241" or "cgs 14824a" or "cgs148241" or "cgs14824a" or cibace or cibacen* or fortekor or lotensin or tenkuoren or zinadril or ace-bloc or acenorm or acepress or acepril or aceprilex or aceril or aceten or adocor or alopresin or altran or apuzin or asisten or capace or capocard or caposan or capoten* capotril or capril or captace or captensin or capti or captoflux or captohexal or captolane or captomax or capton or captopren or captoprilan or captoril or captral or cardiopril or cardipril or                                                                                                                                                                                                                                                                                                                                                                                                                                                                                                                                                                                                                                                                                                                                                                                                                                                                                                            |

### Comparative-effectiveness research of COVID-19 treatment: A rapid scoping review

|    |                                                                                                                                                                                                                                                                                                                                                                                                                                                                                                                                                                                                                                                                                                                                                                                                                                                                                                                                                                                                                                                                                                                                                                                                                                                                                                                                                                                                                                                                                                                                                     |
|----|-----------------------------------------------------------------------------------------------------------------------------------------------------------------------------------------------------------------------------------------------------------------------------------------------------------------------------------------------------------------------------------------------------------------------------------------------------------------------------------------------------------------------------------------------------------------------------------------------------------------------------------------------------------------------------------------------------------------------------------------------------------------------------------------------------------------------------------------------------------------------------------------------------------------------------------------------------------------------------------------------------------------------------------------------------------------------------------------------------------------------------------------------------------------------------------------------------------------------------------------------------------------------------------------------------------------------------------------------------------------------------------------------------------------------------------------------------------------------------------------------------------------------------------------------------|
|    | catona or catoplin or catopril or cesplon or cryopril or debax or dexacap or dextro captopril or ecapres or ecaten or epicordin or epsitron or farcopril or farmoten or hiperil or hypopress or hypotensor or insucar or iopril or isopresol or katopil or ketanine or keyerpril or lapril or locap or lopirin or lopril or medepres or midrat or minitent or nolectin or "oltens ge" or petacilon or praten or primace or rilcapton or ropril or smarten or tenofax or tensicap tensiomen or tensiomin or tensobon or tensoprel or tensoril or tenzib or topace or toprilem or typril-ace or vasosta or zapto or orkaptil or Cilazapril or dynorm or inhibace or inibace or initiss or inocar).tw.                                                                                                                                                                                                                                                                                                                                                                                                                                                                                                                                                                                                                                                                                                                                                                                                                                                 |
| 38 | (justor or vasace or Enalapril or Vasotec or bpnorm or dynacil or eliten or fosenopril or fosinil or fosinonorm or fosinopril or fosinorm or fosipres or fositen or fositens or fovas or fozitec or monopril or newace or sapril or sq28555 or staril or vasopril or acerbon or alapril or alfaken or carace or cipril or coric or dapril or fibsol or inopril or linopril or linvas or lipril or lisi abz orlisibeta or lisigamma or lisihexal or lisinopril dihydrate or lisipril or lisodur or lisopress or lisopril orlisoril or lispril or listril or lysinopril or "mk 0521" or "mk 521" or "mk 522" or "mk0521or mk521" or "mk522" or noperten or novatec or presiten or prinil or prinivil or qbrelis or sinopril or tensopril or tensyn or vivatec or zestomax or zestril or Monopri or Lisinopril or Prinivil or Zestril or Perindopril or Coversyl or Quinapril or Accupril or accuprin or accupro or accupron or acequin or acutel or acuprel or acupril or asig or "ci906" or conan or ectren or korec or quinalapril or quinateen or quinazi or quinhexal or quinipril or Ramipril or acovil or altace or carasel or cardace or corpril or delix or "hoe 498" or hypren or hytren or lostapres or ramace or ramilich or triatec or tritace or unipril or vesdil or vivace or Altace or Trandolapril or Mavik or gopten or Odace or odric or udrik).tw.                                                                                                                                                                                |
| 39 | Colistin/ or (Teicoplanin or Ivermectin or azithromycin).hw.                                                                                                                                                                                                                                                                                                                                                                                                                                                                                                                                                                                                                                                                                                                                                                                                                                                                                                                                                                                                                                                                                                                                                                                                                                                                                                                                                                                                                                                                                        |
| 40 | (Colistin or belcomycin or colimycin* or belcomycin or Colicort or colimycin or colistine or colomycin or coly mycin or colymicin or multimycin or polymyxin or Teicoplanin or planium or tagocid or talinac or tapocin or targocid or targoplanin or targosid or teichomycin or teichoplanin or teichoplanine or teicomid or teicopix or teiplamil or Planium or Tagocid or talinac or tapocin or targocid or targoplanin or targosid or teichomycin or teichomycin or teichoplanin* or teicomid or teicopix or teiplamil or Ivermectin or Avermectin or cardomec or diapec or efecti or epimekor or eqvalan or eqvalenor or ivermectina or ivermectol or ivexterm or ivomec or mectizan or "mk 933" or "mk933" or oramec or quanox or revectina or seguro or sklice or soolantra or stromectol or azithromycin or aruzilina or atizor or azadose or azasite or azatril or azenil or azibiot or azimin or azithral or azithromycin or azitrocin or azitromax azitromicin* or aziwok or azomyne or aztrin or azydrop or azyter or azithromycin or bazyt or "cp 62933" or "cp 62993" or "cp62933" or "cp62993" or erythromycin or Forcin or Inedol or infectoazit or "isv 401" or "isv401" or kromicin or macrozit or mezatrin or octavax or ordipha or ribotrex or sumamed or tobyl or tromix or trozocina or ultreon or vinzam or xithrone or "xz 450" or "xz450" or Zaret or Zarom or zetamax or zeto or zibramax or zifin or zimericina or zistic or zithromax or zithrox or zitinn or zitrim or zitrobifan or zitrocin or zitromax or zmax).tw. |
| 41 | Tamoxifen.hw. or dasatinib/ or Epirubicin/ or Gemcitabine/ or Homoharringtonin/ or Imatinib/ or toremifene/ or Valrubicin/                                                                                                                                                                                                                                                                                                                                                                                                                                                                                                                                                                                                                                                                                                                                                                                                                                                                                                                                                                                                                                                                                                                                                                                                                                                                                                                                                                                                                          |
| 42 | (dasatinib or Ellence or Epirubicin* or epid or epifil or epiham or epilem or epirubicine or farmorrubicina or farmorubicin or pharmorubicin or Gemcitabine or difluorodeoxycytidine or Gemcite or gemtro or gemzar or infugem or "ly188011" or Homoharringtonine or harringtonine                                                                                                                                                                                                                                                                                                                                                                                                                                                                                                                                                                                                                                                                                                                                                                                                                                                                                                                                                                                                                                                                                                                                                                                                                                                                  |

### Comparative-effectiveness research of COVID-19 treatment: A rapid scoping review

|    |                                                                                                                                                                                                                                                                                                                                                                                                                                                                                                                                                                                                                                                                                                                                                                                                                                                                                                                                                                                                                                 |
|----|---------------------------------------------------------------------------------------------------------------------------------------------------------------------------------------------------------------------------------------------------------------------------------------------------------------------------------------------------------------------------------------------------------------------------------------------------------------------------------------------------------------------------------------------------------------------------------------------------------------------------------------------------------------------------------------------------------------------------------------------------------------------------------------------------------------------------------------------------------------------------------------------------------------------------------------------------------------------------------------------------------------------------------|
|    | or omacetaxine or ceftalonin or omapro or synribo or Imatinib or "cgp 57148" or "cgp57148b" or gleevac or gleevec or glivec or glivic or ruvise or Tamoxifen or ebefen or kessar or tamoplac or tamoxasta or tamoxifene or toremifene or estrimex or fareston or fc1157a or Valrubicin or valstar or valtaxin).tw.                                                                                                                                                                                                                                                                                                                                                                                                                                                                                                                                                                                                                                                                                                              |
| 43 | Disulfiram/ or Emetine/ or Clomipramine/ or Loperamide/ or Caspofungin/ or Terconazole/ or Colchicine/ or Promethazine/ or Azelastine/ or Aprepitant/ or Chlorpromazine/ or Icatibant/ or Bepotastine/ or prostacyclin/ or Vapreotide/ or Conivaptan/ or Nitric oxide/ or (Perphenazine or Metformin).hw.                                                                                                                                                                                                                                                                                                                                                                                                                                                                                                                                                                                                                                                                                                                       |
| 44 | (Disulfiram or antabus or Antabuse or esperal or disulfizam or Emetine or Emetin or Clomipramine or Anafranil or anafranilin or anafranyl or clomicalm or hydiphen or Loperamide or immodium or Caspofungin or Cancidas or Terconazole or fungistat or terazol or "r 42470or Colchicine" or colchysat or mitigare or "nsc 757" or Promethazine or allerfen or antiallersin or atosil or fenergan or hiberna or Phenergan or Pipolphen or Prothazine or Romergan or Sayomol or Azelastine or Astelin or "a5610 or afluon" or alerdual or alergodil or allergodrop or allergospray or allespray or allestin or astepto or azedil or azelamed or azelavision or azeper or azeptin or carelastin or corifina or "e 0659" or "e0659" or lasticom or lastin or lastinaz or loxin or oculastin or optivar or pollival or proallergodil or radethacin or radethazin or rhinolast or rinelaz or tebarat or visuzel or vividrin or vivispray or Aprepitant or cinvanti or emend or aprepitant or "1754030" or "mk 0869" or "ono7436").tw. |
| 45 | (Perphenazine or decentan or etaperazine or ethaperazine or "sch 3940" or thilatazin or tranquisan or trifalon or trilafan or trilafon or trilifan or triliphan or Chlorpromazine or hiberna or contomin or largactil or megaphen or neurazine or plegomazin or promacid or promapar or propaphenin or solidon or sonazine or tarocitil or "thor prom" or thorazine or vegetamin or zuledin or Icatibant or firazyr or Metformin or diabetosan or diabex or dianben or diformin or fluamine or flumamine or fortamet or glifage or gliguanid or glucoformin or gluconil or glucophage or glucophage-mite or glucostop or glukophage or glumetza or haurymellin or meguan or merckformin or metforal or metformax or metiguanide or riomet or risidon or siofor or Bepotastine or bepreve or talion or Epoprostenol or prostacyclin or caripul or cycloprostin or epoprostenol or flolan or Vapreotide or doctised or octastatin or Conivaptan or vaprisol or "Nitric oxide" or inomax or noxivent).tw.                          |
| 46 | (convalescence/ and plasma transfusion/) or (Convalesc* adj2 plasma).tw.                                                                                                                                                                                                                                                                                                                                                                                                                                                                                                                                                                                                                                                                                                                                                                                                                                                                                                                                                        |
| 47 | Natural killer cell/ or exp mesenchymal stem cell/                                                                                                                                                                                                                                                                                                                                                                                                                                                                                                                                                                                                                                                                                                                                                                                                                                                                                                                                                                              |
| 48 | ("Recombinant human ACE-2" or "APN0" or "Natural killer cell" or "natural killer cells" or "NK cell" or "NK cells" or mesenchymal).tw.                                                                                                                                                                                                                                                                                                                                                                                                                                                                                                                                                                                                                                                                                                                                                                                                                                                                                          |
| 49 | Arbidol/ or Galidesivir/                                                                                                                                                                                                                                                                                                                                                                                                                                                                                                                                                                                                                                                                                                                                                                                                                                                                                                                                                                                                        |
| 50 | (arbidol or Galidesivir or "immucillin A bcx4430" or "bcx 4430").tw.                                                                                                                                                                                                                                                                                                                                                                                                                                                                                                                                                                                                                                                                                                                                                                                                                                                                                                                                                            |
| 51 | n methyl dextro aspartic acid receptor blocking agent/                                                                                                                                                                                                                                                                                                                                                                                                                                                                                                                                                                                                                                                                                                                                                                                                                                                                                                                                                                          |
| 52 | ("n methyl dextro aspartic acid receptor" or "n methyl d aspartate a" or " NMDA antagonist*" or " NMDA inhibitor*" or " NMDA block*" or " NMDA receptor*").tw.                                                                                                                                                                                                                                                                                                                                                                                                                                                                                                                                                                                                                                                                                                                                                                                                                                                                  |

### Comparative-effectiveness research of COVID-19 treatment: A rapid scoping review

|    |                                                                                                                                                                                                                                                                                                                                    |
|----|------------------------------------------------------------------------------------------------------------------------------------------------------------------------------------------------------------------------------------------------------------------------------------------------------------------------------------|
| 53 | or/7-52                                                                                                                                                                                                                                                                                                                            |
| 54 | 6 and 53                                                                                                                                                                                                                                                                                                                           |
| 55 | exp experimental organism/ or animal tissue/ or animal cell/ or exp animal disease/ or exp carnivore disease/ or exp bird/ or exp experimental animal welfare/ or exp animal husbandry/ or animal behavior/ or exp animal cell culture/ or exp mammalian disease/ or exp mammal/ or exp marine species/ or nonhuman/ or animal.hw. |
| 56 | 55 not human/                                                                                                                                                                                                                                                                                                                      |
| 57 | 54 not 56                                                                                                                                                                                                                                                                                                                          |
| 58 | limit 57 to dd=20210131-20210518                                                                                                                                                                                                                                                                                                   |
| 59 | limit 58 to yr="2021"                                                                                                                                                                                                                                                                                                              |

Search run on July 9, 2021 using the Ovid platform, Embase database. Search was limited by date range, from January 31, 2021 to May 18, 2021, and run in database to update an existing search from May 01, 2020 to January 31, 2021.

#### Appendix 3. List of drugs from Health Canada and Public Health Agency of Canada

| Categories                            | Drug names/descriptions                                                                                                                                                                                                                                                                                                                                                                                                                                                                                                                                                                                                                                                                                                                                                                                                                     |
|---------------------------------------|---------------------------------------------------------------------------------------------------------------------------------------------------------------------------------------------------------------------------------------------------------------------------------------------------------------------------------------------------------------------------------------------------------------------------------------------------------------------------------------------------------------------------------------------------------------------------------------------------------------------------------------------------------------------------------------------------------------------------------------------------------------------------------------------------------------------------------------------|
| ACE Inhibitors                        | <ul style="list-style-type: none"> <li>Benazepril (Lotensin), Captopril (Capoten), Cilazapril (Inhibace), Enalapril (Vasotec), Fosinopril (Monopril), Lisinopril (Prinivil, Zestril), Perindopril (Coversyl), Quinapril (Accupril), Ramipril (Altace), Trandolapril (Mavik)</li> </ul>                                                                                                                                                                                                                                                                                                                                                                                                                                                                                                                                                      |
| Angiotensin II Receptor Blocker (ARB) | <ul style="list-style-type: none"> <li>Azilsartan (Edarbi), candesartan (Atacand), eprosartan (Teveten), irbesartan (Avapro), telmisartan (Micardis), valsartan (Diovan, Prexxartan), losartan (Cozaar), olmesartan (Benicar), entresto (sacubitril/valsartan), byvalson (nebivolol/valsartan),</li> </ul>                                                                                                                                                                                                                                                                                                                                                                                                                                                                                                                                  |
| Antibiotics/antiparasitic             | <ul style="list-style-type: none"> <li>Suramin, Carriomycin, Suramin sodium, Colistin, Teicoplanin, Ivermectin, azithromycin</li> </ul>                                                                                                                                                                                                                                                                                                                                                                                                                                                                                                                                                                                                                                                                                                     |
| Antibodies                            | <ul style="list-style-type: none"> <li>SARS-Cov-2 specific neutralizing antibodies</li> <li>Bevicizumab, Ruxolitinib, Tocilizumab, Adalimumab, Camrelizumab, Eculizumab, Mepolizumab, "PD-1 mAb", Tocilizumab, tozumab, abciximab (Reopro), adalimumab (Humira/Amjevita), alefacept (Amevive), alemtuzumab (Campath), basiliximab (Simulect), belimumab (Benlysta), bezlotoxumab (Zinplava), canakinumab (Ilaris), certolizumab (Cimzia), cetuximab (Erbix), daclizumab (Zenapax/Zinbryta), denosumab (Prolia/Xgeva), efalizumab (Raptiva), golimumab (Simponi), inflectra (Remicade), ipilimumab (Yervoy), ixekizumab (Taltz), natalizumab (Tysabri), nivolumab (Opdivo), olaratumab (Lartruvo), omalizumab (Xolair), palivizumab (Synagis), panitumumab (Vectibix), pembrolizumab (Keytruda), rituximab (Rituxan), tocilizumab</li> </ul> |



## Comparative-effectiveness research of COVID-19 treatment: A rapid scoping review

|                             |                                                                                                                                                                                                                                                                                                                                                                                                                                                                                                                                                                                                                                                                                                                                                                                                                                                                                                                                                                                                                                                                                                                                                                                                                                                                                                                                                                             |
|-----------------------------|-----------------------------------------------------------------------------------------------------------------------------------------------------------------------------------------------------------------------------------------------------------------------------------------------------------------------------------------------------------------------------------------------------------------------------------------------------------------------------------------------------------------------------------------------------------------------------------------------------------------------------------------------------------------------------------------------------------------------------------------------------------------------------------------------------------------------------------------------------------------------------------------------------------------------------------------------------------------------------------------------------------------------------------------------------------------------------------------------------------------------------------------------------------------------------------------------------------------------------------------------------------------------------------------------------------------------------------------------------------------------------|
|                             | (Actemra/ RoActemra), trastuzumab (Herceptin), secukinumab (Cosentyx), ustekinumab (Stelara), Meplazumab                                                                                                                                                                                                                                                                                                                                                                                                                                                                                                                                                                                                                                                                                                                                                                                                                                                                                                                                                                                                                                                                                                                                                                                                                                                                    |
| Anticancer/chemotherapy     | <ul style="list-style-type: none"> <li>• Dasatinib, Epirubicin, Gemcitabine hydrochloride, Homoharringtonine, Imatinib mesylate, Tamoxifen, Toremifene, Valrubicin</li> </ul>                                                                                                                                                                                                                                                                                                                                                                                                                                                                                                                                                                                                                                                                                                                                                                                                                                                                                                                                                                                                                                                                                                                                                                                               |
| Anticoagulants              | <ul style="list-style-type: none"> <li>• dalteparin, enoxaparin, tinzaparin, fondaparinux heparin, dabigatran, edoxaban, rivaroxaban, apixaban, warfarin, betrixaban, heparin, danaparoid</li> </ul>                                                                                                                                                                                                                                                                                                                                                                                                                                                                                                                                                                                                                                                                                                                                                                                                                                                                                                                                                                                                                                                                                                                                                                        |
| Antimalarials               | <ul style="list-style-type: none"> <li>• Amodiaquine, Basoquin, Camoquin, Flavoquine, Chloroquine, Resochin, Dawaquin, Lariago, Aarlen, Hydroxychloroquine, Hydroxy-chloroquine, Plaquenil, Hydroquin, Axemal, Dolquine, Quensyl, Quinoric, Imiquimod, Aldara, Vyloma,, Zyclara, Primaquine, Jasoprim, Malirid, Neo-Quipenyl, Pimaquin, Pmq, Primachina, Primacin, Primaquina, Primaquine, Primaquine, Remaquin, Tafenoquine, Krinfatel, Kozenis, Arakoda, Krintafel, Pamaquine, Plasmochin, Plasmoquine, Plsamaguine, Neo-Quipenyl, Primachin, Dihydroartemisinin, mefloquine, Nitazoxanide, Nitrothiazole</li> </ul>                                                                                                                                                                                                                                                                                                                                                                                                                                                                                                                                                                                                                                                                                                                                                      |
| Antiviral – Direct acting   | <ul style="list-style-type: none"> <li>• Protease inhibitors: boceprevir, telaprevir, lopinavir, ritonavir, lopinavir/ritonavir (Kaletra), darunavir/cobicistat (Prezcobix), indinavir (Crixivan), saquinavir (Invirase)</li> <li>• Integrase inhibitors: raltegravir, elvitegravir, dolutegravir</li> <li>• Entry (fusion) inhibitors: maraviroc (celsentri)</li> <li>• Nucleoside reverse transcriptase inhibitors: abacavir, ziagen, emtricitabine, emtriva, lamivudine, epivir, tenofovir (Viread), zidovudine, azidothymidine, retrovir</li> <li>• Nonnucleoside reverse transcriptase inhibitors : , doravirine, pifeltro, efavirenz, sustiva, etravirine, intelence, nevirapine, viramune, rilpivirine, edurant</li> <li>• Acyclic nucleoside phosphonate analogues: cidofovir diphosphates</li> <li>• Acyclic guanosine analogues: acyclovir</li> <li>• Pyrophosphate analogues: foscarnet, fomivirsen</li> <li>• Oligonucleotides</li> <li>• Nucleotide analog inhibitor: sofosbuvir</li> <li>• Nucleoside inhibitor: ribavirin (Ibavyr)</li> <li>• Matrix 2 protein inhibitors: amantadine</li> <li>• RNA polymerase inhibitors: Rimantadine</li> <li>• Neuraminidase inhibitors: oseltamivir (Tamiflu), peramivir (Rapivab), zanamivir (Relenza)</li> <li>• Antiretrovirals: ASC09, Azvudine, Danoprevir, Darunavir, Lopinavir, ritonavir, Remdesivir</li> </ul> |
| Antiviral – Other           | <ul style="list-style-type: none"> <li>• Baloxavir, marboxil, EIDD-2801</li> </ul>                                                                                                                                                                                                                                                                                                                                                                                                                                                                                                                                                                                                                                                                                                                                                                                                                                                                                                                                                                                                                                                                                                                                                                                                                                                                                          |
| Antivirals – Broad spectrum | <ul style="list-style-type: none"> <li>• Favipiravir, Triazavirin, Umifenovir (arbidol hydrochloride), Galidesivir</li> </ul>                                                                                                                                                                                                                                                                                                                                                                                                                                                                                                                                                                                                                                                                                                                                                                                                                                                                                                                                                                                                                                                                                                                                                                                                                                               |

## Comparative-effectiveness research of COVID-19 treatment: A rapid scoping review

|                                                           |                                                                                                                                                                                                                                                                                                                                                                                                                                                                                                                                                                                                                                                                                                                                                                                                                                                                                                                                                                                                                                                                                                                                                  |
|-----------------------------------------------------------|--------------------------------------------------------------------------------------------------------------------------------------------------------------------------------------------------------------------------------------------------------------------------------------------------------------------------------------------------------------------------------------------------------------------------------------------------------------------------------------------------------------------------------------------------------------------------------------------------------------------------------------------------------------------------------------------------------------------------------------------------------------------------------------------------------------------------------------------------------------------------------------------------------------------------------------------------------------------------------------------------------------------------------------------------------------------------------------------------------------------------------------------------|
| Immune support/modulating                                 | <ul style="list-style-type: none"> <li>• Convalescent plasma</li> <li>• Recombinant human ACE-2: APN01</li> <li>• Natural killer (NK) cells</li> <li>• Mesenchymal stem cells</li> <li>• Interferons: Interferon-alpha, Interferon-beta, Interferon-gamma, interferon <math>\beta</math> – 1b (Betaseron/Extavia), interferon beta – 1a (Rebif)</li> <li>• Intravenous Immunoglobulin: Flebogamma DIF; Gamunex; Globulin-N; Globulin N; Intraglobin; Intraglobin F, Gammagard; Gamimune; Gamimmune, Privigen; Sandoglobulin; Venoglobulin; Venoglobulin-I; Venoglobulin I; Venimmune; Iveegam; Alphaglobin; Endobulin; Gamimune N; Gamimmune N; Gammonativ</li> </ul>                                                                                                                                                                                                                                                                                                                                                                                                                                                                            |
| Interleukin Inhibitors                                    | <ul style="list-style-type: none"> <li>• Interleukin (IL)-1 Inhibitor: Anakinra</li> <li>• Interleukin (IL)-6 Inhibitors: Sarilumab (Kevzara); Siltuximab</li> <li>• Anti-Tumor necrosis factor-alpha (anti-TNF-alpha)</li> <li>• Anti-Granulocyte-macrophage colony-stimulating factor (anti-GM-CSF)</li> </ul>                                                                                                                                                                                                                                                                                                                                                                                                                                                                                                                                                                                                                                                                                                                                                                                                                                 |
| Kinase Inhibitors                                         | <ul style="list-style-type: none"> <li>• Baricitinib, Acalabrutinib (Calquence), Fedratinib, Ruxolitinib, Jakotinib, Ruxolitinib, Sunitinib, Erlotinib</li> </ul>                                                                                                                                                                                                                                                                                                                                                                                                                                                                                                                                                                                                                                                                                                                                                                                                                                                                                                                                                                                |
| Nonspecific anti-inflammatory and immunosuppressive drugs | <ul style="list-style-type: none"> <li>• Fingolimod Hydrochloride, Leflunomide, Thalidomide, Methylprednisone, Prednisolone, Fluprednisolone, Corticosteroids, Cyclosporin A, Glycyrrhizic Acid/Glycyrrhizic</li> </ul>                                                                                                                                                                                                                                                                                                                                                                                                                                                                                                                                                                                                                                                                                                                                                                                                                                                                                                                          |
| Other                                                     | <ul style="list-style-type: none"> <li>• Disulfiram (acetaldehyde dehydrogenase inhibitor), Emetine (alkaloid emetic), Clomipramine (antidepressant), Loperamide (antidiarrheal), Caspofungin (antifungal), Terconazole (antifungal), Colchicine (anti-gout agent), Promethazine hydrochloride (antihistamine), Azelastine (antihistamine), Aprepitant (anti-nausea/antiemetic), Perphenazine (antipsychotic), Chlorpromazine hydrochloride (antipsychotic), Icatibant (Bradykinin B2 Receptor Antagonists), Metformin (diabetes), Bepotastine (histamine 1 antagonist), Epoprostenol (prostaglandin), Vapreotide (somatostatin), Conivaptan (vasopressin inhibitor), Nitric oxide (vasodilator), Acetylcysteine (prodrug), Potassium citrate (alkalinizer), Dipyridamole (vasodilator), Hydrogen peroxide, Cobicistat (Tybost), Bromhexine (mucolytic), Ebastine (H1 receptor agonist), Pirfenidone (antifibrotic), Polyinosinic-polycytidylic (Poly I-C), rhG-CSF, Thymosin, Tranilast, Ascorbic Acid, Aviptadil (neuropeptide), Ifendopril (NMDA inhibitor), fenretinide (synthetic retinoid), famotidine (H2 receptor antagonist)</li> </ul> |

### Appendix 4. List of included primary studies

1. Abaleke E, Abbas M, Abbasi S, Abbott A, Abdelaziz A, Abdelbadiee S, et al. Azithromycin in patients admitted to hospital with COVID-19 (RECOVERY): a randomised, controlled, open-label, platform trial. *The Lancet*. 2021;397(10274):605-12.
2. Abbaspour Kasgari H, Moradi S, Shabani AM, Babamahmoodi F, Davoudi Badabi AR, Davoudi L, et al. Evaluation of the efficacy of sofosbuvir plus daclatasvir in combination with ribavirin for hospitalized COVID-19 patients with moderate disease

**Comparative-effectiveness research of COVID-19 treatment: A rapid scoping review**

- compared with standard care: a single-centre, randomized controlled trial. *Journal of Antimicrobial Chemotherapy*. 2020;75(11):3373-8.
3. Abd-Elsalam S, Esmail ES, Khalaf M, Abdo EF, Medhat MA, Abd El Ghafar MS, et al. Hydroxychloroquine in the treatment of COVID-19: a multicenter randomized controlled study. *The American Journal of Tropical Medicine and Hygiene*. 2020;103(4):1635.
  4. Abdulrahman A, AlSayed I, AlMadhi M, AlArayed J, Mohammed SJ, Sharif AK, Alansari K, AlAwadhi AI, AlQahtani M. The Efficacy and Safety of Hydroxychloroquine in Patients with COVID-19: A Multicenter National Retrospective Cohort. *Infect Dis Ther*. 2021 Mar;10(1):439-455..
  5. Abolghasemi H, Eshghi P, Cheraghali AM, Fooladi AAI, Moghaddam FB, Imanizadeh S, et al. Clinical efficacy of convalescent plasma for treatment of COVID-19 infections: Results of a multicenter clinical study. *Transfusion and Apheresis Science*. 2020;59(5):102875.
  6. Abuzakouk M, Saleh K, Algora M, Nusair A, Alameri J, Alshehhi F, et al. Convalescent Plasma Efficacy in Life-Threatening COVID-19 Patients Admitted to the ICU: A Retrospective Cohort Study. *Journal of clinical medicine*. 2021;10(10):2113.
  7. Agarwal A, Mukherjee A, Kumar G, Chatterjee P, Bhatnagar T, Malhotra P, et al. Page Convalescent plasma in the management of moderate COVID-19 in India: An open-label parallel-arm phase II multicentre randomized controlled trial (PLACID Trial).
  8. Agusti A, Guillen E, Ayora A, Anton A, Aguilera C, Vidal X, et al. Efficacy and safety of hydroxychloroquine in healthcare professionals with mild SARS-CoV-2 infection: Prospective, non-randomized trial. *Enfermedades Infecciosas Y Microbiología ClíNica*. 2020.
  9. ah Yoon H, Bartash R, Gendlina I, Rivera J, Nakouzi A, Bortz Iii RH, et al. Treatment of severe COVID-19 with convalescent plasma in Bronx, NYC. *JCI insight*. 2021;6(4).
  10. Ahmed S, Karim MM, Ross AG, Hossain MS, Clemens JD, Sumiya MK, et al. A five-day course of ivermectin for the treatment of COVID-19 may reduce the duration of illness. *International Journal of Infectious Diseases*. 2021;103:214-6.
  11. Alam MM, Mahmud S, Aggarwal S, Fathma S, Al Mahi N, Shibli MS, et al. Clinical Impact of the Early Use of Monoclonal Antibody LY-CoV555 (Bamlanivimab) on Mortality and Hospitalization Among Elderly Nursing Home Patients: A Multicenter Retrospective Study. *Cureus*. 2021;13(5).
  12. Albani F, Fusina F, Giovannini A, Ferretti P, Granato A, Prezioso C, et al. Impact of azithromycin and/or hydroxychloroquine on hospital mortality in COVID-19. *Journal of clinical medicine*. 2020;9(9):2800.
  13. Albani F, Fusina F, Granato E, Capotosto C, Ceracchi C, Gargaruti R, et al. Corticosteroid treatment has no effect on hospital mortality in COVID-19 patients. *Scientific reports*. 2021;11(1):1-6.
  14. Albani F, Sepe L, Fusina F, Prezioso C, Baronio M, Caminiti F, et al. Thromboprophylaxis with enoxaparin is associated with a lower death rate in patients hospitalized with SARS-CoV-2 infection. A cohort study. *EClinicalMedicine*. 2020;27:100562.

**Comparative-effectiveness research of COVID-19 treatment: A rapid scoping review**

15. Albertini L, Soletchnik M, Razurel A, Cohen J, Bidegain F, Fauvelle F, et al. Observational study on off-label use of tocilizumab in patients with severe COVID-19. *European Journal of Hospital Pharmacy*. 2021;28(1):22-7.
16. Allahyari A, Seddigh-Shamsi M, Mahmoudi M, Jamehdar SA, Amini M, Mozdourian M, et al. Efficacy and safety of convalescent plasma therapy in severe COVID-19 patients with acute respiratory distress syndrome. *International Immunopharmacology*. 2021;93:107239.
17. Almas T, Ehtesham M, Khan AW, Khedro T, Hussain S, Kaneez M, et al. Safety and efficacy of low-dose corticosteroids in patients with non-severe Coronavirus disease 2019: A retrospective cohort study. *Cureus*. 2021;13(1).
18. Almazrou SH, Almalki ZS, Alanazi AS, Alqahtani AM, Alghamd SM. Comparing the impact of Hydroxychloroquine based regimens and standard treatment on COVID-19 patient outcomes: A retrospective cohort study. *Saudi Pharmaceutical Journal*. 2020;28(12):1877-82.
19. AlQahtani M, Abdulrahman A, Almadani A, Alali SY, Al Zamrooni AM, Hejab AH, et al. Randomized controlled trial of convalescent plasma therapy against standard therapy in patients with severe COVID-19 disease. *Scientific reports*. 2021;11(1):1-8.
20. AlQahtani M, Abdulrahman A, Almadani A, Alali SY, Al Zamrooni AM, Hejab AH, et al. Randomized controlled trial of convalescent plasma therapy against standard therapy in patients with severe COVID-19 disease. *Scientific reports*. 2021;11(1):1-8.
21. Alsharidah S, Ayed M, Ameen RM, Alhuraish F, Rouheldeen NA, Alshammari FR, et al. COVID-19 convalescent plasma treatment of moderate and severe cases of SARS-CoV-2 infection: a multicenter interventional study. *International Journal of Infectious Diseases*. 2021;103:439-46.
22. AlShehry N, Zaidi SZA, AlAskar A, Al Odayani A, Alotaibi JM, AlSagheir A, et al. Safety and efficacy of convalescent plasma for severe COVID-19: interim report of a multicenter phase II study from Saudi Arabia. *Saudi Journal of Medicine & Medical Sciences*. 2021;9(1):16.
23. AlShehry N, Zaidi SZA, AlAskar A, Al Odayani A, Alotaibi JM, AlSagheir A, et al. Safety and efficacy of convalescent plasma for severe COVID-19: interim report of a multicenter phase II study from Saudi Arabia. *Saudi Journal of Medicine & Medical Sciences*. 2021;9(1):16.
24. Altuntas F, Ata N, Yigenoglu TN, Bascı S, Dal MS, Korkmaz S, et al. Convalescent plasma therapy in patients with COVID-19. *Transfusion and Apheresis Science*. 2021;60(1):102955.
25. Alvarez-Mon M, Asúnsolo Á, Sanz J, Munoz B, Arranz-Caso JA, Novella Mena M, et al. Tocilizumab efficacy in COVID-19 patients is associated with respiratory severity-based stages. 2021.
26. Ammar M, Gu S, Jiang W, Zhao H, Ammar A, Johnson J, et al. 9: Evaluation of Aerosolized Epoprostenol in COVID-19 ARDS Patients. *Critical Care Medicine*. 2021;49(1):5.
27. An MH, Kim MS, Kim B-O, Kang SH, Kimn WJ, Park SK, et al. Treatment response to hydroxychloroquine and antibiotics for mild to moderate COVID-19: a retrospective cohort study from South Korea. *medRxiv*. 2020.
28. Angus DC, Derde L, Al-Beidh F, Annane D, Arabi Y, Beane A, et al. Effect of hydrocortisone on mortality and organ support in patients with severe COVID-19: the

**Comparative-effectiveness research of COVID-19 treatment: A rapid scoping review**

- REMAP-CAP COVID-19 corticosteroid domain randomized clinical trial. *Jama*. 2020;324(13):1317-29.
29. Annane D, Heming N, Grimaldi-Bensouda L, Frémeaux-Bacchi V, Vigan M, Roux A-L, et al. Eculizumab as an emergency treatment for adult patients with severe COVID-19 in the intensive care unit: a proof-of-concept study. *EClinicalMedicine*. 2020;28:100590.
  30. Annie FH, Sirbu C, Frazier KR, Broce M, Lucas Jr BD. Hydroxychloroquine in Hospitalized Patients with COVID- 19: Real- World Experience Assessing Mortality. *Pharmacotherapy: The Journal of Human Pharmacology and Drug Therapy*. 2020;40(11):1072-81.
  31. Annweiler C, Hanotte B, de l'Eprevier CG, Sabatier J-M, Lafaie L, Célarier T. Vitamin D and survival in COVID-19 patients: a quasi-experimental study. *The Journal of steroid biochemistry and molecular biology*. 2020;204:105771.
  32. Antonov V, Ignatova G, Pribytkova O, Sleptsova S, Strebkova E, Khudyakova E, et al. Experience of olokizumab use in COVID-19 patients. *Terapevticheskii arkhiv*. 2020;92(12):148-54.
  33. Anwar F, Kuriakose B, Khadija S, Hamad M, Satiregun M, Ali L, et al. 219: Mechanically Ventilated Patients With SARS-CoV-2 Infection: A Single-Institution Analysis. *Critical Care Medicine*. 2021;49(1):95.
  34. Aomar-Millán IF, Salvatierra J, Torres-Parejo Ú, Faro-Miguez N, Callejas-Rubio JL, Ceballos-Torres Á, et al. Anakinra after treatment with corticosteroids alone or with tocilizumab in patients with severe COVID-19 pneumonia and moderate hyperinflammation. A retrospective cohort study. *Internal and emergency medicine*. 2021;16(4):843-52.
  35. Aomar-Millán IF, Salvatierra J, Torres-Parejo Ú, Nuñez-Nuñez M, Hernández-Quero J, Anguita-Santos F. Glucocorticoids alone versus tocilizumab alone or glucocorticoids plus tocilizumab in patients with severe SARS-CoV-2 pneumonia and mild inflammation. *Medicina Clínica (English Edition)*. 2021.
  36. Arshad S, Kilgore P, Chaudhry ZS, Jacobsen G, Wang DD, Huitsing K, et al. Treatment with hydroxychloroquine, azithromycin, and combination in patients hospitalized with COVID-19. *International journal of infectious diseases*. 2020;97:396-403.
  37. Arslan Y, Yilmaz G, Dogan D, Hasirci M, Cetindogan H, Ocal N, et al. The effectiveness of early anticoagulant treatment in Covid-19 patients. *Phlebology*. 2021;36(5):384-91.
  38. Avendano-Sola C, Ramos-Martinez A, Munez-Rubio E, Ruiz-Antoran B, de Molina RM, Torres F, et al. Convalescent plasma for COVID-19: a multicenter, randomized clinical trial. *MedRxiv*. 2020.
  39. Awasthi S, Wagner T, Venkatakrishnan A, Puranik A, Hurchik M, Agarwal V, et al. Plasma IL-6 levels following corticosteroid therapy as an indicator of ICU length of stay in critically ill COVID-19 patients. *Cell death discovery*. 2021;7(1):1-15.
  40. Azmy V, Kaman K, Tang D, Zhao H, Cruz CD, Topal JE, et al. Cytokine Profiles Before and After Immune Modulation in Hospitalized Patients with COVID-19. *Journal of clinical immunology*. 2021;41(4):738-47.

**Comparative-effectiveness research of COVID-19 treatment: A rapid scoping review**

41. Babalola OE, Bode CO, Ajayi AA, Alakaloko FM, Akase IE, Otrofanowei E, et al. Ivermectin shows clinical benefits in mild to moderate Covid19 disease: A randomised controlled double blind dose response study in Lagos. *medRxiv*. 2021.
42. Baghaei P, Dastan F, Marjani M, Moniri A, Abtahian Z, Ghadimi S, et al. Combination therapy of IFN $\beta$ 1 with lopinavir–ritonavir, increases oxygenation, survival and discharging of sever COVID-19 infected inpatients. *International Immunopharmacology*. 2021;92:107329.
43. Bahl A, Johnson S, Chen N-W. Timing of corticosteroids impacts mortality in hospitalized COVID-19 patients. *Internal and emergency medicine*. 2021:1-11.
44. Bajpai M, Maheshwari A, Chabra K, Kale P, Gupta A, Gupta E, et al. Efficacy of convalescent plasma therapy compared to fresh frozen plasma in severely ill COVID-19 patients: A pilot randomized controlled trial. *medRxiv*. 2020.
45. Balcells ME, Rojas L, Le Corre N, Martínez-Valdebenito C, Ceballos ME, Ferrés M, et al. Early anti-SARS-CoV-2 convalescent plasma in patients admitted for COVID-19: a randomized phase II clinical trial. *medRxiv*. 2020.
46. Balcells ME, Rojas L, Le Corre N, Martínez-Valdebenito C, Ceballos ME, Ferrés M, et al. Early versus deferred anti-SARS-CoV-2 convalescent plasma in patients admitted for COVID-19: A randomized phase II clinical trial. *PLoS medicine*. 2021;18(3):e1003415.
47. Balkhair A, Al-Zakwani I, Al Busaidi M, Al-Khirbash A, Al Mubaihsi S, BaTaher H, et al. Anakinra in hospitalized patients with severe COVID-19 pneumonia requiring oxygen therapy: results of a prospective, open-label, interventional study. *International Journal of Infectious Diseases*. 2021;103:288-96.
48. Bandopadhyay P, D’Rozario R, Lahiri A, Sarif J, Ray Y, Paul SR, et al. Nature and Dimensions of Systemic Hyperinflammation and its Attenuation by Convalescent Plasma in Severe COVID-19. *The Journal of infectious diseases*. 2021;224(4):565-74.
49. Bani-Sadr F, Hentzien M, Pascard M, N’Guyen Y, Servettaz A, Andreoletti L, et al. Corticosteroid therapy for patients with COVID-19 pneumonia: a before–after study. *International Journal of Antimicrobial Agents*. 2020;56(2):106077.
50. Batirel A, Demirhan R, Eser N, Körlü E, Tezcan ME. Pulse steroid treatment for hospitalized adults with COVID-19. *Turkish journal of medical sciences*. 2021;51(5):2248-55.
51. Beiel J, Tomashek K, Dodd L, Mehta A, Zingman B, Kalil A, et al. Remdesivir for the Treatment of COVID-19—Final Report. *N Engl J Med*. 2020;383:1813-26.
52. Bernaola N, Mena R, Bernaola A, Carballo C, Lara A, Bielza C, et al. Observational study of the efficiency of treatments in patients hospitalized with Covid-19 in Madrid. *medRxiv*. 2020.
53. Bernardini A, Ciconte G, Negro G, Rondine R, Mecarocci V, Viva T, et al. Assessing QT interval in COVID-19 patients: safety of hydroxychloroquine-azithromycin combination regimen. *International Journal of Cardiology*. 2021;324:242-8.
54. Bhandari S, Rankawat G, Singh A. Tocilizumab: An Effective Therapy for Severely and Critically Ill COVID-19 Patients. *Indian Journal of Critical Care Medicine: Peer-reviewed, Official Publication of Indian Society of Critical Care Medicine*. 2021;25(3):260.

**Comparative-effectiveness research of COVID-19 treatment: A rapid scoping review**

55. Bian H, Zheng Z-H, Wei D, Zhang Z, Kang W-Z, Hao C-Q, et al. Meplazumab treats COVID-19 pneumonia: an open-labelled, concurrent controlled add-on clinical trial. *MedRxiv*. 2020.
56. Bihariesingh R, Bansie R, Froberg J, Ramdhani N, Mangroo R, Bustamente D, et al. Mortality reduction in ICU-admitted COVID-19 patients in Suriname after treatment with convalescent plasma acquired via gravity filtration. *medRxiv*. 2021.
57. Billett HH, Reyes-Gil M, Szymanski J, Ikemura K, Stahl LR, Lo Y, et al. Anticoagulation in COVID-19: effect of enoxaparin, heparin, and apixaban on mortality. *Thrombosis and haemostasis*. 2020;120(12):1691-9.
58. Bodro M, Cofan F, Ríos J, Herrera S, Linares L, Marcos MA, et al. Use of Anti-Cytokine Therapy in Kidney Transplant Recipients with COVID-19. *Journal of clinical medicine*. 2021;10(8):1551.
59. Bukhari SKHS, Asghar A, Perveen N, Hayat A, Mangat SA, Butt KR, et al. Efficacy of Ivermectin in COVID-19 Patients with Mild to Moderate Disease. *medRxiv*. 2021.
60. Burdick H, Lam C, Mataraso S, Siefkas A, Braden G, Dellinger RP, et al. Is Machine Learning a Better Way to Identify COVID-19 Patients Who Might Benefit from Hydroxychloroquine Treatment?—The IDENTIFY Trial. *Journal of Clinical Medicine*. 2020;9(12):3834.
61. Butler CC, Dorward J, Yu L-M, Gbinigie O, Hayward G, Saville BR, et al. Azithromycin for community treatment of suspected COVID-19 in people at increased risk of an adverse clinical course in the UK (PRINCIPLE): a randomised, controlled, open-label, adaptive platform trial. *The Lancet*. 2021;397(10279):1063-74.
62. Byttebier G, Belmans L, Alexander M, Saxberg BE, De Spiegeleer B, De Spiegeleer A, et al. Hospital mortality in COVID-19 patients in Belgium treated with statins, ACE inhibitors and/or ARBs. *Human Vaccines & Immunotherapeutics*. 2021:1-10.
63. Cadegiani FA, McCoy J, Wambier CG, Goren A. 5-Alpha-Reductase Inhibitors Reduce Remission Time of COVID-19: Results From a Randomized Double Blind Placebo Controlled Interventional Trial in 130 SARS-CoV-2 Positive Men. *medRxiv*. 2020.
64. Cadegiani FA, McCoy J, Wambier CG, Vaño-Galván S, Shapiro J, Tosti A, et al. Proxalutamide significantly accelerates viral clearance and reduces time to clinical remission in patients with mild to moderate COVID-19: Results from a randomized, double-blinded, placebo-controlled trial. *Cureus*. 2021;13(2).
65. Caracciolo M, Correale P, Mangano C, Foti G, Falcone C, Macheda S, et al. Efficacy and Effect of Inhaled Adenosine Treatment in Hospitalized COVID-19 Patients. *Frontiers in immunology*. 2021;12:734.
66. Carallo C, Pugliese F, Vettorato E, Tripolino C, Delle Donne L, Guarrera G, et al. Higher heparin dosages reduce thromboembolic complications in patients with COVID-19 pneumonia. *Journal of Investigative Medicine*. 2021;69(4):884-7.
67. Cardillo G, Viggiano GV, Russo V, Mangiacapra S, Cavalli A, Castaldo G, et al. Antithrombotic and Anti-Inflammatory Effects of Fondaparinux and Enoxaparin in Hospitalized COVID-19 Patients: The FONDENOXAVID Study. *Journal of blood medicine*. 2021;12:69.

**Comparative-effectiveness research of COVID-19 treatment: A rapid scoping review**

68. Carvalho V, Turon R, Goncalves B, Ceotto V, Kurtz P, Righy C. Effects of tocilizumab in critically ill patients with COVID-19: a quasi-experimental study. medRxiv. 2020.
69. Cegolon L, Einollahi B, Imanizadeh S, Rezapour M, Javanbakht M, Nikpouraghdam M, et al. On whether therapeutic plasma exchange is an effective cure for severe/critical COVID-19 pneumonia. medRxiv. 2021.
70. Chahla RE, Ruiz LM, Mena T, Brepe Y, Terranova P, Ortega ES, et al. IVERMECTIN REPROPOSING FOR COVID-19 TREATMENT OUTPATIENTS IN MILD STAGE IN PRIMARY HEALTH CARE CENTERS. medRxiv. 2021.
71. Chang D, Saleh M, Gabriels J, Ismail H, Goldner B, Willner J, et al. Inpatient use of ambulatory telemetry monitors for COVID-19 patients treated with hydroxychloroquine and/or azithromycin. *Journal of the American College of Cardiology*. 2020;75(23):2992-3.
72. Chen C, Huang J, Cheng Z, Wu J, Chen S, Zhang Y, et al. Favipiravir versus arbidol for COVID-19: a randomized clinical trial. MedRxiv. 2020.
73. Chen C-P, Lin Y-C, Chen T-C, Tseng T-Y, Wong H-L, Kuo C-Y, et al. A multicenter, randomized, open-label, controlled trial to evaluate the efficacy and tolerability of hydroxychloroquine and a retrospective study in adult patients with mild to moderate coronavirus disease 2019 (COVID-19). *PloS one*. 2020;15(12):e0242763.
74. Chen J, Liu D, Liu L, Liu P, Xu Q, Xia L, et al. A pilot study of hydroxychloroquine in treatment of patients with moderate COVID-19. *Journal of Zhejiang University (Medical Science)*. 2020;49(2):215-9.
75. Chen J, Xia L, Liu L, Xu Q, Ling Y, Huang D, et al., editors. Antiviral activity and safety of darunavir/cobicistat for the treatment of COVID-19. *Open forum infectious diseases*; 2020: Oxford University Press US.
76. Chen L, Zhang Z-y, Fu J-g, Feng Z-p, Zhang S-Z, Han Q-Y, et al. Efficacy and safety of chloroquine or hydroxychloroquine in moderate type of COVID-19: a prospective open-label randomized controlled study. MedRxiv. 2020.
77. Chen P, Nirula A, Heller B, Gottlieb RL, Boscia J, Morris J, et al. SARS-CoV-2 neutralizing antibody LY-CoV555 in outpatients with Covid-19. *New England Journal of Medicine*. 2021;384(3):229-37.
78. Chen Q, Song Y, Wang L, Zhang Y, Han L, Liu J, et al. Corticosteroids treatment in severe patients with COVID-19: a propensity score matching study. *Expert review of respiratory medicine*. 2021;15(4):543-52.
79. Chen W, Yao M, Fang Z, Lv X, Deng M, Wu Z. A study on clinical effect of Arbidol combined with adjuvant therapy on COVID- 19. *Journal of medical virology*. 2020;92(11):2702-8.
80. Chen Z, Hu J, Zhang Z, Jiang S, Han S, Yan D, et al. Efficacy of hydroxychloroquine in patients with COVID-19: results of a randomized clinical trial. medrxiv. 2020.
81. Chow JH, Khanna AK, Kethireddy S, Yamane D, Levine A, Jackson AM, et al. Aspirin use is associated with decreased mechanical ventilation, intensive care unit admission, and in-hospital mortality in hospitalized patients with coronavirus disease 2019. *Anesthesia & Analgesia*. 2021;132(4):930-41.



**Comparative-effectiveness research of COVID-19 treatment: A rapid scoping review**

82. Chroboczek T, Lacoste M, Wackenheim C, Challan-Belval T, Amar B, Boisson T, et al. Beneficial effect of corticosteroids in severe COVID-19 pneumonia: a propensity score matching analysis. *MedRxiv*. 2020.
83. Consortium WST. Repurposed antiviral drugs for COVID-19—interim WHO SOLIDARITY trial results. *New England journal of medicine*. 2021;384(6):497-511.
84. Consortium WST. Repurposed antiviral drugs for COVID-19—interim WHO SOLIDARITY trial results. *New England journal of medicine*. 2021;384(6):497-511.
85. Corral L, Bahamonde A, delas Revillas FA, Gomez-Barquero J, Abadia-Otero J, Garcia-Ibarbia C, et al. GLUCOCOVID: A controlled trial of methylprednisolone in adults hospitalized with COVID-19 pneumonia. *MedRxiv*. 2020.
86. Courcelle R, Gaudry S, Serck N, Blonz G, Lascarrou J-B, Grimaldi D. Neuromuscular blocking agents (NMBA) for COVID-19 acute respiratory distress syndrome: a multicenter observational study. *Critical Care*. 2020;24(1):1-4.
87. Cremer PC, Abbate A, Hudock K, McWilliams C, Mehta J, Chang SY, et al. Mavrilimumab in patients with severe COVID-19 pneumonia and systemic hyperinflammation (MASH-COVID): an investigator initiated, multicentre, double-blind, randomised, placebo-controlled trial. *The Lancet Rheumatology*. 2021.
88. Cruz LR, Baladrón I, Rittoles A, Díaz PA, Valenzuela C, Santana R, et al. Treatment with an Anti-CK2 Synthetic Peptide Improves Clinical Response in Covid-19 Patients with Pneumonia. A Randomized and Controlled Clinical Trial. *ACS pharmacology & translational science*. 2020;4(1):206-12.
89. Dabbous HM, El-Sayed MH, El Assal G, Elghazaly H, Ebeid FF, Sherief AF, et al. Safety and efficacy of favipiravir versus hydroxychloroquine in management of COVID-19: A randomised controlled trial. *Scientific reports*. 2021;11(1):1-7.
90. de la Calle C, López-Medrano F, Pablos JL, Lora-Tamayo J, Maestro-de la Calle G, Sánchez-Fernández M, et al. Effectiveness of anakinra for tocilizumab-refractory severe COVID-19: A single-centre retrospective comparative study. *International Journal of Infectious Diseases*. 2021;105:319-25.
91. De Luca G, Cavalli G, Campochiaro C, Della Torre E, Angelillo P, Tomelleri A, et al. CO0001 MAVRILIMUMAB IMPROVES OUTCOMES IN SEVERE COVID-19 PNEUMONIA AND SYSTEMIC HYPER-INFLAMMATION. *BMJ Publishing Group Ltd*; 2020.
92. De Rossi N, Scarpazza C, Filippini C, Cordioli C, Rasia S, Mancinelli CR, et al. Early use of low dose tocilizumab in patients with COVID-19: A retrospective cohort study with a complete follow-up. *EClinicalMedicine*. 2020;25:100459.
93. Deftereos SG, Giannopoulos G, Vrachatis DA, Siasos GD, Giotaki SG, Gargalianos P, et al. Effect of colchicine vs standard care on cardiac and inflammatory biomarkers and clinical outcomes in patients hospitalized with coronavirus disease 2019: the GRECCO-19 randomized clinical trial. *JAMA network open*. 2020;3(6):e2013136-e.
94. Della-Torre E, Lanzillotta M, Campochiaro C, Cavalli G, De Luca G, Tomelleri A, et al. Respiratory Impairment Predicts Response to IL-1 and IL-6 Blockade in COVID-19 Patients With Severe Pneumonia and Hyper-Inflammation. *Frontiers in Immunology*. 2021;12:1564.
95. Di Castelnuovo A, Costanzo S, Antinori A, Berselli N, Blandi L, Bruno R, et al. Use of hydroxychloroquine in hospitalised COVID-19 patients is associated with reduced

**Comparative-effectiveness research of COVID-19 treatment: A rapid scoping review**

- mortality: Findings from the observational multicentre Italian CORIST study. *European journal of internal medicine*. 2020;82:38-47.
96. Diaz RM, García MAA, Muñoz FJT, Perez LES, Gonzalez MM, Bermejo JAM, et al. Does timing matter on tocilizumab administration? Clinical, analytical and radiological outcomes in COVID-19. *European Journal of Hospital Pharmacy*. 2021.
  97. Diaz RM, García MAA, Muñoz FJT, Perez LES, Gonzalez MM, Bermejo JAM, et al. Does timing matter on tocilizumab administration? Clinical, analytical and radiological outcomes in COVID-19. *European Journal of Hospital Pharmacy*. 2021.
  98. Duarte M, Pelorosso F, Nicolosi LN, Salgado MV, Vetulli H, Aquieri A, et al. Telmisartan for treatment of Covid-19 patients: An open multicenter randomized clinical trial. *EclinicalMedicine*. 2021;37:100962.
  99. Dubee V, Roy P-M, Vielle B, Parot-Schinkel E, Blanchet O, Darsonval A, et al. A placebo-controlled double blind trial of hydroxychloroquine in mild-to-moderate COVID-19. *medRxiv*. 2020.
  100. Dupuis C, de Montmollin E, Buetti N, Goldgran-Toledano D, Reignier J, Schwebel C, et al. Impact of early corticosteroids on 60-day mortality in critically ill patients with COVID-19: A multicenter cohort study of the OUTCOMEREA network. *PloS one*. 2021;16(8):e0255644.
  101. Eftekhar SP, Kazemi S, Barary M, Javanian M, Ebrahimpour S, Ziaei N. Hydroxychloroquine and azithromycin: As a double edge sword for COVID-19? *medRxiv*. 2021.
  102. Faico-Filho KS, Conte DD, Luna LKS, Carvalho JMA, Perosa AHS, Bellei N. Effect of hydroxychloroquine on SARS-CoV-2 viral load in patients with COVID-19. *MedRxiv*. 2020.
  103. Fang X, Mei Q, Yang T, Li L, Wang Y, Tong F, et al. Low-dose corticosteroid therapy does not delay viral clearance in patients with COVID-19. *The Journal of infection*. 2020;81(1):147.
  104. Feld JJ, Kandel C, Biondi MJ, Kozak RA, Zahoor MA, Lemieux C, et al. Peginterferon lambda for the treatment of outpatients with COVID-19: a phase 2, placebo-controlled randomised trial. *The Lancet Respiratory Medicine*. 2021;9(5):498-510.
  105. Ferguson J, Volk S, Vondracek T, Flanigan J, Chernaik A. Empiric therapeutic anticoagulation and mortality in critically ill patients with respiratory failure from SARS- CoV- 2: a retrospective cohort study. *The Journal of Clinical Pharmacology*. 2020;60(11):1411-5.
  106. Fernandez-Caballero R, Arroyo VC, Herranz-Muñoz C, Henares-Lopez A. 4CPS-315 Evaluation of the effectiveness of early administration of tocilizumab in patients with COVID-19. *British Medical Journal Publishing Group*; 2021.
  107. Fernandez-Cruz A, Ruiz-Antorán B, Munoz-Gomez A, Sancho-Lopez A, Mills-Sanchez P, Centeno-Soto GA, et al. Impact of glucocorticoid treatment in SARS-COV-2 infection mortality: a retrospective controlled cohort study. *medRxiv*. 2020.
  108. Firozabad AR, Meybodi ZA, Mousavinasab SR, Sahebnaasagh A, Jelodar MG, Karimzadeh I, et al. Efficacy and safety of Levamisole treatment in clinical presentations of non-hospitalized patients with COVID-19: a double-blind, randomized, controlled trial. *BMC Infectious Diseases*. 2021;21(1):1-8.

**Comparative-effectiveness research of COVID-19 treatment: A rapid scoping review**

109. Fisher MJ, Raymundo LAM, Monteforte M, Taub EM, Go R. Tocilizumab in the treatment of critical COVID-19 pneumonia: a retrospective cohort study of mechanically ventilated patients. *International Journal of Infectious Diseases*. 2021;103:536-9.
110. Flisiak R, Jaroszewicz J, Rogalska M, Łapiński T, Berkan-Kawińska A, Bolewska B, et al. Tocilizumab improves the prognosis of COVID-19 in patients with high IL-6. *Journal of Clinical Medicine*. 2021;10(8):1583.
111. Flisiak R, Zarebska-Michaluk D, Berkan-Kawinska A, Tudrujek-Zdunek M, Rogalska M, Piekarska A, et al. Remdesivir-based therapy improved recovery of patients with COVID-19 in the SARSTer multicentre, real-world study. *medRxiv*. 2020.
112. Frago-so-Saavedra S, Núñez I, Audelo-Cruz BM, Arias-Martínez S, Manzur-Sandoval D, Quintero-Villegas A, et al. Pyridostigmine in adults with severe SARS-CoV-2 infection: the PISCO trial. *medRxiv*. 2021.
113. Franchini M, Glingani C, Morandi M, Corghi G, Cerzosimo S, Beduzzi G, et al. Safety and efficacy of convalescent plasma in elderly COVID-19 patients: The RESCUE trial. *Mayo Clinic Proceedings: Innovations, Quality & Outcomes*. 2021;5(2):403-12.
114. Franzetti M, Forastieri A, Borsa N, Pandolfo A, Molteni C, Borghesi L, et al. IL-1 Receptor Antagonist Anakinra in the Treatment of COVID-19 Acute Respiratory Distress Syndrome: A Retrospective, Observational Study. *The Journal of Immunology*. 2021;206(7):1569-75.
115. Freedberg DE, Conigliaro J, Wang TC, Tracey KJ, Callahan MV, Abrams JA, et al. Famotidine use is associated with improved clinical outcomes in hospitalized COVID-19 patients: a propensity score matched retrospective cohort study. *Gastroenterology*. 2020;159(3):1129-31. e3.
116. Fu W, Liu Y, Liu L, Hu H, Cheng X, Liu P, et al. An open-label, randomized trial of the combination of IFN- $\kappa$  plus TFF2 with standard care in the treatment of patients with moderate COVID-19. *EClinicalMedicine*. 2020;27:100547.
117. Fu W, Liu Y, Xia L, Li M, Song Z, Hu H, et al. A clinical pilot study on the safety and efficacy of aerosol inhalation treatment of IFN- $\kappa$  plus TFF2 in patients with moderate COVID-19. *EClinicalMedicine*. 2020;25:100478.
118. Furtado RH, Berwanger O, Fonseca HA, Corrêa TD, Ferraz LR, Lapa MG, et al. Azithromycin in addition to standard of care versus standard of care alone in the treatment of patients admitted to the hospital with severe COVID-19 in Brazil (COALITION II): a randomised clinical trial. *The Lancet*. 2020;396(10256):959-67.
119. Fusina F, Albani F, Granato E, Meloni A, Rozzini R, Sabatini T, et al. Effect of corticosteroids on mortality in hospitalized COVID-19 patients not receiving invasive mechanical ventilation. *Clinical Pharmacology & Therapeutics*. 2021.
120. Gagliardini R, Cozzi-Lepri A, Mariano A, Taglietti F, Vergori A, Abbedaim A, et al. No Efficacy of the Combination of Lopinavir/Ritonavir Plus Hydroxychloroquine Versus Standard of Care in Patients Hospitalized With COVID-19: A Non-Randomized Comparison. *Frontiers in Pharmacology*. 2021;12:520.
121. Gallay L, Tran V-T, Perrodeau E, Vignier N, Mahevas M, Bisio F, et al. Fourteen-day survival among older adults with severe infection with severe acute respiratory

**Comparative-effectiveness research of COVID-19 treatment: A rapid scoping review**

- syndrome coronavirus 2 treated with corticosteroid: a cohort study. *Clinical Microbiology and Infection*. 2021.
122. Gallay L, Tran V-T, Perrodeau E, Vignier N, Mahevas M, Bisio F, et al. Corticosteroids are associated with increased survival in elderly presenting severe SARS-Cov2 infection. *medRxiv*. 2020.
  123. Galvez- Romero JL, Palmeros- Rojas O, Real- Ramírez FA, Sánchez- Romero S, Tome- Maxil R, Ramírez- Sandoval MP, et al. Cyclosporine A plus low- dose steroid treatment in COVID- 19 improves clinical outcomes in patients with moderate to severe disease: a pilot study. *Journal of internal medicine*. 2021;289(6):906-20.
  124. Gao D, Xu M, Wang G, Lv J, Ma X, Guo Y, et al. The efficiency and safety of high-dose vitamin C in patients with COVID-19: A retrospective cohort study. *Aging (Albany NY)*. 2021;13(5):7020.
  125. Gao G, Wang A, Wang S, Qian F, Chen M, Yu F, et al. Brief report: retrospective evaluation on the efficacy of lopinavir/ritonavir and chloroquine to treat nonsevere COVID-19 patients. *Journal of acquired immune deficiency syndromes (1999)*. 2020;85(2):239.
  126. Gao X, Ma C, Ma Y, Wang X, Wei J, Feng T, et al. Clinical efficacy and safety of different antiviral regimens in patients with coronavirus disease 2019. *Zhonghua Wei Zhong Bing Ji Jiu Yi Xue*. 2020:1423-7.
  127. Garibaldi BT, Wang K, Robinson ML, Zeger SL, Bandeen-Roche K, Wang M-C, et al. Comparison of Time to Clinical Improvement With vs Without Remdesivir Treatment in Hospitalized Patients With COVID-19. *JAMA network open*. 2021;4(3):e213071-e.
  128. Geleris J, Sun Y, Platt J, Zucker J, Baldwin M, Hripcsak G, et al. Observational study of hydroxychloroquine in hospitalized patients with Covid-19. *New England Journal of Medicine*. 2020;382(25):2411-8.
  129. Generali D, Bosio G, Malberti F, Cuzzoli A, Testa S, Romanini L, et al. Canakinumab as treatment for COVID-19-related pneumonia: a prospective case-control study. *International Journal of Infectious Diseases*. 2021;104:433-40.
  130. Geriak M, Haddad F, Kullar R, Greenwood KL, Habib M, Habib C, et al. Randomized Prospective Open Label Study Shows No Impact on Clinical Outcome of Adding Losartan to Hospitalized COVID-19 Patients with Mild Hypoxemia. *Infectious diseases and therapy*. 2021:1-8.
  131. Ghandehari S, Matusov Y, Pepkowitz S, Stein D, Kaderi T, Narayanan D, et al. Progesterone in Addition to Standard of Care vs Standard of Care Alone in the Treatment of Men Hospitalized With Moderate to Severe Covid-19: A Randomized, Controlled Pilot Trial. *Chest*. 2021.
  132. Gharebaghi N, Nejadrahim R, Mousavi SJ, Sadat-Ebrahimi S-R, Hajizadeh R. The use of intravenous immunoglobulin gamma for the treatment of severe coronavirus disease 2019: a randomized placebo-controlled double-blind clinical trial. *BMC infectious diseases*. 2020;20(1):1-8.
  133. Giacomelli A, Pagani G, Ridolfo AL, Oreni L, Conti F, Pezzati L, et al. Early administration of lopinavir/ritonavir plus hydroxychloroquine does not alter the clinical course of SARS- CoV- 2 infection: a retrospective cohort study. *Journal of Medical Virology*. 2021;93(3):1421-7.

**Comparative-effectiveness research of COVID-19 treatment: A rapid scoping review**

134. Gokhale Y, Mehta R, Kulkarni U, Karnik N, Gokhale S, Sundar U, et al. Tocilizumab improves survival in severe COVID-19 pneumonia with persistent hypoxia: a retrospective cohort study with follow-up from Mumbai, India. *BMC Infectious Diseases*. 2021;21(1):1-10.
135. Goldberg E, Zvi HB, Sheena L, Sofer S, Krause I, Sklan EH, et al. A real-life setting evaluation of the effect of remdesivir on viral load in COVID-19 patients admitted to a large tertiary centre in Israel. *Clinical Microbiology and Infection*. 2021;27(6):917.e1-. e4.
136. Goldman JD, Lye DC, Hui DS, Marks KM, Bruno R, Montejano R, et al. Remdesivir for 5 or 10 days in patients with severe Covid-19. *New England Journal of Medicine*. 2020;383(19):1827-37.
137. Gong W-J, Zhou T, Wu S-L, Ye J-L, Xu J-Q, Zeng F, et al. A retrospective analysis of clinical efficacy of ribavirin in adults hospitalized with severe COVID-19. *Journal of Infection and Chemotherapy*. 2021;27(6):876-81.
138. Gong Y, Guan L, Jin Z, Chen S, Xiang G, Gao B. Effects of methylprednisolone use on viral genomic nucleic acid negative conversion and CT imaging lesion absorption in COVID- 19 patients under 50 years old. *Journal of medical virology*. 2020;92(11):2551-5.
139. Gonzalez SE, Regairaz L, Salazar M, Ferrando N, Gonzalez V, Ramos PC, et al. Timing of Convalescent plasma administration and 28-day mortality for COVID-19 pneumonia. *medRxiv*. 2021.
140. Gonzalez-Ochoa AJ, Raffetto JD, Hernández AG, Zavala N, Gutiérrez O, Vargas A, et al. Sulodexide in the treatment of patients with early stages of COVID-19: a randomized controlled trial. *Thrombosis and haemostasis*. 2021.
141. Gonzalez-Ochoa AJ, Raffetto JD, Hernández AG, Zavala N, Gutiérrez O, Vargas A, et al. Sulodexide in the treatment of patients with early stages of COVID-19: a randomized controlled trial. *Thrombosis and haemostasis*. 2021.
142. Gordon AC, Mouncey PR, Al-Beidh F, Rowan KM, Nichol AD, Arabi YM, et al. Interleukin-6 receptor antagonists in critically ill patients with Covid-19. *The New England journal of medicine*. 2021.
143. Gorenstein SA, Castellano ML, Slone ES, Gillette B, Liu H, Alsamarraie C, et al. Hyperbaric oxygen therapy for COVID-19 patients with respiratory distress: treated cases versus propensity-matched controls. *Undersea Hyperb Med*. 2020:405-13.
144. Gottlieb RL, Nirula A, Chen P, Boscia J, Heller B, Morris J, et al. Effect of bamlanivimab as monotherapy or in combination with etesevimab on viral load in patients with mild to moderate COVID-19: a randomized clinical trial. *Jama*. 2021;325(7):632-44.
145. Grimaldi D, Aissaoui N, Blonz G, Carbutti G, Courcelle R, Gaudry S, et al. Characteristics and outcomes of acute respiratory distress syndrome related to COVID-19 in Belgian and French intensive care units according to antiviral strategies: the COVADIS multicentre observational study. *Annals of intensive care*. 2020;10(1):1-11.
146. Group A-TL-CS. A neutralizing monoclonal antibody for hospitalized patients with Covid-19. *New England Journal of Medicine*. 2021;384(10):905-14.
147. Group RC. Effect of hydroxychloroquine in hospitalized patients with Covid-19. *New England Journal of Medicine*. 2020;383(21):2030-40.

**Comparative-effectiveness research of COVID-19 treatment: A rapid scoping review**

148. Group RC. Tocilizumab in patients admitted to hospital with COVID-19 (RECOVERY): a randomised, controlled, open-label, platform trial. *Lancet* (London, England). 2021;397(10285):1637.
149. Group TRC. Dexamethasone in hospitalized patients with Covid-19—preliminary report. *The New England journal of medicine*. 2020.
150. Guaraldi G, Meschiari M, Cozzi-Lepri A, Milic J, Tonelli R, Menozzi M, et al. Tocilizumab in patients with severe COVID-19: a retrospective cohort study. *The Lancet Rheumatology*. 2020;2(8):e474-e84.
151. Gunay S, Caliskan S, Sigirli D, Sahin E. Ventricular repolarization indexes in patients treated with hydroxychloroquine-azithromycin combination for COVID-19. *Bratislavske Lekarske Listy*. 2020;121(11):817-21.
152. Guner R, Hasanoglu I, Kayaaslan B, Aypak A, Akinci E, Bodur H, et al. Comparing ICU admission rates of mild/moderate COVID-19 patients treated with hydroxychloroquine, favipiravir, and hydroxychloroquine plus favipiravir. *Journal of Infection and Public Health*. 2021;14(3):365-70.
153. Gunst JD, Staerke NB, Pahus MH, Kristensen LH, Bodilsen J, Lohse N, et al. Efficacy of the TMPRSS2 inhibitor camostat mesilate in patients hospitalized with Covid-19—a double-blind randomized controlled trial. *EClinicalMedicine*. 2021:100849.
154. Gupta S, Wang W, Hayek SS, Chan L, Mathews KS, Melamed ML, et al. Association between early treatment with tocilizumab and mortality among critically ill patients with COVID-19. *JAMA internal medicine*. 2021;181(1):41-51.
155. Häberle H, Magunia H, Lang P, Gloeckner H, Körner A, Koeppen M, et al. Mesenchymal stem cell therapy for severe COVID-19 ARDS. *Journal of Intensive Care Medicine*. 2021;36(6):681-8.
156. Hacibekiroğlu T, Kalpakci Y, Genç AC, Hacibekiroğlu İ, Sunu C, Saricaoğlu A, et al. Efficacy of convalescent plasma according to blood groups in COVID-19 patients. *Turkish Journal of Medical Sciences*. 2021;51(1):45-8.
157. Halaby R, Cuker A, Yui J, Matthews A, Ishaaya E, Traxler E, et al. Bleeding risk by intensity of anticoagulation in critically ill patients with COVID- 19: A retrospective cohort study. *Journal of Thrombosis and Haemostasis*. 2021.
158. Hanif A, Khan S, Mantri N, Hanif S, Saleh M, Alla Y, et al. Thrombotic complications and anticoagulation in COVID-19 pneumonia: a New York City hospital experience. *Annals of hematology*. 2020;99(10):2323-8.
159. Hao S-r, Yan R, Zhang S-y, Lian J-s, Cai H, Zhang X-l, et al. Interferon- $\alpha$ 2b spray inhalation did not shorten virus shedding time of SARS-CoV-2 in hospitalized patients: a preliminary matched case-control study. *Journal Of Zhejiang University-Science B*. 2020;21(8):628-36.
160. Hasan MJ, Rabbani R, Anam AM, Huq SMR. Additional baricitinib loading dose improves clinical outcome in COVID-19. *Open Medicine*. 2021;16(1):041-6.
161. Hasan MJ, Rabbani R, Anam AM, Huq SMR, Polash MMI, Nessa SST, et al. Impact of high dose of baricitinib in severe COVID-19 pneumonia: a prospective cohort study in Bangladesh. *BMC Infectious Diseases*. 2021;21(1):1-9.
162. Hashim HA, Maulood MF, Rasheed AM, Fatak DF, Kabah KK, Abdulmir AS. Controlled randomized clinical trial on using Ivermectin with Doxycycline for treating COVID-19 patients in Baghdad, Iraq. *MedRxiv*. 2020.

**Comparative-effectiveness research of COVID-19 treatment: A rapid scoping review**

163. Hatzl S, Posch F, Sareban N, Stradner M, Roszkopf K, Reisinger AC, et al. Convalescent plasma therapy and mortality in COVID-19 patients admitted to the ICU: a prospective observational study. *Annals of intensive care*. 2021;11(1):1-11.
164. Hayek ME, Mansour M, Ndetan H, Burkes Q, Corkern R, Dulli A, et al. Anti-Inflammatory treatment of COVID-19 pneumonia with tofacitinib alone or in combination with dexamethasone is safe and possibly superior to dexamethasone as a single agent in a predominantly African American cohort. *Mayo Clinic Proceedings: Innovations, Quality & Outcomes*. 2021.
165. Hazlett C, Wulf DA, Pasaniuc B, Arah OA, Erlandson KM, Montague BT. Credible learning of hydroxychloroquine and dexamethasone effects on COVID-19 mortality outside of randomized trials. *medRxiv*. 2020.
166. Helms J, Severac F, Merdji H, Schenck M, Clere-Jehl R, Baldacini M, et al. Higher anticoagulation targets and risk of thrombotic events in severe COVID-19 patients: bi-center cohort study. *Annals of Intensive Care*. 2021;11(1):1-8.
167. Hermine O, Mariette X, Tharaux P-L, Resche-Rigon M, Porcher R, Ravaud P, et al. Effect of tocilizumab vs usual care in adults hospitalized with COVID-19 and moderate or severe pneumonia: a randomized clinical trial. *JAMA internal medicine*. 2021;181(1):32-40.
168. Hernandez-Cardenas C, Thirion-Romero I, Rodríguez-Llamazares S, Rivera-Martinez NE, Meza-Meneses P, Remigio-Luna A, et al. Hydroxychloroquine for the treatment of severe respiratory infection by covid-19: a randomized controlled trial. *PloS one*. 2021;16(9):e0257238.
169. Herrero FS, Gimeno FP, García PO, Gómez CF, Mochón MDO, Deltoro MG. Methylprednisolone added to tocilizumab reduces mortality in SARS- CoV- 2 pneumonia: An observational study. *Journal of internal medicine*. 2020.
170. Hill JA, Menon MP, Dhanireddy S, Wurfel MM, Green M, Jain R, et al. Tocilizumab in hospitalized patients with COVID- 19: Clinical outcomes, inflammatory marker kinetics, and safety. *Journal of medical virology*. 2021;93(4):2270-80.
171. Hinks TS, Cureton L, Knight R, Wang A, Cane JL, Barber VS, et al. A randomised clinical trial of azithromycin versus standard care in ambulatory COVID-19—the ATOMIC2 trial. 2021.
172. Ho KS, Narasimhan B, Difabrizio L, Rogers L, Bose S, Li L, et al. Impact of corticosteroids in hospitalised COVID-19 patients. *BMJ open respiratory research*. 2021;8(1):e000766.
173. Hoertel N, Sánchez M, Vernet R, Beeker N, Neuraz A, Blanco C, et al. Association between hydroxyzine use and reduced mortality in patients hospitalized for coronavirus disease 2019: results from a multicenter observational study. *medRxiv*. 2020.
174. Hoertel N, Sánchez-Rico M, Gulbins E, Kornhuber J, Carpinteiro A, Abellán M, et al. Association between Psychotropic Medications Functionally Inhibiting Acid Sphingomyelinase and reduced risk of Intubation or Death among Individuals with Mental Disorder and Severe COVID-19: an Observational Study. *medRxiv*. 2021.
175. Hoertel N, Sánchez-Rico M, Gulbins E, Kornhuber J, Carpinteiro A, Lenze EJ, et al. Association between Functional Inhibitors of Acid Sphingomyelinase and Reduced Risk of Intubation or Death in Individuals Hospitalized for Severe COVID-19: results from an observational multicenter study. *medRxiv*. 2021.

**Comparative-effectiveness research of COVID-19 treatment: A rapid scoping review**

176. Hoertel N, Sánchez- Rico M, Vernet R, Beeker N, Neuraz A, Alvarado JM, et al. Dexamethasone use and mortality in hospitalized patients with coronavirus disease 2019: A multicentre retrospective observational study. *British journal of clinical pharmacology*. 2021.
177. Hoertel N, Sánchez-Rico M, Vernet R, Jannot A-S, Neuraz A, Blanco C, et al. Observational study of chlorpromazine in hospitalized patients with COVID-19. *Clinical drug investigation*. 2021;41(3):221-33.
178. Hoertel N, Sánchez-Rico M, Vernet R, Jannot A-S, Neuraz A, Blanco C, et al. Observational study of haloperidol in hospitalized patients with COVID-19. *PloS one*. 2021;16(2):e0247122.
179. Hong G, Patel M, Tusha J, Giri P, Al-Janabi L, Adusumilli RK, et al. Corticosteroid Treatment In Patients With Severe COVID-19 Pneumonia. *Chest*. 2020;158(4):A599.
180. Horby P, Campbell M, Spata E. Colchicine in patients admitted to hospital with COVID-19 (RECOVERY): a randomised, controlled, open-label, platform trial. *medRxiv*. 2021.05. 18.21257267.
181. Horby PW, Campbell M, Staplin N, Spata E, Emberson JR, Pessoa-Amorim G, et al. Tocilizumab in patients admitted to hospital with COVID-19 (RECOVERY): preliminary results of a randomised, controlled, open-label, platform trial. *Medrxiv*. 2021.
182. Horby PW, Estcourt L, Peto L, Emberson JR, Staplin N, Spata E, et al. Convalescent plasma in patients admitted to hospital with COVID-19 (RECOVERY): a randomised, controlled, open-label, platform trial. *medRxiv*. 2021.
183. Horby PW, Mafham M, Bell JL, Linsell L, Staplin N, Emberson J, et al. Lopinavir–ritonavir in patients admitted to hospital with COVID-19 (RECOVERY): a randomised, controlled, open-label, platform trial. *The Lancet*. 2020;396(10259):1345-52.
184. Horby PW, Roddick A, Spata E, Staplin N, Emberson JR, Pessoa-Amorim G, et al. Azithromycin in hospitalised patients with COVID-19 (RECOVERY): a randomised, controlled, open-label, platform trial. *medRxiv*. 2020.
185. Hraiech S, Bourenne J, Kuteifan K, Helms J, Carvelli J, Gannier M, et al. Lack of viral clearance by the combination of hydroxychloroquine and azithromycin or lopinavir and ritonavir in SARS-CoV-2-related acute respiratory distress syndrome. *Annals of intensive care*. 2020;10:1-3.
186. Hu K, Wang M, Zhao Y, Zhang Y, Wang T, Zheng Z, et al. A small-scale medication of leflunomide as a treatment of COVID-19 in an open-label blank-controlled clinical trial. *Virologica Sinica*. 2020;35(6):725-33.
187. Hu Y, Wang T, Hu Z, Wang X, Zhang Z, Li L, et al. Clinical efficacy of glucocorticoid on the treatment of patients with COVID-19 pneumonia: A single-center experience. *Biomedicine & Pharmacotherapy*. 2020;130:110529.
188. Huang C, Fei L, Li W, Xu W, Xie X, Li Q, et al. Efficacy evaluation of intravenous immunoglobulin in non-severe patients with COVID-19: a retrospective cohort study based on propensity score matching. *International Journal of Infectious Diseases*. 2021;105:525-31.
189. Huang CL, Fei L, Xu W, Li W, Xie XD, Li Q, et al. Efficacy Evaluation of Thymosin Alpha 1 in Non-severe Patients With COVID-19: A Retrospective Cohort Study Based on Propensity Score Matching. *Frontiers in Medicine*. 2021;8:436.



**Comparative-effectiveness research of COVID-19 treatment: A rapid scoping review**

190. Huang E, Isonaka S, Yang H, Salce E, Rosales E, Jordan SC. Tocilizumab treatment in critically ill patients with COVID-19: A retrospective observational study. *International Journal of Infectious Diseases*. 2021;105:245-51.
191. Huang HD, Jneid H, Aziz M, Ravi V, Sharma PS, Larsen T, et al. Safety and effectiveness of hydroxychloroquine and azithromycin combination therapy for treatment of hospitalized patients with COVID-19: a Propensity-Matched study. *Cardiology and therapy*. 2020;9(2):523-34.
192. Huang R, Zhu C, Wang J, Xue L, Li C, Yan X, et al. Corticosteroid therapy is associated with the delay of SARS-CoV-2 clearance in COVID-19 patients. *European journal of pharmacology*. 2020;889:173556.
193. Huang Y-Q, Tang S-Q, Xu X-L, Zeng Y-M, He X-Q, Li Y, et al. No statistically apparent difference in antiviral effectiveness observed among ribavirin plus interferon-alpha, lopinavir/ritonavir plus interferon-alpha, and ribavirin plus lopinavir/ritonavir plus interferon-alpha in patients with mild to moderate coronavirus disease 2019: results of a randomized, open-labeled prospective study. *Frontiers in pharmacology*. 2020;11:1071.
194. Huet T, Beaussier H, Voisin O, Jouveshomme S, Dauriat G, Lazareth I, et al. Anakinra for severe forms of COVID-19: a cohort study. *The Lancet Rheumatology*. 2020;2(7):e393-e400.
195. Hung IF-N, Lung K-C, Tso EY-K, Liu R, Chung TW-H, Chu M-Y, et al. Triple combination of interferon beta-1b, lopinavir-ritonavir, and ribavirin in the treatment of patients admitted to hospital with COVID-19: an open-label, randomised, phase 2 trial. *The Lancet*. 2020;395(10238):1695-704.
196. Husby A, Pottegaard A, Hviid AP. Inhaled corticosteroid use in COVID-19. *medRxiv*. 2020.
197. Iglesias-Julián E, López-Veloso M, de-la-Torre-Ferrera N, Barraza-Vengoechea JC, Delgado-López PD, Colazo-Burlato M, et al. High dose subcutaneous Anakinra to treat acute respiratory distress syndrome secondary to cytokine storm syndrome among severely ill COVID-19 patients. *Journal of Autoimmunity*. 2020;115:102537.
198. Ignatius EH, Wang K, Karaba A, Robinson M, Avery RK, Blair P, et al., editors. Tocilizumab for the treatment of COVID-19 among hospitalized patients: a matched retrospective cohort analysis. *Open Forum Infectious Diseases*; 2021: Oxford University Press US.
199. Ilgın BU, Koyuncu İMA, Kızıltunç E. Effect of triple antimicrobial therapy on electrocardiography parameters in patients with mild-to-moderate coronavirus disease 2019. *Anatolian Journal of Cardiology*. 2021;25(3):184.
200. Ionescu F, Grasso-Knight G, Castillo E, Naeem E, Petrescu I, Imam Z, et al. Therapeutic anticoagulation delays death in COVID-19 patients: cross-sectional analysis of a prospective cohort. *TH Open*. 2020;4(03):e263-e70.
201. Ionescu F, Jaiyesimi I, Petrescu I, Lawler PR, Castillo E, Munoz- Maldonado Y, et al. Association of anticoagulation dose and survival in hospitalized COVID- 19 patients: A retrospective propensity score- weighted analysis. *European journal of haematology*. 2021;106(2):165-74.
202. Ip A, Ahn J, Zhou Y, Goy AH, Hansen E, Pecora AL, et al. Hydroxychloroquine in the treatment of outpatients with mildly symptomatic COVID-19: a multi-center observational study. *BMC infectious diseases*. 2021;21(1):1-12.

**Comparative-effectiveness research of COVID-19 treatment: A rapid scoping review**

203. Ip A, Berry DA, Hansen E, Goy AH, Pecora AL, Sinclair BA, et al. Hydroxychloroquine and tocilizumab therapy in COVID-19 patients—an observational study. *PloS one*. 2020;15(8):e0237693.
204. Ivashchenko AA, Dmitriev KA, Vostokova NV, Azarova VN, Blinow AA, Egorova AN, et al. AVIFAVIR for treatment of patients with moderate COVID-19: interim results of a phase II/III multicenter randomized clinical trial. *medRxiv*. 2020.
205. Jagannathan P, Andrews JR, Bonilla H, Hedlin H, Jacobson KB, Balasubramanian V, et al. Peginterferon Lambda-1a for treatment of outpatients with uncomplicated COVID-19: a randomized placebo-controlled trial. *Nature communications*. 2021;12(1):1-10.
206. Jarrett MP, Licht WB, Bock K, Brown Z, Hirsch JS, Coppa K, et al. Early Experience With Neutralizing Monoclonal Antibody Therapy For COVID-19. *medRxiv*. 2021.
207. Jeronimo CMP, Farias MEL, Val FFA, Sampaio VS, Alexandre MAA, Melo GC, et al. Methylprednisolone as adjunctive therapy for patients hospitalized with COVID-19 (Metcovid): a randomised, double-blind, phase IIb, placebo-controlled trial. 2020.
208. Ji J, Wu M, Zhong L, Liu Z, Wang C, Shao Z, et al. Early, low-dose, short-term methylprednisolone decreased the mortality in critical COVID-19 patients: A multicenter retrospective cohort study. *Journal of Infection*. 2021;82(4):84-123.
209. Ji J, Zhang J, Shao Z, Xie Q, Zhong L, Liu Z. Glucocorticoid therapy does not delay viral clearance in COVID-19 patients. *Critical Care*. 2020;24(1):1-4.
210. Jiang W, Li W, Xiong L, Wu Q, Wu J, He B, et al. Clinical efficacy of convalescent plasma therapy on treating COVID-19 patients: Evidence from matched study and a meta-analysis. *Clinical and translational medicine*. 2020;10(8).
211. Jie X, Hongmei Y, Ping F, Kuikui Z, Bohan Y, Rui M. Beneficial effect of Arbidol in the management of COVID-19 infection. *Aging (Albany NY)*. 2021;13(7):9253.
212. Jiménez-Soto R, Aguilar-Soto M, Demichelis R. The impact of different prophylactic anticoagulation doses on the outcomes of patients with COVID-19. *Blood*. 2020;136:17.
213. Jonmarker S, Hollenberg J, Dahlberg M, Stackelberg O, Litorell J, Everhov ÅH, et al. Dosing of thromboprophylaxis and mortality in critically ill COVID-19 patients. *Critical Care*. 2020;24(1):1-10.
214. Jonmarker S, Hollenberg J, Dahlberg M, Stackelberg O, Litorell J, Everhov ÅH, et al. Dosing of thromboprophylaxis and mortality in critically ill COVID-19 patients. *Critical Care*. 2020;24(1):1-10.
215. Joyner MJ, Senefeld JW, Klassen SA, Mills JR, Johnson PW, Theel ES, et al. Effect of convalescent plasma on mortality among hospitalized patients with COVID-19: initial three-month experience. *medrxiv*. 2020.
216. Kalil AC, Patterson TF, Mehta AK, Tomashek KM, Wolfe CR, Ghazaryan V, et al. Baricitinib plus remdesivir for hospitalized adults with Covid-19. *New England Journal of Medicine*. 2021;384(9):795-807.
217. Kalligeros M, Shehadeh F, Atalla E, Mylona EK, Aung S, Pandita A, et al. Hydroxychloroquine use in hospitalised patients with COVID-19: an observational matched cohort study. *Journal of global antimicrobial resistance*. 2020;22:842-4.
218. Kalligeros M, Tashima KT, Mylona EK, Rybak N, Flanigan TP, Farmakiotis D, et al., editors. Remdesivir use compared with supportive care in hospitalized patients with

**Comparative-effectiveness research of COVID-19 treatment: A rapid scoping review**

- severe COVID-19: a single-center experience. *Open forum infectious diseases*; 2020: Oxford University Press US.
219. Kaminski MA, Sunny S, Balabayova K, Kaur A, Gupta A, Abdallah M, et al. Tocilizumab therapy for COVID-19: A comparison of subcutaneous and intravenous therapies. *International Journal of Infectious Diseases*. 2020;101:59-64.
220. Kamran SM, Mirza Z-e-H, Naseem A, Liaqat J, Fazal I, Alamgir W, et al. Therapeutic plasma exchange for coronavirus disease-2019 triggered cytokine release syndrome; a retrospective propensity matched control study. *PloS one*. 2021;16(1):e0244853.
221. Kamran SM, Moeed HA, Zill-e-Humayun Mirza AN, Azam R, Ullah N, Saeed F, et al. Clearing the fog: Is hydroxychloroquine effective in reducing coronavirus disease-2019 progression? A randomized controlled trial. *Cureus*. 2021;13(3).
222. Karolyi M, Pawelka E, Mader T, Omid S, Kelani H, Ely S, et al. Hydroxychloroquine versus lopinavir/ritonavir in severe COVID-19 patients. *Wiener Klinische Wochenschrift*. 2021;133(7):284-91.
223. Katia F, Myriam DP, Ucciferri C, Auricchio A, Di Nicola M, Marchioni M, et al. Efficacy of canakinumab in mild or severe COVID-19 pneumonia. *Immunity, Inflammation and Disease*. 2021;9(2):399-405.
224. Kaushal S, Khan A, Deatrick K, Ng DK, Snyder A, Shah A, et al. Intravenous Mesenchymal Stem Cells in Extracorporeal Oxygenation Patients with Severe COVID-19 Acute Respiratory Distress Syndrome. *medRxiv*. 2020.
225. Keller MJ, Kitsis EA, Arora S, Chen J-T, Agarwal S, Ross MJ, et al. Effect of systemic glucocorticoids on mortality or mechanical ventilation in patients with COVID-19. *Journal of hospital medicine*. 2020;15(8):489.
226. Kelly M, O'Connor R, Townsend L, Coghlan M, Relihan E, Moriarty M, et al. Clinical outcomes and adverse events in patients hospitalised with COVID-19, treated with off-label hydroxychloroquine and azithromycin. *British journal of clinical pharmacology*. 2021;87(3):1150-4.
227. Kewan T, Covut F, Al-Jaghbeer MJ, Rose L, Gopalakrishna K, Akbik B. Tocilizumab for treatment of patients with severe COVID-19: A retrospective cohort study. *EClinicalMedicine*. 2020;24:100418.
228. Khamis F, Al Naabi H, Al Lawati A, Ambusaidi Z, Al Sharji M, Al Barwani U, et al. Randomized controlled open label trial on the use of favipiravir combined with inhaled interferon beta-1b in hospitalized patients with moderate to severe COVID-19 pneumonia. *International Journal of Infectious Diseases*. 2021;102:538-43.
229. Khamis F, Memish Z, Al Bahrani M, Al Nummani H, Al Raisi D, Al Dowaiqi S, et al. The Role of Convalescent Plasma and Tocilizumab in the Management of COVID-19 Infection: A Cohort of 110 Patients from a Tertiary Care Hospital in Oman. *Journal of Epidemiology and Global Health*. 2021;11(2):216-23.
230. Khoo SH, FitzGerald R, Fletcher T, Ewings S, Jaki T, Lyon R, et al. Optimal dose and safety of molnupiravir in patients with early SARS-CoV-2: a phase 1, dose-escalating, randomised controlled study. *medRxiv*. 2021.
231. Kim EJ, Choi SH, Park JS, Kwon YS, Lee J, Kim Y, et al. Use of darunavir-cobicistat as a treatment option for critically ill patients with SARS-CoV-2 infection. *Yonsei Medical Journal*. 2020;61(9):826.

**Comparative-effectiveness research of COVID-19 treatment: A rapid scoping review**

232. Kim J-W, Kim EJ, Kwon HH, Jung CY, Kim KC, Choe J-Y, et al. Lopinavir-ritonavir versus hydroxychloroquine for viral clearance and clinical improvement in patients with mild to moderate coronavirus disease 2019. *The Korean journal of internal medicine.* 2021;36(Suppl 1):S253.
233. Kimmig LM, Wu D, Gold M, Pettit NN, Pitrak D, Mueller J, et al. Il-6 inhibition in critically ill COVID-19 patients is associated with increased secondary infections. *Frontiers in medicine.* 2020;7:689.
234. Kimmig LM, Wu D, Gold M, Pettit NN, Pitrak D, Mueller J, et al. Il-6 inhibition in critically ill COVID-19 patients is associated with increased secondary infections. *Frontiers in medicine.* 2020;7:689.
235. Kirkup C, Pawlowski C, Puranik A, Conrad I, O'Horo JC, Gomaa D, et al. Healthcare disparities among anticoagulation therapies for severe COVID- 19 patients in the multi- site VIRUS registry. *Journal of medical virology.* 2021;93(7):4303-18.
236. Klapholz M, Pentakota SR, Zertuche J-P, McKenna M, Roque W, Forsberg M, et al., editors. *Matched Cohort Study of Convalescent COVID-19 Plasma Treatment in Severely or Life Threateningly Ill COVID-19 Patients.* Open Forum Infectious Diseases; 2021: Oxford University Press US.
237. Klein MN, Wang EW, Zimand P, Beauchamp H, Donis C, Ward MD, et al. Kinetics of SARS-CoV-2 antibody responses pre-COVID-19 and post-COVID-19 convalescent plasma transfusion in patients with severe respiratory failure: an observational case-control study. *Journal of clinical pathology.* 2021.
238. Klopfenstein T, Zayet S, Lohse A, Balblanc J-C, Badie J, Royer P-Y, et al. Tocilizumab therapy reduced intensive care unit admissions and/or mortality in COVID-19 patients. *Medecine et maladies infectieuses.* 2020;50(5):397-400.
239. Klopfenstein T, Zayet S, Lohse A, Selles P, Zahra H, Toko L, et al. Impact of tocilizumab on mortality and/or invasive mechanical ventilation requirement in a cohort of 206 COVID-19 patients. *International Journal of Infectious Diseases.* 2020;99:491-5.
240. Kocayigit H, Demir G, Karacan A, Süner KÖ, Tomak Y, Yaylacı S, et al. Effects on mortality of early vs late administration of convalescent plasma in the treatment of Covid-19. *Transfusion and Apheresis Science.* 2021:103148.
241. Kocayigit H, Özmen Süner K, Tomak Y, Demir G, Yaylacı S, Dheir H, et al. Observational study of the effects of Favipiravir vs Lopinavir/Ritonavir on clinical outcomes in critically ill patients with COVID- 19. *Journal of Clinical Pharmacy and Therapeutics.* 2021;46(2):454-9.
242. Koerper S, Weiss M, Zickler D, Wiesmann T, Zacharowski K, Corman VM, et al. High Dose Convalescent Plasma in COVID-19: Results from the randomized Trial CAPSID. *medRxiv.* 2021.
243. Komissarov A, Molodtsov I, Ivanova O, Maryukhnich E, Kudryavtseva S, Mazus A, et al. High SARS-CoV-2 load in the nasopharynx of patients with a mild form of COVID-19 is associated with clinical deterioration regardless of the hydroxychloroquine administration. *PloS one.* 2021;16(1):e0246396.
244. Kooistra EJ, Waalders NJ, Grondman I, Janssen NA, de Nooijer AH, Netea MG, et al. Anakinra treatment in critically ill COVID-19 patients: a prospective cohort study. *Critical care.* 2020;24(1):1-12.

**Comparative-effectiveness research of COVID-19 treatment: A rapid scoping review**

245. Kumar RN, Wu E-L, Stosor V, Moore WJ, Achenbach C, Ison MG, et al. Real-world experience of bamlanivimab for COVID-19: a case-control study. *Clinical Infectious Diseases: an Official Publication of the Infectious Diseases Society of America*. 2021.
246. Kumar S, De Souza R, Nadkar M, Guleria R, Trikha A, Joshi SR, et al. A two-arm, randomized, controlled, multi-centric, open-label phase-2 study to evaluate the efficacy and safety of Itolizumab in moderate to severe ARDS patients due to COVID-19. *Expert opinion on biological therapy*. 2021;21(5):675-86.
247. Kumari P, Dembra S, Dembra P, Bhawna F, Gul A, Ali B, et al. The role of vitamin C as adjuvant therapy in COVID-19. *Cureus*. 2020;12(11).
248. Kurd R, Ben-Chetrit E, Karameh H, Bar-Meir M. Compassionate Use of Opaganib For Patients with Severe COVID-19. *medRxiv*. 2020.
249. Kyriazopoulou E, Panagopoulos P, Metallidis S, Dalekos GN, Poulakou G, Gatselis N, et al. Anakinra to prevent respiratory failure in COVID-19. *medRxiv*. 2020.
250. Kyriazopoulou E, Poulakou G, Milionis H, Metallidis S, Adamis G, Tsiakos K, et al. Early Anakinra Treatment for COVID-19 Guided by Urokinase Plasminogen Receptor. *medRxiv*. 2021.
251. Lagier J-C, Million M, Gautret P, Colson P, Cortaredona S, Giraud-Gatineau A, et al. Outcomes of 3,737 COVID-19 patients treated with hydroxychloroquine/azithromycin and other regimens in Marseille, France: A retrospective analysis. *Travel medicine and infectious disease*. 2020;36:101791.
252. Lam C, Siefkas A, Zelin NS, Barnes G, Dellinger RP, Vincent J-L, et al. Machine Learning as a Precision-Medicine Approach to Prescribing COVID-19 Pharmacotherapy with Remdesivir or Corticosteroids. *Clinical therapeutics*. 2021.
253. Lamback EB, Oliveira MAd, Haddad AF, Vieira AFM, Ferreira AL, Maia TdS, et al. Hydroxychloroquine with azithromycin in patients hospitalized for mild and moderate COVID-19. *Brazilian Journal of Infectious Diseases*. 2021;25.
254. Lambermont B, Ernst M, Demaret P, Boccar S, Gurdebeke C, Cedric VB, et al. Predictors of Mortality and Effect of Drug Therapies in Mechanically Ventilated Patients With Coronavirus Disease 2019: A Multicenter Cohort Study. *Critical care explorations*. 2020;2(12).
255. Lammers A, Brohet R, Theunissen R, Koster C, Rood R, Verhagen D, et al. Early hydroxychloroquine but not chloroquine use reduces ICU admission in COVID-19 patients. *International Journal of Infectious Diseases*. 2020;101:283-9.
256. Lan X, Shao C, Zeng X, Wu Z, Xu Y. Lopinavir-ritonavir alone or combined with arbidol in the treatment of 73 hospitalized patients with COVID-19: a pilot retrospective study. *MedRxiv*. 2020.
257. Landewé RB, Ramiro S, Mostard RL. COVID-19-induced hyperinflammation, immunosuppression, recovery and survival: how causal inference may help draw robust conclusions. *RMD open*. 2021;7(1):e001638.
258. Langer-Gould A, Smith JB, Gonzales EG, Castillo RD, Figueroa JG, Ramanathan A, et al. Early identification of COVID-19 cytokine storm and treatment with anakinra or tocilizumab. *International Journal of Infectious Diseases*. 2020;99:291-7.
259. Lanzoni G, Linetsky E, Correa D, Messinger Cayetano S, Alvarez RA, Kouroupis D, et al. Umbilical cord mesenchymal stem cells for COVID-19 acute respiratory distress syndrome: A double-blind, phase 1/2a, randomized controlled trial. *Stem cells translational medicine*. 2021;10(5):660-73.

**Comparative-effectiveness research of COVID-19 treatment: A rapid scoping review**

260. Lattman E, Bhalerao P, ShashiBhushan B, Nargundkar N, Lattmann P, Balaram P. Randomized, Comparative, Clinical Trial to Evaluate Efficacy and Safety of PNB001 in Moderate COVID-19 Patients. *medRxiv*. 2021.
261. Lauriola M, Pani A, Ippoliti G, Mortara A, Milighetti S, Mazen M, et al. Effect of Combination Therapy of Hydroxychloroquine and Azithromycin on Mortality in Patients With COVID- 19. *Clinical and translational science*. 2020;13(6):1071-6.
262. Lavinio A, Ercole A, Battaglini D, Magnoni S, Badenes R, Taccone FS, et al. Safety profile of enhanced thromboprophylaxis strategies for critically ill COVID-19 patients during the first wave of the pandemic: observational report from 28 European intensive care units. *Critical Care*. 2021;25(1):1-10.
263. Lawler PR, Goligher EC, Berger JS, Neal MD, McVerry BJ, Nicolau JC, et al. Therapeutic anticoagulation in non-critically ill patients with COVID-19. *medRxiv*. 2021.
264. Lecronier M, Beurton A, Burrel S, Haudebourg L, Deleris R, Le Marec J, et al. Comparison of hydroxychloroquine, lopinavir/ritonavir, and standard of care in critically ill patients with SARS-CoV-2 pneumonia: an opportunistic retrospective analysis. *Critical Care*. 2020;24(1):1-9.
265. Lee HW, Park J, Lee J-K, Park TY, Heo EY. The effect of the timing of dexamethasone administration in patients with COVID-19 pneumonia. *Tuberculosis and respiratory diseases*. 2021.
266. Lemos ACB, do Espírito Santo DA, Salvetti MC, Gilio RN, Agra LB, Pazin-Filho A, et al. Therapeutic versus prophylactic anticoagulation for severe COVID-19: A randomized phase II clinical trial (HESACOVID). *Thrombosis research*. 2020;196:359-66.
267. Lenze EJ, Mattar C, Zorumski CF, Stevens A, Schweiger J, Nicol GE, et al. Fluvoxamine vs placebo and clinical deterioration in outpatients with symptomatic COVID-19: a randomized clinical trial. *Jama*. 2020;324(22):2292-300.
268. Lescure F-X, Honda H, Fowler RA, Lazar JS, Shi G, Wung P, et al. Sarilumab treatment of hospitalised patients with severe or critical COVID-19: a multinational, randomised, adaptive, phase 3, double-blind, placebo-controlled trial. *medRxiv*. 2021.
269. Lewis TC, Adhikari S, Tatapudi V, Holub M, Kunichoff D, Troxel AB, et al. A propensity-matched cohort study of tocilizumab in patients with coronavirus disease 2019. *Critical care explorations*. 2020;2(11).
270. Li C, Luo F, Liu C, Xiong N, Xu Z, Zhang W, et al. Effect of a genetically engineered interferon-alpha versus traditional interferon-alpha in the treatment of moderate-to-severe COVID-19: a randomised clinical trial. *Annals of medicine*. 2021;53(1):391-401.
271. Li G, Yuan M, Li H, Deng C, Wang Q, Tang Y, et al. Safety and efficacy of artemisinin-piperaquine for treatment of COVID-19: an open-label, non-randomised and controlled trial. *International journal of antimicrobial agents*. 2021;57(1):106216.
272. Li H, Xiong N, Li C, Gong Y, Liu L, Yang H, et al. Efficacy of ribavirin and interferon- $\alpha$  therapy for hospitalized patients with COVID-19: A multicenter, retrospective cohort study. *International Journal of Infectious Diseases*. 2021;104:641-8.

**Comparative-effectiveness research of COVID-19 treatment: A rapid scoping review**

273. Li L, Zhang W, Hu Y, Tong X, Zheng S, Yang J, et al. Effect of convalescent plasma therapy on time to clinical improvement in patients with severe and life-threatening COVID-19: a randomized clinical trial. *Jama*. 2020;324(5):460-70.
274. Li M, Gitarts S, Nyabera A, Kondaveeti R, Hammudeh Y, Gonzalez C, et al. Continuous Infusion Low-Dose Unfractionated Heparin for the Management of Hypercoagulability Associated With COVID-19. *Journal of Pharmacy Practice*. 2020:0897190020966207.
275. Li M, Yoo EJ, Baram M, McArthur M, Skeehan C, Awsare B, et al. Tocilizumab in the Management of COVID-19: A Preliminary Report. *The American Journal of the Medical Sciences*. 2021;361(2):208-15.
276. Li M, Yu T, Zhu J, Wang Y, Yang Y, Zhao K, et al. Comparison of the antiviral effect of Arbidol and Chloroquine in treating COVID-19. *Annals of Palliative Medicine*. 2021;10(3):3307-12.
277. Li P, Lu Z, Li Q, Wang Z, Guo Y, Cai C, et al. Administration Timing and Efficacy of Tocilizumab in Patients With COVID-19 and Elevated IL-6. *Frontiers in Molecular Biosciences*. 2021;8.
278. Li Q, Li W, Jin Y, Xu W, Huang C, Li L, et al. Efficacy evaluation of early, low-dose, short-term corticosteroids in adults hospitalized with non-severe COVID-19 pneumonia: a retrospective cohort study. *Infectious diseases and therapy*. 2020;9(4):823-36.
279. Li T, Sun L, Zhang W, Zheng C, Jiang C, Chen M, et al. Bromhexine hydrochloride tablets for the treatment of moderate COVID-19: an open-label randomized controlled pilot study. *Clinical and translational science*. 2020;13(6):1096-102.
280. Li X, Liu L, Yang Y, Yang X, Wang C, Li Y, et al. Gender-associated difference following COVID-19 virus infection: Implications for thymosin alpha-1 therapy. *International Immunopharmacology*. 2021;90:107022.
281. Li Y, Li J, Ke J, Jiao N, Zhu L, Shen L, et al. Adverse outcomes associated with corticosteroid use in critical COVID-19: a retrospective multicenter cohort study. *Frontiers in medicine*. 2021;8.
282. Li Y, Meng Q, Rao X, Wang B, Zhang X, Dong F, et al. Corticosteroid therapy in critically ill patients with COVID-19: a multicenter, retrospective study. *Critical Care*. 2020;24(1):1-10.
283. Li Y, Xie Z, Lin W, Cai W, Wen C, Guan Y, et al. Efficacy and safety of lopinavir/ritonavir or arbidol in adult patients with mild/moderate COVID-19: an exploratory randomized controlled trial. *Med*. 2020;1(1):105-13. e4.
284. Li Y, Zhou X, Li T, Chan S, Yu Y, Ai J-W, et al. Corticosteroid prevents COVID-19 progression within its therapeutic window: a multicentre, proof-of-concept, observational study. *Emerging microbes & infections*. 2020;9(1):1869-77.
285. Lian N, Xie H, Lin S, Huang J, Zhao J, Lin Q. Umifenovir treatment is not associated with improved outcomes in patients with coronavirus disease 2019: a retrospective study. *Clinical Microbiology and Infection*. 2020;26(7):917-21.
286. Liang M-y, Chen P, He M, Tang J, Li H, He X-l, et al. Corticosteroids treatment of patients with coronavirus disease 2019: a propensity score matching study. *Current medical science*. 2021;41(1):24-30.
287. Libster R, Marc GP, Wappner D, Coviello S, Bianchi A, Braem V, et al. Prevention of severe COVID-19 in the elderly by early high-titer plasma. *MedRxiv*. 2020.

**Comparative-effectiveness research of COVID-19 treatment: A rapid scoping review**

288. Libster R, Pérez Marc G, Wappner D, Coviello S, Bianchi A, Braem V, et al. Early high-titer plasma therapy to prevent severe Covid-19 in older adults. *New England Journal of Medicine*. 2021;384(7):610-8.
289. Liesenborghs L, Spriet I, Jochmans D, Belmans A, Gyselinck I, Teuwen L-A, et al. Itraconazole for COVID-19: preclinical studies and a proof-of-concept randomized clinical trial. *EBioMedicine*. 2021;66:103288.
290. Lima-Morales R, Méndez-Hernández P, Flores YN, Osorno-Romero P, Sancho-Hernández CR, Cuecuecha-Rugerio E, et al. Effectiveness of a multidrug therapy consisting of Ivermectin, Azithromycin, Montelukast, and Acetylsalicylic acid to prevent hospitalization and death among ambulatory COVID-19 cases in Tlaxcala, Mexico. *International Journal of Infectious Diseases*. 2021;105:598-605.
291. Liu J, Hua M, Du C, Pu L, Xiang P, Li C, et al. The dual role of anti-viral therapy in the treatment of Coronavirus disease 2019. *European Review for Medical and Pharmacological Sciences*. 2020;24(22):11939-44.
292. Liu J, Zhang S, Dong X, Li Z, Xu Q, Feng H, et al. Corticosteroid treatment in severe COVID-19 patients with acute respiratory distress syndrome. *Journal of Clinical Investigation*. 2020;130(12):6417-28.
293. Liu Q, Huang N, Li A, Zhou Y, Liang L, Song X, et al. Effect of low-dose aspirin on mortality and viral duration of the hospitalized adults with COVID-19. *Medicine*. 2021;100(6).
294. Liu ST, Lin H-M, Baine I, Wajnberg A, Gumprecht JP, Rahman F, et al. Convalescent plasma treatment of severe COVID-19: a propensity score-matched control study. *Nature medicine*. 2020;26(11):1708-13.
295. Liu ST, Lin H-M, Baine I, Wajnberg A, Gumprecht JP, Rahman F, et al. Convalescent plasma treatment of severe COVID-19: a propensity score-matched control study. *Nature medicine*. 2020;26(11):1708-13.
296. Liu Y, Pang Y, Hu Z, Wu M, Wang C, Feng Z, et al. Thymosin alpha 1 (Tα1) reduces the mortality of severe COVID-19 by restoration of lymphocytopenia and reversion of exhausted T cells. *Clinical Infectious Diseases*. 2020.
297. Liu Z, Li X, Fan G, Zhou F, Wang Y, Huang L, et al. Low-to-moderate dose corticosteroids treatment in hospitalized adults with COVID-19. *Clinical Microbiology and Infection*. 2021;27(1):112-7.
298. Lofgren SM, Nicol MR, Bangdiwala AS, Pastick KA, Okafor EC, Skipper CP, et al., editors. Safety of hydroxychloroquine among outpatient clinical trial participants for COVID-19. *Open forum infectious diseases*; 2020: Oxford University Press US.
299. Lofgren SM, Nicol MR, Bangdiwala AS, Pastick KA, Okafor EC, Skipper CP, et al., editors. Safety of hydroxychloroquine among outpatient clinical trial participants for COVID-19. *Open forum infectious diseases*; 2020: Oxford University Press US.
300. Lopardo G, Belloso WH, Nannini E, Colonna M, Sanguineti S, Zylberman V, et al. RBD-specific polyclonal F(ab')<sub>2</sub> fragments of equine antibodies in patients with moderate to severe COVID-19 disease: A randomized, multicenter, double-blind, placebo-controlled, adaptive phase 2/3 clinical trial. *EClinicalMedicine*. 2021;34:100843.
301. Lopes MI, Bonjorno LP, Giannini MC, Amaral NB, Menezes PI, Dib SM, et al. Beneficial effects of colchicine for moderate to severe COVID-19: a randomised, double-blinded, placebo-controlled clinical trial. *RMD open*. 2021;7(1):e001455.



**Comparative-effectiveness research of COVID-19 treatment: A rapid scoping review**

302. Lopes MIF, Bonjorno LP, Giannini MC, Amaral NB, Benatti MN, Rezek UC, et al. Beneficial effects of colchicine for moderate to severe COVID-19: an interim analysis of a randomized, double-blinded, placebo controlled clinical trial. *MedRxiv*. 2020.
303. Lopez A, Duclos G, Pastene B, Bezulier K, Guilhaumou R, Solas C, et al. Effects of hydroxychloroquine on Covid-19 in intensive care unit patients: preliminary results. *International journal of antimicrobial agents*. 2020;56(5):106136.
304. López-Medina E, López P, Hurtado IC, Dávalos DM, Ramirez O, Martínez E, et al. Effect of ivermectin on time to resolution of symptoms among adults with mild COVID-19: a randomized clinical trial. *Jama*. 2021;325(14):1426-35.
305. López-Medrano F, Asín MAP-J, Fernández-Ruiz M, Carretero O, Lalueza A, de la Calle GM, et al. Combination therapy with tocilizumab and corticosteroids for aged patients with severe COVID-19 pneumonia: a single-center retrospective study. *International Journal of Infectious Diseases*. 2021;105:487-94.
306. López-Medrano F, Asín MAP-J, Fernández-Ruiz M, Carretero O, Lalueza A, de la Calle GM, et al. Combination therapy with tocilizumab and corticosteroids for aged patients with severe COVID-19 pneumonia: a single-center retrospective study. *International Journal of Infectious Diseases*. 2021;105:487-94.
307. Lotfy SM, Abbas A, Shouman W. Use of Hydroxychloroquine in patients with COVID-19: a retrospective observational study. *Turkish Thoracic Journal*. 2021;22(1):62.
308. Lou Y, Liu L, Yao H, Hu X, Su J, Xu K, et al. Clinical outcomes and plasma concentrations of baloxavir marboxil and favipiravir in COVID-19 patients: an exploratory randomized, controlled trial. *European Journal of Pharmaceutical Sciences*. 2021;157:105631.
309. Lu J, Zhou A, Zhang X, Xu H, Wang X, Ye Q, et al. Safety and efficacy of oral lopinavir/ritonavir in pediatric patients with coronavirus disease: a nationwide comparative analysis. *Eur Rev Med Pharmacol Sci*. 2021;25(1):549-55.
310. Lu X, Chen T, Wang Y, Wang J, Yan F. Adjuvant corticosteroid therapy for critically ill patients with COVID-19. *Critical Care*. 2020;24:1-4.
311. Lu Y, Liu F, Tong G, Qiu F, Song P, Wang X, et al. Clinical evidence of an interferon–glucocorticoid therapeutic synergy in COVID-19. *Signal transduction and targeted therapy*. 2021;6(1):1-11.
312. Luis B-M, Miguel M-B, Pedro D-L, David I-P, Itziar A, Ana G-H, et al. Benefits of early aggressive immunomodulatory therapy (tocilizumab and methylprednisolone) in COVID-19: single center cohort study of 685 patients. *Journal of translational autoimmunity*. 2021:100086.
313. Luis B-M, Miguel M-B, Pedro D-L, David I-P, Itziar A, Ana G-H, et al. Benefits of early aggressive immunomodulatory therapy (tocilizumab and methylprednisolone) in COVID-19: single center cohort study of 685 patients. *Journal of translational autoimmunity*. 2021:100086.
314. Lyngbakken MN, Berdal J-E, Eskesen A, Kvale D, Olsen IC, Rueegg CS, et al. A pragmatic randomized controlled trial reports lack of efficacy of hydroxychloroquine on coronavirus disease 2019 viral kinetics. *Nature communications*. 2020;11(1):1-6.

**Comparative-effectiveness research of COVID-19 treatment: A rapid scoping review**

315. Lynn L, Reyes JA, Hawkins K, Panda A, Linville L, Aldhahri W, et al. The effect of anticoagulation on clinical outcomes in novel Coronavirus (COVID-19) pneumonia in a US cohort. *Thrombosis research*. 2021;197:65-8.
316. Ma Q, Qi D, Deng X, Yuan G, Tian W, Cui Y, et al. Corticosteroid therapy for patients with severe novel Coronavirus disease 2019. *Eur Rev Med Pharmacol Sci*. 2020;8194-201.
317. Ma Y, Zeng H, Zhan Z, Lu H, Zeng Z, He C, et al. Corticosteroid use in the treatment of COVID-19: a multicenter retrospective study in hunan, China. *Frontiers in pharmacology*. 2020;11:1198.
318. Magagnoli J, Narendran S, Pereira F, Cummings TH, Hardin JW, Sutton SS, et al. Outcomes of hydroxychloroquine usage in United States veterans hospitalized with Covid-19. *Med*. 2020;1(1):114-27. e3.
319. Mahajan L, AP Singh G. Clinical outcomes of using remdesivir in patients with moderate to severe COVID-19: A prospective randomised study. *Indian Journal of Anaesthesia*. 2021;65(Suppl 1):S41.
320. Mahapatra S, Rattan R, Mohanty C. Convalescent Plasma Therapy in the management of COVID-19 patients-The newer dimensions. *Transfusion Clinique et Biologique*. 2021.
321. Mahévas M, Tran V-T, Roumier M, Chabrol A, Paule R, Guillaud C, et al. Clinical efficacy of hydroxychloroquine in patients with covid-19 pneumonia who require oxygen: observational comparative study using routine care data. *Bmj*. 2020;369.
322. Mahmud R, Rahman MM, Alam I, Ahmed KGU, Kabir AH, Sayeed SJB, et al. Ivermectin in combination with doxycycline for treating COVID-19 symptoms: a randomized trial. *Journal of International Medical Research*. 2021;49(5):03000605211013550.
323. Majmundar M, Kansara T, Lenik JM, Park H, Ghosh K, Doshi R, et al. Efficacy of corticosteroids in non-intensive care unit patients with COVID-19 pneumonia from the New York Metropolitan region. *PloS one*. 2020;15(9):e0238827.
324. Maldonado V, Hernandez-Ramírez C, Oliva-Pérez EA, Sánchez-Martínez CO, Pimentel-González JF, Molina-Sánchez JR, et al. Pentoxifylline decreases serum LDH levels and increases lymphocyte count in COVID-19 patients: results from an external pilot study. *International Immunopharmacology*. 2021;90:107209.
325. Mallat J, Hamed F, Maher Balkis MAM, Mooty M, Malik A, Nusair A, et al. Hydroxychloroquine is associated with slower viral clearance in clinical COVID-19 patients with mild to moderate disease. *Medicine*. 2020;99(52).
326. Mancilla-Galindo J, García-Méndez JÓ, Márquez-Sánchez J, Reyes-Casarrubias RE, Aguirre-Aguilar E, Rocha-González HI, et al. All-cause mortality among patients treated with repurposed antivirals and antibiotics for COVID-19 in Mexico City: A real-world observational study. *EXCLI journal*. 2021;20:199.
327. Manenti L, Maggiore U, Fiaccadori E, Meschi T, Antoni AD, Nouvenne A, et al. Reduced mortality in COVID-19 patients treated with colchicine: Results from a retrospective, observational study. *PloS one*. 2021;16(3):e0248276.
328. Manosuthi W, Jeungsmarn S, Okada P, Suwanvattana P, Wongboot W, Thawornwan U, et al. Nasopharyngeal SARS-CoV-2 Viral Load Response among COVID-19 Patients Receiving Favipiravir. *Japanese Journal of Infectious Diseases*. 2021:JJID. 2020.827.

**Comparative-effectiveness research of COVID-19 treatment: A rapid scoping review**

329. Mansour E, Palma AC, Ulaf RG, Ribeiro LC, Bernardes AF, Nunes TA, et al. Safety and Outcomes Associated with the Pharmacological Inhibition of the Kinin–Kallikrein System in Severe COVID-19. *Viruses*. 2021;13(2):309.
330. Marconi VC, Ramanan AV, de Bono S, Kartman CE, Krishnan V, Liao R, et al. Baricitinib plus standard of care for hospitalized adults with COVID-19. *medRxiv*. 2021.
331. Mareev VY, Orlova YA, Pavlikova E, Matskeplishvili S, Krasnova T, Malahov P, et al. Steroid pulse-therapy in patients With coronAvirus Pneumonia (COVID-19), sYstemic inFLammation And Risk of vEnous thRombosis and thromboembolism (WAYFARER Study). *Kardiologiya*. 2020;60(6):15-29.
332. Mareev VY, Orlova YA, Plisyk A, Pavlikova E, Matskeplishvili S, Akopyan Z, et al. Results of open-label non-randomized comparative clinical trial:“Bromhexine and spironolactone for coronavirus infection requiring hospitalization (BISCUIT). *Kardiologiya*. 2020;60(11):4-15.
333. Martinelli I, Ciavarella A, Abbattista M, Aliberti S, De Zan V, Folli C, et al. Increasing dosages of low-molecular-weight heparin in hospitalized patients with Covid-19. *Internal and emergency medicine*. 2021:1-7.
334. Martínez-Sanz J, Muriel A, Ron R, Herrera S, Pérez-Molina JA, Moreno S, et al. Effects of tocilizumab on mortality in hospitalized patients with COVID-19: a multicentre cohort study. *Clinical Microbiology and Infection*. 2021;27(2):238-43.
335. Martínez-Sanz J, Muriel A, Ron R, Herrera S, Pérez-Molina JA, Moreno S, et al. Effects of tocilizumab on mortality in hospitalized patients with COVID-19: a multicentre cohort study. *Clinical Microbiology and Infection*. 2021;27(2):238-43.
336. Martínez-Urbistondo D, Costa Segovia R, Suárez del Villar Carrero R, Risco Risco C, Villares Fernández P. Early combination of tocilizumab and corticosteroids: An upgrade in anti-inflammatory Therapy for severe coronavirus disease (COVID). *Clinical Infectious Diseases*. 2021;72(9):1682-3.
337. Masiá M, Fernández-González M, Padilla S, Ortega P, García JA, Agulló V, et al. Impact of interleukin-6 blockade with tocilizumab on SARS-CoV-2 viral kinetics and antibody responses in patients with COVID-19: A prospective cohort study. *EBioMedicine*. 2020;60:102999.
338. Mather JF, Seip RL, McKay RG. Impact of famotidine use on clinical outcomes of hospitalized patients with COVID-19. *The American journal of gastroenterology*. 2020.
339. Mazloomzadeh S, Khaleghparast S, Ghadrdoost B, Mousavizadeh M, Baay MR, Noohi F, et al. Effect of intermediate-dose vs standard-dose prophylactic anticoagulation on thrombotic events, extracorporeal membrane oxygenation treatment, or mortality among patients with COVID-19 admitted to the intensive care unit: the INSPIRATION randomized clinical trial. *Jama*. 2021;325(16):1620-30.
340. Mehboob R, Ahmad F, Qayyum A, Rana MA, Gilani SA, Tariq MA, et al. Aprepitant as a combinant with Dexamethasone reduces the inflammation via Neurokinin 1 Receptor Antagonism in severe to critical Covid-19 patients and potentiates respiratory recovery: A novel therapeutic approach. *medRxiv*. 2020.
341. Mehta M, Purpura LJ, McConville TH, Neidell MJ, Anderson MR, Bernstein EJ, et al. What about tocilizumab? A retrospective study from a NYC Hospital during the COVID-19 outbreak. *PLoS one*. 2021;16(4):e0249349.

**Comparative-effectiveness research of COVID-19 treatment: A rapid scoping review**

342. Mehta RM, Bansal S, Bysani S, Kalpakam H. A shorter symptom onset to remdesivir treatment (SORT) interval is associated with a lower mortality in moderate-to-severe COVID-19: A real-world analysis. *International Journal of Infectious Diseases*. 2021;106:71-7.
343. Mehta RM, Bansal S, Bysani S, Kalpakam H. A shorter symptom onset to remdesivir treatment (SORT) interval is associated with a lower mortality in moderate-to-severe COVID-19: A real-world analysis. *International Journal of Infectious Diseases*. 2021;106:71-7.
344. Meizlish ML, Goshua G, Liu Y, Fine R, Amin K, Chang E, et al. Intermediate- dose anticoagulation, aspirin, and in- hospital mortality in COVID- 19: A propensity score- matched analysis. *American journal of hematology*. 2021;96(4):471-9.
345. Memel ZN, Lee JJ, Foulkes AS, Chung RT, Thaweethai T, Bloom PP. Statins Are Associated with Improved 28-day Mortality in Patients Hospitalized with SARS-CoV-2 Infection. *medRxiv*. 2021.
346. Memel ZN, Lee JJ, Foulkes AS, Chung RT, Thaweethai T, Bloom PP. Statins Are Associated with Improved 28-day Mortality in Patients Hospitalized with SARS-CoV-2 Infection. *medRxiv*. 2021.
347. Méndez-Flores S, Priego-Ranero Á, Azamar-Llamas D, Olvera-Prado H, Rivas-Redondo KI, Ochoa-Hein E, et al. Effect of polymerized type I collagen in hyperinflammation of adult outpatients with symptomatic COVID-19: a double blind, randomised, placebo-controlled clinical trial. *medRxiv*. 2021.
348. Meng F, Xu R, Wang S, Xu Z, Zhang C, Li Y, et al. Human umbilical cord-derived mesenchymal stem cell therapy in patients with COVID-19: a phase 1 clinical trial. *Signal transduction and targeted therapy*. 2020;5(1):1-7.
349. Mennuni MG, Renda G, Grisafi L, Rognoni A, Colombo C, Lio V, et al. Clinical outcome with different doses of low-molecular-weight heparin in patients hospitalized for COVID-19. *Journal of Thrombosis and Thrombolysis*. 2021:1-9.
350. Menzella F, Fontana M, Salvarani C, Massari M, Ruggiero P, Scelfo C, et al. Efficacy of tocilizumab in patients with COVID-19 ARDS undergoing noninvasive ventilation. *Critical Care*. 2020;24(1):1-9.
351. Mercurio NJ, Yen CF, Shim DJ, Maher TR, McCoy CM, Zimetbaum PJ, et al. Risk of QT interval prolongation associated with use of hydroxychloroquine with or without concomitant azithromycin among hospitalized patients testing positive for coronavirus disease 2019 (COVID-19). *JAMA cardiology*. 2020;5(9):1036-41.
352. Mesina FZ, Mangahas CG, Gatchalian EM, Ramos MSA, Torres RP. Use of Convalescent Plasma Therapy among Hospitalized Coronavirus Disease 2019 (COVID-19) Patients: A Single-Center Experience. *medRxiv*. 2021.
353. Mikulska M, Nicolini LA, Signori A, Di Biagio A, Sepulcri C, Russo C, et al. Tocilizumab and steroid treatment in patients with COVID-19 pneumonia. *Plos one*. 2020;15(8):e0237831.
354. Miller J, Bruen C, Schnaus M, Zhang J, Ali S, Lind A, et al. Auxora versus standard of care for the treatment of severe or critical COVID-19 pneumonia: results from a randomized controlled trial. *Critical Care*. 2020;24(1):1-9.
355. Milzman D, Waud K, Sommers D. 308: Army Medical PPE for COVID-19 Pandemic: Javits, New York City: 1200 Patients, 170 Providers, 0 Cases. *Critical Care Medicine*. 2021;49(1):141.

**Comparative-effectiveness research of COVID-19 treatment: A rapid scoping review**

356. Mitjà O, Corbacho-Monné M, Ubals M, Tebe C, Peñafiel J, Tobias A, et al. Hydroxychloroquine for early treatment of adults with mild Covid-19: a randomized-controlled trial. *Clinical Infectious Diseases*. 2020.
357. Moll M, Zon RL, Sylvester KW, Rimsans J, Chen EC, Ghosh AJ, et al. Intermediate versus standard dose heparin prophylaxis in COVID-19 ICU patients: A propensity score-matched analysis. *Thrombosis Research*. 2021;203:57-60.
358. Monedero P, Gea A, Castro P, Candela-Toha AM, Hernández-Sanz ML, Arruti E, et al. Early corticosteroids are associated with lower mortality in critically ill patients with COVID-19: a cohort study. *Critical Care*. 2021;25(1):1-13.
359. Moni M, Madathil T, Sathyapalan D, Menon V, Gutjahr G, Edathadathil F, et al. A Feasibility Trial to Evaluate the Composite Efficacy of Inhaled Nitric Oxide in the Treatment of Covid 19 Pneumonia: Impact on Viral Load and Clinical Outcomes. medRxiv. 2021.
360. Monk PD, Marsden RJ, Tear VJ, Brookes J, Batten TN, Mankowski M, et al. Safety and efficacy of inhaled nebulised interferon beta-1a (SNG001) for treatment of SARS-CoV-2 infection: a randomised, double-blind, placebo-controlled, phase 2 trial. *The Lancet Respiratory Medicine*. 2021;9(2):196-206.
361. Monreal E, de la Maza SS, Natera-Villalba E, Beltrán-Corbellini Á, Rodríguez-Jorge F, Fernández-Velasco JI, et al. High versus standard doses of corticosteroids in severe COVID-19: a retrospective cohort study. *European Journal of Clinical Microbiology & Infectious Diseases*. 2021;40(4):761-9.
362. Moreno-García E, Rico V, Albiach L, Agüero D, Ambrosioni J, Bodro M, et al. Tocilizumab reduces the risk of ICU admission and mortality in patients with SARS-CoV-2 infection. *Revista Española de Quimioterapia*. 2021;34(3):238.
363. Moschini L, Loffi M, Regazzoni V, Di Tano G, Gherbesi E, Danzi GB. Effects on QT interval of hydroxychloroquine associated with ritonavir/darunavir or azithromycin in patients with SARS-CoV-2 infection. *Heart and vessels*. 2021;36(1):115-20.
364. Motta JK, Ogunnaike RO, Shah R, Stroever S, Cedeño HV, Thapa SK, et al. Clinical Outcomes With the Use of Prophylactic Versus Therapeutic Anticoagulation in Coronavirus Disease 2019. *Critical Care Explorations*. 2020;2(12).
365. Mughal MS, Kaur I, Kakadia M, Wang C, Alhashemi R, Salloum R, et al. Is there any additional benefit of multiple doses of tocilizumab in COVID-19 patients? *Cureus*. 2020;12(12).
366. Murai IH, Fernandes AL, Sales LP, Pinto AJ, Goessler KF, Duran CS, et al. Effect of Vitamin D3 Supplementation vs Placebo on Hospital Length of Stay in Patients with Severe COVID-19: A Multicenter, Double-blind, Randomized Controlled Trial. medRxiv. 2020.
367. Murai IH, Fernandes AL, Sales LP, Pinto AJ, Goessler KF, Duran CS, et al. Effect of a single high dose of vitamin D3 on hospital length of stay in patients with moderate to severe COVID-19: a randomized clinical trial. *Jama*. 2021;325(11):1053-60.
368. Nadkarni GN, Lala A, Bagiella E, Chang HL, Moreno PR, Pujadas E, et al. Anticoagulation, bleeding, mortality, and pathology in hospitalized patients with COVID-19. *Journal of the American College of Cardiology*. 2020;76(16):1815-26.
369. Narain S, Stefanov DG, Chau AS, Weber AG, Marder G, Kaplan B, et al. Comparative survival analysis of immunomodulatory therapy for COVID-19 'cytokine storm': A retrospective observational cohort study. *Northwell COVID-19 Research*

**Comparative-effectiveness research of COVID-19 treatment: A rapid scoping review**

- Consortium, Comparative Survival Analysis of Immunomodulatory Therapy for COVID-19 'Cytokine Storm': A Retrospective Observational Cohort Study (6/9/2020). 2020.
370. Narain S, Stefanov DG, Chau AS, Weber AG, Marder G, Kaplan B, et al. Comparative survival analysis of immunomodulatory therapy for coronavirus disease 2019 cytokine storm. *Chest*. 2021;159(3):933-48.
371. Negrut N, Codrean A, Hodisan I, Bungau S, Tit DM, Marin R, et al. Efficiency of antiviral treatment in COVID-19. *Experimental and Therapeutic Medicine*. 2021;21(6):1-7.
372. Nelson BC, Laracy J, Shoucri S, Dietz D, Zucker J, Patel N, et al. Clinical outcomes associated with methylprednisolone in mechanically ventilated patients with COVID-19. *Clinical Infectious Diseases*. 2021;72(9):e367-e72.
373. Niwas R, Garg M, lakshmi Nag V, Bhatia PK, Dutt N, Chauhan N, et al. Clinical outcome, viral response and safety profile of chloroquine in COVID-19 patients—initial experience. *Advances in respiratory medicine*. 2020;88(6):515-9.
374. Nojomi M, Yassin Z, Keyvani H, Makiani MJ, Roham M, Laali A, et al. Effect of Arbidol (Umifenovir) on COVID-19: a randomized controlled trial. *BMC infectious diseases*. 2020;20(1):1-10.
375. Nourian A, Khalili H, Ahmadinejad Z, Kouchak HE, Jafari S, Manshadi SAD, et al. Efficacy and safety of sofosbuvir/ledipasvir in treatment of patients with COVID-19: A randomized clinical trial. *Acta Bio Medica: Atenei Parmensis*. 2020;91(4).
376. Obata R, Maeda T, Do DR, Kuno T. Increased secondary infection in COVID-19 patients treated with steroids in New York City. *Japanese journal of infectious diseases*. 2020;10.
377. O'Donnell MR, Grinsztejn B, Cummings MJ, Justman JE, Lamb MR, Eckhardt CM, et al. A randomized double-blind controlled trial of convalescent plasma in adults with severe COVID-19. *The Journal of Clinical Investigation*. 2021.
378. Okoh AK, Bishburg E, Grinberg S, Nagarakanti S. Tocilizumab use in COVID-19-associated pneumonia. *Journal of medical virology*. 2021;93(2):1023-8.
379. Okumuş N, Demirtürk N, Çetinkaya RA, Güner R, Avcı İY, Orhan S, et al. Evaluation of the effectiveness and safety of adding ivermectin to treatment in severe COVID-19 patients. *BMC infectious diseases*. 2021;21(1):1-11.
380. Olender SA, Perez KK, Go AS, Balani B, Price-Haywood EG, Shah NS, et al. Remdesivir for severe COVID-19 versus a cohort receiving standard of care. *Clinical Infectious Diseases*. 2020.
381. Omrani AS, Pathan SA, Thomas SA, Harris TR, Coyle PV, Thomas CE, et al. Randomized double-blinded placebo-controlled trial of hydroxychloroquine with or without azithromycin for virologic cure of non-severe Covid-19. *EClinicalMedicine*. 2020;29:100645.
382. Omrani AS, Zaqout A, Baiou A, Daghfal J, Elkum N, Alattar RA, et al. Convalescent plasma for the treatment of patients with severe coronavirus disease 2019: a preliminary report. *Journal of Medical Virology*. 2021;93(3):1678-86.
383. Ong SWX, Tan WYT, Chan YH, Fong SW, Renia L, Ng LF, et al. Safety and potential efficacy of cyclooxygenase-2 inhibitors in coronavirus disease 2019. *Clinical & translational immunology*. 2020;9(7):e1159.

**Comparative-effectiveness research of COVID-19 treatment: A rapid scoping review**

384. Ooi ST, Parthasarathy P, Lin Y, Nallakaruppan V, Ng S, Tan TC, et al. Adjunctive Corticosteroids for COVID-19: A Retrospective Cohort Study. medRxiv. 2020.
385. Ooi ST, Parthasarathy P, Lin Y, Nallakaruppan VDO, Ng S, Tan TC, et al., editors. Antivirals With Adjunctive Corticosteroids Prevent Clinical Progression of Early Coronavirus 2019 Pneumonia: A Retrospective Cohort Study. Open Forum Infectious Diseases; 2020: Oxford University Press US.
386. Owen RR, Qizilbash N, Diaz SV, Vazquez JMC, Pocock SJ. Making sense of non-randomized comparative treatment studies in times of Covid-19: A case study of tocilizumab. medRxiv. 2021.
387. Paccoud O, Tubach F, Baptiste A, Bleibtreu A, Hajage D, Monsel G, et al. Compassionate use of hydroxychloroquine in clinical practice for patients with mild to severe Covid-19 in a French university hospital. Clinical Infectious Diseases. 2020.
388. Padilla R, Arquette J, Mai Y, Singh G, Galang K, Liang E. Clinical Outcomes of COVID-19 Patients Treated with Convalescent Plasma or Remdesivir Alone and in Combination at a Community Hospital in California's Central Valley. Journal of Pharmacy & Pharmaceutical Sciences. 2021;24:210-9.
389. Padmanabhan U, Mukherjee S, Borse R, Joshi S, Deshmukh R. Phase II Clinical trial for Evaluation of BCG as potential therapy for COVID-19. medRxiv. 2020.
390. Panagopoulos P, Petrakis V, Panopoulou M, Trypsianis G, Penlioglou T, Pnevmatikos I, et al. Lopinavir/ritonavir as a third agent in the antiviral regimen for SARS-CoV-2 infection. Journal of Chemotherapy. 2021;33(3):193-7.
391. Pandit A, Bhalani N, Bhushan BS, Koradia P, Gargiya S, Bhomia V, et al. Efficacy and safety of pegylated interferon alfa-2b in moderate COVID-19: A phase II, randomized, controlled, open-label study. International Journal of Infectious Diseases. 2021;105:516-21.
392. Pang J, Xu F, Aondio G, Li Y, Fumagalli A, Lu M, et al. Efficacy and tolerability of bevacizumab in patients with severe Covid-19. Nature communications. 2021;12(1):1-10.
393. Paolisso P, Bergamaschi L, D'Angelo EC, Donati F, Giannella M, Tedeschi S, et al. Preliminary experience with low molecular weight heparin strategy in COVID-19 patients. Frontiers in pharmacology. 2020;11:1124.
394. Papamanoli A, Yoo J, Grewal P, Predun W, Hotelling J, Jacob R, et al. High- dose methylprednisolone in nonintubated patients with severe COVID- 19 pneumonia. European journal of clinical investigation. 2021;51(2):e13458.
395. Pappa V, Bouchla A, Terpos E, Thomopoulos TP, Rosati M, Stellas D, et al. A Phase II Study on the Use of Convalescent Plasma for the Treatment of Severe COVID-19- A Propensity Score-Matched Control Analysis. Microorganisms. 2021;9(4):806.
396. Pareja JFP, García-Caballero R, Rangel LS, Vázquez-Ronda MA, Franco SR, Jiménez GN, et al. Effectiveness of glucocorticoids in patients hospitalized for severe SARS-CoV-2 pneumonia. Medicina Clínica (English Edition). 2021;156(5):221-8.
397. Pasquini Z, Montalti R, Temperoni C, Canovari B, Mancini M, Tempesta M, et al. Effectiveness of remdesivir in patients with COVID-19 under mechanical ventilation in an Italian ICU. Journal of Antimicrobial Chemotherapy. 2020;75(11):3359-65.
398. Patel J, Beishuizen A, Ruiz XB, Boughanmi H, Cahn A, Criner GJ, et al. A Randomized Trial of Otilimab in Severe COVID-19 Pneumonia (OSCAR). medRxiv. 2021.

**Comparative-effectiveness research of COVID-19 treatment: A rapid scoping review**

399. Patel NG, Bhasin A, Feinglass JM, Belknap SM, Angarone MP, Cohen ER, et al. Clinical outcomes of hospitalized patients with COVID-19 on therapeutic anticoagulants. *medRxiv*. 2020.
400. Patel O, Chinni V, El- Khoury J, Perera M, Neto AS, McDonald C, et al. A pilot double- blind safety and feasibility randomized controlled trial of high- dose intravenous zinc in hospitalized COVID- 19 patients. *Journal of medical virology*. 2021;93(5):3261-7.
401. Pavoni V, Gianesello L, Pazzi M, Stera C, Meconi T, Frigieri FC. Venous thromboembolism and bleeding in critically ill COVID-19 patients treated with higher than standard low molecular weight heparin doses and aspirin: a call to action. *Thrombosis research*. 2020;196:313-7.
402. Pawlowski C, Venkatakrishnan A, Kirkup C, Berner G, Puranik A, O'Horo JC, et al. Enoxaparin is associated with lower rates of mortality than unfractionated Heparin in hospitalized COVID-19 patients. *EClinicalMedicine*. 2021;33:100774.
403. Pedretti Z, Powell B, Hedrick T, Murray B, Fischer W. 197: Characterization of Cytokine Expression in Critically Ill Patients With COVID-19. *Critical Care Medicine*. 2021;49(1):84.
404. Pereda R, González D, Rivero HB, Rivero JC, Pérez A, Lopez LDR, et al. Therapeutic effectiveness of interferon alpha 2b treatment for COVID-19 patient recovery. *Journal of Interferon & Cytokine Research*. 2020;40(12):578-88.
405. Pereda R, González D, Rivero HB, Rivero JC, Pérez A, López LDR, et al. Therapeutic effectiveness of interferon- $\alpha$ 2b against COVID-19: the Cuban experience. *Journal of Interferon & Cytokine Research*. 2020;40(9):438-42.
406. Pereira MR, Aversa MM, Farr MA, Miko BA, Aaron JG, Mohan S, et al. Tocilizumab for severe COVID- 19 in solid organ transplant recipients: a matched cohort study. *American Journal of Transplantation*. 2020;20(11):3198-205.
407. Perlin DS, Neil GA, Anderson C, Zafir-Lavie I, Roadcap L, Raines S, et al. CERC-002, a human anti-LIGHT mAb reduces respiratory failure and death in hospitalized COVID-19 ARDS patients. *medRxiv*. 2021.
408. Pesavento R, Ceccato D, Pasquetto G, Monticelli J, Leone L, Frigo A, et al. The hazard of (sub) therapeutic doses of anticoagulants in non- critically ill patients with Covid- 19: the Padua province experience. *Journal of Thrombosis and Haemostasis*. 2020;18(10):2629-35.
409. Peters EJ, Collard D, Van Assen S, Beudel M, Bomers MK, Buijs J, et al. Outcomes of persons with coronavirus disease 2019 in hospitals with and without standard treatment with (hydroxy) chloroquine. *Clinical Microbiology and Infection*. 2021;27(2):264-8.
410. Petrak RM, Skorodin NC, Van Hise NW, Fliegelman RM, Pinsky J, Didwania V, et al. Tocilizumab as a therapeutic agent for critically ill patients infected with SARS-CoV- 2. *Clinical and Translational Science*. 2020.
411. Pettit NN, Nguyen CT, Mutlu GM, Wu D, Kimmig L, Pitrak D, et al. Late onset infectious complications and safety of tocilizumab in the management of COVID-19. *Journal of Medical Virology*. 2021;93(3):1459-64.
412. Piniella-Ruiz E, Bellver-Álvarez MT, Mestre-Gómez B, Escolano-Fernández B, Vinat-Prado S, Cabezas-Olea R, et al. Impact of systemic corticosteroids on mortality



**Comparative-effectiveness research of COVID-19 treatment: A rapid scoping review**

- in older adults with critical COVID-19 pneumonia. *The Journals of Gerontology: Series A*. 2021.
413. Pisano E, Bonino C, Arena A, Montanari G, Cerbone F, Umbrello M, et al. Effect of different corticosteroid regimens on the outcome of patients with severe COVID-19-related acute respiratory failure. *Intensive Care Medicine Experimental*. 2020.
414. Piva S, DiBlasi RM, Slee AE, Jobe AH, Roccaro AM, Filippini M, et al. Surfactant therapy for COVID-19 related ARDS: a retrospective case-control pilot study. *Respiratory research*. 2021;22(1):1-8.
415. Plaze M, Attali D, Petit AC, Blatzer M, Simon-Lorieri E, Vinckier F, Cachia A, Chrétien F, Gaillard R. Repurposing chlorpromazine to treat COVID-19: The reCoVery study. *Encephale*. 2020;46(3):169-172.
416. Pontali E, Volpi S, Signori A, Antonucci G, Castellaneta M, Buzzi D, et al. Efficacy of early anti-inflammatory treatment with high doses of intravenous anakinra with or without glucocorticoids in patients with severe COVID-19 pneumonia. *Journal of Allergy and Clinical Immunology*. 2021;147(4):1217-25.
417. Potere N, Di Nisio M, Cibelli D, Scurti R, Frattari A, Porreca E, et al. Interleukin-6 receptor blockade with subcutaneous tocilizumab in severe COVID-19 pneumonia and hyperinflammation: a case-control study. *Annals of the Rheumatic Diseases*. 2021;80(2):1-2.
418. Potere N, Di Nisio M, Rizzo G, La Vella M, Polilli E, Agostinone A, et al. Low-dose subcutaneous tocilizumab to prevent disease progression in patients with moderate COVID-19 pneumonia and hyperinflammation. *International Journal of Infectious Diseases*. 2020;100:421-4.
419. Pott-Junior H, Paoliello MMB, Miguel AdQC, da Cunha AF, de Melo Freire CC, Neves FF, et al. Use of ivermectin in the treatment of Covid-19: A pilot trial. *Toxicology Reports*. 2021;8:505-10.
420. Pouladzadeh M, Safdarian M, Eshghi P, Abolghasemi H, Sheibani B, Choghakabodi PM, et al. A randomized clinical trial evaluating the immunomodulatory effect of convalescent plasma on COVID-19-related cytokine storm. *Internal and emergency medicine*. 2021:1-11.
421. Prandoni P, Cattelan AM, Carrozzi L, Leone L, Filippi L, De Gaudenzi E, et al. The hazard of fondaparinux in non-critically ill patients with COVID-19: Retrospective controlled study versus enoxaparin. *Thrombosis Research*. 2020;196:395-7.
422. Qu J, Li GH, Wang JJ, He GF, Huang JJ, Chen Y, et al. Comparative effectiveness of Lopinavir/Ritonavir- based regimens in COVID- 19. *Clinical and Experimental Pharmacology and Physiology*. 2021;48(2):203-10.
423. Rachman BE, Miatmoko A, Lardo S, Purnama YI, Laely M, Rochmad I, et al. A Randomized, Double-Blind, Multicenter Clinical Study Comparing the Efficacy and Safety of a Drug Combination of Lopinavir/Ritonavir-Azithromycin, Lopinavir/Ritonavir-Doxycycline, and Azithromycin-Hydroxychloroquine for Patients Diagnosed with Mild to Moderate COVID-19 Infections. *Biochemistry research international*. 2021;2021.
424. Rahman O, Trigonis RA, Craft MK, Kruer RM, Miller EM, Terry CL, et al. Corticosteroid Use in Severely Hypoxemic COVID-19 Patients: An observational cohort analysis of dosing patterns and outcomes in the early phase of the pandemic. *Medrxiv*. 2020.

**Comparative-effectiveness research of COVID-19 treatment: A rapid scoping review**

425. Rahmani H, Davoudi-Monfared E, Nourian A, Khalili H, Hajizadeh N, Jalalabadi NZ, et al. Interferon  $\beta$ -1b in treatment of severe COVID-19: a randomized clinical trial. *International immunopharmacology*. 2020;88:106903.
426. Rainwater-Lovett K, Redd JT, Stewart MA, Calles NE, Cuff T, Fang M, et al. Real-world Effect of Monoclonal Antibody Treatment in COVID-19 Patients in a Diverse Population in the United States. *medRxiv*. 2021.
427. Rajendram P, Sacha GL, Mehkri O, Wang X, Han X, Vachharajani V, et al. Tocilizumab in coronavirus disease 2019-related critical illness: a propensity matched analysis. *Critical care explorations*. 2021;3(1).
428. Rajter JC, Sherman MS, Fattah N, Vogel F, Sacks J, Rajter J-J. Use of ivermectin is associated with lower mortality in hospitalized patients with coronavirus disease 2019: the ivermectin in COVID nineteen study. *Chest*. 2021;159(1):85-92.
429. Ramakrishnan S, Nicolau DV, Langford B, Mahdi M, Jeffers H, Mwasuku C, et al. Inhaled budesonide in the treatment of early COVID-19 illness: a randomised controlled trial. 2021.
430. Ramakrishnan S, Nicolau Jr DV, Langford B, Mahdi M, Jeffers H, Mwasuku C, et al. Inhaled budesonide in the treatment of early COVID-19 (STOIC): a phase 2, open-label, randomised controlled trial. *The Lancet Respiratory Medicine*. 2021.
431. Raman R, Bhagwan Barge V, Anil Kumar D, Dandu H, Rakesh Kartha R, Bafna V, et al. A Phase II Safety and Efficacy Study on Prognosis of Moderate Pneumonia in Coronavirus Disease 2019 Patients With Regular Intravenous Immunoglobulin Therapy. *The Journal of Infectious Diseases*. 2021;223(9):1538-43.
432. Ramireddy A, Chugh H, Reinier K, Ebinger J, Park E, Thompson M, et al. Experience with hydroxychloroquine and azithromycin in the coronavirus disease 2019 pandemic: implications for QT interval monitoring. *Journal of the American Heart Association*. 2020;9(12):e017144.
433. Ramiro S, Mostard RL, Magro-Checa C, Van Dongen CM, Dormans T, Buijs J, et al. Historically controlled comparison of glucocorticoids with or without tocilizumab versus supportive care only in patients with COVID-19-associated cytokine storm syndrome: results of the CHIC study. *Annals of the rheumatic diseases*. 2020;79(9):1143-51.
434. Rana MA, Hashmi M, Qayyum A, Pervaiz R, Saleem M, Munir MF, et al. Comparison of efficacy of dexamethasone and methylprednisolone in improving PaO<sub>2</sub>/FiO<sub>2</sub> ratio among COVID-19 patients. *Cureus*. 2020;12(10).
435. Rangel LK, Shah P, Sicco KL, Caplan AS, Femia A. Chronic hydroxychloroquine therapy and COVID-19 outcomes: A retrospective case-control analysis. *Journal of the American Academy of Dermatology*. 2021;84(6):1769-72.
436. Ranjbar K, Moghadami M, Mirahmadizadeh A, Fallahi MJ, Khaloo V, Shahriarirad R, et al. Methylprednisolone or dexamethasone, which one is superior corticosteroid in the treatment of hospitalized COVID-19 patients: a triple-blinded randomized controlled trial. *BMC infectious diseases*. 2021;21(1):1-8.
437. Rashad A, Mousa S, Nafady-Hego H, Nafady A, Elgendy H. Short term survival of critically ill COVID-19 Egyptian patients on assisted ventilation treated by either Dexamethasone or Tocilizumab. *Scientific Reports*. 2021;11(1):1-7.
438. Rasheed AM, Fatak DF, Hashim HA, Maulood MF, Kabah KK, Abdulamir AS. The therapeutic potential of convalescent plasma therapy on treating critically-ill COVID-

**Comparative-effectiveness research of COVID-19 treatment: A rapid scoping review**

- 19 patients residing in respiratory care units in hospitals in Baghdad, Iraq. medRxiv. 2020.
439. Rashid RA, Zgair A, Al-Ani RM. Effect of nasal corticosteroid in the treatment of anosmia due to COVID-19: A randomised double-blind placebo-controlled study. *American Journal of Otolaryngology*. 2021;42(5):103033.
440. Rastogi A, Bhansali A, Khare N, Suri V, Yaddanapudi N, Sachdeva N, et al. Short term, high-dose vitamin D supplementation for COVID-19 disease: a randomised, placebo-controlled, study (SHADE study). *Postgraduate medical journal*. 2020.
441. Réa-Neto Á, Bernardelli RS, Câmara BMD, Reese FB, Queiroga MVO, Oliveira MC. An open-label randomized controlled trial evaluating the efficacy of chloroquine/hydroxychloroquine in severe COVID-19 patients. *Scientific reports*. 2021;11(1):1-10.
442. Reis G, Silva EAdSM, Silva DCM, Thabane L, Singh G, Park JJ, et al. Effect of Early Treatment With Hydroxychloroquine or Lopinavir and Ritonavir on Risk of Hospitalization Among Patients With COVID-19: The TOGETHER Randomized Clinical Trial. *JAMA network open*. 2021;4(4):e216468-e.
443. Ren L, Xu W, Overton JL, Yu S, Chiamvimonvat N, Thai PN. Assessment of Hydroxychloroquine and Chloroquine Safety Profiles-A Systematic Review and Meta-Analysis. *MedRxiv*. 2020.
444. Rentsch CT, Beckman JA, Tomlinson L, Gellad WF, Alcorn C, Kidwai-Khan F, et al. Early initiation of prophylactic anticoagulation for prevention of coronavirus disease 2019 mortality in patients admitted to hospital in the United States: cohort study. *BMJ*. 2021;372.
445. Rocco PR, Silva PL, Cruz FF, Melo-Junior MAC, Tierno PF, Moura MA, et al. Early use of nitazoxanide in mild Covid-19 disease: randomised, placebo-controlled trial. *European Respiratory Journal*. 2021;58(1).
446. Rodríguez-Baño J, Pachón J, Carratalà J, Ryan P, Jarrín I, Yllescas M, et al. Treatment with tocilizumab or corticosteroids for COVID-19 patients with hyperinflammatory state: a multicentre cohort study (SAM-COVID-19). *Clinical Microbiology and Infection*. 2021;27(2):244-52.
447. Rodríguez-García JL, Sanchez-Nievas G, Arevalo-Serrano J, Garcia-Gomez C, Jimenez-Vizueté JM, Martínez-Alfaro E. Baricitinib improves respiratory function in patients treated with corticosteroids for SARS-CoV-2 pneumonia: an observational cohort study. *Rheumatology*. 2021;60(1):399-407.
448. Rodríguez-Molinero A, Pérez-López C, Gálvez-Barrón C, Miñarro A, Gullello EAR, Pérez IC, et al. Association between high-dose steroid therapy, respiratory function, and time to discharge in patients with COVID-19: Cohort study. *Medicina Clínica (English Edition)*. 2021;156(1):7-12.
449. Rodríguez-Molinero A, Pérez-López C, Gálvez-Barrón C, Miñarro A, Macho O, López GF, et al. Observational study of azithromycin in hospitalized patients with COVID-19. *PloS one*. 2020;15(9):e0238681.
450. Rodríguez-Molinero A, Pérez-López C, Gálvez-Barrón C, Miñarro A, Macho O, López GF, et al. Matched cohort study on the efficacy of tocilizumab in patients with COVID-19. *One Health*. 2021;12:100214.

**Comparative-effectiveness research of COVID-19 treatment: A rapid scoping review**

451. Rogers R, Shehadeh F, Mylona EK, Rich J, Neill M, Touzard-Romo F, et al. Convalescent Plasma for Patients With Severe Coronavirus Disease 2019 (COVID-19): A Matched Cohort Study. *Clinical Infectious Diseases*. 2021;73(1):e208-e14.
452. Rojas-Marte G, Khalid M, Mukhtar O, Hashmi AT, Waheed MA, Ehrlich S, et al. Outcomes in patients with severe COVID-19 disease treated with tocilizumab: a case–controlled study. *QJM: An International Journal of Medicine*. 2020;113(8):546-50.
453. Roomi S, Ullah W, Ahmed F, Farooq S, Sadiq U, Chohan A, et al. Efficacy of hydroxychloroquine and tocilizumab in patients with COVID-19: single-center retrospective chart review. *Journal of medical Internet research*. 2020;22(9):e21758.
454. Roozbeh F, Saeedi M, Alizadeh-Navaei R, Hedayatizadeh-Omran A, Merat S, Wentzel H, et al. Sofosbuvir and daclatasvir for the treatment of COVID-19 outpatients: a double-blind, randomized controlled trial. *Journal of Antimicrobial Chemotherapy*. 2021;76(3):753-7.
455. Rosas IO, Bräu N, Waters M, Go RC, Hunter BD, Bhagani S, et al. Tocilizumab in hospitalized patients with severe Covid-19 pneumonia. *New England Journal of Medicine*. 2021;384(16):1503-16.
456. Rosas J, Liaño FP, Cantó ML, Barea JMC, Beser AR, Rabasa JTA, et al. Experience with the use of Baricitinib and tocilizumab monotherapy or combined, in patients with interstitial pneumonia secondary to coronavirus COVID19: a real-world study. *Reumatología clinica*. 2020.
457. Rosenberg ES, Dufort EM, Udo T, Wilberschied LA, Kumar J, Tesoriero J, et al. Association of treatment with hydroxychloroquine or azithromycin with in-hospital mortality in patients with COVID-19 in New York State. *Jama*. 2020;323(24):2493-502.
458. Rossi B, Nguyen LS, Zimmermann P, Boucenna F, Dubret L, Baucher L, et al. Effect of tocilizumab in hospitalized patients with severe COVID-19 pneumonia: a case-control cohort study. *Pharmaceuticals*. 2020;13(10):317.
459. Rossotti R, Travi G, Ughi N, Corradin M, Baignera C, Fumagalli R, et al. Safety and efficacy of anti-il6-receptor tocilizumab use in severe and critical patients affected by coronavirus disease 2019: a comparative analysis. *Journal of Infection*. 2020;81(4):e11-e7.
460. Roumier M, Paule R, Vallée A, Rohmer J, Ballester M, Brun A-L, et al. Tocilizumab for severe worsening COVID-19 pneumonia: a propensity score analysis. *Journal of clinical immunology*. 2021;41(2):303-14.
461. Roy R, Pattadar C, Raj R, Agarwal N, Biswas B, Majhi PK, et al. Ivermectin as a potential treatment for mild to moderate COVID-19—a double blind randomized placebo-controlled trial. *MedRxiv*. 2021.
462. Roy-Vallejo E, Purificacion AS, Pena JDT, Moreno BS, Arnalich F, Blanco MJG, et al. Effect of in-hospital treatment with angiotensin-converting enzyme inhibitors and angiotensin II receptor blockers on mortality and complications in patients hospitalized for COVID-19: a large Spanish cohort study. *medRxiv*. 2021.
463. Ruan X, Lu X, Wang K, Zhang B, Wang J, Li Y, et al. Liver injury after antiviral treatment of critically ill patients with COVID-19: a single-centered retrospective cohort study. *Ann Palliat Med*. 2021:2429-38.

**Comparative-effectiveness research of COVID-19 treatment: A rapid scoping review**

464. Ruiz-Antorán B, Sancho-López A, Torres F, Moreno-Torres V, de Pablo-López I, García-López P, et al. Combination of tocilizumab and steroids to improve mortality in patients with severe COVID-19 infection: a Spanish, multicenter, cohort study. *Infectious diseases and therapy*. 2021;10(1):347-62.
465. Ruiz-Irastorza G, Pijoan J-I, Bereciartua E, Dunder S, Dominguez J, Garcia-Escudero P, et al. Second week methyl-prednisolone pulses improve prognosis in patients with severe coronavirus disease 2019 pneumonia: An observational comparative study using routine care data. *PloS one*. 2020;15(9):e0239401.
466. Russo V, Bottino R, D'Andrea A, Silverio A, Di Maio M, Golino P, et al. Chronic Oral Anticoagulation and Clinical Outcome in Hospitalized COVID-19 Patients. *Cardiovascular drugs and therapy*. 2021:1-8.
467. Russo V, Cardillo G, Viggiano GV, Mangiacapra S, Cavalli A, Fontanella A, et al. Fondaparinux use in patients with COVID-19: a preliminary multicenter real-world experience. *Journal of Cardiovascular Pharmacology*. 2020;76(4):369-71.
468. Sadeghi A, Ali Asgari A, Norouzi A, Kheiri Z, Anushirvani A, Montazeri M, et al. Sofosbuvir and daclatasvir compared with standard of care in the treatment of patients admitted to hospital with moderate or severe coronavirus infection (COVID-19): a randomized controlled trial. *Journal of Antimicrobial Chemotherapy*. 2020;75(11):3379-85.
469. Saggi SJ, Nath S, Culas R, Chittalae S, Burza A, Srinivasan M, et al. Early Experience With Methylprednisolone on SARS-CoV-2 Infection in the African American Population, a Retrospective Analysis. *Clinical Medicine Insights: Circulatory, Respiratory and Pulmonary Medicine*. 2020;14:1179548420980699.
470. Sakoulas G, Geriak M, Kullar R, Greenwood K, Habib M, Vyas A, et al. Intravenous Immunoglobulin (IVIG) significantly reduces respiratory morbidity in COVID-19 pneumonia: a prospective randomized trial. *medRxiv*. 2020.
471. Sakoulas G, Geriak M, Kullar R, Greenwood KL, Habib M, Vyas A, et al. Intravenous immunoglobulin plus methylprednisolone mitigate respiratory morbidity in coronavirus disease 2019. *Critical care explorations*. 2020;2(11).
472. Salama C, Han J, Yau L, Reiss WG, Kramer B, Neidhart JD, et al. Tocilizumab in patients hospitalized with Covid-19 pneumonia. *New England Journal of Medicine*. 2021;384(1):20-30.
473. Salazar E, Christensen PA, Graviss EA, Nguyen DT, Castillo B, Chen J, et al. Treatment of coronavirus disease 2019 patients with convalescent plasma reveals a signal of significantly decreased mortality. *The American journal of pathology*. 2020;190(11):2290-303.
474. Salazar MR, González SE, Regairaz L, Ferrando NS, González Martínez VV, Carrera Ramos PM, et al. Risk factors for COVID-19 mortality: The effect of convalescent plasma administration. *Plos one*. 2021;16(4):e0250386.
475. Saleemi SA, Alrajhi A, Alhajji M, Alfattani A, Albaiz F. Time to negative PCR from symptom onset in COVID-19 patients on Hydroxychloroquine and Azithromycin-A real world experience. *MedRxiv*. 2020.
476. Saleh M, Gabriels J, Chang D, Soo Kim B, Mansoor A, Mahmood E, et al. Effect of chloroquine, hydroxychloroquine, and azithromycin on the corrected QT interval in patients with SARS-CoV-2 infection. *Circulation: Arrhythmia and Electrophysiology*. 2020;13(6):e008662.

**Comparative-effectiveness research of COVID-19 treatment: A rapid scoping review**

477. Salton F, Confalonieri P, Meduri GU, Santus P, Harari S, Scala R, et al., editors. Prolonged low-dose methylprednisolone in patients with severe COVID-19 pneumonia. *Open forum infectious diseases*; 2020: Oxford University Press US.
478. Salvarani C, Dolci G, Massari M, Merlo DF, Cavuto S, Savoldi L, et al. Effect of tocilizumab vs standard care on clinical worsening in patients hospitalized with COVID-19 pneumonia: a randomized clinical trial. *JAMA internal medicine*. 2021;181(1):24-31.
479. Salvati L, Occhipinti M, Gori L, Ciani L, Mazzoni A, Maggi L, et al. Pulmonary vascular improvement in severe COVID-19 patients treated with tocilizumab. *Immunology Letters*. 2020;228:122-8.
480. Sammartino D, Jafri F, Cook B, La L, Kim H, Cardasis J, et al. Predictors for inpatient mortality during the first wave of the SARS-CoV-2 pandemic: A retrospective analysis. *PloS one*. 2021;16(5):e0251262.
481. Sandhu T, Tieng A, Chilimuri S, Franchin G. A case control study to evaluate the impact of colchicine on patients admitted to the hospital with moderate to severe COVID-19 infection. *Canadian Journal of Infectious Diseases and Medical Microbiology*. 2020;2020.
482. Sands K, Wenzel R, McLean L, Korwek K, Roach J, Miller K, et al. No clinical benefit in mortality associated with hydroxychloroquine treatment in patients with COVID-19. *International Journal of Infectious Diseases*. 2021;104:34-40.
483. Santoro F, Núñez-Gil IJ, Viana-Llamas MC, Maroun Eid C, Romero R, Fernández Rozas I, et al. Anticoagulation Therapy in Patients With Coronavirus Disease 2019: Results From a Multicenter International Prospective Registry (Health Outcome Predictive Evaluation for Corona Virus Disease 2019 [HOPE-COVID19]). *Critical Care Medicine*. 2021;49(6):e624-e33.
484. Sarayani A, Cicali B, Henriksen CH, Brown JD. Safety signals for QT prolongation or Torsades de Pointes associated with azithromycin with or without chloroquine or hydroxychloroquine. *Research in Social and Administrative Pharmacy*. 2021;17(2):483-6.
485. Sayed AM, Khalaf AM, Abdelrahim ME, Elgendy MO. Repurposing of some anti-infective drugs for COVID- 19 treatment: A surveillance study supported by an in silico investigation. *International Journal of Clinical Practice*. 2021;75(4):e13877.
486. Sbidian E, Josse J, Lemaitre G, Mayer I, Bernaux M, Gramfort A, et al. Hydroxychloroquine with or without azithromycin and in-hospital mortality or discharge in patients hospitalized for COVID-19 infection: a cohort study of 4,642 in-patients in France. *MedRxiv*. 2020.
487. Scarsi M, Piantoni S, Colombo E, Airó P, Richini D, Miclini M, et al. Association between treatment with colchicine and improved survival in a single-centre cohort of adult hospitalised patients with COVID-19 pneumonia and acute respiratory distress syndrome. *Annals of the rheumatic diseases*. 2020;79(10):1286-9.
488. Schneider J, Jaenigen B, Wagner D, Rieg S, Hornuss D, Bieber PM, et al. Therapy with lopinavir/ritonavir and hydroxychloroquine is associated with acute kidney injury in COVID-19 patients. *Plos one*. 2021;16(5):e0249760.
489. Schooling C, Yeung SA, Kwok M, Zhao J. Genetic validation of the use of tocilizumab, statins and dexamethasone in COVID-19. *medRxiv*. 2020.

**Comparative-effectiveness research of COVID-19 treatment: A rapid scoping review**

490. Sekhavati E, Jafari F, SeyedAlinaghi S, Jamalimoghadamsiahkali S, Sadr S, Tabarestani M, et al. Safety and effectiveness of azithromycin in patients with COVID-19: an open-label randomised trial. *International journal of antimicrobial agents*. 2020;56(4):106143.
491. Self WH, Semler MW, Leither LM, Casey JD, Angus DC, Brower RG, et al. Effect of hydroxychloroquine on clinical status at 14 days in hospitalized patients with COVID-19: a randomized clinical trial. *Jama*. 2020;324(21):2165-76.
492. Sevilla-Castillo F, Roque-Reyes OJ, Romero-Lechuga F, Gómez-Núñez MF, Castillo-López M, Medina-Santos D, et al. Both Chloroquine and Lopinavir/Ritonavir Are Ineffective for COVID-19 Treatment and Combined Worsen the Pathology: A Single-Center Experience with Severely Ill Patients. *BioMed Research International*. 2021;2021.
493. Seyhan AU, Doganay F, Yilmaz E, Topal NP, Ak R. Investigation of QT prolongation with hydroxychloroquine and azithromycin for the treatment of COVID-19. *Journal of the College of Physicians and Surgeons Pakistan*. 2020;30(10S1):S153-S.
494. Shao Z, Feng Y, Zhong L, Xie Q, Lei M, Liu Z, et al. Clinical efficacy of intravenous immunoglobulin therapy in critical ill patients with COVID-19: a multicenter retrospective cohort study. *Clinical & translational immunology*. 2020;9(10):e1192.
495. Shen L, Qiu L, Liu D, Wang L, Huang H, Ge H, et al. The association of low molecular weight heparin use and in-hospital mortality among patients hospitalized with COVID-19. *Cardiovascular Drugs and Therapy*. 2021:1-8.
496. Shenoy AG, Hettinger AZ, Fernandez SJ, Blumenthal J, Baez V. Early mortality benefit with COVID-19 convalescent plasma: a matched control study. *British journal of haematology*. 2021;192(4):706-13.
497. Shi C, Wang C, Wang H, Yang C, Cai F, Zeng F, et al. The potential of low molecular weight heparin to mitigate cytokine storm in severe COVID-19 patients: a retrospective cohort study. *Clinical and translational science*. 2020;13(6):1087-95.
498. Shi L, Huang H, Lu X, Yan X, Jiang X, Xu R, et al. Effect of human umbilical cord-derived mesenchymal stem cells on lung damage in severe COVID-19 patients: a randomized, double-blind, placebo-controlled phase 2 trial. *Signal transduction and targeted therapy*. 2021;6(1):1-9.
499. Shi L, Huang H, Lu X, Yan X, Jiang X, Xu R, et al. Effect of human umbilical cord-derived mesenchymal stem cells on lung damage in severe COVID-19 patients: a randomized, double-blind, placebo-controlled phase 2 trial. *Signal transduction and targeted therapy*. 2021;6(1):1-9.
500. Shoaibi A, Fortin SP, Weinstein R, Berlin JA, Ryan P. Comparative effectiveness of famotidine in hospitalized COVID-19 patients. *Official journal of the American College of Gastroenterology | ACG*. 2021;116(4):692-9.
501. Shu L, Niu C, Li R, Huang T, Wang Y, Huang M, et al. Treatment of severe COVID-19 with human umbilical cord mesenchymal stem cells. *Stem cell research & therapy*. 2020;11(1):1-11.
502. Siami Z, Aghajanian S, Mansouri S, Mokhames Z, Pakzad R, Kabir K, et al. Effect of Ammonium Chloride in addition to standard of care in outpatients and hospitalized COVID-19 patients: a randomized clinical trial. *International Journal of Infectious Diseases*. 2021;108:306-8.

**Comparative-effectiveness research of COVID-19 treatment: A rapid scoping review**

503. Silva M, Espejo A, Pereyra ML, Lynch M, Thompson M, Taconelli H, et al. Efficacy of Nitazoxanide in reducing the viral load in COVID-19 patients. Randomized, placebo-controlled, single-blinded, parallel group, pilot study. medRxiv. 2021.
504. Simonovich VA, Burgos Prats LD, Scibona P, Beruto MV, Vallone MG, Vázquez C, et al. A randomized trial of convalescent plasma in Covid-19 severe pneumonia. *New England Journal of Medicine*. 2021;384(7):619-29.
505. Singh AK, Singh A, Singh R, Misra A. Remdesivir in COVID-19: a critical review of pharmacology, pre-clinical and clinical studies. *Diabetes & Metabolic Syndrome: Clinical Research & Reviews*. 2020;14(4):641-8.
506. Singh S, John T, Kumar P, Quadery SR. The impact of high dose oral cotrimoxazole in patients with COVID-19 with hypoxic respiratory failure requiring non-invasive ventilation: A Case Control Study. medRxiv. 2021.
507. Singh S, Khan A, Chowdhry M, Chatterjee A. Outcomes of hydroxychloroquine treatment among hospitalized COVID-19 patients in the United States-real-world evidence from a federated electronic medical record network. MedRxiv. 2020.
508. Sinha P, Jafarzadeh SR, Assoumou SA, Bielick CG, Carpenter B, Garg S, et al. The effect of IL-6 inhibitors on mortality among hospitalized COVID-19 patients: a multicenter study. *The Journal of infectious diseases*. 2021;223(4):581-8.
509. Sinha P, Mostaghim A, Bielick CG, McLaughlin A, Hamer DH, Wetzler LM, et al. Early administration of interleukin-6 inhibitors for patients with severe COVID-19 disease is associated with decreased intubation, reduced mortality, and increased discharge. *International Journal of Infectious Diseases*. 2020;99:28-33.
510. Sinkeler F, Berger F, Muntinga H, Jansen M. The risk of QTc-interval prolongation in COVID-19 patients treated with chloroquine. *Netherlands Heart Journal*. 2020;28(7):418-23.
511. Sivaloganathan H, Ladikou EE, Chevassut T. COVID- 19 mortality in patients on anticoagulants and antiplatelet agents. *British journal of haematology*. 2020.
512. Sivapalasingam S, Lederer D, Bhore R, Hajizadeh N, Criner G, Hossain R, et al. A Randomized Placebo-Controlled Trial of Sarilumab in Hospitalized Patients with Covid-19. medRxiv. 2021.
513. Skipper CP, Pastick KA, Engen NW, Bangdiwala AS, Abassi M, Lofgren SM, et al. Hydroxychloroquine in nonhospitalized adults with early COVID-19: a randomized trial. *Annals of internal medicine*. 2020;173(8):623-31.
514. Soin AS, Kumar K, Choudhary NS, Sharma P, Mehta Y, Kataria S, et al. Tocilizumab plus standard care versus standard care in patients in India with moderate to severe COVID-19-associated cytokine release syndrome (COVINTOC): an open-label, multicentre, randomised, controlled, phase 3 trial. *The Lancet Respiratory Medicine*. 2021;9(5):511-21.
515. Solaymani-Dodaran M, Ghanei M, Bagheri M, Qazvini A, Vahedi E, Saadat SH, et al. Safety and efficacy of Favipiravir in moderate to severe SARS-CoV-2 pneumonia. *International Immunopharmacology*. 2021;95:107522.
516. Somers EC, Eschenauer GA, Troost JP, Golob JL, Gandhi TN, Wang L, et al. Tocilizumab for treatment of mechanically ventilated patients with COVID-19. *Clinical Infectious Diseases*. 2021;73(2):e445-e54.



**Comparative-effectiveness research of COVID-19 treatment: A rapid scoping review**

517. Sostin OV, Rajapakse P, Cruser B, Wakefield D, Cruser D, Petrini J. A matched cohort study of convalescent plasma therapy for COVID- 19. *Journal of clinical apheresis*. 2021.
518. Soto-Becerra P, Culquichicón C, Hurtado-Roca Y, Araujo-Castillo RV. Real-world effectiveness of hydroxychloroquine, azithromycin, and ivermectin among hospitalized COVID-19 patients: results of a target trial emulation using observational data from a nationwide healthcare system in Peru. *Azithromycin, and Ivermectin Among Hospitalized COVID-19 Patients: Results of a Target Trial Emulation Using Observational Data from a Nationwide Healthcare System in Peru*. 2020.
519. Spagnuolo V, Guffanti M, Galli L, Poli A, Querini PR, Ripa M, et al. Viral clearance after early corticosteroid treatment in patients with moderate or severe covid-19. *Scientific Reports*. 2020;10(1):1-7.
520. Spinner CD, Gottlieb RL, Criner GJ, López JRA, Cattelan AM, Viladomiu AS, et al. Effect of remdesivir vs standard care on clinical status at 11 days in patients with moderate COVID-19: a randomized clinical trial. *Jama*. 2020;324(11):1048-57.
521. Spinner CD, Gottlieb RL, Criner GJ, López JRA, Cattelan AM, Viladomiu AS, et al. Effect of remdesivir vs standard care on clinical status at 11 days in patients with moderate COVID-19: a randomized clinical trial. *Jama*. 2020;324(11):1048-57.
522. Stanevich OV, Fomina DS, Bakulin IG, Galeev SI, Bakin EA, Belash VA, et al. Ruxolitinib Versus Dexamethasone in Hospitalized Adults With COVID-19: Multicenter Matched Cohort Study. 2021.
523. Stewart M, Rodriguez-Watson C, Albayrak A, Asubonteng J, Belli A, Brown T, et al. COVID-19 Evidence Accelerator: A parallel analysis to describe the use of Hydroxychloroquine with or without Azithromycin among hospitalized COVID-19 patients. *Plos one*. 2021;16(3):e0248128.
524. Stone JH, Frigault MJ, Serling-Boyd NJ, Fernandes AD, Harvey L, Foulkes AS, et al. Efficacy of tocilizumab in patients hospitalized with Covid-19. *New England Journal of Medicine*. 2020;383(24):2333-44.
525. Strohhahn GW, Heiss BL, Rouhani SJ, Trujillo JA, Yu J, Kacew AJ, et al. COVIDOSE: Low-dose tocilizumab in the treatment of Covid-19. *medRxiv*. 2020.
526. Sturek JM, Thomas TA, Gorham JD, Sheppard CA, Raymond AE, De Guex KP, et al. Convalescent plasma for preventing critical illness in COVID-19: A phase 2 trial and immune profile. *medRxiv*. 2021.
527. Su Y, Ling Y, Ma Y, Tao L, Miao Q, Shi Q, et al. Efficacy of early hydroxychloroquine treatment in preventing COVID-19 pneumonia aggravation, the experience from Shanghai, China. *Bioscience trends*. 2020;14(6):408-14.
528. Sulaiman T, Mohana A, Alawdah L, Mahmoud N, Hassanein M, Wani T, et al. The effect of early hydroxychloroquine-based therapy in COVID-19 patients in ambulatory care settings: a nationwide prospective cohort study. *medRxiv*. 2020.
529. Sun Q, Xie J, Zheng R, Li X, Chen H, Tong Z, et al. The effect of thymosin  $\alpha$ 1 on mortality of critical COVID-19 patients: A multicenter retrospective study. *International Immunopharmacology*. 2021;90:107143.
530. Tabarsi P, Barati S, Jamaati H, Haseli S, Marjani M, Moniri A, et al. Evaluating the effects of intravenous immunoglobulin (IVIg) on the management of severe COVID-

**Comparative-effectiveness research of COVID-19 treatment: A rapid scoping review**

- 19 cases: a randomized controlled trial. *International immunopharmacology*. 2021;90:107205.
531. Taccone FS, Gevenois PA, Peluso L, Pletchette Z, Lheureux O, Brasseur A, et al. Higher intensity thromboprophylaxis regimens and pulmonary embolism in critically ill coronavirus disease 2019 patients. *Critical care medicine*. 2020.
532. Tacquard C, Mansour A, Godon A, Godet J, Poissy J, Garrigue D, et al. Impact of high-dose prophylactic anticoagulation in critically ill patients with coronavirus disease 2019 pneumonia. *Chest*. 2021.
533. Tan CW, Ho LP, Kalimuddin S, Cherg BPZ, Teh YE, Thien SY, Wong HM, Tern PJW, Chandran M, Chay JWM, Nagarajan C, Sultana R, Low JGH, Ng HJ. Cohort study to evaluate the effect of vitamin D, magnesium, and vitamin B12 in combination on progression to severe outcomes in older patients with coronavirus (COVID-19). *Nutrition*. 2020;79-80:111017.
534. Tang W, Cao Z, Han M, Wang Z, Chen J, Sun W, et al. Hydroxychloroquine in patients with mainly mild to moderate coronavirus disease 2019: open label, randomised controlled trial. *bmj*. 2020;369.
535. Tang X, Feng Y-M, Ni J-X, Zhang J-Y, Liu L-M, Hu K, et al. Early use of corticosteroid may prolong SARS-CoV-2 shedding in non-intensive care unit patients with COVID-19 pneumonia: a multicenter, single-blind, randomized control trial. *Respiration*. 2021;100(2):116-26.
536. Temesgen Z, Assi M, Shweta F, Vergidis P, Rizza SA, Bauer PR, et al., editors. GM-CSF neutralization with lenzilumab in severe COVID-19 pneumonia: a case-cohort study. *Mayo Clinic Proceedings*; 2020: Elsevier.
537. Temesgen Z, Burger CD, Baker J, Polk C, Libertin C, Kelley C, et al. Lenzilumab Efficacy And Safety In Newly Hospitalized Covid-19 Subjects: Results From The Live-Air Phase 3 Randomized Double-Blind Placebo-Controlled Trial. *medRxiv*. 2021.
538. Thakar A, Panda S, Sakthivel P, Brijwal M, Dhakad S, Choudekar A, et al. Chloroquine nasal drops in asymptomatic & mild COVID-19: An exploratory randomized clinical trial. *The Indian journal of medical research*. 2021;153(1-2):151.
539. Tharaux P-L, Pialoux G, Pavot A, Mariette X, Hermine O, Resche-Rigon M, et al. Effect of anakinra versus usual care in adults in hospital with COVID-19 and mild-to-moderate pneumonia (CORIMUNO-ANA-1): a randomised controlled trial. *The Lancet Respiratory Medicine*. 2021;9(3):295-304.
540. Thomas S, Patel D, Bittel B, Wolski K, Wang Q, Kumar A, et al. Effect of high-dose zinc and ascorbic acid supplementation vs usual care on symptom length and reduction among ambulatory patients with SARS-CoV-2 infection: the COVID A to Z randomized clinical trial. *JAMA network open*. 2021;4(2):e210369-e.
541. Thomas S, Patel D, Bittel B, Wolski K, Wang Q, Kumar A, et al. Effect of high-dose zinc and ascorbic acid supplementation vs usual care on symptom length and reduction among ambulatory patients with SARS-CoV-2 infection: the COVID A to Z randomized clinical trial. *JAMA network open*. 2021;4(2):e210369-e.
542. Thompson MA, Henderson JP, Shah PK, Rubinstein SM, Joyner MJ, Choueiri TK, et al. Convalescent plasma and improved survival in patients with hematologic malignancies and COVID-19. *medRxiv*. 2021.

**Comparative-effectiveness research of COVID-19 treatment: A rapid scoping review**

543. Tian J, Zhang M, Jin M, Zhang F, Chu Q, Wang X, et al. Repurposed tocilizumab in patients with severe COVID-19. *The Journal of Immunology*. 2021;206(3):599-606.
544. Tolouian R, Mulla ZD, Jamaati H, Babamahmoodi A, Marjani M, Eskandari R, et al. Effect of bromhexine in hospitalized patients with COVID-19. *Journal of Investigative Medicine*. 2021.
545. Tomazini BM, Maia IS, Cavalcanti AB, Berwanger O, Rosa RG, Veiga VC, et al. Effect of dexamethasone on days alive and ventilator-free in patients with moderate or severe acute respiratory distress syndrome and COVID-19: the CoDEX randomized clinical trial. *Jama*. 2020;324(13):1307-16.
546. Tong S, Su Y, Yu Y, Wu C, Chen J, Wang S, et al. Ribavirin therapy for severe COVID-19: a retrospective cohort study. *International journal of antimicrobial agents*. 2020;56(3):106114.
547. Tortajada C, Colomer E, Andreu- Ballester JC, Esparcia A, Oltra C, Flores J. Corticosteroids for COVID- 19 patients requiring oxygen support? Yes, but not for everyone: Effect of corticosteroids on mortality and intensive care unit admission in patients with COVID- 19 according to patients' oxygen requirements. *Journal of Medical Virology*. 2021;93(3):1817-23.
548. Touafchia A, Bagheri H, Carrié D, Durrieu G, Sommet A, Chouchana L, et al. Serious bradycardia and remdesivir for coronavirus 2019 (COVID-19): a new safety concerns. *Clinical Microbiology and Infection*. 2021;27(5):791. e5-. e8.
549. Tran V-T, Mahévas M, Bani-Sadr F, Robineau O, Perpoint T, Perrodeau E, et al. Corticosteroids in patients hospitalized for COVID-19 pneumonia who require oxygen: observational comparative study using routine care data. *Clinical Microbiology and Infection*. 2021;27(4):603-10.
550. Tran V-T, Mahevas M, Sadr FB, Robineau O, Perpoint T, Perrodeau E, et al. Association between corticosteroids and intubation or death among patients with COVID-19 pneumonia in non-ICU settings: an observational study using of real-world data from 51 hospitals in France and Luxembourg. *medRxiv*. 2020.
551. Trinh M, Chang DR, Govindarajulu US, Kane E, Fuster V, Kohli-Seth R, et al. Therapeutic anticoagulation is associated with decreased mortality in mechanically ventilated COVID-19 patients. *medRxiv*. 2020.
552. Tsai A, Diawara O, Nahass RG, Brunetti L. Impact of tocilizumab administration on mortality in severe COVID-19. *Scientific reports*. 2020;10(1):1-7.
553. Tsiakos K, Tsakiris A, Tsibris G, Voutsinas P, Panagopoulos P, Kosmidou M, et al. Oral clarithromycin in COVID-19 of moderate severity: the ACHIEVE open-label trial using concurrent matched comparators. *medRxiv*. 2020.
554. Tworek A, Jaroń K, Uszyńska-Kaluża B, Rydzewski A, Gil R, Deptała A, et al. Convalescent plasma treatment is associated with lower mortality and better outcomes in high-risk COVID-19 patients—propensity-score matched case-control study. *International Journal of Infectious Diseases*. 2021;105:209-15.
555. Udwadia ZF, Singh P, Barkate H, Patil S, Rangwala S, Pendse A, et al. Efficacy and safety of favipiravir, an oral RNA-dependent RNA polymerase inhibitor, in mild-to-moderate COVID-19: A randomized, comparative, open-label, multicenter, phase 3 clinical trial. *International Journal of Infectious Diseases*. 2021;103:62-71.
556. Ulrich RJ, Troxel AB, Carmody E, Eapen J, Bäcker M, DeHovitz JA, et al., editors. Treating COVID-19 with hydroxychloroquine (TEACH): a multicenter, double-blind

**Comparative-effectiveness research of COVID-19 treatment: A rapid scoping review**

- randomized controlled trial in hospitalized patients. *Open forum infectious diseases*; 2020: Oxford University Press US.
557. Vahedi E, Ghanei M, Ghazvini A, Azadi H, Izadi M, Panahi Y, et al. The clinical value of two combination regimens in the Management of Patients Suffering from Covid-19 pneumonia: a single centered, retrospective, observational study. *DARU Journal of Pharmaceutical Sciences*. 2020;28(2):507-16.
558. Vaira LA, Hopkins C, Petrocelli M, Lechien JR, Cutrupi S, Salzano G, et al. Efficacy of corticosteroid therapy in the treatment of long-lasting olfactory disorders in COVID-19 patients. *Rhinology*. 2020.
559. Valerio Pascua F, Diaz O, Medina R, Contreras B, Mistroff J, Espinosa D, et al. A multi-mechanism approach reduces length of stay in the ICU for severe COVID-19 patients. *PloS one*. 2021;16(1):e0245025.
560. Van den Eynde E, Gasch O, Oliva J, Prieto E, Calzado S, Gomila A, et al. Corticosteroids and tocilizumab reduce in-hospital mortality in severe COVID-19 pneumonia: a retrospective study in a Spanish hospital. *Infectious Diseases*. 2021;53(4):291-302.
561. Vasylyeva O, Chen T, Hanna J. Remdesivir for COVID-19: match-population analysis with compassionate use of Remdesivir for severe COVID-19. *medRxiv*. 2020.
562. Veiga VC, Prats JA, Farias DL, Rosa RG, Dourado LK, Zampieri FG, et al. Effect of tocilizumab on clinical outcomes at 15 days in patients with severe or critical coronavirus disease 2019: randomised controlled trial. *Bmj*. 2021;372.
563. Vernaz-Hegi N, Agoritsas T, Calmy A, Gayet-Ageron A, Gold G, Perrier A, et al. Early experimental COVID-19 therapies: associations with length of hospital stay, mortality and related costs. *Swiss Medical Weekly*. 2020;150:w20446.
564. Vlaar AP, de Bruin S, Busch M, Timmermans SA, van Zeggeren IE, Koning R, et al. Anti-C5a antibody IFX-1 (vilobelimab) treatment versus best supportive care for patients with severe COVID-19 (PANAMO): an exploratory, open-label, phase 2 randomised controlled trial. *The Lancet Rheumatology*. 2020;2(12):e764-e73.
565. Wadud N, Ahmed N, Shergil MM, Khan M, Krishna MG, Gilani A, et al. Improved survival outcome in SARs-CoV-2 (COVID-19) acute respiratory distress syndrome patients with tocilizumab administration. *medRxiv*. 2020.
566. Wadud N, Ahmed N, Shergil M, Khan M, Krishna M, Gilani A, et al. 151: Does Tocilizumab Improve Survival Outcome in COVID-19 Acute Respiratory Distress Syndrome Patients? *Critical Care Medicine*. 2021;49(1):61.
567. Wall GC, Smith HL, Trump MW, Mohr JD, DuMontier SP, Sabates BL, et al. Pentoxifylline or theophylline use in hospitalized COVID- 19 patients requiring oxygen support. *The Clinical Respiratory Journal*. 2021.
568. Wang B, Li D, Liu T, Wang H, Luo F, Liu Y. Subcutaneous injection of IFN alpha-2b for COVID-19: an observational study. *BMC infectious diseases*. 2020;20(1):1-6.
569. Wang D, Fu B, Peng Z, Yang D, Han M, Li M, et al. Tocilizumab in patients with moderate or severe COVID-19: a randomized, controlled, open-label, multicenter trial. *Frontiers of medicine*. 2021:1-9.
570. Wang M, Zhao Y, Hu W, Zhao D, Zhang Y, Wang T, et al. Treatment of COVID-19 Patients with Prolonged Post-Symptomatic Viral Shedding with Leflunomide--a

**Comparative-effectiveness research of COVID-19 treatment: A rapid scoping review**

- Single-Center, Randomized, Controlled Clinical Trial. *Clinical Infectious Diseases: An Official Publication of the Infectious Diseases Society of America*. 2020.
571. Wang Q, Guo H, Li Y, Jian X, Hou X, Zhong N, et al. Efficacy and safety of leflunomide for refractory COVID-19: an open-label controlled study. *MedRxiv*. 2020.
572. Wang W, Zhao X, Wei W, Fan W, Gao K, He S, et al. Angiotensin-converting enzyme inhibitors (ACEI) or angiotensin receptor blockers (ARBs) may be safe for COVID-19 patients. *BMC infectious diseases*. 2021;21(1):1-8.
573. Wang X, Xie P, Sun G, Zhao M, Deng Z, Zhou Y, et al. A systematic review and meta-analysis of the efficacy and safety of arbidol in the treatment of coronavirus disease 2019. *Medicine*. 2020;99(30).
574. Wang Y, Jiang W, He Q, Wang C, Wang B, Zhou P, et al. Early, low-dose and short-term application of corticosteroid treatment in patients with severe COVID-19 pneumonia: single-center experience from Wuhan, China. *MedRxiv*. 2020.
575. Wang Y, Zhang D, Du G, Du R, Zhao J, Jin Y, et al. Remdesivir in adults with severe COVID-19: a randomised, double-blind, placebo-controlled, multicentre trial. *The lancet*. 2020;395(10236):1569-78.
576. Webb BJ, Buckel W, Vento T, Butler AM, Grisel N, Brown SM, et al. Real-World Effectiveness and Tolerability of Monoclonal Antibodies for Ambulatory Patients with Early COVID-19. *medRxiv*. 2021.
577. Weinreich DM, Sivapalasingam S, Norton T, Ali S, Gao H, Bhoore R, et al. REGN-COV2, a neutralizing antibody cocktail, in outpatients with Covid-19. *New England Journal of Medicine*. 2021;384(3):238-51.
578. Wong CK, Wan EY, Luo S, Ding Y, Lau EH, Ling P, et al. Clinical outcomes of different therapeutic options for COVID-19 in two Chinese case cohorts: A propensity-score analysis. *EClinicalMedicine*. 2021;32:100743.
579. Wu C, Hou D, Du C, Cai Y, Zheng J, Xu J, et al. Corticosteroid therapy for coronavirus disease 2019-related acute respiratory distress syndrome: a cohort study with propensity score analysis. *Critical Care*. 2020;24(1):1-10.
580. Wu J, Huang J, Zhu G, Liu Y, Xiao H, Zhou Q, et al. Systemic corticosteroids and mortality in severe and critical COVID-19 patients in Wuhan, China. *The Journal of Clinical Endocrinology & Metabolism*. 2020;105(12):e4230-e9.
581. Wu M, Ji J-J, Zhong L, Shao Z-Y, Xie Q-F, Liu Z-Y, et al. Thymosin  $\alpha$ 1 therapy in critically ill patients with COVID-19: a multicenter retrospective cohort study. *International immunopharmacology*. 2020;88:106873.
582. Wu X, Yu K, Wang Y, Xu W, Ma H, Hou Y, et al. Efficacy and safety of triazavirin therapy for coronavirus disease 2019: a pilot randomized controlled trial. *Engineering*. 2020;6(10):1185-91.
583. Xia X, Li K, Wu L, Wang Z, Zhu M, Huang B, et al. Improved Clinical Symptoms and Mortality on Severe/Critical COVID-19 Patients Utilizing Convalescent Plasma Transfusion. *Blood*. 2020.
584. Xu P, Huang J, Fan Z, Huang W, Qi M, Lin X, et al. Arbidol/IFN- $\alpha$ 2b therapy for patients with corona virus disease 2019: a retrospective multicenter cohort study. *Microbes and infection*. 2020;22(4-5):200-5.
585. Xu X, Jiang W, Chen L, Xu Z, Zhang Q, Zhu M, et al. Evaluation of the safety and efficacy of using human menstrual blood- derived mesenchymal stromal cells in

**Comparative-effectiveness research of COVID-19 treatment: A rapid scoping review**

- treating severe and critically ill COVID- 19 patients: An exploratory clinical trial. *Clinical and translational medicine*. 2021;11(2):e297.
586. Xue H, Liu Y, Luo P, Liu X, Qiu L, Liu D, et al. Hydroxychloroquine treatment in COVID- 19: A descriptive observational analysis of 30 cases from a single center in Wuhan, China. *Journal of Medical Virology*. 2020;92(11):2523-7.
587. Yadegarinia D, Tehrani S, Abolghasemi S, Zarghi A, Sali S, Zolfaghari F. Evaluation of the efficacy of arbidol in comparison with the standard treatment regimen of hospitalized patients with Covid-19: a randomized clinical trial. *Archives of Clinical Infectious Diseases*. 2020;15(5).
588. Yan D, Liu X-Y, Zhu Y-n, Huang L, Dan B-t, Zhang G-j, et al. Factors associated with prolonged viral shedding and impact of lopinavir/ritonavir treatment in hospitalised non-critically ill patients with SARS-CoV-2 infection. *European Respiratory Journal*. 2020;56(1).
589. Ye X, Luo Y, Xia S, Sun Q, Ding J, Zhou Y, et al. Clinical efficacy of lopinavir/ritonavir in the treatment of Coronavirus disease 2019. *Eur Rev Med Pharmacol Sci*. 2020;24(6):3390-6.
590. Yormaz B, Ergün D, Tülek B, Ergün R, Arslan U, Kanat F. Impact of low molecular weight heparin administration on the clinical course of the COVID-19 disease. *Turkish journal of medical sciences*. 2021;51(1):28-38.
591. You X, Wu C-h, Fu Y-n, He Z, Huang P-f, Chen G-p, et al. The use of methylprednisolone in COVID-19 patients: A propensity score matched retrospective cohort study. *PloS one*. 2020;15(12):e0244128.
592. Yu B, Gutierrez VP, Carlos A, Hoge G, Pillai A, Kelly JD, et al. Empiric use of anticoagulation in hospitalized patients with COVID-19: a propensity score-matched study of risks and benefits. *Biomarker research*. 2021;9(1):1-11.
593. Yu B, Li C, Chen P, Zhou N, Wang L, Li J, et al. Low dose of hydroxychloroquine reduces fatality of critically ill patients with COVID-19. *Science China Life Sciences*. 2020;63(10):1515-21.
594. Yu J, Lu X, Tong L, Shi X, Ma J, Lv F, et al. Interferon-  $\alpha$ - 2b Aerosol Inhalation is Associated with Improved Clinical Outcomes in Patients with Coronavirus Disease- 2019. *British Journal of Clinical Pharmacology*. 2021.
595. Yu T, Tian C, Chu S, Zhou H, Zhang Z, Luo S, et al. COVID- 19 patients benefit from early antiviral treatment: A comparative, retrospective study. *Journal of Medical Virology*. 2020;92(11):2675-83.
596. Yuan M, Xu X, Xia D, Tao Z, Yin W, Tan W, et al. Effects of corticosteroid treatment for non-severe COVID-19 pneumonia: a propensity score-based analysis. *Shock*. 2020;54(5):638-43.
597. Zambrano GMT, Rivero RA, Valverde CV, Carmenate YV. Features and outcomes of secondary sepsis and urinary tract infections in COVID-19 patients treated with stem cell nebulization. *medRxiv*. 2020.
598. Zambrano GMT, Valverde CAV, Hernandez AB, Hadi LA, Rivero RA, Carmenate YV. Renal Involvement in Patients with COVID-19 Pneumonia and Outcomes After Stem Cell Nebulization. *medRxiv*. 2020.
599. Zantah M, Castillo ED, Gangemi AJ, Patel M, Chowdhury J, Verga S, et al. Anakinra and intravenous IgG versus tocilizumab in the treatment of COVID-19 pneumonia. *medRxiv*. 2020.

**Comparative-effectiveness research of COVID-19 treatment: A rapid scoping review**

600. Zarychanski R, Investigators A. Therapeutic anticoagulation in critically ill patients with Covid-19—preliminary report. medRxiv. 2021.
601. Zha L, Li S, Pan L, Tefsen B, Li Y, French N, et al. Corticosteroid treatment of patients with coronavirus disease 2019 (COVID- 19). *Medical Journal of Australia*. 2020;212(9):416-20.
602. Zha L, Li S, Pan L, Tefsen B, Li Y, French N, et al. Corticosteroid treatment of patients with coronavirus disease 2019 (COVID- 19). *Medical Journal of Australia*. 2020;212(9):416-20.
603. Zhang C, Jin H, Wen Y, Yin G. A systematic review and network meta-analysis for COVID-19 treatments. *MedRxiv*. 2020.
604. Zhang X-J, Qin J-J, Cheng X, Shen L, Zhao Y-C, Yuan Y, et al. In-hospital use of statins is associated with a reduced risk of mortality among individuals with COVID-19. *Cell metabolism*. 2020;32(2):176-87. e4.
605. Zhao B, Liu M, Liu P, Peng Y, Huang J, Li M, et al. High Dose Intravenous Vitamin C for Preventing The Disease Aggravation of Moderate COVID-19 Pneumonia. A Retrospective Propensity Matched Before-After Study. *Frontiers in pharmacology*. 2021;12:519.
606. Zhao H, Zhang C, Zhu Q, Chen X, Chen G, Sun W, et al. Favipiravir in the treatment of patients with SARS-CoV-2 RNA recurrent positive after discharge: A multicenter, open-label, randomized trial. *International immunopharmacology*. 2021;97:107702.
607. Zhao H, Zhu Q, Zhang C, Li J, Wei M, Qin Y, et al. Tocilizumab combined with favipiravir in the treatment of COVID-19: A multicenter trial in a small sample size. *Biomedicine & Pharmacotherapy*. 2021;133:110825.
608. Zheng F, Zhou Y, Zhou Z, Ye F, Huang B, Huang Y, et al. SARS-CoV-2 clearance in COVID-19 patients with Novaferon treatment: A randomized, open-label, parallel-group trial. *International Journal of Infectious Diseases*. 2020;99:84-91.
609. Zheng K-L, Xu Y, Guo Y-F, Diao L, Kong X-Y, Wan X-J, et al. Efficacy and safety of tocilizumab in COVID-19 patients. *Aging (Albany NY)*. 2020;12(19):18878.
610. Zhu M-E, Wang Q, Zhou S, Wang B, Ke L, He P. Recombinant interleukin-2 stimulates lymphocyte recovery in patients with severe COVID-19. *Experimental and Therapeutic Medicine*. 2021;21(3):1-

## Comparative-effectiveness research of COVID-19 treatment: A rapid scoping review

### Appendix 5. List of included knowledge syntheses.

1. Abdelrahman, Z., et al., Evaluation of the current therapeutic approaches for COVID-19: a systematic review and a meta-analysis. *Frontiers in pharmacology*, 2021. 12: p. 30.
2. Abdulrahman, B., et al., Tocilizumab Effect in COVID-19 Hospitalized Patients: A Systematic Review and Meta-Analysis of Randomized Control Trials. *medRxiv*, 2021.
3. Abeldaño Zuñiga, R.A., et al., Clinical effectiveness of drugs in hospitalized patients with COVID-19: a systematic review and meta-analysis. *Therapeutic advances in respiratory disease*, 2021. 15: p. 17534666211007214.
4. Abubakar, A.R., et al., Systematic review on the therapeutic options for COVID-19: clinical evidence of drug efficacy and implications. *Infection and drug resistance*, 2020. 13: p. 4673.
5. Agstam, S., et al., Hydroxychloroquine and QTc prolongation in patients with COVID-19: a systematic review and meta-analysis. *Indian Pacing and Electrophysiology Journal*, 2021. 21(1): p. 36-43.
6. Ahmad, A., M. Salsabil, and T. Oliver, Mortality rates in matched cohort, pseudo-randomised and randomised trials of convalescent plasma given to COVID-19 patients. *medRxiv*, 2020.
7. Alexander, P.E., et al., Remdesivir use in patients with coronavirus COVID-19 disease: a systematic review and meta-analysis. *MedRXiv*, 2020.
8. Alhumaid, S., et al., Efficacy and safety of lopinavir/ritonavir for treatment of COVID-19: a systematic review and meta-analysis. *Tropical medicine and infectious disease*, 2020. 5(4): p. 180.
9. Ali, S., et al., Differential effect of corticosteroid treatment on Influenza, SARS, MERS, and SARS-CoV-2 patients: A meta-analysis and systematic review. *medRxiv*, 2021.
10. Alzghari, S.K. and V.S. Acuña, Supportive treatment with tocilizumab for COVID-19: a systematic review. *Journal of Clinical Virology*, 2020. 127: p. 104380.
11. Amani, B., A. Khanijahani, and B. Amani, Hydroxychloroquine plus standard of care compared with standard of care alone in COVID-19: a meta-analysis of randomized controlled trials. *Scientific Reports*, 2021. 11(1): p. 1-10.
12. Antwi- Amoabeng, D., et al., Clinical outcomes in COVID- 19 patients treated with tocilizumab: An individual patient data systematic review. *Journal of medical virology*, 2020. 92(11): p. 2516-2522.
13. Aviani, J.K., et al., Current views on the potentials of convalescent plasma therapy (CPT) as Coronavirus disease 2019 (COVID- 19) treatment: A systematic review and meta- analysis based on recent studies and previous respiratory pandemics. *Reviews in medical virology*, 2021.
14. Axfors, C., et al., Mortality outcomes with hydroxychloroquine and chloroquine in COVID-19 from an international collaborative meta-analysis of randomized trials. *Nature communications*, 2021. 12(1): p. 1-13.
15. Aziz, M., et al., Efficacy of tocilizumab in COVID- 19: a systematic review and meta- analysis. *Journal of Medical Virology*, 2021. 93(3): p. 1620-1630.



**Comparative-effectiveness research of COVID-19 treatment: A rapid scoping review**

16. Bakhtawar, N., M. Usman, and M.M.U. Khan, Convalescent plasma therapy and its effects on COVID-19 patient outcomes: a systematic review of current literature. *Cureus*, 2020. 12(8).
17. Baladia, E., et al., Vitamin C for COVID-19: A living systematic review. *Medwave*, 2020. 20(6).
18. Bansal, V., et al., Mortality benefit of remdesivir in COVID-19: a systematic review and meta-analysis. *Frontiers in medicine*, 2020. 7.
19. Barboza, J.J., et al., Assessment and management of asymptomatic COVID-19 infection: A Systematic Review. *Travel medicine and infectious disease*, 2021: p. 102058.
20. Barkas, F., et al., Anakinra in hospitalized non-intubated patients with coronavirus disease 2019: a systematic review and meta-analysis. *Rheumatology (Oxford, England)*, 2021.
21. Baroutjian, A., et al., SARS-CoV-2 pharmacologic therapies and their safety/effectiveness according to level of evidence. *The American Journal of Emergency Medicine*, 2020.
22. Barreira, D.F., et al., Assessment of the safety and therapeutic benefits of convalescent plasma in COVID-19 treatment: a systematic review and meta-analysis. *Frontiers in medicine*, 2021. 8.
23. Barzkar, F., et al., Efficacy and safety of chloroquine and hydroxychloroquine for COVID-19: A comprehensive evidence synthesis of clinical, animal, and in vitro studies. *Medical Journal of the Islamic Republic of Iran*, 2020. 34: p. 171.
24. Bassatne, A., et al., The link between COVID-19 and Vitamin D (VIVID): a systematic review and meta-analysis. *Metabolism*, 2021: p. 154753.
25. Bhattacharyya, A., et al., Safety and efficacy of lopinavir/ritonavir combination in COVID-19: A systematic review, meta-analysis, and meta-regression analysis. *Indian journal of pharmacology*, 2020. 52(4): p. 313.
26. Bhowmick, S., et al., Safety and Efficacy of Ivermectin and Doxycycline Monotherapy and in Combination in the Treatment of COVID-19: A Scoping Review. *Drug safety*, 2021: p. 1-10.
27. Bignardi, P.R., et al., Use of hydroxychloroquine and chloroquine in patients with COVID-19: a meta-analysis of randomized clinical trials. *Pathogens and global health*, 2021. 115(3): p. 139-150.
28. Bokharee, N., et al., Pharmacological interventions for COVID-19: a systematic review of observational studies and clinical trials. *Expert Review of Anti-infective Therapy*, 2021(just-accepted).
29. Boregowda, U., et al., Addition of tocilizumab to the standard of care reduces mortality in severe COVID-19: a systematic review and meta-analysis. *Frontiers in medicine*, 2020. 7.
30. Budhathoki, P., et al., Is Hydroxychloroquine with Azithromycin a Good Combination in COVID-19 Compared to Hydroxychloroquine Alone from Cardiac Perspective? A Systematic Review and Meta-Analysis. *Journal of Nepal Health Research Council*, 2021. 19(1): p. 1-9.
31. Budhathoki, P., et al., Corticosteroids in COVID-19: Is it rational? A Systematic review and meta-analysis. *SN comprehensive clinical medicine*, 2020: p. 1-21.

**Comparative-effectiveness research of COVID-19 treatment: A rapid scoping review**

32. Cano, E.J., et al., Impact of corticosteroids in coronavirus disease 2019 outcomes: systematic review and meta-analysis. *Chest*, 2021. 159(3): p. 1019-1040.
33. Cantini, F., et al., Immune therapy, or antiviral therapy, or both for COVID-19: a systematic review. *Drugs*, 2020: p. 1-18.
34. Castañeda-Sabogal, A., et al., Outcomes of Ivermectin in the treatment of COVID-19: a systematic review and meta-analysis. *medRxiv*, 2021.
35. Celotto, S., et al., An umbrella review of systematic reviews with meta-analyses evaluating positive and negative outcomes of hydroxychloroquine and chloroquine therapy. *International Journal of Infectious Diseases*, 2020.
36. Chacko, J., G. Brar, and R. Premkumar, Hydroxychloroquine in COVID-19: an updated systematic review and meta-analysis. *Medrxiv*, 2020.
37. Chandrasekar, V.T., et al., A Systematic Review and Meta-analysis of Therapeutic options against SARS-CoV-2. *medRxiv*, 2020.
38. Chaudhuri, D., et al., Corticosteroids in COVID-19 and non-COVID-19 ARDS: a systematic review and meta-analysis. *Intensive care medicine*, 2021: p. 1-17.
39. Chen, C., et al., Safety of hydroxychloroquine in COVID-19 and other diseases: a systematic review and meta-analysis of 53 randomized trials. *European journal of clinical pharmacology*, 2021. 77(1): p. 13-24.
40. Chen, C.-x., et al., JAK-inhibitors for coronavirus disease-2019 (COVID-19): a meta-analysis. *Leukemia*, 2021: p. 1-5.
41. Chenchula, S., A. Ray, and B. Sadasivam, Famotidine Repurposing for Novel Corona Virus Disease of 2019: A Systematic Review. *Drug research*, 2021.
42. Cheng, W., et al., Efficacy and safety of corticosteroid treatment in patients with COVID-19: a systematic review and meta-analysis. *Frontiers in pharmacology*, 2020. 11: p. 1378.
43. Chiu, L., et al., Colchicine use in patients with COVID-19: A systematic review and meta-analysis. *MedRxiv*, 2021.
44. Chiu, L., et al., Effect of famotidine on hospitalized patients with COVID-19: A systematic review and meta-analysis. *PloS one*, 2021. 16(11): p. e0259514.
45. Chivese, T., et al., A meta-review of systematic reviews and an updated meta-analysis on the efficacy of chloroquine and hydroxychloroquine in treating COVID19 infection. *medRxiv*, 2020: p. 2020.07. 28.20164012.
46. Choudhuri, A.H., et al., The efficacy and safety of hydroxychloroquine (HCQ) in treatment of COVID19—a systematic review and meta-analysis. *Indian Journal of Medical Microbiology*, 2021.
47. Choupoo, N.S., et al., Evaluating the Efficacy and Safety of the Existing Repurposed Pharmacological Agents for Treating COVID-19: A Meta-analysis and Systematic Review of Clinical Trials. *Indian Journal of Critical Care Medicine: Peer-reviewed, Official Publication of Indian Society of Critical Care Medicine*, 2020. 24(11): p. 1106.
48. Cioca, G., et al., Immunosuppression drugs seize the overacting immune system by preventing the cytokine storm in covid-19 symptoms. *Systematic Reviews in Pharmacy*, 2021. 12(2).
49. Coomes, E.A. and H. Haghbayan, Interleukin- 6 in COVID- 19: a systematic review and meta- analysis. *Reviews in medical virology*, 2020. 30(6): p. 1-9.

**Comparative-effectiveness research of COVID-19 treatment: A rapid scoping review**

50. Cordeiro, L.P., et al., Perspectives on glucocorticoid treatment for COVID-19: a systematic review. *Pharmacological Reports*, 2021: p. 1-8.
51. Cortegiani, A., et al., Rationale and evidence on the use of tocilizumab in COVID-19: a systematic review. *Pulmonology*, 2021. 27(1): p. 52-66.
52. Cortegiani, A., et al., Update I. A systematic review on the efficacy and safety of chloroquine/hydroxychloroquine for COVID-19. *Journal of critical care*, 2020.
53. Das, R.R., et al., Efficacy and safety of anti-malarial drugs (chloroquine and hydroxychloroquine) in treatment of COVID-19 infection: a systematic review and meta-analysis. *Frontiers in medicine*, 2020. 7: p. 482.
54. Del Pozo, J.S.-G., et al., A systematic review on the efficacy and safety of IL-6 modulatory drugs in the treatment of COVID-19 patients. *Eur Rev Med Pharmacol Sci*, 2020. 24(13): p. 7475-7484.
55. Di Castelnuovo, A., et al., Low dose hydroxychloroquine is associated with lower mortality in COVID-19: a meta-analysis of 26 studies and 44,521 patients. *medRxiv*, 2020.
56. Diallo, A., et al., An updated systematic review and network meta-analysis of 25 randomized trials assessing the efficacy and safety of treatments in COVID-19 disease. *Journal of Public Health Research*, 2021. 10(1).
57. Diaz- Arocutipá, C., A. Brañez- Condorena, and A.V. Hernandez, QTc prolongation in COVID- 19 patients treated with hydroxychloroquine, chloroquine, azithromycin, or lopinavir/ritonavir: A systematic review and meta- analysis. *Pharmacoepidemiology and Drug Safety*, 2021. 30(6): p. 694-706.
58. Dong, Y., et al., Current COVID-19 treatments: Rapid review of the literature. *Journal of global health*, 2021. 11.
59. Ebina-Shibuya, R., et al., Hydroxychloroquine and chloroquine for treatment of coronavirus disease 19 (COVID-19): a systematic review and meta-analysis of randomized and non-randomized controlled trials. *Journal of Thoracic Disease*, 2021. 13(1): p. 202.
60. Elavarasi, A., et al., Chloroquine and hydroxychloroquine for the treatment of COVID-19: a systematic review and meta-analysis. *Journal of general internal medicine*, 2020: p. 1-7.
61. Elavarasi, A., et al., Anti-interleukin-6 therapies for Covid-19: A systematic review, critical appraisal and meta-analysis. *The National Medical Journal of India*, 2020. 33(3): p. 152.
62. Eljaaly, K., et al., Hydroxychloroquine safety: A meta-analysis of randomized controlled trials. *Travel medicine and infectious disease*, 2020. 36: p. 101812.
63. Elsawah, H.K., et al., Efficacy and safety of remdesivir in hospitalized Covid- 19 patients: systematic review and meta- analysis including network meta- analysis. *Reviews in medical virology*, 2021. 31(4): p. e2187.
64. Elsawah, H.K., et al., Hydroxychloroquine for treatment of nonsevere COVID- 19 patients: Systematic review and meta- analysis of controlled clinical trials. *Journal of medical virology*, 2021. 93(3): p. 1265-1275.
65. Eze, P., et al., Efficacy and safety of chloroquine and hydroxychloroquine for treatment of COVID-19 patients-a systematic review and meta-analysis of randomized controlled trials. *American journal of cardiovascular disease*, 2021. 11(1): p. 93.

**Comparative-effectiveness research of COVID-19 treatment: A rapid scoping review**

66. Fajgenbaum, D.C., et al., Treatments administered to the first 9152 reported cases of COVID-19: a systematic review. *Infectious diseases and therapy*, 2020. 9: p. 435-449.
67. Fiolet, T., et al., Effect of hydroxychloroquine with or without azithromycin on the mortality of coronavirus disease 2019 (COVID-19) patients: a systematic review and meta-analysis. *Clinical microbiology and infection*, 2021. 27(1): p. 19-27.
68. Flumignan, R.L., et al., Prophylactic anticoagulants for people hospitalised with COVID- 19. *Cochrane Database of Systematic Reviews*, 2020(10).
69. Ford, N., et al., Systematic review of the efficacy and safety of antiretroviral drugs against SARS, MERS or COVID- 19: initial assessment. *Journal of the International AIDS Society*, 2020. 23(4): p. e25489.
70. Gbinigie, K. and K. Frie, Should azithromycin be used to treat COVID-19? A rapid review. *BJGP open*, 2020. 4(2).
71. Gbinigie, K. and K. Frie, Should chloroquine and hydroxychloroquine be used to treat COVID-19? A rapid review. *BJGP open*, 2020. 4(2).
72. Ghazy, R.M., et al., A systematic review and meta-analysis on chloroquine and hydroxychloroquine as monotherapy or combined with azithromycin in COVID-19 treatment. *Scientific reports*, 2020. 10(1): p. 1-18.
73. Ghazy, R.M., et al., Effectiveness and Safety of Chloroquine or Hydroxychloroquine as a mono-therapy or in combination with Azithromycin in the treatment of COVID-19 patients: Systematic Review and Meta-Analysis. *medRxiv*, 2020.
74. Ghosn, L., et al., Interleukin- 6 blocking agents for treating COVID- 19: a living systematic review. *Cochrane Database of Systematic Reviews*, 2021(3).
75. Gupta, I., et al., 144: Clinical Outcomes of Remdesivir in COVID-19: A Systematic Review and Meta-Analysis. *Critical Care Medicine*, 2021. 49(1): p. 57.
76. Halpin, D.M., D. Singh, and R.M. Hadfield, Inhaled corticosteroids and COVID-19: a systematic review and clinical perspective. *European Respiratory Journal*, 2020. 55(5).
77. Han, Q., et al., Current evidence of interleukin-6 signaling inhibitors in patients with COVID-19: a systematic review and meta-analysis. *Frontiers in pharmacology*, 2020. 11: p. 2119.
78. Hariyanto, T.I., et al., Colchicine treatment can improve outcomes of coronavirus disease 2019 (COVID- 19): a systematic review and meta- analysis. *Clinical and Experimental Pharmacology and Physiology*, 2021. 48(6): p. 823-830.
79. Hariyanto, T.I., W. Hardyson, and A. Kurniawan, Efficacy and safety of tocilizumab for coronavirus disease 2019 (Covid-19) patients: a systematic review and meta-analysis. *Drug Research*, 2021.
80. Hasan, S.S., et al., Mortality in COVID-19 patients with acute respiratory distress syndrome and corticosteroids use: a systematic review and meta-analysis. *Expert review of respiratory medicine*, 2020. 14(11): p. 1149-1163.
81. Hasan, S.S., et al., Does methylprednisolone reduce the mortality risk in hospitalized COVID-19 patients? A meta-analysis of randomized control trials. *Expert review of respiratory medicine*, 2021(just-accepted).
82. Hasan, S.S., et al., Venous thromboembolism in critically ill COVID-19 patients receiving prophylactic or therapeutic anticoagulation: a systematic review and meta-analysis. *Journal of thrombosis and thrombolysis*, 2020. 50(4): p. 814-821.

**Comparative-effectiveness research of COVID-19 treatment: A rapid scoping review**

83. Hassanipour, S., et al., The efficacy and safety of Favipiravir in treatment of COVID-19: A systematic review and meta-analysis of clinical trials. *Scientific reports*, 2021. 11(1): p. 1-11.
84. Hernandez, A.V., et al., Hydroxychloroquine or chloroquine for treatment or prophylaxis of COVID-19: a living systematic review. *Annals of internal medicine*, 2020. 173(4): p. 287-296.
85. Hill, T., et al., Comprehensive Systematic Review to Identify putative COVID-19 Treatments: Roles for Immunomodulator and Antiviral Treatments. *medRxiv*, 2020.
86. Ho, T.-C., et al., Chloroquine and Hydroxychloroquine: Efficacy in the Treatment of the COVID-19. *Pathogens*, 2021. 10(2): p. 217.
87. Hong, T.S., et al., Impact of Hydroxychloroquine on Mortality in Hospitalized Patients with COVID-19: Systematic Review and Meta-Analysis. *Pharmacy*, 2020. 8(4): p. 208.
88. Huang, D., et al., Efficacy and safety of umifenovir for coronavirus disease 2019 (COVID- 19): A systematic review and meta- analysis. *Journal of medical virology*, 2021. 93(1): p. 481-490.
89. Hussain, N., et al., A Meta-Analysis on the Effects of Hydroxychloroquine on COVID-19. *Cureus*, 2020. 12(8).
90. Hussain, N., et al., The effect of antivirals on COVID-19: A systematic review. *Expert Review of Anti-infective Therapy*, 2021. 19(4): p. 473-486.
91. Hussain, S., et al., Efficacy of Tocilizumab in Covid 19: A metanalysis of case series studies. 2020.
92. Ibekwe, T., P. Ibekwe, and E.A. Orimadegun, Third force in the treatment of COVID-19: A systematic review and meta-analysis. *Annals of Medicine and Surgery*, 2021: p. 102218.
93. Jiang, W., et al., Clinical efficacy of convalescent plasma therapy on treating COVID- 19 patients: Evidence from matched study and a meta- analysis. *Clinical and translational medicine*, 2020. 10(8).
94. Jiang, Y., et al., Effectiveness of remdesivir for the treatment of hospitalized Covid-19 persons: a network meta- analysis. *Journal of medical virology*, 2021. 93(2): p. 1171-1174.
95. Joseph, B.A., et al., Efficacy and safety of lopinavir/ritonavir in the treatment of COVID-19: A systematic review. *Expert review of anti-infective therapy*, 2021. 19(6): p. 679-687.
96. Julia del Amo, M., Systematic review and meta-analysis of randomized trials of. 2021.
97. Juul, S., et al., Interventions for treatment of COVID-19: of a living systematic review with meta-analyses and trial sequential analyses (The LIVING Project). *PloS one*, 2021. 16(3): p. e0248132.
98. Kaka, A.S., et al., Major update: remdesivir for adults with COVID-19: a living systematic review and meta-analysis for the American College of Physicians Practice Points. *Annals of internal medicine*, 2021. 174(5): p. 663-672.
99. Kalfas, S., et al., The therapeutic potential of ivermectin for COVID-19: A review of mechanisms and evidence. *medRxiv*, 2020.

**Comparative-effectiveness research of COVID-19 treatment: A rapid scoping review**

100. Kamel, A.M., et al., Anticoagulation outcomes in hospitalized Covid- 19 patients: A systematic review and meta- analysis of case- control and cohort studies. *Reviews in medical virology*, 2021. 31(3): p. e2180.
101. Karale, S., et al., A Meta-analysis of Mortality, Need for ICU admission, Use of Mechanical Ventilation and Adverse Effects with Ivermectin Use in COVID-19 Patients. *medRxiv*, 2021.
102. Kashour, Z., et al., Mortality, viral clearance, and other clinical outcomes of hydroxychloroquine in COVID- 19 Patients: A Systematic Review and Meta-Analysis of Randomized Controlled Trials. *Clinical and Translational Science*, 2021.
103. Kashour, Z., et al., Efficacy of chloroquine or hydroxychloroquine in COVID-19 patients: a systematic review and meta-analysis. *Journal of Antimicrobial Chemotherapy*, 2021. 76(1): p. 30-42.
104. Kaye, A.G. and R. Siegel, The efficacy of IL-6 inhibitor Tocilizumab in reducing severe COVID-19 mortality: a systematic review. *PeerJ*, 2020. 8: p. e10322.
105. Khalili, M., et al., Therapeutic interventions for COVID-19: a living overview of reviews. *Therapeutic Advances in Respiratory Disease*, 2020. 14: p. 1753466620976021.
106. Khan, F.A., et al., Systematic review and meta-analysis of anakinra, sarilumab, siltuximab and tocilizumab for COVID-19. *Thorax*, 2021.
107. Khan, S., et al., The trade-off dilemma in pharmacotherapy of COVID-19: systematic review, meta-analysis, and implications. *Expert Opinion on Pharmacotherapy*, 2020. 21(15): p. 1821-1849.
108. Khodashahi, R., et al., Effectiveness of antiviral and immunomodulatory agents in the treatment of covid-19: A systematic review. *Current Respiratory Medicine Reviews*, 2020. 16(3): p. 165-183.
109. Kim, M.S., et al., Comparative efficacy and safety of pharmacological interventions for the treatment of COVID-19: A systematic review and network meta-analysis. *PLoS medicine*, 2020. 17(12): p. e1003501.
110. Klassen, S.A., et al. The effect of convalescent plasma therapy on COVID-19 patient mortality: systematic review and Meta-analysis. in *Mayo Clinic Proceedings*. 2021. Elsevier.
111. Kotak, S., et al., Use of tocilizumab in COVID-19: a systematic review and meta-analysis of current evidence. *Cureus*, 2020. 12(10).
112. Kotecha, P., et al., Repurposing of drugs for Covid-19: a systematic review and meta-analysis. *MedRxiv*, 2020.
113. Kow, C.S., M. Aldeyab, and S.S. Hasan, Effect of remdesivir on mortality in patients with COVID- 19: A meta- analysis of randomized control trials. *Journal of Medical Virology*, 2021. 93(4): p. 1860-1861.
114. Kow, C.S., I.A.S. Burud, and S.S. Hasan. Use of Famotidine and Risk of Severe Course of Illness in Patients With COVID-19: A Meta-analysis. in *Mayo Clinic Proceedings*. 2021. Elsevier.
115. Kow, C.S. and S.S. Hasan, Meta-analysis of effect of statins in patients with COVID-19. *American Journal of Cardiology*, 2020. 134: p. 153-155.
116. Kow, C.S. and S.S. Hasan, A meta-analysis on the preadmission use of DPP-4 inhibitors and risk of a fatal or severe course of illness in patients with COVID-19. *Therapie*, 2020.

**Comparative-effectiveness research of COVID-19 treatment: A rapid scoping review**

117. Kow, C.S. and S.S. Hasan, Preadmission use of inhaled corticosteroids and risk of fatal or severe COVID-19: a meta-analysis. *Journal of Asthma*, 2021: p. 1-4.
118. Kumar, J., et al., Efficacy and safety of hydroxychloroquine/chloroquine against SARS-CoV-2 infection: a systematic review and meta-analysis. *Journal of Infection and Chemotherapy*, 2021.
119. Kyriazopoulou, E., et al., Effect of anakinra on mortality in COVID-19: a patient level meta-analysis. *medRxiv*, 2021.
120. Lai, C.-C., et al., Clinical efficacy and safety of remdesivir in patients with COVID-19: a systematic review and network meta-analysis of randomized controlled trials. *Journal of Antimicrobial Chemotherapy*, 2021.
121. Lan, S.-H., et al., Tocilizumab for severe COVID-19: a systematic review and meta-analysis. *International journal of antimicrobial agents*, 2020. 56(3): p. 106103.
122. Lazaridis, D., et al., The Impact of Anticoagulation on COVID-19 (SARS CoV-2) Patient Outcomes: A Systematic Review. *Journal of Pharmacy Practice*, 2021: p. 08971900211015055.
123. Lee, K.H., et al., Efficacy of corticosteroids in patients with SARS, MERS and COVID-19: a systematic review and meta-analysis. *Journal of clinical medicine*, 2020. 9(8): p. 2392.
124. Lepere, P., et al., COVID-19: Can early home treatment with Azithromycin alone or with Zinc help prevent hospitalisation, death, and long-COVID-19? A review. *medRxiv*, 2021: p. 2020.12. 29.20248975.
125. Li, H., et al., Impact of corticosteroid therapy on outcomes of persons with SARS-CoV-2, SARS-CoV, or MERS-CoV infection: a systematic review and meta-analysis. *Leukemia*, 2020. 34(6): p. 1503-1511.
126. Li, J., et al., Comparison of associations between glucocorticoids treatment and mortality in COVID-19 patients and SARS patients: a systematic review and meta-analysis. *Shock*, 2021.
127. Li, Y. and W. He, Comparative Efficacy and Safety of Current Drugs against COVID-19: a Systematic Review and Net-work Meta Analysis. *medRxiv*, 2020.
128. Liao, G., et al., A scoping review of registered clinical trials of cellular therapy for COVID-19 and a Framework for Accelerated Synthesis of Trial Evidence—FAST evidence. *Transfusion medicine reviews*, 2020. 34(3): p. 165-171.
129. Lima, W.G., et al., The potential of drug repositioning as a short-term strategy for the control and treatment of COVID-19 (SARS-CoV-2): a systematic review. *Archives of virology*, 2020. 165(8): p. 1729-1737.
130. Lin, W.-T., et al., The effect of tocilizumab on COVID-19 patient mortality: A systematic review and meta-analysis of randomized controlled trials. *International immunopharmacology*, 2021: p. 107602.
131. Liu, W., et al., Efficacy and safety of antiviral treatment for COVID-19 from evidence in studies of SARS-CoV-2 and other acute viral infections: a systematic review and meta-analysis. *Cmaj*, 2020. 192(27): p. E734-E744.
132. Lou, L., et al., The efficacy and safety of remdesivir in the treatment of patients with COVID-19: a systematic review and meta-analysis. *medRxiv*, 2021.
133. Lu, S., et al., Effectiveness and safety of glucocorticoids to treat COVID-19: a rapid review and meta-analysis. *Annals of translational medicine*, 2020. 8(10).

**Comparative-effectiveness research of COVID-19 treatment: A rapid scoping review**

134. Lu, Y.-f., et al., A meta-analysis of the incidence of venous thromboembolic events and impact of anticoagulation on mortality in patients with COVID-19. *International journal of infectious diseases*, 2020. 100: p. 34-41.
135. Ma, S., et al., Efficacy and safety of systematic corticosteroids among severe COVID-19 patients: a systematic review and meta-analysis of randomized controlled trials. *Signal transduction and targeted therapy*, 2021. 6(1): p. 1-7.
136. Mackey, K., et al., Risks and impact of angiotensin-converting enzyme inhibitors or angiotensin-receptor blockers on SARS-CoV-2 infection in adults: a living systematic review. *Annals of internal medicine*, 2020. 173(3): p. 195-203.
137. Mahendiratta, S., et al., Stem cell therapy in COVID-19: Pooled evidence from SARS-CoV-2, SARS-CoV, MERS-CoV and ARDS: A systematic review. *Biomedicine & Pharmacotherapy*, 2021: p. 111300.
138. Mahmud, S., et al., 140: Efficacy and Safety of Tocilizumab in Hospitalized COVID-19 Patients: A Systematic Review. *Critical Care Medicine*, 2021. 49(1): p. 55.
139. Malaty, M., et al., Incidence and treatment of arrhythmias secondary to coronavirus infection in humans: a systematic review. *European Journal of Clinical Investigation*, 2021. 51(2): p. e13428.
140. Maldonado, E., D. Tao, and K. Mackey, Antithrombotic therapies in COVID-19 disease: a systematic review. *Journal of general internal medicine*, 2020: p. 1-9.
141. Malgie, J., J.W. Schoones, and B.G. Pijls, Decreased mortality in coronavirus disease 2019 patients treated with tocilizumab: a rapid systematic review and meta-analysis of observational studies. *Clinical Infectious Diseases*, 2021. 72(11): p. e742-e749.
142. Mansourabadi, A.H., et al., The immune system as a target for therapy of SARS-CoV-2: a systematic review of the current immunotherapies for COVID-19. *Life sciences*, 2020: p. 118185.
143. Maraolo, A.E. and A. Grossi, Safety of hydroxychloroquine for treatment or prevention of SARS-CoV-2 infection: A rapid systematic review and meta-analysis of randomized clinical trials. *Immunity, inflammation and disease*, 2021. 9(1): p. 31-36.
144. Mareev, V.Y., et al., Steroid pulse-therapy in patients With coronavirus Pneumonia (COVID-19), systemic inflammation And Risk of venous thrombosis and thromboembolism (WAYFARER Study). *Kardiologija*, 2020. 60(6): p. 15-29.
145. Matli, K., et al., Role of combining anticoagulant and antiplatelet agents in COVID-19 treatment: a rapid review. *Open heart*, 2021. 8(1): p. e001628.
146. Mehra, I., et al., 146: Controversial Role of Corticosteroids on Mortality in COVID-19: Systematic Review and Meta-Analysis. *Critical Care Medicine*, 2021. 49(1): p. 58.
147. Meyerowitz, E.A., et al., Immunomodulation as Treatment for Severe Coronavirus Disease 2019: A Systematic Review of Current Modalities and Future Directions. *Clinical Infectious Diseases*, 2021. 72(12): p. e1130-e1143.
148. Meza, N., et al., Angiotensin-converting-enzyme inhibitors and angiotensin II receptor blockers for COVID-19: A living systematic review of randomized clinical trials. *Medwave*, 2021. 21(02).
149. Million, M., et al., Clinical efficacy of chloroquine derivatives in COVID-19 infection: comparative meta-analysis between the big data and the real world. *New microbes and new infections*, 2020. 38: p. 100709.



**Comparative-effectiveness research of COVID-19 treatment: A rapid scoping review**

150. Misra, S., et al., Efficacy of various treatment modalities for nCOV- 2019: A systematic review and meta- analysis. *European Journal of Clinical Investigation*, 2020. 50(11): p. e13383.
151. Misra, S., et al., Effect of various treatment modalities on the novel coronavirus (nCOV-2019) infection in humans: a systematic review & meta-analysis. *medRxiv*, 2020.
152. Mohanty, R.R., et al., Repurposing Colchicine for the management of COVID-19: A systematic review and meta-analysis. *medRxiv*, 2021.
153. Moonla, C., et al., Anticoagulation and in-hospital mortality from coronavirus disease 2019: a systematic review and meta-analysis. *Clinical and Applied Thrombosis/Hemostasis*, 2021. 27: p. 10760296211008999.
154. Mori, H., et al., Diagnosis and treatment of disseminated intravascular coagulation in COVID-19 patients: a scoping review. *International Journal of Hematology*, 2021: p. 1-10.
155. Munir, M.A., et al., Effectiveness of the Use of Dexamethasone in Treatment of Coronavirus Infections: A Systematic Review. *Open Access Macedonian Journal of Medical Sciences*, 2020. 8(T1): p. 518-521.
156. Musa, A., et al., Remdesivir for the Treatment of COVID-19: A Systematic Review of the Literature. *Western Journal of Emergency Medicine*, 2020. 21(4): p. 737.
157. Nakhband, A., A. Fakhari, and H. Azizi, Interferon-beta offers promising avenues to COVID-19 treatment: a systematic review and meta-analysis of clinical trial studies. *Naunyn-schmiedeberg's Archives of Pharmacology*, 2021: p. 1-10.
158. Nasir, M., et al., Use of Remdesivir in the Management of COVID-19: A Systematic Review on Current Evidences. *Mymensingh medical journal: MMJ*, 2020. 29(2): p. 481-487.
159. Nikniaz, L., et al., The impact of vitamin D supplementation on mortality rate and clinical outcomes of COVID-19 patients: A systematic review and meta-analysis. *MedRxiv*, 2021.
160. Okoli, G.N., et al., Remdesivir for coronavirus disease 2019 (COVID-19): a systematic review with meta-analysis and trial sequential analysis of randomized controlled trials. *Infectious Diseases*, 2021: p. 1-9.
161. Onorato, D., et al. Protective effects of statins administration in European and North American patients infected with COVID-19: a meta-analysis. in *Seminars in Thrombosis and Hemostasis*. 2021. Thieme Medical Publishers, Inc.
162. Oscanoa, T.J., et al., Frequency of long QT in patients with SARS-CoV-2 infection treated with hydroxychloroquine: a meta-analysis. *International journal of antimicrobial agents*, 2020. 56(6): p. 106212.
163. Padhy, B.M., et al., Therapeutic potential of ivermectin as add on treatment in COVID 19: A systematic review and meta-analysis: Ivermectin in COVID-19: A meta-analysis. *Journal of Pharmacy & Pharmaceutical Sciences*, 2020. 23: p. 462-469.
164. Parisi, R., et al. Different Anticoagulant Regimens, Mortality, and Bleeding in Hospitalized Patients with COVID-19: A Systematic Review and an Updated Meta-Analysis. in *Seminars in Thrombosis and Hemostasis*. 2021. Thieme Medical Publishers, Inc.

**Comparative-effectiveness research of COVID-19 treatment: A rapid scoping review**

165. Pasin, L., et al., Anakinra for patients with COVID-19: a meta-analysis of non-randomized cohort studies. *European journal of internal medicine*, 2021. 86: p. 34-40.
166. Pasin, L., et al., Corticosteroids for patients with coronavirus disease 2019 (COVID-19) with different disease severity: a meta-analysis of randomized clinical trials. *Journal of cardiothoracic and vascular anesthesia*, 2021. 35(2): p. 578-584.
167. Patel, T.K., et al., Does adding of hydroxychloroquine to the standard care provide any benefit in reducing the mortality among COVID-19 patients?: a systematic review. *Journal of Neuroimmune Pharmacology*, 2020. 15: p. 350-358.
168. Patell, R., et al., Pharmacologic thromboprophylaxis and thrombosis in hospitalized patients with COVID-19: a pooled analysis. *Thrombosis and haemostasis*, 2021. 121(01): p. 076-085.
169. Pathak, S.K., et al., No benefit of hydroxychloroquine in COVID-19: results of systematic review and meta-analysis of randomized controlled trials". *Diabetes & Metabolic Syndrome: Clinical Research & Reviews*, 2020. 14(6): p. 1673-1680.
170. Pei, L., et al., Antiviral agents, glucocorticoids, antibiotics, and intravenous immunoglobulin usage in 1142 patients with coronavirus disease 2019: a systematic review and meta-analysis. *Polish archives of internal medicine*, 2020.
171. Peng, H.T., S.G. Rhind, and A. Beckett, Convalescent Plasma for the Prevention and Treatment of COVID-19: A Systematic Review and Quantitative Analysis. *JMIR public health and surveillance*, 2021. 7(4): p. e25500.
172. Permana, H., et al., In-hospital use of statins is associated with a reduced risk of mortality in coronavirus-2019 (COVID-19): systematic review and meta-analysis. *Pharmacological Reports*, 2021: p. 1-12.
173. Perveen, R., et al., Systematic review on current antiviral therapy in COVID-19 pandemic. *The Medical Journal of Malaysia*, 2020. 75(6): p. 710-716.
174. Piechotta, V., et al., Convalescent plasma or hyperimmune immunoglobulin for people with COVID-19: a living systematic review. *Cochrane Database of Systematic Reviews*, 2021(5).
175. Pimenoff, V.N., M. Elfstrom, and J. Dillner, A systematic review of convalescent plasma treatment for COVID19. *medRxiv*, 2020.
176. Pimentel, J., et al., Clinical studies assessing the efficacy, effectiveness and safety of remdesivir in management of COVID-19: A scoping review. *British journal of clinical pharmacology*, 2021. 87(7): p. 2663-2684.
177. Piscoya, A., et al., Efficacy and harms of remdesivir for the treatment of COVID-19: a systematic review and meta-analysis. *PloS one*, 2020. 15(12): p. e0243705.
178. Prakash, A., et al., Systematic review and meta-analysis of effectiveness and safety of favipiravir in the management of novel coronavirus (COVID-19) patients. *Indian Journal of Pharmacology*, 2020. 52(5): p. 414.
179. Prodromos, C.C., T. Rumschlag, and T. Perchyk, Hydroxychloroquine is protective to the heart, not harmful: a systematic review. *New microbes and new infections*, 2020. 37: p. 100747.
180. Putman, M., et al., Antirheumatic disease therapies for the treatment of covid-19: a systematic review and meta-analysis. *Arthritis & Rheumatology*, 2021. 73(1): p. 36-47.
181. Qiu, R., et al., The therapeutic effect and safety of the drugs for COVID-19: a systematic review and meta-analysis. *Medicine*, 2021. 100(16).

**Comparative-effectiveness research of COVID-19 treatment: A rapid scoping review**

182. Qu, W., et al., Cell- based therapy to reduce mortality from COVID- 19: Systematic review and meta- analysis of human studies on acute respiratory distress syndrome. *Stem Cells Translational Medicine*, 2020. 9(9): p. 1007-1022.
183. Rada, G., J. Corbalán, and P. Rojas, Cell-based therapies for COVID-19: A living systematic review. *medRxiv*, 2020.
184. Rajendran, K., et al., Convalescent plasma transfusion for the treatment of COVID-19: Systematic review. *Journal of medical virology*, 2020. 92(9): p. 1475-1483.
185. Raju, R., V. Prajith, and P.S. Biatris, Therapeutic role of corticosteroids in COVID-19: a systematic review of registered clinical trials. *Future Journal of Pharmaceutical Sciences*, 2021. 7(1): p. 1-18.
186. Rakedzon, S., et al., Hydroxychloroquine and coronavirus disease 2019: a systematic review of a scientific failure. *Rambam Maimonides Medical Journal*, 2020. 11(3).
187. Rakhmat, I.I., et al., Dipeptidyl peptidase-4 (DPP-4) inhibitor and mortality in coronavirus disease 2019 (COVID-19)—A systematic review, meta-analysis, and meta-regression. *Diabetes & Metabolic Syndrome: Clinical Research & Reviews*, 2021.
188. Razmi, M., et al., Immunomodulatory-based therapy as a potential promising treatment strategy against severe COVID-19 patients: A systematic review. *International immunopharmacology*, 2020. 88: p. 106942.
189. Ren, L., et al., Assessment of Chloroquine and Hydroxychloroquine Safety Profiles: A Systematic Review and Meta-Analysis. *Frontiers in pharmacology*, 2020. 11.
190. Rezaei, S., et al., Efficacy and safety of Tocilizumab in severe and critical COVID-19: A Systematic Review and Meta-Analysis. *Expert review of clinical immunology*, 2021. 17(5): p. 499-511.
191. Rezagholizadeh, A., et al., Remdesivir for treatment of COVID-19; an updated systematic review and meta-analysis. *European journal of pharmacology*, 2021: p. 173926.
192. Robinson, R., et al., Impact of systemic corticosteroids on hospitalized patients with COVID-19: January 2021 Meta-analysis of randomized controlled trials. *medRxiv*, 2021.
193. Rodrigo, C., S.D. Fernando, and S. Rajapakse, Clinical evidence for repurposing chloroquine and hydroxychloroquine as antiviral agents: a systematic review. *Clinical Microbiology and Infection*, 2020. 26(8): p. 979-987.
194. Rodriguez-Guerra, M., P. Jadhav, and T.J. Vittorio, Current treatment in COVID-19 disease: a rapid review. *Drugs in Context*, 2021. 10.
195. Roshanshad, A., et al., Remdesivir efficacy in coronavirus disease 2019 (COVID-19): A systematic review. *medRxiv*, 2020.
196. Rubio-Rivas, M., et al., Beneficial and harmful outcomes of tocilizumab in severe COVID-19: a systematic review and meta-analysis. *medRxiv*, 2020.
197. Salah, H.M. and J.L. Mehta, Meta-Analysis of the Effect of Aspirin on Mortality in COVID-19. *American Journal of Cardiology*, 2021. 142: p. 158-159.
198. Salah, H.M. and J.L. Mehta, Meta-analysis of the Effect of Colchicine on Mortality and Mechanical Ventilation in COVID-19. *American Journal of Cardiology*, 2021. 145: p. 170-172.
199. Salah, H.M., et al., The effect of anticoagulation use on mortality in COVID-19 infection. *American Journal of Cardiology*, 2020. 134: p. 155-157.

**Comparative-effectiveness research of COVID-19 treatment: A rapid scoping review**

200. Sarfraz, A., et al., Randomized controlled trials of remdesivir in hospitalized coronavirus disease 2019 patients: A meta-analysis. *Turkish Journal of Emergency Medicine*, 2021. 21(2): p. 43.
201. Sarfraz, A., et al., Randomized Controlled Trials of Remdesivir in Hospitalized COVID-19 Patients: A Systematic Review and Meta-Analysis. *medRxiv*, 2020.
202. Sarfraz, A., et al., Tocilizumab and COVID-19: a meta-analysis of 2120 patients with severe disease and implications for clinical trial methodologies. *Turkish journal of medical sciences*, 2021. 51(3): p. 890-897.
203. Sarkar, S., P. Khanna, and K.D. Soni, Are the steroids a blanket solution for COVID- 19? A systematic review and meta- analysis. *Journal of Medical Virology*, 2021. 93(3): p. 1538-1547.
204. Sarkar, S., K.D. Soni, and P. Khanna, Convalescent plasma is a clutch at straws in COVID- 19 management! A systematic review and meta- analysis. *Journal of medical virology*, 2021. 93(2): p. 1111-1118.
205. Sarma, P., et al., Efficacy and safety of steroid therapy in COVID-19: A rapid systematic review and Meta-analysis. *Indian Journal of Pharmacology*, 2020. 52(6): p. 535.
206. Sarma, P., et al., Virological and clinical cure in COVID- 19 patients treated with hydroxychloroquine: a systematic review and meta- analysis. *Journal of medical virology*, 2020. 92(7): p. 776-785.
207. Schoot, T.S., et al., Immunosuppressive drugs and COVID-19: a review. *Frontiers in pharmacology*, 2020. 11: p. 1333.
208. Seirafianpour, F., et al., Treatment of COVID- 19 with pentoxifylline: Could it be a potential adjuvant therapy? *Dermatologic Therapy*, 2020. 33(4): p. e13733.
209. Selvaraj, V., et al., Tocilizumab in hospitalized patients with COVID-19: A meta analysis of randomized controlled trials. *Lung*, 2021: p. 1-10.
210. Sethia, R., et al., Efficacy of famotidine for COVID-19: a systematic review and meta-analysis. *medRxiv*, 2020.
211. Setyawat, T. and A.S. Nugraha, Effectiveness of Dexamethasone for Acute Respiratory Distress Syndrome (ARDS) due to Coronavirus: A Systematic Review. *European Journal of Molecular & Clinical Medicine*, 2020. 7(8): p. 206-211.
212. Shah, S., et al., Effects of Hydroxychloroquine With or Without Azithromycin on QT Interval in COVID-19: A Systematic Review. *Electrophysiology Collaborative Consortium for Meta-analysis—Electram Investigators. American Journal of Therapeutics*, 2021.
213. Shamshirian, A., et al., The role of hydroxychloroquine in COVID-19 treatment: a systematic review and meta-analysis. *Ann Acad Med Singap*, 2020. 49: p. 789-800.
214. Shao, S., et al., Effect of convalescent blood products for patients with severe acute respiratory infections of viral etiology: a systematic review and meta-analysis. *International Journal of Infectious Diseases*, 2021. 102: p. 397-411.
215. Shi, Q., et al., Potential effectiveness and safety of antiviral agents in children with coronavirus disease 2019: a rapid review and meta-analysis. *Annals of translational medicine*, 2020. 8(10).
216. Shrestha, D.B., et al., Favipiravir versus other antiviral or standard of care for COVID-19 treatment: a rapid systematic review and meta-analysis. *Virology journal*, 2020. 17(1): p. 1-15.

**Comparative-effectiveness research of COVID-19 treatment: A rapid scoping review**

217. Shrestha, D.B., et al., Remdesivir: a potential game-changer or just a myth? A systematic review and meta-analysis. *Life sciences*, 2021. 264: p. 118663.
218. Shuto, H., et al., A systematic review of corticosteroid treatment for noncritically ill patients with COVID-19. *Scientific reports*, 2020. 10(1): p. 1-8.
219. Siemieniuk, R.A., et al., Drug treatments for covid-19: living systematic review and network meta-analysis. *Bmj*, 2020. 370.
220. Simmons, B., et al., Sofosbuvir/daclatasvir regimens for the treatment of COVID-19: an individual patient data meta-analysis. *Journal of Antimicrobial Chemotherapy*, 2021. 76(2): p. 286-291.
221. Singh, A.K., et al., Role of corticosteroid in the management of COVID-19: A systemic review and a Clinician's perspective. *Diabetes & Metabolic Syndrome: Clinical Research & Reviews*, 2020. 14(5): p. 971-978.
222. Singh, A.K., et al., Remdesivir in COVID-19: a critical review of pharmacology, pre-clinical and clinical studies. *Diabetes & Metabolic Syndrome: Clinical Research & Reviews*, 2020. 14(4): p. 641-648.
223. Singh, A.K., et al., Hydroxychloroquine in patients with COVID-19: A Systematic Review and meta-analysis. *Diabetes & Metabolic Syndrome: Clinical Research & Reviews*, 2020. 14(4): p. 589-596.
224. Singh, B., et al., Chloroquine or hydroxychloroquine for prevention and treatment of COVID-19. *The Cochrane database of systematic reviews*, 2020. 2020(4).
225. Singh, S. and T.J. Moore, Efficacy and Safety of Hydroxychloroquine and Chloroquine for COVID-19: A systematic review. *medRxiv*, 2020.
226. Siordia, J.A., et al., Systematic and statistical review of coronavirus disease 19 treatment trials. *SN Comprehensive Clinical Medicine*, 2020: p. 1-12.
227. Sridharan, G.K., et al., Venous thromboembolism in hospitalized COVID-19 patients. *American Journal of Therapeutics*, 2020. 27(6): p. e599-e610.
228. Stack, M., et al., BTK inhibitors for Severe Acute Respiratory Syndrome Coronavirus 2 (SARS-CoV-2): A Systematic Review. *Research Square*, 2021: p. rs. 3. rs-319342.
229. Sterne, J.A., et al., Association between administration of systemic corticosteroids and mortality among critically ill patients with COVID-19: a meta-analysis. *Jama*, 2020. 324(13): p. 1330-1341.
230. Sun, C., et al., Does Famotidine reduce the risk of progression to severe disease, death, and intubation for COVID-19 patients? A systemic review and meta-analysis. *Digestive diseases and sciences*, 2021: p. 1-9.
231. Sun, M., et al., A potentially effective treatment for COVID-19: A systematic review and meta-analysis of convalescent plasma therapy in treating severe infectious disease. *International Journal of Infectious Diseases*, 2020. 98: p. 334-346.
232. Taher, M., N. Tik, and D. Susanti, Drugs intervention study in COVID-19 management. *Drug Metabolism and Personalized Therapy*, 2021. 36(2): p. 87-98.
233. Takla, M. and K. Jeevaratnam, Chloroquine, hydroxychloroquine, and COVID-19: systematic review and narrative synthesis of efficacy and safety. *Saudi Pharmaceutical Journal*, 2020.
234. Talaie, H., et al., Is there any potential management against COVID-19? A systematic review and meta-analysis. *DARU Journal of Pharmaceutical Sciences*, 2020: p. 1-13.
235. Talasz, A.H., et al., Lipid-Modulating Agents for Prevention or Treatment of COVID-19 in Randomized Trials. *medRxiv*, 2021.

**Comparative-effectiveness research of COVID-19 treatment: A rapid scoping review**

236. Tharmarajah, E., et al., IL-6 inhibition in the treatment of COVID-19: A meta-analysis and meta-regression. *Journal of Infection*, 2021. 82(5): p. 178-185.
237. Thibault, F., et al., Hydroxychloroquine and mortality risk of patients with COVID-19: a systematic review and meta-analysis of human comparative studies. *medRxiv*, 2020.
238. Thoguluva Chandrasekar, V., et al., Systematic review and meta- analysis of effectiveness of treatment options against SARS- CoV- 2 infection. *Journal of medical virology*, 2021. 93(2): p. 775-785.
239. Tlayjeh, H., et al., Efficacy of Corticosteroids in COVID-19 Patients: A Systematic Review and Meta-Analysis. *medRxiv*, 2020.
240. Tlayjeh, H., et al., Association of corticosteroids use and outcomes in COVID-19 patients: A systematic review and meta-analysis. *Journal of infection and public health*, 2020.
241. Tleyjeh, I.M., et al., Cardiac toxicity of chloroquine or hydroxychloroquine in patients with COVID-19: a systematic review and meta-regression analysis. *Mayo Clinic Proceedings: Innovations, Quality & Outcomes*, 2021. 5(1): p. 137-150.
242. Tleyjeh, I.M., et al., Efficacy and safety of tocilizumab in COVID-19 patients: a living systematic review and meta-analysis. *Clinical Microbiology and Infection*, 2021. 27(2): p. 215-227.
243. Torres, Z.A., et al., Safety and Efficacy of Antiviral Drugs for the Treatment of Patients with SARS-CoV-2 Infection: A Systematic Review and Meta-analyses. *medRxiv*, 2020.
244. Tritschler, T., et al., Anticoagulant interventions in hospitalized patients with COVID- 19: A scoping review of randomized controlled trials and call for international collaboration. *Journal of thrombosis and haemostasis*, 2020. 18(11): p. 2958-2967.
245. Uaprasert, N., et al., Systemic coagulopathy in hospitalized patients with coronavirus disease 2019: A systematic review and meta-analysis. *Clinical and Applied Thrombosis/Hemostasis*, 2021. 27: p. 1076029620987629.
246. Ullah, W., et al., Safety and efficacy of hydroxychloroquine in COVID-19: a systematic review and meta-analysis. *Journal of clinical medicine research*, 2020. 12(8): p. 483.
247. Valk, S.J., et al., Convalescent plasma or hyperimmune immunoglobulin for people with COVID- 19: a rapid review. *Cochrane Database of Systematic Reviews*, 2020(5).
248. van Paassen, J., et al., Corticosteroid use in COVID-19 patients: a systematic review and meta-analysis on clinical outcomes. *Critical Care*, 2020. 24(1): p. 1-22.
249. Vargas, M., G. Servillo, and S. Einav, Lopinavir/ritonavir for the treatment of SARS, MERS and COVID-19: a systematic review. *Eur Rev Med Pharmacol Sci*, 2020. 24(16): p. 8592-605.
250. Vegivinti, C.T.R., et al., Remdesivir therapy in patients with COVID-19: A systematic review and meta-analysis of randomized controlled trials. *Annals of Medicine and Surgery*, 2021.
251. Venkatesulu, B.P., et al., The mechanistic rationale of drugs, primary endpoints, geographical distribution of clinical trials against severe acute respiratory syndrome-

**Comparative-effectiveness research of COVID-19 treatment: A rapid scoping review**

- related coronavirus- 2: A systematic review. *Journal of medical virology*, 2021. 93(2): p. 843-853.
252. Verdugo-Paiva, F., et al., Remdesivir for the treatment of COVID-19: a living systematic review. *medRxiv*, 2020.
253. Veronese, N., et al., Use of corticosteroids in coronavirus disease 2019 pneumonia: a systematic review of the literature. *Frontiers in medicine*, 2020. 7: p. 170.
254. Viswanatha, G.L., C.K.A. Male, and H. Shylaja, Efficacy and safety of tocilizumab in the management of COVID-19: A systematic review and meta-analysis of observational studies. *medRxiv*, 2021.
255. Vrachatis, D.A., et al., Impact of colchicine on mortality in patients with COVID-19. A meta-analysis. *Hellenic Journal of Cardiology*, 2021.
256. Wadaa-Allah, A., et al., Efficacy of the current investigational drugs for the treatment of COVID-19: a scoping review. *Annals of medicine*, 2021. 53(1): p. 318-334.
257. Walz, L., et al., Janus kinase-inhibitor and type I interferon ability to produce favorable clinical outcomes in COVID-19 patients: a systematic review and meta-analysis. *MedRxiv*, 2020.
258. Walz, L., et al., JAK-inhibitor and type I interferon ability to produce favorable clinical outcomes in COVID-19 patients: a systematic review and meta-analysis. *BMC infectious diseases*, 2021. 21(1): p. 1-10.
259. Wang, D., et al., Tocilizumab in patients with moderate or severe COVID-19: a randomized, controlled, open-label, multicenter trial. *Frontiers of medicine*, 2021: p. 1-9.
260. Wang, M., et al., Evaluation of current medical approaches for COVID-19: a systematic review and meta-analysis. *BMJ Supportive & Palliative Care*, 2021. 11(1): p. 45-52.
261. Wang, Y., et al., Effect of antiplatelet treatments on patients with COVID-19 infection: A systematic review and meta-analysis. *The American journal of emergency medicine*, 2021.
262. Wang, Y., et al., Convalescent plasma may be a possible treatment for COVID-19: a systematic review. *International immunopharmacology*, 2021. 91: p. 107262.
263. Welte, T., et al., Current evidence for COVID-19 therapies: a systematic literature review. *European Respiratory Review*, 2021. 30(159).
264. Wenjing, L., et al., Safety and efficacy of convalescent plasma therapy in severely and critically ill patients with COVID-19: a systematic review with meta-analysis. *Aging (Albany NY)*, 2021. 13(1): p. 1498.
265. Wijaya, I., R. Andhika, and I. Huang, The use of therapeutic-dose anticoagulation and its effect on mortality in patients with COVID-19: a systematic review. *Clinical and Applied Thrombosis/Hemostasis*, 2020. 26: p. 1076029620960797.
266. Wijaya, I., et al., The use of Janus Kinase inhibitors in hospitalized patients with COVID-19: Systematic review and meta-analysis. *Clinical epidemiology and global health*, 2021: p. 100755.
267. Wilt, T.J., et al., Remdesivir for adults with COVID-19: a living systematic review for American College of Physicians practice points. *Annals of internal medicine*, 2021. 174(2): p. 209-220.
268. Wooding, D.J. and H. Bach, Treatment of COVID-19 with convalescent plasma: lessons from past coronavirus outbreaks. *Clinical Microbiology and Infection*, 2020.

**Comparative-effectiveness research of COVID-19 treatment: A rapid scoping review**

269. Wu, L., et al., Comprehensive evaluation of the efficacy and safety of LPV/r drugs in the treatment of SARS and MERS to provide potential treatment options for COVID-19. *Aging (Albany NY)*, 2021. 13(8): p. 10833.
270. Xu, J., et al., The effect of prior ACEI/ARB treatment on COVID-19 susceptibility and outcome: a systematic review and meta-analysis. *Clinical Infectious Diseases*, 2020.
271. Yamaji, N., et al., Current Evidence of the Pharmacological Treatments for Novel Coronavirus Disease 2019 (COVID-19) A Scoping Review. *medRxiv*, 2020.
272. Yang, J.-W., et al., Corticosteroid administration for viral pneumonia: COVID-19 and beyond. *Clinical Microbiology and Infection*, 2020. 26(9): p. 1171-1177.
273. Yang, T.-H., et al., Systematic review and meta-analysis of the effectiveness and safety of hydroxychloroquine in treating COVID-19 patients. *Journal of the Chinese Medical Association*, 2021. 84(2): p. 233-241.
274. Yang, Z., et al., The effect of corticosteroid treatment on patients with coronavirus infection: a systematic review and meta-analysis. *Journal of Infection*, 2020. 81(1): p. e13-e20.
275. Ye, Z., et al., Efficacy and safety of corticosteroids in COVID-19 based on evidence for COVID-19, other coronavirus infections, influenza, community-acquired pneumonia and acute respiratory distress syndrome: a systematic review and meta-analysis. *Cmaj*, 2020. 192(27): p. E756-E767.
276. Yokoyama, Y., et al., Effect of remdesivir on patients with COVID-19: A network meta-analysis of randomized control trials. *Virus research*, 2020. 288: p. 198137.
277. Yousefifard, M., et al., Corticosteroids on the management of coronavirus disease 2019 (COVID-19): a systemic review and meta-analysis. *Iranian Journal of Public Health*, 2020. 49(8): p. 1411.
278. Yousefifard, M., et al., Antiviral therapy in management of COVID-19: a systematic review on current evidence. *Archives of academic emergency medicine*, 2020. 8(1).
279. Yousefifard, M., et al., Non-steroidal anti-inflammatory drugs in management of COVID-19; a systematic review on current evidence. *International Journal of Clinical Practice*, 2020. 74(9): p. e13557.
280. Zaffanello, M., et al., The use of convalescent plasma for pediatric patients with SARS-CoV-2: A systematic literature review. *Transfusion and Apheresis Science*, 2020: p. 103043.
281. Zang, Y., et al., Hydroxychloroquine use and progression or prognosis of COVID-19: a systematic review and meta-analysis. *Naunyn-Schmiedeberg's archives of pharmacology*, 2021. 394(4): p. 775-782.
282. Zeng, J., et al., What convalescent plasma in treating severe acute respiratory infections of viral aetiology can hint for COVID-19? Evidence from a meta-analysis. *Transfusion Clinique et Biologique*, 2021.
283. Zhan, Y., et al., Efficacy of corticosteroid in patients with COVID-19: A multi-center retrospective study and meta-analysis. *Journal of Medical Virology*, 2021. 93(7): p. 4292-4302.
284. Zhang, C., et al., A systematic review and network meta-analysis for COVID-19 treatments. *MedRxiv*, 2020.
285. Zhang, J., et al., Effectiveness of intravenous immunoglobulin for children with severe COVID-19: a rapid review. *Annals of translational medicine*, 2020. 8(10).



**Comparative-effectiveness research of COVID-19 treatment: A rapid scoping review**

286. Zhang, X., et al., Convalescent plasma in the treatment of severe covid-19: A systematic review and meta-analysis. *Iranian Journal of Public Health*, 2020. 49(11): p. 2022.
287. Zhao, M., et al., Tocilizumab for treating COVID-19: a systemic review and meta-analysis of retrospective studies. *European journal of clinical pharmacology*, 2021. 77(3): p. 311-319.
288. Zhong, H., et al., Efficacy and safety of current therapeutic options for COVID-19-lessons to be learnt from SARS and MERS epidemic: A systematic review and meta-analysis. *Pharmacological research*, 2020. 157: p. 104872.
289. Zuniga, R.A.A., et al., Clinical effectiveness of convalescent plasma in hospitalized patients with COVID-19: a systematic review and meta-analysis. *medRxiv*, 2021.

## Comparative-effectiveness research of COVID-19 treatment: A rapid scoping review

### Appendix 6. Additional details for the Results section

Figure A1. Word cloud of description of study participants

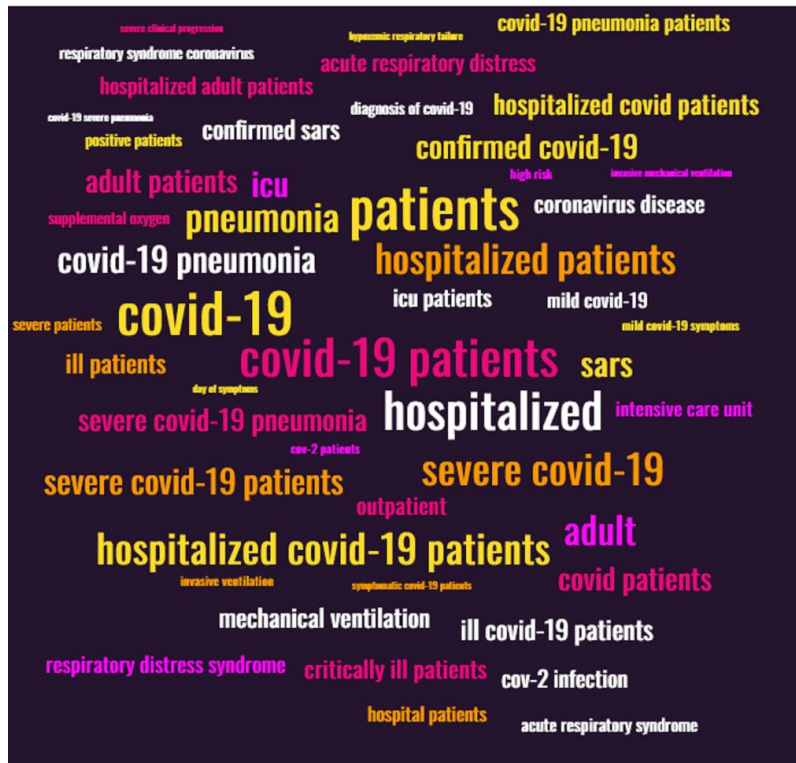

## Comparative-effectiveness research of COVID-19 treatment: A rapid scoping review

Table A1. Country of primary study conduct

| <b>Country</b>       | <b>Total</b> | <b>RCT</b> | <b>Non-RCT</b> |
|----------------------|--------------|------------|----------------|
| <b>Total</b>         | <b>616</b>   | <b>188</b> | <b>428</b>     |
| USA                  | 161 (26)     | 37 (20)    | 124 (29)       |
| China                | 107 (17)     | 27 (14)    | 80 (19)        |
| Italy                | 47 (8)       | 2 (1)      | 45 (11)        |
| Spain                | 41 (7)       | 3 (2)      | 38 (9)         |
| France               | 39 (6)       | 5 (3)      | 34 (8)         |
| India                | 23 (4)       | 15 (8)     | 8 (2)          |
| Iran                 | 21 (3)       | 15 (8)     | 6 (1)          |
| United Kingdom       | 21 (3)       | 19 (10)    | 2 (0)          |
| Brazil               | 17 (3)       | 13 (7)     | 4 (1)          |
| Turkey               | 12 (2)       | 1 (1)      | 11 (3)         |
| Mexico               | 11 (2)       | 6 (3)      | 5 (1)          |
| Argentina            | 10 (2)       | 7 (4)      | 3 (1)          |
| The Netherlands      | 8 (1)        | 2 (1)      | 6 (1)          |
| Greece               | 6 (1)        | 2 (1)      | 4 (1)          |
| Pakistan             | 6 (1)        | 4 (2)      | 2 (0)          |
| Russia               | 6 (1)        | 1 (1)      | 5 (1)          |
| Belgium              | 5 (1)        | 1 (1)      | 4 (1)          |
| Egypt                | 5 (1)        | 4 (2)      | 1 (0)          |
| Saudi Arabia         | 5 (1)        | 0 (0)      | 5 (1)          |
| Bangladesh           | 4 (1)        | 2 (1)      | 2 (0)          |
| Singapore            | 4 (1)        | 0 (0)      | 4 (1)          |
| South Korea          | 4 (1)        | 0 (0)      | 4 (1)          |
| Bahrain              | 3 (0)        | 2 (1)      | 1 (0)          |
| Canada               | 3 (0)        | 3 (2)      | 0 (0)          |
| Denmark              | 3 (0)        | 2 (1)      | 1 (0)          |
| Germany              | 3 (0)        | 1 (1)      | 2 (0)          |
| Iraq                 | 3 (0)        | 2 (1)      | 1 (0)          |
| Oman                 | 3 (0)        | 1 (1)      | 2 (0)          |
| Poland               | 3 (0)        | 0 (0)      | 3 (1)          |
| United Arab Emirates | 3 (0)        | 0 (0)      | 3 (1)          |
| Austria              | 2 (0)        | 0 (0)      | 2 (0)          |
| Chile                | 2 (0)        | 2 (1)      | 0 (0)          |
| Cuba                 | 2 (0)        | 1 (1)      | 1 (0)          |
| Ireland              | 2 (0)        | 0 (0)      | 2 (0)          |
| Israel               | 2 (0)        | 0 (0)      | 2 (0)          |
| Qatar                | 2 (0)        | 1 (1)      | 1 (0)          |
| Sweden               | 2 (0)        | 0 (0)      | 2 (0)          |
| Australia            | 1 (0)        | 1 (1)      | 0 (0)          |
| Columbia             | 1 (0)        | 1 (1)      | 0 (0)          |
| Hong Kong            | 1 (0)        | 0 (0)      | 1 (0)          |
| Indonesia            | 1 (0)        | 1 (1)      | 0 (0)          |
| Kuwait               | 1 (0)        | 0 (0)      | 1 (0)          |
| Nigeria              | 1 (0)        | 1 (1)      | 0 (0)          |

**Comparative-effectiveness research of COVID-19 treatment: A rapid scoping review**

| <b>Country</b>     | <b>Total</b> | <b>RCT</b> | <b>Non-RCT</b> |
|--------------------|--------------|------------|----------------|
| <b>Total</b>       | <b>616</b>   | <b>188</b> | <b>428</b>     |
| Norway             | 1 (0)        | 1 (1)      | 0 (0)          |
| Peru               | 1 (0)        | 0 (0)      | 1 (0)          |
| Philippines        | 1 (0)        | 0 (0)      | 1 (0)          |
| Romania            | 1 (0)        | 0 (0)      | 1 (0)          |
| Suriname           | 1 (0)        | 0 (0)      | 1 (0)          |
| Switzerland        | 1 (0)        | 0 (0)      | 1 (0)          |
| Taiwan             | 1 (0)        | 1 (1)      | 0 (0)          |
| Thailand           | 1 (0)        | 0 (0)      | 1 (0)          |
| WHO - 30 countries | 1 (0)        | 1 (1)      | 0 (0)          |

Notes: Values are numbers of primary studies and related percentages.

**Comparative-effectiveness research of COVID-19 treatment: A rapid scoping review**

Table A2. Treatment evaluated in primary studies

|                                 | <b>Total</b> | <b>RCT</b> | <b>Non-RCT</b> |
|---------------------------------|--------------|------------|----------------|
| <b>Total</b>                    | <b>630</b>   | <b>190</b> | <b>440</b>     |
| Tocilizumab                     | 87 (14%)     | 12 (6%)    | 75 (17%)       |
| Hydroxychloroquine              | 78 (12%)     | 22 (12%)   | 56 (13%)       |
| Convalescent Plasma             | 55 (9%)      | 15 (8%)    | 40 (9%)        |
| Steroid                         | 37 (6%)      | 1 (1%)     | 36 (8%)        |
| Lopinavir/Ritonavir             | 29 (5%)      | 5 (3%)     | 24 (5%)        |
| Methylprednisolone              | 26 (4%)      | 3 (2%)     | 23 (5%)        |
| Remdesivir                      | 25 (4%)      | 16 (8%)    | 9 (2%)         |
| Enoxaparin                      | 18 (3%)      | 1 (1%)     | 17 (4%)        |
| Hydroxychloroquine/Azithromycin | 18 (3%)      | 2 (1%)     | 16 (4%)        |
| Anakinra                        | 16 (3%)      | 2 (1%)     | 14 (3%)        |
| Dexamethasone                   | 16 (3%)      | 4 (2%)     | 12 (3%)        |
| Anticoagulant-Therapeutic       | 15 (2%)      | 2 (1%)     | 13 (3%)        |
| Azithromycin                    | 15 (2%)      | 6 (3%)     | 9 (2%)         |
| Anticoagulant-Prophylactic      | 11 (2%)      | 0 (0%)     | 11 (3%)        |
| Ivermectin                      | 11 (2%)      | 9 (5%)     | 2 (0%)         |
| Heparin                         | 9 (1%)       | 0 (0%)     | 9 (2%)         |
| Favipiravir                     | 8 (1%)       | 6 (3%)     | 2 (0%)         |
| Sarilumab                       | 8 (1%)       | 7 (4%)     | 1 (0%)         |
| Colchicine                      | 7 (1%)       | 4 (2%)     | 3 (1%)         |
| Glucocorticoids                 | 7 (1%)       | 0 (0%)     | 7 (2%)         |
| Bamlanivimab                    | 6 (1%)       | 4 (2%)     | 2 (0%)         |
| Chloroquine                     | 6 (1%)       | 2 (1%)     | 4 (1%)         |
| Intravenous Immunoglobulin      | 6 (1%)       | 4 (2%)     | 2 (0%)         |
| Mesenchymal Stem Cells          | 6 (1%)       | 4 (2%)     | 2 (0%)         |
| Steroid                         | 6 (1%)       | 0 (0%)     | 6 (1%)         |
| Thymosin-Alpha1                 | 6 (1%)       | 1 (1%)     | 5 (1%)         |

**Comparative-effectiveness research of COVID-19 treatment: A rapid scoping review**

|                                        | <b>Total</b> | <b>RCT</b> | <b>Non-RCT</b> |
|----------------------------------------|--------------|------------|----------------|
| <b>Total</b>                           | <b>630</b>   | <b>190</b> | <b>440</b>     |
| Vitamin C                              | 6 (1%)       | 4 (2%)     | 2 (0%)         |
| Antiviral                              | 5 (1%)       | 0 (0%)     | 5 (1%)         |
| Arbidol                                | 5 (1%)       | 2 (1%)     | 3 (1%)         |
| Aspirin                                | 5 (1%)       | 0 (0%)     | 5 (1%)         |
| Interferon                             | 5 (1%)       | 3 (2%)     | 2 (0%)         |
| Prednisone                             | 5 (1%)       | 1 (1%)     | 4 (1%)         |
| Statins                                | 5 (1%)       | 0 (0%)     | 5 (1%)         |
| Antibiotic                             | 4 (1%)       | 0 (0%)     | 4 (1%)         |
| Anticoagulant                          | 4 (1%)       | 0 (0%)     | 4 (1%)         |
| Hydrocortisone                         | 4 (1%)       | 2 (1%)     | 2 (0%)         |
| Lopinavir/Ritonavir/Hydroxychloroquine | 4 (1%)       | 0 (0%)     | 4 (1%)         |
| Ribavirin                              | 4 (1%)       | 0 (0%)     | 4 (1%)         |
| Therapeutic Plasma Exchange            | 4 (1%)       | 0 (0%)     | 4 (1%)         |
| Vitamin D                              | 4 (1%)       | 3 (2%)     | 1 (0%)         |
| Acei Arb                               | 3 (0%)       | 0 (0%)     | 3 (1%)         |
| Baricitinib                            | 3 (0%)       | 1 (1%)     | 2 (0%)         |
| Casirivimab/Imdevimab                  | 3 (0%)       | 2 (1%)     | 1 (0%)         |
| Famotidine                             | 3 (0%)       | 0 (0%)     | 3 (1%)         |
| Interferon-Alpha-2b                    | 3 (0%)       | 0 (0%)     | 3 (1%)         |
| Interferon Alpha-2b                    | 3 (0%)       | 1 (1%)     | 2 (0%)         |
| Lenzilumab                             | 3 (0%)       | 2 (1%)     | 1 (0%)         |
| Lopinavir/Ritonavir/Interferon-Alpha   | 3 (0%)       | 0 (0%)     | 3 (1%)         |
| Neutralizing Antibody                  | 3 (0%)       | 1 (1%)     | 2 (0%)         |
| Zinc Iv                                | 3 (0%)       | 3 (2%)     | 0 (0%)         |
| Acei Arb Statin                        | 2 (0%)       | 0 (0%)     | 2 (0%)         |
| Avifavir                               | 2 (0%)       | 2 (1%)     | 0 (0%)         |

**Comparative-effectiveness research of COVID-19 treatment: A rapid scoping review**

|                                                  | <b>Total</b> | <b>RCT</b> | <b>Non-RCT</b> |
|--------------------------------------------------|--------------|------------|----------------|
| <b>Total</b>                                     | <b>630</b>   | <b>190</b> | <b>440</b>     |
| Canakinumab                                      | 2 (0%)       | 0 (0%)     | 2 (0%)         |
| Ceftriaxone                                      | 2 (0%)       | 0 (0%)     | 2 (0%)         |
| Chlorpromazine                                   | 2 (0%)       | 0 (0%)     | 2 (0%)         |
| Corticosteroids/Tocilizumab                      | 2 (0%)       | 0 (0%)     | 2 (0%)         |
| Darunavir/Cobicistat                             | 2 (0%)       | 1 (1%)     | 1 (0%)         |
| Fondaparinux                                     | 2 (0%)       | 0 (0%)     | 2 (0%)         |
| Functional Inhibition Of Acid Sphingomyelinase   | 2 (0%)       | 0 (0%)     | 2 (0%)         |
| Haloperidol                                      | 2 (0%)       | 0 (0%)     | 2 (0%)         |
| Heparin-Prophylaxis                              | 2 (0%)       | 0 (0%)     | 2 (0%)         |
| Inhaled Budesonide                               | 2 (0%)       | 2 (1%)     | 0 (0%)         |
| Interferon Beta-1b                               | 2 (0%)       | 0 (0%)     | 2 (0%)         |
| Interferon Kappa/Trefoil Factor 2                | 2 (0%)       | 2 (1%)     | 0 (0%)         |
| Interferon Lambda-1a                             | 2 (0%)       | 2 (1%)     | 0 (0%)         |
| Interlukin-6 Inhibitors                          | 2 (0%)       | 0 (0%)     | 2 (0%)         |
| Itolizumab                                       | 2 (0%)       | 2 (1%)     | 0 (0%)         |
| Ivermectin/Doxycycline                           | 2 (0%)       | 2 (1%)     | 0 (0%)         |
| Leflunomide                                      | 2 (0%)       | 0 (0%)     | 2 (0%)         |
| Lopinavir                                        | 2 (0%)       | 2 (1%)     | 0 (0%)         |
| Lopinavir/Ritonavir/Azithromycine                | 2 (0%)       | 2 (1%)     | 0 (0%)         |
| Lopinavir/Ritonavir/Doxycycline                  | 2 (0%)       | 2 (1%)     | 0 (0%)         |
| Lopinavir/Ritonavir/Ribavirin/Interferon Beta-1b | 2 (0%)       | 1 (1%)     | 1 (0%)         |
| Mavrilimumab                                     | 2 (0%)       | 1 (1%)     | 1 (0%)         |
| Methylprednisolone/Tocilizumab                   | 2 (0%)       | 0 (0%)     | 2 (0%)         |
| Neuromuscular Blocking Agents                    | 2 (0%)       | 0 (0%)     | 2 (0%)         |
| Nitazoxanide                                     | 2 (0%)       | 2 (1%)     | 0 (0%)         |
| Oseltamivir                                      | 2 (0%)       | 0 (0%)     | 2 (0%)         |

**Comparative-effectiveness research of COVID-19 treatment: A rapid scoping review**

|                                                        | <b>Total</b> | <b>RCT</b> | <b>Non-RCT</b> |
|--------------------------------------------------------|--------------|------------|----------------|
| <b>Total</b>                                           | <b>630</b>   | <b>190</b> | <b>440</b>     |
| Prednisolone                                           | 2 (0%)       | 0 (0%)     | 2 (0%)         |
| Ribavirin/Interferon-Alpha                             | 2 (0%)       | 0 (0%)     | 2 (0%)         |
| Statin                                                 | 2 (0%)       | 0 (0%)     | 2 (0%)         |
| Stem Cell Nebulization                                 | 2 (0%)       | 0 (0%)     | 2 (0%)         |
| Steroid-Pulse                                          | 2 (0%)       | 0 (0%)     | 2 (0%)         |
| Tocilizumab/Methylprednisolone                         | 2 (0%)       | 0 (0%)     | 2 (0%)         |
| Tocilizumab/Steroid                                    | 2 (0%)       | 0 (0%)     | 2 (0%)         |
| Umifenovir                                             | 2 (0%)       | 0 (0%)     | 2 (0%)         |
| Vitamin C/Zinc                                         | 2 (0%)       | 2 (1%)     | 0 (0%)         |
| Acyclovir                                              | 1 (0%)       | 0 (0%)     | 1 (0%)         |
| Amantadine                                             | 1 (0%)       | 0 (0%)     | 1 (0%)         |
| Amoxicillin                                            | 1 (0%)       | 0 (0%)     | 1 (0%)         |
| Anakinra/Intravenous Immunoglobulin                    | 1 (0%)       | 0 (0%)     | 1 (0%)         |
| Anakinra/Methylprednisolone                            | 1 (0%)       | 0 (0%)     | 1 (0%)         |
| Antiviral/Antiviral/Antibiotics                        | 1 (0%)       | 0 (0%)     | 1 (0%)         |
| Apixaban-Prophylaxis                                   | 1 (0%)       | 0 (0%)     | 1 (0%)         |
| Apixaban-Therapeutic                                   | 1 (0%)       | 0 (0%)     | 1 (0%)         |
| Aprepitant                                             | 1 (0%)       | 1 (1%)     | 0 (0%)         |
| Arbidol/Hydroxychloroquine/Lopinavir/Ritonavir         | 1 (0%)       | 0 (0%)     | 1 (0%)         |
| Artemisinin-Piperaquine                                | 1 (0%)       | 0 (0%)     | 1 (0%)         |
| Auxora                                                 | 1 (0%)       | 1 (1%)     | 0 (0%)         |
| Azithromycin/Hydroxychloroquine                        | 1 (0%)       | 0 (0%)     | 1 (0%)         |
| Azithromycin/Prednisolone/Naproxen/Lopinavir/Ritonavir | 1 (0%)       | 0 (0%)     | 1 (0%)         |
| Azvudine                                               | 1 (0%)       | 1 (1%)     | 0 (0%)         |
| Bacillus Calmette–Guérin Vaccine                       | 1 (0%)       | 1 (1%)     | 0 (0%)         |
| Baloxavir Marboxil                                     | 1 (0%)       | 1 (1%)     | 0 (0%)         |



**Comparative-effectiveness research of COVID-19 treatment: A rapid scoping review**

|                                                     | <b>Total</b> | <b>RCT</b> | <b>Non-RCT</b> |
|-----------------------------------------------------|--------------|------------|----------------|
| <b>Total</b>                                        | <b>630</b>   | <b>190</b> | <b>440</b>     |
| Bamlanivimab/Etesevimab                             | 1 (0%)       | 1 (1%)     | 0 (0%)         |
| Baricitinib/Remdesivir                              | 1 (0%)       | 1 (1%)     | 0 (0%)         |
| Berinerit                                           | 1 (0%)       | 0 (0%)     | 1 (0%)         |
| Betamethasone                                       | 1 (0%)       | 1 (1%)     | 0 (0%)         |
| Bevacizumab                                         | 1 (0%)       | 0 (0%)     | 1 (0%)         |
| Bromhexine/Hydrochloride                            | 1 (0%)       | 1 (1%)     | 0 (0%)         |
| Bromhexine/Hydrochloride/Antiviral                  | 1 (0%)       | 1 (1%)     | 0 (0%)         |
| Bromhexine/Spirolactone                             | 1 (0%)       | 0 (0%)     | 1 (0%)         |
| Camostat Mesilate                                   | 1 (0%)       | 1 (1%)     | 0 (0%)         |
| Cerc-002                                            | 1 (0%)       | 1 (1%)     | 0 (0%)         |
| Choloroquine                                        | 1 (0%)       | 1 (1%)     | 0 (0%)         |
| Cigb-325                                            | 1 (0%)       | 1 (1%)     | 0 (0%)         |
| Clarithromycin                                      | 1 (0%)       | 0 (0%)     | 1 (0%)         |
| Corticosteroid/Tocilizumab                          | 1 (0%)       | 0 (0%)     | 1 (0%)         |
| Corticosteroid/Lopinavir/Ritonavir/Interferon Alpha | 1 (0%)       | 0 (0%)     | 1 (0%)         |
| Corticosteroid/Ns-Immunosuppresant                  | 1 (0%)       | 0 (0%)     | 1 (0%)         |
| Corticosteroids/Anakinra                            | 1 (0%)       | 0 (0%)     | 1 (0%)         |
| Corticosteroids/Baricitinib                         | 1 (0%)       | 0 (0%)     | 1 (0%)         |
| Cotrimoxazole                                       | 1 (0%)       | 0 (0%)     | 1 (0%)         |
| Cyclooxygenase-2                                    | 1 (0%)       | 0 (0%)     | 1 (0%)         |
| Cyclosporine A                                      | 1 (0%)       | 0 (0%)     | 1 (0%)         |
| Dexamethasone/Tofacitinib                           | 1 (0%)       | 0 (0%)     | 1 (0%)         |
| Diphenhydramine/Ammonium Chloride                   | 1 (0%)       | 1 (1%)     | 0 (0%)         |
| Doxycycline                                         | 1 (0%)       | 1 (1%)     | 0 (0%)         |
| Dutasteride                                         | 1 (0%)       | 1 (1%)     | 0 (0%)         |
| Eculizumab                                          | 1 (0%)       | 0 (0%)     | 1 (0%)         |

**Comparative-effectiveness research of COVID-19 treatment: A rapid scoping review**

|                                                                                           | <b>Total</b> | <b>RCT</b> | <b>Non-RCT</b> |
|-------------------------------------------------------------------------------------------|--------------|------------|----------------|
| <b>Total</b>                                                                              | <b>630</b>   | <b>190</b> | <b>440</b>     |
| Epoprostenol - Aerosolized                                                                | 1 (0%)       | 0 (0%)     | 1 (0%)         |
| Equine Polyclonal Antibodies                                                              | 1 (0%)       | 1 (1%)     | 0 (0%)         |
| Favipiravir/Chloroquine Hydroxychloroquine/Lopinavir/<br>Ritonavir Or Darunavir/Ritonavir | 1 (0%)       | 0 (0%)     | 1 (0%)         |
| Favipiravir/Chloroquine Hydroxychloroquine/Lopinavir/<br>Ritonavir Darunavir/Ritonavir    | 1 (0%)       | 0 (0%)     | 1 (0%)         |
| Favipiravir/Interferon Beta-1b                                                            | 1 (0%)       | 1 (1%)     | 0 (0%)         |
| Firazyr                                                                                   | 1 (0%)       | 0 (0%)     | 1 (0%)         |
| Flash Frozen Plasma                                                                       | 1 (0%)       | 1 (1%)     | 0 (0%)         |
| Fluticasone Spray/Triamcinolone                                                           | 1 (0%)       | 0 (0%)     | 1 (0%)         |
| Fluvoxamine                                                                               | 1 (0%)       | 1 (1%)     | 0 (0%)         |
| Glucocorticoids/Interferon                                                                | 1 (0%)       | 0 (0%)     | 1 (0%)         |
| Hydroxychloroquine Or Chloroquine                                                         | 1 (0%)       | 0 (0%)     | 1 (0%)         |
| Hydroxychloroquine/Lopinavir/Ritonavir                                                    | 1 (0%)       | 0 (0%)     | 1 (0%)         |
| Hydroxychloroquine/Lopinavir/Ritonavir/Azithromycin                                       | 1 (0%)       | 1 (1%)     | 0 (0%)         |
| Hydroxychloroquine/Favipiravir                                                            | 1 (0%)       | 0 (0%)     | 1 (0%)         |
| Hydroxychloroquine/Lopinavir/Ritonavir                                                    | 1 (0%)       | 0 (0%)     | 1 (0%)         |
| Hydroxyzine                                                                               | 1 (0%)       | 0 (0%)     | 1 (0%)         |
| Inhaled Adenosine                                                                         | 1 (0%)       | 0 (0%)     | 1 (0%)         |
| Inhaled Corticosteroid                                                                    | 1 (0%)       | 0 (0%)     | 1 (0%)         |
| Inhaled Nitric Oxide                                                                      | 1 (0%)       | 1 (1%)     | 0 (0%)         |
| Interferon-B 1a/Lopinavir/Ritonavir                                                       | 1 (0%)       | 0 (0%)     | 1 (0%)         |
| Interferon Alpha-2b/Arbidol                                                               | 1 (0%)       | 0 (0%)     | 1 (0%)         |
| Interferon Alpha-2b/Lopinavir/Ritonavir                                                   | 1 (0%)       | 0 (0%)     | 1 (0%)         |
| Interferon Beta-1a                                                                        | 1 (0%)       | 1 (1%)     | 0 (0%)         |
| Itraconazole                                                                              | 1 (0%)       | 1 (1%)     | 0 (0%)         |
| Ivermectin/Azithromycin                                                                   | 1 (0%)       | 0 (0%)     | 1 (0%)         |

**Comparative-effectiveness research of COVID-19 treatment: A rapid scoping review**

|                                                                   | <b>Total</b> | <b>RCT</b> | <b>Non-RCT</b> |
|-------------------------------------------------------------------|--------------|------------|----------------|
| <b>Total</b>                                                      | <b>630</b>   | <b>190</b> | <b>440</b>     |
| Leflunomide/Interferon Alpha 2a                                   | 1 (0%)       | 1 (1%)     | 0 (0%)         |
| Levamisole                                                        | 1 (0%)       | 1 (1%)     | 0 (0%)         |
| Levofloxacin                                                      | 1 (0%)       | 0 (0%)     | 1 (0%)         |
| Linezolid                                                         | 1 (0%)       | 0 (0%)     | 1 (0%)         |
| Lopinavir/Hydroxychloroquine                                      | 1 (0%)       | 0 (0%)     | 1 (0%)         |
| Lopinavir/Ritonavir Or Hydroxychloroquine+Prednisone              | 1 (0%)       | 0 (0%)     | 1 (0%)         |
| Lopinavir/Ritonavir/Arbidol                                       | 1 (0%)       | 0 (0%)     | 1 (0%)         |
| Lopinavir/Ritonavir/Chloroquine                                   | 1 (0%)       | 0 (0%)     | 1 (0%)         |
| Lopinavir/Ritonavir/Interferon                                    | 1 (0%)       | 0 (0%)     | 1 (0%)         |
| Lopinavir/Ritonavir/Interferon-Alpha/Abidor Ribavirin Cholroquine | 1 (0%)       | 0 (0%)     | 1 (0%)         |
| Lopinavir/Ritonavir/Interferon Beta-2b                            | 1 (0%)       | 0 (0%)     | 1 (0%)         |
| Lopinavir/Ritonavir/Interferon/Arbidol                            | 1 (0%)       | 0 (0%)     | 1 (0%)         |
| Lopinavir/Ritonavir/Novaferon                                     | 1 (0%)       | 0 (0%)     | 1 (0%)         |
| Lopinavir/Ritonavir/Novaferon/Interferon                          | 1 (0%)       | 0 (0%)     | 1 (0%)         |
| Losartan                                                          | 1 (0%)       | 1 (1%)     | 0 (0%)         |
| Meplazumab                                                        | 1 (0%)       | 0 (0%)     | 1 (0%)         |
| Meropenem                                                         | 1 (0%)       | 0 (0%)     | 1 (0%)         |
| Mesenchymal Stromal Cells                                         | 1 (0%)       | 0 (0%)     | 1 (0%)         |
| Methylprednisolone/Dexamethasone                                  | 1 (0%)       | 0 (0%)     | 1 (0%)         |
| Methylprednisolone/Ivig                                           | 1 (0%)       | 1 (1%)     | 0 (0%)         |
| Multi-Mechanism Approach                                          | 1 (0%)       | 0 (0%)     | 1 (0%)         |
| Nebulised Interferon Beta-1a                                      | 1 (0%)       | 1 (1%)     | 0 (0%)         |
| Nitazoxanide/Azithromycin                                         | 1 (0%)       | 1 (1%)     | 0 (0%)         |
| Nitazoxanide/Doxycycline                                          | 1 (0%)       | 1 (1%)     | 0 (0%)         |
| Olokizumab                                                        | 1 (0%)       | 0 (0%)     | 1 (0%)         |

**Comparative-effectiveness research of COVID-19 treatment: A rapid scoping review**

|                                                          | <b>Total</b> | <b>RCT</b> | <b>Non-RCT</b> |
|----------------------------------------------------------|--------------|------------|----------------|
| <b>Total</b>                                             | <b>630</b>   | <b>190</b> | <b>440</b>     |
| Opaganib                                                 | 1 (0%)       | 0 (0%)     | 1 (0%)         |
| Otilimab                                                 | 1 (0%)       | 1 (1%)     | 0 (0%)         |
| Pentoxifylline                                           | 1 (0%)       | 1 (1%)     | 0 (0%)         |
| Pipamperone And Citalopram                               | 1 (0%)       | 1 (1%)     | 0 (0%)         |
| Piperacillin                                             | 1 (0%)       | 0 (0%)     | 1 (0%)         |
| Polymerized-Collagen                                     | 1 (0%)       | 1 (1%)     | 0 (0%)         |
| Poractant Alfa                                           | 1 (0%)       | 0 (0%)     | 1 (0%)         |
| Progesterone                                             | 1 (0%)       | 1 (1%)     | 0 (0%)         |
| Prophylactic Anticoagulant                               | 1 (0%)       | 0 (0%)     | 1 (0%)         |
| Proxalutamide                                            | 1 (0%)       | 1 (1%)     | 0 (0%)         |
| Pyridostigmine                                           | 1 (0%)       | 1 (1%)     | 0 (0%)         |
| Recombinant Interleukin-2                                | 1 (0%)       | 0 (0%)     | 1 (0%)         |
| Remdesivir/Corticosteroid                                | 1 (0%)       | 0 (0%)     | 1 (0%)         |
| Ribavarin/Lopinavir/Ritonavir/Interferon-Alpha           | 1 (0%)       | 0 (0%)     | 1 (0%)         |
| Ribavirin/Arbidol/Hydroxichloroquine/Lopinavir/Ritonavir | 1 (0%)       | 0 (0%)     | 1 (0%)         |
| Ribavirin/Hydroxichloroquine/Lopinavir/Ritonavir         | 1 (0%)       | 0 (0%)     | 1 (0%)         |
| Rimantadine                                              | 1 (0%)       | 0 (0%)     | 1 (0%)         |
| Ruxolitinib                                              | 1 (0%)       | 0 (0%)     | 1 (0%)         |
| Sofosbuvir/Daclatasvir                                   | 1 (0%)       | 1 (1%)     | 0 (0%)         |
| Sofosbuvir/Daclatasvir/Hydroxychloroquine                | 1 (0%)       | 1 (1%)     | 0 (0%)         |
| Sofosbuvir/Ledipasvir                                    | 1 (0%)       | 1 (1%)     | 0 (0%)         |
| Soludexide                                               | 1 (0%)       | 1 (1%)     | 0 (0%)         |
| Sulodexide                                               | 1 (0%)       | 1 (1%)     | 0 (0%)         |
| Telmisartan                                              | 1 (0%)       | 1 (1%)     | 0 (0%)         |
| Theophylline/Pentoxifylline                              | 1 (0%)       | 0 (0%)     | 1 (0%)         |
| Tocilizumab/Convalescent Plasma                          | 1 (0%)       | 0 (0%)     | 1 (0%)         |

**Comparative-effectiveness research of COVID-19 treatment: A rapid scoping review**

|                                           | <b>Total</b> | <b>RCT</b> | <b>Non-RCT</b> |
|-------------------------------------------|--------------|------------|----------------|
| <b>Total</b>                              | <b>630</b>   | <b>190</b> | <b>440</b>     |
| Tocilizumab/Favipiravir                   | 1 (0%)       | 1 (1%)     | 0 (0%)         |
| Toxilizumab/Steroids/Anakinra/Baricitinib | 1 (0%)       | 0 (0%)     | 1 (0%)         |
| Triazavirin                               | 1 (0%)       | 1 (1%)     | 0 (0%)         |
| Vermeectin/Doxycycline                    | 1 (0%)       | 1 (1%)     | 0 (0%)         |
| Vilobelimab                               | 1 (0%)       | 1 (1%)     | 0 (0%)         |
| Vitamin D/Magnesium/Vitamin B12           | 1 (0%)       | 0 (0%)     | 1 (0%)         |
| Vitamins/Dietary Supplements              | 1 (0%)       | 0 (0%)     | 1 (0%)         |
| Zanamivir                                 | 1 (0%)       | 0 (0%)     | 1 (0%)         |

**Comparative-effectiveness research of COVID-19 treatment: A rapid scoping review**

Table A3. Treatment type of single treatment

|                                 | <b>Total</b> | <b>RCT</b> | <b>Non-RCT</b> |
|---------------------------------|--------------|------------|----------------|
| <b>Total</b>                    | <b>711</b>   | <b>202</b> | <b>509</b>     |
| Non-Steroidal Immunosuppressant | 126 (18%)    | 27 (13%)   | 99 (19%)       |
| Steroid                         | 110 (15%)    | 15 (7%)    | 95 (19%)       |
| Antiviral                       | 97 (14%)     | 40 (20%)   | 57 (11%)       |
| Antimalaria                     | 87 (12%)     | 25 (12%)   | 62 (12%)       |
| Anticoagulant                   | 66 (5%)      | 5 (3%)     | 61 (12%)       |
| Anticoagulant-Therapeutic       | 17 (2%)      | 2 (1%)     | 15 (3%)        |
| Anticoagulant-Prophylactic      | 14 (2%)      | 0 (0%)     | 14 (3%)        |
| Convalescent Plasma             | 56 (8%)      | 16 (8%)    | 40 (8%)        |
| Antibiotic                      | 29 (4%)      | 7 (3%)     | 22 (4%)        |
| Anti- Inflammatory              | 20 (3%)      | 8 (4%)     | 12 (2%)        |
| Interferon Therapy              | 16 (2%)      | 7 (3%)     | 9 (2%)         |
| Antiparasitic                   | 14 (2%)      | 12 (6%)    | 2 (0%)         |
| Immunomodulator                 | 14 (2%)      | 4 (2%)     | 10 (2%)        |
| Neutralizing Antibodies         | 13 (2%)      | 7 (3%)     | 6 (1%)         |
| Mesenchymal Stem Cells          | 9 (1%)       | 4 (2%)     | 5 (1%)         |
| Statin                          | 7 (1%)       | 0 (0%)     | 7 (1%)         |
| Intravenous Immunoglobulin      | 6 (1%)       | 4 (2%)     | 2 (0%)         |
| Vitamin C                       | 6 (1%)       | 4 (2%)     | 2 (0%)         |
| Antihistamine                   | 4 (1%)       | 0 (0%)     | 4 (1%)         |
| Antipsychotic                   | 4 (1%)       | 0 (0%)     | 4 (1%)         |
| Vitamin D                       | 4 (1%)       | 3 (1%)     | 1 (0%)         |

## Comparative-effectiveness research of COVID-19 treatment: A rapid scoping review

Table A4. Treatment type of combination treatment

| <b>Total</b>                                             | <b>Total<br/>116</b> | <b>RCT<br/>29</b> | <b>Non-RCT<br/>87</b> |
|----------------------------------------------------------|----------------------|-------------------|-----------------------|
| Antimalaria/Antibiotic                                   | 19 (16%)             | 2 (7%)            | 17 (20%)              |
| Steroid/NS-Immunosuppressant                             | 10 (9%)              | 0 (0%)            | 10 (11%)              |
| Antimalaria/Antiviral/Antiviral                          | 8 (7%)               | 1 (3%)            | 7 (8%)                |
| Antiviral/Antiviral                                      | 5 (4%)               | 3 (10%)           | 2 (2%)                |
| Antiviral/Interferon                                     | 5 (4%)               | 0 (0%)            | 5 (6%)                |
| Antimalaria/Antiviral                                    | 4 (3%)               | 0 (0%)            | 4 (5%)                |
| Antimalaria/Antiviral/Antibiotic                         | 4 (3%)               | 4 (14%)           | 0 (0%)                |
| Antiparasitic/Antibiotic                                 | 4 (3%)               | 3 (10%)           | 1 (1%)                |
| Antiviral/Antiviral/Antiviral                            | 4 (3%)               | 0 (0%)            | 4 (5%)                |
| Antiviral/Antiviral/Antiviral/Interferon                 | 4 (3%)               | 0 (0%)            | 4 (5%)                |
| Antiviral/NS-Immunosuppressant                           | 4 (3%)               | 3 (10%)           | 1 (1%)                |
| NS-Immunosuppressant/Steroid                             | 4 (3%)               | 0 (0%)            | 4 (5%)                |
| ACEI/ARB                                                 | 3 (3%)               | 0 (0%)            | 3 (3%)                |
| Antiviral/Antibiotic                                     | 3 (3%)               | 2 (7%)            | 1 (1%)                |
| Antiviral/Antiviral/Interferon                           | 3 (3%)               | 1 (3%)            | 2 (2%)                |
| ACEI/ARB/Statin                                          | 2 (2%)               | 0 (0%)            | 2 (2%)                |
| Antimalaria/Antiviral/NS-Immunosuppressant               | 2 (2%)               | 0 (0%)            | 2 (2%)                |
| Antiviral/Anti-Inflammatory                              | 2 (2%)               | 2 (7%)            | 0 (0%)                |
| Steroid/Steroid                                          | 2 (2%)               | 0 (0%)            | 2 (2%)                |
| Vitamin C/Zinc                                           | 2 (2%)               | 2 (7%)            | 0 (0%)                |
| Anticoagulant/Ns-Immunosuppressant                       | 1 (1%)               | 0 (0%)            | 1 (1%)                |
| Antihistamine/Disinfectant                               | 1 (1%)               | 1 (3%)            | 0 (0%)                |
| Antimalaria/Mucolytic                                    | 2 (2%)               | 1 (3%)            | 1 (1%)                |
| Antimalaria/Antiviral/Antiviral/Antibiotic               | 1 (1%)               | 1 (3%)            | 0 (0%)                |
| Antimalaria/Antiviral/Antiviral/Antiviral                | 1 (1%)               | 0 (0%)            | 1 (1%)                |
| Antimalaria/Antiviral/Antiviral/Interferon               | 1 (1%)               | 0 (0%)            | 1 (1%)                |
| Antimalaria/Antiviral/Mucolytic                          | 1 (1%)               | 1 (3%)            | 0 (0%)                |
| Antiviral/Antiviral/Antibiotic/Anti-Inflammatory/Steroid | 1 (1%)               | 0 (0%)            | 1 (1%)                |
| Antiviral/Antiviral/Antimalaria/Steroid                  | 1 (1%)               | 0 (0%)            | 1 (1%)                |
| Antiviral/Immunomodulator                                | 1 (1%)               | 1 (3%)            | 0 (0%)                |
| Antiviral/Interferon/Steroid                             | 1 (1%)               | 0 (0%)            | 1 (1%)                |
| Antiviral/Steroid                                        | 1 (1%)               | 0 (0%)            | 1 (1%)                |
| Bronchodilator/Hemorrhologic Agent                       | 1 (1%)               | 0 (0%)            | 1 (1%)                |
| Mucolytic/Diuretic                                       | 1 (1%)               | 0 (0%)            | 1 (1%)                |
| NS-Immunosuppressant/Convalescent Plasma                 | 1 (1%)               | 0 (0%)            | 1 (1%)                |
| NS-Immunosuppressants/IVIG                               | 1 (1%)               | 0 (0%)            | 1 (1%)                |
| Steroid/Anti-Inflammatory                                | 1 (1%)               | 0 (0%)            | 1 (1%)                |
| Steroid/Interferon                                       | 1 (1%)               | 0 (0%)            | 1 (1%)                |
| Steroid/IVIG                                             | 1 (1%)               | 1 (3%)            | 0 (0%)                |
| Vitamin D/Magnesium/Vitamin B12                          | 1 (1%)               | 0 (0%)            | 1 (1%)                |

**Comparative-effectiveness research of COVID-19 treatment: A rapid scoping review**

|                              | <b>Total</b> | <b>RCT</b> | <b>Non-RCT</b> |
|------------------------------|--------------|------------|----------------|
| <b>Total</b>                 | <b>116</b>   | <b>29</b>  | <b>87</b>      |
| Vitamins/Dietary Supplements | 1 (1%)       | 0 (0%)     | 1 (1%)         |

Note: NS-immunosuppressant: non-steroidal immunosuppressant. ACEI/ARB: angiotensin-converting enzyme (ACE) inhibitor and an angiotensin receptor blocker (ARB). IVIG: Intravenous immune globulin.



## Comparative-effectiveness research of COVID-19 treatment: A rapid scoping review

Table A5. Country of knowledge synthesis conduct

|                 | <b>Total (n = 299)</b> | <b>With protocol (n = 88)</b> | <b>Without protocol (n = 211)</b> |
|-----------------|------------------------|-------------------------------|-----------------------------------|
| United States   | 57 (19%)               | 13 (15%)                      | 44 (21%)                          |
| China           | 40 (13%)               | 13 (15%)                      | 27 (13%)                          |
| India           | 34 (11%)               | 12 (14%)                      | 22 (10%)                          |
| Iran            | 18 (6%)                | 3 (3%)                        | 15 (7%)                           |
| United Kingdom  | 18 (6%)                | 3 (3%)                        | 15 (7%)                           |
| Saudi Arabia    | 13 (4%)                | 1 (1%)                        | 12 (6%)                           |
| Canada          | 12 (4%)                | 5 (6%)                        | 7 (3%)                            |
| Italy           | 12 (4%)                | 8 (9%)                        | 4 (2%)                            |
| Indonesia       | 9 (3%)                 | 2 (2%)                        | 7 (3%)                            |
| Malaysia        | 7 (2%)                 | 0 (0%)                        | 7 (3%)                            |
| Egypt           | 5 (2%)                 | 2 (2%)                        | 3 (1%)                            |
| France          | 5 (2%)                 | 3 (3%)                        | 2 (1%)                            |
| Peru            | 5 (2%)                 | 1 (1%)                        | 4 (2%)                            |
| Taiwan          | 5 (2%)                 | 1 (1%)                        | 4 (2%)                            |
| Australia       | 4 (1%)                 | 1 (1%)                        | 3 (1%)                            |
| Brazil          | 4 (1%)                 | 1 (1%)                        | 3 (1%)                            |
| Chile           | 4 (1%)                 | 4 (5%)                        | 0 (0%)                            |
| Japan           | 4 (1%)                 | 2 (2%)                        | 2 (1%)                            |
| Nepal           | 4 (1%)                 | 0 (0%)                        | 4 (2%)                            |
| Spain           | 4 (1%)                 | 1 (1%)                        | 3 (1%)                            |
| Bangladesh      | 3 (1%)                 | 0 (0%)                        | 3 (1%)                            |
| Greece          | 3 (1%)                 | 1 (1%)                        | 2 (1%)                            |
| Korea           | 3 (1%)                 | 1 (1%)                        | 2 (1%)                            |
| Pakistan        | 3 (1%)                 | 0 (0%)                        | 3 (1%)                            |
| The Netherlands | 3 (1%)                 | 1 (1%)                        | 2 (1%)                            |
| Denmark         | 2 (1%)                 | 1 (1%)                        | 1 (0%)                            |
| Germany         | 2 (1%)                 | 2 (2%)                        | 0 (0%)                            |
| Israel          | 2 (1%)                 | 1 (1%)                        | 1 (0%)                            |
| Lebanon         | 2 (1%)                 | 0 (0%)                        | 2 (1%)                            |
| Mexico          | 2 (1%)                 | 2 (2%)                        | 0 (0%)                            |
| Thailand        | 2 (1%)                 | 2 (2%)                        | 0 (0%)                            |
| Switzerland     | 1 (0%)                 | 0 (0%)                        | 1 (0%)                            |
| Tunisia         | 1 (0%)                 | 0 (0%)                        | 1 (0%)                            |
| Nigeria         | 1 (0%)                 | 1 (1%)                        | 0 (0%)                            |
| Portugal        | 1 (0%)                 | 0 (0%)                        | 1 (0%)                            |
| Qatar           | 1 (0%)                 | 0 (0%)                        | 1 (0%)                            |
| Romania         | 1 (0%)                 | 0 (0%)                        | 1 (0%)                            |
| Sweden          | 1 (0%)                 | 0 (0%)                        | 1 (0%)                            |
| Turkey          | 1 (0%)                 | 0 (0%)                        | 1 (0%)                            |

## Comparative-effectiveness research of COVID-19 treatment: A rapid scoping review

Table A6. Treatment evaluated in knowledge syntheses

|                                                              | <b>Total (n = 518)</b> | <b>With Protocol (n = 152)</b> | <b>Without Protocol (n = 366)</b> |
|--------------------------------------------------------------|------------------------|--------------------------------|-----------------------------------|
| Hydroxychloroquine                                           | 58 (11%)               | 15 (10%)                       | 43 (12%)                          |
| Remdesivir                                                   | 39 (8%)                | 11 (7%)                        | 28 (8%)                           |
| Tocilizumab                                                  | 35 (7%)                | 10 (7%)                        | 25 (7%)                           |
| Corticosteroid                                               | 35 (7%)                | 10 (7%)                        | 25 (7%)                           |
| Convalescent Plasma                                          | 33 (6%)                | 10 (7%)                        | 23 (6%)                           |
| Lopinavir-Ritonair                                           | 24 (5%)                | 8 (5%)                         | 16 (4%)                           |
| Chloroquine                                                  | 19 (4%)                | 6 (4%)                         | 13 (4%)                           |
| Hydroxychloroquine/Azithromycin                              | 14 (3%)                | 1 (1%)                         | 13 (4%)                           |
| Antivirals                                                   | 12 (2%)                | 4 (3%)                         | 8 (2%)                            |
| Anticoagulant                                                | 11 (2%)                | 2 (1%)                         | 9 (2%)                            |
| Azithromycin                                                 | 11 (2%)                | 3 (2%)                         | 8 (2%)                            |
| Favipiravir                                                  | 10 (2%)                | 1 (1%)                         | 9 (2%)                            |
| Hydroxychloroquine/Chloroquine                               | 10 (2%)                | 4 (3%)                         | 6 (2%)                            |
| Colchicine                                                   | 9 (2%)                 | 2 (1%)                         | 7 (2%)                            |
| Dexamethasone                                                | 9 (2%)                 | 1 (1%)                         | 8 (2%)                            |
| Arbidol                                                      | 7 (1%)                 | 1 (1%)                         | 6 (2%)                            |
| Invermectin                                                  | 7 (1%)                 | 3 (2%)                         | 4 (1%)                            |
| Glucocorticoid                                               | 7 (1%)                 | 3 (2%)                         | 4 (1%)                            |
| Acei/Arb                                                     | 6 (1%)                 | 4 (3%)                         | 2 (1%)                            |
| Therapeutic Anticoagulant                                    | 5 (1%)                 | 2 (1%)                         | 3 (1%)                            |
| Prophylactic Anticoagulant                                   | 4 (1%)                 | 3 (2%)                         | 1 (0%)                            |
| Anakinra                                                     | 4 (1%)                 | 3 (2%)                         | 1 (0%)                            |
| Famotidine                                                   | 4 (1%)                 | 1 (1%)                         | 3 (1%)                            |
| Jak-Inhibitors                                               | 4 (1%)                 | 2 (1%)                         | 2 (1%)                            |
| Sarilumab                                                    | 4 (1%)                 | 4 (3%)                         | 0 (0%)                            |
| Antibiotics                                                  | 3 (1%)                 | 1 (1%)                         | 2 (1%)                            |
| Antimalaria                                                  | 3 (1%)                 | 1 (1%)                         | 2 (1%)                            |
| Chloroquine/Hcq/Azithromycin                                 | 3 (1%)                 | 3 (2%)                         | 0 (0%)                            |
| Immunomodulation Treatment                                   | 3 (1%)                 | 1 (1%)                         | 2 (1%)                            |
| Interferon-Beta                                              | 3 (1%)                 | 1 (1%)                         | 2 (1%)                            |
| Intravenous Immunoglobulin                                   | 3 (1%)                 | 1 (1%)                         | 2 (1%)                            |
| Methylprednisolone                                           | 3 (1%)                 | 0 (0%)                         | 3 (1%)                            |
| Statins                                                      | 3 (1%)                 | 0 (0%)                         | 3 (1%)                            |
| Umifenovir                                                   | 3 (1%)                 | 0 (0%)                         | 3 (1%)                            |
| Vitamin D                                                    | 3 (1%)                 | 1 (1%)                         | 2 (1%)                            |
| Antiplatelets                                                | 2 (0%)                 | 1 (1%)                         | 1 (0%)                            |
| Antivirals/Antibiotics                                       | 2 (0%)                 | 2 (1%)                         | 0 (0%)                            |
| Baloxavir Marboxil                                           | 2 (0%)                 | 0 (0%)                         | 2 (1%)                            |
| Bromhexine                                                   | 2 (0%)                 | 1 (1%)                         | 1 (0%)                            |
| Cell-Based Therapies                                         | 2 (0%)                 | 1 (1%)                         | 1 (0%)                            |
| Chloroquine/Azithromycin                                     | 2 (0%)                 | 0 (0%)                         | 2 (1%)                            |
| Corticosteroids/Iv Immunoglobulin/ Or Siltuximab/Tocilizumab | 2 (0%)                 | 1 (1%)                         | 1 (0%)                            |
| Hydrocortisone                                               | 2 (0%)                 | 0 (0%)                         | 2 (1%)                            |
| Hyperimmune Immunoglobulin                                   | 2 (0%)                 | 1 (1%)                         | 1 (0%)                            |
| Immunoglobulins                                              | 2 (0%)                 | 0 (0%)                         | 2 (1%)                            |

## Comparative-effectiveness research of COVID-19 treatment: A rapid scoping review

|                                                                      | Total (n = 518) | With Protocol (n = 152) | Without Protocol (n = 366) |
|----------------------------------------------------------------------|-----------------|-------------------------|----------------------------|
| Interferon-Beta-1a                                                   | 2 (0%)          | 1 (1%)                  | 1 (0%)                     |
| Interleukin- 6 Inhibitors                                            | 2 (0%)          | 0 (0%)                  | 2 (1%)                     |
| Mesenchymal Stem Cells                                               | 2 (0%)          | 1 (1%)                  | 1 (0%)                     |
| Ruxolitinib                                                          | 2 (0%)          | 0 (0%)                  | 2 (1%)                     |
| Tocilizumab/Sarilumab                                                | 2 (0%)          | 0 (0%)                  | 2 (1%)                     |
| Acalabrutinib                                                        | 1 (0%)          | 0 (0%)                  | 1 (0%)                     |
| All Pharmacologicals                                                 | 1 (0%)          | 1 (1%)                  | 0 (0%)                     |
| Anticoagulant Therapeutic                                            | 1 (0%)          | 1 (1%)                  | 0 (0%)                     |
| Antiinflammatories                                                   | 1 (0%)          | 0 (0%)                  | 1 (0%)                     |
| Antiretroviral                                                       | 1 (0%)          | 0 (0%)                  | 1 (0%)                     |
| Antirheumatic                                                        | 1 (0%)          | 1 (1%)                  | 0 (0%)                     |
| Antitumor                                                            | 1 (0%)          | 0 (0%)                  | 1 (0%)                     |
| Arbidol/Lopinavir+Ritonavir                                          | 1 (0%)          | 0 (0%)                  | 1 (0%)                     |
| Aspirin                                                              | 1 (0%)          | 0 (0%)                  | 1 (0%)                     |
| Azithromycin/Hcq                                                     | 1 (0%)          | 0 (0%)                  | 1 (0%)                     |
| Azithromycin/Zinc                                                    | 1 (0%)          | 0 (0%)                  | 1 (0%)                     |
| Calcifediol                                                          | 1 (0%)          | 0 (0%)                  | 1 (0%)                     |
| Clazakisumab                                                         | 1 (0%)          | 1 (1%)                  | 0 (0%)                     |
| Convalescent Plasma Or Hyperimmune Plasma                            | 1 (0%)          | 0 (0%)                  | 1 (0%)                     |
| Corticosteroid/Antivirals                                            | 1 (0%)          | 0 (0%)                  | 1 (0%)                     |
| Corticosteroids/ Tocilizumab/Anakinra/Ivig                           | 1 (0%)          | 0 (0%)                  | 1 (0%)                     |
| Cytokine Therapy                                                     | 1 (0%)          | 0 (0%)                  | 1 (0%)                     |
| Dpp-4 Inhibitor                                                      | 1 (0%)          | 1 (1%)                  | 0 (0%)                     |
| Favipiravir/ Baloxavir Marboxil                                      | 1 (0%)          | 0 (0%)                  | 1 (0%)                     |
| Favipiravir/Other Antivirals                                         | 1 (0%)          | 0 (0%)                  | 1 (0%)                     |
| Galidesivir/Sofosbuvir/Ribavirin                                     | 1 (0%)          | 0 (0%)                  | 1 (0%)                     |
| Hydroxychloroquine/Antibiotics                                       | 1 (0%)          | 0 (0%)                  | 1 (0%)                     |
| Hydroxychloroquine/Azithromycin/Ribavirin/Interferon/Interferon Alfa | 1 (0%)          | 0 (0%)                  | 1 (0%)                     |
| Hydroxychloroquine/Chloroquine/Azithromycin                          | 1 (0%)          | 0 (0%)                  | 1 (0%)                     |
| Hydroxychloroquine/Chloroquine/Azithromycin/Or Lopinavir/Ritonavir   | 1 (0%)          | 1 (1%)                  | 0 (0%)                     |
| Hydroxychloroquine/Lopinavir-Ritonair                                | 1 (0%)          | 0 (0%)                  | 1 (0%)                     |
| Hydroxychloroquine/Ribavirin/Interferon/Interferon Alfa              | 1 (0%)          | 0 (0%)                  | 1 (0%)                     |
| Hyrdocortisone                                                       | 1 (0%)          | 0 (0%)                  | 1 (0%)                     |
| Ibrutinib                                                            | 1 (0%)          | 0 (0%)                  | 1 (0%)                     |
| Ifn B-1b/ Immunomodulatory/Antivirals                                | 1 (0%)          | 0 (0%)                  | 1 (0%)                     |
| Immune Modulation Drugs                                              | 1 (0%)          | 0 (0%)                  | 1 (0%)                     |
| Immune Therapy/Or Antiviral Therapy/Or Both                          | 1 (0%)          | 0 (0%)                  | 1 (0%)                     |
| Immunoglobulin                                                       | 1 (0%)          | 0 (0%)                  | 1 (0%)                     |
| Immunomodulation/Hcq/Cq                                              | 1 (0%)          | 0 (0%)                  | 1 (0%)                     |
| Prophylaxis Coagulant                                                | 1 (0%)          | 1 (1%)                  | 0 (0%)                     |
| Interferon-Beta/Rbv                                                  | 1 (0%)          | 0 (0%)                  | 1 (0%)                     |
| Interferon Alpha-2b                                                  | 1 (0%)          | 0 (0%)                  | 1 (0%)                     |
| Interferons                                                          | 1 (0%)          | 0 (0%)                  | 1 (0%)                     |
| Interleukin-6 Inhibitors                                             | 1 (0%)          | 1 (1%)                  | 0 (0%)                     |
| Interleukin-6/Tocilizumab                                            | 1 (0%)          | 1 (1%)                  | 0 (0%)                     |

**Comparative-effectiveness research of COVID-19 treatment: A rapid scoping review**

|                                                                | <b>Total (n = 518)</b> | <b>With Protocol (n = 152)</b> | <b>Without Protocol (n = 366)</b> |
|----------------------------------------------------------------|------------------------|--------------------------------|-----------------------------------|
| Intravenous Steroids                                           | 1 (0%)                 | 0 (0%)                         | 1 (0%)                            |
| Jak-Inhibitor/Type I Interferon                                | 1 (0%)                 | 0 (0%)                         | 1 (0%)                            |
| Levilimab                                                      | 1 (0%)                 | 1 (1%)                         | 0 (0%)                            |
| Lopinavir                                                      | 1 (0%)                 | 1 (1%)                         | 0 (0%)                            |
| Lopinavir-Ritonair/Arbidol                                     | 1 (0%)                 | 0 (0%)                         | 1 (0%)                            |
| Lopinavir-Ritonair/Azithromycin                                | 1 (0%)                 | 0 (0%)                         | 1 (0%)                            |
| Lopinavir-Ritonair/Remdesivir                                  | 1 (0%)                 | 0 (0%)                         | 1 (0%)                            |
| Lopinavir-Ritonair/Ribavirin/Interferon Beta                   | 1 (0%)                 | 0 (0%)                         | 1 (0%)                            |
| Meplazumab                                                     | 1 (0%)                 | 0 (0%)                         | 1 (0%)                            |
| Methylprednisone                                               | 1 (0%)                 | 0 (0%)                         | 1 (0%)                            |
| Neutralizing Antibody                                          | 1 (0%)                 | 0 (0%)                         | 1 (0%)                            |
| Nsaids                                                         | 1 (0%)                 | 0 (0%)                         | 1 (0%)                            |
| Olokizumab                                                     | 1 (0%)                 | 1 (1%)                         | 0 (0%)                            |
| Oseltamivir/Lopinavir/Ritonavir/Arbidol/Ribavirin/Sfjdc/ Other | 1 (0%)                 | 0 (0%)                         | 1 (0%)                            |
| Pentoxifylline                                                 | 1 (0%)                 | 0 (0%)                         | 1 (0%)                            |
| Recombinant Human Gcsf                                         | 1 (0%)                 | 0 (0%)                         | 1 (0%)                            |
| Renal Replacement Therapy/ Glucocorticoids                     | 1 (0%)                 | 0 (0%)                         | 1 (0%)                            |
| Repurposed Pharmacological Agents                              | 1 (0%)                 | 1 (1%)                         | 0 (0%)                            |
| Ribavirin                                                      | 1 (0%)                 | 1 (1%)                         | 0 (0%)                            |
| Rna-Dependent Rna Polymerase                                   | 1 (0%)                 | 0 (0%)                         | 1 (0%)                            |
| Sofosbuvir/Daclatasvir                                         | 1 (0%)                 | 0 (0%)                         | 1 (0%)                            |
| Stem Cell Therapy                                              | 1 (0%)                 | 0 (0%)                         | 1 (0%)                            |
| Sulodexide                                                     | 1 (0%)                 | 0 (0%)                         | 1 (0%)                            |
| Type I Interferons                                             | 1 (0%)                 | 0 (0%)                         | 1 (0%)                            |
| Vitamin C                                                      | 1 (0%)                 | 0 (0%)                         | 1 (0%)                            |

Note: NS-immunosuppressant: non-steroidal immunosuppressant. ACEI/ARB: angiotensin-converting enzyme (ACE) inhibitor and an angiotensin receptor blocker (ARB). IVIG: Intravenous immune globulin.
